# Supplementary material
Source: PubMed Central journal article supplement (PMC8514126)
Supplement: NIHMS1641253-supplement-1.pdf [file NIHMS1641253-supplement-1.pdf]

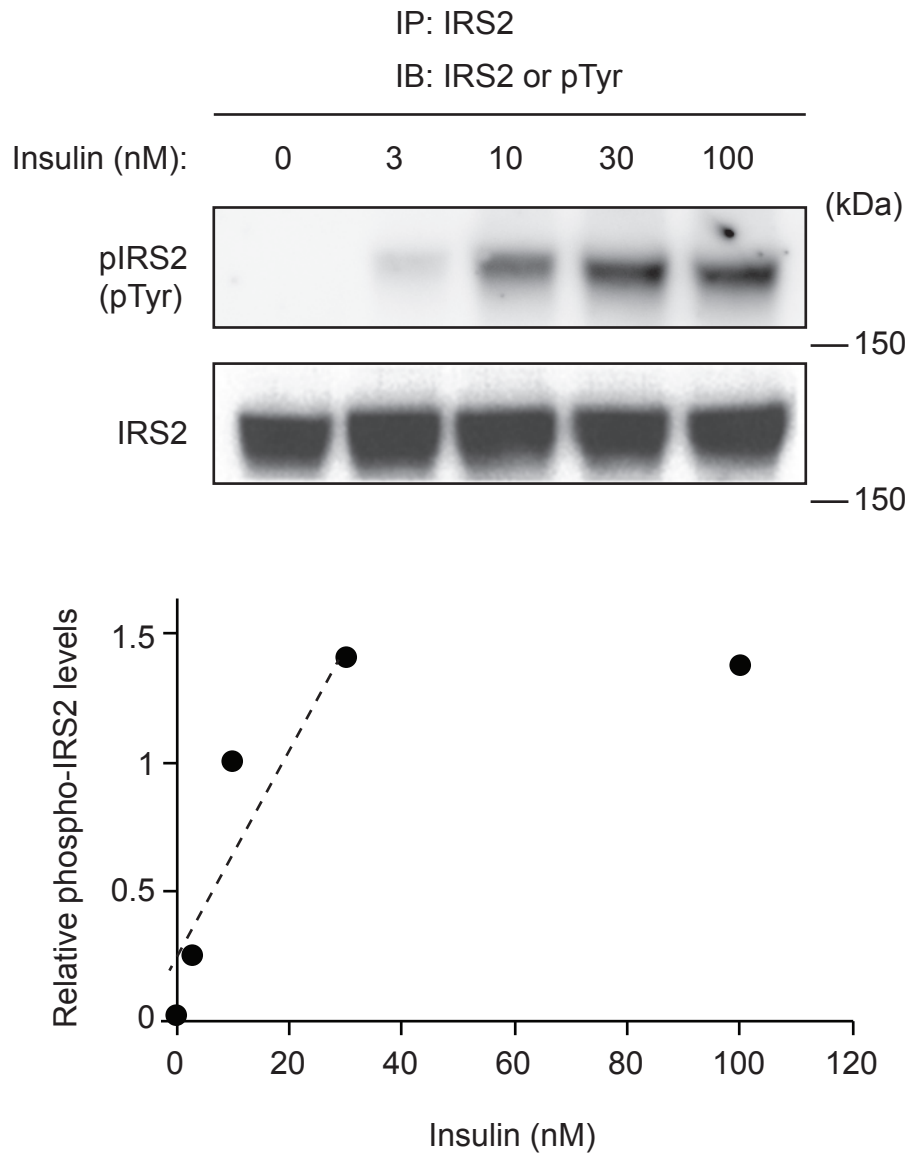

**Supplemental Fig. 1 Tyrosine phosphorylation of IRS2 in olfactory neuronal cells after insulin stimulation**

Olfactory neuronal cells derived from healthy controls were stimulated with different concentrations of insulin and characterized for the level of tyrosine phosphorylation of IRS2 (pIRS2). In this experiment, we demonstrated that the linearity of the signal (the level of tyrosine phosphorylation of IRS2) occurs between the insulin concentrations of 0 and 30 nM, which is indicated by a dotted line on the graph. Thus, we used 10 nM insulin for all experiments to be within the linear range of the pIRS2 signal.



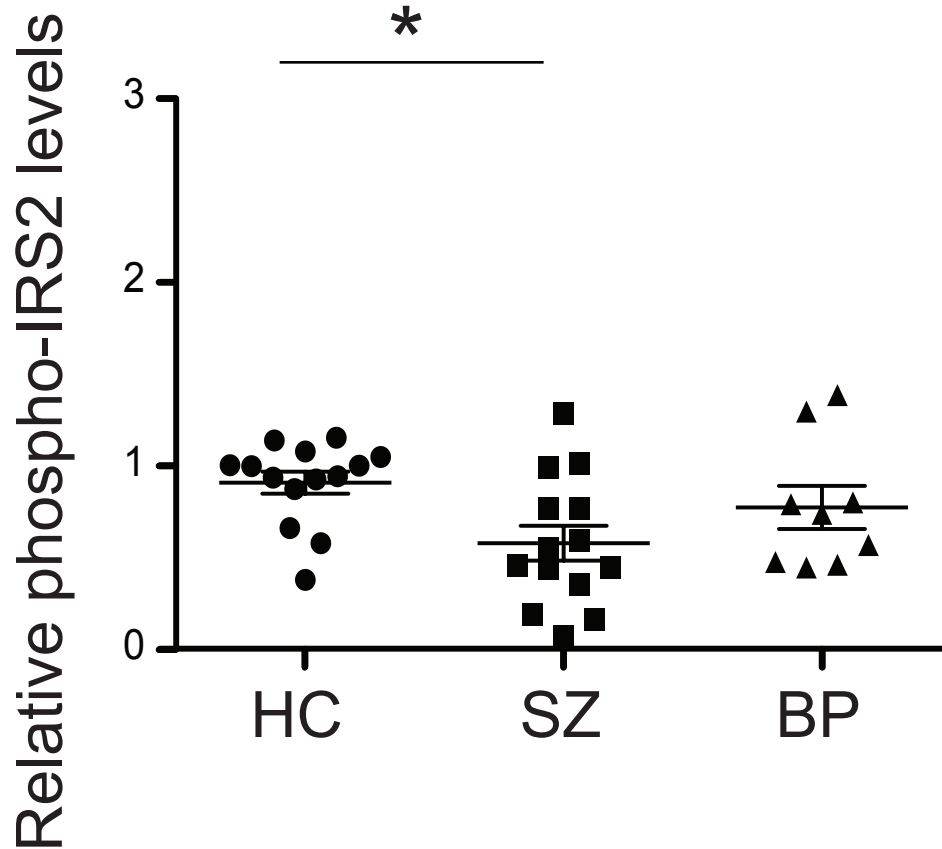

**Supplemental Fig. 3 Tyrosine phosphorylation of IRS2 in olfactory neuronal cells after excluding one healthy control outlier from the analysis (see Figure 2 including all the subjects)**

Olfactory neuronal cells derived from patients with SZ or BP as well as those from healthy controls (HC) were stimulated with insulin and characterized for the level of tyrosine phosphorylation of IRS2. Data are shown as mean  $\pm$  SEM. \*  $P=0.0269$  (one-way ANOVA, followed by Bonferroni's multiple comparison test). Though one possible outlier (higher than the average by more than two-fold standard deviation) was excluded in this analysis, the results did not change from the analysis including all the patients.

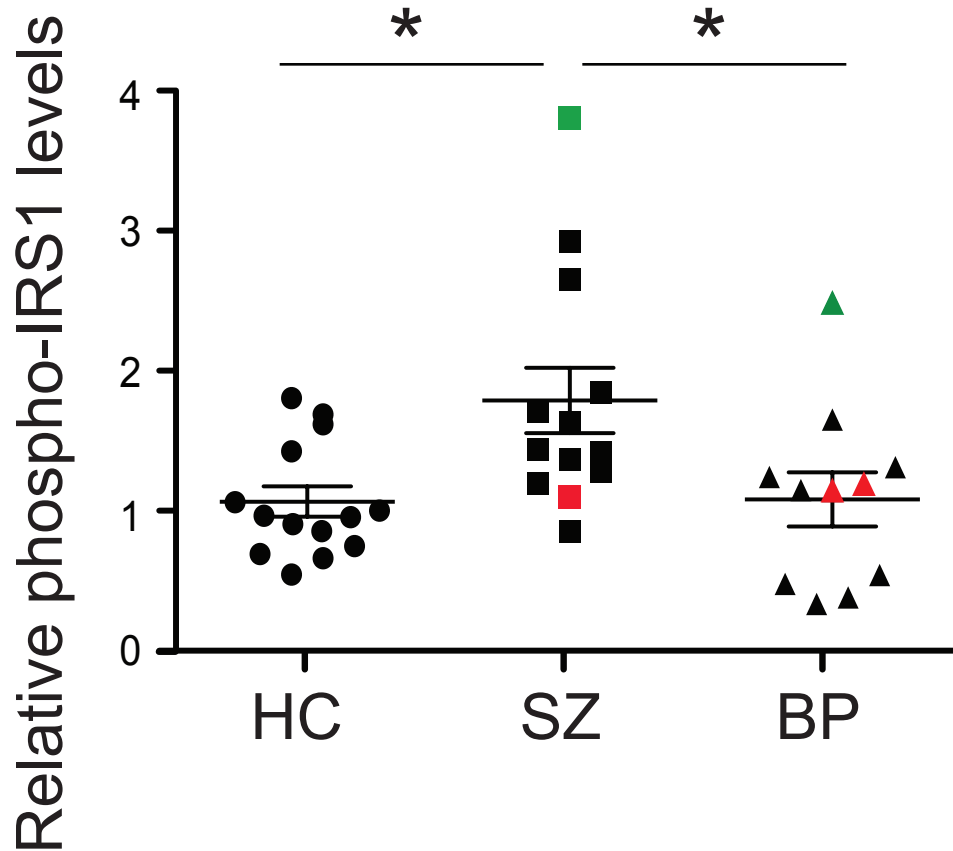

**Supplemental Fig. 4 IRS1 phosphorylation at serine-312 in olfactory neuronal cells derived from SZ and BP patients**

The level of IRS1 phosphorylation at serine-312 (pIRS1) was measured in olfactory neuronal cells derived from patients with SZ or BP and healthy controls (HC) at baseline (without insulin stimulation). Data are shown as mean  $\pm$  SEM. \* $P < 0.05$ . Red, 1 SZ patient who was pre-diabetic and 2 BP patients who had diabetes at the time of the nasal biopsy. Green, 2 outliers (1 SZ and 1 BP) that are different from the average at more than two-fold standard deviation. The inclusion and exclusion of these subjects (diabetic/pre-diabetic patients or outliers) did not change the scientific conclusions.

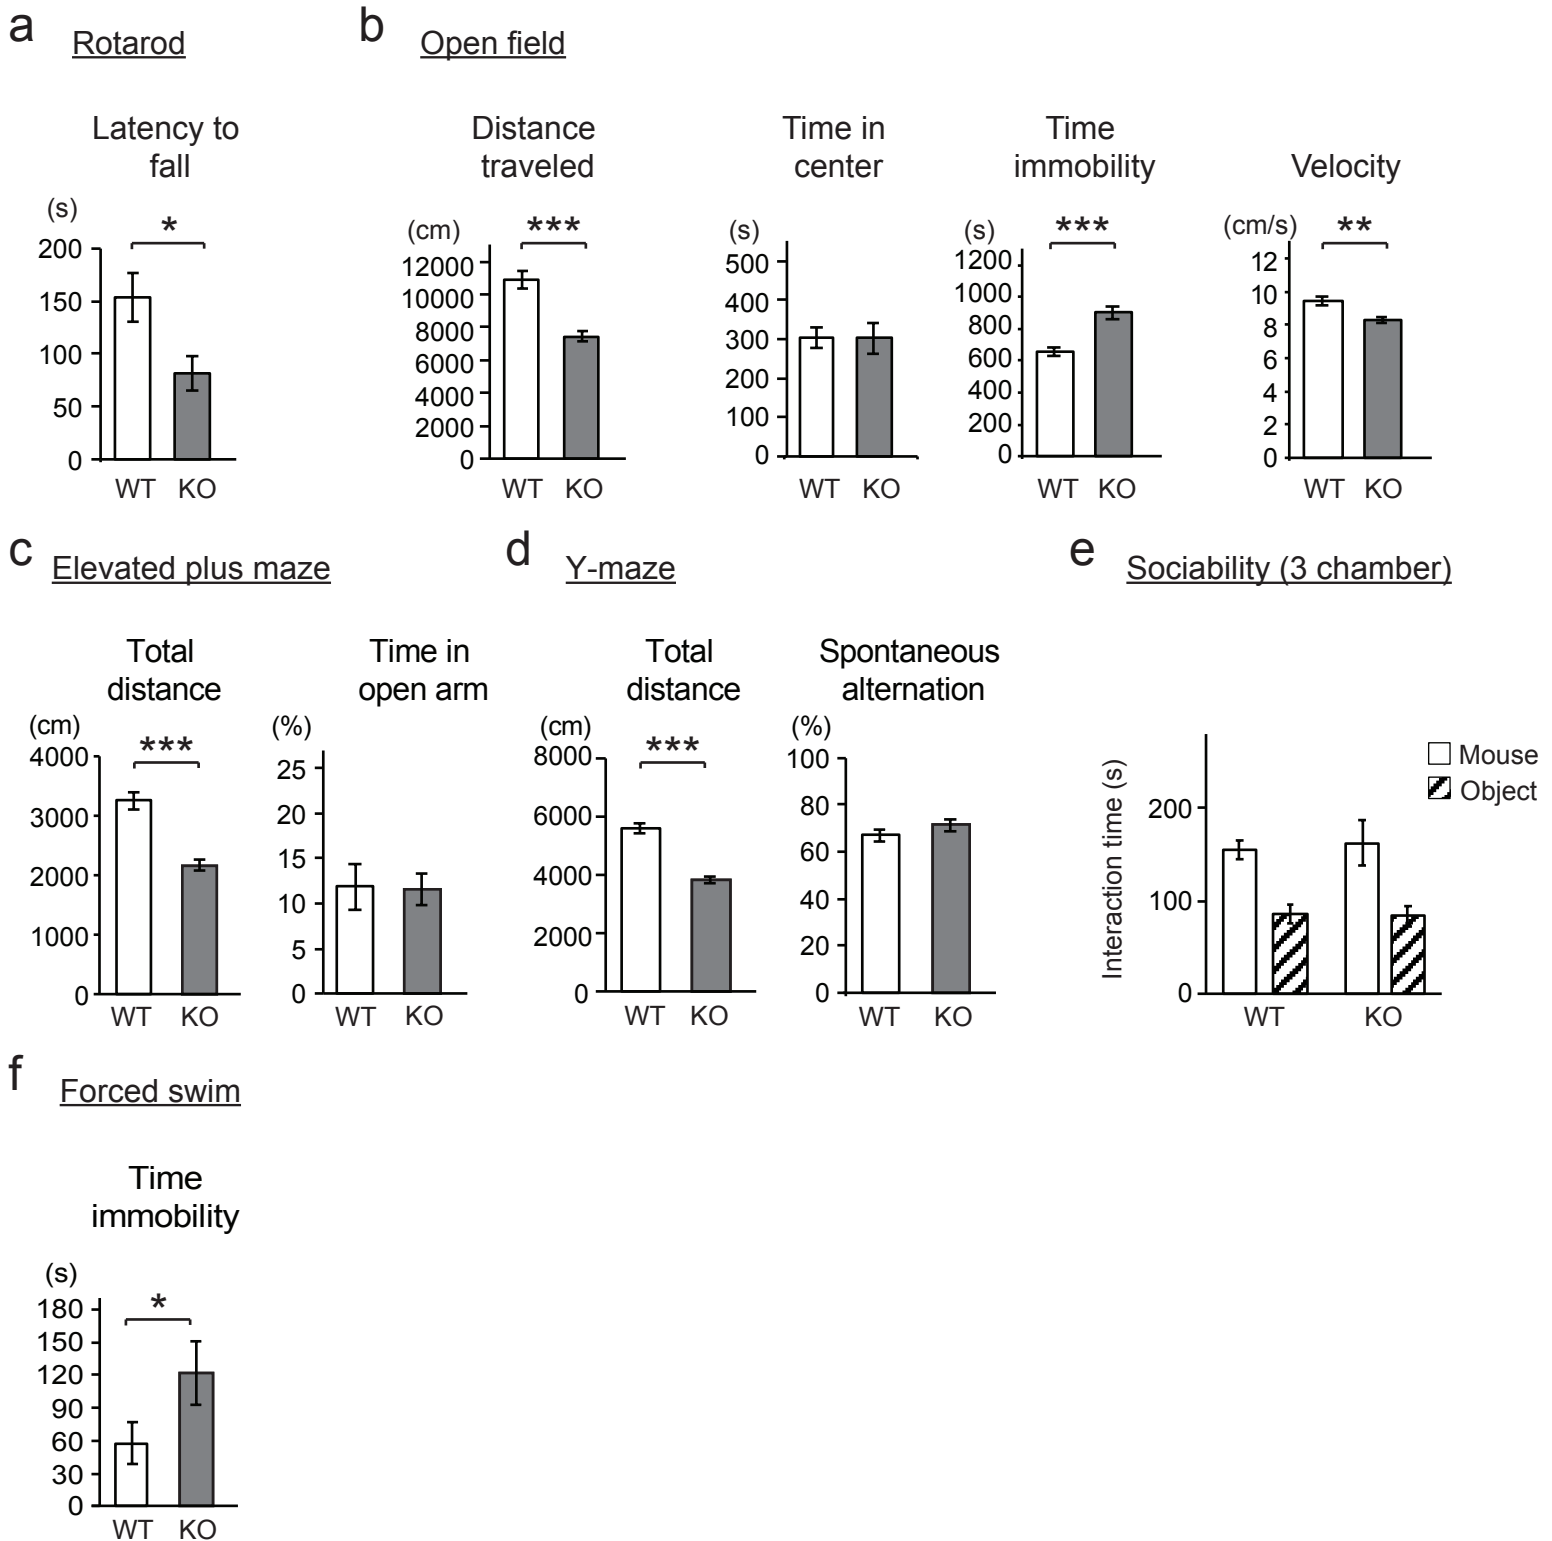

### Supplemental Fig. 5 Behavioral assays of *Irs2* KO mice

Male *Irs2* KO mice (N=9) and WT littermates (N=12) at 7 weeks of age were subjected to rotarod (a), open field (b), elevated plus maze (c), Y-maze (d), three-chamber social interaction (e), and forced swim test (f). Data are shown as mean  $\pm$  SEM. Statistical analysis was performed as described in the Materials and Methods. \*  $P < 0.05$ , \*\*  $P < 0.01$ , \*\*\*  $P < 0.001$ .

## Supplemental Table 1 | Psychiatric diagnostic classifications used in this study

---

### **Schizophrenia (SZ)**

ICD 8 codes 295.xx (except 295.79)

ICD10 codes F20

### **Bipolar disorder (BP)**

ICD 8 codes 296.19

296.39

ICD10 codes F30

F31

---

ICD 8, International Classification of Disease, eighth edition; ICD 10, International Classification of Disease, tenth edition

## **Supplemental Table 2 | Criteria for diabetes used in this study (at least one of the following)**

---

- 1) A diagnosis of diabetes (ICD-10 codes: E11-14, H36.0, and O24 excluding O24.4) registered in the Danish National Registry of Patients.
- 2) Chiropody for diabetic patients recorded in the National Health Insurance Service Registry.
- 3) Five blood glucose measurements within one year or two measurements per year in five consecutive years recorded in the National Health Insurance Service Registry.
- 4) A second purchase of oral glucose-lowering drugs recorded in the Register of Medical Product Statistics within six months (except for women aged 20-39 years prescribed metformin alone).
- 5) A second purchase of insulin recorded in the Register of Medical Product Statistics.

---

ICD 10, International Classification of Disease, tenth edition

**Supplemental Table 3a | Incidence of diabetes in each population**

| Population        | Person-years under risk | Incidence of diabetes | Rate per 1000 person-years |
|-------------------|-------------------------|-----------------------|----------------------------|
| <b>SZ</b>         |                         |                       |                            |
| Female            | 90232                   | 1016                  | 11.26                      |
| Male              | 127169                  | 1233                  | 9.70                       |
| <b>Without SZ</b> |                         |                       |                            |
| Female            | 31683091                | 120193                | 3.79                       |
| Male              | 31096993                | 131553                | 4.23                       |
| <b>BP</b>         |                         |                       |                            |
| Female            | 75160                   | 890                   | 11.84                      |
| Male              | 46690                   | 578                   | 12.38                      |
| <b>Without BP</b> |                         |                       |                            |
| Female            | 31698162                | 120319                | 3.80                       |
| Male              | 31177473                | 132208                | 4.24                       |

SZ, schizophrenia; BP, bipolar disorder



**Supplemental Table 3b | Incidence of schizophrenia (SZ) in each population**

| Population       | Person-years under risk | Incidence of SZ | Rate per 1000 person-years |
|------------------|-------------------------|-----------------|----------------------------|
| Diabetes         |                         |                 |                            |
| Female           | 590194                  | 117             | 0.198                      |
| Male             | 630997                  | 103             | 0.163                      |
| Without diabetes |                         |                 |                            |
| Female           | 25614775                | 4202            | 0.164                      |
| Male             | 24702092                | 5504            | 0.223                      |

SZ, schizophrenia

**Supplemental Table 3c | Incidence of bipolar disorder (BP) in each population**

| Population       | Person-years under risk | Incidence of BP | Rate per 1000 person-years |
|------------------|-------------------------|-----------------|----------------------------|
| Diabetes         |                         |                 |                            |
| Female           | 590704                  | 170             | 0.288                      |
| Male             | 634066                  | 166             | 0.262                      |
| Without diabetes |                         |                 |                            |
| Female           | 25629838                | 4296            | 0.168                      |
| Male             | 24782514                | 3176            | 0.128                      |

BP, bipolar disorder

## Supplemental Table 4 | Full model of log linear regression analyses for type 2 diabetes risk in female and male SZ

### (a) Female

| Variable                        | RR <sup>a</sup> (95% CI) |
|---------------------------------|--------------------------|
| SZ                              | 2.14 ( 2.00, 2.29)       |
| Without SZ                      | 1                        |
| Age group (years)               |                          |
| 0 - 10                          | 0.00 ( 0.00, 0.00)       |
| 10 - 19                         | 0.02 ( 0.01, 0.02)       |
| 20 - 29                         | 0.06 ( 0.06, 0.07)       |
| 30 - 39                         | 0.09 ( 0.09, 0.10)       |
| 40 - 49                         | 0.18 ( 0.17, 0.18)       |
| 50 - 59                         | 0.41 ( 0.40, 0.42)       |
| 60 - 69                         | 0.78 ( 0.76, 0.79)       |
| 70 - 79                         | 1.06 ( 1.04, 1.08)       |
| 80 -                            | 1                        |
| Calendar year                   |                          |
| 1997                            | 0.56 ( 0.54, 0.57)       |
| 1998 - 1999                     | 0.62 ( 0.61, 0.63)       |
| 2000 - 2001                     | 0.71 ( 0.70, 0.73)       |
| 2002 - 2003                     | 0.89 ( 0.88, 0.91)       |
| 2004 - 2005                     | 0.89 ( 0.87, 0.90)       |
| 2006 - 2007                     | 0.91 ( 0.89, 0.93)       |
| 2008 - 2009                     | 1                        |
| Urbanicity at birth             |                          |
| Capital                         | 0.92 ( 0.90, 0.93)       |
| Capital Suburb                  | 0.87 ( 0.84, 0.90)       |
| Provincial City                 | 1.05 ( 1.03, 1.07)       |
| Provincial Town                 | 1.00 ( 0.99, 1.02)       |
| Rural Area                      | 1                        |
| Family history of SZ (Maternal) | 0.79 ( 0.61, 1.03)       |
| Family history of SZ (Paternal) | 1.32 ( 1.00, 1.75)       |
| Family history of BP (Maternal) | 0.95 ( 0.80, 1.14)       |
| Family history of BP (Paternal) | 0.92 ( 0.73, 1.16)       |
| Family history of DM (Maternal) | 2.09 ( 2.02, 2.17)       |
| Family history of DM (Paternal) | 1.80 ( 1.73, 1.87)       |
| History of alcohol abuse        | 1.59 ( 1.53, 1.65)       |

### (b) Male

| Variable                        | RR <sup>a</sup> (95% CI) |
|---------------------------------|--------------------------|
| SZ                              | 1.80 ( 1.69, 1.91)       |
| Without SZ                      | 1                        |
| Age group (years)               |                          |
| 0 - 10                          | 0.00 ( 0.00, 0.00)       |
| 10 - 19                         | 0.01 ( 0.00, 0.01)       |
| 20 - 29                         | 0.02 ( 0.01, 0.02)       |
| 30 - 39                         | 0.06 ( 0.05, 0.06)       |
| 40 - 49                         | 0.18 ( 0.18, 0.19)       |
| 50 - 59                         | 0.47 ( 0.46, 0.48)       |
| 60 - 69                         | 0.83 ( 0.81, 0.85)       |
| 70 - 79                         | 1.04 ( 1.01, 1.06)       |
| 80 -                            | 1                        |
| Calendar year                   |                          |
| 1997                            | 0.53 ( 0.51, 0.54)       |
| 1998 - 1999                     | 0.61 ( 0.60, 0.63)       |
| 2000 - 2001                     | 0.68 ( 0.67, 0.70)       |
| 2002 - 2003                     | 0.84 ( 0.82, 0.86)       |
| 2004 - 2005                     | 0.86 ( 0.84, 0.88)       |
| 2006 - 2007                     | 0.88 ( 0.86, 0.90)       |
| 2008 - 2009                     | 1                        |
| Urbanicity at birth             |                          |
| Capital                         | 1.05 ( 1.03, 1.06)       |
| Capital Suburb                  | 1.02 ( 0.99, 1.05)       |
| Provincial City                 | 1.09 ( 1.07, 1.11)       |
| Provincial Town                 | 1.04 ( 1.02, 1.05)       |
| Rural Area                      | 1                        |
| Family history of SZ (Maternal) | 0.89 ( 0.71, 1.12)       |
| Family history of SZ (Paternal) | 0.86 ( 0.60, 1.21)       |
| Family history of BP (Maternal) | 0.93 ( 0.79, 1.09)       |
| Family history of BP (Paternal) | 0.83 ( 0.66, 1.05)       |
| Family history of DM (Maternal) | 1.92 ( 1.85, 1.98)       |
| Family history of DM (Paternal) | 1.68 ( 1.62, 1.74)       |
| History of alcohol abuse        | 1.55 ( 1.51, 1.59)       |

SZ, schizophrenia; BP, bipolar disorder; DM, diabetes mellitus.

<sup>a</sup>Variables are mutually adjusted.

**Supplemental Table 5 | Full model of log linear regression analyses for type 2 diabetes risk in female and male BP**

| <b>(a) Female</b>               |                          | <b>(b) Male</b>                 |                          |
|---------------------------------|--------------------------|---------------------------------|--------------------------|
| Variable                        | RR <sup>a</sup> (95% CI) | Variable                        | RR <sup>a</sup> (95% CI) |
| BP                              | 1.63 ( 1.52, 1.75)       | BP                              | 1.38 ( 1.26, 1.50)       |
| Without BP                      | 1                        | Without BP                      | 1                        |
| Age group (years)               |                          | Age group (years)               |                          |
| 0 - 10                          | 0.00 ( 0.00, 0.00)       | 0 - 10                          | 0.00 ( 0.00, 0.00)       |
| 10 - 19                         | 0.02 ( 0.01, 0.02)       | 10 - 19                         | 0.01 ( 0.00, 0.01)       |
| 20 - 29                         | 0.06 ( 0.06, 0.07)       | 20 - 29                         | 0.02 ( 0.01, 0.02)       |
| 30 - 39                         | 0.09 ( 0.09, 0.10)       | 30 - 39                         | 0.06 ( 0.05, 0.06)       |
| 40 - 49                         | 0.18 ( 0.17, 0.18)       | 40 - 49                         | 0.18 ( 0.18, 0.19)       |
| 50 - 59                         | 0.41 ( 0.40, 0.42)       | 50 - 59                         | 0.47 ( 0.46, 0.48)       |
| 60 - 69                         | 0.78 ( 0.76, 0.79)       | 60 - 69                         | 0.83 ( 0.81, 0.85)       |
| 70 - 79                         | 1.06 ( 1.04, 1.08)       | 70 - 79                         | 1.04 ( 1.01, 1.06)       |
| 80 -                            | 1                        | 80 -                            | 1                        |
| Calendar year                   |                          | Calendar year                   |                          |
| 1997                            | 0.56 ( 0.54, 0.57)       | 1997                            | 0.53 ( 0.51, 0.54)       |
| 1998 - 1999                     | 0.62 ( 0.61, 0.63)       | 1998 - 1999                     | 0.61 ( 0.60, 0.63)       |
| 2000 - 2001                     | 0.71 ( 0.70, 0.73)       | 2000 - 2001                     | 0.68 ( 0.67, 0.70)       |
| 2002 - 2003                     | 0.89 ( 0.88, 0.91)       | 2002 - 2003                     | 0.84 ( 0.82, 0.86)       |
| 2004 - 2005                     | 0.89 ( 0.87, 0.90)       | 2004 - 2005                     | 0.86 ( 0.84, 0.88)       |
| 2006 - 2007                     | 0.91 ( 0.89, 0.93)       | 2006 - 2007                     | 0.88 ( 0.86, 0.90)       |
| 2008 - 2009                     | 1                        | 2008 - 2009                     | 1                        |
| Urbanicity at birth             |                          | Urbanicity at birth             |                          |
| Capital                         | 0.92 ( 0.90, 0.94)       | Capital                         | 1.05 ( 1.03, 1.07)       |
| Capital Suburb                  | 0.87 ( 0.85, 0.90)       | Capital Suburb                  | 1.02 ( 0.99, 1.05)       |
| Provincial City                 | 1.05 ( 1.03, 1.07)       | Provincial City                 | 1.09 ( 1.07, 1.11)       |
| Provincial Town                 | 1.00 ( 0.99, 1.02)       | Provincial Town                 | 1.04 ( 1.02, 1.05)       |
| Rural Area                      | 1                        | Rural Area                      | 1                        |
| Family history of SZ (Maternal) | 0.82 ( 0.63, 1.06)       | Family history of SZ (Maternal) | 0.92 ( 0.73, 1.15)       |
| Family history of SZ (Paternal) | 1.35 ( 1.02, 1.79)       | Family history of SZ (Paternal) | 0.88 ( 0.62, 1.25)       |
| Family history of BP (Maternal) | 0.95 ( 0.79, 1.13)       | Family history of BP (Maternal) | 0.93 ( 0.79, 1.10)       |
| Family history of BP (Paternal) | 0.92 ( 0.73, 1.15)       | Family history of BP (Paternal) | 0.83 ( 0.66, 1.05)       |
| Family history of DM (Maternal) | 2.10 ( 2.02, 2.18)       | Family history of DM (Maternal) | 1.92 ( 1.85, 1.98)       |
| Family history of DM (Paternal) | 1.80 ( 1.73, 1.87)       | Family history of DM (Paternal) | 1.68 ( 1.62, 1.74)       |
| History of alcohol abuse        | 1.60 ( 1.54, 1.66)       | History of alcohol abuse        | 1.57 ( 1.53, 1.61)       |

SZ, schizophrenia; BP, bipolar disorder; DM, diabetes mellitus.

<sup>a</sup>Variables are mutually adjusted.

## Supplemental Table 6 | Full model of log linear regression analyses for SZ and BP risk in diabetes type 1&2

| <b>(a) SZ risk</b>              |                          | <b>(b) BP risk</b>              |                          |
|---------------------------------|--------------------------|---------------------------------|--------------------------|
| Variable                        | RR <sup>a</sup> (95% CI) | Variable                        | RR <sup>a</sup> (95% CI) |
| <b>Female</b>                   |                          | <b>Female</b>                   |                          |
| Type1 DM                        | 2.91 ( 2.11, 4.01)       | Type1 DM                        | 1.70 ( 1.23, 2.35)       |
| Type2 DM                        | 1.68 ( 1.34, 2.11)       | Type2 DM                        | 1.32 ( 1.11, 1.57)       |
| Without DM                      | 1                        | Without DM                      | 1                        |
| <b>Male</b>                     |                          | <b>Male</b>                     |                          |
| Type1 DM                        | 1.37 ( 0.96, 1.94)       | Type1 DM                        | 1.04 ( 0.72, 1.49)       |
| Type2 DM                        | 1.79 ( 1.41, 2.27)       | Type2 DM                        | 1.54 ( 1.29, 1.83)       |
| Without DM                      | 1                        | Without DM                      | 1                        |
| <b>Age group (years)</b>        |                          | <b>Age group (years)</b>        |                          |
| <b>Female</b>                   |                          | <b>Female</b>                   |                          |
| 15 - 24                         | 20.60 ( 14.32, 29.62)    | 15 - 24                         | 0.88 ( 0.74, 1.06)       |
| 25 - 34                         | 13.30 ( 9.24, 19.15)     | 25 - 34                         | 1.33 ( 1.13, 1.58)       |
| 35 - 44                         | 9.31 ( 6.46, 13.42)      | 35 - 44                         | 1.60 ( 1.36, 1.88)       |
| 45 - 54                         | 7.52 ( 5.21, 10.86)      | 45 - 54                         | 1.91 ( 1.63, 2.24)       |
| 55 - 64                         | 4.45 ( 3.06, 6.47)       | 55 - 64                         | 1.81 ( 1.54, 2.12)       |
| 65 - 74                         | 4.43 ( 3.02, 6.49)       | 65 - 74                         | 1.71 ( 1.45, 2.03)       |
| 75 -                            | 2.64 ( 1.77, 3.94)       | 75 -                            | 1.51 ( 1.27, 1.80)       |
| <b>Male</b>                     |                          | <b>Male</b>                     |                          |
| 15 - 24                         | 25.86 ( 18.01, 37.15)    | 15 - 24                         | 0.61 ( 0.51, 0.74)       |
| 25 - 34                         | 21.06 ( 14.66, 30.25)    | 25 - 34                         | 0.84 ( 0.71, 1.00)       |
| 35 - 44                         | 11.13 ( 7.74, 16.02)     | 35 - 44                         | 0.96 ( 0.81, 1.13)       |
| 45 - 54                         | 6.00 ( 4.16, 8.67)       | 45 - 54                         | 1.28 ( 1.09, 1.51)       |
| 55 - 64                         | 2.29 ( 1.56, 3.36)       | 55 - 64                         | 1.28 ( 1.09, 1.50)       |
| 65 - 74                         | 1.83 ( 1.21, 2.76)       | 65 - 74                         | 1.01 ( 0.84, 1.21)       |
| 75 -                            | 1                        | 75 -                            | 1                        |
| <b>Calendar year</b>            |                          | <b>Calendar year</b>            |                          |
| 1997                            | 1.07 ( 0.98, 1.17)       | 1997                            | 0.89 ( 0.80, 0.98)       |
| 1998 - 1999                     | 1.15 ( 1.07, 1.24)       | 1998 - 1999                     | 0.86 ( 0.79, 0.93)       |
| 2000 - 2001                     | 1.14 ( 1.06, 1.23)       | 2000 - 2001                     | 0.90 ( 0.83, 0.98)       |
| 2002 - 2003                     | 1.15 ( 1.07, 1.23)       | 2002 - 2003                     | 0.88 ( 0.81, 0.95)       |
| 2004 - 2005                     | 0.97 ( 0.90, 1.05)       | 2004 - 2005                     | 0.93 ( 0.86, 1.00)       |
| 2006 - 2007                     | 0.94 ( 0.87, 1.01)       | 2006 - 2007                     | 0.91 ( 0.84, 0.98)       |
| 2008 - 2009                     | 1                        | 2008 - 2009                     | 1                        |
| <b>Urbanicity at birth</b>      |                          | <b>Urbanicity at birth</b>      |                          |
| Capital                         | 1.85 ( 1.74, 1.96)       | Capital                         | 1.13 ( 1.06, 1.20)       |
| Capital Suburb                  | 1.53 ( 1.42, 1.65)       | Capital Suburb                  | 1.05 ( 0.95, 1.16)       |
| Provincial City                 | 1.20 ( 1.12, 1.29)       | Provincial City                 | 1.25 ( 1.16, 1.34)       |
| Provincial Town                 | 1.16 ( 1.09, 1.22)       | Provincial Town                 | 1.07 ( 1.01, 1.13)       |
| Rural Area                      | 1                        | Rural Area                      | 1                        |
| Family history of SZ (Maternal) | 4.73 ( 4.03, 5.55)       | Family history of SZ (Maternal) | 1.89 ( 1.40, 2.54)       |
| Family history of SZ (Paternal) | 3.61 ( 2.93, 4.44)       | Family history of SZ (Paternal) | 2.51 ( 1.77, 3.55)       |
| Family history of BP (Maternal) | 2.06 ( 1.69, 2.52)       | Family history of BP (Maternal) | 6.88 ( 5.84, 8.10)       |
| Family history of BP (Paternal) | 2.13 ( 1.67, 2.72)       | Family history of BP (Paternal) | 5.64 ( 4.55, 6.99)       |
| Family history of DM (Maternal) | 1.29 ( 1.18, 1.41)       | Family history of DM (Maternal) | 0.99 ( 0.88, 1.11)       |
| Family history of DM (Paternal) | 1.11 ( 1.02, 1.21)       | Family history of DM (Paternal) | 1.09 ( 0.98, 1.21)       |
| History of alcohol abuse        | 10.69 ( 10.14, 11.26)    | History of alcohol abuse        | 11.82 ( 11.19, 12.48)    |

SZ, schizophrenia; BP, bipolar disorder; DM, diabetes mellitus.

<sup>a</sup>Variables are mutually adjusted.

**Supplemental Table 7 | Analysis of gene expression in human olfactory neuronal cells (PsychENCODE data)**

| <b>Gene symbols</b> | <b>FDR (differential expression analysis)</b> | <b>Differentially expressed gene? Y, Yes; N, No</b> | <b>Number of insulin related publications</b> | <b>Insulin related gene? Y, Yes; N, No</b> |
|---------------------|-----------------------------------------------|-----------------------------------------------------|-----------------------------------------------|--------------------------------------------|
| U1                  | 9.77E-10                                      | Y                                                   | 13                                            | N                                          |
| GTSF1               | 5.50E-07                                      | Y                                                   | 0                                             | N                                          |
| ESAM                | 3.79E-06                                      | Y                                                   | 1                                             | N                                          |
| IGFBP5              | 0.000554091                                   | Y                                                   | 248                                           | Y                                          |
| COL21A1             | 0.002312876                                   | Y                                                   | 0                                             | N                                          |
| GAS1                | 0.00247259                                    | Y                                                   | 5                                             | N                                          |
| ACAN                | 0.005687362                                   | Y                                                   | 30                                            | N                                          |
| HTR2B               | 0.0057707                                     | Y                                                   | 9                                             | N                                          |
| IL32                | 0.0057707                                     | Y                                                   | 4                                             | N                                          |
| TBX20               | 0.0057707                                     | Y                                                   | 6                                             | N                                          |
| SLC14A1             | 0.006658086                                   | Y                                                   | 1                                             | N                                          |
| VEGFD               | 0.006658086                                   | Y                                                   | 6                                             | N                                          |
| AL590004.4          | 0.009825873                                   | Y                                                   | 0                                             | N                                          |
| WNT5A               | 0.009825873                                   | Y                                                   | 56                                            | N                                          |
| FAM110C             | 0.027096996                                   | Y                                                   | 0                                             | N                                          |
| JAK1                | 0.02976228                                    | Y                                                   | 106                                           | Y                                          |
| FLG                 | 0.034077928                                   | Y                                                   | 8                                             | N                                          |
| CHI3L1              | 0.034887149                                   | Y                                                   | 52                                            | N                                          |
| FOXO3               | 0.034887149                                   | Y                                                   | 245                                           | Y                                          |
| GAS1RR              | 0.034887149                                   | Y                                                   | 0                                             | N                                          |
| CCL11               | 0.036722699                                   | Y                                                   | 22                                            | N                                          |
| AC092162.2          | 0.041247792                                   | Y                                                   | 0                                             | N                                          |
| AC007618.1          | 0.045333362                                   | Y                                                   | 0                                             | N                                          |
| MCAM                | 0.045333362                                   | Y                                                   | 8                                             | N                                          |
| PPARGC1A            | 0.045333362                                   | Y                                                   | 616                                           | Y                                          |
| ARHGAP26            | 0.046125165                                   | Y                                                   | 1                                             | N                                          |
| ZNF793              | 0.046125165                                   | Y                                                   | 0                                             | N                                          |
| PCDHB10             | 0.046375694                                   | Y                                                   | 0                                             | N                                          |
| AC093535.2          | 0.049082268                                   | Y                                                   | 0                                             | N                                          |
| APOD                | 0.049082268                                   | Y                                                   | 12                                            | N                                          |
| EEF1A1P6            | 0.049082268                                   | Y                                                   | 0                                             | N                                          |
| GTSE1-AS1           | 0.049082268                                   | Y                                                   | 0                                             | N                                          |
| PCDHB2              | 0.049082268                                   | Y                                                   | 0                                             | N                                          |
| PIWIL2              | 0.049082268                                   | Y                                                   | 2                                             | N                                          |
| SRPK2               | 0.049082268                                   | Y                                                   | 1                                             | N                                          |
| TNFSF18             | 0.049082268                                   | Y                                                   | 2                                             | N                                          |
| MSC-AS1             | 0.055020004                                   | N                                                   | 0                                             | N                                          |
| TANC2               | 0.057126583                                   | N                                                   | 0                                             | N                                          |
| AC084357.3          | 0.05919182                                    | N                                                   | 0                                             | N                                          |
| EFHC2               | 0.05919182                                    | N                                                   | 0                                             | N                                          |
| GABRA4              | 0.05919182                                    | N                                                   | 0                                             | N                                          |
| JAM2                | 0.05919182                                    | N                                                   | 1                                             | N                                          |
| PCDHB3              | 0.05919182                                    | N                                                   | 0                                             | N                                          |
| PII5                | 0.05919182                                    | N                                                   | 10                                            | N                                          |
| PRKCA               | 0.05919182                                    | N                                                   | 49                                            | N                                          |
| SLPI                | 0.05919182                                    | N                                                   | 11                                            | N                                          |
| TCEANC              | 0.05919182                                    | N                                                   | 0                                             | N                                          |
| NRXN3               | 0.061993776                                   | N                                                   | 4                                             | N                                          |
| ARL2BPP2            | 0.064207421                                   | N                                                   | 0                                             | N                                          |
| LYL1                | 0.069321751                                   | N                                                   | 2                                             | N                                          |
| FAM110B             | 0.072770561                                   | N                                                   | 0                                             | N                                          |
| IL1RAPL1            | 0.072770561                                   | N                                                   | 0                                             | N                                          |
| ZNF585B             | 0.072770561                                   | N                                                   | 0                                             | N                                          |
| MEF2A               | 0.078081228                                   | N                                                   | 47                                            | N                                          |
| CLEC3B              | 0.079344835                                   | N                                                   | 1                                             | N                                          |
| LINC02535           | 0.079344835                                   | N                                                   | 0                                             | N                                          |
| PCDHB16             | 0.079344835                                   | N                                                   | 0                                             | N                                          |
| RC3H1-IT1           | 0.079344835                                   | N                                                   | 0                                             | N                                          |
| SCGB3A2             | 0.079344835                                   | N                                                   | 0                                             | N                                          |
| SLC38A1             | 0.079344835                                   | N                                                   | 7                                             | N                                          |
| FTH1P10             | 0.083324636                                   | N                                                   | 0                                             | N                                          |
| SLC46A3             | 0.083324636                                   | N                                                   | 0                                             | N                                          |
| PIFO                | 0.085226636                                   | N                                                   | 0                                             | N                                          |
| PNLDC1              | 0.085226636                                   | N                                                   | 0                                             | N                                          |

| Gene symbols | FDR (differential expression analysis) | Differentially expressed gene? Y, Yes; N, No | Number of insulin related publications | Insulin related gene? Y, Yes; N, No |
|--------------|----------------------------------------|----------------------------------------------|----------------------------------------|-------------------------------------|
| BACE2        | 0.085813904                            | N                                            | 21                                     | N                                   |
| RNF130       | 0.087772636                            | N                                            | 0                                      | N                                   |
| FRMD6        | 0.08805007                             | N                                            | 0                                      | N                                   |
| AC106785.1   | 0.088276921                            | N                                            | 0                                      | N                                   |
| AC022919.1   | 0.092939189                            | N                                            | 0                                      | N                                   |
| AC064836.1   | 0.098820552                            | N                                            | 0                                      | N                                   |
| AC097532.2   | 0.098820552                            | N                                            | 0                                      | N                                   |
| LEP          | 0.098820552                            | N                                            | 325                                    | Y                                   |
| LINC00662    | 0.098820552                            | N                                            | 0                                      | N                                   |
| LITAF        | 0.098820552                            | N                                            | 4                                      | N                                   |
| NRF1         | 0.098820552                            | N                                            | 80                                     | N                                   |
| PRRC1        | 0.098820552                            | N                                            | 0                                      | N                                   |
| SLC1A7       | 0.098820552                            | N                                            | 1                                      | N                                   |
| SSBP3        | 0.098820552                            | N                                            | 2                                      | N                                   |
| LINC01013    | 0.099008997                            | N                                            | 0                                      | N                                   |
| ZNF677       | 0.099232631                            | N                                            | 0                                      | N                                   |
| LRRC61       | 0.102124197                            | N                                            | 0                                      | N                                   |
| PCDHB4       | 0.102124197                            | N                                            | 0                                      | N                                   |
| CHEK2        | 0.102191029                            | N                                            | 5                                      | N                                   |
| OXCT2        | 0.102412527                            | N                                            | 0                                      | N                                   |
| ZNF558       | 0.102412527                            | N                                            | 0                                      | N                                   |
| AL359513.1   | 0.102526419                            | N                                            | 0                                      | N                                   |
| ASB2         | 0.102526419                            | N                                            | 1                                      | N                                   |
| BTRC         | 0.102526419                            | N                                            | 0                                      | N                                   |
| CST1         | 0.102526419                            | N                                            | 2                                      | N                                   |
| HAS1         | 0.102526419                            | N                                            | 12                                     | N                                   |
| HLA-V        | 0.102526419                            | N                                            | 0                                      | N                                   |
| KCNMB1       | 0.102526419                            | N                                            | 0                                      | N                                   |
| MIR100HG     | 0.102526419                            | N                                            | 0                                      | N                                   |
| PCDHB13      | 0.102526419                            | N                                            | 0                                      | N                                   |
| PDE4DIP      | 0.102526419                            | N                                            | 0                                      | N                                   |
| PIMREG       | 0.102526419                            | N                                            | 0                                      | N                                   |
| SLC10A4      | 0.102526419                            | N                                            | 0                                      | N                                   |
| SSPN         | 0.102526419                            | N                                            | 1                                      | N                                   |
| TRPC4        | 0.102526419                            | N                                            | 5                                      | N                                   |
| UNC5D        | 0.103340153                            | N                                            | 1                                      | N                                   |
| MID2         | 0.104080361                            | N                                            | 0                                      | N                                   |
| HERPUD1      | 0.10423279                             | N                                            | 3                                      | N                                   |
| ENPP1        | 0.105756272                            | N                                            | 110                                    | Y                                   |
| WASL         | 0.10702048                             | N                                            | 8                                      | N                                   |
| INMT         | 0.10888093                             | N                                            | 0                                      | N                                   |
| CWC25        | 0.109231236                            | N                                            | 0                                      | N                                   |
| RYBP         | 0.110959368                            | N                                            | 3                                      | N                                   |
| CTH          | 0.111077453                            | N                                            | 9                                      | N                                   |
| ALDH1L2      | 0.111640084                            | N                                            | 1                                      | N                                   |
| CLDN1        | 0.111640084                            | N                                            | 8                                      | N                                   |
| FBXL20       | 0.111640084                            | N                                            | 0                                      | N                                   |
| OVCH1-AS1    | 0.111640084                            | N                                            | 0                                      | N                                   |
| PCDHA4       | 0.111640084                            | N                                            | 0                                      | N                                   |
| PRRG1        | 0.111640084                            | N                                            | 0                                      | N                                   |
| USP8P1       | 0.111640084                            | N                                            | 0                                      | N                                   |
| VDR          | 0.111640084                            | N                                            | 258                                    | Y                                   |
| ZNF559       | 0.111640084                            | N                                            | 0                                      | N                                   |
| CDK13        | 0.115539406                            | N                                            | 0                                      | N                                   |
| ARL6IP1      | 0.116497448                            | N                                            | 2                                      | N                                   |
| KCNG3        | 0.118832837                            | N                                            | 0                                      | N                                   |
| NAGS         | 0.118832837                            | N                                            | 1                                      | N                                   |
| FBXO32       | 0.121985007                            | N                                            | 123                                    | Y                                   |
| IL1R2        | 0.121985007                            | N                                            | 10                                     | N                                   |
| NEURL1B      | 0.121985007                            | N                                            | 0                                      | N                                   |
| ALG1L13P     | 0.123517619                            | N                                            | 0                                      | N                                   |
| FMO4         | 0.123517619                            | N                                            | 9                                      | N                                   |
| FTO          | 0.123517619                            | N                                            | 252                                    | Y                                   |
| PPM1H        | 0.123517619                            | N                                            | 0                                      | N                                   |
| PRELID2P1    | 0.123517619                            | N                                            | 0                                      | N                                   |
| AZI2         | 0.123909064                            | N                                            | 0                                      | N                                   |

| Gene symbols | FDR (differential expression analysis) | Differentially expressed gene? Y, Yes; N, No | Number of insulin related publications | Insulin related gene? Y, Yes; N, No |
|--------------|----------------------------------------|----------------------------------------------|----------------------------------------|-------------------------------------|
| DSCR3        | 0.123909064                            | N                                            | 0                                      | N                                   |
| ORMDL1       | 0.123909064                            | N                                            | 0                                      | N                                   |
| ARL6IP1P2    | 0.125259501                            | N                                            | 0                                      | N                                   |
| SASH1        | 0.125259501                            | N                                            | 1                                      | N                                   |
| SLC7A14      | 0.125259501                            | N                                            | 0                                      | N                                   |
| AC020937.1   | 0.125778765                            | N                                            | 0                                      | N                                   |
| AL139289.2   | 0.125778765                            | N                                            | 0                                      | N                                   |
| ZNF836       | 0.125778765                            | N                                            | 0                                      | N                                   |
| AC016957.2   | 0.126692737                            | N                                            | 0                                      | N                                   |
| PILRB        | 0.126692737                            | N                                            | 0                                      | N                                   |
| CYP39A1      | 0.126980116                            | N                                            | 2                                      | N                                   |
| ZFAND5       | 0.127295147                            | N                                            | 0                                      | N                                   |
| FBXL17       | 0.130360877                            | N                                            | 0                                      | N                                   |
| AC019080.5   | 0.134086819                            | N                                            | 0                                      | N                                   |
| CNST         | 0.134086819                            | N                                            | 0                                      | N                                   |
| NIPAL2       | 0.134086819                            | N                                            | 0                                      | N                                   |
| OGT          | 0.134086819                            | N                                            | 121                                    | Y                                   |
| TNFAIP8L1    | 0.134086819                            | N                                            | 0                                      | N                                   |
| AC110794.1   | 0.136826997                            | N                                            | 0                                      | N                                   |
| AL137186.2   | 0.136826997                            | N                                            | 0                                      | N                                   |
| AL583856.1   | 0.136826997                            | N                                            | 0                                      | N                                   |
| GRAMD2B      | 0.136826997                            | N                                            | 0                                      | N                                   |
| AC010980.2   | 0.139368083                            | N                                            | 0                                      | N                                   |
| ANTXR1       | 0.139368083                            | N                                            | 0                                      | N                                   |
| ARHGAP11B    | 0.139368083                            | N                                            | 0                                      | N                                   |
| ASPN         | 0.139368083                            | N                                            | 6                                      | N                                   |
| BMP8B        | 0.139368083                            | N                                            | 3                                      | N                                   |
| DERL3        | 0.139368083                            | N                                            | 0                                      | N                                   |
| FGF7P6       | 0.139368083                            | N                                            | 0                                      | N                                   |
| GRB7         | 0.139368083                            | N                                            | 40                                     | N                                   |
| HLCS         | 0.139368083                            | N                                            | 2                                      | N                                   |
| KBTBD7       | 0.139368083                            | N                                            | 0                                      | N                                   |
| LINC02172    | 0.139368083                            | N                                            | 0                                      | N                                   |
| LRRTM3       | 0.139368083                            | N                                            | 0                                      | N                                   |
| LYPD1        | 0.139368083                            | N                                            | 0                                      | N                                   |
| PIGZ         | 0.139368083                            | N                                            | 0                                      | N                                   |
| POU6F1       | 0.139368083                            | N                                            | 1                                      | N                                   |
| PTPRM        | 0.139368083                            | N                                            | 1                                      | N                                   |
| RPS4XP1      | 0.139368083                            | N                                            | 0                                      | N                                   |
| SIK2         | 0.139368083                            | N                                            | 23                                     | N                                   |
| SOS1         | 0.139368083                            | N                                            | 23                                     | N                                   |
| SRSF4        | 0.139368083                            | N                                            | 2                                      | N                                   |
| UST          | 0.139368083                            | N                                            | 22                                     | N                                   |
| ZNF568       | 0.139368083                            | N                                            | 1                                      | N                                   |
| TNFSF4       | 0.139537793                            | N                                            | 3                                      | N                                   |
| AL079341.1   | 0.140299357                            | N                                            | 0                                      | N                                   |
| FAT4         | 0.140720117                            | N                                            | 1                                      | N                                   |
| MARCH6       | 0.144137467                            | N                                            | 1                                      | N                                   |
| AC007064.2   | 0.145221547                            | N                                            | 0                                      | N                                   |
| AL359851.1   | 0.145221547                            | N                                            | 0                                      | N                                   |
| ARNT         | 0.145221547                            | N                                            | 73                                     | N                                   |
| BRD7P2       | 0.145221547                            | N                                            | 0                                      | N                                   |
| CBLB         | 0.145221547                            | N                                            | 21                                     | N                                   |
| CDH19        | 0.145221547                            | N                                            | 0                                      | N                                   |
| CHURC1       | 0.145221547                            | N                                            | 1                                      | N                                   |
| HMGB2        | 0.145221547                            | N                                            | 3                                      | N                                   |
| PCDHB15      | 0.145221547                            | N                                            | 0                                      | N                                   |
| PLA2G4C      | 0.145221547                            | N                                            | 0                                      | N                                   |
| PRC1         | 0.145221547                            | N                                            | 19                                     | N                                   |
| PSAT1        | 0.145221547                            | N                                            | 2                                      | N                                   |
| SPG21        | 0.145221547                            | N                                            | 0                                      | N                                   |
| ZNF652       | 0.145221547                            | N                                            | 1                                      | N                                   |
| STEAP2       | 0.145769555                            | N                                            | 1                                      | N                                   |
| AL645940.1   | 0.146070047                            | N                                            | 0                                      | N                                   |
| RNMT         | 0.146070047                            | N                                            | 0                                      | N                                   |
| CASP10       | 0.146664969                            | N                                            | 3                                      | N                                   |



| Gene symbols | FDR (differential expression analysis) | Differentially expressed gene? Y, Yes; N, No | Number of insulin related publications | Insulin related gene? Y, Yes; N, No |
|--------------|----------------------------------------|----------------------------------------------|----------------------------------------|-------------------------------------|
| IMPA2        | 0.146664969                            | N                                            | 0                                      | N                                   |
| LINC01719    | 0.146664969                            | N                                            | 0                                      | N                                   |
| LINC01775    | 0.146664969                            | N                                            | 0                                      | N                                   |
| PITPNA-AS1   | 0.146664969                            | N                                            | 0                                      | N                                   |
| RCAN2        | 0.146664969                            | N                                            | 0                                      | N                                   |
| SLC2A10      | 0.147798912                            | N                                            | 12                                     | N                                   |
| CYP46A1      | 0.150057696                            | N                                            | 1                                      | N                                   |
| DNMT3B       | 0.150096604                            | N                                            | 30                                     | N                                   |
| GLS          | 0.15136824                             | N                                            | 19                                     | N                                   |
| MESP2        | 0.15136824                             | N                                            | 0                                      | N                                   |
| AC006254.1   | 0.151503994                            | N                                            | 0                                      | N                                   |
| AC026401.3   | 0.151503994                            | N                                            | 0                                      | N                                   |
| CENPA        | 0.151503994                            | N                                            | 1                                      | N                                   |
| EXD2         | 0.151503994                            | N                                            | 0                                      | N                                   |
| PCNX1        | 0.151503994                            | N                                            | 0                                      | N                                   |
| RAB9A        | 0.151503994                            | N                                            | 0                                      | N                                   |
| AC110588.1   | 0.151577447                            | N                                            | 0                                      | N                                   |
| AC003984.1   | 0.152633812                            | N                                            | 0                                      | N                                   |
| AC004945.1   | 0.152633812                            | N                                            | 0                                      | N                                   |
| AC073529.1   | 0.152633812                            | N                                            | 0                                      | N                                   |
| AHCYL2       | 0.152633812                            | N                                            | 3                                      | N                                   |
| ANO10        | 0.152633812                            | N                                            | 0                                      | N                                   |
| DAB2         | 0.152633812                            | N                                            | 8                                      | N                                   |
| DNAJC16      | 0.152633812                            | N                                            | 0                                      | N                                   |
| EFCAB14      | 0.152633812                            | N                                            | 0                                      | N                                   |
| KCNH5        | 0.152633812                            | N                                            | 0                                      | N                                   |
| KRI1         | 0.152633812                            | N                                            | 0                                      | N                                   |
| MRPL35P3     | 0.152633812                            | N                                            | 0                                      | N                                   |
| NEFL         | 0.152633812                            | N                                            | 2                                      | N                                   |
| PCDHB18P     | 0.152633812                            | N                                            | 0                                      | N                                   |
| PLCXD2       | 0.152633812                            | N                                            | 0                                      | N                                   |
| RARRES1      | 0.152633812                            | N                                            | 2                                      | N                                   |
| RPL41        | 0.152633812                            | N                                            | 0                                      | N                                   |
| SRPK2P       | 0.152633812                            | N                                            | 0                                      | N                                   |
| AC048382.6   | 0.153170247                            | N                                            | 0                                      | N                                   |
| AC087289.5   | 0.153170247                            | N                                            | 0                                      | N                                   |
| ARMC9        | 0.153170247                            | N                                            | 0                                      | N                                   |
| BRD9         | 0.153170247                            | N                                            | 1                                      | N                                   |
| CDCA3        | 0.153170247                            | N                                            | 0                                      | N                                   |
| COL12A1      | 0.153170247                            | N                                            | 3                                      | N                                   |
| DIP2B        | 0.153170247                            | N                                            | 1                                      | N                                   |
| FNDC3B       | 0.153170247                            | N                                            | 1                                      | N                                   |
| GYPC         | 0.153170247                            | N                                            | 4                                      | N                                   |
| HK2          | 0.153170247                            | N                                            | 61                                     | N                                   |
| MGP          | 0.153170247                            | N                                            | 18                                     | N                                   |
| RORC         | 0.153170247                            | N                                            | 15                                     | N                                   |
| RPL12P38     | 0.153170247                            | N                                            | 0                                      | N                                   |
| SPATA13      | 0.153170247                            | N                                            | 0                                      | N                                   |
| HIST1H2APS5  | 0.153823072                            | N                                            | 0                                      | N                                   |
| IGFLR1       | 0.153823072                            | N                                            | 1                                      | N                                   |
| KIF4B        | 0.153823072                            | N                                            | 0                                      | N                                   |
| AFF1         | 0.15478616                             | N                                            | 1                                      | N                                   |
| ARHGEF39     | 0.15478616                             | N                                            | 0                                      | N                                   |
| NRL          | 0.15478616                             | N                                            | 18                                     | N                                   |
| AL450998.1   | 0.15487767                             | N                                            | 0                                      | N                                   |
| CKS1B        | 0.15487767                             | N                                            | 3                                      | N                                   |
| NEXMIF       | 0.15487767                             | N                                            | 0                                      | N                                   |
| ZNF281       | 0.15487767                             | N                                            | 0                                      | N                                   |
| ERG          | 0.155619703                            | N                                            | 79                                     | N                                   |
| GARS         | 0.155619703                            | N                                            | 3                                      | N                                   |
| RBM20        | 0.155619703                            | N                                            | 3                                      | N                                   |
| Z93241.1     | 0.155619703                            | N                                            | 0                                      | N                                   |
| NUSAP1       | 0.157616419                            | N                                            | 0                                      | N                                   |
| AC012485.1   | 0.15973783                             | N                                            | 0                                      | N                                   |
| ACOX1        | 0.15973783                             | N                                            | 43                                     | N                                   |
| GTSE1        | 0.15973783                             | N                                            | 0                                      | N                                   |

| Gene symbols | FDR (differential expression analysis) | Differentially expressed gene? Y, Yes; N, No | Number of insulin related publications | Insulin related gene? Y, Yes; N, No |
|--------------|----------------------------------------|----------------------------------------------|----------------------------------------|-------------------------------------|
| KIF2C        | 0.15973783                             | N                                            | 1                                      | N                                   |
| MIA3         | 0.15973783                             | N                                            | 0                                      | N                                   |
| POT1         | 0.15973783                             | N                                            | 0                                      | N                                   |
| PSAT1P3      | 0.15973783                             | N                                            | 0                                      | N                                   |
| RACGAP1P     | 0.15973783                             | N                                            | 0                                      | N                                   |
| RNF111       | 0.15973783                             | N                                            | 0                                      | N                                   |
| MPHOSPH9     | 0.161345303                            | N                                            | 1                                      | N                                   |
| CENPF        | 0.161578979                            | N                                            | 0                                      | N                                   |
| KRT38        | 0.161578979                            | N                                            | 0                                      | N                                   |
| POC1A        | 0.161578979                            | N                                            | 2                                      | N                                   |
| PPP1R26-AS1  | 0.161578979                            | N                                            | 0                                      | N                                   |
| SLC6A16      | 0.161578979                            | N                                            | 0                                      | N                                   |
| FAM83D       | 0.162685295                            | N                                            | 0                                      | N                                   |
| KIF22        | 0.162685295                            | N                                            | 1                                      | N                                   |
| MTUS2        | 0.163180979                            | N                                            | 0                                      | N                                   |
| AC005332.9   | 0.165960755                            | N                                            | 0                                      | N                                   |
| KNSTRN       | 0.165960755                            | N                                            | 0                                      | N                                   |
| PCDHGA10     | 0.165960755                            | N                                            | 0                                      | N                                   |
| TMEM106C     | 0.166176449                            | N                                            | 0                                      | N                                   |
| HMGB3        | 0.166250508                            | N                                            | 1                                      | N                                   |
| JAZF1-AS1    | 0.166250508                            | N                                            | 0                                      | N                                   |
| SNAP25       | 0.166250508                            | N                                            | 89                                     | N                                   |
| SNX18        | 0.166250508                            | N                                            | 0                                      | N                                   |
| AC092570.2   | 0.166941842                            | N                                            | 0                                      | N                                   |
| CDC42BPA     | 0.167260109                            | N                                            | 1                                      | N                                   |
| CTTNBP2NL    | 0.167260109                            | N                                            | 0                                      | N                                   |
| PODN         | 0.167260109                            | N                                            | 0                                      | N                                   |
| ZNF235       | 0.167260109                            | N                                            | 0                                      | N                                   |
| COL1A2       | 0.167468363                            | N                                            | 639                                    | Y                                   |
| DIRC3        | 0.167468363                            | N                                            | 0                                      | N                                   |
| FGF7         | 0.167468363                            | N                                            | 74                                     | N                                   |
| GSK3B        | 0.167468363                            | N                                            | 446                                    | Y                                   |
| RAET1E       | 0.167468363                            | N                                            | 0                                      | N                                   |
| UBE2CP3      | 0.167468363                            | N                                            | 0                                      | N                                   |
| ZCCHC7       | 0.167468363                            | N                                            | 0                                      | N                                   |
| ZNF471       | 0.16766337                             | N                                            | 0                                      | N                                   |
| CCDC80       | 0.167813974                            | N                                            | 4                                      | N                                   |
| GREM1        | 0.167813974                            | N                                            | 4                                      | N                                   |
| INMT-MINDY4  | 0.167939094                            | N                                            | 0                                      | N                                   |
| AC025181.2   | 0.169512821                            | N                                            | 0                                      | N                                   |
| AL359237.1   | 0.169512821                            | N                                            | 0                                      | N                                   |
| IGSF23       | 0.169512821                            | N                                            | 0                                      | N                                   |
| ZSCAN18      | 0.169512821                            | N                                            | 0                                      | N                                   |
| EGFEM1P      | 0.170628851                            | N                                            | 0                                      | N                                   |
| PIK3C2B      | 0.170628851                            | N                                            | 4                                      | N                                   |
| USP4         | 0.170835927                            | N                                            | 2                                      | N                                   |
| FAM239A      | 0.171253402                            | N                                            | 0                                      | N                                   |
| LPL          | 0.171253402                            | N                                            | 1000                                   | Y                                   |
| AC004158.1   | 0.171350413                            | N                                            | 0                                      | N                                   |
| AL591122.2   | 0.171350413                            | N                                            | 0                                      | N                                   |
| BIRC5        | 0.171350413                            | N                                            | 74                                     | N                                   |
| DBF4B        | 0.171350413                            | N                                            | 0                                      | N                                   |
| EFCAB11      | 0.171350413                            | N                                            | 0                                      | N                                   |
| GXYLT2       | 0.171350413                            | N                                            | 0                                      | N                                   |
| OSBPL9P3     | 0.171350413                            | N                                            | 0                                      | N                                   |
| RN7SL16P     | 0.171350413                            | N                                            | 0                                      | N                                   |
| SNHG10       | 0.171350413                            | N                                            | 0                                      | N                                   |
| TMX4         | 0.171350413                            | N                                            | 0                                      | N                                   |
| TSC22D3      | 0.171350413                            | N                                            | 7                                      | N                                   |
| LINC02275    | 0.171367688                            | N                                            | 0                                      | N                                   |
| PHF19        | 0.171367688                            | N                                            | 0                                      | N                                   |
| INHBB        | 0.171573607                            | N                                            | 14                                     | N                                   |
| RTN4IP1      | 0.171573607                            | N                                            | 0                                      | N                                   |
| KIF20A       | 0.171749755                            | N                                            | 0                                      | N                                   |
| TOP2A        | 0.171749755                            | N                                            | 14                                     | N                                   |
| UBAC2        | 0.171749755                            | N                                            | 0                                      | N                                   |

| Gene symbols | FDR (differential expression analysis) | Differentially expressed gene? Y, Yes; N, No | Number of insulin related publications | Insulin related gene? Y, Yes; N, No |
|--------------|----------------------------------------|----------------------------------------------|----------------------------------------|-------------------------------------|
| SUPT3H       | 0.172007735                            | N                                            | 0                                      | N                                   |
| IL4I1        | 0.172040922                            | N                                            | 0                                      | N                                   |
| PIF1         | 0.172040922                            | N                                            | 0                                      | N                                   |
| CHRNA10      | 0.17279443                             | N                                            | 0                                      | N                                   |
| SPAG5        | 0.174741847                            | N                                            | 0                                      | N                                   |
| AC015802.4   | 0.175331366                            | N                                            | 0                                      | N                                   |
| SEPT1        | 0.175885845                            | N                                            | 0                                      | N                                   |
| AC007114.1   | 0.175885845                            | N                                            | 0                                      | N                                   |
| AC026951.1   | 0.175885845                            | N                                            | 0                                      | N                                   |
| AC091053.1   | 0.175885845                            | N                                            | 0                                      | N                                   |
| AC092279.2   | 0.175885845                            | N                                            | 0                                      | N                                   |
| AC097717.1   | 0.175885845                            | N                                            | 0                                      | N                                   |
| AC104771.1   | 0.175885845                            | N                                            | 0                                      | N                                   |
| AL137145.1   | 0.175885845                            | N                                            | 0                                      | N                                   |
| ANLN         | 0.175885845                            | N                                            | 0                                      | N                                   |
| AP003469.4   | 0.175885845                            | N                                            | 0                                      | N                                   |
| APBB1IP      | 0.175885845                            | N                                            | 0                                      | N                                   |
| ASPM         | 0.175885845                            | N                                            | 1                                      | N                                   |
| ATRN         | 0.175885845                            | N                                            | 3                                      | N                                   |
| B4GALT1      | 0.175885845                            | N                                            | 5                                      | N                                   |
| BMPR2        | 0.175885845                            | N                                            | 37                                     | N                                   |
| C17orf67     | 0.175885845                            | N                                            | 0                                      | N                                   |
| CACHD1       | 0.175885845                            | N                                            | 0                                      | N                                   |
| CCDC34       | 0.175885845                            | N                                            | 0                                      | N                                   |
| CCDC6        | 0.175885845                            | N                                            | 2                                      | N                                   |
| CCL8         | 0.175885845                            | N                                            | 10                                     | N                                   |
| CDC25C       | 0.175885845                            | N                                            | 10                                     | N                                   |
| CEP192       | 0.175885845                            | N                                            | 0                                      | N                                   |
| CHP1         | 0.175885845                            | N                                            | 1                                      | N                                   |
| CNTROB       | 0.175885845                            | N                                            | 0                                      | N                                   |
| CSMD1        | 0.175885845                            | N                                            | 4                                      | N                                   |
| CYP2G1P      | 0.175885845                            | N                                            | 0                                      | N                                   |
| DEPDC1       | 0.175885845                            | N                                            | 0                                      | N                                   |
| DHFR         | 0.175885845                            | N                                            | 15                                     | N                                   |
| DHTKD1       | 0.175885845                            | N                                            | 5                                      | N                                   |
| DLGAP5       | 0.175885845                            | N                                            | 0                                      | N                                   |
| DNM3OS       | 0.175885845                            | N                                            | 2                                      | N                                   |
| EEF1A2       | 0.175885845                            | N                                            | 5                                      | N                                   |
| ELP2         | 0.175885845                            | N                                            | 0                                      | N                                   |
| ELP5         | 0.175885845                            | N                                            | 1                                      | N                                   |
| FUT10        | 0.175885845                            | N                                            | 0                                      | N                                   |
| GAS2L3       | 0.175885845                            | N                                            | 0                                      | N                                   |
| GEMIN2P1     | 0.175885845                            | N                                            | 0                                      | N                                   |
| GFRA1        | 0.175885845                            | N                                            | 1                                      | N                                   |
| GID4         | 0.175885845                            | N                                            | 0                                      | N                                   |
| HAUS1P2      | 0.175885845                            | N                                            | 0                                      | N                                   |
| HMGB1        | 0.175885845                            | N                                            | 116                                    | Y                                   |
| HMGB2P1      | 0.175885845                            | N                                            | 0                                      | N                                   |
| HSPA4L       | 0.175885845                            | N                                            | 0                                      | N                                   |
| IFI44        | 0.175885845                            | N                                            | 1                                      | N                                   |
| IL6STP1      | 0.175885845                            | N                                            | 0                                      | N                                   |
| ITPR1        | 0.175885845                            | N                                            | 11                                     | N                                   |
| KCNJ6        | 0.175885845                            | N                                            | 3                                      | N                                   |
| KIDINS220    | 0.175885845                            | N                                            | 0                                      | N                                   |
| KIF18A       | 0.175885845                            | N                                            | 0                                      | N                                   |
| KLHL30       | 0.175885845                            | N                                            | 0                                      | N                                   |
| KMT2C        | 0.175885845                            | N                                            | 1                                      | N                                   |
| LINC00607    | 0.175885845                            | N                                            | 0                                      | N                                   |
| LINC01151    | 0.175885845                            | N                                            | 0                                      | N                                   |
| LINC02035    | 0.175885845                            | N                                            | 0                                      | N                                   |
| LMNB2        | 0.175885845                            | N                                            | 3                                      | N                                   |
| MALT1        | 0.175885845                            | N                                            | 2                                      | N                                   |
| ME1          | 0.175885845                            | N                                            | 20                                     | N                                   |
| MERTK        | 0.175885845                            | N                                            | 9                                      | N                                   |
| MGAM         | 0.175885845                            | N                                            | 7                                      | N                                   |
| MST1L        | 0.175885845                            | N                                            | 0                                      | N                                   |

| Gene symbols | FDR (differential expression analysis) | Differentially expressed gene? Y, Yes; N, No | Number of insulin related publications | Insulin related gene? Y, Yes; N, No |
|--------------|----------------------------------------|----------------------------------------------|----------------------------------------|-------------------------------------|
| MT1JP        | 0.175885845                            | N                                            | 0                                      | N                                   |
| MTA2         | 0.175885845                            | N                                            | 0                                      | N                                   |
| MYO1D        | 0.175885845                            | N                                            | 0                                      | N                                   |
| MYO6         | 0.175885845                            | N                                            | 1                                      | N                                   |
| MZT1P1       | 0.175885845                            | N                                            | 0                                      | N                                   |
| NAP1L4       | 0.175885845                            | N                                            | 2                                      | N                                   |
| NRP1         | 0.175885845                            | N                                            | 6                                      | N                                   |
| P3H2         | 0.175885845                            | N                                            | 0                                      | N                                   |
| PARVA        | 0.175885845                            | N                                            | 1                                      | N                                   |
| PEAK1        | 0.175885845                            | N                                            | 0                                      | N                                   |
| PGRMC1       | 0.175885845                            | N                                            | 10                                     | N                                   |
| PLEKHA1      | 0.175885845                            | N                                            | 5                                      | N                                   |
| PLEKHA8P1    | 0.175885845                            | N                                            | 0                                      | N                                   |
| PLPPR4       | 0.175885845                            | N                                            | 0                                      | N                                   |
| PLSCR4       | 0.175885845                            | N                                            | 2                                      | N                                   |
| POU5F1P5     | 0.175885845                            | N                                            | 0                                      | N                                   |
| PRDM1        | 0.175885845                            | N                                            | 4                                      | N                                   |
| PSRC1        | 0.175885845                            | N                                            | 0                                      | N                                   |
| PTGS2        | 0.175885845                            | N                                            | 523                                    | Y                                   |
| PXDN         | 0.175885845                            | N                                            | 0                                      | N                                   |
| RACGAP1      | 0.175885845                            | N                                            | 0                                      | N                                   |
| RECK         | 0.175885845                            | N                                            | 9                                      | N                                   |
| RHNO1        | 0.175885845                            | N                                            | 0                                      | N                                   |
| RN7SL689P    | 0.175885845                            | N                                            | 0                                      | N                                   |
| RNMTL1P1     | 0.175885845                            | N                                            | 0                                      | N                                   |
| SAPCD2       | 0.175885845                            | N                                            | 0                                      | N                                   |
| SCAND2P      | 0.175885845                            | N                                            | 0                                      | N                                   |
| SIGLEC15     | 0.175885845                            | N                                            | 0                                      | N                                   |
| SLC24A4      | 0.175885845                            | N                                            | 1                                      | N                                   |
| SLC30A1      | 0.175885845                            | N                                            | 7                                      | N                                   |
| SPC24        | 0.175885845                            | N                                            | 0                                      | N                                   |
| TANC1        | 0.175885845                            | N                                            | 0                                      | N                                   |
| TCF7L2       | 0.175885845                            | N                                            | 408                                    | Y                                   |
| THAP10       | 0.175885845                            | N                                            | 0                                      | N                                   |
| TMEM2        | 0.175885845                            | N                                            | 0                                      | N                                   |
| TRMT12       | 0.175885845                            | N                                            | 0                                      | N                                   |
| TTC17        | 0.175885845                            | N                                            | 0                                      | N                                   |
| UBE4B        | 0.175885845                            | N                                            | 0                                      | N                                   |
| USP39        | 0.175885845                            | N                                            | 0                                      | N                                   |
| WARS         | 0.175885845                            | N                                            | 60                                     | N                                   |
| ZDHHC9       | 0.175885845                            | N                                            | 0                                      | N                                   |
| ZNF208       | 0.175885845                            | N                                            | 0                                      | N                                   |
| GPATCH1      | 0.176149257                            | N                                            | 0                                      | N                                   |
| ADAM21       | 0.176525254                            | N                                            | 0                                      | N                                   |
| BUB1         | 0.176525254                            | N                                            | 4                                      | N                                   |
| C8orf22      | 0.176525254                            | N                                            | 0                                      | N                                   |
| CHRD1        | 0.176525254                            | N                                            | 1                                      | N                                   |
| CKS2         | 0.176525254                            | N                                            | 0                                      | N                                   |
| EOGT         | 0.176525254                            | N                                            | 0                                      | N                                   |
| GSE1         | 0.176525254                            | N                                            | 0                                      | N                                   |
| PSAT1P1      | 0.176525254                            | N                                            | 0                                      | N                                   |
| SEPT7-AS1    | 0.176525254                            | N                                            | 0                                      | N                                   |
| AC237221.2   | 0.176933719                            | N                                            | 0                                      | N                                   |
| ADAMTS5      | 0.176933719                            | N                                            | 19                                     | N                                   |
| AL592293.2   | 0.176933719                            | N                                            | 0                                      | N                                   |
| GINS4        | 0.176933719                            | N                                            | 0                                      | N                                   |
| HELZ         | 0.176933719                            | N                                            | 1                                      | N                                   |
| SH3D19       | 0.176933719                            | N                                            | 0                                      | N                                   |
| SHPK         | 0.176933719                            | N                                            | 0                                      | N                                   |
| ZKSCAN8      | 0.176933719                            | N                                            | 0                                      | N                                   |
| GSTM2P1      | 0.176964905                            | N                                            | 0                                      | N                                   |
| AC006213.2   | 0.177142643                            | N                                            | 0                                      | N                                   |
| AL662889.1   | 0.177142643                            | N                                            | 0                                      | N                                   |
| ARPP21       | 0.177142643                            | N                                            | 1                                      | N                                   |
| ASS1P9       | 0.177142643                            | N                                            | 0                                      | N                                   |
| AURKA        | 0.177142643                            | N                                            | 12                                     | N                                   |

| Gene symbols | FDR (differential expression analysis) | Differentially expressed gene? Y, Yes; N, No | Number of insulin related publications | Insulin related gene? Y, Yes; N, No |
|--------------|----------------------------------------|----------------------------------------------|----------------------------------------|-------------------------------------|
| AURKAPS1     | 0.177142643                            | N                                            | 0                                      | N                                   |
| CCNB2        | 0.177142643                            | N                                            | 20                                     | N                                   |
| CDH11        | 0.177142643                            | N                                            | 2                                      | N                                   |
| CEP97        | 0.177142643                            | N                                            | 0                                      | N                                   |
| CNOT4        | 0.177142643                            | N                                            | 0                                      | N                                   |
| ECT2         | 0.177142643                            | N                                            | 3                                      | N                                   |
| FBLN5        | 0.177142643                            | N                                            | 3                                      | N                                   |
| FLJ37453     | 0.177142643                            | N                                            | 0                                      | N                                   |
| GCH1         | 0.177142643                            | N                                            | 2                                      | N                                   |
| GPSM2        | 0.177142643                            | N                                            | 1                                      | N                                   |
| GSTM2        | 0.177142643                            | N                                            | 1                                      | N                                   |
| HMGB1P24     | 0.177142643                            | N                                            | 0                                      | N                                   |
| IL6ST        | 0.177142643                            | N                                            | 18                                     | N                                   |
| KIF14        | 0.177142643                            | N                                            | 1                                      | N                                   |
| LAMC1        | 0.177142643                            | N                                            | 4                                      | N                                   |
| LAMP1        | 0.177142643                            | N                                            | 10                                     | N                                   |
| LINC00968    | 0.177142643                            | N                                            | 0                                      | N                                   |
| MCEE         | 0.177142643                            | N                                            | 2                                      | N                                   |
| MTCO1P12     | 0.177142643                            | N                                            | 0                                      | N                                   |
| NACAP1       | 0.177142643                            | N                                            | 0                                      | N                                   |
| NEK2         | 0.177142643                            | N                                            | 3                                      | N                                   |
| PCDH18       | 0.177142643                            | N                                            | 0                                      | N                                   |
| PRSS12       | 0.177142643                            | N                                            | 0                                      | N                                   |
| RANP4        | 0.177142643                            | N                                            | 1                                      | N                                   |
| S1PR5        | 0.177142643                            | N                                            | 1                                      | N                                   |
| SEL1L        | 0.177142643                            | N                                            | 9                                      | N                                   |
| SLC27A6      | 0.177142643                            | N                                            | 5                                      | N                                   |
| SNTN         | 0.177142643                            | N                                            | 0                                      | N                                   |
| TACC3        | 0.177142643                            | N                                            | 2                                      | N                                   |
| TBCEL        | 0.177142643                            | N                                            | 0                                      | N                                   |
| TRIM59       | 0.177142643                            | N                                            | 0                                      | N                                   |
| TTC3P1       | 0.177142643                            | N                                            | 0                                      | N                                   |
| UBE2C        | 0.177142643                            | N                                            | 3                                      | N                                   |
| UGP2         | 0.177142643                            | N                                            | 1                                      | N                                   |
| ZC3H12B      | 0.177142643                            | N                                            | 0                                      | N                                   |
| ZNF781       | 0.177142643                            | N                                            | 0                                      | N                                   |
| AC068790.9   | 0.177663203                            | N                                            | 0                                      | N                                   |
| PDGFA        | 0.17807214                             | N                                            | 15                                     | N                                   |
| AC092910.3   | 0.178129483                            | N                                            | 0                                      | N                                   |
| ASNS         | 0.178129483                            | N                                            | 2                                      | N                                   |
| CAP2         | 0.178129483                            | N                                            | 2                                      | N                                   |
| KRT15        | 0.178129483                            | N                                            | 3                                      | N                                   |
| PIGPP3       | 0.178129483                            | N                                            | 0                                      | N                                   |
| PLPBP        | 0.178129483                            | N                                            | 0                                      | N                                   |
| PTTG3P       | 0.178129483                            | N                                            | 0                                      | N                                   |
| STAG3        | 0.178129483                            | N                                            | 1                                      | N                                   |
| TRAPPC3L     | 0.179693302                            | N                                            | 0                                      | N                                   |
| DTWD1        | 0.18055817                             | N                                            | 0                                      | N                                   |
| LAS1L        | 0.180562435                            | N                                            | 0                                      | N                                   |
| AC004980.1   | 0.180750216                            | N                                            | 0                                      | N                                   |
| AC020633.1   | 0.180750216                            | N                                            | 0                                      | N                                   |
| ADGRL2       | 0.180750216                            | N                                            | 0                                      | N                                   |
| CFAP70       | 0.180750216                            | N                                            | 0                                      | N                                   |
| DYM          | 0.180750216                            | N                                            | 4                                      | N                                   |
| ANKRD17      | 0.180827374                            | N                                            | 0                                      | N                                   |
| ATXN1        | 0.180908904                            | N                                            | 8                                      | N                                   |
| CDKN2AIPNLP1 | 0.181013289                            | N                                            | 0                                      | N                                   |
| EBLN3P       | 0.181040259                            | N                                            | 0                                      | N                                   |
| RHBDD1       | 0.181159439                            | N                                            | 0                                      | N                                   |
| THBS2        | 0.181159439                            | N                                            | 4                                      | N                                   |
| AC011497.2   | 0.181518053                            | N                                            | 0                                      | N                                   |
| AC073046.1   | 0.181518053                            | N                                            | 0                                      | N                                   |
| AC107463.1   | 0.181518053                            | N                                            | 0                                      | N                                   |
| AL158151.1   | 0.181518053                            | N                                            | 0                                      | N                                   |
| BORA         | 0.181518053                            | N                                            | 39                                     | N                                   |
| FAM228B      | 0.181518053                            | N                                            | 0                                      | N                                   |

| Gene symbols | FDR (differential expression analysis) | Differentially expressed gene? Y, Yes; N, No | Number of insulin related publications | Insulin related gene? Y, Yes; N, No |
|--------------|----------------------------------------|----------------------------------------------|----------------------------------------|-------------------------------------|
| MIR99AHG     | 0.181518053                            | N                                            | 0                                      | N                                   |
| PDE9A        | 0.181518053                            | N                                            | 1                                      | N                                   |
| RNF217       | 0.181518053                            | N                                            | 0                                      | N                                   |
| C20orf194    | 0.181559801                            | N                                            | 0                                      | N                                   |
| C1orf174     | 0.181831555                            | N                                            | 0                                      | N                                   |
| CCNB1        | 0.182299362                            | N                                            | 89                                     | N                                   |
| AL359195.2   | 0.183329964                            | N                                            | 0                                      | N                                   |
| AP001458.2   | 0.183582778                            | N                                            | 0                                      | N                                   |
| EGF          | 0.183582778                            | N                                            | 1000                                   | Y                                   |
| KLHL6        | 0.183582778                            | N                                            | 1                                      | N                                   |
| RILPL1       | 0.183582778                            | N                                            | 0                                      | N                                   |
| CD36         | 0.183984886                            | N                                            | 808                                    | Y                                   |
| H2AFV        | 0.18633501                             | N                                            | 0                                      | N                                   |
| HYDIN        | 0.18633501                             | N                                            | 0                                      | N                                   |
| AC006483.1   | 0.186473731                            | N                                            | 0                                      | N                                   |
| FAM162B      | 0.186473731                            | N                                            | 0                                      | N                                   |
| AC098679.1   | 0.186726831                            | N                                            | 0                                      | N                                   |
| EMC9         | 0.186726831                            | N                                            | 0                                      | N                                   |
| ZNF33B       | 0.187300741                            | N                                            | 0                                      | N                                   |
| AC005261.4   | 0.187767955                            | N                                            | 0                                      | N                                   |
| ANAPC7       | 0.187767955                            | N                                            | 0                                      | N                                   |
| ATP8B4       | 0.187767955                            | N                                            | 1                                      | N                                   |
| BX890604.1   | 0.187767955                            | N                                            | 0                                      | N                                   |
| DPY19L2P2    | 0.187767955                            | N                                            | 0                                      | N                                   |
| ESPL1        | 0.187767955                            | N                                            | 1                                      | N                                   |
| ITGA11       | 0.187767955                            | N                                            | 2                                      | N                                   |
| RAET1E-AS1   | 0.187767955                            | N                                            | 0                                      | N                                   |
| TK1          | 0.187767955                            | N                                            | 0                                      | N                                   |
| ZBED6        | 0.188784462                            | N                                            | 13                                     | N                                   |
| AC145124.1   | 0.189374659                            | N                                            | 0                                      | N                                   |
| DDX39A       | 0.189374659                            | N                                            | 0                                      | N                                   |
| CHAC1        | 0.189647045                            | N                                            | 3                                      | N                                   |
| AP003352.1   | 0.190168359                            | N                                            | 0                                      | N                                   |
| BRD8         | 0.190168359                            | N                                            | 0                                      | N                                   |
| C8orf88      | 0.190168359                            | N                                            | 0                                      | N                                   |
| CCNB2P1      | 0.190168359                            | N                                            | 0                                      | N                                   |
| HNRNPH1P3    | 0.190168359                            | N                                            | 0                                      | N                                   |
| KIF23        | 0.190168359                            | N                                            | 0                                      | N                                   |
| OSBPL2       | 0.190168359                            | N                                            | 0                                      | N                                   |
| PXK          | 0.190168359                            | N                                            | 0                                      | N                                   |
| RAB38        | 0.190168359                            | N                                            | 0                                      | N                                   |
| ZNF582       | 0.190168359                            | N                                            | 0                                      | N                                   |
| BUB1B        | 0.190213117                            | N                                            | 4                                      | N                                   |
| HAUS1P1      | 0.191614201                            | N                                            | 0                                      | N                                   |
| RABEP1       | 0.191614201                            | N                                            | 0                                      | N                                   |
| CKAP2        | 0.191992694                            | N                                            | 0                                      | N                                   |
| CXorf57      | 0.191992694                            | N                                            | 0                                      | N                                   |
| HERC2P10     | 0.191992694                            | N                                            | 0                                      | N                                   |
| FLRT2        | 0.192915971                            | N                                            | 1                                      | N                                   |
| TIAL1        | 0.192915971                            | N                                            | 0                                      | N                                   |
| ABCC13       | 0.193431619                            | N                                            | 0                                      | N                                   |
| AC005618.1   | 0.193431619                            | N                                            | 0                                      | N                                   |
| AC008555.8   | 0.193431619                            | N                                            | 0                                      | N                                   |
| AC022400.8   | 0.193431619                            | N                                            | 0                                      | N                                   |
| AGL          | 0.193431619                            | N                                            | 19                                     | N                                   |
| AL445472.1   | 0.193431619                            | N                                            | 0                                      | N                                   |
| CAMK1        | 0.193431619                            | N                                            | 6                                      | N                                   |
| CDKN2D       | 0.193431619                            | N                                            | 1                                      | N                                   |
| CENPE        | 0.193431619                            | N                                            | 0                                      | N                                   |
| CEP55        | 0.193431619                            | N                                            | 0                                      | N                                   |
| CTC-205M6.5  | 0.193431619                            | N                                            | 0                                      | N                                   |
| ERV3-1       | 0.193431619                            | N                                            | 0                                      | N                                   |
| KNL1         | 0.193431619                            | N                                            | 0                                      | N                                   |
| LINC01277    | 0.193431619                            | N                                            | 0                                      | N                                   |
| NCOA1        | 0.193431619                            | N                                            | 19                                     | N                                   |
| RAB40B       | 0.193431619                            | N                                            | 0                                      | N                                   |

| Gene symbols | FDR (differential expression analysis) | Differentially expressed gene? Y, Yes; N, No | Number of insulin related publications | Insulin related gene? Y, Yes; N, No |
|--------------|----------------------------------------|----------------------------------------------|----------------------------------------|-------------------------------------|
| SCAF11       | 0.193431619                            | N                                            | 0                                      | N                                   |
| SLC31A1      | 0.193431619                            | N                                            | 5                                      | N                                   |
| SPPL2A       | 0.193431619                            | N                                            | 0                                      | N                                   |
| TCHP         | 0.193431619                            | N                                            | 0                                      | N                                   |
| TEX2         | 0.193431619                            | N                                            | 0                                      | N                                   |
| TIMM29       | 0.193431619                            | N                                            | 0                                      | N                                   |
| ABALON       | 0.19458519                             | N                                            | 4                                      | N                                   |
| AC104791.2   | 0.194652005                            | N                                            | 0                                      | N                                   |
| CCNI         | 0.194652005                            | N                                            | 1                                      | N                                   |
| ABCA1        | 0.195041854                            | N                                            | 202                                    | Y                                   |
| AC018766.4   | 0.195041854                            | N                                            | 0                                      | N                                   |
| AC106886.4   | 0.195041854                            | N                                            | 0                                      | N                                   |
| CDKN2B       | 0.195041854                            | N                                            | 48                                     | N                                   |
| COL11A2      | 0.195041854                            | N                                            | 2                                      | N                                   |
| DTYMK        | 0.195041854                            | N                                            | 0                                      | N                                   |
| FAM219B      | 0.195041854                            | N                                            | 0                                      | N                                   |
| FBF1         | 0.195041854                            | N                                            | 0                                      | N                                   |
| FLOT1        | 0.195041854                            | N                                            | 2                                      | N                                   |
| GABARAP      | 0.195041854                            | N                                            | 7                                      | N                                   |
| GCNT3        | 0.195041854                            | N                                            | 0                                      | N                                   |
| HRNR         | 0.195041854                            | N                                            | 0                                      | N                                   |
| MLH1         | 0.195041854                            | N                                            | 21                                     | N                                   |
| PCDH9        | 0.195041854                            | N                                            | 1                                      | N                                   |
| RALGAPB      | 0.195041854                            | N                                            | 1                                      | N                                   |
| RHOBTB1      | 0.195041854                            | N                                            | 0                                      | N                                   |
| STK31        | 0.195041854                            | N                                            | 0                                      | N                                   |
| ZMYND10      | 0.195041854                            | N                                            | 0                                      | N                                   |
| ZNF25        | 0.195041854                            | N                                            | 0                                      | N                                   |
| ZNF697       | 0.195041854                            | N                                            | 0                                      | N                                   |
| PLPP3        | 0.195463287                            | N                                            | 1                                      | N                                   |
| TSIX         | 0.195463287                            | N                                            | 0                                      | N                                   |
| PCDHB14      | 0.195736536                            | N                                            | 0                                      | N                                   |
| CHMP1B2P     | 0.196825716                            | N                                            | 0                                      | N                                   |
| SAE1         | 0.196850673                            | N                                            | 0                                      | N                                   |
| SLC39A2      | 0.196935456                            | N                                            | 1                                      | N                                   |
| AC010654.1   | 0.198470697                            | N                                            | 0                                      | N                                   |
| AL359510.2   | 0.198470697                            | N                                            | 0                                      | N                                   |
| B9D2         | 0.198470697                            | N                                            | 0                                      | N                                   |
| CFTR         | 0.198470697                            | N                                            | 125                                    | Y                                   |
| PTTG1        | 0.198470697                            | N                                            | 4                                      | N                                   |
| RGS11        | 0.198470697                            | N                                            | 0                                      | N                                   |
| STON2        | 0.198470697                            | N                                            | 0                                      | N                                   |
| THRB-AS1     | 0.198470697                            | N                                            | 0                                      | N                                   |
| TTN          | 0.198470697                            | N                                            | 10                                     | N                                   |
| GRIA2        | 0.198668805                            | N                                            | 1                                      | N                                   |
| TCF21        | 0.199308013                            | N                                            | 4                                      | N                                   |
| TMEM87B      | 0.199424385                            | N                                            | 0                                      | N                                   |
| HIRIP3       | 0.199943989                            | N                                            | 0                                      | N                                   |
| WDR26        | 0.199943989                            | N                                            | 1                                      | N                                   |
| AC019080.1   | 0.201225821                            | N                                            | 0                                      | N                                   |
| PNRC1        | 0.201225821                            | N                                            | 0                                      | N                                   |
| KIF11        | 0.2013565                              | N                                            | 9                                      | N                                   |
| USP34        | 0.2013565                              | N                                            | 0                                      | N                                   |
| EPHX1        | 0.201945084                            | N                                            | 48                                     | N                                   |
| AC010533.1   | 0.202541269                            | N                                            | 0                                      | N                                   |
| AC018413.1   | 0.202541269                            | N                                            | 0                                      | N                                   |
| AC067838.1   | 0.202541269                            | N                                            | 0                                      | N                                   |
| CTNBL1       | 0.202541269                            | N                                            | 1                                      | N                                   |
| FRMPD2       | 0.202541269                            | N                                            | 0                                      | N                                   |
| FRS2         | 0.202541269                            | N                                            | 10                                     | N                                   |
| KPNA2P1      | 0.202541269                            | N                                            | 0                                      | N                                   |
| LINC01933    | 0.202541269                            | N                                            | 0                                      | N                                   |
| MAP1LC3C     | 0.202541269                            | N                                            | 0                                      | N                                   |
| NOL12        | 0.202541269                            | N                                            | 0                                      | N                                   |
| PLEKHM3      | 0.202541269                            | N                                            | 0                                      | N                                   |
| SEC24D       | 0.202541269                            | N                                            | 0                                      | N                                   |

| Gene symbols  | FDR (differential expression analysis) | Differentially expressed gene? Y, Yes; N, No | Number of insulin related publications | Insulin related gene? Y, Yes; N, No |
|---------------|----------------------------------------|----------------------------------------------|----------------------------------------|-------------------------------------|
| SNRPD3        | 0.202541269                            | N                                            | 0                                      | N                                   |
| ST3GAL6       | 0.202541269                            | N                                            | 1                                      | N                                   |
| TULP4         | 0.202541269                            | N                                            | 0                                      | N                                   |
| USP53         | 0.202541269                            | N                                            | 1                                      | N                                   |
| VPS13B        | 0.202541269                            | N                                            | 1                                      | N                                   |
| WDR87         | 0.202541269                            | N                                            | 0                                      | N                                   |
| ZNF83         | 0.202541269                            | N                                            | 0                                      | N                                   |
| EFCAB6        | 0.202613616                            | N                                            | 0                                      | N                                   |
| AC007495.1    | 0.202943516                            | N                                            | 0                                      | N                                   |
| AC013652.1    | 0.202943516                            | N                                            | 0                                      | N                                   |
| AC016705.2    | 0.202943516                            | N                                            | 0                                      | N                                   |
| DARS2         | 0.202943516                            | N                                            | 0                                      | N                                   |
| G2E3          | 0.202943516                            | N                                            | 0                                      | N                                   |
| GLOD4         | 0.202943516                            | N                                            | 0                                      | N                                   |
| NUP88         | 0.202943516                            | N                                            | 0                                      | N                                   |
| OIP5          | 0.202943516                            | N                                            | 0                                      | N                                   |
| PDLIM3        | 0.202943516                            | N                                            | 1                                      | N                                   |
| PPIL1P1       | 0.202943516                            | N                                            | 0                                      | N                                   |
| PPP1R15B      | 0.202943516                            | N                                            | 3                                      | N                                   |
| RABGAP1L      | 0.202943516                            | N                                            | 0                                      | N                                   |
| SLC2A3P2      | 0.202943516                            | N                                            | 0                                      | N                                   |
| TBX19         | 0.202943516                            | N                                            | 2                                      | N                                   |
| TMEM107       | 0.202943516                            | N                                            | 0                                      | N                                   |
| TMEM260       | 0.202943516                            | N                                            | 0                                      | N                                   |
| ADM5          | 0.203853769                            | N                                            | 0                                      | N                                   |
| RBBP7         | 0.203953179                            | N                                            | 1                                      | N                                   |
| CTD-2554C21.3 | 0.204222877                            | N                                            | 0                                      | N                                   |
| LDB2          | 0.204222877                            | N                                            | 4                                      | N                                   |
| RMI2          | 0.204222877                            | N                                            | 1                                      | N                                   |
| KIF4A         | 0.204414225                            | N                                            | 2                                      | N                                   |
| AC091607.1    | 0.204568314                            | N                                            | 0                                      | N                                   |
| AL121768.1    | 0.204568314                            | N                                            | 0                                      | N                                   |
| ARIH1         | 0.204568314                            | N                                            | 1                                      | N                                   |
| ERBB3         | 0.204568314                            | N                                            | 77                                     | N                                   |
| LRRC75A       | 0.204568314                            | N                                            | 0                                      | N                                   |
| SP6           | 0.204568314                            | N                                            | 16                                     | N                                   |
| ZMAT3         | 0.204568314                            | N                                            | 0                                      | N                                   |
| COA1          | 0.204713357                            | N                                            | 0                                      | N                                   |
| AC005899.7    | 0.204862706                            | N                                            | 0                                      | N                                   |
| AL162231.2    | 0.204862706                            | N                                            | 0                                      | N                                   |
| AMIGO1        | 0.204862706                            | N                                            | 0                                      | N                                   |
| ATP2A1-AS1    | 0.204862706                            | N                                            | 0                                      | N                                   |
| C19orf12      | 0.204862706                            | N                                            | 0                                      | N                                   |
| CACNA1D       | 0.204862706                            | N                                            | 20                                     | N                                   |
| CPD           | 0.204862706                            | N                                            | 71                                     | N                                   |
| CTIF          | 0.204862706                            | N                                            | 1                                      | N                                   |
| LMLN          | 0.204862706                            | N                                            | 0                                      | N                                   |
| NIF3L1        | 0.204862706                            | N                                            | 0                                      | N                                   |
| PARPBP        | 0.204862706                            | N                                            | 0                                      | N                                   |
| TAB2          | 0.204862706                            | N                                            | 3                                      | N                                   |
| UBL7-AS1      | 0.204862706                            | N                                            | 0                                      | N                                   |
| ZNF204P       | 0.204862706                            | N                                            | 0                                      | N                                   |
| AC008536.3    | 0.205139543                            | N                                            | 0                                      | N                                   |
| DCAF10        | 0.205139543                            | N                                            | 0                                      | N                                   |
| MEA1          | 0.205139543                            | N                                            | 0                                      | N                                   |
| ZC3H11A       | 0.205420904                            | N                                            | 3                                      | N                                   |
| DENND4A       | 0.206030137                            | N                                            | 0                                      | N                                   |
| EFNB3         | 0.206787686                            | N                                            | 2                                      | N                                   |
| PCDHGA2       | 0.206787686                            | N                                            | 0                                      | N                                   |
| AC006971.1    | 0.207522397                            | N                                            | 0                                      | N                                   |
| ZNF571        | 0.207522397                            | N                                            | 0                                      | N                                   |
| SEC24B        | 0.207570102                            | N                                            | 0                                      | N                                   |
| ANGPT1        | 0.207776347                            | N                                            | 24                                     | N                                   |
| NFASC         | 0.207977823                            | N                                            | 2                                      | N                                   |
| TMED10        | 0.208180597                            | N                                            | 1                                      | N                                   |
| ZKSCAN5       | 0.208525426                            | N                                            | 1                                      | N                                   |



| Gene symbols    | FDR (differential expression analysis) | Differentially expressed gene? Y, Yes; N, No | Number of insulin related publications | Insulin related gene? Y, Yes; N, No |
|-----------------|----------------------------------------|----------------------------------------------|----------------------------------------|-------------------------------------|
| MRPL51          | 0.208695751                            | N                                            | 0                                      | N                                   |
| KLRG2           | 0.209032345                            | N                                            | 0                                      | N                                   |
| AMPH            | 0.209632128                            | N                                            | 16                                     | N                                   |
| CACNA1C         | 0.209632128                            | N                                            | 20                                     | N                                   |
| CWF19L1         | 0.209632128                            | N                                            | 0                                      | N                                   |
| DUSP15          | 0.209632128                            | N                                            | 0                                      | N                                   |
| HADHB           | 0.209632128                            | N                                            | 8                                      | N                                   |
| LIN28B          | 0.209632128                            | N                                            | 16                                     | N                                   |
| PLCH2           | 0.209632128                            | N                                            | 0                                      | N                                   |
| SCARB2          | 0.209632128                            | N                                            | 2                                      | N                                   |
| TMEM237         | 0.209632128                            | N                                            | 0                                      | N                                   |
| LINC01503       | 0.209632552                            | N                                            | 0                                      | N                                   |
| NCAPD2P1        | 0.209632552                            | N                                            | 0                                      | N                                   |
| SERP1           | 0.209632552                            | N                                            | 1                                      | N                                   |
| AC046134.1      | 0.21015572                             | N                                            | 0                                      | N                                   |
| AC078850.1      | 0.21015572                             | N                                            | 0                                      | N                                   |
| AL591895.1      | 0.21015572                             | N                                            | 0                                      | N                                   |
| DEPDC1B         | 0.21015572                             | N                                            | 0                                      | N                                   |
| EXOC6B          | 0.21015572                             | N                                            | 1                                      | N                                   |
| ZFP2            | 0.21015572                             | N                                            | 0                                      | N                                   |
| ZNF18           | 0.21015572                             | N                                            | 0                                      | N                                   |
| ZNF398          | 0.21015572                             | N                                            | 0                                      | N                                   |
| AC005562.1      | 0.210405025                            | N                                            | 0                                      | N                                   |
| LINC00202-1     | 0.210405025                            | N                                            | 0                                      | N                                   |
| TCAF1           | 0.210405025                            | N                                            | 0                                      | N                                   |
| CENPX           | 0.210980193                            | N                                            | 1                                      | N                                   |
| SLC25A5-AS1     | 0.210980193                            | N                                            | 0                                      | N                                   |
| UHRF1BP1        | 0.210980193                            | N                                            | 1                                      | N                                   |
| AL592437.2      | 0.211226626                            | N                                            | 0                                      | N                                   |
| GNA14           | 0.211226626                            | N                                            | 0                                      | N                                   |
| KIF20B          | 0.211226626                            | N                                            | 2                                      | N                                   |
| MAP4            | 0.211226626                            | N                                            | 2                                      | N                                   |
| ZNF383          | 0.211226626                            | N                                            | 0                                      | N                                   |
| RNF103          | 0.211269402                            | N                                            | 0                                      | N                                   |
| ADAM20          | 0.211520712                            | N                                            | 0                                      | N                                   |
| CLN5            | 0.211520712                            | N                                            | 1                                      | N                                   |
| EIF3F           | 0.211520712                            | N                                            | 2                                      | N                                   |
| LTK             | 0.211520712                            | N                                            | 21                                     | N                                   |
| PEX12           | 0.211520712                            | N                                            | 0                                      | N                                   |
| SLITRK6         | 0.211520712                            | N                                            | 0                                      | N                                   |
| TROAP           | 0.211520712                            | N                                            | 0                                      | N                                   |
| AC010200.1      | 0.211584261                            | N                                            | 0                                      | N                                   |
| SSH2            | 0.211584261                            | N                                            | 0                                      | N                                   |
| PURA            | 0.212093823                            | N                                            | 5                                      | N                                   |
| SLC22A18AS      | 0.212093823                            | N                                            | 0                                      | N                                   |
| PARD3B          | 0.21228531                             | N                                            | 0                                      | N                                   |
| RPS4XP13        | 0.21228531                             | N                                            | 0                                      | N                                   |
| SIRPA           | 0.21228531                             | N                                            | 21                                     | N                                   |
| AC005261.1      | 0.212565141                            | N                                            | 0                                      | N                                   |
| ACVR1           | 0.212565141                            | N                                            | 1                                      | N                                   |
| MXI1            | 0.212565141                            | N                                            | 2                                      | N                                   |
| PRDM2           | 0.212565141                            | N                                            | 3                                      | N                                   |
| PRPS2           | 0.212565141                            | N                                            | 0                                      | N                                   |
| SERBP1P1        | 0.212565141                            | N                                            | 0                                      | N                                   |
| WASF1           | 0.212565141                            | N                                            | 2                                      | N                                   |
| HERC1           | 0.212927886                            | N                                            | 0                                      | N                                   |
| C12orf43        | 0.213083978                            | N                                            | 0                                      | N                                   |
| COG3            | 0.213083978                            | N                                            | 0                                      | N                                   |
| CPXM2           | 0.213083978                            | N                                            | 1                                      | N                                   |
| LL22NC03-22D1.1 | 0.213083978                            | N                                            | 0                                      | N                                   |
| MTMR3           | 0.213083978                            | N                                            | 0                                      | N                                   |
| PAX8            | 0.213083978                            | N                                            | 24                                     | N                                   |
| PLXDC2          | 0.213083978                            | N                                            | 1                                      | N                                   |
| TPX2            | 0.213083978                            | N                                            | 5                                      | N                                   |
| USP18           | 0.213083978                            | N                                            | 6                                      | N                                   |
| ZNHIT6          | 0.213083978                            | N                                            | 0                                      | N                                   |

| Gene symbols | FDR (differential expression analysis) | Differentially expressed gene? Y, Yes; N, No | Number of insulin related publications | Insulin related gene? Y, Yes; N, No |
|--------------|----------------------------------------|----------------------------------------------|----------------------------------------|-------------------------------------|
| AC104825.2   | 0.213103817                            | N                                            | 0                                      | N                                   |
| CDRT4        | 0.213103817                            | N                                            | 0                                      | N                                   |
| FMO2         | 0.213103817                            | N                                            | 9                                      | N                                   |
| MIS18BP1     | 0.213103817                            | N                                            | 0                                      | N                                   |
| NBDY         | 0.213103817                            | N                                            | 0                                      | N                                   |
| NCAPD2       | 0.213103817                            | N                                            | 0                                      | N                                   |
| NPIPB2       | 0.213103817                            | N                                            | 0                                      | N                                   |
| PLPPR1       | 0.213103817                            | N                                            | 0                                      | N                                   |
| AC073857.1   | 0.213145671                            | N                                            | 0                                      | N                                   |
| AC125437.1   | 0.213145671                            | N                                            | 0                                      | N                                   |
| SETD7        | 0.213145671                            | N                                            | 3                                      | N                                   |
| AC239809.3   | 0.214031604                            | N                                            | 0                                      | N                                   |
| TMPOP2       | 0.214125741                            | N                                            | 0                                      | N                                   |
| AC097381.1   | 0.214182118                            | N                                            | 0                                      | N                                   |
| AC117489.1   | 0.214182118                            | N                                            | 0                                      | N                                   |
| AL132777.1   | 0.214182118                            | N                                            | 0                                      | N                                   |
| AP001094.2   | 0.214182118                            | N                                            | 0                                      | N                                   |
| CNTRL        | 0.214182118                            | N                                            | 2                                      | N                                   |
| DBF4         | 0.214182118                            | N                                            | 1                                      | N                                   |
| DPY19L2      | 0.214182118                            | N                                            | 0                                      | N                                   |
| KPNA2        | 0.214182118                            | N                                            | 2                                      | N                                   |
| NDC80        | 0.214182118                            | N                                            | 1                                      | N                                   |
| PFKFB2       | 0.214182118                            | N                                            | 8                                      | N                                   |
| SERPINB7     | 0.214182118                            | N                                            | 2                                      | N                                   |
| SH3GLB1      | 0.214182118                            | N                                            | 1                                      | N                                   |
| TMEM121B     | 0.214182118                            | N                                            | 0                                      | N                                   |
| TTK          | 0.214182118                            | N                                            | 12                                     | N                                   |
| ZNF177       | 0.214182118                            | N                                            | 0                                      | N                                   |
| AC005911.1   | 0.214780987                            | N                                            | 0                                      | N                                   |
| AL139130.1   | 0.214780987                            | N                                            | 0                                      | N                                   |
| ANP32E       | 0.214780987                            | N                                            | 0                                      | N                                   |
| CDNF         | 0.214780987                            | N                                            | 0                                      | N                                   |
| EEF1A1       | 0.214780987                            | N                                            | 7                                      | N                                   |
| GPR155       | 0.214780987                            | N                                            | 1                                      | N                                   |
| LATS1        | 0.214780987                            | N                                            | 5                                      | N                                   |
| LINC01847    | 0.214780987                            | N                                            | 0                                      | N                                   |
| NMRK1        | 0.214780987                            | N                                            | 2                                      | N                                   |
| PLCB1        | 0.214780987                            | N                                            | 18                                     | N                                   |
| RND3         | 0.214780987                            | N                                            | 6                                      | N                                   |
| TBC1D3P5     | 0.214780987                            | N                                            | 0                                      | N                                   |
| TDP1         | 0.214780987                            | N                                            | 0                                      | N                                   |
| TFCP2L1      | 0.214780987                            | N                                            | 0                                      | N                                   |
| ZFYVE9P1     | 0.214780987                            | N                                            | 0                                      | N                                   |
| ZNF192P1     | 0.214780987                            | N                                            | 0                                      | N                                   |
| ZNF846       | 0.214780987                            | N                                            | 0                                      | N                                   |
| AC093677.2   | 0.215118744                            | N                                            | 0                                      | N                                   |
| PSMC3        | 0.215258975                            | N                                            | 0                                      | N                                   |
| SRSF8        | 0.215258975                            | N                                            | 0                                      | N                                   |
| AC091544.3   | 0.21531195                             | N                                            | 0                                      | N                                   |
| SSBP2        | 0.21531195                             | N                                            | 0                                      | N                                   |
| LINC01224    | 0.215419874                            | N                                            | 0                                      | N                                   |
| AARS2        | 0.215564248                            | N                                            | 0                                      | N                                   |
| AL121985.1   | 0.215564248                            | N                                            | 0                                      | N                                   |
| CCDC18       | 0.215564248                            | N                                            | 0                                      | N                                   |
| DCX          | 0.215564248                            | N                                            | 25                                     | N                                   |
| ITGB1BP1     | 0.215564248                            | N                                            | 1                                      | N                                   |
| KDM1B        | 0.215564248                            | N                                            | 1                                      | N                                   |
| KIFAP3       | 0.215564248                            | N                                            | 1                                      | N                                   |
| NAV2-AS2     | 0.215564248                            | N                                            | 0                                      | N                                   |
| SMC4         | 0.215564248                            | N                                            | 0                                      | N                                   |
| TMEM74       | 0.215564248                            | N                                            | 0                                      | N                                   |
| WIPF1        | 0.215564248                            | N                                            | 1                                      | N                                   |
| ERBIN        | 0.215666621                            | N                                            | 0                                      | N                                   |
| TLE4         | 0.215666621                            | N                                            | 2                                      | N                                   |
| COL19A1      | 0.216019646                            | N                                            | 0                                      | N                                   |
| GATS         | 0.216103373                            | N                                            | 0                                      | N                                   |

| Gene symbols | FDR (differential expression analysis) | Differentially expressed gene? Y, Yes; N, No | Number of insulin related publications | Insulin related gene? Y, Yes; N, No |
|--------------|----------------------------------------|----------------------------------------------|----------------------------------------|-------------------------------------|
| TFDP2        | 0.216103373                            | N                                            | 1                                      | N                                   |
| TMEM39A      | 0.216103373                            | N                                            | 0                                      | N                                   |
| SLC35E1      | 0.216164737                            | N                                            | 0                                      | N                                   |
| SBF2-AS1     | 0.216195239                            | N                                            | 0                                      | N                                   |
| AC009704.2   | 0.216355586                            | N                                            | 0                                      | N                                   |
| CECR2        | 0.217007361                            | N                                            | 0                                      | N                                   |
| PDAP1        | 0.217207235                            | N                                            | 1                                      | N                                   |
| AL137159.1   | 0.217514978                            | N                                            | 0                                      | N                                   |
| CENPL        | 0.217514978                            | N                                            | 0                                      | N                                   |
| FBNP1L       | 0.217514978                            | N                                            | 1                                      | N                                   |
| LRP6         | 0.217514978                            | N                                            | 28                                     | N                                   |
| NSL1         | 0.217514978                            | N                                            | 0                                      | N                                   |
| SPATA9       | 0.217514978                            | N                                            | 0                                      | N                                   |
| SMC2         | 0.217621026                            | N                                            | 0                                      | N                                   |
| CYYR1-AS1    | 0.217839766                            | N                                            | 0                                      | N                                   |
| GABBR2       | 0.217839766                            | N                                            | 1                                      | N                                   |
| HCG17        | 0.217839766                            | N                                            | 0                                      | N                                   |
| KLF3         | 0.217839766                            | N                                            | 3                                      | N                                   |
| MAP1LC3B     | 0.217839766                            | N                                            | 13                                     | N                                   |
| PAPPA        | 0.217839766                            | N                                            | 41                                     | N                                   |
| THRB         | 0.217839766                            | N                                            | 8                                      | N                                   |
| ZNF830       | 0.217839766                            | N                                            | 0                                      | N                                   |
| CCSER2       | 0.218175007                            | N                                            | 0                                      | N                                   |
| NCAPG2       | 0.218175007                            | N                                            | 0                                      | N                                   |
| REV3L        | 0.218175007                            | N                                            | 0                                      | N                                   |
| CCDC68       | 0.218353651                            | N                                            | 0                                      | N                                   |
| EPAS1        | 0.218353651                            | N                                            | 6                                      | N                                   |
| PCDHB12      | 0.218353651                            | N                                            | 0                                      | N                                   |
| DHX9         | 0.218479636                            | N                                            | 1                                      | N                                   |
| PARP6        | 0.219425203                            | N                                            | 0                                      | N                                   |
| PDK4         | 0.219425203                            | N                                            | 182                                    | Y                                   |
| AC008764.9   | 0.219541179                            | N                                            | 0                                      | N                                   |
| PTH2R        | 0.219541179                            | N                                            | 0                                      | N                                   |
| RPSA         | 0.219541179                            | N                                            | 1                                      | N                                   |
| AC004066.1   | 0.219718692                            | N                                            | 0                                      | N                                   |
| AL132640.2   | 0.219718692                            | N                                            | 0                                      | N                                   |
| NSD2         | 0.219718692                            | N                                            | 2                                      | N                                   |
| AL356000.1   | 0.220394845                            | N                                            | 0                                      | N                                   |
| BABAM2       | 0.220394845                            | N                                            | 0                                      | N                                   |
| CASC10       | 0.220394845                            | N                                            | 0                                      | N                                   |
| KIF15        | 0.220394845                            | N                                            | 0                                      | N                                   |
| RPS6KA1      | 0.220394845                            | N                                            | 82                                     | N                                   |
| AC009754.1   | 0.220675477                            | N                                            | 0                                      | N                                   |
| PBK          | 0.220971614                            | N                                            | 10                                     | N                                   |
| LRTOMT       | 0.221203361                            | N                                            | 0                                      | N                                   |
| AC005865.1   | 0.22126955                             | N                                            | 0                                      | N                                   |
| MARCH9       | 0.2213454                              | N                                            | 0                                      | N                                   |
| AC018639.1   | 0.2213454                              | N                                            | 0                                      | N                                   |
| AL135999.1   | 0.2213454                              | N                                            | 0                                      | N                                   |
| PROCA1       | 0.2213454                              | N                                            | 0                                      | N                                   |
| KIAA1958     | 0.222459331                            | N                                            | 0                                      | N                                   |
| WFS1         | 0.222459331                            | N                                            | 102                                    | Y                                   |
| AL136309.2   | 0.222796139                            | N                                            | 0                                      | N                                   |
| AL731532.2   | 0.222796139                            | N                                            | 0                                      | N                                   |
| CACYBP       | 0.222796139                            | N                                            | 0                                      | N                                   |
| CCNF         | 0.222796139                            | N                                            | 2                                      | N                                   |
| CDKN3        | 0.222796139                            | N                                            | 1                                      | N                                   |
| ITGB8        | 0.222796139                            | N                                            | 0                                      | N                                   |
| PRCP         | 0.222796139                            | N                                            | 4                                      | N                                   |
| PRPF38AP1    | 0.222796139                            | N                                            | 0                                      | N                                   |
| RCOR3        | 0.222796139                            | N                                            | 0                                      | N                                   |
| RNF150       | 0.222796139                            | N                                            | 0                                      | N                                   |
| SNRNP35      | 0.222796139                            | N                                            | 0                                      | N                                   |
| TRMT112      | 0.222796139                            | N                                            | 1                                      | N                                   |
| TRMU         | 0.222796139                            | N                                            | 0                                      | N                                   |
| JMY          | 0.222940779                            | N                                            | 0                                      | N                                   |

| Gene symbols | FDR (differential expression analysis) | Differentially expressed gene? Y, Yes; N, No | Number of insulin related publications | Insulin related gene? Y, Yes; N, No |
|--------------|----------------------------------------|----------------------------------------------|----------------------------------------|-------------------------------------|
| TRNAU1AP     | 0.223021911                            | N                                            | 0                                      | N                                   |
| PPP2R2B      | 0.223174386                            | N                                            | 1                                      | N                                   |
| SAPCD2P1     | 0.223174386                            | N                                            | 0                                      | N                                   |
| AL117339.4   | 0.223325988                            | N                                            | 0                                      | N                                   |
| ZNF652P1     | 0.223325988                            | N                                            | 0                                      | N                                   |
| SNHG14       | 0.223462369                            | N                                            | 0                                      | N                                   |
| GUSBP5       | 0.223525629                            | N                                            | 0                                      | N                                   |
| HIPK3        | 0.223525629                            | N                                            | 4                                      | N                                   |
| PRR11        | 0.223525629                            | N                                            | 0                                      | N                                   |
| SHCBP1       | 0.223525629                            | N                                            | 0                                      | N                                   |
| ZNF576       | 0.223525629                            | N                                            | 0                                      | N                                   |
| MLLT3        | 0.223567913                            | N                                            | 1                                      | N                                   |
| AC012467.2   | 0.223974531                            | N                                            | 0                                      | N                                   |
| CEP152       | 0.223974531                            | N                                            | 1                                      | N                                   |
| NDC1         | 0.223974531                            | N                                            | 0                                      | N                                   |
| PIH1D1       | 0.223974531                            | N                                            | 0                                      | N                                   |
| PXMP4        | 0.223974531                            | N                                            | 0                                      | N                                   |
| RBMS1P1      | 0.223974531                            | N                                            | 0                                      | N                                   |
| SLC25A27     | 0.223974531                            | N                                            | 5                                      | N                                   |
| ABCA5        | 0.224088221                            | N                                            | 0                                      | N                                   |
| AC007751.1   | 0.224088221                            | N                                            | 0                                      | N                                   |
| AC011632.1   | 0.224088221                            | N                                            | 0                                      | N                                   |
| EFR3A        | 0.224088221                            | N                                            | 0                                      | N                                   |
| EYA2         | 0.224088221                            | N                                            | 1                                      | N                                   |
| FCRLB        | 0.224088221                            | N                                            | 0                                      | N                                   |
| KCNJ12       | 0.224088221                            | N                                            | 0                                      | N                                   |
| PSD3         | 0.224088221                            | N                                            | 0                                      | N                                   |
| RBMS1        | 0.224088221                            | N                                            | 3                                      | N                                   |
| TMPO         | 0.224088221                            | N                                            | 13                                     | N                                   |
| TTF2         | 0.224088221                            | N                                            | 1                                      | N                                   |
| UBE2E2       | 0.224088221                            | N                                            | 6                                      | N                                   |
| XPO1         | 0.224088221                            | N                                            | 3                                      | N                                   |
| ZNF610       | 0.224088221                            | N                                            | 0                                      | N                                   |
| AC007998.4   | 0.22521498                             | N                                            | 0                                      | N                                   |
| ALPK2        | 0.22521498                             | N                                            | 2                                      | N                                   |
| FBXO9        | 0.22521498                             | N                                            | 0                                      | N                                   |
| TRIM16       | 0.22521498                             | N                                            | 1                                      | N                                   |
| C6orf89      | 0.225814113                            | N                                            | 0                                      | N                                   |
| EIF4A1P4     | 0.225814113                            | N                                            | 0                                      | N                                   |
| PGRMC2       | 0.225814113                            | N                                            | 1                                      | N                                   |
| RFTN1        | 0.225814113                            | N                                            | 0                                      | N                                   |
| SEMA5A       | 0.225814113                            | N                                            | 0                                      | N                                   |
| TIMELESS     | 0.225814113                            | N                                            | 3                                      | N                                   |
| AP002469.2   | 0.226599346                            | N                                            | 0                                      | N                                   |
| AC090912.1   | 0.22676587                             | N                                            | 0                                      | N                                   |
| UBE2CP4      | 0.226872122                            | N                                            | 0                                      | N                                   |
| AC048351.1   | 0.226889664                            | N                                            | 0                                      | N                                   |
| ATP10D       | 0.226889664                            | N                                            | 3                                      | N                                   |
| ATP2A2       | 0.226889664                            | N                                            | 34                                     | N                                   |
| DHPS         | 0.226889664                            | N                                            | 4                                      | N                                   |
| IGIP         | 0.226889664                            | N                                            | 4                                      | N                                   |
| KANK1P1      | 0.226889664                            | N                                            | 0                                      | N                                   |
| LINC00958    | 0.226889664                            | N                                            | 0                                      | N                                   |
| NUDT3        | 0.226889664                            | N                                            | 3                                      | N                                   |
| NUF2         | 0.226889664                            | N                                            | 0                                      | N                                   |
| RAB22A       | 0.226889664                            | N                                            | 0                                      | N                                   |
| SCARA3       | 0.226889664                            | N                                            | 0                                      | N                                   |
| SDHAP1       | 0.226889664                            | N                                            | 0                                      | N                                   |
| TOX4         | 0.226889664                            | N                                            | 0                                      | N                                   |
| TLDC2        | 0.227739481                            | N                                            | 0                                      | N                                   |
| AC124312.1   | 0.227829842                            | N                                            | 0                                      | N                                   |
| AL731563.3   | 0.227829842                            | N                                            | 0                                      | N                                   |
| CTD-2328D6.1 | 0.227829842                            | N                                            | 0                                      | N                                   |
| HJURP        | 0.227829842                            | N                                            | 0                                      | N                                   |
| MICALCL      | 0.227829842                            | N                                            | 0                                      | N                                   |
| PRICKLE2     | 0.227829842                            | N                                            | 0                                      | N                                   |

| Gene symbols | FDR (differential expression analysis) | Differentially expressed gene? Y, Yes; N, No | Number of insulin related publications | Insulin related gene? Y, Yes; N, No |
|--------------|----------------------------------------|----------------------------------------------|----------------------------------------|-------------------------------------|
| ZNF554       | 0.227829842                            | N                                            | 0                                      | N                                   |
| AC097263.1   | 0.228287382                            | N                                            | 0                                      | N                                   |
| ASH2L        | 0.228287382                            | N                                            | 0                                      | N                                   |
| RNASEH2A     | 0.228287382                            | N                                            | 1                                      | N                                   |
| USP9X        | 0.228287382                            | N                                            | 5                                      | N                                   |
| PKHD1        | 0.229080548                            | N                                            | 10                                     | N                                   |
| CEP44        | 0.229464815                            | N                                            | 0                                      | N                                   |
| IL6R         | 0.23040386                             | N                                            | 23                                     | N                                   |
| HMMR         | 0.230447678                            | N                                            | 0                                      | N                                   |
| MASTL        | 0.230447678                            | N                                            | 1                                      | N                                   |
| PTPRG        | 0.231142688                            | N                                            | 3                                      | N                                   |
| NPIP8        | 0.231530088                            | N                                            | 0                                      | N                                   |
| CCNA2        | 0.231626866                            | N                                            | 38                                     | N                                   |
| KDM7A        | 0.231626866                            | N                                            | 0                                      | N                                   |
| LRRC15       | 0.232273852                            | N                                            | 1                                      | N                                   |
| RNF170       | 0.232317282                            | N                                            | 0                                      | N                                   |
| CHD9         | 0.23298067                             | N                                            | 0                                      | N                                   |
| CNTNAP2      | 0.23298067                             | N                                            | 0                                      | N                                   |
| CPEB2-AS1    | 0.23298067                             | N                                            | 0                                      | N                                   |
| FOXJ3        | 0.23298067                             | N                                            | 0                                      | N                                   |
| LINC00578    | 0.23298067                             | N                                            | 0                                      | N                                   |
| LPCAT1       | 0.23298067                             | N                                            | 0                                      | N                                   |
| SMG6-IT1     | 0.23298067                             | N                                            | 0                                      | N                                   |
| TBC1D2B      | 0.23298067                             | N                                            | 1                                      | N                                   |
| ZFYVE9       | 0.23298067                             | N                                            | 1                                      | N                                   |
| ZNF287       | 0.23298067                             | N                                            | 0                                      | N                                   |
| MAD2L2       | 0.233364965                            | N                                            | 1                                      | N                                   |
| ABHD11       | 0.23353032                             | N                                            | 0                                      | N                                   |
| ARHGAP33     | 0.23353032                             | N                                            | 1                                      | N                                   |
| ARHGAP5-AS1  | 0.23353032                             | N                                            | 0                                      | N                                   |
| TRIM6        | 0.23353032                             | N                                            | 0                                      | N                                   |
| MARCH8       | 0.233577999                            | N                                            | 2                                      | N                                   |
| AL953862.2   | 0.233577999                            | N                                            | 0                                      | N                                   |
| BBS9         | 0.233577999                            | N                                            | 0                                      | N                                   |
| FAAP24       | 0.233577999                            | N                                            | 0                                      | N                                   |
| GPR62        | 0.233577999                            | N                                            | 0                                      | N                                   |
| HIST1H1A     | 0.233577999                            | N                                            | 0                                      | N                                   |
| MBD5         | 0.233577999                            | N                                            | 1                                      | N                                   |
| NEK4         | 0.233577999                            | N                                            | 0                                      | N                                   |
| PTH1R        | 0.233577999                            | N                                            | 12                                     | N                                   |
| VANGL1       | 0.233577999                            | N                                            | 2                                      | N                                   |
| CDK1         | 0.233590779                            | N                                            | 41                                     | N                                   |
| AL591135.1   | 0.23370063                             | N                                            | 0                                      | N                                   |
| AP002373.2   | 0.23370063                             | N                                            | 0                                      | N                                   |
| ARHGAP19     | 0.23370063                             | N                                            | 0                                      | N                                   |
| ARHGAP21     | 0.23370063                             | N                                            | 5                                      | N                                   |
| CDKN2C       | 0.23370063                             | N                                            | 17                                     | N                                   |
| CENPM        | 0.23370063                             | N                                            | 0                                      | N                                   |
| CPSF3        | 0.23370063                             | N                                            | 0                                      | N                                   |
| HSD17B2      | 0.23370063                             | N                                            | 9                                      | N                                   |
| TTC36        | 0.23370063                             | N                                            | 0                                      | N                                   |
| UBAC1        | 0.23370063                             | N                                            | 0                                      | N                                   |
| WDR34        | 0.23370063                             | N                                            | 0                                      | N                                   |
| PCDHGA9      | 0.234169246                            | N                                            | 0                                      | N                                   |
| FBN1         | 0.234946747                            | N                                            | 13                                     | N                                   |
| MRPS11P1     | 0.234946747                            | N                                            | 0                                      | N                                   |
| PPP2R5D      | 0.234946747                            | N                                            | 1                                      | N                                   |
| RHOH         | 0.234946747                            | N                                            | 0                                      | N                                   |
| TTC3         | 0.234946747                            | N                                            | 0                                      | N                                   |
| ZNF234       | 0.234946747                            | N                                            | 0                                      | N                                   |
| PCDHGB3      | 0.235176438                            | N                                            | 0                                      | N                                   |
| CIART        | 0.235922567                            | N                                            | 1                                      | N                                   |
| CMTM4        | 0.235922567                            | N                                            | 0                                      | N                                   |
| GGA2         | 0.235922567                            | N                                            | 4                                      | N                                   |
| N4BP2L2-IT2  | 0.235922567                            | N                                            | 0                                      | N                                   |
| NCAPH        | 0.235922567                            | N                                            | 0                                      | N                                   |

| Gene symbols | FDR (differential expression analysis) | Differentially expressed gene? Y, Yes; N, No | Number of insulin related publications | Insulin related gene? Y, Yes; N, No |
|--------------|----------------------------------------|----------------------------------------------|----------------------------------------|-------------------------------------|
| NDFIP1       | 0.235922567                            | N                                            | 2                                      | N                                   |
| PPIH         | 0.235922567                            | N                                            | 0                                      | N                                   |
| RANP8        | 0.235922567                            | N                                            | 0                                      | N                                   |
| SART3        | 0.235922567                            | N                                            | 0                                      | N                                   |
| CDC20        | 0.236094572                            | N                                            | 5                                      | N                                   |
| CTNNA3       | 0.236094572                            | N                                            | 3                                      | N                                   |
| DDX55P1      | 0.236094572                            | N                                            | 0                                      | N                                   |
| HEATR5A      | 0.236094572                            | N                                            | 0                                      | N                                   |
| LINC00663    | 0.236094572                            | N                                            | 0                                      | N                                   |
| RPL39L       | 0.236094572                            | N                                            | 0                                      | N                                   |
| CDCA2        | 0.237704733                            | N                                            | 1                                      | N                                   |
| CKB          | 0.237704733                            | N                                            | 5                                      | N                                   |
| CYP4X1       | 0.237704733                            | N                                            | 0                                      | N                                   |
| MASP1        | 0.237704733                            | N                                            | 3                                      | N                                   |
| NNMT         | 0.237704733                            | N                                            | 11                                     | N                                   |
| ST5          | 0.237704733                            | N                                            | 10                                     | N                                   |
| UQCC2        | 0.237704733                            | N                                            | 0                                      | N                                   |
| AC073476.3   | 0.238880017                            | N                                            | 0                                      | N                                   |
| CDK2         | 0.238880017                            | N                                            | 113                                    | Y                                   |
| NBEAP1       | 0.238880017                            | N                                            | 0                                      | N                                   |
| PACSIN2      | 0.238880017                            | N                                            | 0                                      | N                                   |
| S1PR3        | 0.238880017                            | N                                            | 6                                      | N                                   |
| SEC16B       | 0.238880017                            | N                                            | 4                                      | N                                   |
| SLC22A4      | 0.238880017                            | N                                            | 3                                      | N                                   |
| SLC39A9      | 0.238880017                            | N                                            | 0                                      | N                                   |
| XPC          | 0.238880017                            | N                                            | 5                                      | N                                   |
| YBEY         | 0.238880017                            | N                                            | 0                                      | N                                   |
| NES          | 0.239198078                            | N                                            | 155                                    | Y                                   |
| KIAA1524     | 0.239594099                            | N                                            | 0                                      | N                                   |
| AC116447.1   | 0.240541116                            | N                                            | 0                                      | N                                   |
| GRN          | 0.240541116                            | N                                            | 52                                     | N                                   |
| C6orf62      | 0.240768452                            | N                                            | 0                                      | N                                   |
| LMCD1        | 0.241062763                            | N                                            | 2                                      | N                                   |
| TLE3         | 0.241062763                            | N                                            | 9                                      | N                                   |
| SCLT1        | 0.241177274                            | N                                            | 0                                      | N                                   |
| SERINC3      | 0.241666078                            | N                                            | 0                                      | N                                   |
| NEK10        | 0.241701817                            | N                                            | 0                                      | N                                   |
| AC018445.4   | 0.241989946                            | N                                            | 0                                      | N                                   |
| ANGEL1       | 0.242227741                            | N                                            | 0                                      | N                                   |
| ATM          | 0.242227741                            | N                                            | 266                                    | Y                                   |
| EPB41        | 0.242227741                            | N                                            | 2                                      | N                                   |
| TMEM184C     | 0.242227741                            | N                                            | 0                                      | N                                   |
| AC069499.1   | 0.242264557                            | N                                            | 0                                      | N                                   |
| FAXDC2       | 0.242584184                            | N                                            | 0                                      | N                                   |
| DLEU2L       | 0.243064902                            | N                                            | 0                                      | N                                   |
| MSL1         | 0.243064902                            | N                                            | 0                                      | N                                   |
| DNAJC17      | 0.243068237                            | N                                            | 0                                      | N                                   |
| IL16         | 0.243212621                            | N                                            | 11                                     | N                                   |
| KRT86        | 0.243212621                            | N                                            | 0                                      | N                                   |
| AP003486.1   | 0.243544963                            | N                                            | 0                                      | N                                   |
| CNTN5        | 0.243544963                            | N                                            | 0                                      | N                                   |
| CSRNP2       | 0.243544963                            | N                                            | 0                                      | N                                   |
| RCAN1        | 0.243544963                            | N                                            | 11                                     | N                                   |
| SLC38A2      | 0.243544963                            | N                                            | 22                                     | N                                   |
| SPRY1        | 0.243544963                            | N                                            | 4                                      | N                                   |
| ADAM12       | 0.244047816                            | N                                            | 23                                     | N                                   |
| HYLS1        | 0.244265058                            | N                                            | 0                                      | N                                   |
| PAM          | 0.244265058                            | N                                            | 83                                     | N                                   |
| PWAR6        | 0.244265058                            | N                                            | 0                                      | N                                   |
| TRIP13       | 0.244265058                            | N                                            | 1                                      | N                                   |
| CHMP7        | 0.244566082                            | N                                            | 1                                      | N                                   |
| CENPS-CORT   | 0.244794941                            | N                                            | 0                                      | N                                   |
| AC010306.1   | 0.244958996                            | N                                            | 0                                      | N                                   |
| MRAS         | 0.244958996                            | N                                            | 7                                      | N                                   |
| TMEM167B     | 0.244958996                            | N                                            | 0                                      | N                                   |
| AC005837.1   | 0.245052035                            | N                                            | 0                                      | N                                   |

| Gene symbols | FDR (differential expression analysis) | Differentially expressed gene? Y, Yes; N, No | Number of insulin related publications | Insulin related gene? Y, Yes; N, No |
|--------------|----------------------------------------|----------------------------------------------|----------------------------------------|-------------------------------------|
| COL4A3BP     | 0.245242156                            | N                                            | 1                                      | N                                   |
| AC092675.1   | 0.245867023                            | N                                            | 0                                      | N                                   |
| AL161911.1   | 0.245867023                            | N                                            | 0                                      | N                                   |
| PDGFRB       | 0.245867023                            | N                                            | 351                                    | Y                                   |
| SRSF7        | 0.245867023                            | N                                            | 0                                      | N                                   |
| VWA1         | 0.245867023                            | N                                            | 0                                      | N                                   |
| PXDC1        | 0.246129518                            | N                                            | 0                                      | N                                   |
| LRRC20       | 0.24697344                             | N                                            | 0                                      | N                                   |
| TMEM238      | 0.24697344                             | N                                            | 0                                      | N                                   |
| AC026790.1   | 0.248195588                            | N                                            | 0                                      | N                                   |
| SPARC        | 0.248613717                            | N                                            | 93                                     | N                                   |
| SF3A3        | 0.248962482                            | N                                            | 0                                      | N                                   |
| AC009533.1   | 0.249407494                            | N                                            | 0                                      | N                                   |
| AC103988.2   | 0.249407494                            | N                                            | 0                                      | N                                   |
| AL358942.1   | 0.249407494                            | N                                            | 0                                      | N                                   |
| CCDC170      | 0.249407494                            | N                                            | 0                                      | N                                   |
| CPQ          | 0.249407494                            | N                                            | 2                                      | N                                   |
| GTF2H4       | 0.249407494                            | N                                            | 0                                      | N                                   |
| HAUS8        | 0.249407494                            | N                                            | 0                                      | N                                   |
| JAKMIP3      | 0.249407494                            | N                                            | 0                                      | N                                   |
| KIZ          | 0.249407494                            | N                                            | 7                                      | N                                   |
| SUSD6        | 0.249407494                            | N                                            | 0                                      | N                                   |
| NEURL1       | 0.249532446                            | N                                            | 0                                      | N                                   |
| LINC00115    | 0.249738269                            | N                                            | 0                                      | N                                   |
| AC104083.1   | 0.249750944                            | N                                            | 0                                      | N                                   |
| ATP6AP2      | 0.249750944                            | N                                            | 9                                      | N                                   |
| LINC00670    | 0.249750944                            | N                                            | 0                                      | N                                   |
| MAP1A        | 0.249750944                            | N                                            | 4                                      | N                                   |
| MEX3C        | 0.249750944                            | N                                            | 2                                      | N                                   |
| PLA2R1       | 0.249750944                            | N                                            | 0                                      | N                                   |
| PSMD9        | 0.249750944                            | N                                            | 11                                     | N                                   |
| RFTN2        | 0.249750944                            | N                                            | 0                                      | N                                   |
| ZNF502       | 0.249750944                            | N                                            | 0                                      | N                                   |
| ZNF516       | 0.249750944                            | N                                            | 0                                      | N                                   |
| ZNF540       | 0.249750944                            | N                                            | 0                                      | N                                   |
| AC007566.1   | 0.25001432                             | N                                            | 0                                      | N                                   |
| SLC2A12      | 0.25001432                             | N                                            | 20                                     | N                                   |
| INTS4        | 0.25023131                             | N                                            | 0                                      | N                                   |
| CKAP5        | 0.250333944                            | N                                            | 1                                      | N                                   |
| HBG2         | 0.250461407                            | N                                            | 0                                      | N                                   |
| KCTD7        | 0.250461407                            | N                                            | 0                                      | N                                   |
| MELK         | 0.250461407                            | N                                            | 5                                      | N                                   |
| NBEA         | 0.250461407                            | N                                            | 1                                      | N                                   |
| SLC11A2      | 0.250461407                            | N                                            | 3                                      | N                                   |
| CIDEB        | 0.250556756                            | N                                            | 9                                      | N                                   |
| RN7SL242P    | 0.250629549                            | N                                            | 0                                      | N                                   |
| STAT2        | 0.251725956                            | N                                            | 11                                     | N                                   |
| TNS3         | 0.251964789                            | N                                            | 1                                      | N                                   |
| AP001160.2   | 0.252202289                            | N                                            | 0                                      | N                                   |
| CEP164       | 0.252202289                            | N                                            | 0                                      | N                                   |
| CGNL1        | 0.252202289                            | N                                            | 0                                      | N                                   |
| ZNF233       | 0.252202289                            | N                                            | 0                                      | N                                   |
| ZNF511       | 0.252202289                            | N                                            | 0                                      | N                                   |
| ATP5A1P2     | 0.252398038                            | N                                            | 0                                      | N                                   |
| TM4SF20      | 0.252398038                            | N                                            | 0                                      | N                                   |
| TVP23BP2     | 0.252398038                            | N                                            | 0                                      | N                                   |
| SUPT16H      | 0.25282142                             | N                                            | 0                                      | N                                   |
| AC022211.2   | 0.253053422                            | N                                            | 0                                      | N                                   |
| AC104115.1   | 0.253053422                            | N                                            | 0                                      | N                                   |
| ATF7IP       | 0.253053422                            | N                                            | 0                                      | N                                   |
| BIN3         | 0.253053422                            | N                                            | 0                                      | N                                   |
| C18orf25     | 0.253053422                            | N                                            | 0                                      | N                                   |
| CLIP4        | 0.253053422                            | N                                            | 0                                      | N                                   |
| DSEL         | 0.253053422                            | N                                            | 1                                      | N                                   |
| EIF4G3       | 0.253053422                            | N                                            | 0                                      | N                                   |
| FGF11        | 0.253053422                            | N                                            | 1                                      | N                                   |

| Gene symbols  | FDR (differential expression analysis) | Differentially expressed gene? Y, Yes; N, No | Number of insulin related publications | Insulin related gene? Y, Yes; N, No |
|---------------|----------------------------------------|----------------------------------------------|----------------------------------------|-------------------------------------|
| LMNB1         | 0.253053422                            | N                                            | 1                                      | N                                   |
| MXD1          | 0.253053422                            | N                                            | 4                                      | N                                   |
| OASL          | 0.253053422                            | N                                            | 1                                      | N                                   |
| RALA          | 0.253053422                            | N                                            | 28                                     | N                                   |
| RP11-701H24.8 | 0.253053422                            | N                                            | 0                                      | N                                   |
| SLC25A23      | 0.253053422                            | N                                            | 0                                      | N                                   |
| SLC9A7        | 0.253053422                            | N                                            | 0                                      | N                                   |
| SNRPA1        | 0.253053422                            | N                                            | 0                                      | N                                   |
| SNRPG         | 0.253053422                            | N                                            | 0                                      | N                                   |
| SS18          | 0.253113801                            | N                                            | 4                                      | N                                   |
| SMIM4         | 0.253411345                            | N                                            | 0                                      | N                                   |
| DCAF6         | 0.25404482                             | N                                            | 0                                      | N                                   |
| FOXE1         | 0.25404482                             | N                                            | 4                                      | N                                   |
| HNRNPRP1      | 0.25404482                             | N                                            | 0                                      | N                                   |
| JAZF1         | 0.25404482                             | N                                            | 29                                     | N                                   |
| LMF1          | 0.25404482                             | N                                            | 4                                      | N                                   |
| MSH5-SAPCD1   | 0.25404482                             | N                                            | 0                                      | N                                   |
| PAK2          | 0.25404482                             | N                                            | 9                                      | N                                   |
| PPP4R1        | 0.25404482                             | N                                            | 0                                      | N                                   |
| RNPC3         | 0.25404482                             | N                                            | 1                                      | N                                   |
| ROBO1         | 0.25404482                             | N                                            | 3                                      | N                                   |
| SAMD4A        | 0.25404482                             | N                                            | 1                                      | N                                   |
| SNRNP40       | 0.25404482                             | N                                            | 0                                      | N                                   |
| TIGD4         | 0.25404482                             | N                                            | 0                                      | N                                   |
| UBE2CP1       | 0.25404482                             | N                                            | 0                                      | N                                   |
| ANGPTL4       | 0.254251792                            | N                                            | 101                                    | Y                                   |
| FGF16         | 0.254894221                            | N                                            | 3                                      | N                                   |
| CCDC12        | 0.255007799                            | N                                            | 0                                      | N                                   |
| GPC2          | 0.255032388                            | N                                            | 0                                      | N                                   |
| NUDT1         | 0.255032388                            | N                                            | 0                                      | N                                   |
| SLC5A2        | 0.255032388                            | N                                            | 218                                    | Y                                   |
| XIST          | 0.255032388                            | N                                            | 13                                     | N                                   |
| LINC02015     | 0.255634522                            | N                                            | 0                                      | N                                   |
| ZNF224        | 0.255634522                            | N                                            | 0                                      | N                                   |
| AC107021.2    | 0.256039458                            | N                                            | 0                                      | N                                   |
| ACTL6A        | 0.256039458                            | N                                            | 0                                      | N                                   |
| LINC01094     | 0.256039458                            | N                                            | 0                                      | N                                   |
| OMD           | 0.256039458                            | N                                            | 2                                      | N                                   |
| RARRES2       | 0.256039458                            | N                                            | 18                                     | N                                   |
| SFR1          | 0.256039458                            | N                                            | 0                                      | N                                   |
| SPAG17        | 0.256039458                            | N                                            | 0                                      | N                                   |
| TXNRD3        | 0.256039458                            | N                                            | 0                                      | N                                   |
| AC048341.2    | 0.256096693                            | N                                            | 0                                      | N                                   |
| TOGARAM1      | 0.256096693                            | N                                            | 0                                      | N                                   |
| STMN1         | 0.256272099                            | N                                            | 8                                      | N                                   |
| AC253536.3    | 0.25649767                             | N                                            | 0                                      | N                                   |
| ADAMTSL2      | 0.25649767                             | N                                            | 0                                      | N                                   |
| AL078590.3    | 0.25649767                             | N                                            | 0                                      | N                                   |
| C16orf95      | 0.25649767                             | N                                            | 0                                      | N                                   |
| CAMLG         | 0.25649767                             | N                                            | 0                                      | N                                   |
| DENND1B       | 0.25649767                             | N                                            | 1                                      | N                                   |
| ELAVL2        | 0.25649767                             | N                                            | 0                                      | N                                   |
| PCNT          | 0.25649767                             | N                                            | 8                                      | N                                   |
| PTPN14        | 0.25649767                             | N                                            | 0                                      | N                                   |
| RBM15         | 0.25649767                             | N                                            | 0                                      | N                                   |
| ZNF570        | 0.25649767                             | N                                            | 0                                      | N                                   |
| AC016590.3    | 0.257182524                            | N                                            | 0                                      | N                                   |
| AC010894.1    | 0.257370979                            | N                                            | 0                                      | N                                   |
| AC104785.1    | 0.257370979                            | N                                            | 0                                      | N                                   |
| AF127577.4    | 0.257370979                            | N                                            | 0                                      | N                                   |
| AP006623.1    | 0.257370979                            | N                                            | 0                                      | N                                   |
| BBS1          | 0.257370979                            | N                                            | 6                                      | N                                   |
| HECW1         | 0.257370979                            | N                                            | 0                                      | N                                   |
| NFIL3         | 0.257370979                            | N                                            | 12                                     | N                                   |
| SNRPF         | 0.257370979                            | N                                            | 32                                     | N                                   |
| SWI5          | 0.257370979                            | N                                            | 0                                      | N                                   |



| Gene symbols | FDR (differential expression analysis) | Differentially expressed gene? Y, Yes; N, No | Number of insulin related publications | Insulin related gene? Y, Yes; N, No |
|--------------|----------------------------------------|----------------------------------------------|----------------------------------------|-------------------------------------|
| AC010457.1   | 0.257493858                            | N                                            | 0                                      | N                                   |
| AL139241.1   | 0.257493858                            | N                                            | 0                                      | N                                   |
| CSNK1G3      | 0.257493858                            | N                                            | 0                                      | N                                   |
| H2AFX        | 0.257493858                            | N                                            | 1                                      | N                                   |
| PTPN21       | 0.257493858                            | N                                            | 0                                      | N                                   |
| SCAI         | 0.257493858                            | N                                            | 7                                      | N                                   |
| TP63         | 0.257493858                            | N                                            | 15                                     | N                                   |
| TSC1         | 0.257493858                            | N                                            | 147                                    | Y                                   |
| KDM5B        | 0.257861124                            | N                                            | 2                                      | N                                   |
| SV2C         | 0.257959366                            | N                                            | 1                                      | N                                   |
| ZNF322       | 0.257959366                            | N                                            | 0                                      | N                                   |
| DOK6         | 0.25821848                             | N                                            | 0                                      | N                                   |
| ANKRD39      | 0.258777223                            | N                                            | 0                                      | N                                   |
| BUB3P1       | 0.258777223                            | N                                            | 0                                      | N                                   |
| GAN          | 0.258777223                            | N                                            | 535                                    | Y                                   |
| TUBG2        | 0.258777223                            | N                                            | 0                                      | N                                   |
| ADAMTS16     | 0.258824392                            | N                                            | 1                                      | N                                   |
| COG6         | 0.258824392                            | N                                            | 0                                      | N                                   |
| LBH          | 0.258824392                            | N                                            | 1                                      | N                                   |
| MOV10L1      | 0.258824392                            | N                                            | 0                                      | N                                   |
| TMEM248      | 0.258824392                            | N                                            | 0                                      | N                                   |
| AIG1         | 0.259175539                            | N                                            | 0                                      | N                                   |
| DIP2C        | 0.259175539                            | N                                            | 0                                      | N                                   |
| TANK         | 0.259175539                            | N                                            | 74                                     | N                                   |
| WDR62        | 0.259175539                            | N                                            | 1                                      | N                                   |
| ITIH5        | 0.259360354                            | N                                            | 0                                      | N                                   |
| AC002429.2   | 0.259502673                            | N                                            | 0                                      | N                                   |
| TTPAL        | 0.259502673                            | N                                            | 0                                      | N                                   |
| SEC31A       | 0.259573691                            | N                                            | 1                                      | N                                   |
| AC021231.2   | 0.259644725                            | N                                            | 0                                      | N                                   |
| AC023283.1   | 0.260080036                            | N                                            | 0                                      | N                                   |
| AC092757.2   | 0.260080036                            | N                                            | 0                                      | N                                   |
| AC138470.1   | 0.260080036                            | N                                            | 0                                      | N                                   |
| BBS12        | 0.260080036                            | N                                            | 1                                      | N                                   |
| C1orf112     | 0.260080036                            | N                                            | 0                                      | N                                   |
| DCPS         | 0.260080036                            | N                                            | 0                                      | N                                   |
| GABRP        | 0.260080036                            | N                                            | 0                                      | N                                   |
| ILF2P1       | 0.260080036                            | N                                            | 0                                      | N                                   |
| PHF21A       | 0.260080036                            | N                                            | 0                                      | N                                   |
| PHF7         | 0.260080036                            | N                                            | 0                                      | N                                   |
| POP4         | 0.260080036                            | N                                            | 1                                      | N                                   |
| RASSF2       | 0.260080036                            | N                                            | 3                                      | N                                   |
| SRP9P1       | 0.260080036                            | N                                            | 0                                      | N                                   |
| TTC39C       | 0.260080036                            | N                                            | 0                                      | N                                   |
| USP46-AS1    | 0.260080036                            | N                                            | 0                                      | N                                   |
| VANGL2       | 0.260080036                            | N                                            | 1                                      | N                                   |
| ZNF155       | 0.260080036                            | N                                            | 0                                      | N                                   |
| ZNF419       | 0.260080036                            | N                                            | 1                                      | N                                   |
| AC048344.4   | 0.260459986                            | N                                            | 0                                      | N                                   |
| C7orf49      | 0.260523017                            | N                                            | 0                                      | N                                   |
| FBXO39       | 0.260523017                            | N                                            | 0                                      | N                                   |
| BTBD9        | 0.260835264                            | N                                            | 0                                      | N                                   |
| MAPRE3       | 0.260835264                            | N                                            | 0                                      | N                                   |
| PAQR9        | 0.260835264                            | N                                            | 0                                      | N                                   |
| PHOSPHO2     | 0.260835264                            | N                                            | 0                                      | N                                   |
| UBE2SP1      | 0.260835264                            | N                                            | 0                                      | N                                   |
| GLE1         | 0.261125658                            | N                                            | 0                                      | N                                   |
| BDH2         | 0.261232189                            | N                                            | 1                                      | N                                   |
| GRIN2D       | 0.261232189                            | N                                            | 0                                      | N                                   |
| SLC25A5P2    | 0.261232189                            | N                                            | 0                                      | N                                   |
| MGC27382     | 0.26132335                             | N                                            | 0                                      | N                                   |
| AL078595.1   | 0.261397969                            | N                                            | 0                                      | N                                   |
| PCDHAC1      | 0.261397969                            | N                                            | 0                                      | N                                   |
| ROR2         | 0.261397969                            | N                                            | 7                                      | N                                   |
| AP000781.2   | 0.261415252                            | N                                            | 0                                      | N                                   |
| TGFB3        | 0.261415252                            | N                                            | 94                                     | N                                   |

| Gene symbols | FDR (differential expression analysis) | Differentially expressed gene? Y, Yes; N, No | Number of insulin related publications | Insulin related gene? Y, Yes; N, No |
|--------------|----------------------------------------|----------------------------------------------|----------------------------------------|-------------------------------------|
| TRAPPC4      | 0.261415252                            | N                                            | 0                                      | N                                   |
| ZMYM5        | 0.261415252                            | N                                            | 0                                      | N                                   |
| AL135744.1   | 0.261498175                            | N                                            | 0                                      | N                                   |
| ATP9B        | 0.261498175                            | N                                            | 0                                      | N                                   |
| MANF         | 0.261498175                            | N                                            | 10                                     | N                                   |
| RNF5         | 0.261498175                            | N                                            | 0                                      | N                                   |
| LBR          | 0.261797158                            | N                                            | 2                                      | N                                   |
| TRIM61       | 0.26211793                             | N                                            | 0                                      | N                                   |
| ABCB5        | 0.262641977                            | N                                            | 0                                      | N                                   |
| DIAPH3       | 0.262683935                            | N                                            | 0                                      | N                                   |
| GYPE         | 0.262683935                            | N                                            | 0                                      | N                                   |
| SGO1         | 0.262683935                            | N                                            | 1                                      | N                                   |
| AC009108.4   | 0.26280641                             | N                                            | 0                                      | N                                   |
| AC046195.1   | 0.26280641                             | N                                            | 0                                      | N                                   |
| AC110597.1   | 0.26280641                             | N                                            | 0                                      | N                                   |
| AL391684.1   | 0.26280641                             | N                                            | 0                                      | N                                   |
| C5orf34      | 0.26280641                             | N                                            | 0                                      | N                                   |
| CENPW        | 0.26280641                             | N                                            | 0                                      | N                                   |
| CNGB3        | 0.26280641                             | N                                            | 1                                      | N                                   |
| ERN1         | 0.26280641                             | N                                            | 67                                     | N                                   |
| FANCG        | 0.26280641                             | N                                            | 0                                      | N                                   |
| FYN          | 0.26280641                             | N                                            | 72                                     | N                                   |
| IST1         | 0.26280641                             | N                                            | 0                                      | N                                   |
| MEF2AP1      | 0.26280641                             | N                                            | 0                                      | N                                   |
| POPDC2       | 0.26280641                             | N                                            | 0                                      | N                                   |
| RNF216       | 0.26280641                             | N                                            | 0                                      | N                                   |
| UBE2S        | 0.26280641                             | N                                            | 0                                      | N                                   |
| NATD1        | 0.263007569                            | N                                            | 0                                      | N                                   |
| GPR137B      | 0.263608046                            | N                                            | 0                                      | N                                   |
| AC011242.1   | 0.263890066                            | N                                            | 0                                      | N                                   |
| AC084251.1   | 0.263890066                            | N                                            | 0                                      | N                                   |
| OSBPL9       | 0.263890066                            | N                                            | 0                                      | N                                   |
| MAD2L1       | 0.263949508                            | N                                            | 3                                      | N                                   |
| AC069120.2   | 0.263964415                            | N                                            | 0                                      | N                                   |
| NT5E         | 0.264104302                            | N                                            | 6                                      | N                                   |
| AL669831.1   | 0.264212382                            | N                                            | 0                                      | N                                   |
| AL928654.4   | 0.264552487                            | N                                            | 0                                      | N                                   |
| GCC2         | 0.264552487                            | N                                            | 0                                      | N                                   |
| IGFBP2       | 0.264552487                            | N                                            | 363                                    | Y                                   |
| SH3PXD2A     | 0.264552487                            | N                                            | 0                                      | N                                   |
| AC010127.1   | 0.2647905                              | N                                            | 0                                      | N                                   |
| AL591623.1   | 0.2647905                              | N                                            | 0                                      | N                                   |
| CLASP1       | 0.2647905                              | N                                            | 0                                      | N                                   |
| CYTL1        | 0.2647905                              | N                                            | 3                                      | N                                   |
| ERAP1        | 0.2647905                              | N                                            | 11                                     | N                                   |
| GNS          | 0.2647905                              | N                                            | 8                                      | N                                   |
| HPDL         | 0.2647905                              | N                                            | 3                                      | N                                   |
| IFNGR1       | 0.2647905                              | N                                            | 3                                      | N                                   |
| RNF169       | 0.2647905                              | N                                            | 0                                      | N                                   |
| ZNF664       | 0.2647905                              | N                                            | 1                                      | N                                   |
| RAPGEF2      | 0.264993764                            | N                                            | 2                                      | N                                   |
| C15orf62     | 0.265550943                            | N                                            | 0                                      | N                                   |
| FBF1         | 0.265550943                            | N                                            | 0                                      | N                                   |
| RANBP1       | 0.265550943                            | N                                            | 0                                      | N                                   |
| RBFADN       | 0.265550943                            | N                                            | 0                                      | N                                   |
| ZNF253       | 0.265550943                            | N                                            | 0                                      | N                                   |
| ZSCAN32      | 0.265550943                            | N                                            | 0                                      | N                                   |
| AC016590.2   | 0.265870695                            | N                                            | 0                                      | N                                   |
| AC068790.7   | 0.265870695                            | N                                            | 0                                      | N                                   |
| AC243829.1   | 0.265870695                            | N                                            | 0                                      | N                                   |
| AP003419.3   | 0.265870695                            | N                                            | 0                                      | N                                   |
| C4BPB        | 0.265870695                            | N                                            | 0                                      | N                                   |
| CCDC61       | 0.265870695                            | N                                            | 0                                      | N                                   |
| EIF4B        | 0.265870695                            | N                                            | 18                                     | N                                   |
| ELOVL2       | 0.265870695                            | N                                            | 10                                     | N                                   |
| GBP1P1       | 0.265870695                            | N                                            | 0                                      | N                                   |

| Gene symbols  | FDR (differential expression analysis) | Differentially expressed gene? Y, Yes; N, No | Number of insulin related publications | Insulin related gene? Y, Yes; N, No |
|---------------|----------------------------------------|----------------------------------------------|----------------------------------------|-------------------------------------|
| GEMIN6        | 0.265870695                            | N                                            | 0                                      | N                                   |
| KIF13A        | 0.265870695                            | N                                            | 0                                      | N                                   |
| NDE1          | 0.265870695                            | N                                            | 1                                      | N                                   |
| PRDX6         | 0.265870695                            | N                                            | 13                                     | N                                   |
| RANBP9        | 0.265870695                            | N                                            | 0                                      | N                                   |
| RP11-248J23.6 | 0.265870695                            | N                                            | 0                                      | N                                   |
| SHC2          | 0.265870695                            | N                                            | 1                                      | N                                   |
| SPAG5-AS1     | 0.265870695                            | N                                            | 0                                      | N                                   |
| TAS2R4        | 0.265870695                            | N                                            | 0                                      | N                                   |
| TNFRSF19      | 0.265870695                            | N                                            | 0                                      | N                                   |
| TRIM16L       | 0.265870695                            | N                                            | 0                                      | N                                   |
| YPEL2         | 0.265870695                            | N                                            | 0                                      | N                                   |
| AC020604.1    | 0.265955051                            | N                                            | 0                                      | N                                   |
| AC109992.1    | 0.265955051                            | N                                            | 0                                      | N                                   |
| AFG3L1P       | 0.265955051                            | N                                            | 0                                      | N                                   |
| ALDH2         | 0.265955051                            | N                                            | 30                                     | N                                   |
| DUTP5         | 0.265955051                            | N                                            | 0                                      | N                                   |
| ERMAP         | 0.265955051                            | N                                            | 0                                      | N                                   |
| EYA4          | 0.265955051                            | N                                            | 0                                      | N                                   |
| FANCI         | 0.265955051                            | N                                            | 1                                      | N                                   |
| HMBS          | 0.265955051                            | N                                            | 0                                      | N                                   |
| LINC00939     | 0.265955051                            | N                                            | 0                                      | N                                   |
| NDRG2         | 0.265955051                            | N                                            | 5                                      | N                                   |
| OSMR          | 0.265955051                            | N                                            | 7                                      | N                                   |
| PHC3          | 0.265955051                            | N                                            | 0                                      | N                                   |
| RGL1          | 0.265955051                            | N                                            | 0                                      | N                                   |
| SLC22A2       | 0.265955051                            | N                                            | 12                                     | N                                   |
| TEC           | 0.265955051                            | N                                            | 62                                     | N                                   |
| UBE2T         | 0.266222868                            | N                                            | 0                                      | N                                   |
| WDFY3         | 0.266326043                            | N                                            | 0                                      | N                                   |
| AL139339.1    | 0.266533062                            | N                                            | 0                                      | N                                   |
| AL358075.4    | 0.266638941                            | N                                            | 0                                      | N                                   |
| CCDC137       | 0.266638941                            | N                                            | 0                                      | N                                   |
| CDC27P2       | 0.266638941                            | N                                            | 0                                      | N                                   |
| RBM8B         | 0.266638941                            | N                                            | 0                                      | N                                   |
| UBXN11        | 0.266638941                            | N                                            | 0                                      | N                                   |
| SLAIN1        | 0.266844747                            | N                                            | 0                                      | N                                   |
| ADM2          | 0.2668684                              | N                                            | 3                                      | N                                   |
| DRAM2         | 0.266960965                            | N                                            | 0                                      | N                                   |
| IPMK          | 0.266960965                            | N                                            | 5                                      | N                                   |
| PAX5          | 0.266960965                            | N                                            | 5                                      | N                                   |
| RPL13P5       | 0.266960965                            | N                                            | 0                                      | N                                   |
| ZKSCAN1       | 0.266960965                            | N                                            | 0                                      | N                                   |
| LMBRD1        | 0.267571423                            | N                                            | 2                                      | N                                   |
| AL035398.1    | 0.267778684                            | N                                            | 0                                      | N                                   |
| SHTN1         | 0.267778684                            | N                                            | 0                                      | N                                   |
| BTF3P8        | 0.267838924                            | N                                            | 0                                      | N                                   |
| MIS18A        | 0.267838924                            | N                                            | 1                                      | N                                   |
| RPS4XP5       | 0.267838924                            | N                                            | 0                                      | N                                   |
| C16orf72      | 0.267999139                            | N                                            | 0                                      | N                                   |
| GLDN          | 0.267999139                            | N                                            | 0                                      | N                                   |
| AC009086.2    | 0.268083479                            | N                                            | 0                                      | N                                   |
| AC011939.2    | 0.268083479                            | N                                            | 0                                      | N                                   |
| AC239800.2    | 0.268083479                            | N                                            | 0                                      | N                                   |
| AL353705.4    | 0.268083479                            | N                                            | 0                                      | N                                   |
| AL365181.2    | 0.268083479                            | N                                            | 0                                      | N                                   |
| AP003040.1    | 0.268083479                            | N                                            | 0                                      | N                                   |
| BANF1         | 0.268083479                            | N                                            | 2                                      | N                                   |
| CCND2         | 0.268083479                            | N                                            | 60                                     | N                                   |
| CDH13         | 0.268083479                            | N                                            | 16                                     | N                                   |
| DNAJC7        | 0.268083479                            | N                                            | 0                                      | N                                   |
| EFNB2         | 0.268083479                            | N                                            | 3                                      | N                                   |
| EIF4A2P3      | 0.268083479                            | N                                            | 0                                      | N                                   |
| EME1          | 0.268083479                            | N                                            | 0                                      | N                                   |
| FBXW8         | 0.268083479                            | N                                            | 7                                      | N                                   |
| FMNL2         | 0.268083479                            | N                                            | 0                                      | N                                   |

| Gene symbols | FDR (differential expression analysis) | Differentially expressed gene? Y, Yes; N, No | Number of insulin related publications | Insulin related gene? Y, Yes; N, No |
|--------------|----------------------------------------|----------------------------------------------|----------------------------------------|-------------------------------------|
| HAUS4P1      | 0.268083479                            | N                                            | 0                                      | N                                   |
| MRPS18B      | 0.268083479                            | N                                            | 0                                      | N                                   |
| PCLAF        | 0.268083479                            | N                                            | 0                                      | N                                   |
| PLA2G5       | 0.268083479                            | N                                            | 2                                      | N                                   |
| POPDC3       | 0.268083479                            | N                                            | 0                                      | N                                   |
| SEPT14P12    | 0.268083479                            | N                                            | 0                                      | N                                   |
| SGO2         | 0.268083479                            | N                                            | 0                                      | N                                   |
| SPATA6       | 0.268083479                            | N                                            | 0                                      | N                                   |
| ZDBF2        | 0.268083479                            | N                                            | 0                                      | N                                   |
| ZFYVE1       | 0.268083479                            | N                                            | 1                                      | N                                   |
| SLF2         | 0.268087634                            | N                                            | 0                                      | N                                   |
| CDKN2AIPNL   | 0.268371877                            | N                                            | 0                                      | N                                   |
| OLFML2A      | 0.268833187                            | N                                            | 0                                      | N                                   |
| AC005062.1   | 0.268998761                            | N                                            | 0                                      | N                                   |
| AC008764.6   | 0.268998761                            | N                                            | 0                                      | N                                   |
| AC012676.1   | 0.268998761                            | N                                            | 0                                      | N                                   |
| AC025165.5   | 0.268998761                            | N                                            | 0                                      | N                                   |
| AC073439.1   | 0.268998761                            | N                                            | 0                                      | N                                   |
| AC139451.1   | 0.268998761                            | N                                            | 0                                      | N                                   |
| AP003057.1   | 0.268998761                            | N                                            | 0                                      | N                                   |
| BIVM         | 0.268998761                            | N                                            | 0                                      | N                                   |
| CCDC150      | 0.268998761                            | N                                            | 0                                      | N                                   |
| CDK18        | 0.268998761                            | N                                            | 2                                      | N                                   |
| CXCL2        | 0.268998761                            | N                                            | 37                                     | N                                   |
| CXCL6        | 0.268998761                            | N                                            | 9                                      | N                                   |
| FBXW10       | 0.268998761                            | N                                            | 0                                      | N                                   |
| FRRS1L       | 0.268998761                            | N                                            | 0                                      | N                                   |
| GPR75-ASB3   | 0.268998761                            | N                                            | 0                                      | N                                   |
| HNRNPL       | 0.268998761                            | N                                            | 1                                      | N                                   |
| IQGAP3       | 0.268998761                            | N                                            | 0                                      | N                                   |
| KSR1         | 0.268998761                            | N                                            | 4                                      | N                                   |
| MTBP         | 0.268998761                            | N                                            | 0                                      | N                                   |
| OSTC         | 0.268998761                            | N                                            | 0                                      | N                                   |
| PSMD5-AS1    | 0.268998761                            | N                                            | 0                                      | N                                   |
| RTKN2        | 0.268998761                            | N                                            | 0                                      | N                                   |
| SNX19        | 0.268998761                            | N                                            | 5                                      | N                                   |
| SUSD4        | 0.268998761                            | N                                            | 1                                      | N                                   |
| TMPO-AS1     | 0.268998761                            | N                                            | 0                                      | N                                   |
| TNIP3        | 0.268998761                            | N                                            | 1                                      | N                                   |
| TRIM44       | 0.268998761                            | N                                            | 0                                      | N                                   |
| TXLNB        | 0.268998761                            | N                                            | 0                                      | N                                   |
| ZNF117       | 0.268998761                            | N                                            | 0                                      | N                                   |
| ZNF391       | 0.268998761                            | N                                            | 0                                      | N                                   |
| ZNF529       | 0.268998761                            | N                                            | 0                                      | N                                   |
| ZNF804B      | 0.268998761                            | N                                            | 0                                      | N                                   |
| ZWINT        | 0.268998761                            | N                                            | 1                                      | N                                   |
| ARMC2        | 0.269023463                            | N                                            | 0                                      | N                                   |
| PCDHB7       | 0.269023463                            | N                                            | 0                                      | N                                   |
| DHRS4        | 0.269543339                            | N                                            | 0                                      | N                                   |
| PLK4         | 0.269819182                            | N                                            | 1                                      | N                                   |
| CCT6B        | 0.269827038                            | N                                            | 0                                      | N                                   |
| FBXO24       | 0.269848938                            | N                                            | 1                                      | N                                   |
| BUD13        | 0.269983619                            | N                                            | 2                                      | N                                   |
| AL390955.1   | 0.270017999                            | N                                            | 0                                      | N                                   |
| DBF4P1       | 0.27005913                             | N                                            | 0                                      | N                                   |
| FANCD2       | 0.27005913                             | N                                            | 0                                      | N                                   |
| AC090572.3   | 0.270257507                            | N                                            | 0                                      | N                                   |
| AC112220.4   | 0.270257507                            | N                                            | 0                                      | N                                   |
| ALYREF       | 0.270257507                            | N                                            | 0                                      | N                                   |
| CHIT1        | 0.270257507                            | N                                            | 2                                      | N                                   |
| ENTPD7       | 0.270257507                            | N                                            | 0                                      | N                                   |
| FAM136A      | 0.270257507                            | N                                            | 0                                      | N                                   |
| AC022306.1   | 0.270262815                            | N                                            | 0                                      | N                                   |
| AL691447.2   | 0.270355295                            | N                                            | 0                                      | N                                   |
| TMEM225B     | 0.270355295                            | N                                            | 0                                      | N                                   |
| MAP3K8       | 0.270485092                            | N                                            | 9                                      | N                                   |

| Gene symbols | FDR (differential expression analysis) | Differentially expressed gene? Y, Yes; N, No | Number of insulin related publications | Insulin related gene? Y, Yes; N, No |
|--------------|----------------------------------------|----------------------------------------------|----------------------------------------|-------------------------------------|
| AFF4         | 0.270577289                            | N                                            | 0                                      | N                                   |
| COL27A1      | 0.270577289                            | N                                            | 0                                      | N                                   |
| ITGAV        | 0.270577289                            | N                                            | 2                                      | N                                   |
| MEGF6        | 0.270577289                            | N                                            | 0                                      | N                                   |
| C5orf63      | 0.27088793                             | N                                            | 0                                      | N                                   |
| GTDC1        | 0.27088793                             | N                                            | 0                                      | N                                   |
| CETN3        | 0.270954062                            | N                                            | 0                                      | N                                   |
| LINC02432    | 0.270954062                            | N                                            | 0                                      | N                                   |
| SSR4P1       | 0.271145458                            | N                                            | 0                                      | N                                   |
| BRWD1        | 0.271335389                            | N                                            | 0                                      | N                                   |
| PIK3C3       | 0.271335389                            | N                                            | 5                                      | N                                   |
| RPS4XP11     | 0.271335389                            | N                                            | 0                                      | N                                   |
| SHISA3       | 0.271335389                            | N                                            | 0                                      | N                                   |
| EXOSC2       | 0.271424787                            | N                                            | 0                                      | N                                   |
| TUG1         | 0.271966748                            | N                                            | 2                                      | N                                   |
| ABHD4        | 0.272346875                            | N                                            | 0                                      | N                                   |
| AL035681.1   | 0.272346875                            | N                                            | 0                                      | N                                   |
| C16orf62     | 0.272346875                            | N                                            | 0                                      | N                                   |
| CLDN23       | 0.272346875                            | N                                            | 0                                      | N                                   |
| CSTF2        | 0.272346875                            | N                                            | 1                                      | N                                   |
| LINC02504    | 0.272346875                            | N                                            | 0                                      | N                                   |
| OLR1         | 0.272346875                            | N                                            | 19                                     | N                                   |
| POP5         | 0.272346875                            | N                                            | 0                                      | N                                   |
| TATDN3       | 0.272346875                            | N                                            | 0                                      | N                                   |
| ZNF8         | 0.272346875                            | N                                            | 0                                      | N                                   |
| AC090409.1   | 0.272640082                            | N                                            | 0                                      | N                                   |
| CCNG1P1      | 0.272640082                            | N                                            | 0                                      | N                                   |
| ELF1         | 0.272640082                            | N                                            | 1                                      | N                                   |
| HLA-DPB1     | 0.272640082                            | N                                            | 14                                     | N                                   |
| MEIS2        | 0.272640082                            | N                                            | 6                                      | N                                   |
| PIR          | 0.272640082                            | N                                            | 76                                     | N                                   |
| PRR4         | 0.272640082                            | N                                            | 0                                      | N                                   |
| RFX7         | 0.272640082                            | N                                            | 0                                      | N                                   |
| SRSF12       | 0.272640082                            | N                                            | 0                                      | N                                   |
| Z95327.2     | 0.272640082                            | N                                            | 0                                      | N                                   |
| AC005180.1   | 0.272741669                            | N                                            | 0                                      | N                                   |
| AC087683.2   | 0.272741669                            | N                                            | 0                                      | N                                   |
| AC241952.1   | 0.272741669                            | N                                            | 0                                      | N                                   |
| AURKB        | 0.272741669                            | N                                            | 7                                      | N                                   |
| KIAA0895     | 0.272741669                            | N                                            | 0                                      | N                                   |
| DDX39B       | 0.272789596                            | N                                            | 0                                      | N                                   |
| MARCKS       | 0.272789596                            | N                                            | 27                                     | N                                   |
| RHEB         | 0.272789596                            | N                                            | 120                                    | Y                                   |
| AC078795.2   | 0.272938534                            | N                                            | 0                                      | N                                   |
| AC096772.6   | 0.272938534                            | N                                            | 0                                      | N                                   |
| AC144831.1   | 0.272938534                            | N                                            | 0                                      | N                                   |
| ADM          | 0.272938534                            | N                                            | 136                                    | Y                                   |
| ATP2B4       | 0.272938534                            | N                                            | 2                                      | N                                   |
| CCDC110      | 0.272938534                            | N                                            | 0                                      | N                                   |
| CENPK        | 0.272938534                            | N                                            | 0                                      | N                                   |
| CSE1L        | 0.272938534                            | N                                            | 0                                      | N                                   |
| CXXC4        | 0.272938534                            | N                                            | 1                                      | N                                   |
| DDTL         | 0.272938534                            | N                                            | 0                                      | N                                   |
| DDX12P       | 0.272938534                            | N                                            | 0                                      | N                                   |
| EIF4A3       | 0.272938534                            | N                                            | 1                                      | N                                   |
| FKBP7        | 0.272938534                            | N                                            | 0                                      | N                                   |
| GSTM4        | 0.272938534                            | N                                            | 2                                      | N                                   |
| HIST1H4H     | 0.272938534                            | N                                            | 0                                      | N                                   |
| KLF7         | 0.272938534                            | N                                            | 3                                      | N                                   |
| LENG1        | 0.272938534                            | N                                            | 0                                      | N                                   |
| MED13L       | 0.272938534                            | N                                            | 1                                      | N                                   |
| NCAPGP2      | 0.272938534                            | N                                            | 0                                      | N                                   |
| NEDD4        | 0.272938534                            | N                                            | 60                                     | N                                   |
| PCDHGB2      | 0.272938534                            | N                                            | 0                                      | N                                   |
| REXO5        | 0.272938534                            | N                                            | 0                                      | N                                   |
| RIC1         | 0.272938534                            | N                                            | 0                                      | N                                   |

| Gene symbols | FDR (differential expression analysis) | Differentially expressed gene? Y, Yes; N, No | Number of insulin related publications | Insulin related gene? Y, Yes; N, No |
|--------------|----------------------------------------|----------------------------------------------|----------------------------------------|-------------------------------------|
| ZNF555       | 0.272938534                            | N                                            | 0                                      | N                                   |
| AC092127.2   | 0.272988409                            | N                                            | 0                                      | N                                   |
| ELK4         | 0.272988409                            | N                                            | 1                                      | N                                   |
| MYOZ1        | 0.272988409                            | N                                            | 0                                      | N                                   |
| AL035530.2   | 0.273463623                            | N                                            | 0                                      | N                                   |
| FN1          | 0.273463623                            | N                                            | 27                                     | N                                   |
| GLDC         | 0.273943168                            | N                                            | 1                                      | N                                   |
| AP002360.2   | 0.273947249                            | N                                            | 0                                      | N                                   |
| CBX1         | 0.273947249                            | N                                            | 0                                      | N                                   |
| LMCD1-AS1    | 0.273947249                            | N                                            | 0                                      | N                                   |
| MAX          | 0.273947249                            | N                                            | 1000                                   | Y                                   |
| SLC38A4      | 0.273947249                            | N                                            | 9                                      | N                                   |
| CES3         | 0.274282238                            | N                                            | 7                                      | N                                   |
| ANO6         | 0.274742215                            | N                                            | 0                                      | N                                   |
| AC009237.15  | 0.274818228                            | N                                            | 0                                      | N                                   |
| GOLGA8N      | 0.274818228                            | N                                            | 0                                      | N                                   |
| PPP6R3       | 0.274818228                            | N                                            | 0                                      | N                                   |
| RP3-368A4.5  | 0.274818228                            | N                                            | 0                                      | N                                   |
| SUCNR1       | 0.274818228                            | N                                            | 2                                      | N                                   |
| CAMSAP2      | 0.274976345                            | N                                            | 0                                      | N                                   |
| FILIP1L      | 0.274976345                            | N                                            | 0                                      | N                                   |
| FRK          | 0.274976345                            | N                                            | 9                                      | N                                   |
| RPRD2        | 0.274976345                            | N                                            | 0                                      | N                                   |
| ZHX2         | 0.275185282                            | N                                            | 1                                      | N                                   |
| AP000569.1   | 0.275502604                            | N                                            | 0                                      | N                                   |
| ARHGAP25     | 0.275529147                            | N                                            | 0                                      | N                                   |
| ASIC2        | 0.275529147                            | N                                            | 2                                      | N                                   |
| MARK1        | 0.275529147                            | N                                            | 2                                      | N                                   |
| MS4A10       | 0.275529147                            | N                                            | 0                                      | N                                   |
| SLC6A6       | 0.275529147                            | N                                            | 0                                      | N                                   |
| SRSF1        | 0.275529147                            | N                                            | 3                                      | N                                   |
| TMC6         | 0.275529147                            | N                                            | 0                                      | N                                   |
| WWC2         | 0.275529147                            | N                                            | 0                                      | N                                   |
| ZNF805       | 0.275743248                            | N                                            | 0                                      | N                                   |
| AC012618.3   | 0.275760319                            | N                                            | 0                                      | N                                   |
| AC084880.1   | 0.275760319                            | N                                            | 0                                      | N                                   |
| AC106038.1   | 0.275760319                            | N                                            | 0                                      | N                                   |
| AC107959.3   | 0.275760319                            | N                                            | 0                                      | N                                   |
| AL137003.2   | 0.275760319                            | N                                            | 0                                      | N                                   |
| AL513477.1   | 0.275760319                            | N                                            | 0                                      | N                                   |
| APLF         | 0.275760319                            | N                                            | 0                                      | N                                   |
| C21orf58     | 0.275760319                            | N                                            | 0                                      | N                                   |
| CDC20P1      | 0.275760319                            | N                                            | 0                                      | N                                   |
| ERO1B        | 0.275760319                            | N                                            | 2                                      | N                                   |
| EZH2         | 0.275760319                            | N                                            | 57                                     | N                                   |
| FAM151B      | 0.275760319                            | N                                            | 0                                      | N                                   |
| FLJ38576     | 0.275760319                            | N                                            | 0                                      | N                                   |
| HERPUD2      | 0.275760319                            | N                                            | 0                                      | N                                   |
| HMCES        | 0.275760319                            | N                                            | 0                                      | N                                   |
| ITGB6        | 0.275760319                            | N                                            | 2                                      | N                                   |
| MNS1         | 0.275760319                            | N                                            | 0                                      | N                                   |
| MUTYH        | 0.275760319                            | N                                            | 1                                      | N                                   |
| NFE2         | 0.275760319                            | N                                            | 10                                     | N                                   |
| PKD2         | 0.275760319                            | N                                            | 61                                     | N                                   |
| PLA2G2F      | 0.275760319                            | N                                            | 0                                      | N                                   |
| PQBP1        | 0.275760319                            | N                                            | 1                                      | N                                   |
| RAB11FIP1P1  | 0.275760319                            | N                                            | 0                                      | N                                   |
| RASSF10      | 0.275760319                            | N                                            | 0                                      | N                                   |
| REST         | 0.275760319                            | N                                            | 1000                                   | Y                                   |
| RNF32        | 0.275760319                            | N                                            | 0                                      | N                                   |
| SATB1        | 0.275760319                            | N                                            | 1                                      | N                                   |
| SGCD         | 0.275760319                            | N                                            | 0                                      | N                                   |
| SH3BGRL      | 0.275760319                            | N                                            | 0                                      | N                                   |
| TRIM60P14    | 0.275760319                            | N                                            | 0                                      | N                                   |
| UPF3B        | 0.275760319                            | N                                            | 0                                      | N                                   |
| VGLL3        | 0.275760319                            | N                                            | 3                                      | N                                   |

| Gene symbols | FDR (differential expression analysis) | Differentially expressed gene? Y, Yes; N, No | Number of insulin related publications | Insulin related gene? Y, Yes; N, No |
|--------------|----------------------------------------|----------------------------------------------|----------------------------------------|-------------------------------------|
| ZBTB4        | 0.275760319                            | N                                            | 0                                      | N                                   |
| ZNF382       | 0.275760319                            | N                                            | 0                                      | N                                   |
| TAS2R3       | 0.275948767                            | N                                            | 0                                      | N                                   |
| NEIL3        | 0.27599777                             | N                                            | 2                                      | N                                   |
| PTPRK        | 0.27599777                             | N                                            | 3                                      | N                                   |
| ZNF226       | 0.277765061                            | N                                            | 0                                      | N                                   |
| ATG16L1      | 0.278011437                            | N                                            | 9                                      | N                                   |
| AC026740.1   | 0.278146289                            | N                                            | 0                                      | N                                   |
| RAB10        | 0.278354929                            | N                                            | 36                                     | N                                   |
| RRAS2        | 0.278354929                            | N                                            | 1                                      | N                                   |
| RRM1         | 0.278354929                            | N                                            | 4                                      | N                                   |
| FGFR2        | 0.278455391                            | N                                            | 62                                     | N                                   |
| GABRQ        | 0.278470363                            | N                                            | 0                                      | N                                   |
| PSIP1        | 0.278740972                            | N                                            | 0                                      | N                                   |
| TEAD1        | 0.278740972                            | N                                            | 4                                      | N                                   |
| ZNF337-AS1   | 0.278740972                            | N                                            | 0                                      | N                                   |
| SCPEP1       | 0.278928016                            | N                                            | 0                                      | N                                   |
| TECTA        | 0.278928016                            | N                                            | 3                                      | N                                   |
| HS6ST3       | 0.279295776                            | N                                            | 0                                      | N                                   |
| JAML         | 0.279295776                            | N                                            | 1                                      | N                                   |
| LEF1         | 0.279295776                            | N                                            | 15                                     | N                                   |
| OSR2         | 0.279295776                            | N                                            | 0                                      | N                                   |
| PCDHGA1      | 0.279295776                            | N                                            | 1                                      | N                                   |
| ASF1B        | 0.279718127                            | N                                            | 2                                      | N                                   |
| B3GNT6       | 0.279718127                            | N                                            | 0                                      | N                                   |
| HNRNPH1      | 0.279718127                            | N                                            | 0                                      | N                                   |
| PTPN2        | 0.279718127                            | N                                            | 42                                     | N                                   |
| SLC41A2      | 0.279718127                            | N                                            | 1                                      | N                                   |
| SNRPN        | 0.279718127                            | N                                            | 51                                     | N                                   |
| WDR92        | 0.279718127                            | N                                            | 0                                      | N                                   |
| FAM8A1       | 0.28040315                             | N                                            | 1                                      | N                                   |
| DDX23        | 0.280461302                            | N                                            | 0                                      | N                                   |
| NELFE        | 0.280461302                            | N                                            | 1                                      | N                                   |
| TLL2         | 0.280461302                            | N                                            | 1                                      | N                                   |
| RNF112       | 0.281496415                            | N                                            | 0                                      | N                                   |
| AC007906.1   | 0.281646148                            | N                                            | 0                                      | N                                   |
| AC008813.1   | 0.281646148                            | N                                            | 0                                      | N                                   |
| AC009950.1   | 0.281646148                            | N                                            | 0                                      | N                                   |
| AC025809.2   | 0.281646148                            | N                                            | 0                                      | N                                   |
| AC068860.1   | 0.281646148                            | N                                            | 0                                      | N                                   |
| AGO3         | 0.281646148                            | N                                            | 0                                      | N                                   |
| AL590032.1   | 0.281646148                            | N                                            | 0                                      | N                                   |
| AMPD3        | 0.281646148                            | N                                            | 1                                      | N                                   |
| ARFGEF2      | 0.281646148                            | N                                            | 1                                      | N                                   |
| ARHGAP11A    | 0.281646148                            | N                                            | 0                                      | N                                   |
| CH25H        | 0.281646148                            | N                                            | 3                                      | N                                   |
| DHX9P1       | 0.281646148                            | N                                            | 0                                      | N                                   |
| GAREM1       | 0.281646148                            | N                                            | 1                                      | N                                   |
| GEN1         | 0.281646148                            | N                                            | 0                                      | N                                   |
| HIVEP1       | 0.281646148                            | N                                            | 1                                      | N                                   |
| IMPACT       | 0.281646148                            | N                                            | 1000                                   | Y                                   |
| INCENP       | 0.281646148                            | N                                            | 2                                      | N                                   |
| KLHDC10      | 0.281646148                            | N                                            | 0                                      | N                                   |
| LINC01470    | 0.281646148                            | N                                            | 0                                      | N                                   |
| MRM1         | 0.281646148                            | N                                            | 0                                      | N                                   |
| MZB1         | 0.281646148                            | N                                            | 0                                      | N                                   |
| PAPD4        | 0.281646148                            | N                                            | 0                                      | N                                   |
| PCDH1        | 0.281646148                            | N                                            | 1                                      | N                                   |
| RAB6B        | 0.281646148                            | N                                            | 0                                      | N                                   |
| SCD          | 0.281646148                            | N                                            | 301                                    | Y                                   |
| SF3A3P1      | 0.281646148                            | N                                            | 0                                      | N                                   |
| SLC37A4      | 0.281646148                            | N                                            | 17                                     | N                                   |
| TCP11L2      | 0.281646148                            | N                                            | 0                                      | N                                   |
| TLR6         | 0.281646148                            | N                                            | 5                                      | N                                   |
| TRAIP        | 0.281646148                            | N                                            | 0                                      | N                                   |
| URI1         | 0.281646148                            | N                                            | 1                                      | N                                   |

| Gene symbols | FDR (differential expression analysis) | Differentially expressed gene? Y, Yes; N, No | Number of insulin related publications | Insulin related gene? Y, Yes; N, No |
|--------------|----------------------------------------|----------------------------------------------|----------------------------------------|-------------------------------------|
| ZCCHC6       | 0.281646148                            | N                                            | 0                                      | N                                   |
| ZWILCH       | 0.281646148                            | N                                            | 0                                      | N                                   |
| ABCA10       | 0.281955772                            | N                                            | 0                                      | N                                   |
| AC006504.3   | 0.281955772                            | N                                            | 0                                      | N                                   |
| AL359711.2   | 0.281955772                            | N                                            | 0                                      | N                                   |
| ARHGEF16     | 0.281955772                            | N                                            | 0                                      | N                                   |
| E2F3-IT1     | 0.281955772                            | N                                            | 0                                      | N                                   |
| KCTD10       | 0.281955772                            | N                                            | 0                                      | N                                   |
| LIPH         | 0.281955772                            | N                                            | 1                                      | N                                   |
| PSMC5        | 0.281955772                            | N                                            | 1                                      | N                                   |
| THBS1        | 0.281955772                            | N                                            | 106                                    | Y                                   |
| TMEM159      | 0.281955772                            | N                                            | 0                                      | N                                   |
| ZNF709       | 0.281955772                            | N                                            | 0                                      | N                                   |
| FKBPL        | 0.281993823                            | N                                            | 0                                      | N                                   |
| KCNE5        | 0.281993823                            | N                                            | 1                                      | N                                   |
| KIAA2026     | 0.281993823                            | N                                            | 0                                      | N                                   |
| AC007899.1   | 0.282118763                            | N                                            | 0                                      | N                                   |
| CEP83-AS1    | 0.282118763                            | N                                            | 0                                      | N                                   |
| KLC4         | 0.282118763                            | N                                            | 0                                      | N                                   |
| PAF1         | 0.282118763                            | N                                            | 0                                      | N                                   |
| SGMS1-AS1    | 0.282118763                            | N                                            | 0                                      | N                                   |
| SLC1A6       | 0.282118763                            | N                                            | 1                                      | N                                   |
| TNPO3        | 0.282118763                            | N                                            | 0                                      | N                                   |
| TRA2B        | 0.282118763                            | N                                            | 2                                      | N                                   |
| HGSNAT       | 0.282433089                            | N                                            | 0                                      | N                                   |
| GPR150       | 0.283020032                            | N                                            | 0                                      | N                                   |
| CENPI        | 0.283382426                            | N                                            | 0                                      | N                                   |
| PMF1         | 0.283382426                            | N                                            | 0                                      | N                                   |
| VCAM1        | 0.283382426                            | N                                            | 16                                     | N                                   |
| ZNF460       | 0.283382426                            | N                                            | 0                                      | N                                   |
| A2M          | 0.283404694                            | N                                            | 15                                     | N                                   |
| WFDC21P      | 0.283404694                            | N                                            | 0                                      | N                                   |
| ANKRD24      | 0.283825114                            | N                                            | 0                                      | N                                   |
| MANBA        | 0.283825114                            | N                                            | 0                                      | N                                   |
| RWDD2B       | 0.283825114                            | N                                            | 0                                      | N                                   |
| BZW1P1       | 0.283932444                            | N                                            | 0                                      | N                                   |
| FOSL2        | 0.283932444                            | N                                            | 3                                      | N                                   |
| HHLA3        | 0.283932444                            | N                                            | 0                                      | N                                   |
| HMGB1P5      | 0.283932444                            | N                                            | 0                                      | N                                   |
| MXD3         | 0.283932444                            | N                                            | 1                                      | N                                   |
| PTGER4       | 0.283932444                            | N                                            | 7                                      | N                                   |
| TM9SF4       | 0.283932444                            | N                                            | 0                                      | N                                   |
| TRIM58       | 0.283932444                            | N                                            | 0                                      | N                                   |
| VDAC3        | 0.283932444                            | N                                            | 1                                      | N                                   |
| AC089984.2   | 0.284027374                            | N                                            | 0                                      | N                                   |
| CASP6        | 0.284027374                            | N                                            | 13                                     | N                                   |
| CMTM3        | 0.284027374                            | N                                            | 1                                      | N                                   |
| EEF1AKMT1    | 0.284027374                            | N                                            | 0                                      | N                                   |
| FAM122A      | 0.284027374                            | N                                            | 0                                      | N                                   |
| KDM4A-AS1    | 0.284027374                            | N                                            | 0                                      | N                                   |
| MRPL27       | 0.284027374                            | N                                            | 0                                      | N                                   |
| MUC16        | 0.284027374                            | N                                            | 8                                      | N                                   |
| RSPH3        | 0.284027374                            | N                                            | 0                                      | N                                   |
| SESN2        | 0.284027374                            | N                                            | 11                                     | N                                   |
| VRK2         | 0.284027374                            | N                                            | 0                                      | N                                   |
| XRCC3        | 0.284027374                            | N                                            | 3                                      | N                                   |
| ZNF827       | 0.284027374                            | N                                            | 1                                      | N                                   |
| COMMD4       | 0.284064672                            | N                                            | 0                                      | N                                   |
| ZNF91        | 0.284064672                            | N                                            | 1                                      | N                                   |
| CENPN        | 0.284427285                            | N                                            | 0                                      | N                                   |
| CIT          | 0.284427285                            | N                                            | 196                                    | Y                                   |
| CYB5B        | 0.284427285                            | N                                            | 0                                      | N                                   |
| DNAJB9       | 0.284427285                            | N                                            | 1                                      | N                                   |
| PLOD2        | 0.284427285                            | N                                            | 0                                      | N                                   |
| UBE2D4       | 0.284427285                            | N                                            | 0                                      | N                                   |
| VARS2        | 0.284427285                            | N                                            | 0                                      | N                                   |



| Gene symbols   | FDR (differential expression analysis) | Differentially expressed gene? Y, Yes; N, No | Number of insulin related publications | Insulin related gene? Y, Yes; N, No |
|----------------|----------------------------------------|----------------------------------------------|----------------------------------------|-------------------------------------|
| CEP85          | 0.284489987                            | N                                            | 0                                      | N                                   |
| FAM111A        | 0.284691001                            | N                                            | 2                                      | N                                   |
| CCDC77         | 0.284812477                            | N                                            | 0                                      | N                                   |
| GLG1           | 0.284812477                            | N                                            | 0                                      | N                                   |
| KIFC1          | 0.284812477                            | N                                            | 0                                      | N                                   |
| NSMCE4A        | 0.284812477                            | N                                            | 0                                      | N                                   |
| FAM234B        | 0.284924833                            | N                                            | 0                                      | N                                   |
| AC021205.1     | 0.28512174                             | N                                            | 0                                      | N                                   |
| C17orf97       | 0.28512174                             | N                                            | 0                                      | N                                   |
| C3orf33        | 0.28512174                             | N                                            | 0                                      | N                                   |
| EPHA5          | 0.28512174                             | N                                            | 8                                      | N                                   |
| MPZL1          | 0.28512174                             | N                                            | 0                                      | N                                   |
| ODF2           | 0.28512174                             | N                                            | 2                                      | N                                   |
| ZIC4           | 0.28512174                             | N                                            | 0                                      | N                                   |
| FTSJ3          | 0.285623874                            | N                                            | 0                                      | N                                   |
| TMEM45A        | 0.285789298                            | N                                            | 0                                      | N                                   |
| AC026355.3     | 0.285827298                            | N                                            | 0                                      | N                                   |
| AC092610.1     | 0.285827298                            | N                                            | 0                                      | N                                   |
| AC099850.1     | 0.285827298                            | N                                            | 0                                      | N                                   |
| AC106028.3     | 0.285827298                            | N                                            | 0                                      | N                                   |
| ADAM20P1       | 0.285827298                            | N                                            | 0                                      | N                                   |
| AL136455.1     | 0.285827298                            | N                                            | 0                                      | N                                   |
| CACNA1B        | 0.285827298                            | N                                            | 1                                      | N                                   |
| CCT5           | 0.285827298                            | N                                            | 0                                      | N                                   |
| EPOP           | 0.285827298                            | N                                            | 0                                      | N                                   |
| INSIG2         | 0.285827298                            | N                                            | 108                                    | Y                                   |
| LINC01572      | 0.285827298                            | N                                            | 0                                      | N                                   |
| LRRC36         | 0.285827298                            | N                                            | 0                                      | N                                   |
| MSTN           | 0.285827298                            | N                                            | 186                                    | Y                                   |
| NCAPG          | 0.285827298                            | N                                            | 1                                      | N                                   |
| PDSS1P2        | 0.285827298                            | N                                            | 0                                      | N                                   |
| PPARA          | 0.285827298                            | N                                            | 100                                    | N                                   |
| RNF149         | 0.285827298                            | N                                            | 0                                      | N                                   |
| TOM1           | 0.285827298                            | N                                            | 1                                      | N                                   |
| USF3           | 0.285827298                            | N                                            | 0                                      | N                                   |
| ZDHHC7         | 0.285827298                            | N                                            | 0                                      | N                                   |
| AC104058.1     | 0.285894848                            | N                                            | 0                                      | N                                   |
| AP003071.4     | 0.285894848                            | N                                            | 0                                      | N                                   |
| BCL7C          | 0.285894848                            | N                                            | 1                                      | N                                   |
| AL162632.2     | 0.286284944                            | N                                            | 0                                      | N                                   |
| CCPG1          | 0.286411978                            | N                                            | 0                                      | N                                   |
| AC016745.2     | 0.286714644                            | N                                            | 0                                      | N                                   |
| AL139260.1     | 0.286714644                            | N                                            | 0                                      | N                                   |
| AL445423.1     | 0.286714644                            | N                                            | 0                                      | N                                   |
| CYBRD1         | 0.286714644                            | N                                            | 0                                      | N                                   |
| MYCBP2         | 0.286714644                            | N                                            | 1                                      | N                                   |
| TMEM110-MUSTN1 | 0.286714644                            | N                                            | 0                                      | N                                   |
| RPSAP70        | 0.287560221                            | N                                            | 0                                      | N                                   |
| APBB2          | 0.287675989                            | N                                            | 2                                      | N                                   |
| SPC25          | 0.28801684                             | N                                            | 0                                      | N                                   |
| AP001994.1     | 0.288077202                            | N                                            | 0                                      | N                                   |
| GF11           | 0.288261175                            | N                                            | 0                                      | N                                   |
| ITGA2B         | 0.288261175                            | N                                            | 0                                      | N                                   |
| ITGB3BP        | 0.288261175                            | N                                            | 1                                      | N                                   |
| TRIM4          | 0.288261175                            | N                                            | 1                                      | N                                   |
| SFMBT2         | 0.288601416                            | N                                            | 0                                      | N                                   |
| EPHX2          | 0.289529967                            | N                                            | 15                                     | N                                   |
| VPS41          | 0.289591884                            | N                                            | 0                                      | N                                   |
| AC092718.4     | 0.28963731                             | N                                            | 0                                      | N                                   |
| PARP8          | 0.28963731                             | N                                            | 1                                      | N                                   |
| TBRG1          | 0.28963731                             | N                                            | 0                                      | N                                   |
| AC013652.2     | 0.289701475                            | N                                            | 0                                      | N                                   |
| AL450405.1     | 0.289701475                            | N                                            | 0                                      | N                                   |
| ATP8B3         | 0.289701475                            | N                                            | 2                                      | N                                   |
| ECM2           | 0.289701475                            | N                                            | 1                                      | N                                   |
| PDIA3          | 0.289701475                            | N                                            | 15                                     | N                                   |

| Gene symbols | FDR (differential expression analysis) | Differentially expressed gene? Y, Yes; N, No | Number of insulin related publications | Insulin related gene? Y, Yes; N, No |
|--------------|----------------------------------------|----------------------------------------------|----------------------------------------|-------------------------------------|
| TSR2         | 0.289701475                            | N                                            | 0                                      | N                                   |
| CACYBPP2     | 0.2901081                              | N                                            | 0                                      | N                                   |
| DISP1        | 0.2901081                              | N                                            | 0                                      | N                                   |
| RAB6A        | 0.2901081                              | N                                            | 0                                      | N                                   |
| VAV3         | 0.2901081                              | N                                            | 8                                      | N                                   |
| CHRNA5       | 0.290255448                            | N                                            | 2                                      | N                                   |
| TXNRD1       | 0.290258087                            | N                                            | 10                                     | N                                   |
| TPRKB        | 0.290652949                            | N                                            | 0                                      | N                                   |
| AC079336.2   | 0.290793695                            | N                                            | 0                                      | N                                   |
| LMAN2L       | 0.290793695                            | N                                            | 0                                      | N                                   |
| NBAS         | 0.290823907                            | N                                            | 2                                      | N                                   |
| AC092692.1   | 0.291231872                            | N                                            | 0                                      | N                                   |
| AL512283.1   | 0.291231872                            | N                                            | 0                                      | N                                   |
| AC008267.2   | 0.291238184                            | N                                            | 0                                      | N                                   |
| PPP5C        | 0.291473982                            | N                                            | 2                                      | N                                   |
| LINC01206    | 0.291582793                            | N                                            | 0                                      | N                                   |
| AC063944.1   | 0.291933851                            | N                                            | 0                                      | N                                   |
| AP000919.1   | 0.292087978                            | N                                            | 0                                      | N                                   |
| SOCS2-AS1    | 0.292087978                            | N                                            | 0                                      | N                                   |
| AC007611.1   | 0.292167993                            | N                                            | 0                                      | N                                   |
| AC012313.9   | 0.292167993                            | N                                            | 0                                      | N                                   |
| AC092647.3   | 0.292167993                            | N                                            | 0                                      | N                                   |
| AC138356.2   | 0.292167993                            | N                                            | 0                                      | N                                   |
| ACTBP7       | 0.292167993                            | N                                            | 0                                      | N                                   |
| AL096803.1   | 0.292167993                            | N                                            | 0                                      | N                                   |
| AL512329.1   | 0.292167993                            | N                                            | 0                                      | N                                   |
| AP001893.2   | 0.292167993                            | N                                            | 0                                      | N                                   |
| C15orf59     | 0.292167993                            | N                                            | 0                                      | N                                   |
| CCRL2        | 0.292167993                            | N                                            | 3                                      | N                                   |
| HIST1H4D     | 0.292167993                            | N                                            | 0                                      | N                                   |
| HMGN2P46     | 0.292167993                            | N                                            | 0                                      | N                                   |
| IPO11        | 0.292167993                            | N                                            | 1                                      | N                                   |
| KIAA0368     | 0.292167993                            | N                                            | 0                                      | N                                   |
| KNTC1        | 0.292167993                            | N                                            | 0                                      | N                                   |
| LINC01091    | 0.292167993                            | N                                            | 0                                      | N                                   |
| LPCAT2       | 0.292167993                            | N                                            | 0                                      | N                                   |
| MEF2BNBP1    | 0.292167993                            | N                                            | 0                                      | N                                   |
| MMP15        | 0.292167993                            | N                                            | 3                                      | N                                   |
| NABP1        | 0.292167993                            | N                                            | 0                                      | N                                   |
| PCDHGA6      | 0.292167993                            | N                                            | 0                                      | N                                   |
| RFPL1S       | 0.292167993                            | N                                            | 0                                      | N                                   |
| S1PR1        | 0.292167993                            | N                                            | 8                                      | N                                   |
| SH3TC2       | 0.292167993                            | N                                            | 0                                      | N                                   |
| SLC25A24     | 0.292167993                            | N                                            | 0                                      | N                                   |
| TMEM59       | 0.292167993                            | N                                            | 0                                      | N                                   |
| TNFAIP8      | 0.292167993                            | N                                            | 2                                      | N                                   |
| TTC38        | 0.292167993                            | N                                            | 0                                      | N                                   |
| ZNF160       | 0.292167993                            | N                                            | 0                                      | N                                   |
| ZNF470       | 0.292167993                            | N                                            | 0                                      | N                                   |
| AC005740.2   | 0.292413129                            | N                                            | 0                                      | N                                   |
| AC136475.1   | 0.292413129                            | N                                            | 0                                      | N                                   |
| AL356019.2   | 0.292413129                            | N                                            | 0                                      | N                                   |
| ARL2BP       | 0.292413129                            | N                                            | 0                                      | N                                   |
| ASS1P11      | 0.292413129                            | N                                            | 0                                      | N                                   |
| C9orf78      | 0.292413129                            | N                                            | 0                                      | N                                   |
| ELP6         | 0.292413129                            | N                                            | 0                                      | N                                   |
| FMO1         | 0.292413129                            | N                                            | 10                                     | N                                   |
| MEPCE        | 0.292413129                            | N                                            | 1                                      | N                                   |
| POLQ         | 0.292413129                            | N                                            | 0                                      | N                                   |
| SLC22A15     | 0.292413129                            | N                                            | 1                                      | N                                   |
| TF           | 0.292413129                            | N                                            | 314                                    | Y                                   |
| TMEM14C      | 0.292413129                            | N                                            | 0                                      | N                                   |
| WASF3        | 0.292413129                            | N                                            | 2                                      | N                                   |
| AC007388.1   | 0.292563197                            | N                                            | 0                                      | N                                   |
| AC083805.3   | 0.292882587                            | N                                            | 0                                      | N                                   |
| AP006296.1   | 0.292882587                            | N                                            | 0                                      | N                                   |

| Gene symbols | FDR (differential expression analysis) | Differentially expressed gene? Y, Yes; N, No | Number of insulin related publications | Insulin related gene? Y, Yes; N, No |
|--------------|----------------------------------------|----------------------------------------------|----------------------------------------|-------------------------------------|
| COLQ         | 0.292882587                            | N                                            | 0                                      | N                                   |
| ILF2         | 0.292882587                            | N                                            | 1                                      | N                                   |
| MRM3         | 0.292882587                            | N                                            | 0                                      | N                                   |
| PLPP6        | 0.292882587                            | N                                            | 0                                      | N                                   |
| PTK7         | 0.292882587                            | N                                            | 2                                      | N                                   |
| AC104123.1   | 0.292995455                            | N                                            | 0                                      | N                                   |
| ADAM33       | 0.2930025                              | N                                            | 3                                      | N                                   |
| AFF3         | 0.2930025                              | N                                            | 0                                      | N                                   |
| ARHGAP32     | 0.293178344                            | N                                            | 0                                      | N                                   |
| AC089998.3   | 0.293565393                            | N                                            | 0                                      | N                                   |
| DNAJC8       | 0.293565393                            | N                                            | 0                                      | N                                   |
| DRAP1        | 0.293565393                            | N                                            | 0                                      | N                                   |
| AC016772.1   | 0.293997803                            | N                                            | 0                                      | N                                   |
| NUDT16P1     | 0.29431831                             | N                                            | 0                                      | N                                   |
| AC111182.1   | 0.295204019                            | N                                            | 0                                      | N                                   |
| CCT7         | 0.295204019                            | N                                            | 0                                      | N                                   |
| HIVEP2       | 0.295204019                            | N                                            | 0                                      | N                                   |
| BICC1        | 0.295290864                            | N                                            | 2                                      | N                                   |
| AC091173.1   | 0.295489703                            | N                                            | 0                                      | N                                   |
| HPX          | 0.295489703                            | N                                            | 18                                     | N                                   |
| AC096533.1   | 0.295666421                            | N                                            | 0                                      | N                                   |
| CDKL4        | 0.295672585                            | N                                            | 0                                      | N                                   |
| SCD5         | 0.295672585                            | N                                            | 5                                      | N                                   |
| PRSS16       | 0.295697868                            | N                                            | 3                                      | N                                   |
| AL391730.1   | 0.295827098                            | N                                            | 0                                      | N                                   |
| PDLIM1P4     | 0.296241538                            | N                                            | 0                                      | N                                   |
| AC010385.1   | 0.296389306                            | N                                            | 0                                      | N                                   |
| AL110118.2   | 0.296389306                            | N                                            | 0                                      | N                                   |
| CAMK4        | 0.297053642                            | N                                            | 8                                      | N                                   |
| EEF2KMT      | 0.297053642                            | N                                            | 0                                      | N                                   |
| OSCP1        | 0.297053642                            | N                                            | 0                                      | N                                   |
| TMEM185A     | 0.297053642                            | N                                            | 0                                      | N                                   |
| TRAF3IP2     | 0.297053642                            | N                                            | 3                                      | N                                   |
| ZNF605       | 0.297053642                            | N                                            | 0                                      | N                                   |
| IL1R1        | 0.297295314                            | N                                            | 12                                     | N                                   |
| ICMT         | 0.29759749                             | N                                            | 2                                      | N                                   |
| AC090099.1   | 0.297759006                            | N                                            | 0                                      | N                                   |
| AC010501.1   | 0.297946435                            | N                                            | 0                                      | N                                   |
| DNAJB11      | 0.297946435                            | N                                            | 2                                      | N                                   |
| EGFR         | 0.297946435                            | N                                            | 1000                                   | Y                                   |
| NUDT15       | 0.297946435                            | N                                            | 0                                      | N                                   |
| ORAOV1       | 0.297946435                            | N                                            | 0                                      | N                                   |
| AC009075.2   | 0.298098601                            | N                                            | 0                                      | N                                   |
| AC245100.4   | 0.298098601                            | N                                            | 0                                      | N                                   |
| ZNF135       | 0.298098601                            | N                                            | 0                                      | N                                   |
| AC055716.2   | 0.298127943                            | N                                            | 0                                      | N                                   |
| LINC01605    | 0.298127943                            | N                                            | 0                                      | N                                   |
| CTSH         | 0.298143037                            | N                                            | 10                                     | N                                   |
| WSB1         | 0.298143037                            | N                                            | 2                                      | N                                   |
| AC026366.1   | 0.298419314                            | N                                            | 0                                      | N                                   |
| AL023806.3   | 0.298419314                            | N                                            | 0                                      | N                                   |
| AC104371.1   | 0.298694824                            | N                                            | 0                                      | N                                   |
| RAB2A        | 0.298694824                            | N                                            | 2                                      | N                                   |
| ZC3H11B      | 0.298694824                            | N                                            | 0                                      | N                                   |
| ZNF841       | 0.298694824                            | N                                            | 0                                      | N                                   |
| SPATA5       | 0.298953791                            | N                                            | 0                                      | N                                   |
| AL445183.3   | 0.299227648                            | N                                            | 0                                      | N                                   |
| MLYCD        | 0.299227648                            | N                                            | 3                                      | N                                   |
| PPCDC        | 0.299227648                            | N                                            | 0                                      | N                                   |
| RPL35P5      | 0.299227648                            | N                                            | 0                                      | N                                   |
| SLFN5        | 0.299227648                            | N                                            | 0                                      | N                                   |
| PINX1        | 0.29925723                             | N                                            | 0                                      | N                                   |
| BACE1        | 0.299481505                            | N                                            | 120                                    | Y                                   |
| LINC00167    | 0.299636026                            | N                                            | 0                                      | N                                   |
| TMEM43       | 0.299636026                            | N                                            | 0                                      | N                                   |
| YWHAH        | 0.299636026                            | N                                            | 1                                      | N                                   |

| Gene symbols | FDR (differential expression analysis) | Differentially expressed gene? Y, Yes; N, No | Number of insulin related publications | Insulin related gene? Y, Yes; N, No |
|--------------|----------------------------------------|----------------------------------------------|----------------------------------------|-------------------------------------|
| ZNF334       | 0.299636026                            | N                                            | 0                                      | N                                   |
| CLP1         | 0.299721896                            | N                                            | 0                                      | N                                   |
| NUP35        | 0.299721896                            | N                                            | 0                                      | N                                   |
| AC002467.1   | 0.299723287                            | N                                            | 0                                      | N                                   |
| C4orf33      | 0.299723287                            | N                                            | 0                                      | N                                   |
| EPS8         | 0.299723287                            | N                                            | 5                                      | N                                   |
| GRIK5        | 0.299723287                            | N                                            | 0                                      | N                                   |
| IFNAR1       | 0.299723287                            | N                                            | 9                                      | N                                   |
| RN7SKP269    | 0.299723287                            | N                                            | 0                                      | N                                   |
| RSL24D1      | 0.299723287                            | N                                            | 0                                      | N                                   |
| TCP1P3       | 0.299723287                            | N                                            | 0                                      | N                                   |
| UCK1         | 0.299723287                            | N                                            | 0                                      | N                                   |
| ZMYM2        | 0.299723287                            | N                                            | 0                                      | N                                   |
| FAR2P2       | 0.29985375                             | N                                            | 0                                      | N                                   |
| SNRPB        | 0.300742478                            | N                                            | 0                                      | N                                   |
| SUPT16HP1    | 0.300742478                            | N                                            | 0                                      | N                                   |
| ETV1         | 0.301035258                            | N                                            | 9                                      | N                                   |
| HOXA-AS3     | 0.301035258                            | N                                            | 0                                      | N                                   |
| ERLIN1       | 0.30106252                             | N                                            | 2                                      | N                                   |
| MRPS11       | 0.301067789                            | N                                            | 0                                      | N                                   |
| AC110994.1   | 0.30149473                             | N                                            | 0                                      | N                                   |
| ABLIM2       | 0.301698048                            | N                                            | 0                                      | N                                   |
| AC007098.1   | 0.301698048                            | N                                            | 0                                      | N                                   |
| AC010761.1   | 0.301698048                            | N                                            | 0                                      | N                                   |
| AC079753.1   | 0.301698048                            | N                                            | 0                                      | N                                   |
| AC080188.3   | 0.301698048                            | N                                            | 0                                      | N                                   |
| AP000254.1   | 0.301698048                            | N                                            | 0                                      | N                                   |
| BRAF1        | 0.301698048                            | N                                            | 0                                      | N                                   |
| COL11A1      | 0.301698048                            | N                                            | 2                                      | N                                   |
| EEF2K        | 0.301698048                            | N                                            | 18                                     | N                                   |
| ETV4         | 0.301698048                            | N                                            | 3                                      | N                                   |
| HINT2        | 0.301698048                            | N                                            | 3                                      | N                                   |
| HNRNPCP1     | 0.301698048                            | N                                            | 0                                      | N                                   |
| IFT20        | 0.301698048                            | N                                            | 0                                      | N                                   |
| KIAA1024     | 0.301698048                            | N                                            | 0                                      | N                                   |
| LINC01597    | 0.301698048                            | N                                            | 0                                      | N                                   |
| LPAR6        | 0.301698048                            | N                                            | 0                                      | N                                   |
| MAPK11P1L    | 0.301698048                            | N                                            | 0                                      | N                                   |
| RASIP1       | 0.301698048                            | N                                            | 2                                      | N                                   |
| SEC24A       | 0.301698048                            | N                                            | 0                                      | N                                   |
| TMSB15A      | 0.301698048                            | N                                            | 0                                      | N                                   |
| TRPC6        | 0.301698048                            | N                                            | 17                                     | N                                   |
| AC069366.2   | 0.302006697                            | N                                            | 0                                      | N                                   |
| AC104131.1   | 0.302006697                            | N                                            | 0                                      | N                                   |
| AP000688.1   | 0.302006697                            | N                                            | 0                                      | N                                   |
| ATG2B        | 0.302006697                            | N                                            | 1                                      | N                                   |
| CDK6         | 0.302006697                            | N                                            | 44                                     | N                                   |
| DISC1-IT1    | 0.302006697                            | N                                            | 0                                      | N                                   |
| DNAH3        | 0.302006697                            | N                                            | 0                                      | N                                   |
| GOLGA5       | 0.302006697                            | N                                            | 0                                      | N                                   |
| LINC00869    | 0.302006697                            | N                                            | 0                                      | N                                   |
| TRIM36       | 0.302006697                            | N                                            | 1                                      | N                                   |
| USO1         | 0.302006697                            | N                                            | 1                                      | N                                   |
| VSIG10       | 0.302006697                            | N                                            | 0                                      | N                                   |
| WDR31        | 0.302006697                            | N                                            | 0                                      | N                                   |
| AC011912.1   | 0.302193558                            | N                                            | 0                                      | N                                   |
| HNRNPKP4     | 0.302403183                            | N                                            | 0                                      | N                                   |
| LINC01482    | 0.302403183                            | N                                            | 0                                      | N                                   |
| PLCG2        | 0.302403183                            | N                                            | 2                                      | N                                   |
| KIAA0586     | 0.303140801                            | N                                            | 0                                      | N                                   |
| PRPF3        | 0.303140801                            | N                                            | 0                                      | N                                   |
| COL17A1      | 0.303163278                            | N                                            | 1                                      | N                                   |
| HIST1H2BD    | 0.303163278                            | N                                            | 0                                      | N                                   |
| QTRT2        | 0.303163278                            | N                                            | 0                                      | N                                   |
| DOCK1        | 0.303299561                            | N                                            | 1                                      | N                                   |
| FBXO10       | 0.303461346                            | N                                            | 0                                      | N                                   |

| Gene symbols | FDR (differential expression analysis) | Differentially expressed gene? Y, Yes; N, No | Number of insulin related publications | Insulin related gene? Y, Yes; N, No |
|--------------|----------------------------------------|----------------------------------------------|----------------------------------------|-------------------------------------|
| ZNF14        | 0.303461346                            | N                                            | 0                                      | N                                   |
| STAG3L2      | 0.303510462                            | N                                            | 0                                      | N                                   |
| DEK          | 0.303520641                            | N                                            | 4                                      | N                                   |
| POLA2        | 0.303520641                            | N                                            | 0                                      | N                                   |
| MAPK14       | 0.303819049                            | N                                            | 28                                     | N                                   |
| TRPM7        | 0.303905441                            | N                                            | 12                                     | N                                   |
| AC012313.5   | 0.30391059                             | N                                            | 0                                      | N                                   |
| AC011498.7   | 0.304399188                            | N                                            | 0                                      | N                                   |
| AL139317.2   | 0.304399188                            | N                                            | 0                                      | N                                   |
| DFFBP1       | 0.304399188                            | N                                            | 0                                      | N                                   |
| LRRC45       | 0.304497826                            | N                                            | 0                                      | N                                   |
| AP005901.1   | 0.30450969                             | N                                            | 0                                      | N                                   |
| AP001412.1   | 0.304747707                            | N                                            | 0                                      | N                                   |
| CSF2RB       | 0.304752685                            | N                                            | 0                                      | N                                   |
| AC080188.1   | 0.304780109                            | N                                            | 0                                      | N                                   |
| PROSER3      | 0.304780109                            | N                                            | 0                                      | N                                   |
| SKA2         | 0.304780109                            | N                                            | 1                                      | N                                   |
| MEMO1P1      | 0.304890712                            | N                                            | 0                                      | N                                   |
| RHOBTB3      | 0.304890712                            | N                                            | 0                                      | N                                   |
| PAH          | 0.305309755                            | N                                            | 143                                    | Y                                   |
| AC005822.1   | 0.305775172                            | N                                            | 0                                      | N                                   |
| CENPH        | 0.305775172                            | N                                            | 0                                      | N                                   |
| AC092332.1   | 0.306099282                            | N                                            | 0                                      | N                                   |
| ABHD10       | 0.306139389                            | N                                            | 0                                      | N                                   |
| CSTF1        | 0.306139389                            | N                                            | 0                                      | N                                   |
| DHX16        | 0.306139389                            | N                                            | 0                                      | N                                   |
| LNPEP        | 0.306139389                            | N                                            | 6                                      | N                                   |
| PCAT14       | 0.306139389                            | N                                            | 0                                      | N                                   |
| NTRK3        | 0.306329236                            | N                                            | 14                                     | N                                   |
| THOC3        | 0.306329236                            | N                                            | 0                                      | N                                   |
| TRIM29       | 0.306329236                            | N                                            | 0                                      | N                                   |
| ZNF667       | 0.306329236                            | N                                            | 0                                      | N                                   |
| GAPDHP65     | 0.306333428                            | N                                            | 0                                      | N                                   |
| UBTF         | 0.306516785                            | N                                            | 0                                      | N                                   |
| SCN1B        | 0.30701661                             | N                                            | 2                                      | N                                   |
| ITIH3        | 0.307321784                            | N                                            | 1                                      | N                                   |
| EIF3LP1      | 0.307456796                            | N                                            | 0                                      | N                                   |
| ZNF487       | 0.307456796                            | N                                            | 0                                      | N                                   |
| AC092287.1   | 0.307488522                            | N                                            | 0                                      | N                                   |
| BMP7         | 0.307488522                            | N                                            | 80                                     | N                                   |
| PIM2         | 0.307629284                            | N                                            | 1                                      | N                                   |
| REXO1L1P     | 0.307629284                            | N                                            | 0                                      | N                                   |
| RPS6KA2      | 0.307629284                            | N                                            | 4                                      | N                                   |
| AC011374.2   | 0.307712447                            | N                                            | 0                                      | N                                   |
| BEST1        | 0.307712447                            | N                                            | 0                                      | N                                   |
| KANK1        | 0.307712447                            | N                                            | 3                                      | N                                   |
| MYCBP        | 0.307712447                            | N                                            | 3                                      | N                                   |
| RNVU1-15     | 0.307712447                            | N                                            | 0                                      | N                                   |
| RP11-15H20.6 | 0.307712447                            | N                                            | 0                                      | N                                   |
| SLC43A3      | 0.307712447                            | N                                            | 0                                      | N                                   |
| SMIM5        | 0.308058328                            | N                                            | 0                                      | N                                   |
| EHMT1-IT1    | 0.308523089                            | N                                            | 0                                      | N                                   |
| RCCD1        | 0.308523089                            | N                                            | 0                                      | N                                   |
| CORO1A       | 0.30854039                             | N                                            | 1                                      | N                                   |
| SMAD4        | 0.308709068                            | N                                            | 50                                     | N                                   |
| CCR5         | 0.309181762                            | N                                            | 54                                     | N                                   |
| FBXL2        | 0.309181762                            | N                                            | 2                                      | N                                   |
| HPCA         | 0.309193205                            | N                                            | 1                                      | N                                   |
| CTAGE7P      | 0.309674682                            | N                                            | 0                                      | N                                   |
| SH3PXD2B     | 0.309674682                            | N                                            | 1                                      | N                                   |
| AC093726.1   | 0.310240101                            | N                                            | 0                                      | N                                   |
| AC015849.5   | 0.3106759                              | N                                            | 0                                      | N                                   |
| EFNA1        | 0.3106759                              | N                                            | 3                                      | N                                   |
| GLRA3        | 0.3106759                              | N                                            | 0                                      | N                                   |
| MGARP        | 0.3106759                              | N                                            | 0                                      | N                                   |
| MXRA5        | 0.3106759                              | N                                            | 2                                      | N                                   |

| Gene symbols | FDR (differential expression analysis) | Differentially expressed gene? Y, Yes; N, No | Number of insulin related publications | Insulin related gene? Y, Yes; N, No |
|--------------|----------------------------------------|----------------------------------------------|----------------------------------------|-------------------------------------|
| NOMO1        | 0.3106759                              | N                                            | 0                                      | N                                   |
| TPD52L1      | 0.3106759                              | N                                            | 2                                      | N                                   |
| UBFD1        | 0.3106759                              | N                                            | 0                                      | N                                   |
| ZNF84        | 0.3106759                              | N                                            | 0                                      | N                                   |
| SDHAF3       | 0.310913268                            | N                                            | 0                                      | N                                   |
| AC037198.2   | 0.311180352                            | N                                            | 0                                      | N                                   |
| AC097499.1   | 0.311180352                            | N                                            | 0                                      | N                                   |
| C1QTNF4      | 0.311180352                            | N                                            | 0                                      | N                                   |
| CDC5L        | 0.311180352                            | N                                            | 1                                      | N                                   |
| CTPS1        | 0.311180352                            | N                                            | 0                                      | N                                   |
| DCAF5        | 0.311180352                            | N                                            | 0                                      | N                                   |
| NAGA         | 0.311180352                            | N                                            | 8                                      | N                                   |
| PDZD4        | 0.311180352                            | N                                            | 0                                      | N                                   |
| PPFIBP1      | 0.311180352                            | N                                            | 0                                      | N                                   |
| TMEM119      | 0.311180352                            | N                                            | 4                                      | N                                   |
| TIMM10       | 0.311335978                            | N                                            | 0                                      | N                                   |
| AC009299.1   | 0.311375234                            | N                                            | 0                                      | N                                   |
| AL020997.3   | 0.311375234                            | N                                            | 0                                      | N                                   |
| ALPL         | 0.311375234                            | N                                            | 14                                     | N                                   |
| BICRA        | 0.311375234                            | N                                            | 0                                      | N                                   |
| EXOC4        | 0.311375234                            | N                                            | 3                                      | N                                   |
| LINC00649    | 0.311375234                            | N                                            | 0                                      | N                                   |
| SMIM7        | 0.311375234                            | N                                            | 0                                      | N                                   |
| SYNGR1       | 0.311375234                            | N                                            | 0                                      | N                                   |
| TBC1D20      | 0.311375234                            | N                                            | 0                                      | N                                   |
| GBAP1        | 0.311376307                            | N                                            | 0                                      | N                                   |
| RN7SL535P    | 0.311376307                            | N                                            | 0                                      | N                                   |
| ZNF717       | 0.311376307                            | N                                            | 1                                      | N                                   |
| DNAJB4       | 0.311467378                            | N                                            | 1                                      | N                                   |
| ZNF462       | 0.311493798                            | N                                            | 0                                      | N                                   |
| CLK4         | 0.311775284                            | N                                            | 0                                      | N                                   |
| RAD21L1      | 0.311888106                            | N                                            | 0                                      | N                                   |
| RFC2         | 0.311888106                            | N                                            | 1                                      | N                                   |
| ZNF69        | 0.311888106                            | N                                            | 0                                      | N                                   |
| MRPS7        | 0.312144069                            | N                                            | 0                                      | N                                   |
| NCAPD3       | 0.313013945                            | N                                            | 0                                      | N                                   |
| NFAT5        | 0.313417853                            | N                                            | 7                                      | N                                   |
| HNRNPM       | 0.313444539                            | N                                            | 1                                      | N                                   |
| LINC01606    | 0.313444539                            | N                                            | 0                                      | N                                   |
| NAALADL2     | 0.313444539                            | N                                            | 0                                      | N                                   |
| TARDBP       | 0.313444539                            | N                                            | 1                                      | N                                   |
| ZNF277       | 0.313444539                            | N                                            | 0                                      | N                                   |
| ABCA8        | 0.313457432                            | N                                            | 2                                      | N                                   |
| ACKR4        | 0.313457432                            | N                                            | 0                                      | N                                   |
| TOMM20P4     | 0.313535407                            | N                                            | 0                                      | N                                   |
| AL157791.1   | 0.313740303                            | N                                            | 0                                      | N                                   |
| C11orf96     | 0.313740303                            | N                                            | 0                                      | N                                   |
| KISS1        | 0.313740303                            | N                                            | 89                                     | N                                   |
| LIPJ         | 0.313740303                            | N                                            | 0                                      | N                                   |
| MGAT4C       | 0.313740303                            | N                                            | 0                                      | N                                   |
| NUP93        | 0.313740303                            | N                                            | 0                                      | N                                   |
| SSRP1        | 0.313740303                            | N                                            | 0                                      | N                                   |
| THBS3        | 0.313740303                            | N                                            | 1                                      | N                                   |
| WDFY3-AS2    | 0.313740303                            | N                                            | 0                                      | N                                   |
| AC134772.1   | 0.314003349                            | N                                            | 0                                      | N                                   |
| DPYSL2       | 0.314003349                            | N                                            | 0                                      | N                                   |
| GOLGA8R      | 0.314003349                            | N                                            | 0                                      | N                                   |
| UBE2H        | 0.314003349                            | N                                            | 2                                      | N                                   |
| TRIM13       | 0.314268609                            | N                                            | 0                                      | N                                   |
| AC092868.2   | 0.314287717                            | N                                            | 0                                      | N                                   |
| AC018634.1   | 0.314361853                            | N                                            | 0                                      | N                                   |
| LINC02197    | 0.314429167                            | N                                            | 0                                      | N                                   |
| AL390195.2   | 0.314654304                            | N                                            | 0                                      | N                                   |
| PCDHA5       | 0.314654304                            | N                                            | 0                                      | N                                   |
| TMEM71       | 0.314654304                            | N                                            | 0                                      | N                                   |
| XAF1         | 0.314654304                            | N                                            | 1                                      | N                                   |

| Gene symbols | FDR (differential expression analysis) | Differentially expressed gene? Y, Yes; N, No | Number of insulin related publications | Insulin related gene? Y, Yes; N, No |
|--------------|----------------------------------------|----------------------------------------------|----------------------------------------|-------------------------------------|
| ZNF663P      | 0.314654304                            | N                                            | 0                                      | N                                   |
| GNAZ         | 0.314702093                            | N                                            | 4                                      | N                                   |
| PRPF31       | 0.314880527                            | N                                            | 0                                      | N                                   |
| RPAP2        | 0.314880527                            | N                                            | 0                                      | N                                   |
| CACUL1       | 0.314952906                            | N                                            | 0                                      | N                                   |
| CENPJ        | 0.314952906                            | N                                            | 0                                      | N                                   |
| MAGOH3P      | 0.314952906                            | N                                            | 0                                      | N                                   |
| ZNF573       | 0.314952906                            | N                                            | 0                                      | N                                   |
| PDZRN3       | 0.315251499                            | N                                            | 0                                      | N                                   |
| AL158206.1   | 0.315269814                            | N                                            | 0                                      | N                                   |
| SEC23IP      | 0.315269814                            | N                                            | 0                                      | N                                   |
| AC069185.1   | 0.315386698                            | N                                            | 0                                      | N                                   |
| AC243964.3   | 0.315386698                            | N                                            | 0                                      | N                                   |
| HIBADH       | 0.315695173                            | N                                            | 1                                      | N                                   |
| TSPAN31      | 0.315756258                            | N                                            | 0                                      | N                                   |
| ERHP1        | 0.316135379                            | N                                            | 0                                      | N                                   |
| MARCH10      | 0.3161385                              | N                                            | 0                                      | N                                   |
| AC011742.2   | 0.3161385                              | N                                            | 0                                      | N                                   |
| CREBRF       | 0.3161385                              | N                                            | 0                                      | N                                   |
| ELAC2        | 0.3161385                              | N                                            | 0                                      | N                                   |
| GTF2I        | 0.3161385                              | N                                            | 1                                      | N                                   |
| KLHL28       | 0.3161385                              | N                                            | 0                                      | N                                   |
| LSMEM1       | 0.3161385                              | N                                            | 0                                      | N                                   |
| OSBPL9P2     | 0.3161385                              | N                                            | 0                                      | N                                   |
| PSG1         | 0.3161385                              | N                                            | 0                                      | N                                   |
| PWAR5        | 0.3161385                              | N                                            | 0                                      | N                                   |
| SERBP1P5     | 0.3161385                              | N                                            | 0                                      | N                                   |
| TRIM80P      | 0.3161385                              | N                                            | 0                                      | N                                   |
| XRCC5        | 0.3161385                              | N                                            | 5                                      | N                                   |
| H2AFZP3      | 0.316152353                            | N                                            | 0                                      | N                                   |
| VDAC3P1      | 0.316152353                            | N                                            | 0                                      | N                                   |
| AL365205.1   | 0.316200953                            | N                                            | 0                                      | N                                   |
| KIF24        | 0.316243334                            | N                                            | 0                                      | N                                   |
| AC016394.1   | 0.316354253                            | N                                            | 0                                      | N                                   |
| RPL36AP33    | 0.316524494                            | N                                            | 0                                      | N                                   |
| ASAH1        | 0.316535791                            | N                                            | 5                                      | N                                   |
| CCSAP        | 0.316535791                            | N                                            | 0                                      | N                                   |
| PCOLCE2      | 0.31654211                             | N                                            | 1                                      | N                                   |
| APC2         | 0.316931816                            | N                                            | 1                                      | N                                   |
| AC005261.2   | 0.316968056                            | N                                            | 0                                      | N                                   |
| AC008817.1   | 0.316968056                            | N                                            | 0                                      | N                                   |
| AL137100.1   | 0.316968056                            | N                                            | 0                                      | N                                   |
| FOXD3        | 0.316968056                            | N                                            | 6                                      | N                                   |
| IRF2BP2      | 0.316968056                            | N                                            | 2                                      | N                                   |
| JAM3         | 0.316968056                            | N                                            | 0                                      | N                                   |
| LINC02444    | 0.316968056                            | N                                            | 0                                      | N                                   |
| LIPG         | 0.316968056                            | N                                            | 13                                     | N                                   |
| LRRC27       | 0.316968056                            | N                                            | 0                                      | N                                   |
| PRLHR        | 0.316968056                            | N                                            | 1                                      | N                                   |
| SAT1         | 0.316968056                            | N                                            | 4                                      | N                                   |
| TJP1         | 0.316968056                            | N                                            | 29                                     | N                                   |
| ZNF606       | 0.316968056                            | N                                            | 0                                      | N                                   |
| ELAVL1       | 0.317299302                            | N                                            | 8                                      | N                                   |
| RAD51AP1P1   | 0.317299302                            | N                                            | 0                                      | N                                   |
| TRAF3IP3     | 0.317299302                            | N                                            | 0                                      | N                                   |
| AC068870.2   | 0.317663305                            | N                                            | 0                                      | N                                   |
| AP001157.1   | 0.317663305                            | N                                            | 0                                      | N                                   |
| SNHG21       | 0.317691343                            | N                                            | 0                                      | N                                   |
| TBC1D8-AS1   | 0.31789748                             | N                                            | 0                                      | N                                   |
| ARHGAP5      | 0.318065136                            | N                                            | 6                                      | N                                   |
| ADPGK-AS1    | 0.318139505                            | N                                            | 0                                      | N                                   |
| BCL2L12      | 0.318139505                            | N                                            | 0                                      | N                                   |
| CCDC141      | 0.318139505                            | N                                            | 0                                      | N                                   |
| COPRS        | 0.318139505                            | N                                            | 0                                      | N                                   |
| DAZAP1       | 0.318139505                            | N                                            | 0                                      | N                                   |
| DOCK4-AS1    | 0.318139505                            | N                                            | 0                                      | N                                   |

| Gene symbols  | FDR (differential expression analysis) | Differentially expressed gene? Y, Yes; N, No | Number of insulin related publications | Insulin related gene? Y, Yes; N, No |
|---------------|----------------------------------------|----------------------------------------------|----------------------------------------|-------------------------------------|
| GBP3          | 0.318139505                            | N                                            | 3                                      | N                                   |
| GS1-24F4.2    | 0.318139505                            | N                                            | 0                                      | N                                   |
| MCM8          | 0.318139505                            | N                                            | 1                                      | N                                   |
| PRKAB2        | 0.318139505                            | N                                            | 8                                      | N                                   |
| PRNP          | 0.318139505                            | N                                            | 5                                      | N                                   |
| PYM1          | 0.318139505                            | N                                            | 0                                      | N                                   |
| RAD21         | 0.318139505                            | N                                            | 4                                      | N                                   |
| RASSF1        | 0.318139505                            | N                                            | 7                                      | N                                   |
| RP11-210K20.4 | 0.318139505                            | N                                            | 0                                      | N                                   |
| RPL9          | 0.318139505                            | N                                            | 0                                      | N                                   |
| SALL4P7       | 0.318139505                            | N                                            | 0                                      | N                                   |
| UQCC3         | 0.318139505                            | N                                            | 0                                      | N                                   |
| FAM102B       | 0.318782698                            | N                                            | 0                                      | N                                   |
| HORMAD1       | 0.319168077                            | N                                            | 1                                      | N                                   |
| CEMIP         | 0.319313226                            | N                                            | 0                                      | N                                   |
| STX18-AS1     | 0.319467514                            | N                                            | 0                                      | N                                   |
| DNM1P41       | 0.319472277                            | N                                            | 0                                      | N                                   |
| AL049838.1    | 0.319660702                            | N                                            | 0                                      | N                                   |
| AL355615.1    | 0.319660702                            | N                                            | 0                                      | N                                   |
| ARSD          | 0.319660702                            | N                                            | 0                                      | N                                   |
| GUCD1         | 0.319660702                            | N                                            | 0                                      | N                                   |
| LIG1          | 0.319660702                            | N                                            | 0                                      | N                                   |
| TTI2          | 0.319660702                            | N                                            | 0                                      | N                                   |
| AKAP7         | 0.319667972                            | N                                            | 3                                      | N                                   |
| NDUFC1        | 0.319767554                            | N                                            | 0                                      | N                                   |
| PDE1C         | 0.319767554                            | N                                            | 5                                      | N                                   |
| TMEM57        | 0.319776003                            | N                                            | 0                                      | N                                   |
| AC027682.7    | 0.319842578                            | N                                            | 0                                      | N                                   |
| AF201337.1    | 0.320080567                            | N                                            | 0                                      | N                                   |
| LG14          | 0.320080567                            | N                                            | 0                                      | N                                   |
| SLC7A6OS      | 0.320080567                            | N                                            | 0                                      | N                                   |
| AC105917.1    | 0.320749014                            | N                                            | 0                                      | N                                   |
| HNF1A         | 0.320749014                            | N                                            | 382                                    | Y                                   |
| ZNF461        | 0.321009843                            | N                                            | 0                                      | N                                   |
| PRKCE         | 0.321230983                            | N                                            | 46                                     | N                                   |
| AC084117.1    | 0.321578665                            | N                                            | 0                                      | N                                   |
| ACBD7         | 0.321578665                            | N                                            | 0                                      | N                                   |
| AC068669.1    | 0.321737102                            | N                                            | 0                                      | N                                   |
| NUPR1         | 0.321737102                            | N                                            | 9                                      | N                                   |
| PSTPIP2       | 0.321737102                            | N                                            | 0                                      | N                                   |
| SAMD8         | 0.321737102                            | N                                            | 0                                      | N                                   |
| SLC5A1        | 0.321737102                            | N                                            | 82                                     | N                                   |
| AC134775.1    | 0.321826897                            | N                                            | 0                                      | N                                   |
| SLFNL1-AS1    | 0.321929701                            | N                                            | 0                                      | N                                   |
| AC034111.1    | 0.321957552                            | N                                            | 0                                      | N                                   |
| DDX11         | 0.321957552                            | N                                            | 0                                      | N                                   |
| ITSN1         | 0.321957552                            | N                                            | 0                                      | N                                   |
| AC006020.1    | 0.322036763                            | N                                            | 0                                      | N                                   |
| AC007953.1    | 0.322036763                            | N                                            | 0                                      | N                                   |
| AC013448.1    | 0.322036763                            | N                                            | 0                                      | N                                   |
| AC016722.3    | 0.322036763                            | N                                            | 0                                      | N                                   |
| AL354813.1    | 0.322036763                            | N                                            | 0                                      | N                                   |
| AL356218.2    | 0.322036763                            | N                                            | 0                                      | N                                   |
| AL360169.2    | 0.322036763                            | N                                            | 0                                      | N                                   |
| ALDH8A1       | 0.322036763                            | N                                            | 0                                      | N                                   |
| ARHGEF7       | 0.322036763                            | N                                            | 1                                      | N                                   |
| ATXN7L3B      | 0.322036763                            | N                                            | 0                                      | N                                   |
| BDH2P1        | 0.322036763                            | N                                            | 0                                      | N                                   |
| BOD1L2        | 0.322036763                            | N                                            | 0                                      | N                                   |
| BTBD7         | 0.322036763                            | N                                            | 0                                      | N                                   |
| CACNA1C-IT3   | 0.322036763                            | N                                            | 0                                      | N                                   |
| CALB2         | 0.322036763                            | N                                            | 7                                      | N                                   |
| CORT          | 0.322036763                            | N                                            | 139                                    | Y                                   |
| COX20P1       | 0.322036763                            | N                                            | 0                                      | N                                   |
| DCTN4         | 0.322036763                            | N                                            | 0                                      | N                                   |
| EIF2B2        | 0.322036763                            | N                                            | 39                                     | N                                   |



| Gene symbols | FDR (differential expression analysis) | Differentially expressed gene? Y, Yes; N, No | Number of insulin related publications | Insulin related gene? Y, Yes; N, No |
|--------------|----------------------------------------|----------------------------------------------|----------------------------------------|-------------------------------------|
| EIF4EBP2     | 0.322036763                            | N                                            | 14                                     | N                                   |
| ERCC6L       | 0.322036763                            | N                                            | 0                                      | N                                   |
| FTH1         | 0.322036763                            | N                                            | 1                                      | N                                   |
| GPR19        | 0.322036763                            | N                                            | 0                                      | N                                   |
| HACD3        | 0.322036763                            | N                                            | 1                                      | N                                   |
| HNRNPLP2     | 0.322036763                            | N                                            | 0                                      | N                                   |
| KF459542.1   | 0.322036763                            | N                                            | 0                                      | N                                   |
| LINC02148    | 0.322036763                            | N                                            | 0                                      | N                                   |
| LINC02225    | 0.322036763                            | N                                            | 0                                      | N                                   |
| LRP10        | 0.322036763                            | N                                            | 1                                      | N                                   |
| MCM7         | 0.322036763                            | N                                            | 3                                      | N                                   |
| METTL3       | 0.322036763                            | N                                            | 5                                      | N                                   |
| MRPL20       | 0.322036763                            | N                                            | 0                                      | N                                   |
| MUC3A        | 0.322036763                            | N                                            | 0                                      | N                                   |
| NDEL1        | 0.322036763                            | N                                            | 1                                      | N                                   |
| PCDHB19P     | 0.322036763                            | N                                            | 0                                      | N                                   |
| PCED1B       | 0.322036763                            | N                                            | 0                                      | N                                   |
| PDCD5P1      | 0.322036763                            | N                                            | 0                                      | N                                   |
| PKN3         | 0.322036763                            | N                                            | 0                                      | N                                   |
| PLD5         | 0.322036763                            | N                                            | 0                                      | N                                   |
| POC5         | 0.322036763                            | N                                            | 1                                      | N                                   |
| PPIL1        | 0.322036763                            | N                                            | 0                                      | N                                   |
| PRELID2      | 0.322036763                            | N                                            | 0                                      | N                                   |
| PRO1804      | 0.322036763                            | N                                            | 0                                      | N                                   |
| RAD23BP1     | 0.322036763                            | N                                            | 0                                      | N                                   |
| RECQL4       | 0.322036763                            | N                                            | 1                                      | N                                   |
| REM1         | 0.322036763                            | N                                            | 0                                      | N                                   |
| SH3BP5-AS1   | 0.322036763                            | N                                            | 0                                      | N                                   |
| SLC17A5      | 0.322036763                            | N                                            | 0                                      | N                                   |
| SPART        | 0.322036763                            | N                                            | 0                                      | N                                   |
| SPPL3        | 0.322036763                            | N                                            | 0                                      | N                                   |
| STAT3        | 0.322036763                            | N                                            | 865                                    | Y                                   |
| SYNPO2L      | 0.322036763                            | N                                            | 0                                      | N                                   |
| TMEM56       | 0.322036763                            | N                                            | 1                                      | N                                   |
| TRAM1L1      | 0.322036763                            | N                                            | 0                                      | N                                   |
| TSSK1B       | 0.322036763                            | N                                            | 0                                      | N                                   |
| U62317.3     | 0.322036763                            | N                                            | 0                                      | N                                   |
| ZFP90        | 0.322036763                            | N                                            | 0                                      | N                                   |
| GDF6         | 0.322085629                            | N                                            | 2                                      | N                                   |
| FHDC1        | 0.32224702                             | N                                            | 0                                      | N                                   |
| ZNF527       | 0.32224702                             | N                                            | 0                                      | N                                   |
| FCHSD2       | 0.322801455                            | N                                            | 0                                      | N                                   |
| AC092159.2   | 0.323025606                            | N                                            | 0                                      | N                                   |
| AL079307.1   | 0.323025606                            | N                                            | 0                                      | N                                   |
| ARMCX3       | 0.323025606                            | N                                            | 1                                      | N                                   |
| CSPG4P12     | 0.323025606                            | N                                            | 0                                      | N                                   |
| DDI2         | 0.323025606                            | N                                            | 0                                      | N                                   |
| HERC2P8      | 0.323025606                            | N                                            | 0                                      | N                                   |
| HSPE1        | 0.323025606                            | N                                            | 1                                      | N                                   |
| MTUS1        | 0.323025606                            | N                                            | 3                                      | N                                   |
| SAC3D1       | 0.323025606                            | N                                            | 0                                      | N                                   |
| SLC33A1      | 0.323025606                            | N                                            | 2                                      | N                                   |
| ZNF77        | 0.323025606                            | N                                            | 0                                      | N                                   |
| COQ7         | 0.323266933                            | N                                            | 5                                      | N                                   |
| AC068898.2   | 0.323270727                            | N                                            | 0                                      | N                                   |
| FTX          | 0.323270727                            | N                                            | 0                                      | N                                   |
| PAWR         | 0.323270727                            | N                                            | 2                                      | N                                   |
| ZNF701       | 0.32327226                             | N                                            | 0                                      | N                                   |
| INTS2        | 0.323378884                            | N                                            | 0                                      | N                                   |
| AC009163.2   | 0.323639067                            | N                                            | 0                                      | N                                   |
| AL353763.2   | 0.323639067                            | N                                            | 0                                      | N                                   |
| C18orf65     | 0.323639067                            | N                                            | 0                                      | N                                   |
| CCNL2        | 0.323639067                            | N                                            | 0                                      | N                                   |
| CLEC12A      | 0.323639067                            | N                                            | 0                                      | N                                   |
| CTB-193M12.4 | 0.323639067                            | N                                            | 0                                      | N                                   |
| DKK3         | 0.323639067                            | N                                            | 7                                      | N                                   |

| Gene symbols | FDR (differential expression analysis) | Differentially expressed gene? Y, Yes; N, No | Number of insulin related publications | Insulin related gene? Y, Yes; N, No |
|--------------|----------------------------------------|----------------------------------------------|----------------------------------------|-------------------------------------|
| DPT          | 0.323639067                            | N                                            | 95                                     | N                                   |
| FAM183A      | 0.323639067                            | N                                            | 0                                      | N                                   |
| FAP          | 0.323639067                            | N                                            | 36                                     | N                                   |
| GPATCH8      | 0.323639067                            | N                                            | 0                                      | N                                   |
| HCG27        | 0.323639067                            | N                                            | 0                                      | N                                   |
| IMPG2        | 0.323639067                            | N                                            | 0                                      | N                                   |
| LINC02028    | 0.323639067                            | N                                            | 0                                      | N                                   |
| MAGED1       | 0.323639067                            | N                                            | 1                                      | N                                   |
| MED13        | 0.323639067                            | N                                            | 8                                      | N                                   |
| MSC          | 0.323639067                            | N                                            | 612                                    | Y                                   |
| QRSL1P2      | 0.323639067                            | N                                            | 0                                      | N                                   |
| TENM2        | 0.323639067                            | N                                            | 0                                      | N                                   |
| WDR4         | 0.323639067                            | N                                            | 1                                      | N                                   |
| WDR5B        | 0.323639067                            | N                                            | 0                                      | N                                   |
| ZDHHC17      | 0.323639067                            | N                                            | 2                                      | N                                   |
| ABCA11P      | 0.323859586                            | N                                            | 0                                      | N                                   |
| AC019294.2   | 0.323859586                            | N                                            | 0                                      | N                                   |
| ALDH9A1      | 0.323859586                            | N                                            | 1                                      | N                                   |
| BX255923.1   | 0.323859586                            | N                                            | 0                                      | N                                   |
| CLHC1        | 0.323859586                            | N                                            | 0                                      | N                                   |
| GNAS         | 0.323859586                            | N                                            | 39                                     | N                                   |
| HAUS5        | 0.323859586                            | N                                            | 0                                      | N                                   |
| INPP4A       | 0.323859586                            | N                                            | 2                                      | N                                   |
| KRT81        | 0.323859586                            | N                                            | 0                                      | N                                   |
| MRPS22       | 0.323859586                            | N                                            | 0                                      | N                                   |
| PIK3R3       | 0.323859586                            | N                                            | 10                                     | N                                   |
| SKA1         | 0.323859586                            | N                                            | 1                                      | N                                   |
| STAG3L5P     | 0.323859586                            | N                                            | 0                                      | N                                   |
| WDR5         | 0.323859586                            | N                                            | 6                                      | N                                   |
| ANKRD20A11P  | 0.323917417                            | N                                            | 0                                      | N                                   |
| SKA3         | 0.324192261                            | N                                            | 0                                      | N                                   |
| CDC14B       | 0.324549129                            | N                                            | 1                                      | N                                   |
| BRINP1       | 0.324775461                            | N                                            | 1                                      | N                                   |
| C1orf220     | 0.324775461                            | N                                            | 0                                      | N                                   |
| MATN4        | 0.324775461                            | N                                            | 0                                      | N                                   |
| PPP2R5A      | 0.324775461                            | N                                            | 0                                      | N                                   |
| SAAL1        | 0.324775461                            | N                                            | 0                                      | N                                   |
| SESN3        | 0.324775461                            | N                                            | 7                                      | N                                   |
| SULT1C2      | 0.324775461                            | N                                            | 1                                      | N                                   |
| ZNF366       | 0.324775461                            | N                                            | 0                                      | N                                   |
| ADH5         | 0.324893122                            | N                                            | 1                                      | N                                   |
| ARCN1        | 0.324893122                            | N                                            | 0                                      | N                                   |
| BRAF         | 0.324893122                            | N                                            | 98                                     | N                                   |
| CCDC146      | 0.324893122                            | N                                            | 0                                      | N                                   |
| CD28         | 0.324893122                            | N                                            | 88                                     | N                                   |
| CENPO        | 0.324893122                            | N                                            | 0                                      | N                                   |
| CYP2E1       | 0.324893122                            | N                                            | 145                                    | Y                                   |
| DIRAS1       | 0.324893122                            | N                                            | 0                                      | N                                   |
| FAM24B       | 0.324893122                            | N                                            | 0                                      | N                                   |
| HOXA-AS2     | 0.324893122                            | N                                            | 0                                      | N                                   |
| LAMB2        | 0.324893122                            | N                                            | 1                                      | N                                   |
| OSBP         | 0.324893122                            | N                                            | 7                                      | N                                   |
| PIANP        | 0.324893122                            | N                                            | 0                                      | N                                   |
| RHEBL1       | 0.324893122                            | N                                            | 4                                      | N                                   |
| SKIDA1       | 0.324893122                            | N                                            | 0                                      | N                                   |
| SUPT7L       | 0.324893122                            | N                                            | 0                                      | N                                   |
| TRAPPC6A     | 0.324893122                            | N                                            | 0                                      | N                                   |
| ZNF621       | 0.324893122                            | N                                            | 0                                      | N                                   |
| MRPL35       | 0.324923435                            | N                                            | 0                                      | N                                   |
| AC018521.7   | 0.325212371                            | N                                            | 0                                      | N                                   |
| AC092650.1   | 0.325212371                            | N                                            | 0                                      | N                                   |
| ADAM17       | 0.325212371                            | N                                            | 50                                     | N                                   |
| ADAP2        | 0.325212371                            | N                                            | 1                                      | N                                   |
| AL354719.2   | 0.325212371                            | N                                            | 0                                      | N                                   |
| AP000542.2   | 0.325212371                            | N                                            | 0                                      | N                                   |
| APLP2        | 0.325212371                            | N                                            | 7                                      | N                                   |

| Gene symbols  | FDR (differential expression analysis) | Differentially expressed gene? Y, Yes; N, No | Number of insulin related publications | Insulin related gene? Y, Yes; N, No |
|---------------|----------------------------------------|----------------------------------------------|----------------------------------------|-------------------------------------|
| DKFZp779M0652 | 0.325212371                            | N                                            | 0                                      | N                                   |
| DNAJB5        | 0.325212371                            | N                                            | 0                                      | N                                   |
| FANCC         | 0.325212371                            | N                                            | 3                                      | N                                   |
| FERP1         | 0.325212371                            | N                                            | 0                                      | N                                   |
| FOPNL         | 0.325212371                            | N                                            | 0                                      | N                                   |
| GPR26         | 0.325212371                            | N                                            | 0                                      | N                                   |
| GSTCD         | 0.325212371                            | N                                            | 0                                      | N                                   |
| HPSE          | 0.325212371                            | N                                            | 5                                      | N                                   |
| HTRA2         | 0.325212371                            | N                                            | 2                                      | N                                   |
| ITSN2         | 0.325212371                            | N                                            | 0                                      | N                                   |
| KRT8P12       | 0.325212371                            | N                                            | 0                                      | N                                   |
| MYRIP         | 0.325212371                            | N                                            | 8                                      | N                                   |
| MZT1          | 0.325212371                            | N                                            | 0                                      | N                                   |
| NCAPGP1       | 0.325212371                            | N                                            | 0                                      | N                                   |
| NUDC          | 0.325212371                            | N                                            | 1                                      | N                                   |
| PBX4          | 0.325212371                            | N                                            | 2                                      | N                                   |
| PDZD8         | 0.325212371                            | N                                            | 0                                      | N                                   |
| PPP1R10       | 0.325212371                            | N                                            | 1                                      | N                                   |
| PTPN4         | 0.325212371                            | N                                            | 2                                      | N                                   |
| RASAL2        | 0.325212371                            | N                                            | 0                                      | N                                   |
| RELL1         | 0.325212371                            | N                                            | 0                                      | N                                   |
| RP11-15N24.4  | 0.325212371                            | N                                            | 0                                      | N                                   |
| RTTN          | 0.325212371                            | N                                            | 0                                      | N                                   |
| SLIT1         | 0.325212371                            | N                                            | 3                                      | N                                   |
| SUFU          | 0.325212371                            | N                                            | 5                                      | N                                   |
| SVIP          | 0.325212371                            | N                                            | 1                                      | N                                   |
| TM2D1         | 0.325212371                            | N                                            | 0                                      | N                                   |
| VN1R1         | 0.325212371                            | N                                            | 0                                      | N                                   |
| ZNF248        | 0.325212371                            | N                                            | 0                                      | N                                   |
| BCL6          | 0.325266853                            | N                                            | 10                                     | N                                   |
| TFAMP1        | 0.325444761                            | N                                            | 0                                      | N                                   |
| VCL           | 0.325444761                            | N                                            | 8                                      | N                                   |
| ACSL5         | 0.325503896                            | N                                            | 6                                      | N                                   |
| AL138889.2    | 0.325503896                            | N                                            | 0                                      | N                                   |
| CCT5P1        | 0.325503896                            | N                                            | 0                                      | N                                   |
| DNAH2         | 0.325503896                            | N                                            | 0                                      | N                                   |
| DYDC1         | 0.325503896                            | N                                            | 0                                      | N                                   |
| KLHDC4        | 0.325503896                            | N                                            | 0                                      | N                                   |
| MARK3         | 0.325503896                            | N                                            | 2                                      | N                                   |
| MED22         | 0.325503896                            | N                                            | 0                                      | N                                   |
| PGA3          | 0.325503896                            | N                                            | 0                                      | N                                   |
| PLEK          | 0.325503896                            | N                                            | 1                                      | N                                   |
| SLC36A2       | 0.325503896                            | N                                            | 0                                      | N                                   |
| AC144521.1    | 0.325727731                            | N                                            | 0                                      | N                                   |
| EIF4A2P4      | 0.325749929                            | N                                            | 0                                      | N                                   |
| DMGDH         | 0.32577786                             | N                                            | 1                                      | N                                   |
| ADAM28        | 0.32593801                             | N                                            | 12                                     | N                                   |
| AC116021.1    | 0.326566026                            | N                                            | 0                                      | N                                   |
| ASS1P2        | 0.326566026                            | N                                            | 0                                      | N                                   |
| CCHCR1        | 0.326566026                            | N                                            | 1                                      | N                                   |
| KLHL24        | 0.326566026                            | N                                            | 0                                      | N                                   |
| LRRD1         | 0.326566026                            | N                                            | 0                                      | N                                   |
| NEU3          | 0.326566026                            | N                                            | 7                                      | N                                   |
| RFC5          | 0.326566026                            | N                                            | 1                                      | N                                   |
| SMIM12        | 0.326566026                            | N                                            | 0                                      | N                                   |
| AL021877.1    | 0.326595585                            | N                                            | 0                                      | N                                   |
| COL24A1       | 0.326595585                            | N                                            | 0                                      | N                                   |
| ELAVL4        | 0.326595585                            | N                                            | 8                                      | N                                   |
| H3F3C         | 0.326689488                            | N                                            | 0                                      | N                                   |
| CD46P1        | 0.326798989                            | N                                            | 0                                      | N                                   |
| AL139353.2    | 0.326998487                            | N                                            | 0                                      | N                                   |
| CCDC174       | 0.326998487                            | N                                            | 0                                      | N                                   |
| CYLC2         | 0.326998487                            | N                                            | 0                                      | N                                   |
| DIRC2         | 0.326998487                            | N                                            | 0                                      | N                                   |
| HAUS4         | 0.326998487                            | N                                            | 0                                      | N                                   |
| OPN5          | 0.326998487                            | N                                            | 0                                      | N                                   |

| Gene symbols  | FDR (differential expression analysis) | Differentially expressed gene? Y, Yes; N, No | Number of insulin related publications | Insulin related gene? Y, Yes; N, No |
|---------------|----------------------------------------|----------------------------------------------|----------------------------------------|-------------------------------------|
| RNASEH2C      | 0.326998487                            | N                                            | 1                                      | N                                   |
| SETD9         | 0.326998487                            | N                                            | 0                                      | N                                   |
| SOS2          | 0.326998487                            | N                                            | 3                                      | N                                   |
| SPAG1         | 0.326998487                            | N                                            | 0                                      | N                                   |
| TCP1          | 0.326998487                            | N                                            | 4                                      | N                                   |
| ZNF232        | 0.326998487                            | N                                            | 0                                      | N                                   |
| ZNF773        | 0.326998487                            | N                                            | 0                                      | N                                   |
| AC103987.3    | 0.32713975                             | N                                            | 0                                      | N                                   |
| LRRC8E        | 0.327247165                            | N                                            | 0                                      | N                                   |
| LRRK1         | 0.327247165                            | N                                            | 1                                      | N                                   |
| NLGN3         | 0.327247165                            | N                                            | 0                                      | N                                   |
| AC073465.1    | 0.327642058                            | N                                            | 0                                      | N                                   |
| NUP107        | 0.327907286                            | N                                            | 0                                      | N                                   |
| AC016734.2    | 0.328110692                            | N                                            | 0                                      | N                                   |
| C6orf201      | 0.328204983                            | N                                            | 0                                      | N                                   |
| RAB4B-EGLN2   | 0.328225594                            | N                                            | 0                                      | N                                   |
| SEPHS1P4      | 0.328225594                            | N                                            | 0                                      | N                                   |
| RPL15         | 0.328494098                            | N                                            | 1                                      | N                                   |
| LINC01230     | 0.328617081                            | N                                            | 0                                      | N                                   |
| AL139384.1    | 0.329074394                            | N                                            | 0                                      | N                                   |
| SNAP23        | 0.329074394                            | N                                            | 51                                     | N                                   |
| LINC01205     | 0.3291037                              | N                                            | 0                                      | N                                   |
| LRGUK         | 0.3291037                              | N                                            | 2                                      | N                                   |
| HIST2H2BF     | 0.329335897                            | N                                            | 0                                      | N                                   |
| TTC7B         | 0.329382492                            | N                                            | 0                                      | N                                   |
| ABCC3         | 0.32996488                             | N                                            | 8                                      | N                                   |
| AL606490.2    | 0.32996488                             | N                                            | 0                                      | N                                   |
| PTPRZ1        | 0.32996488                             | N                                            | 1                                      | N                                   |
| ZMYM4         | 0.32996488                             | N                                            | 0                                      | N                                   |
| HIST1H4A      | 0.330098409                            | N                                            | 0                                      | N                                   |
| MINDY1        | 0.330316639                            | N                                            | 0                                      | N                                   |
| AC091925.2    | 0.330352699                            | N                                            | 0                                      | N                                   |
| AP002884.5    | 0.330352699                            | N                                            | 0                                      | N                                   |
| CDC37L1       | 0.330352699                            | N                                            | 0                                      | N                                   |
| COL10A1       | 0.330352699                            | N                                            | 13                                     | N                                   |
| CT62          | 0.330352699                            | N                                            | 0                                      | N                                   |
| GTF3C5        | 0.330352699                            | N                                            | 0                                      | N                                   |
| LAPTM4A       | 0.330352699                            | N                                            | 0                                      | N                                   |
| AC010487.1    | 0.330731839                            | N                                            | 0                                      | N                                   |
| ALDH6A1       | 0.330731839                            | N                                            | 4                                      | N                                   |
| TDRD6         | 0.330731839                            | N                                            | 0                                      | N                                   |
| U3            | 0.330731839                            | N                                            | 9                                      | N                                   |
| HSPB11        | 0.330848973                            | N                                            | 1                                      | N                                   |
| LRRN4         | 0.330848973                            | N                                            | 0                                      | N                                   |
| PTPRT         | 0.330959657                            | N                                            | 1                                      | N                                   |
| DHRS13        | 0.33102035                             | N                                            | 0                                      | N                                   |
| AC018647.1    | 0.331277676                            | N                                            | 0                                      | N                                   |
| AL513325.1    | 0.331277676                            | N                                            | 0                                      | N                                   |
| BACH1         | 0.331277676                            | N                                            | 3                                      | N                                   |
| AC110285.6    | 0.3313373                              | N                                            | 0                                      | N                                   |
| NDUFA9        | 0.331856087                            | N                                            | 4                                      | N                                   |
| APCDD1        | 0.331932449                            | N                                            | 1                                      | N                                   |
| INTU          | 0.331980939                            | N                                            | 0                                      | N                                   |
| LHFPL3-AS2    | 0.331980939                            | N                                            | 0                                      | N                                   |
| BAMBI         | 0.332034497                            | N                                            | 4                                      | N                                   |
| TCEA3         | 0.33276246                             | N                                            | 0                                      | N                                   |
| NT5DC1        | 0.333044575                            | N                                            | 0                                      | N                                   |
| RASEF         | 0.333351392                            | N                                            | 0                                      | N                                   |
| AC007238.1    | 0.333781915                            | N                                            | 0                                      | N                                   |
| AC022296.1    | 0.333781915                            | N                                            | 0                                      | N                                   |
| AKR1B15       | 0.333781915                            | N                                            | 0                                      | N                                   |
| AL121652.1    | 0.333781915                            | N                                            | 0                                      | N                                   |
| AL603840.1    | 0.333781915                            | N                                            | 0                                      | N                                   |
| AP000842.3    | 0.333781915                            | N                                            | 0                                      | N                                   |
| BCL2L2-PABPN1 | 0.333781915                            | N                                            | 0                                      | N                                   |
| CBLL1         | 0.333781915                            | N                                            | 0                                      | N                                   |

| Gene symbols | FDR (differential expression analysis) | Differentially expressed gene? Y, Yes; N, No | Number of insulin related publications | Insulin related gene? Y, Yes; N, No |
|--------------|----------------------------------------|----------------------------------------------|----------------------------------------|-------------------------------------|
| CCNA1        | 0.333781915                            | N                                            | 4                                      | N                                   |
| DACT3        | 0.333781915                            | N                                            | 0                                      | N                                   |
| DANT2        | 0.333781915                            | N                                            | 0                                      | N                                   |
| DHRS12       | 0.333781915                            | N                                            | 0                                      | N                                   |
| FBN2         | 0.333781915                            | N                                            | 2                                      | N                                   |
| FKBP4        | 0.333781915                            | N                                            | 2                                      | N                                   |
| FOXN3        | 0.333781915                            | N                                            | 4                                      | N                                   |
| GOLPH3       | 0.333781915                            | N                                            | 2                                      | N                                   |
| GRK6         | 0.333781915                            | N                                            | 4                                      | N                                   |
| H2AFZ        | 0.333781915                            | N                                            | 0                                      | N                                   |
| H2AFZP6      | 0.333781915                            | N                                            | 0                                      | N                                   |
| ITGB4        | 0.333781915                            | N                                            | 1                                      | N                                   |
| MTCP1        | 0.333781915                            | N                                            | 0                                      | N                                   |
| NR1D2        | 0.333781915                            | N                                            | 4                                      | N                                   |
| NXNL2        | 0.333781915                            | N                                            | 0                                      | N                                   |
| PAGR1        | 0.333781915                            | N                                            | 1                                      | N                                   |
| PARD6A       | 0.333781915                            | N                                            | 2                                      | N                                   |
| PPM1G        | 0.333781915                            | N                                            | 3                                      | N                                   |
| RC3H2        | 0.333781915                            | N                                            | 0                                      | N                                   |
| RPL22        | 0.333781915                            | N                                            | 1                                      | N                                   |
| RPL7AP30     | 0.333781915                            | N                                            | 0                                      | N                                   |
| SCN4B        | 0.333781915                            | N                                            | 0                                      | N                                   |
| SUV39H2      | 0.333781915                            | N                                            | 0                                      | N                                   |
| SVEP1        | 0.333781915                            | N                                            | 0                                      | N                                   |
| TESK2        | 0.333781915                            | N                                            | 0                                      | N                                   |
| TICRR        | 0.333781915                            | N                                            | 0                                      | N                                   |
| TLK1         | 0.333781915                            | N                                            | 0                                      | N                                   |
| TMEM19       | 0.333781915                            | N                                            | 0                                      | N                                   |
| TNFRSF11B    | 0.333781915                            | N                                            | 100                                    | N                                   |
| VPS8         | 0.333781915                            | N                                            | 0                                      | N                                   |
| YIPF5        | 0.333781915                            | N                                            | 0                                      | N                                   |
| ZBTB44       | 0.333781915                            | N                                            | 0                                      | N                                   |
| AK8          | 0.333940385                            | N                                            | 0                                      | N                                   |
| REL          | 0.333940385                            | N                                            | 60                                     | N                                   |
| AC006504.8   | 0.333952851                            | N                                            | 0                                      | N                                   |
| AC078906.1   | 0.333952851                            | N                                            | 0                                      | N                                   |
| AC091940.1   | 0.333952851                            | N                                            | 0                                      | N                                   |
| AC099811.5   | 0.333952851                            | N                                            | 0                                      | N                                   |
| DMRT2        | 0.333952851                            | N                                            | 0                                      | N                                   |
| ER11         | 0.333952851                            | N                                            | 0                                      | N                                   |
| LINC00565    | 0.333952851                            | N                                            | 0                                      | N                                   |
| LRRC4C       | 0.333952851                            | N                                            | 0                                      | N                                   |
| PRSS23       | 0.333952851                            | N                                            | 0                                      | N                                   |
| SMPDL3A      | 0.333952851                            | N                                            | 0                                      | N                                   |
| LINC01788    | 0.334202234                            | N                                            | 0                                      | N                                   |
| AC091804.1   | 0.334231108                            | N                                            | 0                                      | N                                   |
| ATMIN        | 0.334231108                            | N                                            | 4                                      | N                                   |
| BORCS7       | 0.334231108                            | N                                            | 0                                      | N                                   |
| CKAP2L       | 0.334231108                            | N                                            | 0                                      | N                                   |
| DCTN3        | 0.334231108                            | N                                            | 0                                      | N                                   |
| ITPRIPL1     | 0.334231108                            | N                                            | 0                                      | N                                   |
| MYOF         | 0.334231108                            | N                                            | 0                                      | N                                   |
| NDST1        | 0.334231108                            | N                                            | 1                                      | N                                   |
| QPRT         | 0.334231108                            | N                                            | 0                                      | N                                   |
| TMEM268      | 0.334231108                            | N                                            | 0                                      | N                                   |
| TRAF6        | 0.334231108                            | N                                            | 40                                     | N                                   |
| RPL34P18     | 0.334279421                            | N                                            | 0                                      | N                                   |
| UCHL1        | 0.334552329                            | N                                            | 18                                     | N                                   |
| ZNF225       | 0.334552329                            | N                                            | 0                                      | N                                   |
| ZNF283       | 0.334552329                            | N                                            | 0                                      | N                                   |
| AC018371.2   | 0.334825759                            | N                                            | 0                                      | N                                   |
| AL136981.2   | 0.334825759                            | N                                            | 0                                      | N                                   |
| DNAJB1       | 0.334825759                            | N                                            | 5                                      | N                                   |
| GPD1         | 0.334825759                            | N                                            | 10                                     | N                                   |
| KHK          | 0.334825759                            | N                                            | 6                                      | N                                   |
| SLC6A6P1     | 0.334957342                            | N                                            | 0                                      | N                                   |

| Gene symbols  | FDR (differential expression analysis) | Differentially expressed gene? Y, Yes; N, No | Number of insulin related publications | Insulin related gene? Y, Yes; N, No |
|---------------|----------------------------------------|----------------------------------------------|----------------------------------------|-------------------------------------|
| AC069222.1    | 0.335210817                            | N                                            | 0                                      | N                                   |
| AC022405.1    | 0.335385419                            | N                                            | 0                                      | N                                   |
| AC092967.1    | 0.335385419                            | N                                            | 0                                      | N                                   |
| ADRA2A        | 0.335385419                            | N                                            | 359                                    | Y                                   |
| LBHD1         | 0.335385419                            | N                                            | 0                                      | N                                   |
| POLR2H        | 0.335385419                            | N                                            | 0                                      | N                                   |
| PTK2B         | 0.335385419                            | N                                            | 16                                     | N                                   |
| SOD2          | 0.335733202                            | N                                            | 109                                    | Y                                   |
| CORIN         | 0.335847732                            | N                                            | 13                                     | N                                   |
| PPP1R3B       | 0.335847732                            | N                                            | 17                                     | N                                   |
| MRLN          | 0.336562067                            | N                                            | 0                                      | N                                   |
| RN7SL784P     | 0.33672115                             | N                                            | 0                                      | N                                   |
| AC005899.8    | 0.336755655                            | N                                            | 0                                      | N                                   |
| AL132656.4    | 0.336755655                            | N                                            | 0                                      | N                                   |
| C8orf46       | 0.336755655                            | N                                            | 0                                      | N                                   |
| GABRA3        | 0.336755655                            | N                                            | 0                                      | N                                   |
| HSPB7         | 0.336755655                            | N                                            | 1                                      | N                                   |
| IGF2R         | 0.336755655                            | N                                            | 402                                    | Y                                   |
| PCDHGC3       | 0.336755655                            | N                                            | 0                                      | N                                   |
| POLR2F        | 0.336755655                            | N                                            | 0                                      | N                                   |
| POU6F2        | 0.336755655                            | N                                            | 0                                      | N                                   |
| SLC39A10      | 0.336755655                            | N                                            | 1                                      | N                                   |
| BMS1P20       | 0.336906673                            | N                                            | 0                                      | N                                   |
| UBXN2B        | 0.336906673                            | N                                            | 0                                      | N                                   |
| ICOSLG        | 0.337126062                            | N                                            | 0                                      | N                                   |
| ITGB3         | 0.337126062                            | N                                            | 15                                     | N                                   |
| N4BP2L2       | 0.337126062                            | N                                            | 0                                      | N                                   |
| AC019178.1    | 0.337168233                            | N                                            | 0                                      | N                                   |
| FAM13A-AS1    | 0.337168233                            | N                                            | 0                                      | N                                   |
| HEG1          | 0.337168233                            | N                                            | 1                                      | N                                   |
| HEPH          | 0.337168233                            | N                                            | 3                                      | N                                   |
| PTP4A3        | 0.337168233                            | N                                            | 0                                      | N                                   |
| SIRT4         | 0.337168233                            | N                                            | 29                                     | N                                   |
| SLCO3A1       | 0.337168233                            | N                                            | 0                                      | N                                   |
| TARBP2        | 0.337168233                            | N                                            | 0                                      | N                                   |
| CDC14C        | 0.337347671                            | N                                            | 0                                      | N                                   |
| LINC01492     | 0.337347671                            | N                                            | 0                                      | N                                   |
| ZNF653        | 0.337347671                            | N                                            | 0                                      | N                                   |
| AC009054.1    | 0.337379069                            | N                                            | 0                                      | N                                   |
| AL133268.1    | 0.337379069                            | N                                            | 0                                      | N                                   |
| CEP89         | 0.337379069                            | N                                            | 0                                      | N                                   |
| FAM81A        | 0.337379069                            | N                                            | 0                                      | N                                   |
| LINC01852     | 0.337379069                            | N                                            | 0                                      | N                                   |
| RP11-175O19.4 | 0.337379069                            | N                                            | 0                                      | N                                   |
| ZNF699        | 0.337379069                            | N                                            | 0                                      | N                                   |
| LIN9          | 0.337485152                            | N                                            | 0                                      | N                                   |
| BRCA2         | 0.337569064                            | N                                            | 44                                     | N                                   |
| DYNC2LI1      | 0.337569064                            | N                                            | 0                                      | N                                   |
| ERI2          | 0.337569064                            | N                                            | 0                                      | N                                   |
| ERCC3         | 0.337705971                            | N                                            | 2                                      | N                                   |
| RPL34-AS1     | 0.337705971                            | N                                            | 0                                      | N                                   |
| BUB3          | 0.337906685                            | N                                            | 0                                      | N                                   |
| AC112777.1    | 0.337965253                            | N                                            | 0                                      | N                                   |
| GRP           | 0.337965253                            | N                                            | 153                                    | Y                                   |
| HMGCLL1       | 0.337965253                            | N                                            | 0                                      | N                                   |
| VLDLR-AS1     | 0.337965253                            | N                                            | 0                                      | N                                   |
| GSTM5P1       | 0.338343252                            | N                                            | 0                                      | N                                   |
| IL20RA        | 0.338343252                            | N                                            | 1                                      | N                                   |
| BPTF          | 0.338602808                            | N                                            | 0                                      | N                                   |
| TAOK3         | 0.338602808                            | N                                            | 0                                      | N                                   |
| ATAD1         | 0.338629486                            | N                                            | 0                                      | N                                   |
| AC026356.2    | 0.338738724                            | N                                            | 0                                      | N                                   |
| AC079322.1    | 0.338738724                            | N                                            | 0                                      | N                                   |
| AP000350.6    | 0.338738724                            | N                                            | 0                                      | N                                   |
| ARMCX1        | 0.338738724                            | N                                            | 0                                      | N                                   |
| DLG3          | 0.338738724                            | N                                            | 1                                      | N                                   |

| Gene symbols | FDR (differential expression analysis) | Differentially expressed gene? Y, Yes; N, No | Number of insulin related publications | Insulin related gene? Y, Yes; N, No |
|--------------|----------------------------------------|----------------------------------------------|----------------------------------------|-------------------------------------|
| FAM96AP2     | 0.338738724                            | N                                            | 0                                      | N                                   |
| MORF4L1      | 0.338738724                            | N                                            | 0                                      | N                                   |
| NCAPH2       | 0.338738724                            | N                                            | 0                                      | N                                   |
| PDZPH1P      | 0.338738724                            | N                                            | 0                                      | N                                   |
| SHMT1        | 0.338738724                            | N                                            | 1                                      | N                                   |
| TUBAP2       | 0.338738724                            | N                                            | 0                                      | N                                   |
| AC115284.2   | 0.338958912                            | N                                            | 0                                      | N                                   |
| EVA1A        | 0.338958912                            | N                                            | 1                                      | N                                   |
| FGD6         | 0.338958912                            | N                                            | 0                                      | N                                   |
| MAZ          | 0.338958912                            | N                                            | 4                                      | N                                   |
| RABL6        | 0.338958912                            | N                                            | 1                                      | N                                   |
| UBTD2        | 0.338958912                            | N                                            | 0                                      | N                                   |
| PIK3C2A      | 0.339107968                            | N                                            | 8                                      | N                                   |
| AC245014.3   | 0.339115305                            | N                                            | 0                                      | N                                   |
| AP001527.1   | 0.339115305                            | N                                            | 0                                      | N                                   |
| KMT5B        | 0.339115305                            | N                                            | 0                                      | N                                   |
| RPA3         | 0.339115305                            | N                                            | 0                                      | N                                   |
| EXOSC7       | 0.339496749                            | N                                            | 0                                      | N                                   |
| AGO1         | 0.339734876                            | N                                            | 5                                      | N                                   |
| AHCYL1       | 0.339734876                            | N                                            | 2                                      | N                                   |
| DLEU2        | 0.339734876                            | N                                            | 1                                      | N                                   |
| FBXO34       | 0.339734876                            | N                                            | 0                                      | N                                   |
| KLHL6-AS1    | 0.339734876                            | N                                            | 0                                      | N                                   |
| NASP         | 0.339734876                            | N                                            | 3                                      | N                                   |
| TNKS         | 0.339734876                            | N                                            | 11                                     | N                                   |
| CRB2         | 0.33978305                             | N                                            | 1                                      | N                                   |
| PCDHGB4      | 0.339801655                            | N                                            | 0                                      | N                                   |
| SLC41A1      | 0.339801655                            | N                                            | 1                                      | N                                   |
| STAT5B       | 0.339833024                            | N                                            | 154                                    | Y                                   |
| AC026355.1   | 0.339880648                            | N                                            | 0                                      | N                                   |
| AC096642.1   | 0.339880648                            | N                                            | 0                                      | N                                   |
| AL138762.1   | 0.339880648                            | N                                            | 0                                      | N                                   |
| AL445487.1   | 0.339880648                            | N                                            | 0                                      | N                                   |
| BNIP3L       | 0.339880648                            | N                                            | 7                                      | N                                   |
| DCUN1D3      | 0.339880648                            | N                                            | 0                                      | N                                   |
| MON2         | 0.339880648                            | N                                            | 0                                      | N                                   |
| PCDHGA5      | 0.339880648                            | N                                            | 0                                      | N                                   |
| PIGP         | 0.339880648                            | N                                            | 0                                      | N                                   |
| RPA1         | 0.339880648                            | N                                            | 1                                      | N                                   |
| SIPA1L1      | 0.339880648                            | N                                            | 0                                      | N                                   |
| SNORA59B     | 0.339880648                            | N                                            | 0                                      | N                                   |
| SYNE2        | 0.339880648                            | N                                            | 0                                      | N                                   |
| ZNF792       | 0.339880648                            | N                                            | 0                                      | N                                   |
| LAYN         | 0.340136373                            | N                                            | 1                                      | N                                   |
| FBLN2        | 0.340255263                            | N                                            | 0                                      | N                                   |
| SMG7         | 0.340255263                            | N                                            | 0                                      | N                                   |
| SSTR2        | 0.340255263                            | N                                            | 93                                     | N                                   |
| ZFAND3       | 0.340255263                            | N                                            | 4                                      | N                                   |
| AC074138.1   | 0.34043605                             | N                                            | 0                                      | N                                   |
| GPRIN2       | 0.34043605                             | N                                            | 0                                      | N                                   |
| NKPD1        | 0.34043605                             | N                                            | 0                                      | N                                   |
| RANGRF       | 0.34043605                             | N                                            | 1                                      | N                                   |
| UBALD2       | 0.34043605                             | N                                            | 0                                      | N                                   |
| ZBED3-AS1    | 0.34043605                             | N                                            | 0                                      | N                                   |
| ZNF321P      | 0.34043605                             | N                                            | 0                                      | N                                   |
| BTLA         | 0.340589881                            | N                                            | 3                                      | N                                   |
| KIAA1456     | 0.340589881                            | N                                            | 0                                      | N                                   |
| RPUSD2       | 0.340589881                            | N                                            | 0                                      | N                                   |
| TMED10P1     | 0.340589881                            | N                                            | 0                                      | N                                   |
| ZNF254       | 0.340589881                            | N                                            | 0                                      | N                                   |
| C5orf30      | 0.340703705                            | N                                            | 0                                      | N                                   |
| DPY19L2P3    | 0.340703705                            | N                                            | 0                                      | N                                   |
| ATP5G1P4     | 0.340746967                            | N                                            | 0                                      | N                                   |
| LSM4         | 0.340746967                            | N                                            | 0                                      | N                                   |
| AC016251.2   | 0.340984036                            | N                                            | 0                                      | N                                   |
| FAM89A       | 0.34119635                             | N                                            | 0                                      | N                                   |

| Gene symbols | FDR (differential expression analysis) | Differentially expressed gene? Y, Yes; N, No | Number of insulin related publications | Insulin related gene? Y, Yes; N, No |
|--------------|----------------------------------------|----------------------------------------------|----------------------------------------|-------------------------------------|
| AC022182.3   | 0.341470266                            | N                                            | 0                                      | N                                   |
| AK3P3        | 0.34150521                             | N                                            | 0                                      | N                                   |
| ESCO2        | 0.34150521                             | N                                            | 0                                      | N                                   |
| LZTS3        | 0.34150521                             | N                                            | 0                                      | N                                   |
| MAN2A1       | 0.34150521                             | N                                            | 0                                      | N                                   |
| TBC1D22B     | 0.34150521                             | N                                            | 0                                      | N                                   |
| AC067968.1   | 0.341680243                            | N                                            | 0                                      | N                                   |
| CHCHD1       | 0.341680243                            | N                                            | 0                                      | N                                   |
| LRRC75A-AS1  | 0.341680243                            | N                                            | 0                                      | N                                   |
| NFYA         | 0.341680243                            | N                                            | 1                                      | N                                   |
| PSG5         | 0.341680243                            | N                                            | 3                                      | N                                   |
| TMEM9B       | 0.341680243                            | N                                            | 0                                      | N                                   |
| ZCCHC3       | 0.341680243                            | N                                            | 0                                      | N                                   |
| ZNF585A      | 0.341680243                            | N                                            | 0                                      | N                                   |
| SSH1         | 0.341804358                            | N                                            | 3                                      | N                                   |
| ENO4         | 0.342667695                            | N                                            | 0                                      | N                                   |
| ZW10         | 0.342667695                            | N                                            | 1                                      | N                                   |
| DDR2         | 0.342875388                            | N                                            | 15                                     | N                                   |
| SNRPCP19     | 0.342875388                            | N                                            | 0                                      | N                                   |
| SPOCK3       | 0.342875388                            | N                                            | 0                                      | N                                   |
| NF1          | 0.343133138                            | N                                            | 42                                     | N                                   |
| CCP110       | 0.343212758                            | N                                            | 0                                      | N                                   |
| TMEM229B     | 0.343212758                            | N                                            | 1                                      | N                                   |
| AC091057.3   | 0.343302938                            | N                                            | 0                                      | N                                   |
| EXOSC3       | 0.343302938                            | N                                            | 0                                      | N                                   |
| IL15         | 0.343302938                            | N                                            | 83                                     | N                                   |
| TET2         | 0.343302938                            | N                                            | 11                                     | N                                   |
| VPS13C       | 0.343302938                            | N                                            | 9                                      | N                                   |
| WDR82        | 0.343302938                            | N                                            | 1                                      | N                                   |
| CDCA5        | 0.343338692                            | N                                            | 2                                      | N                                   |
| EGFL8        | 0.343338692                            | N                                            | 0                                      | N                                   |
| AC013644.1   | 0.343708879                            | N                                            | 0                                      | N                                   |
| AC018638.6   | 0.343708879                            | N                                            | 0                                      | N                                   |
| CUL4B        | 0.343708879                            | N                                            | 3                                      | N                                   |
| PLGLB1       | 0.343708879                            | N                                            | 0                                      | N                                   |
| AC012676.3   | 0.343782274                            | N                                            | 0                                      | N                                   |
| NCOA3        | 0.343782274                            | N                                            | 22                                     | N                                   |
| BARD1        | 0.343942571                            | N                                            | 2                                      | N                                   |
| USP8         | 0.343942571                            | N                                            | 5                                      | N                                   |
| AL080276.1   | 0.344126473                            | N                                            | 0                                      | N                                   |
| TYMSOS       | 0.344126473                            | N                                            | 0                                      | N                                   |
| KCNN2        | 0.344128453                            | N                                            | 4                                      | N                                   |
| RPS4XP2      | 0.344128453                            | N                                            | 0                                      | N                                   |
| MAT2A        | 0.344383995                            | N                                            | 4                                      | N                                   |
| AC068831.3   | 0.344429363                            | N                                            | 0                                      | N                                   |
| AC092474.2   | 0.344429363                            | N                                            | 0                                      | N                                   |
| DPP4         | 0.344429363                            | N                                            | 488                                    | Y                                   |
| GNL1         | 0.344429363                            | N                                            | 0                                      | N                                   |
| HIST1H2BO    | 0.344429363                            | N                                            | 1                                      | N                                   |
| KIAA1549     | 0.344429363                            | N                                            | 0                                      | N                                   |
| LSG1         | 0.344429363                            | N                                            | 0                                      | N                                   |
| MALAT1       | 0.344429363                            | N                                            | 19                                     | N                                   |
| NRBF2        | 0.344429363                            | N                                            | 0                                      | N                                   |
| PGP          | 0.344429363                            | N                                            | 30                                     | N                                   |
| RAI14        | 0.344429363                            | N                                            | 0                                      | N                                   |
| SMS          | 0.344429363                            | N                                            | 336                                    | Y                                   |
| STIL         | 0.344429363                            | N                                            | 2                                      | N                                   |
| SUV39H1      | 0.344429363                            | N                                            | 5                                      | N                                   |
| CCDC149      | 0.344481131                            | N                                            | 0                                      | N                                   |
| LRRC7        | 0.344481131                            | N                                            | 0                                      | N                                   |
| LSM3P2       | 0.344481131                            | N                                            | 0                                      | N                                   |
| AP003972.1   | 0.344620828                            | N                                            | 0                                      | N                                   |
| BTBD19       | 0.344620828                            | N                                            | 0                                      | N                                   |
| ERP44        | 0.344620828                            | N                                            | 16                                     | N                                   |
| FGFR1OP      | 0.344620828                            | N                                            | 2                                      | N                                   |
| HIST1H2BJ    | 0.344620828                            | N                                            | 2                                      | N                                   |



| Gene symbols | FDR (differential expression analysis) | Differentially expressed gene? Y, Yes; N, No | Number of insulin related publications | Insulin related gene? Y, Yes; N, No |
|--------------|----------------------------------------|----------------------------------------------|----------------------------------------|-------------------------------------|
| LRIG1        | 0.344620828                            | N                                            | 2                                      | N                                   |
| ST18         | 0.344620828                            | N                                            | 4                                      | N                                   |
| ZNF766       | 0.344620828                            | N                                            | 0                                      | N                                   |
| AL033543.1   | 0.344920536                            | N                                            | 0                                      | N                                   |
| CNN2P9       | 0.344920536                            | N                                            | 0                                      | N                                   |
| EXOC2        | 0.344920536                            | N                                            | 2                                      | N                                   |
| FAM174A      | 0.344920536                            | N                                            | 1                                      | N                                   |
| GALC         | 0.344920536                            | N                                            | 11                                     | N                                   |
| TMEM239      | 0.344920536                            | N                                            | 0                                      | N                                   |
| AC109446.4   | 0.344965827                            | N                                            | 0                                      | N                                   |
| AFP          | 0.344965827                            | N                                            | 254                                    | Y                                   |
| HDLBP        | 0.344965827                            | N                                            | 1                                      | N                                   |
| PCNX2        | 0.344965827                            | N                                            | 0                                      | N                                   |
| SARAF        | 0.344965827                            | N                                            | 13                                     | N                                   |
| TMEM56-RWDD3 | 0.344965827                            | N                                            | 0                                      | N                                   |
| UBN2         | 0.344965827                            | N                                            | 0                                      | N                                   |
| AC015936.1   | 0.345452852                            | N                                            | 0                                      | N                                   |
| GPKOW        | 0.345581993                            | N                                            | 0                                      | N                                   |
| SCYL2        | 0.345663221                            | N                                            | 0                                      | N                                   |
| BTG3-AS1     | 0.34600284                             | N                                            | 0                                      | N                                   |
| CCDC134      | 0.34600284                             | N                                            | 0                                      | N                                   |
| CEP72        | 0.34600284                             | N                                            | 0                                      | N                                   |
| CHIC2        | 0.34600284                             | N                                            | 0                                      | N                                   |
| MRPS18BP2    | 0.34600284                             | N                                            | 0                                      | N                                   |
| RN7SL220P    | 0.34600284                             | N                                            | 0                                      | N                                   |
| RPL23AP82    | 0.34600284                             | N                                            | 0                                      | N                                   |
| TAOK1        | 0.34600284                             | N                                            | 0                                      | N                                   |
| XX-2136C48.7 | 0.34600284                             | N                                            | 0                                      | N                                   |
| STOM         | 0.346192409                            | N                                            | 1                                      | N                                   |
| RC3H1        | 0.346505204                            | N                                            | 0                                      | N                                   |
| DCUN1D4      | 0.346526236                            | N                                            | 0                                      | N                                   |
| NEDD9        | 0.34687637                             | N                                            | 3                                      | N                                   |
| AC010531.6   | 0.347193589                            | N                                            | 0                                      | N                                   |
| TMEM14EP     | 0.347193589                            | N                                            | 0                                      | N                                   |
| AC004925.1   | 0.347258487                            | N                                            | 0                                      | N                                   |
| AC007731.5   | 0.347258487                            | N                                            | 0                                      | N                                   |
| AMMECR1      | 0.347258487                            | N                                            | 0                                      | N                                   |
| C6orf47      | 0.347258487                            | N                                            | 0                                      | N                                   |
| CADPS        | 0.347258487                            | N                                            | 2                                      | N                                   |
| COA3         | 0.347258487                            | N                                            | 0                                      | N                                   |
| CYP51A1P3    | 0.347258487                            | N                                            | 0                                      | N                                   |
| HIST1H4C     | 0.347258487                            | N                                            | 0                                      | N                                   |
| IL10RB       | 0.347258487                            | N                                            | 1                                      | N                                   |
| PIK3CD       | 0.347258487                            | N                                            | 12                                     | N                                   |
| AC087289.2   | 0.347310264                            | N                                            | 0                                      | N                                   |
| BTBD7P1      | 0.347310264                            | N                                            | 0                                      | N                                   |
| CYTH2        | 0.347310264                            | N                                            | 1                                      | N                                   |
| KATNA1       | 0.347310264                            | N                                            | 0                                      | N                                   |
| KIF5C        | 0.347310264                            | N                                            | 0                                      | N                                   |
| TMEM86B      | 0.347310264                            | N                                            | 0                                      | N                                   |
| RCC1         | 0.347557754                            | N                                            | 1                                      | N                                   |
| FAM214A      | 0.347559773                            | N                                            | 0                                      | N                                   |
| STOML2       | 0.347559773                            | N                                            | 2                                      | N                                   |
| Z68871.1     | 0.347559773                            | N                                            | 0                                      | N                                   |
| HASPIN       | 0.347698833                            | N                                            | 0                                      | N                                   |
| SLC7A7       | 0.347698833                            | N                                            | 2                                      | N                                   |
| AP000654.1   | 0.347866182                            | N                                            | 0                                      | N                                   |
| HNRNPR       | 0.347931796                            | N                                            | 0                                      | N                                   |
| LINC00937    | 0.347931796                            | N                                            | 0                                      | N                                   |
| MRPL46       | 0.347931796                            | N                                            | 0                                      | N                                   |
| SDCCAG8      | 0.347931796                            | N                                            | 1                                      | N                                   |
| ZFP14        | 0.347931796                            | N                                            | 0                                      | N                                   |
| AL357033.1   | 0.348255166                            | N                                            | 0                                      | N                                   |
| C16orf91     | 0.348255166                            | N                                            | 0                                      | N                                   |
| FAM149A      | 0.348340794                            | N                                            | 0                                      | N                                   |
| LRRCC1       | 0.348438659                            | N                                            | 0                                      | N                                   |

| Gene symbols | FDR (differential expression analysis) | Differentially expressed gene? Y, Yes; N, No | Number of insulin related publications | Insulin related gene? Y, Yes; N, No |
|--------------|----------------------------------------|----------------------------------------------|----------------------------------------|-------------------------------------|
| AC110048.2   | 0.348444555                            | N                                            | 0                                      | N                                   |
| CALD1        | 0.348525772                            | N                                            | 1                                      | N                                   |
| IQCC         | 0.348594118                            | N                                            | 1                                      | N                                   |
| APBA2        | 0.348727117                            | N                                            | 1                                      | N                                   |
| COX20        | 0.349238058                            | N                                            | 0                                      | N                                   |
| NTN3         | 0.349238058                            | N                                            | 0                                      | N                                   |
| AC048382.2   | 0.349365214                            | N                                            | 0                                      | N                                   |
| ARL1         | 0.349451605                            | N                                            | 1                                      | N                                   |
| CPEB2        | 0.349451605                            | N                                            | 1                                      | N                                   |
| TTC4         | 0.349451605                            | N                                            | 0                                      | N                                   |
| AC016582.3   | 0.349598355                            | N                                            | 0                                      | N                                   |
| SELENOP      | 0.349598355                            | N                                            | 8                                      | N                                   |
| CCL16        | 0.349774392                            | N                                            | 0                                      | N                                   |
| IL6          | 0.349774392                            | N                                            | 787                                    | Y                                   |
| RFWD3        | 0.349774392                            | N                                            | 0                                      | N                                   |
| ZYG11A       | 0.349774392                            | N                                            | 1                                      | N                                   |
| AC105749.1   | 0.34984871                             | N                                            | 0                                      | N                                   |
| TRAF6P1      | 0.34984871                             | N                                            | 0                                      | N                                   |
| AC073310.1   | 0.349874665                            | N                                            | 0                                      | N                                   |
| AC117947.1   | 0.349874665                            | N                                            | 0                                      | N                                   |
| EPB41L4A-AS2 | 0.349874665                            | N                                            | 0                                      | N                                   |
| SMILR        | 0.349874665                            | N                                            | 0                                      | N                                   |
| BRDT         | 0.350419263                            | N                                            | 1                                      | N                                   |
| MTRF2        | 0.35068975                             | N                                            | 0                                      | N                                   |
| MED20        | 0.350783613                            | N                                            | 0                                      | N                                   |
| PCDHGB8P     | 0.350783613                            | N                                            | 0                                      | N                                   |
| RABGAP1      | 0.350783613                            | N                                            | 2                                      | N                                   |
| TPT1         | 0.350783613                            | N                                            | 2                                      | N                                   |
| AC010226.1   | 0.350915519                            | N                                            | 0                                      | N                                   |
| GPR85        | 0.350915519                            | N                                            | 1                                      | N                                   |
| KIF9-AS1     | 0.351254751                            | N                                            | 0                                      | N                                   |
| KNOP1P4      | 0.351254751                            | N                                            | 0                                      | N                                   |
| PRUNE1       | 0.35127989                             | N                                            | 0                                      | N                                   |
| F2RL3        | 0.3513636                              | N                                            | 0                                      | N                                   |
| NKAIN2       | 0.351382697                            | N                                            | 0                                      | N                                   |
| AC012073.1   | 0.35158782                             | N                                            | 0                                      | N                                   |
| ENOSF1       | 0.35158782                             | N                                            | 0                                      | N                                   |
| LINC00892    | 0.35158782                             | N                                            | 0                                      | N                                   |
| MYLK2        | 0.35158782                             | N                                            | 1                                      | N                                   |
| TMCC1        | 0.35158782                             | N                                            | 0                                      | N                                   |
| FRG1BP       | 0.35159562                             | N                                            | 0                                      | N                                   |
| DUSP11       | 0.352080335                            | N                                            | 0                                      | N                                   |
| AC026700.1   | 0.352660508                            | N                                            | 0                                      | N                                   |
| AC120049.1   | 0.352660508                            | N                                            | 0                                      | N                                   |
| SOAT1        | 0.352660508                            | N                                            | 2                                      | N                                   |
| AC013468.1   | 0.352977186                            | N                                            | 0                                      | N                                   |
| AC104109.4   | 0.352977186                            | N                                            | 0                                      | N                                   |
| AL662795.2   | 0.352977186                            | N                                            | 0                                      | N                                   |
| AP000446.1   | 0.352977186                            | N                                            | 0                                      | N                                   |
| AC099343.3   | 0.353123574                            | N                                            | 0                                      | N                                   |
| AL022311.1   | 0.353465983                            | N                                            | 0                                      | N                                   |
| AL035448.1   | 0.353465983                            | N                                            | 0                                      | N                                   |
| SLC4A7       | 0.353465983                            | N                                            | 0                                      | N                                   |
| GRID2        | 0.353673996                            | N                                            | 0                                      | N                                   |
| ALKBH8       | 0.353802361                            | N                                            | 0                                      | N                                   |
| ENPP2        | 0.353802361                            | N                                            | 9                                      | N                                   |
| MCM4         | 0.353802361                            | N                                            | 1                                      | N                                   |
| NPTX1        | 0.353802361                            | N                                            | 1                                      | N                                   |
| SND1-IT1     | 0.353802361                            | N                                            | 0                                      | N                                   |
| MCUB         | 0.35382453                             | N                                            | 0                                      | N                                   |
| REXO4        | 0.35401455                             | N                                            | 0                                      | N                                   |
| UBB          | 0.35401455                             | N                                            | 3                                      | N                                   |
| XRCC6        | 0.35401455                             | N                                            | 16                                     | N                                   |
| AC016999.2   | 0.354192539                            | N                                            | 0                                      | N                                   |
| UBE2R2       | 0.354192539                            | N                                            | 0                                      | N                                   |
| AC000123.2   | 0.354398458                            | N                                            | 0                                      | N                                   |

| Gene symbols | FDR (differential expression analysis) | Differentially expressed gene? Y, Yes; N, No | Number of insulin related publications | Insulin related gene? Y, Yes; N, No |
|--------------|----------------------------------------|----------------------------------------------|----------------------------------------|-------------------------------------|
| AC061965.1   | 0.354398458                            | N                                            | 0                                      | N                                   |
| ASS1         | 0.354398458                            | N                                            | 3                                      | N                                   |
| C7orf69      | 0.354398458                            | N                                            | 0                                      | N                                   |
| CKLF         | 0.354398458                            | N                                            | 1                                      | N                                   |
| NPEPPS       | 0.354398458                            | N                                            | 0                                      | N                                   |
| RHOQ         | 0.354398458                            | N                                            | 36                                     | N                                   |
| RHOXF1-AS1   | 0.354398458                            | N                                            | 0                                      | N                                   |
| TMEM223      | 0.354436817                            | N                                            | 0                                      | N                                   |
| AC123768.4   | 0.354464808                            | N                                            | 0                                      | N                                   |
| AC097634.1   | 0.354864368                            | N                                            | 0                                      | N                                   |
| AC131009.3   | 0.354864368                            | N                                            | 0                                      | N                                   |
| COQ2         | 0.354864368                            | N                                            | 3                                      | N                                   |
| ZFP28        | 0.354864368                            | N                                            | 0                                      | N                                   |
| AC084757.3   | 0.354953619                            | N                                            | 0                                      | N                                   |
| AC003973.3   | 0.355141721                            | N                                            | 0                                      | N                                   |
| AL683813.1   | 0.355141721                            | N                                            | 0                                      | N                                   |
| DNAAF4-CCPG1 | 0.355141721                            | N                                            | 0                                      | N                                   |
| ITM2B        | 0.355141721                            | N                                            | 5                                      | N                                   |
| LSM10        | 0.355297967                            | N                                            | 0                                      | N                                   |
| AC100771.1   | 0.355341555                            | N                                            | 0                                      | N                                   |
| AC113189.4   | 0.355341555                            | N                                            | 0                                      | N                                   |
| ACTR5        | 0.355341555                            | N                                            | 0                                      | N                                   |
| COG4         | 0.355341555                            | N                                            | 0                                      | N                                   |
| DOCK7        | 0.355341555                            | N                                            | 5                                      | N                                   |
| FAM181B      | 0.355341555                            | N                                            | 0                                      | N                                   |
| FAM78A       | 0.355341555                            | N                                            | 0                                      | N                                   |
| HIST1H4L     | 0.355341555                            | N                                            | 1                                      | N                                   |
| KRT9         | 0.355341555                            | N                                            | 0                                      | N                                   |
| PCDH10       | 0.355341555                            | N                                            | 1                                      | N                                   |
| PCDHGB1      | 0.355341555                            | N                                            | 0                                      | N                                   |
| SLC25A34     | 0.355341555                            | N                                            | 0                                      | N                                   |
| KEAP1        | 0.355576468                            | N                                            | 61                                     | N                                   |
| FAM86DP      | 0.35568831                             | N                                            | 0                                      | N                                   |
| TEP1         | 0.35568831                             | N                                            | 9                                      | N                                   |
| UMPS         | 0.35568831                             | N                                            | 0                                      | N                                   |
| AC004943.2   | 0.355987195                            | N                                            | 0                                      | N                                   |
| AL137141.1   | 0.355987195                            | N                                            | 0                                      | N                                   |
| APIG1        | 0.355987195                            | N                                            | 0                                      | N                                   |
| HIST2H2AB    | 0.355987195                            | N                                            | 0                                      | N                                   |
| OBSCN-AS1    | 0.355987195                            | N                                            | 0                                      | N                                   |
| POLR2KP1     | 0.355987195                            | N                                            | 0                                      | N                                   |
| XRCC1        | 0.355987195                            | N                                            | 4                                      | N                                   |
| AC097103.2   | 0.356140618                            | N                                            | 0                                      | N                                   |
| NPY          | 0.356140618                            | N                                            | 912                                    | Y                                   |
| AC087854.1   | 0.356251105                            | N                                            | 0                                      | N                                   |
| ANO1         | 0.356251105                            | N                                            | 8                                      | N                                   |
| PRSS35       | 0.356251105                            | N                                            | 0                                      | N                                   |
| UBE2F-SCLY   | 0.356251105                            | N                                            | 1                                      | N                                   |
| EEF1A1P24    | 0.35649732                             | N                                            | 0                                      | N                                   |
| ARHGEF40     | 0.356555508                            | N                                            | 0                                      | N                                   |
| LINC00294    | 0.356555508                            | N                                            | 0                                      | N                                   |
| PALM2        | 0.356555508                            | N                                            | 0                                      | N                                   |
| PLEKHA6      | 0.35661541                             | N                                            | 0                                      | N                                   |
| RN7SKP245    | 0.35661541                             | N                                            | 0                                      | N                                   |
| WDR78        | 0.35661541                             | N                                            | 0                                      | N                                   |
| ARHGEF38     | 0.356685658                            | N                                            | 0                                      | N                                   |
| MCC          | 0.356685658                            | N                                            | 63                                     | N                                   |
| RNF185       | 0.356685658                            | N                                            | 0                                      | N                                   |
| SCDP1        | 0.356685658                            | N                                            | 0                                      | N                                   |
| STEAP4       | 0.356685658                            | N                                            | 26                                     | N                                   |
| TTYH2        | 0.356685658                            | N                                            | 0                                      | N                                   |
| ZFP37        | 0.356685658                            | N                                            | 0                                      | N                                   |
| AC105339.3   | 0.356793162                            | N                                            | 0                                      | N                                   |
| ACVR2A       | 0.356793162                            | N                                            | 1                                      | N                                   |
| ADGRF3       | 0.356793162                            | N                                            | 0                                      | N                                   |
| ATXN10       | 0.356793162                            | N                                            | 0                                      | N                                   |

| Gene symbols | FDR (differential expression analysis) | Differentially expressed gene? Y, Yes; N, No | Number of insulin related publications | Insulin related gene? Y, Yes; N, No |
|--------------|----------------------------------------|----------------------------------------------|----------------------------------------|-------------------------------------|
| FOXO4        | 0.356793162                            | N                                            | 71                                     | N                                   |
| KCTD19       | 0.356793162                            | N                                            | 0                                      | N                                   |
| SNRNP25      | 0.356793162                            | N                                            | 1                                      | N                                   |
| ZNF420       | 0.356793162                            | N                                            | 0                                      | N                                   |
| MND1         | 0.356794889                            | N                                            | 0                                      | N                                   |
| CACNA1I      | 0.357271331                            | N                                            | 1                                      | N                                   |
| AL161891.1   | 0.357479271                            | N                                            | 0                                      | N                                   |
| MRPL16       | 0.357479271                            | N                                            | 0                                      | N                                   |
| AC005154.1   | 0.357765385                            | N                                            | 0                                      | N                                   |
| CACNA1E      | 0.357765385                            | N                                            | 15                                     | N                                   |
| HSP90B2P     | 0.357765385                            | N                                            | 0                                      | N                                   |
| RNF11        | 0.35795747                             | N                                            | 0                                      | N                                   |
| ULK4P2       | 0.358109905                            | N                                            | 0                                      | N                                   |
| HIST1H2BC    | 0.358177093                            | N                                            | 0                                      | N                                   |
| NUFIP2       | 0.358219087                            | N                                            | 0                                      | N                                   |
| AC024060.1   | 0.35827124                             | N                                            | 0                                      | N                                   |
| NUP35P1      | 0.35827124                             | N                                            | 0                                      | N                                   |
| ZNF804A      | 0.35827124                             | N                                            | 0                                      | N                                   |
| ARL14EP      | 0.358306517                            | N                                            | 0                                      | N                                   |
| ADGRG1       | 0.358348781                            | N                                            | 3                                      | N                                   |
| AL078459.1   | 0.358348781                            | N                                            | 0                                      | N                                   |
| AL590867.1   | 0.358399055                            | N                                            | 0                                      | N                                   |
| CCDC15       | 0.358399055                            | N                                            | 0                                      | N                                   |
| EEF1D        | 0.358399055                            | N                                            | 1                                      | N                                   |
| NBPF13P      | 0.358399055                            | N                                            | 0                                      | N                                   |
| SFXN2        | 0.358399055                            | N                                            | 1                                      | N                                   |
| UBR5         | 0.358399055                            | N                                            | 1                                      | N                                   |
| NFE2L1       | 0.358883397                            | N                                            | 7                                      | N                                   |
| SMARCE1P5    | 0.358917008                            | N                                            | 0                                      | N                                   |
| UVRAG        | 0.358917008                            | N                                            | 5                                      | N                                   |
| KIAA0513     | 0.359312347                            | N                                            | 0                                      | N                                   |
| CFLAR        | 0.35945893                             | N                                            | 13                                     | N                                   |
| GABPB1-AS1   | 0.35945893                             | N                                            | 0                                      | N                                   |
| AC084033.3   | 0.359792705                            | N                                            | 0                                      | N                                   |
| PATL2        | 0.359792705                            | N                                            | 0                                      | N                                   |
| RPEL1        | 0.359792705                            | N                                            | 0                                      | N                                   |
| CRIP1        | 0.359917091                            | N                                            | 1                                      | N                                   |
| OPN3         | 0.359917091                            | N                                            | 0                                      | N                                   |
| CEP128       | 0.360042362                            | N                                            | 0                                      | N                                   |
| FAM69A       | 0.360572691                            | N                                            | 0                                      | N                                   |
| TSPYL5       | 0.360895206                            | N                                            | 0                                      | N                                   |
| PIK3IP1      | 0.360920342                            | N                                            | 3                                      | N                                   |
| AC027335.1   | 0.361326828                            | N                                            | 0                                      | N                                   |
| AC079328.2   | 0.361326828                            | N                                            | 0                                      | N                                   |
| AC093726.2   | 0.361326828                            | N                                            | 0                                      | N                                   |
| AC139365.1   | 0.361326828                            | N                                            | 0                                      | N                                   |
| AL078621.1   | 0.361326828                            | N                                            | 0                                      | N                                   |
| AL137003.1   | 0.361326828                            | N                                            | 0                                      | N                                   |
| AL713866.1   | 0.361326828                            | N                                            | 0                                      | N                                   |
| AP000275.2   | 0.361326828                            | N                                            | 0                                      | N                                   |
| AP001486.2   | 0.361326828                            | N                                            | 0                                      | N                                   |
| ARID5B       | 0.361326828                            | N                                            | 1                                      | N                                   |
| ARRDC3       | 0.361326828                            | N                                            | 0                                      | N                                   |
| ART4         | 0.361326828                            | N                                            | 0                                      | N                                   |
| CCT5P2       | 0.361326828                            | N                                            | 0                                      | N                                   |
| CD14         | 0.361326828                            | N                                            | 380                                    | Y                                   |
| DARS-AS1     | 0.361326828                            | N                                            | 0                                      | N                                   |
| DRAM1        | 0.361326828                            | N                                            | 3                                      | N                                   |
| EIF2S2P5     | 0.361326828                            | N                                            | 0                                      | N                                   |
| ENC1         | 0.361326828                            | N                                            | 2                                      | N                                   |
| ENO1-IT1     | 0.361326828                            | N                                            | 0                                      | N                                   |
| FAM120A      | 0.361326828                            | N                                            | 1                                      | N                                   |
| FAM184A      | 0.361326828                            | N                                            | 0                                      | N                                   |
| FAM72B       | 0.361326828                            | N                                            | 0                                      | N                                   |
| HNRNPAB      | 0.361326828                            | N                                            | 1                                      | N                                   |
| LINC00924    | 0.361326828                            | N                                            | 0                                      | N                                   |

| Gene symbols | FDR (differential expression analysis) | Differentially expressed gene? Y, Yes; N, No | Number of insulin related publications | Insulin related gene? Y, Yes; N, No |
|--------------|----------------------------------------|----------------------------------------------|----------------------------------------|-------------------------------------|
| MRPS16P2     | 0.361326828                            | N                                            | 0                                      | N                                   |
| PCDHB11      | 0.361326828                            | N                                            | 0                                      | N                                   |
| PCDHGA7      | 0.361326828                            | N                                            | 0                                      | N                                   |
| PDE8B        | 0.361326828                            | N                                            | 9                                      | N                                   |
| PTOV1-AS2    | 0.361326828                            | N                                            | 0                                      | N                                   |
| RAB14        | 0.361326828                            | N                                            | 15                                     | N                                   |
| SLC16A14     | 0.361326828                            | N                                            | 0                                      | N                                   |
| SLC30A7      | 0.361326828                            | N                                            | 3                                      | N                                   |
| UBE3B        | 0.361326828                            | N                                            | 0                                      | N                                   |
| WDR74        | 0.361326828                            | N                                            | 0                                      | N                                   |
| ZBTB25       | 0.361326828                            | N                                            | 0                                      | N                                   |
| ZNF720       | 0.361326828                            | N                                            | 0                                      | N                                   |
| REEP4        | 0.361512641                            | N                                            | 0                                      | N                                   |
| TMEM230      | 0.361512641                            | N                                            | 0                                      | N                                   |
| TOE1         | 0.361512641                            | N                                            | 0                                      | N                                   |
| AL391822.1   | 0.3616392                              | N                                            | 0                                      | N                                   |
| AL031595.2   | 0.361963272                            | N                                            | 0                                      | N                                   |
| AL359643.3   | 0.361963272                            | N                                            | 0                                      | N                                   |
| CEACAM19     | 0.361963272                            | N                                            | 0                                      | N                                   |
| IRGQ         | 0.361963272                            | N                                            | 0                                      | N                                   |
| KCNF1        | 0.361963272                            | N                                            | 0                                      | N                                   |
| LSM6         | 0.361963272                            | N                                            | 0                                      | N                                   |
| MR1          | 0.361963272                            | N                                            | 5                                      | N                                   |
| MTHFD2P6     | 0.361963272                            | N                                            | 0                                      | N                                   |
| PEX5         | 0.361963272                            | N                                            | 4                                      | N                                   |
| RP11-944L7.5 | 0.361963272                            | N                                            | 0                                      | N                                   |
| STIP1        | 0.361963272                            | N                                            | 1                                      | N                                   |
| TMEM150A     | 0.361963272                            | N                                            | 0                                      | N                                   |
| TMEM80       | 0.361963272                            | N                                            | 0                                      | N                                   |
| TP53INP1     | 0.361963272                            | N                                            | 7                                      | N                                   |
| ZNF432       | 0.361963272                            | N                                            | 0                                      | N                                   |
| AC008498.1   | 0.362193144                            | N                                            | 0                                      | N                                   |
| AL021546.1   | 0.362193144                            | N                                            | 0                                      | N                                   |
| CPSF4        | 0.362251354                            | N                                            | 0                                      | N                                   |
| FANCL        | 0.362251354                            | N                                            | 5                                      | N                                   |
| FAM45A       | 0.362339826                            | N                                            | 0                                      | N                                   |
| YWHABP1      | 0.362339826                            | N                                            | 0                                      | N                                   |
| KIAA0825     | 0.362411662                            | N                                            | 0                                      | N                                   |
| AC005102.1   | 0.362454417                            | N                                            | 0                                      | N                                   |
| AL357515.1   | 0.362454417                            | N                                            | 0                                      | N                                   |
| IPO5P1       | 0.362454417                            | N                                            | 0                                      | N                                   |
| FSD1         | 0.362623025                            | N                                            | 0                                      | N                                   |
| MN1          | 0.362692201                            | N                                            | 2                                      | N                                   |
| CLCN3        | 0.362754316                            | N                                            | 2                                      | N                                   |
| HIST1H2BB    | 0.362754316                            | N                                            | 0                                      | N                                   |
| LEPROT       | 0.362754316                            | N                                            | 7                                      | N                                   |
| ZNF181       | 0.362759549                            | N                                            | 0                                      | N                                   |
| C1GALT1P1    | 0.363075678                            | N                                            | 0                                      | N                                   |
| EXOSC1       | 0.363075678                            | N                                            | 0                                      | N                                   |
| SC5D         | 0.363240525                            | N                                            | 0                                      | N                                   |
| ACAD11       | 0.363260682                            | N                                            | 0                                      | N                                   |
| FAM45BP      | 0.363260682                            | N                                            | 0                                      | N                                   |
| MIR4697HG    | 0.363260682                            | N                                            | 0                                      | N                                   |
| IMPA1        | 0.364032751                            | N                                            | 2                                      | N                                   |
| AP006621.5   | 0.364167616                            | N                                            | 0                                      | N                                   |
| ZNF350-AS1   | 0.364167616                            | N                                            | 0                                      | N                                   |
| STRBP        | 0.364837418                            | N                                            | 0                                      | N                                   |
| DONSON       | 0.364868295                            | N                                            | 1                                      | N                                   |
| WASH2P       | 0.365338519                            | N                                            | 0                                      | N                                   |
| AC012464.2   | 0.36559744                             | N                                            | 0                                      | N                                   |
| CSNK1A1L     | 0.36574732                             | N                                            | 0                                      | N                                   |
| CSF3         | 0.366055566                            | N                                            | 4                                      | N                                   |
| AC023905.1   | 0.366099462                            | N                                            | 0                                      | N                                   |
| FAM168A      | 0.366099462                            | N                                            | 0                                      | N                                   |
| FAM220A      | 0.366132954                            | N                                            | 0                                      | N                                   |
| AC002480.4   | 0.366488247                            | N                                            | 0                                      | N                                   |

| Gene symbols | FDR (differential expression analysis) | Differentially expressed gene? Y, Yes; N, No | Number of insulin related publications | Insulin related gene? Y, Yes; N, No |
|--------------|----------------------------------------|----------------------------------------------|----------------------------------------|-------------------------------------|
| AC004846.1   | 0.366488247                            | N                                            | 0                                      | N                                   |
| AC006946.2   | 0.366488247                            | N                                            | 0                                      | N                                   |
| AC009055.2   | 0.366488247                            | N                                            | 0                                      | N                                   |
| AC073910.1   | 0.366488247                            | N                                            | 0                                      | N                                   |
| AC097534.2   | 0.366488247                            | N                                            | 0                                      | N                                   |
| ADAT1        | 0.366488247                            | N                                            | 0                                      | N                                   |
| AL365356.5   | 0.366488247                            | N                                            | 0                                      | N                                   |
| AP1M1        | 0.366488247                            | N                                            | 1                                      | N                                   |
| ATXN3        | 0.366488247                            | N                                            | 4                                      | N                                   |
| CAMK2D       | 0.366488247                            | N                                            | 8                                      | N                                   |
| CU638689.4   | 0.366488247                            | N                                            | 0                                      | N                                   |
| DUT          | 0.366488247                            | N                                            | 1                                      | N                                   |
| EIF2AK3      | 0.366488247                            | N                                            | 60                                     | N                                   |
| FAM167A      | 0.366488247                            | N                                            | 0                                      | N                                   |
| FOXN3P1      | 0.366488247                            | N                                            | 0                                      | N                                   |
| HPS1         | 0.366488247                            | N                                            | 1                                      | N                                   |
| HSPA8P3      | 0.366488247                            | N                                            | 0                                      | N                                   |
| KCTD5        | 0.366488247                            | N                                            | 0                                      | N                                   |
| KLHL7        | 0.366488247                            | N                                            | 1                                      | N                                   |
| LRIG2        | 0.366488247                            | N                                            | 0                                      | N                                   |
| MROH6        | 0.366488247                            | N                                            | 0                                      | N                                   |
| NANS         | 0.366488247                            | N                                            | 2                                      | N                                   |
| OSER1-AS1    | 0.366488247                            | N                                            | 0                                      | N                                   |
| OXCT1        | 0.366488247                            | N                                            | 1                                      | N                                   |
| TAMM41       | 0.366488247                            | N                                            | 0                                      | N                                   |
| TFIP11       | 0.366488247                            | N                                            | 0                                      | N                                   |
| TNKS2        | 0.366488247                            | N                                            | 4                                      | N                                   |
| TLL13P       | 0.366488247                            | N                                            | 0                                      | N                                   |
| TWIST2       | 0.366488247                            | N                                            | 4                                      | N                                   |
| UBE2WP1      | 0.366488247                            | N                                            | 0                                      | N                                   |
| USP13        | 0.366488247                            | N                                            | 0                                      | N                                   |
| VIT          | 0.366488247                            | N                                            | 121                                    | Y                                   |
| WRAP73       | 0.366488247                            | N                                            | 0                                      | N                                   |
| YEATS2-AS1   | 0.366488247                            | N                                            | 0                                      | N                                   |
| ZNF229       | 0.366488247                            | N                                            | 0                                      | N                                   |
| ZSWIM7       | 0.366488247                            | N                                            | 0                                      | N                                   |
| CDK4         | 0.366735826                            | N                                            | 168                                    | Y                                   |
| AL121753.2   | 0.366798138                            | N                                            | 0                                      | N                                   |
| TBCK         | 0.366798138                            | N                                            | 0                                      | N                                   |
| KALRN        | 0.366799289                            | N                                            | 0                                      | N                                   |
| TRUB2        | 0.366799289                            | N                                            | 0                                      | N                                   |
| AC010542.4   | 0.366884804                            | N                                            | 0                                      | N                                   |
| ANKAR        | 0.366884804                            | N                                            | 0                                      | N                                   |
| TBC1D8B      | 0.367293902                            | N                                            | 0                                      | N                                   |
| F10          | 0.367316618                            | N                                            | 36                                     | N                                   |
| KDM4C        | 0.367316618                            | N                                            | 0                                      | N                                   |
| KIF18B       | 0.367316618                            | N                                            | 0                                      | N                                   |
| LRRC4        | 0.367316618                            | N                                            | 1                                      | N                                   |
| PPM1K        | 0.367316618                            | N                                            | 9                                      | N                                   |
| AMFR         | 0.367407531                            | N                                            | 6                                      | N                                   |
| MGAT5        | 0.367407531                            | N                                            | 2                                      | N                                   |
| Z93930.2     | 0.367407531                            | N                                            | 0                                      | N                                   |
| AKR1C3       | 0.36746201                             | N                                            | 18                                     | N                                   |
| AL136531.1   | 0.36746201                             | N                                            | 0                                      | N                                   |
| NKX3-2       | 0.36746201                             | N                                            | 1                                      | N                                   |
| BAG3         | 0.367632863                            | N                                            | 3                                      | N                                   |
| NCMAP        | 0.367723268                            | N                                            | 0                                      | N                                   |
| UNK          | 0.367723268                            | N                                            | 10                                     | N                                   |
| TMOD1        | 0.367759621                            | N                                            | 1                                      | N                                   |
| ABAT         | 0.367931525                            | N                                            | 2                                      | N                                   |
| AC244517.1   | 0.367931525                            | N                                            | 0                                      | N                                   |
| BRIP1        | 0.367931525                            | N                                            | 1                                      | N                                   |
| COX7CP1      | 0.367931525                            | N                                            | 0                                      | N                                   |
| CYP2D7       | 0.367931525                            | N                                            | 0                                      | N                                   |
| IQGAP1       | 0.367931525                            | N                                            | 15                                     | N                                   |
| LINC00857    | 0.367931525                            | N                                            | 0                                      | N                                   |

| Gene symbols | FDR (differential expression analysis) | Differentially expressed gene? Y, Yes; N, No | Number of insulin related publications | Insulin related gene? Y, Yes; N, No |
|--------------|----------------------------------------|----------------------------------------------|----------------------------------------|-------------------------------------|
| MALAT1       | 0.367931525                            | N                                            | 19                                     | N                                   |
| METTL13      | 0.367931525                            | N                                            | 1                                      | N                                   |
| PANX1        | 0.367931525                            | N                                            | 7                                      | N                                   |
| SLC9A8       | 0.367931525                            | N                                            | 0                                      | N                                   |
| TUBA1B       | 0.367931525                            | N                                            | 1                                      | N                                   |
| VMAC         | 0.367931525                            | N                                            | 0                                      | N                                   |
| ZBTB43       | 0.367931525                            | N                                            | 0                                      | N                                   |
| SBF2         | 0.367987847                            | N                                            | 0                                      | N                                   |
| MAP3K21      | 0.368307734                            | N                                            | 0                                      | N                                   |
| SRSF3        | 0.368307734                            | N                                            | 8                                      | N                                   |
| AL031729.1   | 0.368466805                            | N                                            | 0                                      | N                                   |
| C16orf59     | 0.368466805                            | N                                            | 0                                      | N                                   |
| COG5         | 0.368466805                            | N                                            | 0                                      | N                                   |
| IDS          | 0.368466805                            | N                                            | 72                                     | N                                   |
| NCSTN        | 0.368466805                            | N                                            | 2                                      | N                                   |
| SERINC5      | 0.368466805                            | N                                            | 0                                      | N                                   |
| TRPC4AP      | 0.368466805                            | N                                            | 2                                      | N                                   |
| ZSWIM6       | 0.368466805                            | N                                            | 0                                      | N                                   |
| WNT9B        | 0.368655771                            | N                                            | 2                                      | N                                   |
| ZNF776       | 0.368655771                            | N                                            | 0                                      | N                                   |
| MCM5         | 0.368902086                            | N                                            | 2                                      | N                                   |
| NAP1L3       | 0.368902086                            | N                                            | 0                                      | N                                   |
| GOLGB1       | 0.369150579                            | N                                            | 0                                      | N                                   |
| RN7SL832P    | 0.369150579                            | N                                            | 0                                      | N                                   |
| TMOD2        | 0.369153369                            | N                                            | 0                                      | N                                   |
| CNTNAP1      | 0.369248626                            | N                                            | 1                                      | N                                   |
| SUMF1        | 0.369248626                            | N                                            | 0                                      | N                                   |
| AL355916.3   | 0.369398143                            | N                                            | 0                                      | N                                   |
| EXT2         | 0.369412677                            | N                                            | 10                                     | N                                   |
| FST          | 0.369412677                            | N                                            | 82                                     | N                                   |
| RPP30        | 0.369412677                            | N                                            | 0                                      | N                                   |
| SUGCT        | 0.369412677                            | N                                            | 0                                      | N                                   |
| AC008115.3   | 0.36989409                             | N                                            | 0                                      | N                                   |
| LAMTOR3      | 0.36989409                             | N                                            | 1                                      | N                                   |
| RNF38        | 0.36989409                             | N                                            | 0                                      | N                                   |
| MDK          | 0.370615092                            | N                                            | 4                                      | N                                   |
| LINC01278    | 0.370885963                            | N                                            | 0                                      | N                                   |
| FAM83F       | 0.370918164                            | N                                            | 0                                      | N                                   |
| FUNDC1       | 0.370918164                            | N                                            | 2                                      | N                                   |
| LANCL2       | 0.370918164                            | N                                            | 13                                     | N                                   |
| MT1F         | 0.370918164                            | N                                            | 0                                      | N                                   |
| AC005005.3   | 0.371129582                            | N                                            | 0                                      | N                                   |
| AC017083.2   | 0.371129582                            | N                                            | 0                                      | N                                   |
| AP000350.2   | 0.371129582                            | N                                            | 0                                      | N                                   |
| CD40         | 0.371129582                            | N                                            | 197                                    | Y                                   |
| EZR          | 0.371129582                            | N                                            | 3                                      | N                                   |
| GTF2IRD2B    | 0.371129582                            | N                                            | 0                                      | N                                   |
| LINC00910    | 0.371129582                            | N                                            | 0                                      | N                                   |
| PIAS3        | 0.371129582                            | N                                            | 2                                      | N                                   |
| RAB7B        | 0.371129582                            | N                                            | 0                                      | N                                   |
| TMEM47       | 0.371129582                            | N                                            | 0                                      | N                                   |
| AC002350.1   | 0.371298511                            | N                                            | 0                                      | N                                   |
| AL138828.2   | 0.371298511                            | N                                            | 0                                      | N                                   |
| CENPU        | 0.371298511                            | N                                            | 0                                      | N                                   |
| CETN2        | 0.371298511                            | N                                            | 1                                      | N                                   |
| FBL          | 0.371298511                            | N                                            | 0                                      | N                                   |
| KDM5C        | 0.371298511                            | N                                            | 1                                      | N                                   |
| LETM2        | 0.371298511                            | N                                            | 0                                      | N                                   |
| STARD13      | 0.371298511                            | N                                            | 4                                      | N                                   |
| AC012615.1   | 0.371416218                            | N                                            | 0                                      | N                                   |
| AC067863.1   | 0.371416218                            | N                                            | 0                                      | N                                   |
| AC080013.5   | 0.371416218                            | N                                            | 0                                      | N                                   |
| LRCH3        | 0.371416218                            | N                                            | 0                                      | N                                   |
| SARM1        | 0.371416218                            | N                                            | 2                                      | N                                   |
| TAF7L        | 0.371416218                            | N                                            | 0                                      | N                                   |
| ECH1         | 0.371626051                            | N                                            | 4                                      | N                                   |

| Gene symbols  | FDR (differential expression analysis) | Differentially expressed gene? Y, Yes; N, No | Number of insulin related publications | Insulin related gene? Y, Yes; N, No |
|---------------|----------------------------------------|----------------------------------------------|----------------------------------------|-------------------------------------|
| CTAGE1        | 0.371735686                            | N                                            | 0                                      | N                                   |
| AC092919.2    | 0.371979924                            | N                                            | 0                                      | N                                   |
| ELMO2         | 0.371979924                            | N                                            | 1                                      | N                                   |
| GEMIN2        | 0.371979924                            | N                                            | 1                                      | N                                   |
| TRAM1         | 0.37250957                             | N                                            | 2                                      | N                                   |
| PGM1          | 0.372513616                            | N                                            | 14                                     | N                                   |
| FAM173B       | 0.372631867                            | N                                            | 0                                      | N                                   |
| LINC01951     | 0.372631867                            | N                                            | 0                                      | N                                   |
| S100A11       | 0.372631867                            | N                                            | 2                                      | N                                   |
| AC121761.1    | 0.372731793                            | N                                            | 0                                      | N                                   |
| NKX1-1        | 0.372731793                            | N                                            | 0                                      | N                                   |
| NOVA1         | 0.372731793                            | N                                            | 3                                      | N                                   |
| POLE3         | 0.372731793                            | N                                            | 0                                      | N                                   |
| R3HCC1        | 0.372731793                            | N                                            | 0                                      | N                                   |
| ZNF737        | 0.372731793                            | N                                            | 0                                      | N                                   |
| RASL10A       | 0.372750485                            | N                                            | 0                                      | N                                   |
| WIP1          | 0.372825346                            | N                                            | 2                                      | N                                   |
| CDRT1         | 0.373702269                            | N                                            | 0                                      | N                                   |
| METT125       | 0.373702269                            | N                                            | 0                                      | N                                   |
| PLEKHG1       | 0.373702269                            | N                                            | 0                                      | N                                   |
| POP7          | 0.373702269                            | N                                            | 0                                      | N                                   |
| ZBTB34        | 0.373702269                            | N                                            | 0                                      | N                                   |
| ZXDB          | 0.373702269                            | N                                            | 0                                      | N                                   |
| AC013391.2    | 0.373901441                            | N                                            | 0                                      | N                                   |
| SPA17         | 0.373901441                            | N                                            | 1                                      | N                                   |
| SPTBN4        | 0.373901441                            | N                                            | 0                                      | N                                   |
| YPEL5         | 0.373932528                            | N                                            | 0                                      | N                                   |
| PCAT6         | 0.374271581                            | N                                            | 0                                      | N                                   |
| SLC16A4       | 0.374271581                            | N                                            | 6                                      | N                                   |
| STARD3NL      | 0.374271581                            | N                                            | 0                                      | N                                   |
| RFX3          | 0.374440683                            | N                                            | 3                                      | N                                   |
| AC000403.1    | 0.37503291                             | N                                            | 0                                      | N                                   |
| AL161421.1    | 0.37503291                             | N                                            | 0                                      | N                                   |
| DDAH1         | 0.37503291                             | N                                            | 7                                      | N                                   |
| SNHG18        | 0.37503291                             | N                                            | 0                                      | N                                   |
| UPK1A-AS1     | 0.37503291                             | N                                            | 0                                      | N                                   |
| RWDD2A        | 0.375195526                            | N                                            | 0                                      | N                                   |
| ATP6V0E2-AS1  | 0.375241639                            | N                                            | 0                                      | N                                   |
| TVP23C-CDRT4  | 0.375241639                            | N                                            | 0                                      | N                                   |
| SHC4          | 0.375310451                            | N                                            | 2                                      | N                                   |
| AKAP8         | 0.375848683                            | N                                            | 1                                      | N                                   |
| BBX           | 0.375848683                            | N                                            | 1                                      | N                                   |
| BNIP2         | 0.375848683                            | N                                            | 0                                      | N                                   |
| CBFB          | 0.375848683                            | N                                            | 2                                      | N                                   |
| CDAN1         | 0.375848683                            | N                                            | 0                                      | N                                   |
| CLCA2         | 0.375848683                            | N                                            | 0                                      | N                                   |
| CTD-2521M24.9 | 0.375848683                            | N                                            | 0                                      | N                                   |
| DSE           | 0.375848683                            | N                                            | 19                                     | N                                   |
| ENOX1-AS1     | 0.375848683                            | N                                            | 0                                      | N                                   |
| FIGL2         | 0.375848683                            | N                                            | 0                                      | N                                   |
| HIST1H4F      | 0.375848683                            | N                                            | 0                                      | N                                   |
| HPRT1P1       | 0.375848683                            | N                                            | 0                                      | N                                   |
| KPTN          | 0.375848683                            | N                                            | 0                                      | N                                   |
| MFS2A         | 0.375848683                            | N                                            | 1                                      | N                                   |
| PPIEL         | 0.375848683                            | N                                            | 0                                      | N                                   |
| PTGFRN        | 0.375848683                            | N                                            | 1                                      | N                                   |
| SCUBE1        | 0.375848683                            | N                                            | 2                                      | N                                   |
| TRPS1         | 0.375848683                            | N                                            | 1                                      | N                                   |
| AC092620.2    | 0.37605123                             | N                                            | 0                                      | N                                   |
| AMH           | 0.37605123                             | N                                            | 236                                    | Y                                   |
| C19orf48      | 0.37605123                             | N                                            | 0                                      | N                                   |
| C1orf229      | 0.37605123                             | N                                            | 0                                      | N                                   |
| C1orf54       | 0.37605123                             | N                                            | 0                                      | N                                   |
| GNAQ          | 0.37605123                             | N                                            | 4                                      | N                                   |
| IPPK1         | 0.37605123                             | N                                            | 0                                      | N                                   |
| MYLK3         | 0.37605123                             | N                                            | 0                                      | N                                   |



| Gene symbols | FDR (differential expression analysis) | Differentially expressed gene? Y, Yes; N, No | Number of insulin related publications | Insulin related gene? Y, Yes; N, No |
|--------------|----------------------------------------|----------------------------------------------|----------------------------------------|-------------------------------------|
| RAD51AP1     | 0.37605123                             | N                                            | 1                                      | N                                   |
| SFT2D2       | 0.37605123                             | N                                            | 0                                      | N                                   |
| OLFML3       | 0.37614392                             | N                                            | 0                                      | N                                   |
| AC099811.1   | 0.376252041                            | N                                            | 0                                      | N                                   |
| CBR3         | 0.376366975                            | N                                            | 4                                      | N                                   |
| GJC2         | 0.376366975                            | N                                            | 0                                      | N                                   |
| HAS2         | 0.376366975                            | N                                            | 19                                     | N                                   |
| ODF2L        | 0.376366975                            | N                                            | 0                                      | N                                   |
| IGFBP7       | 0.376443064                            | N                                            | 282                                    | Y                                   |
| PSAP         | 0.376443064                            | N                                            | 10                                     | N                                   |
| F2RL2        | 0.376580577                            | N                                            | 1                                      | N                                   |
| INPP5B       | 0.376996513                            | N                                            | 1                                      | N                                   |
| HSPE1P13     | 0.377051228                            | N                                            | 0                                      | N                                   |
| BCS1L        | 0.377221512                            | N                                            | 1                                      | N                                   |
| ESPNP        | 0.377221512                            | N                                            | 0                                      | N                                   |
| ZNF37BP      | 0.377221512                            | N                                            | 0                                      | N                                   |
| AC062017.1   | 0.37753264                             | N                                            | 0                                      | N                                   |
| AC137630.1   | 0.37753264                             | N                                            | 0                                      | N                                   |
| C15orf41     | 0.37753264                             | N                                            | 0                                      | N                                   |
| CSNK1A1      | 0.37753264                             | N                                            | 0                                      | N                                   |
| FARP2        | 0.37753264                             | N                                            | 0                                      | N                                   |
| FEN1         | 0.37753264                             | N                                            | 3                                      | N                                   |
| LINC02486    | 0.37753264                             | N                                            | 0                                      | N                                   |
| PER3         | 0.37753264                             | N                                            | 25                                     | N                                   |
| RNM1L1P2     | 0.37753264                             | N                                            | 0                                      | N                                   |
| TBCD         | 0.37753264                             | N                                            | 0                                      | N                                   |
| TLX2         | 0.37753264                             | N                                            | 1                                      | N                                   |
| TUBA1C       | 0.37753264                             | N                                            | 0                                      | N                                   |
| ZNF275       | 0.37753264                             | N                                            | 0                                      | N                                   |
| TRNP1        | 0.377719149                            | N                                            | 0                                      | N                                   |
| MAML2        | 0.378127639                            | N                                            | 0                                      | N                                   |
| SLC6A8       | 0.378127639                            | N                                            | 2                                      | N                                   |
| ZFPM2-AS1    | 0.378251402                            | N                                            | 0                                      | N                                   |
| FBXO11       | 0.378420377                            | N                                            | 1                                      | N                                   |
| GARNL3       | 0.378420377                            | N                                            | 0                                      | N                                   |
| AC090398.1   | 0.378758391                            | N                                            | 0                                      | N                                   |
| IL34         | 0.37934727                             | N                                            | 0                                      | N                                   |
| SLC35F6      | 0.37934727                             | N                                            | 0                                      | N                                   |
| SLC36A1      | 0.37934727                             | N                                            | 8                                      | N                                   |
| STX6         | 0.37934727                             | N                                            | 2                                      | N                                   |
| ACTR3B       | 0.379389081                            | N                                            | 0                                      | N                                   |
| KCNB1        | 0.379389081                            | N                                            | 32                                     | N                                   |
| PIGT         | 0.379928597                            | N                                            | 3                                      | N                                   |
| SPAG8        | 0.380019171                            | N                                            | 1                                      | N                                   |
| AC005618.2   | 0.380046736                            | N                                            | 0                                      | N                                   |
| SLC2A3       | 0.380342907                            | N                                            | 132                                    | Y                                   |
| FANCA        | 0.380491884                            | N                                            | 5                                      | N                                   |
| SPATA33      | 0.381065516                            | N                                            | 0                                      | N                                   |
| MESTP3       | 0.381214788                            | N                                            | 0                                      | N                                   |
| ASB4         | 0.381232369                            | N                                            | 4                                      | N                                   |
| PPP2CA       | 0.38139232                             | N                                            | 6                                      | N                                   |
| DCLK2        | 0.381500296                            | N                                            | 0                                      | N                                   |
| AC032011.1   | 0.381536068                            | N                                            | 0                                      | N                                   |
| BOLA3        | 0.381536068                            | N                                            | 0                                      | N                                   |
| BSN-AS2      | 0.381536068                            | N                                            | 0                                      | N                                   |
| BUB1B-PAK6   | 0.381536068                            | N                                            | 0                                      | N                                   |
| COLGALT2     | 0.381536068                            | N                                            | 0                                      | N                                   |
| GNG4         | 0.381536068                            | N                                            | 1                                      | N                                   |
| MYO15A       | 0.381536068                            | N                                            | 0                                      | N                                   |
| SRD5A2       | 0.381536068                            | N                                            | 44                                     | N                                   |
| USP46        | 0.381536068                            | N                                            | 0                                      | N                                   |
| AC107871.1   | 0.38154994                             | N                                            | 0                                      | N                                   |
| AC135803.1   | 0.38154994                             | N                                            | 0                                      | N                                   |
| AL078645.1   | 0.38154994                             | N                                            | 0                                      | N                                   |
| HIST1H1C     | 0.38154994                             | N                                            | 0                                      | N                                   |
| KDM5C-IT1    | 0.38154994                             | N                                            | 0                                      | N                                   |

| Gene symbols  | FDR (differential expression analysis) | Differentially expressed gene? Y, Yes; N, No | Number of insulin related publications | Insulin related gene? Y, Yes; N, No |
|---------------|----------------------------------------|----------------------------------------------|----------------------------------------|-------------------------------------|
| OSTCP5        | 0.38154994                             | N                                            | 0                                      | N                                   |
| SLC35F4       | 0.38154994                             | N                                            | 0                                      | N                                   |
| THOP1         | 0.38154994                             | N                                            | 0                                      | N                                   |
| ZNF559-ZNF177 | 0.38154994                             | N                                            | 0                                      | N                                   |
| CHD6          | 0.382529905                            | N                                            | 0                                      | N                                   |
| PRKACB        | 0.382529905                            | N                                            | 1                                      | N                                   |
| MAF           | 0.382551605                            | N                                            | 323                                    | Y                                   |
| TIMP2         | 0.382551605                            | N                                            | 91                                     | N                                   |
| PRIMPOL       | 0.382735231                            | N                                            | 0                                      | N                                   |
| GALNT10       | 0.382879462                            | N                                            | 0                                      | N                                   |
| H3F3B         | 0.382879462                            | N                                            | 0                                      | N                                   |
| RRP36         | 0.382879462                            | N                                            | 0                                      | N                                   |
| GSN           | 0.38291343                             | N                                            | 5                                      | N                                   |
| APBB3         | 0.383380842                            | N                                            | 0                                      | N                                   |
| DLX1          | 0.383380842                            | N                                            | 2                                      | N                                   |
| IQSEC2        | 0.383380842                            | N                                            | 1                                      | N                                   |
| AL356124.1    | 0.383581423                            | N                                            | 0                                      | N                                   |
| FBXO25        | 0.383581423                            | N                                            | 0                                      | N                                   |
| XBPIP1        | 0.383581423                            | N                                            | 0                                      | N                                   |
| CSNK1G1       | 0.383583806                            | N                                            | 0                                      | N                                   |
| EBP           | 0.383583806                            | N                                            | 445                                    | Y                                   |
| EIF4BP6       | 0.383583806                            | N                                            | 0                                      | N                                   |
| ZBTB2         | 0.383583806                            | N                                            | 1                                      | N                                   |
| AL353726.2    | 0.383627051                            | N                                            | 0                                      | N                                   |
| AL354943.1    | 0.383681134                            | N                                            | 0                                      | N                                   |
| AL359232.1    | 0.383681134                            | N                                            | 0                                      | N                                   |
| CMSS1         | 0.383681134                            | N                                            | 0                                      | N                                   |
| GGPS1         | 0.383681134                            | N                                            | 6                                      | N                                   |
| MRPS26        | 0.383681134                            | N                                            | 0                                      | N                                   |
| RNVU1-6       | 0.383681134                            | N                                            | 0                                      | N                                   |
| ZNF280D       | 0.383681134                            | N                                            | 0                                      | N                                   |
| TMEM213       | 0.384115503                            | N                                            | 0                                      | N                                   |
| AC006504.1    | 0.384238503                            | N                                            | 0                                      | N                                   |
| AC099398.1    | 0.384238503                            | N                                            | 0                                      | N                                   |
| AC138907.10   | 0.384238503                            | N                                            | 0                                      | N                                   |
| ACYP2         | 0.384238503                            | N                                            | 0                                      | N                                   |
| GALT          | 0.384238503                            | N                                            | 18                                     | N                                   |
| MPZL3         | 0.384238503                            | N                                            | 1                                      | N                                   |
| NUBP1         | 0.384238503                            | N                                            | 1                                      | N                                   |
| B3GALT2       | 0.384868061                            | N                                            | 0                                      | N                                   |
| PDIA3P1       | 0.384868061                            | N                                            | 0                                      | N                                   |
| PPP3CB        | 0.384868061                            | N                                            | 2                                      | N                                   |
| SLC1A5        | 0.384868061                            | N                                            | 15                                     | N                                   |
| SLC35C2       | 0.384868061                            | N                                            | 0                                      | N                                   |
| USP30         | 0.384868061                            | N                                            | 0                                      | N                                   |
| ZNF106        | 0.384942759                            | N                                            | 0                                      | N                                   |
| AC008040.3    | 0.385044473                            | N                                            | 0                                      | N                                   |
| AC211476.2    | 0.385044473                            | N                                            | 0                                      | N                                   |
| DBT           | 0.385044473                            | N                                            | 26                                     | N                                   |
| DNAJA4        | 0.385044473                            | N                                            | 0                                      | N                                   |
| FUBP1         | 0.385044473                            | N                                            | 0                                      | N                                   |
| ZIC5          | 0.385044473                            | N                                            | 0                                      | N                                   |
| PRAP1         | 0.385294865                            | N                                            | 0                                      | N                                   |
| RAE1          | 0.385294865                            | N                                            | 4                                      | N                                   |
| SLC25A21-AS1  | 0.385294865                            | N                                            | 0                                      | N                                   |
| WRAP53        | 0.385294865                            | N                                            | 1                                      | N                                   |
| FKBP14        | 0.385779057                            | N                                            | 0                                      | N                                   |
| HBP1          | 0.385779057                            | N                                            | 13                                     | N                                   |
| MMP19         | 0.385779057                            | N                                            | 0                                      | N                                   |
| MRPL24        | 0.385779057                            | N                                            | 0                                      | N                                   |
| PLEKHS1       | 0.385779057                            | N                                            | 1                                      | N                                   |
| NEMP1         | 0.385855003                            | N                                            | 0                                      | N                                   |
| AL136298.3    | 0.385951753                            | N                                            | 0                                      | N                                   |
| CISD3         | 0.385951753                            | N                                            | 0                                      | N                                   |
| MCTP1         | 0.385951753                            | N                                            | 0                                      | N                                   |
| TMEM263       | 0.385951753                            | N                                            | 0                                      | N                                   |

| Gene symbols | FDR (differential expression analysis) | Differentially expressed gene? Y, Yes; N, No | Number of insulin related publications | Insulin related gene? Y, Yes; N, No |
|--------------|----------------------------------------|----------------------------------------------|----------------------------------------|-------------------------------------|
| AC026801.3   | 0.38595898                             | N                                            | 0                                      | N                                   |
| FCHO2        | 0.38595898                             | N                                            | 0                                      | N                                   |
| RNASE4       | 0.38595898                             | N                                            | 1                                      | N                                   |
| DRD2         | 0.386380769                            | N                                            | 38                                     | N                                   |
| H2AFY        | 0.386380769                            | N                                            | 1                                      | N                                   |
| NUP85        | 0.386380769                            | N                                            | 0                                      | N                                   |
| SUCLA2P3     | 0.386380769                            | N                                            | 0                                      | N                                   |
| VWA8         | 0.386380769                            | N                                            | 0                                      | N                                   |
| PLP1         | 0.386569235                            | N                                            | 3                                      | N                                   |
| TMEM233      | 0.386720673                            | N                                            | 0                                      | N                                   |
| AC093642.2   | 0.386931138                            | N                                            | 0                                      | N                                   |
| CCNB1IP1     | 0.387060228                            | N                                            | 0                                      | N                                   |
| HTR4         | 0.387093205                            | N                                            | 0                                      | N                                   |
| SDC3         | 0.387093205                            | N                                            | 1                                      | N                                   |
| SNHG5        | 0.387093205                            | N                                            | 1                                      | N                                   |
| Z99127.3     | 0.387093205                            | N                                            | 0                                      | N                                   |
| CYLD         | 0.387093865                            | N                                            | 1                                      | N                                   |
| GDE1         | 0.387093865                            | N                                            | 0                                      | N                                   |
| PDGFD        | 0.387093865                            | N                                            | 1                                      | N                                   |
| KIF1A        | 0.387120117                            | N                                            | 1                                      | N                                   |
| AL031985.3   | 0.387168455                            | N                                            | 0                                      | N                                   |
| GABRA2       | 0.387168455                            | N                                            | 0                                      | N                                   |
| GMPPB        | 0.387168455                            | N                                            | 0                                      | N                                   |
| NDUFAF4P4    | 0.387168455                            | N                                            | 0                                      | N                                   |
| TMEM11       | 0.387168455                            | N                                            | 0                                      | N                                   |
| RIPK3        | 0.387197234                            | N                                            | 7                                      | N                                   |
| RPL37P6      | 0.387318091                            | N                                            | 0                                      | N                                   |
| AC108024.1   | 0.387463773                            | N                                            | 0                                      | N                                   |
| AL159972.1   | 0.387463773                            | N                                            | 0                                      | N                                   |
| RAD51B       | 0.387463773                            | N                                            | 1                                      | N                                   |
| HP1BP3       | 0.387486531                            | N                                            | 1                                      | N                                   |
| FLVCR1-AS1   | 0.387715341                            | N                                            | 0                                      | N                                   |
| EVX2         | 0.387719999                            | N                                            | 0                                      | N                                   |
| RDH10-AS1    | 0.387719999                            | N                                            | 0                                      | N                                   |
| MOCS1P1      | 0.387830273                            | N                                            | 0                                      | N                                   |
| PAFAH1B1     | 0.387830273                            | N                                            | 0                                      | N                                   |
| SNRPF1       | 0.387830273                            | N                                            | 0                                      | N                                   |
| EXOSC8       | 0.388134727                            | N                                            | 0                                      | N                                   |
| LINC00622    | 0.388266335                            | N                                            | 0                                      | N                                   |
| PTCH1        | 0.388645797                            | N                                            | 34                                     | N                                   |
| ZFP3         | 0.388743422                            | N                                            | 0                                      | N                                   |
| JMJD1C       | 0.388850803                            | N                                            | 2                                      | N                                   |
| SEMA4G       | 0.388850803                            | N                                            | 0                                      | N                                   |
| ZNF33A       | 0.388850803                            | N                                            | 0                                      | N                                   |
| ATAD2B       | 0.388998484                            | N                                            | 0                                      | N                                   |
| MAPRE1       | 0.388998484                            | N                                            | 4                                      | N                                   |
| PTTG2        | 0.388998484                            | N                                            | 0                                      | N                                   |
| UBL3         | 0.388998484                            | N                                            | 0                                      | N                                   |
| ADAMTS18     | 0.390188786                            | N                                            | 0                                      | N                                   |
| AL078604.2   | 0.390424143                            | N                                            | 0                                      | N                                   |
| AL163636.2   | 0.390424143                            | N                                            | 0                                      | N                                   |
| CENPS        | 0.390528163                            | N                                            | 1                                      | N                                   |
| CRAT37       | 0.390528163                            | N                                            | 0                                      | N                                   |
| LINC01059    | 0.390528163                            | N                                            | 0                                      | N                                   |
| MRPL37P1     | 0.390528163                            | N                                            | 0                                      | N                                   |
| ZNF48        | 0.390528163                            | N                                            | 0                                      | N                                   |
| AC005495.1   | 0.390785028                            | N                                            | 0                                      | N                                   |
| AC021148.1   | 0.390785028                            | N                                            | 0                                      | N                                   |
| AL449106.1   | 0.390785028                            | N                                            | 0                                      | N                                   |
| ARSA         | 0.390785028                            | N                                            | 6                                      | N                                   |
| CARNS1       | 0.390785028                            | N                                            | 1                                      | N                                   |
| CFAP52       | 0.390785028                            | N                                            | 0                                      | N                                   |
| CMC2         | 0.390785028                            | N                                            | 0                                      | N                                   |
| DNA2         | 0.390785028                            | N                                            | 2                                      | N                                   |
| DPY19L2P1    | 0.390785028                            | N                                            | 0                                      | N                                   |
| FABP3        | 0.390785028                            | N                                            | 49                                     | N                                   |

| Gene symbols   | FDR (differential expression analysis) | Differentially expressed gene? Y, Yes; N, No | Number of insulin related publications | Insulin related gene? Y, Yes; N, No |
|----------------|----------------------------------------|----------------------------------------------|----------------------------------------|-------------------------------------|
| FAM13C         | 0.390785028                            | N                                            | 0                                      | N                                   |
| FN3KRP         | 0.390785028                            | N                                            | 2                                      | N                                   |
| GJA3           | 0.390785028                            | N                                            | 0                                      | N                                   |
| HIST1H2AI      | 0.390785028                            | N                                            | 0                                      | N                                   |
| HLA-J          | 0.390785028                            | N                                            | 1                                      | N                                   |
| HNRNPH1P2      | 0.390785028                            | N                                            | 0                                      | N                                   |
| INSC           | 0.390785028                            | N                                            | 5                                      | N                                   |
| KIF1B          | 0.390785028                            | N                                            | 1                                      | N                                   |
| LINC00174      | 0.390785028                            | N                                            | 0                                      | N                                   |
| LINC00665      | 0.390785028                            | N                                            | 0                                      | N                                   |
| LINC00839      | 0.390785028                            | N                                            | 0                                      | N                                   |
| LIPA           | 0.390785028                            | N                                            | 22                                     | N                                   |
| MRPL11         | 0.390785028                            | N                                            | 0                                      | N                                   |
| NOP56          | 0.390785028                            | N                                            | 1                                      | N                                   |
| PCYT1A         | 0.390785028                            | N                                            | 2                                      | N                                   |
| PLEKHA8        | 0.390785028                            | N                                            | 0                                      | N                                   |
| PRIM1          | 0.390785028                            | N                                            | 1                                      | N                                   |
| PSMG4          | 0.390785028                            | N                                            | 0                                      | N                                   |
| RBM24          | 0.390785028                            | N                                            | 0                                      | N                                   |
| RBM43          | 0.390785028                            | N                                            | 0                                      | N                                   |
| RETREG3        | 0.390785028                            | N                                            | 0                                      | N                                   |
| RP11-434B12.1  | 0.390785028                            | N                                            | 0                                      | N                                   |
| TAF5           | 0.390785028                            | N                                            | 0                                      | N                                   |
| TMEM189-UBE2V1 | 0.390785028                            | N                                            | 0                                      | N                                   |
| TOMM22         | 0.390785028                            | N                                            | 0                                      | N                                   |
| TONSL          | 0.390785028                            | N                                            | 0                                      | N                                   |
| TUBB2B         | 0.390785028                            | N                                            | 1                                      | N                                   |
| UBE4A          | 0.390785028                            | N                                            | 1                                      | N                                   |
| XKR9           | 0.390785028                            | N                                            | 0                                      | N                                   |
| ZFP36L1        | 0.390785028                            | N                                            | 6                                      | N                                   |
| ZNF789         | 0.390785028                            | N                                            | 0                                      | N                                   |
| ZNF883         | 0.390785028                            | N                                            | 0                                      | N                                   |
| AARD           | 0.390826442                            | N                                            | 0                                      | N                                   |
| AC005005.4     | 0.390826442                            | N                                            | 0                                      | N                                   |
| AC007560.1     | 0.390826442                            | N                                            | 0                                      | N                                   |
| COA6           | 0.390826442                            | N                                            | 0                                      | N                                   |
| DERA           | 0.390826442                            | N                                            | 3                                      | N                                   |
| DNMBP-AS1      | 0.390826442                            | N                                            | 0                                      | N                                   |
| KBTBD13        | 0.390826442                            | N                                            | 0                                      | N                                   |
| LOX            | 0.390826442                            | N                                            | 201                                    | Y                                   |
| NOTUM          | 0.390826442                            | N                                            | 2                                      | N                                   |
| PDXDC1         | 0.390826442                            | N                                            | 2                                      | N                                   |
| RCSD1          | 0.390826442                            | N                                            | 0                                      | N                                   |
| SCAF8          | 0.390826442                            | N                                            | 0                                      | N                                   |
| SNCAIP         | 0.390826442                            | N                                            | 0                                      | N                                   |
| ZNF641         | 0.390826442                            | N                                            | 0                                      | N                                   |
| ZNF696         | 0.390826442                            | N                                            | 0                                      | N                                   |
| RUNX1T1        | 0.390955718                            | N                                            | 3                                      | N                                   |
| AC127070.3     | 0.391027467                            | N                                            | 0                                      | N                                   |
| AC139700.1     | 0.391027467                            | N                                            | 0                                      | N                                   |
| LPGAT1         | 0.391027467                            | N                                            | 1                                      | N                                   |
| METTL21A       | 0.391027467                            | N                                            | 0                                      | N                                   |
| RASL11B        | 0.391027467                            | N                                            | 0                                      | N                                   |
| ZEB1           | 0.391027467                            | N                                            | 21                                     | N                                   |
| ZNF557         | 0.391027467                            | N                                            | 0                                      | N                                   |
| AC068760.1     | 0.391143094                            | N                                            | 0                                      | N                                   |
| ANKH           | 0.391143094                            | N                                            | 4                                      | N                                   |
| APOO           | 0.391143094                            | N                                            | 1                                      | N                                   |
| C1QTNF2        | 0.391143094                            | N                                            | 0                                      | N                                   |
| CLGN           | 0.391143094                            | N                                            | 1                                      | N                                   |
| FREM2          | 0.391143094                            | N                                            | 0                                      | N                                   |
| METTL27        | 0.391143094                            | N                                            | 0                                      | N                                   |
| NAV2           | 0.391143094                            | N                                            | 0                                      | N                                   |
| SLC25A5        | 0.391143094                            | N                                            | 0                                      | N                                   |
| ZSCAN23        | 0.391143094                            | N                                            | 0                                      | N                                   |
| AC003092.1     | 0.391407459                            | N                                            | 0                                      | N                                   |

| Gene symbols | FDR (differential expression analysis) | Differentially expressed gene? Y, Yes; N, No | Number of insulin related publications | Insulin related gene? Y, Yes; N, No |
|--------------|----------------------------------------|----------------------------------------------|----------------------------------------|-------------------------------------|
| AC009032.1   | 0.391407459                            | N                                            | 0                                      | N                                   |
| AC026150.1   | 0.391407459                            | N                                            | 0                                      | N                                   |
| ACER2        | 0.391407459                            | N                                            | 1                                      | N                                   |
| C4orf46      | 0.391407459                            | N                                            | 0                                      | N                                   |
| CCDC180      | 0.391407459                            | N                                            | 0                                      | N                                   |
| CIRBP-AS1    | 0.391407459                            | N                                            | 0                                      | N                                   |
| CRLS1        | 0.391407459                            | N                                            | 1                                      | N                                   |
| DMXL1        | 0.391407459                            | N                                            | 0                                      | N                                   |
| DUSP16       | 0.391407459                            | N                                            | 4                                      | N                                   |
| HECA         | 0.391407459                            | N                                            | 1                                      | N                                   |
| HIST1H2BG    | 0.391407459                            | N                                            | 0                                      | N                                   |
| HIST1H2BN    | 0.391407459                            | N                                            | 0                                      | N                                   |
| LANCL3       | 0.391407459                            | N                                            | 0                                      | N                                   |
| MSR1         | 0.391407459                            | N                                            | 6                                      | N                                   |
| NOG          | 0.391407459                            | N                                            | 8                                      | N                                   |
| NTRK1        | 0.391407459                            | N                                            | 4                                      | N                                   |
| PRELID1      | 0.391407459                            | N                                            | 0                                      | N                                   |
| PRR34-AS1    | 0.391407459                            | N                                            | 0                                      | N                                   |
| PSPC1        | 0.391407459                            | N                                            | 1                                      | N                                   |
| TPM3         | 0.391407459                            | N                                            | 55                                     | N                                   |
| TPTE2P6      | 0.391407459                            | N                                            | 0                                      | N                                   |
| AC090877.2   | 0.391451167                            | N                                            | 0                                      | N                                   |
| AL121944.1   | 0.391451167                            | N                                            | 0                                      | N                                   |
| C21orf59     | 0.391451167                            | N                                            | 0                                      | N                                   |
| DLG2         | 0.391451167                            | N                                            | 3                                      | N                                   |
| IPCEF1       | 0.391451167                            | N                                            | 0                                      | N                                   |
| UBLCP1       | 0.391451167                            | N                                            | 0                                      | N                                   |
| ZNF415       | 0.391451167                            | N                                            | 0                                      | N                                   |
| DPY19L3      | 0.391610892                            | N                                            | 0                                      | N                                   |
| TERF2IP      | 0.391610892                            | N                                            | 4                                      | N                                   |
| AC016027.3   | 0.391656105                            | N                                            | 0                                      | N                                   |
| ASB16-AS1    | 0.391656105                            | N                                            | 0                                      | N                                   |
| MKI67P1      | 0.391656105                            | N                                            | 0                                      | N                                   |
| OR10A6       | 0.391656105                            | N                                            | 0                                      | N                                   |
| AC007485.2   | 0.39172996                             | N                                            | 0                                      | N                                   |
| CD33         | 0.39172996                             | N                                            | 11                                     | N                                   |
| FKBP4P1      | 0.39172996                             | N                                            | 0                                      | N                                   |
| TTC25        | 0.39202971                             | N                                            | 0                                      | N                                   |
| C1orf198     | 0.392033633                            | N                                            | 0                                      | N                                   |
| ADCY9        | 0.392058059                            | N                                            | 1                                      | N                                   |
| AL357134.1   | 0.392058059                            | N                                            | 0                                      | N                                   |
| CUL7         | 0.392058059                            | N                                            | 14                                     | N                                   |
| FBXW11       | 0.392058059                            | N                                            | 0                                      | N                                   |
| MRPL39       | 0.392058059                            | N                                            | 0                                      | N                                   |
| POP1         | 0.392058059                            | N                                            | 0                                      | N                                   |
| PRMT7        | 0.392058059                            | N                                            | 0                                      | N                                   |
| PTEN         | 0.392058059                            | N                                            | 819                                    | Y                                   |
| RRAGB        | 0.392058059                            | N                                            | 1                                      | N                                   |
| SCIN         | 0.392058059                            | N                                            | 0                                      | N                                   |
| SLC25A19     | 0.392058059                            | N                                            | 0                                      | N                                   |
| TAF1A        | 0.392058059                            | N                                            | 0                                      | N                                   |
| ZBTB16       | 0.392058059                            | N                                            | 12                                     | N                                   |
| GRHL2        | 0.392159864                            | N                                            | 0                                      | N                                   |
| HSPB6        | 0.392159864                            | N                                            | 9                                      | N                                   |
| Z83843.1     | 0.392159864                            | N                                            | 0                                      | N                                   |
| AL160006.1   | 0.392182673                            | N                                            | 0                                      | N                                   |
| FJX1         | 0.392182673                            | N                                            | 0                                      | N                                   |
| KMT5A        | 0.392182673                            | N                                            | 0                                      | N                                   |
| ADAM32       | 0.392310035                            | N                                            | 1                                      | N                                   |
| NRSN2        | 0.392310035                            | N                                            | 0                                      | N                                   |
| CFAP69       | 0.392337305                            | N                                            | 0                                      | N                                   |
| GPR75        | 0.392337305                            | N                                            | 3                                      | N                                   |
| AC022364.1   | 0.392703302                            | N                                            | 0                                      | N                                   |
| ATL2         | 0.392703302                            | N                                            | 1                                      | N                                   |
| TUFT1        | 0.392703302                            | N                                            | 0                                      | N                                   |
| COL8A2       | 0.392713075                            | N                                            | 0                                      | N                                   |

| Gene symbols | FDR (differential expression analysis) | Differentially expressed gene? Y, Yes; N, No | Number of insulin related publications | Insulin related gene? Y, Yes; N, No |
|--------------|----------------------------------------|----------------------------------------------|----------------------------------------|-------------------------------------|
| AC005324.3   | 0.393134059                            | N                                            | 0                                      | N                                   |
| AC007923.1   | 0.393134059                            | N                                            | 0                                      | N                                   |
| CNTNAP4      | 0.393134059                            | N                                            | 1                                      | N                                   |
| ETV6         | 0.393134059                            | N                                            | 14                                     | N                                   |
| HVCN1        | 0.393785982                            | N                                            | 0                                      | N                                   |
| GRK6P1       | 0.393813077                            | N                                            | 0                                      | N                                   |
| HIST1H4B     | 0.393884593                            | N                                            | 0                                      | N                                   |
| PUM1         | 0.39395312                             | N                                            | 0                                      | N                                   |
| CXCL1        | 0.394311476                            | N                                            | 79                                     | N                                   |
| AP001527.2   | 0.394470763                            | N                                            | 0                                      | N                                   |
| GPATCH4      | 0.394715889                            | N                                            | 0                                      | N                                   |
| JPT2         | 0.394826919                            | N                                            | 0                                      | N                                   |
| AC068446.1   | 0.394934002                            | N                                            | 0                                      | N                                   |
| SCGB2B2      | 0.394992125                            | N                                            | 0                                      | N                                   |
| CHRM2        | 0.395040553                            | N                                            | 2                                      | N                                   |
| AC008507.4   | 0.395214252                            | N                                            | 0                                      | N                                   |
| AC020658.4   | 0.395214252                            | N                                            | 0                                      | N                                   |
| CCDC129      | 0.395214252                            | N                                            | 0                                      | N                                   |
| NCOA4        | 0.395214252                            | N                                            | 0                                      | N                                   |
| SQSTM1       | 0.395214252                            | N                                            | 75                                     | N                                   |
| AL133387.2   | 0.395528465                            | N                                            | 0                                      | N                                   |
| DYNLL1P1     | 0.395715849                            | N                                            | 0                                      | N                                   |
| GAS7         | 0.395715849                            | N                                            | 4                                      | N                                   |
| LILRB5       | 0.395715849                            | N                                            | 0                                      | N                                   |
| LINC01232    | 0.395715849                            | N                                            | 0                                      | N                                   |
| NUP205       | 0.395715849                            | N                                            | 0                                      | N                                   |
| PCK2         | 0.395715849                            | N                                            | 31                                     | N                                   |
| PWRN1        | 0.395715849                            | N                                            | 0                                      | N                                   |
| SASS6        | 0.395715849                            | N                                            | 0                                      | N                                   |
| AL031733.2   | 0.395797894                            | N                                            | 0                                      | N                                   |
| TARDBPP2     | 0.395957557                            | N                                            | 0                                      | N                                   |
| CD6          | 0.396565638                            | N                                            | 1                                      | N                                   |
| LINC00623    | 0.396565638                            | N                                            | 0                                      | N                                   |
| LINC01060    | 0.396565638                            | N                                            | 0                                      | N                                   |
| PSG3         | 0.396565638                            | N                                            | 0                                      | N                                   |
| C8orf86      | 0.396592159                            | N                                            | 0                                      | N                                   |
| MOAP1        | 0.396592159                            | N                                            | 0                                      | N                                   |
| COPG1        | 0.396750446                            | N                                            | 1                                      | N                                   |
| GLP2R        | 0.396750446                            | N                                            | 17                                     | N                                   |
| MTHFD1       | 0.396750446                            | N                                            | 0                                      | N                                   |
| VPS37A       | 0.396750446                            | N                                            | 0                                      | N                                   |
| CCDC89       | 0.396778135                            | N                                            | 0                                      | N                                   |
| FGF20        | 0.396778135                            | N                                            | 4                                      | N                                   |
| SLC4A5       | 0.396778135                            | N                                            | 0                                      | N                                   |
| RAB33B       | 0.396945512                            | N                                            | 0                                      | N                                   |
| AC092284.1   | 0.396969165                            | N                                            | 0                                      | N                                   |
| CDCA8        | 0.396969165                            | N                                            | 0                                      | N                                   |
| CEP126       | 0.396969165                            | N                                            | 0                                      | N                                   |
| DPYD         | 0.396969165                            | N                                            | 1                                      | N                                   |
| GLT8D2       | 0.396969165                            | N                                            | 0                                      | N                                   |
| MYH9         | 0.396969165                            | N                                            | 4                                      | N                                   |
| SUZ12        | 0.396969165                            | N                                            | 10                                     | N                                   |
| ZGRF1        | 0.396969165                            | N                                            | 1                                      | N                                   |
| FAM182A      | 0.397116391                            | N                                            | 0                                      | N                                   |
| PTCD2        | 0.397116391                            | N                                            | 0                                      | N                                   |
| AP005119.2   | 0.39713661                             | N                                            | 0                                      | N                                   |
| CLIC1        | 0.39713661                             | N                                            | 4                                      | N                                   |
| LINC00441    | 0.39713661                             | N                                            | 0                                      | N                                   |
| PRR5L        | 0.39713661                             | N                                            | 0                                      | N                                   |
| TGFB2        | 0.39713661                             | N                                            | 130                                    | Y                                   |
| THOC1        | 0.39713661                             | N                                            | 1                                      | N                                   |
| AL031714.1   | 0.397257373                            | N                                            | 0                                      | N                                   |
| AL589935.1   | 0.397257373                            | N                                            | 0                                      | N                                   |
| C1orf228     | 0.397257373                            | N                                            | 0                                      | N                                   |
| FOXMI        | 0.397257373                            | N                                            | 48                                     | N                                   |
| GJA1         | 0.397257373                            | N                                            | 22                                     | N                                   |

| Gene symbols | FDR (differential expression analysis) | Differentially expressed gene? Y, Yes; N, No | Number of insulin related publications | Insulin related gene? Y, Yes; N, No |
|--------------|----------------------------------------|----------------------------------------------|----------------------------------------|-------------------------------------|
| GPR146       | 0.397257373                            | N                                            | 5                                      | N                                   |
| HSP90B3P     | 0.397257373                            | N                                            | 0                                      | N                                   |
| MPDU1        | 0.397257373                            | N                                            | 0                                      | N                                   |
| RNPS1        | 0.397257373                            | N                                            | 1                                      | N                                   |
| FAM189A1     | 0.397517575                            | N                                            | 0                                      | N                                   |
| MID1         | 0.397517575                            | N                                            | 2                                      | N                                   |
| CCDC186      | 0.397643656                            | N                                            | 0                                      | N                                   |
| HIST1H4I     | 0.397643656                            | N                                            | 0                                      | N                                   |
| PRRX1        | 0.397643656                            | N                                            | 8                                      | N                                   |
| HMGXB4       | 0.397652902                            | N                                            | 0                                      | N                                   |
| LINC00930    | 0.39766543                             | N                                            | 0                                      | N                                   |
| HDGF         | 0.397847674                            | N                                            | 5                                      | N                                   |
| SCAMP1-AS1   | 0.397847674                            | N                                            | 0                                      | N                                   |
| SLC35B1      | 0.3978914                              | N                                            | 0                                      | N                                   |
| LYRM9        | 0.39835453                             | N                                            | 0                                      | N                                   |
| CBFA2T2      | 0.398424485                            | N                                            | 0                                      | N                                   |
| HTR2A        | 0.398424485                            | N                                            | 6                                      | N                                   |
| KMT2E        | 0.398424485                            | N                                            | 1                                      | N                                   |
| MVB12B       | 0.398424485                            | N                                            | 0                                      | N                                   |
| PLK1         | 0.398424485                            | N                                            | 16                                     | N                                   |
| GATA3        | 0.398451243                            | N                                            | 38                                     | N                                   |
| TPR          | 0.398451243                            | N                                            | 27                                     | N                                   |
| AFAP1        | 0.398456444                            | N                                            | 0                                      | N                                   |
| ASH1L        | 0.398456444                            | N                                            | 1                                      | N                                   |
| AC011503.1   | 0.398754359                            | N                                            | 0                                      | N                                   |
| AL118516.1   | 0.398754359                            | N                                            | 0                                      | N                                   |
| COL28A1      | 0.398754359                            | N                                            | 0                                      | N                                   |
| KANK3        | 0.398754359                            | N                                            | 0                                      | N                                   |
| NRM          | 0.398754359                            | N                                            | 5                                      | N                                   |
| AC004835.1   | 0.398779266                            | N                                            | 0                                      | N                                   |
| ANKLE1       | 0.398779266                            | N                                            | 0                                      | N                                   |
| C21orf33     | 0.398779266                            | N                                            | 1                                      | N                                   |
| CERS6        | 0.398779266                            | N                                            | 9                                      | N                                   |
| LDHBP2       | 0.398779266                            | N                                            | 0                                      | N                                   |
| LINC01311    | 0.398779266                            | N                                            | 0                                      | N                                   |
| RBM5         | 0.398779266                            | N                                            | 0                                      | N                                   |
| SLC39A14     | 0.398779266                            | N                                            | 10                                     | N                                   |
| SURF2        | 0.398779266                            | N                                            | 0                                      | N                                   |
| TRG-AS1      | 0.398779266                            | N                                            | 0                                      | N                                   |
| CCDC148      | 0.398829329                            | N                                            | 0                                      | N                                   |
| FLVCR2       | 0.398829329                            | N                                            | 0                                      | N                                   |
| HIST1H2AG    | 0.398829329                            | N                                            | 0                                      | N                                   |
| IRS2         | 0.398829329                            | N                                            | 1000                                   | Y                                   |
| KRTAP1-1     | 0.398829329                            | N                                            | 0                                      | N                                   |
| LURAP1L      | 0.398829329                            | N                                            | 0                                      | N                                   |
| ZNF136       | 0.398829329                            | N                                            | 0                                      | N                                   |
| AC011477.2   | 0.399248627                            | N                                            | 0                                      | N                                   |
| AC004656.1   | 0.399252281                            | N                                            | 0                                      | N                                   |
| RNF187       | 0.399278097                            | N                                            | 0                                      | N                                   |
| RNF146       | 0.399439363                            | N                                            | 0                                      | N                                   |
| ENTPD3-AS1   | 0.399512505                            | N                                            | 0                                      | N                                   |
| F2RL1        | 0.399512505                            | N                                            | 3                                      | N                                   |
| GAB1         | 0.399512505                            | N                                            | 59                                     | N                                   |
| MAGI3        | 0.399512505                            | N                                            | 0                                      | N                                   |
| MAGOHB       | 0.399512505                            | N                                            | 0                                      | N                                   |
| MKLN1        | 0.399512505                            | N                                            | 1                                      | N                                   |
| MRE11P1      | 0.399512505                            | N                                            | 0                                      | N                                   |
| ZNF260       | 0.399512505                            | N                                            | 0                                      | N                                   |
| CENPB        | 0.399531111                            | N                                            | 1                                      | N                                   |
| CDK5         | 0.399772783                            | N                                            | 103                                    | Y                                   |
| MAN1A2       | 0.400193126                            | N                                            | 0                                      | N                                   |
| C5orf46      | 0.40024872                             | N                                            | 1                                      | N                                   |
| CHTF18       | 0.40024872                             | N                                            | 0                                      | N                                   |
| GBX2         | 0.40024872                             | N                                            | 2                                      | N                                   |
| ZNF665       | 0.400372515                            | N                                            | 0                                      | N                                   |
| METTL4       | 0.400416802                            | N                                            | 0                                      | N                                   |

| Gene symbols | FDR (differential expression analysis) | Differentially expressed gene? Y, Yes; N, No | Number of insulin related publications | Insulin related gene? Y, Yes; N, No |
|--------------|----------------------------------------|----------------------------------------------|----------------------------------------|-------------------------------------|
| AL138847.1   | 0.400479418                            | N                                            | 0                                      | N                                   |
| AC006019.1   | 0.400551833                            | N                                            | 0                                      | N                                   |
| AC124066.1   | 0.400900484                            | N                                            | 0                                      | N                                   |
| CENPP        | 0.400900484                            | N                                            | 0                                      | N                                   |
| FOXD4L5      | 0.400900484                            | N                                            | 0                                      | N                                   |
| KCTD8        | 0.400900484                            | N                                            | 0                                      | N                                   |
| LINC01347    | 0.400900484                            | N                                            | 0                                      | N                                   |
| PKMP3        | 0.400900484                            | N                                            | 0                                      | N                                   |
| TUBD1        | 0.400900484                            | N                                            | 0                                      | N                                   |
| Z99129.4     | 0.400900484                            | N                                            | 0                                      | N                                   |
| AC068993.1   | 0.400950571                            | N                                            | 0                                      | N                                   |
| EN1          | 0.400950571                            | N                                            | 7                                      | N                                   |
| NAP1L4P1     | 0.400950571                            | N                                            | 0                                      | N                                   |
| DEC1         | 0.401007814                            | N                                            | 4                                      | N                                   |
| AHSA1        | 0.401192531                            | N                                            | 2                                      | N                                   |
| SNHG9        | 0.401222377                            | N                                            | 0                                      | N                                   |
| FBXO5        | 0.401227123                            | N                                            | 0                                      | N                                   |
| NLRP10       | 0.401320571                            | N                                            | 0                                      | N                                   |
| TMEM177      | 0.401320571                            | N                                            | 0                                      | N                                   |
| TPBG         | 0.401320571                            | N                                            | 0                                      | N                                   |
| TPPP         | 0.401320571                            | N                                            | 0                                      | N                                   |
| AC096564.2   | 0.401556611                            | N                                            | 0                                      | N                                   |
| CA5B         | 0.401556611                            | N                                            | 0                                      | N                                   |
| YTHDF3-AS1   | 0.401556611                            | N                                            | 0                                      | N                                   |
| LINC00891    | 0.401651699                            | N                                            | 0                                      | N                                   |
| MSANTD4      | 0.401651699                            | N                                            | 0                                      | N                                   |
| TMEM98       | 0.401651699                            | N                                            | 0                                      | N                                   |
| UBA6-AS1     | 0.401651699                            | N                                            | 0                                      | N                                   |
| ZNF790-AS1   | 0.401651699                            | N                                            | 0                                      | N                                   |
| ZUFSP        | 0.40178411                             | N                                            | 0                                      | N                                   |
| CARF         | 0.401860115                            | N                                            | 1                                      | N                                   |
| RAP2C-AS1    | 0.401860115                            | N                                            | 0                                      | N                                   |
| RUVBL1       | 0.401860115                            | N                                            | 2                                      | N                                   |
| UBE2D3P2     | 0.401860115                            | N                                            | 0                                      | N                                   |
| PABPC3       | 0.401918913                            | N                                            | 0                                      | N                                   |
| PDE11A       | 0.402137201                            | N                                            | 3                                      | N                                   |
| AC243964.2   | 0.402538696                            | N                                            | 0                                      | N                                   |
| DSN1         | 0.402538696                            | N                                            | 0                                      | N                                   |
| AC015911.7   | 0.402553933                            | N                                            | 0                                      | N                                   |
| AC026333.4   | 0.402553933                            | N                                            | 0                                      | N                                   |
| AL049733.1   | 0.402553933                            | N                                            | 0                                      | N                                   |
| AL356599.1   | 0.402553933                            | N                                            | 0                                      | N                                   |
| BRCA1        | 0.402553933                            | N                                            | 101                                    | Y                                   |
| C1GALT1C1L   | 0.402553933                            | N                                            | 0                                      | N                                   |
| CABP4        | 0.402553933                            | N                                            | 1                                      | N                                   |
| CD163        | 0.402553933                            | N                                            | 88                                     | N                                   |
| CIB1         | 0.402553933                            | N                                            | 2                                      | N                                   |
| CYGB         | 0.402553933                            | N                                            | 3                                      | N                                   |
| DEPTOR       | 0.402553933                            | N                                            | 23                                     | N                                   |
| GLRX5        | 0.402553933                            | N                                            | 0                                      | N                                   |
| LAMC2        | 0.402553933                            | N                                            | 3                                      | N                                   |
| LUM          | 0.402553933                            | N                                            | 69                                     | N                                   |
| PYGL         | 0.402553933                            | N                                            | 3                                      | N                                   |
| SLC25A35     | 0.402553933                            | N                                            | 0                                      | N                                   |
| AP2B1        | 0.402725192                            | N                                            | 0                                      | N                                   |
| MINDY3       | 0.402725192                            | N                                            | 0                                      | N                                   |
| TTC39A       | 0.402770203                            | N                                            | 0                                      | N                                   |
| AC013355.1   | 0.403311465                            | N                                            | 0                                      | N                                   |
| AC016747.1   | 0.403311465                            | N                                            | 0                                      | N                                   |
| AC079089.3   | 0.403311465                            | N                                            | 0                                      | N                                   |
| AC079336.6   | 0.403311465                            | N                                            | 0                                      | N                                   |
| AL354893.2   | 0.403311465                            | N                                            | 0                                      | N                                   |
| AP004607.3   | 0.403311465                            | N                                            | 0                                      | N                                   |
| CREB3L4      | 0.403311465                            | N                                            | 2                                      | N                                   |
| DLEU1        | 0.403311465                            | N                                            | 1                                      | N                                   |
| EDARADD      | 0.403311465                            | N                                            | 0                                      | N                                   |



| Gene symbols | FDR (differential expression analysis) | Differentially expressed gene? Y, Yes; N, No | Number of insulin related publications | Insulin related gene? Y, Yes; N, No |
|--------------|----------------------------------------|----------------------------------------------|----------------------------------------|-------------------------------------|
| HNRNPA1P16   | 0.403311465                            | N                                            | 0                                      | N                                   |
| ING1         | 0.403311465                            | N                                            | 2                                      | N                                   |
| LCP2         | 0.403311465                            | N                                            | 0                                      | N                                   |
| NORAD        | 0.403311465                            | N                                            | 0                                      | N                                   |
| PRKY         | 0.403311465                            | N                                            | 1                                      | N                                   |
| REP15        | 0.403311465                            | N                                            | 0                                      | N                                   |
| THOC5        | 0.403311465                            | N                                            | 0                                      | N                                   |
| XBP1         | 0.403311465                            | N                                            | 150                                    | Y                                   |
| RGS5         | 0.40333145                             | N                                            | 5                                      | N                                   |
| LARP1BP1     | 0.403385394                            | N                                            | 0                                      | N                                   |
| HMG2P4       | 0.40363716                             | N                                            | 0                                      | N                                   |
| AC092809.3   | 0.404161909                            | N                                            | 0                                      | N                                   |
| ATAD2        | 0.404161909                            | N                                            | 0                                      | N                                   |
| HHIP         | 0.404161909                            | N                                            | 3                                      | N                                   |
| NAP1L1P1     | 0.404161909                            | N                                            | 0                                      | N                                   |
| PCDHGA8      | 0.404174968                            | N                                            | 0                                      | N                                   |
| MAP6         | 0.404213125                            | N                                            | 0                                      | N                                   |
| MUC22        | 0.404476146                            | N                                            | 0                                      | N                                   |
| IGF2BP2      | 0.404836917                            | N                                            | 138                                    | Y                                   |
| AC099494.3   | 0.404930396                            | N                                            | 0                                      | N                                   |
| LAMB1        | 0.404930396                            | N                                            | 3                                      | N                                   |
| PARP2        | 0.404930396                            | N                                            | 2                                      | N                                   |
| PHF5A        | 0.404930396                            | N                                            | 0                                      | N                                   |
| RN7SL559P    | 0.404930396                            | N                                            | 0                                      | N                                   |
| TNR          | 0.404930396                            | N                                            | 1                                      | N                                   |
| HIST1H2AJ    | 0.405131047                            | N                                            | 0                                      | N                                   |
| TTC16        | 0.405131047                            | N                                            | 0                                      | N                                   |
| AC008567.3   | 0.405228728                            | N                                            | 0                                      | N                                   |
| AC004232.3   | 0.405232287                            | N                                            | 0                                      | N                                   |
| AC005790.1   | 0.405232287                            | N                                            | 0                                      | N                                   |
| TRAM2        | 0.405232287                            | N                                            | 1                                      | N                                   |
| XK           | 0.405232287                            | N                                            | 3                                      | N                                   |
| AC122688.1   | 0.405454165                            | N                                            | 0                                      | N                                   |
| C18orf54     | 0.405454165                            | N                                            | 0                                      | N                                   |
| AC053527.1   | 0.405544423                            | N                                            | 0                                      | N                                   |
| KLHDC1       | 0.405544423                            | N                                            | 0                                      | N                                   |
| BZW2         | 0.405567094                            | N                                            | 0                                      | N                                   |
| PIK3CA       | 0.405567094                            | N                                            | 96                                     | N                                   |
| MRPL18       | 0.405621683                            | N                                            | 0                                      | N                                   |
| PCMTD1       | 0.405621683                            | N                                            | 0                                      | N                                   |
| PDSS1        | 0.405621683                            | N                                            | 1                                      | N                                   |
| SCN3A        | 0.405621683                            | N                                            | 2                                      | N                                   |
| GNB3         | 0.405707686                            | N                                            | 34                                     | N                                   |
| ARHGEF2      | 0.405909786                            | N                                            | 0                                      | N                                   |
| PTPN13       | 0.405909786                            | N                                            | 11                                     | N                                   |
| DYNLT3       | 0.405941108                            | N                                            | 1                                      | N                                   |
| TUBB4B       | 0.405941108                            | N                                            | 1                                      | N                                   |
| TMEM52       | 0.406125859                            | N                                            | 0                                      | N                                   |
| AL078621.3   | 0.406350399                            | N                                            | 0                                      | N                                   |
| AC022148.1   | 0.406381349                            | N                                            | 0                                      | N                                   |
| AL035456.1   | 0.406509623                            | N                                            | 0                                      | N                                   |
| ARRDC2       | 0.406538662                            | N                                            | 0                                      | N                                   |
| KDM4B        | 0.406538662                            | N                                            | 3                                      | N                                   |
| RNF41        | 0.406538662                            | N                                            | 6                                      | N                                   |
| AZIN1-AS1    | 0.406879702                            | N                                            | 0                                      | N                                   |
| MIR219A2     | 0.406879702                            | N                                            | 0                                      | N                                   |
| NUCKS1       | 0.406879702                            | N                                            | 3                                      | N                                   |
| RBPJP7       | 0.406879702                            | N                                            | 0                                      | N                                   |
| CASC4        | 0.407523337                            | N                                            | 0                                      | N                                   |
| CTDSPL2      | 0.407523337                            | N                                            | 0                                      | N                                   |
| PTMAP5       | 0.407523337                            | N                                            | 0                                      | N                                   |
| SLC7A11-AS1  | 0.407523337                            | N                                            | 0                                      | N                                   |
| EIF4E2P2     | 0.407733854                            | N                                            | 0                                      | N                                   |
| AC104759.1   | 0.40776021                             | N                                            | 0                                      | N                                   |
| AC010173.1   | 0.407773305                            | N                                            | 0                                      | N                                   |
| SEMA4B       | 0.407773305                            | N                                            | 0                                      | N                                   |

| Gene symbols | FDR (differential expression analysis) | Differentially expressed gene? Y, Yes; N, No | Number of insulin related publications | Insulin related gene? Y, Yes; N, No |
|--------------|----------------------------------------|----------------------------------------------|----------------------------------------|-------------------------------------|
| RNF8         | 0.407794028                            | N                                            | 0                                      | N                                   |
| AC120024.1   | 0.408062078                            | N                                            | 0                                      | N                                   |
| AC139149.1   | 0.408062078                            | N                                            | 0                                      | N                                   |
| C3orf80      | 0.408062078                            | N                                            | 0                                      | N                                   |
| ENPP5        | 0.408062078                            | N                                            | 1                                      | N                                   |
| EPHA10       | 0.408062078                            | N                                            | 0                                      | N                                   |
| FOXO6        | 0.408062078                            | N                                            | 19                                     | N                                   |
| GBF1         | 0.408062078                            | N                                            | 2                                      | N                                   |
| NPAP1        | 0.408062078                            | N                                            | 0                                      | N                                   |
| ZNF708       | 0.408062078                            | N                                            | 0                                      | N                                   |
| AC112719.2   | 0.408134652                            | N                                            | 0                                      | N                                   |
| CLDN4        | 0.408134652                            | N                                            | 2                                      | N                                   |
| ARHGEF26-AS1 | 0.408203156                            | N                                            | 0                                      | N                                   |
| RIPOR3       | 0.408203156                            | N                                            | 0                                      | N                                   |
| SEC31B       | 0.408203156                            | N                                            | 0                                      | N                                   |
| SYTL5        | 0.408203156                            | N                                            | 0                                      | N                                   |
| TMEM86A      | 0.408203156                            | N                                            | 0                                      | N                                   |
| FCRLA        | 0.408204614                            | N                                            | 0                                      | N                                   |
| LIMA1        | 0.408410567                            | N                                            | 1                                      | N                                   |
| NADK2        | 0.408410567                            | N                                            | 0                                      | N                                   |
| OPTN         | 0.408410567                            | N                                            | 4                                      | N                                   |
| AC012146.1   | 0.40856445                             | N                                            | 0                                      | N                                   |
| AC048380.2   | 0.40856445                             | N                                            | 0                                      | N                                   |
| AC239868.2   | 0.40856445                             | N                                            | 0                                      | N                                   |
| AGGF1P1      | 0.40856445                             | N                                            | 0                                      | N                                   |
| ANKFY1       | 0.40856445                             | N                                            | 1                                      | N                                   |
| EMC8         | 0.40856445                             | N                                            | 0                                      | N                                   |
| OR10A3       | 0.40856445                             | N                                            | 0                                      | N                                   |
| OSER1        | 0.40856445                             | N                                            | 0                                      | N                                   |
| PCDHA11      | 0.40856445                             | N                                            | 0                                      | N                                   |
| PPP1R8P1     | 0.40856445                             | N                                            | 0                                      | N                                   |
| RARS2        | 0.40856445                             | N                                            | 0                                      | N                                   |
| RGS19        | 0.40856445                             | N                                            | 1                                      | N                                   |
| AC010980.1   | 0.40874295                             | N                                            | 0                                      | N                                   |
| AC024337.2   | 0.40874295                             | N                                            | 0                                      | N                                   |
| SLC15A4      | 0.40874295                             | N                                            | 2                                      | N                                   |
| ZNF396       | 0.40874295                             | N                                            | 0                                      | N                                   |
| RAB29        | 0.408793453                            | N                                            | 0                                      | N                                   |
| AC008066.1   | 0.408798131                            | N                                            | 0                                      | N                                   |
| ACTG1P14     | 0.408798131                            | N                                            | 0                                      | N                                   |
| GOLGA8M      | 0.408798131                            | N                                            | 0                                      | N                                   |
| LINC00514    | 0.408798131                            | N                                            | 0                                      | N                                   |
| PBLD         | 0.408798131                            | N                                            | 1                                      | N                                   |
| SMC3         | 0.408798131                            | N                                            | 5                                      | N                                   |
| AC099550.1   | 0.408842537                            | N                                            | 0                                      | N                                   |
| HS3ST4       | 0.408842537                            | N                                            | 0                                      | N                                   |
| SLC5A3       | 0.408842537                            | N                                            | 4                                      | N                                   |
| UBXN7        | 0.40884528                             | N                                            | 0                                      | N                                   |
| EBF2         | 0.40914116                             | N                                            | 5                                      | N                                   |
| PDE1A        | 0.409201153                            | N                                            | 2                                      | N                                   |
| AL137918.1   | 0.409233397                            | N                                            | 0                                      | N                                   |
| AL121723.1   | 0.40923599                             | N                                            | 0                                      | N                                   |
| AC109460.2   | 0.409300463                            | N                                            | 0                                      | N                                   |
| AP006545.1   | 0.409300463                            | N                                            | 0                                      | N                                   |
| C7orf31      | 0.409300463                            | N                                            | 0                                      | N                                   |
| CCDC138      | 0.409300463                            | N                                            | 0                                      | N                                   |
| CDK11A       | 0.409300463                            | N                                            | 1                                      | N                                   |
| DYRK4        | 0.409300463                            | N                                            | 0                                      | N                                   |
| LINC01118    | 0.409300463                            | N                                            | 0                                      | N                                   |
| NOXRED1      | 0.409300463                            | N                                            | 0                                      | N                                   |
| WDR54        | 0.409300463                            | N                                            | 0                                      | N                                   |
| AC103957.2   | 0.409410557                            | N                                            | 0                                      | N                                   |
| JMJD7        | 0.409410557                            | N                                            | 0                                      | N                                   |
| AC139795.2   | 0.40993185                             | N                                            | 0                                      | N                                   |
| AL121950.1   | 0.410089052                            | N                                            | 0                                      | N                                   |
| AP001350.2   | 0.410089052                            | N                                            | 0                                      | N                                   |

| Gene symbols   | FDR (differential expression analysis) | Differentially expressed gene? Y, Yes; N, No | Number of insulin related publications | Insulin related gene? Y, Yes; N, No |
|----------------|----------------------------------------|----------------------------------------------|----------------------------------------|-------------------------------------|
| LINC01615      | 0.410089052                            | N                                            | 0                                      | N                                   |
| EMC3-AS1       | 0.41034064                             | N                                            | 0                                      | N                                   |
| LMF1-AS1       | 0.410460737                            | N                                            | 0                                      | N                                   |
| GINS3          | 0.410719561                            | N                                            | 1                                      | N                                   |
| CDH1           | 0.41071997                             | N                                            | 39                                     | N                                   |
| AL162386.2     | 0.410781852                            | N                                            | 0                                      | N                                   |
| AC134682.1     | 0.410945761                            | N                                            | 0                                      | N                                   |
| GABPB2         | 0.410945761                            | N                                            | 0                                      | N                                   |
| CIQL1          | 0.41103155                             | N                                            | 0                                      | N                                   |
| ADAMTS8        | 0.411169371                            | N                                            | 1                                      | N                                   |
| GGH            | 0.411169371                            | N                                            | 2                                      | N                                   |
| LPP            | 0.411169371                            | N                                            | 21                                     | N                                   |
| SKIL           | 0.411169371                            | N                                            | 1                                      | N                                   |
| SPAST          | 0.411180882                            | N                                            | 0                                      | N                                   |
| ADH5P4         | 0.411240342                            | N                                            | 0                                      | N                                   |
| DENND4C        | 0.411347123                            | N                                            | 2                                      | N                                   |
| GSTA4          | 0.411347123                            | N                                            | 9                                      | N                                   |
| RP11-364B6.2   | 0.411347123                            | N                                            | 0                                      | N                                   |
| SELENOH        | 0.411347123                            | N                                            | 0                                      | N                                   |
| SUMO2          | 0.411347123                            | N                                            | 5                                      | N                                   |
| PPP1R9B        | 0.411391343                            | N                                            | 0                                      | N                                   |
| HDDC2          | 0.411441908                            | N                                            | 0                                      | N                                   |
| LINC02001      | 0.411441908                            | N                                            | 0                                      | N                                   |
| POLA1          | 0.411441908                            | N                                            | 0                                      | N                                   |
| MSANTD3-TMEFF1 | 0.411511168                            | N                                            | 0                                      | N                                   |
| COA4           | 0.411587247                            | N                                            | 0                                      | N                                   |
| SNAP25-AS1     | 0.411587247                            | N                                            | 0                                      | N                                   |
| FRA10AC1       | 0.411893439                            | N                                            | 0                                      | N                                   |
| AC104695.3     | 0.411957181                            | N                                            | 0                                      | N                                   |
| AC245748.2     | 0.411957181                            | N                                            | 0                                      | N                                   |
| APC            | 0.411957181                            | N                                            | 255                                    | Y                                   |
| ARL15          | 0.411957181                            | N                                            | 12                                     | N                                   |
| COPZ2          | 0.411957181                            | N                                            | 1                                      | N                                   |
| HMG1P38        | 0.411957181                            | N                                            | 0                                      | N                                   |
| LINC01359      | 0.411957181                            | N                                            | 0                                      | N                                   |
| YPEL5P2        | 0.411957181                            | N                                            | 0                                      | N                                   |
| PGAM5          | 0.411974788                            | N                                            | 0                                      | N                                   |
| LINC01168      | 0.412090653                            | N                                            | 0                                      | N                                   |
| NEAT1          | 0.412090653                            | N                                            | 7                                      | N                                   |
| ZNF30          | 0.412090653                            | N                                            | 0                                      | N                                   |
| AC012358.2     | 0.412226543                            | N                                            | 0                                      | N                                   |
| CEP57L1P1      | 0.412226543                            | N                                            | 0                                      | N                                   |
| OGFOD1P1       | 0.412226543                            | N                                            | 0                                      | N                                   |
| ZNF613         | 0.412226543                            | N                                            | 0                                      | N                                   |
| PEG3           | 0.412815077                            | N                                            | 39                                     | N                                   |
| SEPT11         | 0.412909289                            | N                                            | 1                                      | N                                   |
| SMC1A          | 0.413046309                            | N                                            | 1                                      | N                                   |
| PCGF1          | 0.413145421                            | N                                            | 1                                      | N                                   |
| AC021752.1     | 0.413266732                            | N                                            | 0                                      | N                                   |
| AC046185.3     | 0.413266732                            | N                                            | 0                                      | N                                   |
| AC244197.3     | 0.413266732                            | N                                            | 0                                      | N                                   |
| DYNLL1         | 0.413266732                            | N                                            | 2                                      | N                                   |
| NAP1L2         | 0.413266732                            | N                                            | 0                                      | N                                   |
| PXN-AS1        | 0.413266732                            | N                                            | 0                                      | N                                   |
| SMPD4          | 0.413266732                            | N                                            | 0                                      | N                                   |
| TUBBP1         | 0.413266732                            | N                                            | 0                                      | N                                   |
| WRB            | 0.413266732                            | N                                            | 2                                      | N                                   |
| CDC27          | 0.413414795                            | N                                            | 1                                      | N                                   |
| TMED6          | 0.413414795                            | N                                            | 2                                      | N                                   |
| AL163051.1     | 0.413415652                            | N                                            | 0                                      | N                                   |
| FAM57B         | 0.413415652                            | N                                            | 0                                      | N                                   |
| MSH5           | 0.413415652                            | N                                            | 1                                      | N                                   |
| HMG2           | 0.413458638                            | N                                            | 3                                      | N                                   |
| PPT2-EGFL8     | 0.413458638                            | N                                            | 0                                      | N                                   |
| AC092933.1     | 0.413470919                            | N                                            | 0                                      | N                                   |
| LINC00847      | 0.413485626                            | N                                            | 0                                      | N                                   |

| Gene symbols | FDR (differential expression analysis) | Differentially expressed gene? Y, Yes; N, No | Number of insulin related publications | Insulin related gene? Y, Yes; N, No |
|--------------|----------------------------------------|----------------------------------------------|----------------------------------------|-------------------------------------|
| AL807757.2   | 0.413494682                            | N                                            | 0                                      | N                                   |
| ASAP1        | 0.413494682                            | N                                            | 0                                      | N                                   |
| KIAA1217     | 0.413494682                            | N                                            | 0                                      | N                                   |
| PSMF1        | 0.413494682                            | N                                            | 0                                      | N                                   |
| AC010201.2   | 0.413803265                            | N                                            | 0                                      | N                                   |
| ADORA2B      | 0.413803265                            | N                                            | 3                                      | N                                   |
| RIN2         | 0.413954148                            | N                                            | 1                                      | N                                   |
| AC131159.2   | 0.414011533                            | N                                            | 0                                      | N                                   |
| SERINC1      | 0.414011533                            | N                                            | 0                                      | N                                   |
| WDHD1        | 0.414070205                            | N                                            | 0                                      | N                                   |
| YLPM1        | 0.414070205                            | N                                            | 0                                      | N                                   |
| CCT2         | 0.414534072                            | N                                            | 2                                      | N                                   |
| RPL5P4       | 0.414534072                            | N                                            | 0                                      | N                                   |
| BORCS8       | 0.414553454                            | N                                            | 0                                      | N                                   |
| CEL          | 0.414553454                            | N                                            | 70                                     | N                                   |
| HMBOX1       | 0.414553454                            | N                                            | 0                                      | N                                   |
| KCNQ1OT1     | 0.414553454                            | N                                            | 33                                     | N                                   |
| LINC01795    | 0.414553454                            | N                                            | 0                                      | N                                   |
| MARF1        | 0.414553454                            | N                                            | 0                                      | N                                   |
| POLR3K       | 0.414553454                            | N                                            | 0                                      | N                                   |
| PTPN7        | 0.414553454                            | N                                            | 0                                      | N                                   |
| ESCO1        | 0.414622063                            | N                                            | 0                                      | N                                   |
| NUCKS1P1     | 0.414622063                            | N                                            | 0                                      | N                                   |
| AC091563.1   | 0.414638436                            | N                                            | 0                                      | N                                   |
| ATP13A3      | 0.414855236                            | N                                            | 0                                      | N                                   |
| FAM120AOS    | 0.414855236                            | N                                            | 0                                      | N                                   |
| TSC22D1      | 0.414855236                            | N                                            | 1                                      | N                                   |
| PPIC         | 0.414934323                            | N                                            | 2                                      | N                                   |
| PGGHG        | 0.414936732                            | N                                            | 0                                      | N                                   |
| TNPO1        | 0.414936732                            | N                                            | 1                                      | N                                   |
| CTA-929C8.9  | 0.415060838                            | N                                            | 0                                      | N                                   |
| PTGFR        | 0.415060838                            | N                                            | 3                                      | N                                   |
| ZNF154       | 0.415060838                            | N                                            | 1                                      | N                                   |
| CCDC62       | 0.415196239                            | N                                            | 0                                      | N                                   |
| MIR100HG     | 0.415196239                            | N                                            | 0                                      | N                                   |
| RPL26L1      | 0.415196239                            | N                                            | 0                                      | N                                   |
| PAQR5        | 0.41521323                             | N                                            | 1                                      | N                                   |
| POLR2G       | 0.41521323                             | N                                            | 0                                      | N                                   |
| PPP1R3D      | 0.41521323                             | N                                            | 0                                      | N                                   |
| PSMB6        | 0.41521323                             | N                                            | 2                                      | N                                   |
| EEF1A1P5     | 0.415291628                            | N                                            | 0                                      | N                                   |
| LINC01910    | 0.415298984                            | N                                            | 0                                      | N                                   |
| OR11A1       | 0.415298984                            | N                                            | 0                                      | N                                   |
| SHBG         | 0.415339583                            | N                                            | 1000                                   | Y                                   |
| ADGRL4       | 0.415448651                            | N                                            | 0                                      | N                                   |
| CDC26        | 0.415448651                            | N                                            | 0                                      | N                                   |
| CEP78        | 0.415448651                            | N                                            | 0                                      | N                                   |
| DCHS2        | 0.415448651                            | N                                            | 0                                      | N                                   |
| RAPH1        | 0.415448651                            | N                                            | 1                                      | N                                   |
| RNU2-6P      | 0.415448651                            | N                                            | 0                                      | N                                   |
| SNRPA        | 0.415448651                            | N                                            | 0                                      | N                                   |
| ZNF561-AS1   | 0.415448651                            | N                                            | 0                                      | N                                   |
| HS2ST1       | 0.415691203                            | N                                            | 0                                      | N                                   |
| NDRG3        | 0.415691203                            | N                                            | 0                                      | N                                   |
| SYNJ1        | 0.415846639                            | N                                            | 0                                      | N                                   |
| AP001992.1   | 0.415953661                            | N                                            | 0                                      | N                                   |
| C14orf80     | 0.416115054                            | N                                            | 0                                      | N                                   |
| C18orf32     | 0.416115054                            | N                                            | 0                                      | N                                   |
| LINC00261    | 0.416115054                            | N                                            | 0                                      | N                                   |
| MDP1         | 0.416115054                            | N                                            | 0                                      | N                                   |
| NFE2L2       | 0.416115054                            | N                                            | 204                                    | Y                                   |
| PGBD4        | 0.416115054                            | N                                            | 0                                      | N                                   |
| RAB30-AS1    | 0.416115054                            | N                                            | 0                                      | N                                   |
| SNAI2        | 0.416115054                            | N                                            | 10                                     | N                                   |
| YBX2         | 0.416115054                            | N                                            | 0                                      | N                                   |
| ZSCAN16      | 0.416115054                            | N                                            | 0                                      | N                                   |

| Gene symbols | FDR (differential expression analysis) | Differentially expressed gene? Y, Yes; N, No | Number of insulin related publications | Insulin related gene? Y, Yes; N, No |
|--------------|----------------------------------------|----------------------------------------------|----------------------------------------|-------------------------------------|
| CDC73        | 0.416468677                            | N                                            | 1                                      | N                                   |
| DNAJB1P1     | 0.416468677                            | N                                            | 0                                      | N                                   |
| LIN54        | 0.416468677                            | N                                            | 0                                      | N                                   |
| PSD2         | 0.416468677                            | N                                            | 0                                      | N                                   |
| AC009041.2   | 0.416541193                            | N                                            | 0                                      | N                                   |
| AC013400.1   | 0.416654583                            | N                                            | 0                                      | N                                   |
| AC087283.1   | 0.416654583                            | N                                            | 0                                      | N                                   |
| AC092279.1   | 0.416654583                            | N                                            | 0                                      | N                                   |
| ASPHD2       | 0.416654583                            | N                                            | 0                                      | N                                   |
| CITED2       | 0.416654583                            | N                                            | 10                                     | N                                   |
| DUSP22       | 0.416654583                            | N                                            | 0                                      | N                                   |
| KNOP1        | 0.416654583                            | N                                            | 0                                      | N                                   |
| LINC00907    | 0.416654583                            | N                                            | 0                                      | N                                   |
| LRRK2        | 0.416654583                            | N                                            | 5                                      | N                                   |
| MCM2         | 0.416654583                            | N                                            | 8                                      | N                                   |
| MED12        | 0.416654583                            | N                                            | 8                                      | N                                   |
| PIGU         | 0.416654583                            | N                                            | 0                                      | N                                   |
| PPM1A        | 0.416654583                            | N                                            | 6                                      | N                                   |
| SAPCD1       | 0.416654583                            | N                                            | 0                                      | N                                   |
| STAB1        | 0.416654583                            | N                                            | 3                                      | N                                   |
| Z99916.3     | 0.416654583                            | N                                            | 0                                      | N                                   |
| ZNF660       | 0.416654583                            | N                                            | 0                                      | N                                   |
| ZNF689       | 0.416654583                            | N                                            | 0                                      | N                                   |
| PSMA7        | 0.416754827                            | N                                            | 0                                      | N                                   |
| AP000907.1   | 0.416830813                            | N                                            | 0                                      | N                                   |
| GLYCTK       | 0.416830813                            | N                                            | 0                                      | N                                   |
| LYVE1        | 0.416830813                            | N                                            | 7                                      | N                                   |
| PPIAL4G      | 0.416830813                            | N                                            | 0                                      | N                                   |
| LRR1         | 0.416919924                            | N                                            | 0                                      | N                                   |
| NMT2         | 0.416976165                            | N                                            | 2                                      | N                                   |
| AC009945.1   | 0.417199187                            | N                                            | 0                                      | N                                   |
| CNNM1        | 0.417199187                            | N                                            | 0                                      | N                                   |
| MET          | 0.417199187                            | N                                            | 1000                                   | Y                                   |
| SGPP2        | 0.417199187                            | N                                            | 2                                      | N                                   |
| TUBGCP5      | 0.417199187                            | N                                            | 1                                      | N                                   |
| AL390205.1   | 0.417222054                            | N                                            | 0                                      | N                                   |
| UHRF2        | 0.417285443                            | N                                            | 0                                      | N                                   |
| RPL3P6       | 0.417690531                            | N                                            | 0                                      | N                                   |
| MMP14        | 0.41769634                             | N                                            | 16                                     | N                                   |
| AP002981.1   | 0.417714017                            | N                                            | 0                                      | N                                   |
| CHAF1A       | 0.417714017                            | N                                            | 0                                      | N                                   |
| DAPK2        | 0.417714017                            | N                                            | 16                                     | N                                   |
| RAB30        | 0.417714017                            | N                                            | 0                                      | N                                   |
| RPL27        | 0.417714017                            | N                                            | 0                                      | N                                   |
| TIMM22       | 0.417714017                            | N                                            | 0                                      | N                                   |
| UHRF2P1      | 0.417714725                            | N                                            | 0                                      | N                                   |
| WDR60        | 0.417714725                            | N                                            | 0                                      | N                                   |
| MYEF2        | 0.417736563                            | N                                            | 0                                      | N                                   |
| ARHGAP31     | 0.417824607                            | N                                            | 1                                      | N                                   |
| ASB1         | 0.417824607                            | N                                            | 0                                      | N                                   |
| HTN1         | 0.417824607                            | N                                            | 0                                      | N                                   |
| STUM         | 0.417824607                            | N                                            | 1                                      | N                                   |
| AC104457.1   | 0.417867637                            | N                                            | 0                                      | N                                   |
| CCDC167      | 0.417886631                            | N                                            | 0                                      | N                                   |
| AC079298.3   | 0.41907055                             | N                                            | 0                                      | N                                   |
| HOOK3        | 0.419075046                            | N                                            | 0                                      | N                                   |
| AC017071.1   | 0.419122342                            | N                                            | 0                                      | N                                   |
| AC108062.1   | 0.419122342                            | N                                            | 0                                      | N                                   |
| AC117382.1   | 0.419122342                            | N                                            | 0                                      | N                                   |
| AL035461.2   | 0.419122342                            | N                                            | 0                                      | N                                   |
| ANXA2P1      | 0.419122342                            | N                                            | 0                                      | N                                   |
| C2orf49      | 0.419122342                            | N                                            | 0                                      | N                                   |
| DISC1        | 0.419122342                            | N                                            | 2                                      | N                                   |
| EBNA1BP2     | 0.419122342                            | N                                            | 0                                      | N                                   |
| EP300        | 0.419122342                            | N                                            | 25                                     | N                                   |
| HIST1H3A     | 0.419122342                            | N                                            | 0                                      | N                                   |

| Gene symbols    | FDR (differential expression analysis) | Differentially expressed gene? Y, Yes; N, No | Number of insulin related publications | Insulin related gene? Y, Yes; N, No |
|-----------------|----------------------------------------|----------------------------------------------|----------------------------------------|-------------------------------------|
| SEC22B          | 0.419122342                            | N                                            | 2                                      | N                                   |
| SEPHS1P6        | 0.419122342                            | N                                            | 0                                      | N                                   |
| SIPA1           | 0.419122342                            | N                                            | 0                                      | N                                   |
| SYCE2           | 0.419122342                            | N                                            | 0                                      | N                                   |
| TARID           | 0.419122342                            | N                                            | 0                                      | N                                   |
| YTHDC2          | 0.419122342                            | N                                            | 0                                      | N                                   |
| AC007952.5      | 0.41930311                             | N                                            | 0                                      | N                                   |
| AL158063.1      | 0.41930311                             | N                                            | 0                                      | N                                   |
| CSPG5           | 0.41930311                             | N                                            | 0                                      | N                                   |
| GPR88           | 0.41930311                             | N                                            | 1                                      | N                                   |
| GTF2H1          | 0.41930311                             | N                                            | 10                                     | N                                   |
| KMT2A           | 0.41930311                             | N                                            | 7                                      | N                                   |
| SENP1           | 0.41930311                             | N                                            | 12                                     | N                                   |
| TOR1AIP1        | 0.41930311                             | N                                            | 0                                      | N                                   |
| ZBED6CL         | 0.41930311                             | N                                            | 0                                      | N                                   |
| ZBTB1           | 0.41930311                             | N                                            | 0                                      | N                                   |
| GABPB1          | 0.419796996                            | N                                            | 0                                      | N                                   |
| EHBP1           | 0.420068786                            | N                                            | 3                                      | N                                   |
| PIP4K2C         | 0.420068786                            | N                                            | 1                                      | N                                   |
| KIAA1211        | 0.420302471                            | N                                            | 0                                      | N                                   |
| AC092656.1      | 0.420413503                            | N                                            | 0                                      | N                                   |
| CYP1B1-AS1      | 0.420413503                            | N                                            | 0                                      | N                                   |
| PIGH            | 0.420413503                            | N                                            | 0                                      | N                                   |
| RMND5A          | 0.420413503                            | N                                            | 0                                      | N                                   |
| THSD4-AS1       | 0.420413503                            | N                                            | 0                                      | N                                   |
| Z97206.1        | 0.420413503                            | N                                            | 0                                      | N                                   |
| ZNF578          | 0.420413503                            | N                                            | 0                                      | N                                   |
| RNPS1P1         | 0.420581004                            | N                                            | 0                                      | N                                   |
| PAPPA2          | 0.420828574                            | N                                            | 36                                     | N                                   |
| ZFHX2-AS1       | 0.421118029                            | N                                            | 0                                      | N                                   |
| LIMD1           | 0.421184388                            | N                                            | 0                                      | N                                   |
| MYO19           | 0.421184388                            | N                                            | 0                                      | N                                   |
| SND1            | 0.421184388                            | N                                            | 4                                      | N                                   |
| AC024475.2      | 0.421365385                            | N                                            | 0                                      | N                                   |
| AC245884.11     | 0.421365385                            | N                                            | 0                                      | N                                   |
| AC008267.1      | 0.421422784                            | N                                            | 0                                      | N                                   |
| AC008569.2      | 0.421422784                            | N                                            | 0                                      | N                                   |
| AC073869.1      | 0.421422784                            | N                                            | 0                                      | N                                   |
| AL157938.3      | 0.421422784                            | N                                            | 0                                      | N                                   |
| HSD17B12        | 0.421422784                            | N                                            | 0                                      | N                                   |
| LINC01547       | 0.421422784                            | N                                            | 0                                      | N                                   |
| LINC01551       | 0.421422784                            | N                                            | 0                                      | N                                   |
| MT2P1           | 0.421422784                            | N                                            | 0                                      | N                                   |
| RBM17P4         | 0.421422784                            | N                                            | 0                                      | N                                   |
| SYPL1P2         | 0.421422784                            | N                                            | 0                                      | N                                   |
| TMC1            | 0.421422784                            | N                                            | 0                                      | N                                   |
| AC000078.1      | 0.421531341                            | N                                            | 0                                      | N                                   |
| DHRS4L2         | 0.421531341                            | N                                            | 0                                      | N                                   |
| CASKIN1         | 0.421623967                            | N                                            | 0                                      | N                                   |
| AC091544.2      | 0.421853034                            | N                                            | 0                                      | N                                   |
| FAM131B         | 0.421853034                            | N                                            | 0                                      | N                                   |
| AC093525.9      | 0.421889016                            | N                                            | 0                                      | N                                   |
| RPL39           | 0.422063778                            | N                                            | 0                                      | N                                   |
| AL109917.1      | 0.422280679                            | N                                            | 0                                      | N                                   |
| DDB2            | 0.422655009                            | N                                            | 3                                      | N                                   |
| GLB1L3          | 0.42289157                             | N                                            | 0                                      | N                                   |
| IDH3B           | 0.42289157                             | N                                            | 0                                      | N                                   |
| RBM18           | 0.42289157                             | N                                            | 0                                      | N                                   |
| ANKHD1-EIF4EBP3 | 0.423235657                            | N                                            | 0                                      | N                                   |
| ANKRD36B        | 0.423235657                            | N                                            | 0                                      | N                                   |
| APPBP2          | 0.423235657                            | N                                            | 0                                      | N                                   |
| DAP3P2          | 0.423235657                            | N                                            | 0                                      | N                                   |
| DHX15           | 0.423235657                            | N                                            | 1                                      | N                                   |
| ERCC6L2         | 0.423235657                            | N                                            | 0                                      | N                                   |
| GALNT11         | 0.423235657                            | N                                            | 0                                      | N                                   |
| KIAA0355        | 0.423235657                            | N                                            | 0                                      | N                                   |

| Gene symbols | FDR (differential expression analysis) | Differentially expressed gene? Y, Yes; N, No | Number of insulin related publications | Insulin related gene? Y, Yes; N, No |
|--------------|----------------------------------------|----------------------------------------------|----------------------------------------|-------------------------------------|
| MOXD1        | 0.423235657                            | N                                            | 1                                      | N                                   |
| PLIN4        | 0.423235657                            | N                                            | 10                                     | N                                   |
| QRICH1       | 0.423235657                            | N                                            | 0                                      | N                                   |
| SNORA20      | 0.423235657                            | N                                            | 0                                      | N                                   |
| SPIN3        | 0.423235657                            | N                                            | 0                                      | N                                   |
| SREBF2       | 0.423235657                            | N                                            | 88                                     | N                                   |
| TLR1         | 0.423235657                            | N                                            | 16                                     | N                                   |
| TSC22D1-AS1  | 0.423235657                            | N                                            | 0                                      | N                                   |
| MFAP3        | 0.423348248                            | N                                            | 0                                      | N                                   |
| NXPE3        | 0.423389018                            | N                                            | 0                                      | N                                   |
| AP001148.1   | 0.423481617                            | N                                            | 0                                      | N                                   |
| PDE6A        | 0.423481617                            | N                                            | 0                                      | N                                   |
| COL15A1      | 0.423528822                            | N                                            | 0                                      | N                                   |
| UBE2E1       | 0.423528822                            | N                                            | 0                                      | N                                   |
| MDM1         | 0.423592177                            | N                                            | 0                                      | N                                   |
| KCNA1        | 0.424412563                            | N                                            | 2                                      | N                                   |
| YBX1         | 0.424496131                            | N                                            | 13                                     | N                                   |
| HSPD1P11     | 0.424631539                            | N                                            | 0                                      | N                                   |
| AC016876.2   | 0.424654224                            | N                                            | 0                                      | N                                   |
| IFITM1       | 0.424654224                            | N                                            | 2                                      | N                                   |
| IFITM2       | 0.424654224                            | N                                            | 2                                      | N                                   |
| PKP1         | 0.424654224                            | N                                            | 0                                      | N                                   |
| VWA5A        | 0.424654224                            | N                                            | 0                                      | N                                   |
| AC009283.1   | 0.424674382                            | N                                            | 0                                      | N                                   |
| PDRG1        | 0.424827067                            | N                                            | 0                                      | N                                   |
| AC110769.1   | 0.424937635                            | N                                            | 0                                      | N                                   |
| AC124312.4   | 0.424937635                            | N                                            | 0                                      | N                                   |
| HSP90AA1     | 0.424937635                            | N                                            | 3                                      | N                                   |
| OTOA         | 0.424937635                            | N                                            | 0                                      | N                                   |
| RPL12        | 0.424937635                            | N                                            | 0                                      | N                                   |
| AC037459.3   | 0.425046664                            | N                                            | 0                                      | N                                   |
| AP003392.4   | 0.425046664                            | N                                            | 0                                      | N                                   |
| CD302        | 0.425046664                            | N                                            | 2                                      | N                                   |
| MMP13        | 0.425046664                            | N                                            | 38                                     | N                                   |
| PEPD         | 0.425046664                            | N                                            | 4                                      | N                                   |
| UNC5B        | 0.425046664                            | N                                            | 4                                      | N                                   |
| ZFX          | 0.425046664                            | N                                            | 0                                      | N                                   |
| AC008522.1   | 0.425318401                            | N                                            | 0                                      | N                                   |
| AC012358.1   | 0.425318401                            | N                                            | 0                                      | N                                   |
| C2orf88      | 0.425318401                            | N                                            | 0                                      | N                                   |
| CATSPERE     | 0.425318401                            | N                                            | 0                                      | N                                   |
| CRLF3        | 0.425318401                            | N                                            | 0                                      | N                                   |
| NFKBIA       | 0.425318401                            | N                                            | 103                                    | Y                                   |
| PAXIP1       | 0.425318401                            | N                                            | 1                                      | N                                   |
| SRSF6        | 0.425318401                            | N                                            | 3                                      | N                                   |
| XRCC2        | 0.425318401                            | N                                            | 0                                      | N                                   |
| TFAM         | 0.425368244                            | N                                            | 118                                    | Y                                   |
| AC008770.1   | 0.425375979                            | N                                            | 0                                      | N                                   |
| AL136454.1   | 0.425419688                            | N                                            | 0                                      | N                                   |
| WIPF2        | 0.425419688                            | N                                            | 0                                      | N                                   |
| HAUS1        | 0.425473891                            | N                                            | 0                                      | N                                   |
| GMNN         | 0.425605829                            | N                                            | 0                                      | N                                   |
| KCNMB4       | 0.425605829                            | N                                            | 1                                      | N                                   |
| MINOS1P3     | 0.425605829                            | N                                            | 0                                      | N                                   |
| UBE2F        | 0.425668119                            | N                                            | 1                                      | N                                   |
| AC117402.1   | 0.425772619                            | N                                            | 0                                      | N                                   |
| CD3G         | 0.425833975                            | N                                            | 1                                      | N                                   |
| CLCN2        | 0.425833975                            | N                                            | 0                                      | N                                   |
| MT2A         | 0.425833975                            | N                                            | 3                                      | N                                   |
| MYBL2        | 0.425833975                            | N                                            | 8                                      | N                                   |
| SPATA4       | 0.425833975                            | N                                            | 0                                      | N                                   |
| VPS53        | 0.425833975                            | N                                            | 0                                      | N                                   |
| FAM86B1      | 0.425847613                            | N                                            | 0                                      | N                                   |
| TUBA1A       | 0.425930354                            | N                                            | 0                                      | N                                   |
| HSFX1        | 0.426012277                            | N                                            | 0                                      | N                                   |
| KANSL2       | 0.42606109                             | N                                            | 0                                      | N                                   |

| Gene symbols | FDR (differential expression analysis) | Differentially expressed gene? Y, Yes; N, No | Number of insulin related publications | Insulin related gene? Y, Yes; N, No |
|--------------|----------------------------------------|----------------------------------------------|----------------------------------------|-------------------------------------|
| AL445437.1   | 0.426213016                            | N                                            | 0                                      | N                                   |
| HPS5         | 0.426213016                            | N                                            | 1                                      | N                                   |
| PTMAP2       | 0.426213016                            | N                                            | 0                                      | N                                   |
| ABHD3        | 0.426802225                            | N                                            | 0                                      | N                                   |
| AC006557.5   | 0.426802225                            | N                                            | 0                                      | N                                   |
| AC009171.2   | 0.426802225                            | N                                            | 0                                      | N                                   |
| ANKRD13C     | 0.426802225                            | N                                            | 0                                      | N                                   |
| CDV3         | 0.426802225                            | N                                            | 0                                      | N                                   |
| CHPF2        | 0.426802225                            | N                                            | 0                                      | N                                   |
| HAL          | 0.426802225                            | N                                            | 14                                     | N                                   |
| LINC00704    | 0.426802225                            | N                                            | 0                                      | N                                   |
| LINC01730    | 0.426802225                            | N                                            | 0                                      | N                                   |
| RNF216P1     | 0.426802225                            | N                                            | 0                                      | N                                   |
| SAP30        | 0.426802225                            | N                                            | 0                                      | N                                   |
| TMEM17       | 0.426802225                            | N                                            | 0                                      | N                                   |
| USP33        | 0.426802225                            | N                                            | 0                                      | N                                   |
| AL157902.2   | 0.426805552                            | N                                            | 0                                      | N                                   |
| CAPN10-AS1   | 0.427122059                            | N                                            | 0                                      | N                                   |
| KREMEN1      | 0.427136219                            | N                                            | 0                                      | N                                   |
| FOXP1-IT1    | 0.427397206                            | N                                            | 0                                      | N                                   |
| LINC01537    | 0.427531331                            | N                                            | 0                                      | N                                   |
| SALL4        | 0.427531331                            | N                                            | 6                                      | N                                   |
| UTP14C       | 0.427531331                            | N                                            | 0                                      | N                                   |
| FAM149B1P1   | 0.427581432                            | N                                            | 0                                      | N                                   |
| DNAJC9-AS1   | 0.427594601                            | N                                            | 0                                      | N                                   |
| MPP2         | 0.427655211                            | N                                            | 1                                      | N                                   |
| PRELID1P1    | 0.427678992                            | N                                            | 0                                      | N                                   |
| RANBP6       | 0.427678992                            | N                                            | 0                                      | N                                   |
| AC020915.2   | 0.427691957                            | N                                            | 0                                      | N                                   |
| CPEB3        | 0.427859676                            | N                                            | 0                                      | N                                   |
| LNCSRLR      | 0.427859676                            | N                                            | 0                                      | N                                   |
| PTGES        | 0.427859676                            | N                                            | 12                                     | N                                   |
| AC087392.1   | 0.428160049                            | N                                            | 0                                      | N                                   |
| ARNTL2       | 0.428160049                            | N                                            | 4                                      | N                                   |
| CARD10       | 0.428160049                            | N                                            | 1                                      | N                                   |
| CHCHD3P3     | 0.428160049                            | N                                            | 0                                      | N                                   |
| CPE          | 0.428160049                            | N                                            | 93                                     | N                                   |
| EMC1         | 0.428160049                            | N                                            | 0                                      | N                                   |
| ING5         | 0.428160049                            | N                                            | 0                                      | N                                   |
| JPT1         | 0.428160049                            | N                                            | 0                                      | N                                   |
| KRCC1        | 0.428160049                            | N                                            | 0                                      | N                                   |
| LINC-PINT    | 0.428160049                            | N                                            | 0                                      | N                                   |
| STX17        | 0.428160049                            | N                                            | 1                                      | N                                   |
| CDCA4        | 0.428244436                            | N                                            | 0                                      | N                                   |
| TRANK1       | 0.428244436                            | N                                            | 0                                      | N                                   |
| GPBAR1       | 0.428297891                            | N                                            | 63                                     | N                                   |
| NT5M         | 0.428297891                            | N                                            | 0                                      | N                                   |
| PPCS         | 0.428297891                            | N                                            | 19                                     | N                                   |
| S100A2       | 0.428297891                            | N                                            | 3                                      | N                                   |
| AC137932.2   | 0.428584914                            | N                                            | 0                                      | N                                   |
| ST3GAL5      | 0.428848044                            | N                                            | 2                                      | N                                   |
| CLVS2        | 0.429344012                            | N                                            | 0                                      | N                                   |
| CTCF         | 0.429344012                            | N                                            | 165                                    | Y                                   |
| CYB561       | 0.429344012                            | N                                            | 0                                      | N                                   |
| GUSB         | 0.429344012                            | N                                            | 4                                      | N                                   |
| MKI67        | 0.429344012                            | N                                            | 290                                    | Y                                   |
| SMAD2        | 0.429344012                            | N                                            | 154                                    | Y                                   |
| ZNF426       | 0.429656311                            | N                                            | 0                                      | N                                   |
| ELAC1        | 0.429665249                            | N                                            | 0                                      | N                                   |
| DIAPH2       | 0.43014147                             | N                                            | 0                                      | N                                   |
| AC234775.3   | 0.430318599                            | N                                            | 0                                      | N                                   |
| EZH2P1       | 0.431127113                            | N                                            | 0                                      | N                                   |
| AP006259.1   | 0.431129429                            | N                                            | 0                                      | N                                   |
| EEA1         | 0.431129429                            | N                                            | 21                                     | N                                   |
| HHLA1        | 0.431129429                            | N                                            | 0                                      | N                                   |
| AC008537.3   | 0.431321857                            | N                                            | 0                                      | N                                   |



| Gene symbols | FDR (differential expression analysis) | Differentially expressed gene? Y, Yes; N, No | Number of insulin related publications | Insulin related gene? Y, Yes; N, No |
|--------------|----------------------------------------|----------------------------------------------|----------------------------------------|-------------------------------------|
| NOD2         | 0.431321857                            | N                                            | 29                                     | N                                   |
| LPCAT3       | 0.431497622                            | N                                            | 2                                      | N                                   |
| AC064850.1   | 0.431503018                            | N                                            | 0                                      | N                                   |
| AC239868.3   | 0.431503018                            | N                                            | 0                                      | N                                   |
| LYAR         | 0.431503018                            | N                                            | 0                                      | N                                   |
| STAU1        | 0.431503018                            | N                                            | 3                                      | N                                   |
| AL023284.2   | 0.431778244                            | N                                            | 0                                      | N                                   |
| C1orf74      | 0.431808659                            | N                                            | 0                                      | N                                   |
| HACD2        | 0.431808659                            | N                                            | 1                                      | N                                   |
| ZNF140       | 0.431812133                            | N                                            | 0                                      | N                                   |
| TMEFF2       | 0.431961102                            | N                                            | 1                                      | N                                   |
| AL133373.2   | 0.432093159                            | N                                            | 0                                      | N                                   |
| CIR1P2       | 0.432093159                            | N                                            | 0                                      | N                                   |
| FRG1JP       | 0.432093159                            | N                                            | 0                                      | N                                   |
| POMZP3       | 0.432093159                            | N                                            | 0                                      | N                                   |
| TPI1         | 0.432093159                            | N                                            | 4                                      | N                                   |
| NLRP3        | 0.432161548                            | N                                            | 244                                    | Y                                   |
| KDM6A        | 0.432465561                            | N                                            | 3                                      | N                                   |
| TM2D3        | 0.432488107                            | N                                            | 0                                      | N                                   |
| ENPP6        | 0.432648603                            | N                                            | 1                                      | N                                   |
| AC104447.1   | 0.432704594                            | N                                            | 0                                      | N                                   |
| AMY2B        | 0.432704594                            | N                                            | 1                                      | N                                   |
| ANKZF1       | 0.432704594                            | N                                            | 0                                      | N                                   |
| COLEC10      | 0.432704594                            | N                                            | 0                                      | N                                   |
| HIF3A        | 0.432704594                            | N                                            | 8                                      | N                                   |
| CYP2U1       | 0.433023753                            | N                                            | 1                                      | N                                   |
| IL13RA1      | 0.43329968                             | N                                            | 8                                      | N                                   |
| KIAA1109     | 0.43329968                             | N                                            | 1                                      | N                                   |
| VEPH1        | 0.43329968                             | N                                            | 1                                      | N                                   |
| ZNF506       | 0.43329968                             | N                                            | 0                                      | N                                   |
| NXT1         | 0.433569395                            | N                                            | 0                                      | N                                   |
| RFX8         | 0.433569395                            | N                                            | 0                                      | N                                   |
| TFG          | 0.433784941                            | N                                            | 14                                     | N                                   |
| FAM96B       | 0.433799101                            | N                                            | 0                                      | N                                   |
| RBAK         | 0.433799101                            | N                                            | 0                                      | N                                   |
| THAP3        | 0.433799101                            | N                                            | 0                                      | N                                   |
| SDR42E1      | 0.433817874                            | N                                            | 0                                      | N                                   |
| DNAH14       | 0.433900475                            | N                                            | 0                                      | N                                   |
| INO80C       | 0.433928194                            | N                                            | 0                                      | N                                   |
| PSMD10P1     | 0.434079296                            | N                                            | 0                                      | N                                   |
| ITPKB        | 0.43414354                             | N                                            | 2                                      | N                                   |
| ZNF616       | 0.43414354                             | N                                            | 0                                      | N                                   |
| ZNF835       | 0.43414354                             | N                                            | 0                                      | N                                   |
| AC097639.1   | 0.434162417                            | N                                            | 0                                      | N                                   |
| CALCOCO2     | 0.434162417                            | N                                            | 1                                      | N                                   |
| GNAQP1       | 0.434162417                            | N                                            | 0                                      | N                                   |
| LONP2        | 0.434162417                            | N                                            | 0                                      | N                                   |
| TNPO1P3      | 0.434162417                            | N                                            | 0                                      | N                                   |
| ZFPM1        | 0.434162417                            | N                                            | 1                                      | N                                   |
| AC243562.3   | 0.43449483                             | N                                            | 0                                      | N                                   |
| APP          | 0.434789945                            | N                                            | 514                                    | Y                                   |
| HMGB1P6      | 0.434789945                            | N                                            | 0                                      | N                                   |
| PLG          | 0.434789945                            | N                                            | 35                                     | N                                   |
| TRMT2B       | 0.434789945                            | N                                            | 0                                      | N                                   |
| AC073073.2   | 0.435023966                            | N                                            | 0                                      | N                                   |
| KCNJ14       | 0.435023966                            | N                                            | 0                                      | N                                   |
| LSM3         | 0.435023966                            | N                                            | 0                                      | N                                   |
| SFI1         | 0.435023966                            | N                                            | 1                                      | N                                   |
| ZNF157       | 0.435023966                            | N                                            | 0                                      | N                                   |
| AC239868.4   | 0.435037452                            | N                                            | 0                                      | N                                   |
| CCDC116      | 0.435037452                            | N                                            | 1                                      | N                                   |
| AL121894.2   | 0.435106824                            | N                                            | 0                                      | N                                   |
| SLCO1A2      | 0.435487103                            | N                                            | 0                                      | N                                   |
| SOWAHA       | 0.435487103                            | N                                            | 0                                      | N                                   |
| AC068790.2   | 0.435682188                            | N                                            | 0                                      | N                                   |
| SCAMP2       | 0.435682188                            | N                                            | 1                                      | N                                   |

| Gene symbols | FDR (differential expression analysis) | Differentially expressed gene? Y, Yes; N, No | Number of insulin related publications | Insulin related gene? Y, Yes; N, No |
|--------------|----------------------------------------|----------------------------------------------|----------------------------------------|-------------------------------------|
| GALNT17      | 0.43601521                             | N                                            | 0                                      | N                                   |
| AL627308.2   | 0.436124579                            | N                                            | 0                                      | N                                   |
| WDR97        | 0.436128761                            | N                                            | 0                                      | N                                   |
| YWHAG        | 0.436128761                            | N                                            | 3                                      | N                                   |
| AC010186.3   | 0.436174208                            | N                                            | 0                                      | N                                   |
| COQ10A       | 0.436174208                            | N                                            | 0                                      | N                                   |
| EFCAB14P1    | 0.436174208                            | N                                            | 0                                      | N                                   |
| FBXO43       | 0.436174208                            | N                                            | 0                                      | N                                   |
| GUSBP1       | 0.436174208                            | N                                            | 0                                      | N                                   |
| HKR1         | 0.436174208                            | N                                            | 0                                      | N                                   |
| LHX2         | 0.436174208                            | N                                            | 5                                      | N                                   |
| PCDH11Y      | 0.436174208                            | N                                            | 0                                      | N                                   |
| THOC6        | 0.436174208                            | N                                            | 1                                      | N                                   |
| NPIP14P      | 0.436329368                            | N                                            | 0                                      | N                                   |
| BLCAP        | 0.436333232                            | N                                            | 2                                      | N                                   |
| GLYR1        | 0.436333232                            | N                                            | 0                                      | N                                   |
| MRPS28       | 0.436421457                            | N                                            | 0                                      | N                                   |
| RP9          | 0.436443905                            | N                                            | 0                                      | N                                   |
| STAG1        | 0.436454422                            | N                                            | 1                                      | N                                   |
| HNRNPF       | 0.436763931                            | N                                            | 2                                      | N                                   |
| EXTL3        | 0.436948178                            | N                                            | 2                                      | N                                   |
| KLHL31       | 0.437082923                            | N                                            | 1                                      | N                                   |
| RBM14-RBM4   | 0.437082923                            | N                                            | 0                                      | N                                   |
| ZNF185       | 0.437082923                            | N                                            | 0                                      | N                                   |
| AC026470.1   | 0.437119698                            | N                                            | 0                                      | N                                   |
| RP1-169K13.3 | 0.437176649                            | N                                            | 0                                      | N                                   |
| SRRT         | 0.437211869                            | N                                            | 2                                      | N                                   |
| ZNF780A      | 0.437211869                            | N                                            | 0                                      | N                                   |
| TRIQQ        | 0.437484514                            | N                                            | 0                                      | N                                   |
| AC105105.4   | 0.437560263                            | N                                            | 0                                      | N                                   |
| CBWD3        | 0.437560263                            | N                                            | 0                                      | N                                   |
| DHRS7        | 0.437560263                            | N                                            | 0                                      | N                                   |
| EPS15        | 0.437560263                            | N                                            | 13                                     | N                                   |
| NAB2         | 0.437560263                            | N                                            | 4                                      | N                                   |
| PATJ         | 0.437560263                            | N                                            | 1                                      | N                                   |
| PLCB4        | 0.437837154                            | N                                            | 3                                      | N                                   |
| HPF1         | 0.438096494                            | N                                            | 0                                      | N                                   |
| TP73-AS1     | 0.438284944                            | N                                            | 0                                      | N                                   |
| MRPS31P4     | 0.438407416                            | N                                            | 0                                      | N                                   |
| RNF165       | 0.438407416                            | N                                            | 0                                      | N                                   |
| RTN3         | 0.438407416                            | N                                            | 1                                      | N                                   |
| SYTL4        | 0.438407416                            | N                                            | 28                                     | N                                   |
| SMOC1        | 0.438462982                            | N                                            | 1                                      | N                                   |
| TESPA1       | 0.438462982                            | N                                            | 0                                      | N                                   |
| RBMX         | 0.438469345                            | N                                            | 0                                      | N                                   |
| FAM96A       | 0.438538537                            | N                                            | 0                                      | N                                   |
| COL5A2       | 0.438687725                            | N                                            | 3                                      | N                                   |
| CDC42EP4     | 0.438878546                            | N                                            | 0                                      | N                                   |
| CCT7P2       | 0.439205466                            | N                                            | 0                                      | N                                   |
| GTF2IRD1     | 0.439205466                            | N                                            | 1                                      | N                                   |
| SNHG1        | 0.439205466                            | N                                            | 2                                      | N                                   |
| AC007066.2   | 0.439339528                            | N                                            | 0                                      | N                                   |
| MTHFD2P1     | 0.439339528                            | N                                            | 0                                      | N                                   |
| AC005476.2   | 0.439459275                            | N                                            | 0                                      | N                                   |
| GLT8D1       | 0.439495222                            | N                                            | 0                                      | N                                   |
| AC124944.1   | 0.439861242                            | N                                            | 0                                      | N                                   |
| AK6P2        | 0.439861242                            | N                                            | 0                                      | N                                   |
| AL359263.1   | 0.439861242                            | N                                            | 0                                      | N                                   |
| LINC00476    | 0.439861242                            | N                                            | 0                                      | N                                   |
| RALGPS1      | 0.439861242                            | N                                            | 0                                      | N                                   |
| TMEM54       | 0.439861242                            | N                                            | 0                                      | N                                   |
| PPP1R8       | 0.440136178                            | N                                            | 1                                      | N                                   |
| AC012066.1   | 0.440284216                            | N                                            | 0                                      | N                                   |
| ATAD3C       | 0.44044632                             | N                                            | 0                                      | N                                   |
| HS3ST2       | 0.44044632                             | N                                            | 0                                      | N                                   |
| AC090971.4   | 0.440807983                            | N                                            | 0                                      | N                                   |

| Gene symbols | FDR (differential expression analysis) | Differentially expressed gene? Y, Yes; N, No | Number of insulin related publications | Insulin related gene? Y, Yes; N, No |
|--------------|----------------------------------------|----------------------------------------------|----------------------------------------|-------------------------------------|
| BCCIP        | 0.440807983                            | N                                            | 0                                      | N                                   |
| MAP3K2       | 0.440807983                            | N                                            | 1                                      | N                                   |
| TTC4P1       | 0.440807983                            | N                                            | 0                                      | N                                   |
| AC092326.1   | 0.440962126                            | N                                            | 0                                      | N                                   |
| AL603756.1   | 0.440962126                            | N                                            | 0                                      | N                                   |
| ATP5B        | 0.440962126                            | N                                            | 9                                      | N                                   |
| CD2BP2       | 0.440962126                            | N                                            | 0                                      | N                                   |
| FIBIN        | 0.440962126                            | N                                            | 1                                      | N                                   |
| HIST1H2AB    | 0.440962126                            | N                                            | 0                                      | N                                   |
| IKZF5        | 0.440962126                            | N                                            | 0                                      | N                                   |
| KREMEN2      | 0.440962126                            | N                                            | 0                                      | N                                   |
| MRPL13       | 0.440962126                            | N                                            | 0                                      | N                                   |
| PRKCQ        | 0.440962126                            | N                                            | 74                                     | N                                   |
| QKI          | 0.440962126                            | N                                            | 1                                      | N                                   |
| RBBP8        | 0.440962126                            | N                                            | 0                                      | N                                   |
| REPS1        | 0.440962126                            | N                                            | 0                                      | N                                   |
| TRPC3        | 0.440962126                            | N                                            | 12                                     | N                                   |
| ZNF577       | 0.441189858                            | N                                            | 0                                      | N                                   |
| AC004448.1   | 0.441193525                            | N                                            | 0                                      | N                                   |
| AL049697.1   | 0.441270433                            | N                                            | 0                                      | N                                   |
| FAM216A      | 0.441478935                            | N                                            | 0                                      | N                                   |
| LINC01667    | 0.441478935                            | N                                            | 0                                      | N                                   |
| NONO         | 0.441478935                            | N                                            | 8                                      | N                                   |
| MTPN         | 0.441944372                            | N                                            | 9                                      | N                                   |
| MRE11        | 0.441985531                            | N                                            | 2                                      | N                                   |
| SMPD5        | 0.441985531                            | N                                            | 0                                      | N                                   |
| AL121761.1   | 0.442223698                            | N                                            | 0                                      | N                                   |
| AL592494.2   | 0.442223698                            | N                                            | 0                                      | N                                   |
| ANKRD46      | 0.442223698                            | N                                            | 0                                      | N                                   |
| MIR646HG     | 0.442280838                            | N                                            | 0                                      | N                                   |
| BBS7         | 0.442292806                            | N                                            | 0                                      | N                                   |
| GBP2         | 0.442292806                            | N                                            | 3                                      | N                                   |
| IL20RB       | 0.442407196                            | N                                            | 0                                      | N                                   |
| LINC00310    | 0.442534587                            | N                                            | 0                                      | N                                   |
| PCDHA9       | 0.442534587                            | N                                            | 0                                      | N                                   |
| PCYOX1       | 0.442534587                            | N                                            | 1                                      | N                                   |
| RPA2P2       | 0.442534587                            | N                                            | 0                                      | N                                   |
| SOX4         | 0.442534587                            | N                                            | 11                                     | N                                   |
| AC068790.3   | 0.442675587                            | N                                            | 0                                      | N                                   |
| AC080023.1   | 0.442675587                            | N                                            | 0                                      | N                                   |
| AC127070.5   | 0.442675587                            | N                                            | 0                                      | N                                   |
| AC139099.1   | 0.442675587                            | N                                            | 0                                      | N                                   |
| AF117829.1   | 0.442675587                            | N                                            | 0                                      | N                                   |
| AKT3         | 0.442675587                            | N                                            | 78                                     | N                                   |
| AP002414.2   | 0.442675587                            | N                                            | 0                                      | N                                   |
| ARHGEF9      | 0.442675587                            | N                                            | 0                                      | N                                   |
| CCDC7        | 0.442675587                            | N                                            | 0                                      | N                                   |
| CRIM1        | 0.442675587                            | N                                            | 2                                      | N                                   |
| DFFA         | 0.442675587                            | N                                            | 11                                     | N                                   |
| DHRS1        | 0.442675587                            | N                                            | 0                                      | N                                   |
| EVC          | 0.442675587                            | N                                            | 3                                      | N                                   |
| FCHO1        | 0.442675587                            | N                                            | 0                                      | N                                   |
| GABRR3       | 0.442675587                            | N                                            | 0                                      | N                                   |
| GALE         | 0.442675587                            | N                                            | 185                                    | Y                                   |
| HERC5        | 0.442675587                            | N                                            | 0                                      | N                                   |
| HM13-IT1     | 0.442675587                            | N                                            | 0                                      | N                                   |
| JRK          | 0.442675587                            | N                                            | 2                                      | N                                   |
| LAT          | 0.442675587                            | N                                            | 759                                    | Y                                   |
| MAD2L1BP     | 0.442675587                            | N                                            | 1                                      | N                                   |
| MORN1        | 0.442675587                            | N                                            | 1                                      | N                                   |
| MT1P3        | 0.442675587                            | N                                            | 0                                      | N                                   |
| NDUFAF4P2    | 0.442675587                            | N                                            | 0                                      | N                                   |
| NFKBID       | 0.442675587                            | N                                            | 0                                      | N                                   |
| PCDHA3       | 0.442675587                            | N                                            | 0                                      | N                                   |
| PID1         | 0.442675587                            | N                                            | 22                                     | N                                   |
| PRPF4        | 0.442675587                            | N                                            | 0                                      | N                                   |

| Gene symbols | FDR (differential expression analysis) | Differentially expressed gene? Y, Yes; N, No | Number of insulin related publications | Insulin related gene? Y, Yes; N, No |
|--------------|----------------------------------------|----------------------------------------------|----------------------------------------|-------------------------------------|
| REXO2        | 0.442675587                            | N                                            | 0                                      | N                                   |
| RMDN2-AS1    | 0.442675587                            | N                                            | 0                                      | N                                   |
| SDF2L1       | 0.442675587                            | N                                            | 2                                      | N                                   |
| SETBP1       | 0.442675587                            | N                                            | 0                                      | N                                   |
| SH3D21       | 0.442675587                            | N                                            | 0                                      | N                                   |
| TMEM198B     | 0.442675587                            | N                                            | 0                                      | N                                   |
| WDR82P1      | 0.442675587                            | N                                            | 0                                      | N                                   |
| ZNF587B      | 0.442675587                            | N                                            | 0                                      | N                                   |
| FAM71E1      | 0.442848875                            | N                                            | 0                                      | N                                   |
| ANKRD42      | 0.443137246                            | N                                            | 0                                      | N                                   |
| NFATC2IP     | 0.443137246                            | N                                            | 0                                      | N                                   |
| OPRL1        | 0.443137246                            | N                                            | 0                                      | N                                   |
| RNU12        | 0.443137246                            | N                                            | 0                                      | N                                   |
| AC010973.2   | 0.443293459                            | N                                            | 0                                      | N                                   |
| AC012409.3   | 0.443361843                            | N                                            | 0                                      | N                                   |
| AL354890.1   | 0.443361843                            | N                                            | 0                                      | N                                   |
| AL928654.5   | 0.443361843                            | N                                            | 0                                      | N                                   |
| ATP8A1       | 0.443361843                            | N                                            | 0                                      | N                                   |
| CALML4       | 0.443361843                            | N                                            | 2                                      | N                                   |
| CCT6P2       | 0.443361843                            | N                                            | 0                                      | N                                   |
| CSTF2T       | 0.443361843                            | N                                            | 0                                      | N                                   |
| EMP2         | 0.443361843                            | N                                            | 0                                      | N                                   |
| HMGA1P1      | 0.443361843                            | N                                            | 0                                      | N                                   |
| NOSIP        | 0.443361843                            | N                                            | 0                                      | N                                   |
| NUP50        | 0.443361843                            | N                                            | 1                                      | N                                   |
| PRC1-AS1     | 0.443361843                            | N                                            | 0                                      | N                                   |
| SCP2         | 0.443361843                            | N                                            | 4                                      | N                                   |
| SEMA3C       | 0.443361843                            | N                                            | 1                                      | N                                   |
| SRPK1        | 0.443361843                            | N                                            | 3                                      | N                                   |
| TRMT112P6    | 0.443361843                            | N                                            | 0                                      | N                                   |
| ZNF223       | 0.443361843                            | N                                            | 0                                      | N                                   |
| ZSCAN25      | 0.443361843                            | N                                            | 0                                      | N                                   |
| AC006449.6   | 0.443416179                            | N                                            | 0                                      | N                                   |
| AC009549.1   | 0.443416179                            | N                                            | 0                                      | N                                   |
| DDR1         | 0.443416179                            | N                                            | 16                                     | N                                   |
| HCST         | 0.443416179                            | N                                            | 1                                      | N                                   |
| L3MBTL4-AS1  | 0.443416179                            | N                                            | 0                                      | N                                   |
| PA2G4        | 0.443416179                            | N                                            | 2                                      | N                                   |
| STXBP5       | 0.443416179                            | N                                            | 8                                      | N                                   |
| GNL2P1       | 0.443490842                            | N                                            | 0                                      | N                                   |
| SVILP1       | 0.443541644                            | N                                            | 0                                      | N                                   |
| AC008514.1   | 0.443676619                            | N                                            | 0                                      | N                                   |
| AC016724.1   | 0.443681832                            | N                                            | 0                                      | N                                   |
| TBC1D12      | 0.443681832                            | N                                            | 0                                      | N                                   |
| AC006077.2   | 0.443691484                            | N                                            | 0                                      | N                                   |
| AP000889.1   | 0.443691484                            | N                                            | 0                                      | N                                   |
| ITFG1        | 0.443691484                            | N                                            | 0                                      | N                                   |
| KDM5A        | 0.443691484                            | N                                            | 2                                      | N                                   |
| TLN1         | 0.443691484                            | N                                            | 1                                      | N                                   |
| AC018470.1   | 0.444083591                            | N                                            | 0                                      | N                                   |
| RAD54B       | 0.444212965                            | N                                            | 0                                      | N                                   |
| ANKS1A       | 0.444275152                            | N                                            | 0                                      | N                                   |
| PCDHB5       | 0.444275152                            | N                                            | 0                                      | N                                   |
| RBFOX2       | 0.444275152                            | N                                            | 1                                      | N                                   |
| BNIP1        | 0.444315494                            | N                                            | 0                                      | N                                   |
| COX17P1      | 0.444315494                            | N                                            | 0                                      | N                                   |
| MED19        | 0.444315494                            | N                                            | 0                                      | N                                   |
| PDCL3        | 0.444315494                            | N                                            | 1                                      | N                                   |
| RRP7A        | 0.444315494                            | N                                            | 0                                      | N                                   |
| SLC9B1       | 0.444315494                            | N                                            | 0                                      | N                                   |
| ZNF784       | 0.444341202                            | N                                            | 0                                      | N                                   |
| KLF8         | 0.44449689                             | N                                            | 1                                      | N                                   |
| AC067931.2   | 0.444674681                            | N                                            | 0                                      | N                                   |
| PNN          | 0.444683965                            | N                                            | 3                                      | N                                   |
| AC004824.2   | 0.444759748                            | N                                            | 0                                      | N                                   |
| AC017081.1   | 0.444759748                            | N                                            | 0                                      | N                                   |

| Gene symbols | FDR (differential expression analysis) | Differentially expressed gene? Y, Yes; N, No | Number of insulin related publications | Insulin related gene? Y, Yes; N, No |
|--------------|----------------------------------------|----------------------------------------------|----------------------------------------|-------------------------------------|
| AC122713.2   | 0.444759748                            | N                                            | 0                                      | N                                   |
| AHRR         | 0.444759748                            | N                                            | 3                                      | N                                   |
| BATF3        | 0.444759748                            | N                                            | 2                                      | N                                   |
| IFT52        | 0.444759748                            | N                                            | 0                                      | N                                   |
| LRWD1        | 0.444759748                            | N                                            | 0                                      | N                                   |
| SF3B3        | 0.444759748                            | N                                            | 0                                      | N                                   |
| AC092111.2   | 0.444781217                            | N                                            | 0                                      | N                                   |
| AL355488.1   | 0.444781217                            | N                                            | 0                                      | N                                   |
| DNAH10OS     | 0.444781217                            | N                                            | 0                                      | N                                   |
| DOK3         | 0.444781217                            | N                                            | 2                                      | N                                   |
| NUP160       | 0.444781217                            | N                                            | 0                                      | N                                   |
| PRKRIP1      | 0.444781217                            | N                                            | 0                                      | N                                   |
| RBL1         | 0.444781217                            | N                                            | 3                                      | N                                   |
| HSP90B1      | 0.445080157                            | N                                            | 4                                      | N                                   |
| PJA2         | 0.445144065                            | N                                            | 2                                      | N                                   |
| ADAR         | 0.445204916                            | N                                            | 15                                     | N                                   |
| CCT4         | 0.445240191                            | N                                            | 2                                      | N                                   |
| COL4A4       | 0.445240191                            | N                                            | 1                                      | N                                   |
| HPRT1        | 0.445240191                            | N                                            | 38                                     | N                                   |
| RETSAT       | 0.445240191                            | N                                            | 2                                      | N                                   |
| CDC7         | 0.445244431                            | N                                            | 2                                      | N                                   |
| HK2P1        | 0.445244431                            | N                                            | 1                                      | N                                   |
| NDUFA9P1     | 0.445712041                            | N                                            | 0                                      | N                                   |
| VSIG8        | 0.445743042                            | N                                            | 0                                      | N                                   |
| AL158212.3   | 0.445827019                            | N                                            | 0                                      | N                                   |
| GHITM        | 0.445827019                            | N                                            | 2                                      | N                                   |
| PROM1        | 0.446158598                            | N                                            | 41                                     | N                                   |
| HMGA1        | 0.446279804                            | N                                            | 54                                     | N                                   |
| PCF11        | 0.446279804                            | N                                            | 0                                      | N                                   |
| SNHG22       | 0.446279804                            | N                                            | 0                                      | N                                   |
| B4GALT1-AS1  | 0.446312804                            | N                                            | 1                                      | N                                   |
| APH1B        | 0.44665985                             | N                                            | 0                                      | N                                   |
| DUS3L        | 0.44665985                             | N                                            | 0                                      | N                                   |
| TSPAN6       | 0.44665985                             | N                                            | 0                                      | N                                   |
| AC067930.6   | 0.446725014                            | N                                            | 0                                      | N                                   |
| AC072062.1   | 0.446725014                            | N                                            | 0                                      | N                                   |
| AC073326.1   | 0.446725014                            | N                                            | 0                                      | N                                   |
| AC105020.6   | 0.446725014                            | N                                            | 0                                      | N                                   |
| AC105265.2   | 0.446725014                            | N                                            | 0                                      | N                                   |
| EMBP1        | 0.446725014                            | N                                            | 0                                      | N                                   |
| FHL1         | 0.446725014                            | N                                            | 4                                      | N                                   |
| LHFPL6       | 0.446725014                            | N                                            | 0                                      | N                                   |
| NIPA1        | 0.446725014                            | N                                            | 0                                      | N                                   |
| NR0B1        | 0.446725014                            | N                                            | 9                                      | N                                   |
| PLCB3        | 0.446725014                            | N                                            | 4                                      | N                                   |
| RND2         | 0.446725014                            | N                                            | 0                                      | N                                   |
| TOR1AIP2     | 0.446725014                            | N                                            | 0                                      | N                                   |
| ZBTB5        | 0.446725014                            | N                                            | 0                                      | N                                   |
| GPX3         | 0.446750083                            | N                                            | 36                                     | N                                   |
| NPR3         | 0.446750083                            | N                                            | 2                                      | N                                   |
| PRPF38B      | 0.446750083                            | N                                            | 0                                      | N                                   |
| SOX18        | 0.446750083                            | N                                            | 2                                      | N                                   |
| TMC8         | 0.446750083                            | N                                            | 0                                      | N                                   |
| TSN          | 0.446750083                            | N                                            | 8                                      | N                                   |
| OAT          | 0.446955555                            | N                                            | 191                                    | Y                                   |
| VPS26B       | 0.446955555                            | N                                            | 0                                      | N                                   |
| AC011939.1   | 0.447052215                            | N                                            | 0                                      | N                                   |
| RUVBL2       | 0.447052215                            | N                                            | 4                                      | N                                   |
| NBEAL1       | 0.447487796                            | N                                            | 0                                      | N                                   |
| SCML2        | 0.447487796                            | N                                            | 0                                      | N                                   |
| DICER1-AS1   | 0.447766615                            | N                                            | 0                                      | N                                   |
| GGACT        | 0.447821902                            | N                                            | 0                                      | N                                   |
| MTF1         | 0.447821902                            | N                                            | 2                                      | N                                   |
| PCM1         | 0.447821902                            | N                                            | 1                                      | N                                   |
| DENND5B      | 0.448361257                            | N                                            | 0                                      | N                                   |
| AC138904.1   | 0.448816827                            | N                                            | 0                                      | N                                   |

| Gene symbols | FDR (differential expression analysis) | Differentially expressed gene? Y, Yes; N, No | Number of insulin related publications | Insulin related gene? Y, Yes; N, No |
|--------------|----------------------------------------|----------------------------------------------|----------------------------------------|-------------------------------------|
| U2AF2        | 0.448901305                            | N                                            | 2                                      | N                                   |
| UNC80        | 0.448908175                            | N                                            | 0                                      | N                                   |
| NEIL2        | 0.448967965                            | N                                            | 1                                      | N                                   |
| MAP7         | 0.448990914                            | N                                            | 0                                      | N                                   |
| AC068305.2   | 0.4491457                              | N                                            | 0                                      | N                                   |
| ANAPC11      | 0.4491457                              | N                                            | 0                                      | N                                   |
| SLCO4A1      | 0.4491457                              | N                                            | 0                                      | N                                   |
| ZNF81        | 0.4491457                              | N                                            | 0                                      | N                                   |
| AC092810.1   | 0.449239443                            | N                                            | 0                                      | N                                   |
| CLTC         | 0.449239443                            | N                                            | 3                                      | N                                   |
| COL5A1       | 0.449239443                            | N                                            | 8                                      | N                                   |
| IQSEC1       | 0.449239443                            | N                                            | 1                                      | N                                   |
| SNRPC        | 0.449239443                            | N                                            | 0                                      | N                                   |
| AL133330.1   | 0.449484056                            | N                                            | 0                                      | N                                   |
| RNF139       | 0.449484056                            | N                                            | 1                                      | N                                   |
| AC016831.6   | 0.449558249                            | N                                            | 0                                      | N                                   |
| ARF3         | 0.449558249                            | N                                            | 0                                      | N                                   |
| RANP1        | 0.449558249                            | N                                            | 0                                      | N                                   |
| AC127024.6   | 0.449613129                            | N                                            | 0                                      | N                                   |
| LINC01422    | 0.449716208                            | N                                            | 0                                      | N                                   |
| DDIAS        | 0.449761791                            | N                                            | 0                                      | N                                   |
| HIST1H1B     | 0.449761791                            | N                                            | 0                                      | N                                   |
| NUP155       | 0.449761791                            | N                                            | 0                                      | N                                   |
| RICTOR       | 0.449761856                            | N                                            | 129                                    | Y                                   |
| AC007684.1   | 0.449821454                            | N                                            | 0                                      | N                                   |
| H1FX-AS1     | 0.449821454                            | N                                            | 0                                      | N                                   |
| MOSPD1       | 0.449821454                            | N                                            | 0                                      | N                                   |
| ZNF329       | 0.449821454                            | N                                            | 0                                      | N                                   |
| CDKAL1       | 0.449864213                            | N                                            | 131                                    | Y                                   |
| FAM172A      | 0.449864213                            | N                                            | 1                                      | N                                   |
| PCDHGA4      | 0.449864213                            | N                                            | 1                                      | N                                   |
| PPP1CA       | 0.449864213                            | N                                            | 0                                      | N                                   |
| PSPH         | 0.449864213                            | N                                            | 3                                      | N                                   |
| WNK1         | 0.449864213                            | N                                            | 18                                     | N                                   |
| ZNF615       | 0.449864213                            | N                                            | 0                                      | N                                   |
| PITPNM3      | 0.450028555                            | N                                            | 0                                      | N                                   |
| AC010615.1   | 0.450051146                            | N                                            | 0                                      | N                                   |
| CALCRL       | 0.450051146                            | N                                            | 1                                      | N                                   |
| CEP57L1      | 0.450051146                            | N                                            | 0                                      | N                                   |
| KLHL5        | 0.450051146                            | N                                            | 0                                      | N                                   |
| MORF4L1P1    | 0.450051146                            | N                                            | 0                                      | N                                   |
| PCNAP3       | 0.450051146                            | N                                            | 0                                      | N                                   |
| TLR5         | 0.450051146                            | N                                            | 22                                     | N                                   |
| TNC          | 0.450051146                            | N                                            | 15                                     | N                                   |
| WFIKKN1      | 0.450051146                            | N                                            | 0                                      | N                                   |
| NDUFS6       | 0.450159196                            | N                                            | 0                                      | N                                   |
| ZSCAN9       | 0.450159196                            | N                                            | 0                                      | N                                   |
| AC009120.6   | 0.450171829                            | N                                            | 0                                      | N                                   |
| FER1L4       | 0.450171829                            | N                                            | 0                                      | N                                   |
| AC092718.3   | 0.450305858                            | N                                            | 0                                      | N                                   |
| ADRB2        | 0.450305858                            | N                                            | 316                                    | Y                                   |
| ARMT1        | 0.450305858                            | N                                            | 0                                      | N                                   |
| HOPX         | 0.450305858                            | N                                            | 3                                      | N                                   |
| PIEZO2       | 0.450305858                            | N                                            | 1                                      | N                                   |
| RAD51        | 0.450305858                            | N                                            | 16                                     | N                                   |
| SNX1         | 0.450305858                            | N                                            | 4                                      | N                                   |
| SORL1        | 0.450305858                            | N                                            | 8                                      | N                                   |
| AC105383.1   | 0.450308587                            | N                                            | 0                                      | N                                   |
| BLM          | 0.450308587                            | N                                            | 48                                     | N                                   |
| LINC00547    | 0.450308587                            | N                                            | 0                                      | N                                   |
| LINC01641    | 0.450308587                            | N                                            | 0                                      | N                                   |
| PCDHGB5      | 0.450308587                            | N                                            | 0                                      | N                                   |
| SEC63        | 0.450308587                            | N                                            | 1                                      | N                                   |
| SH3YL1       | 0.450308587                            | N                                            | 0                                      | N                                   |
| TOMM22P5     | 0.450308587                            | N                                            | 0                                      | N                                   |
| AC005336.1   | 0.450652798                            | N                                            | 0                                      | N                                   |

| Gene symbols | FDR (differential expression analysis) | Differentially expressed gene? Y, Yes; N, No | Number of insulin related publications | Insulin related gene? Y, Yes; N, No |
|--------------|----------------------------------------|----------------------------------------------|----------------------------------------|-------------------------------------|
| AC027288.3   | 0.450652798                            | N                                            | 0                                      | N                                   |
| ADAL         | 0.450652798                            | N                                            | 7                                      | N                                   |
| ADCY10       | 0.450652798                            | N                                            | 1                                      | N                                   |
| CUX1         | 0.450652798                            | N                                            | 2                                      | N                                   |
| FIGNL1       | 0.450652798                            | N                                            | 1                                      | N                                   |
| GATAD1       | 0.450652798                            | N                                            | 0                                      | N                                   |
| HPSE2        | 0.450652798                            | N                                            | 0                                      | N                                   |
| KLF17        | 0.450652798                            | N                                            | 0                                      | N                                   |
| LINC02068    | 0.450652798                            | N                                            | 0                                      | N                                   |
| NTM          | 0.450652798                            | N                                            | 6                                      | N                                   |
| SHOC2        | 0.450652798                            | N                                            | 3                                      | N                                   |
| SNHG12       | 0.450652798                            | N                                            | 1                                      | N                                   |
| TRIM21       | 0.450652798                            | N                                            | 0                                      | N                                   |
| TSEN34       | 0.450652798                            | N                                            | 0                                      | N                                   |
| VLDLR        | 0.450652798                            | N                                            | 21                                     | N                                   |
| YTHDF3       | 0.450652798                            | N                                            | 0                                      | N                                   |
| SRP72        | 0.450851857                            | N                                            | 1                                      | N                                   |
| MRGBP        | 0.451071588                            | N                                            | 0                                      | N                                   |
| AP000926.4   | 0.451123268                            | N                                            | 0                                      | N                                   |
| FBXL13       | 0.451123268                            | N                                            | 0                                      | N                                   |
| ZNF512       | 0.451173162                            | N                                            | 0                                      | N                                   |
| ADA2         | 0.451259125                            | N                                            | 2                                      | N                                   |
| AC110079.2   | 0.45132707                             | N                                            | 0                                      | N                                   |
| HIST1H2BL    | 0.45132707                             | N                                            | 0                                      | N                                   |
| PCYOX1L      | 0.451445579                            | N                                            | 0                                      | N                                   |
| TMEM135      | 0.451445579                            | N                                            | 1                                      | N                                   |
| AC008280.3   | 0.451713542                            | N                                            | 0                                      | N                                   |
| NPY5R        | 0.451793857                            | N                                            | 4                                      | N                                   |
| CANT1        | 0.452057755                            | N                                            | 0                                      | N                                   |
| TPTEP1       | 0.452057755                            | N                                            | 0                                      | N                                   |
| TVP23C       | 0.452110351                            | N                                            | 0                                      | N                                   |
| MAGED2       | 0.452286523                            | N                                            | 0                                      | N                                   |
| BOLA3P3      | 0.452404423                            | N                                            | 0                                      | N                                   |
| BCL9         | 0.453000063                            | N                                            | 1                                      | N                                   |
| AC022306.3   | 0.453571991                            | N                                            | 0                                      | N                                   |
| AC022893.2   | 0.453571991                            | N                                            | 0                                      | N                                   |
| AL353616.1   | 0.453571991                            | N                                            | 0                                      | N                                   |
| AL512638.2   | 0.453571991                            | N                                            | 0                                      | N                                   |
| LINC00602    | 0.453571991                            | N                                            | 0                                      | N                                   |
| MMP1         | 0.453571991                            | N                                            | 20                                     | N                                   |
| TYRO3P       | 0.453597457                            | N                                            | 0                                      | N                                   |
| RPS15AP6     | 0.45361532                             | N                                            | 0                                      | N                                   |
| CDH10        | 0.453812449                            | N                                            | 0                                      | N                                   |
| AC005912.2   | 0.45382445                             | N                                            | 0                                      | N                                   |
| AL008718.3   | 0.45382445                             | N                                            | 0                                      | N                                   |
| ALDH3B1      | 0.45382445                             | N                                            | 0                                      | N                                   |
| C9orf40      | 0.45382445                             | N                                            | 0                                      | N                                   |
| CTSO         | 0.45382445                             | N                                            | 0                                      | N                                   |
| FAM219A      | 0.45382445                             | N                                            | 0                                      | N                                   |
| POLR2D       | 0.45382445                             | N                                            | 0                                      | N                                   |
| RPL36A       | 0.45382445                             | N                                            | 0                                      | N                                   |
| STON1        | 0.45382445                             | N                                            | 1                                      | N                                   |
| FCRL3        | 0.453955729                            | N                                            | 7                                      | N                                   |
| PTGES3L      | 0.453955729                            | N                                            | 0                                      | N                                   |
| SCARNA21     | 0.453998519                            | N                                            | 0                                      | N                                   |
| MCM3         | 0.45414749                             | N                                            | 0                                      | N                                   |
| ATAD3A       | 0.454365868                            | N                                            | 2                                      | N                                   |
| CLDND2       | 0.454365868                            | N                                            | 0                                      | N                                   |
| CTGF         | 0.454365868                            | N                                            | 197                                    | Y                                   |
| AC010422.3   | 0.454405262                            | N                                            | 0                                      | N                                   |
| CEP295       | 0.454405262                            | N                                            | 1                                      | N                                   |
| PCMTD2       | 0.454405262                            | N                                            | 0                                      | N                                   |
| NKX2-4       | 0.454543347                            | N                                            | 0                                      | N                                   |
| MRV11        | 0.454585473                            | N                                            | 0                                      | N                                   |
| PITX1        | 0.454670985                            | N                                            | 6                                      | N                                   |
| ALCAM        | 0.454737812                            | N                                            | 11                                     | N                                   |

| Gene symbols | FDR (differential expression analysis) | Differentially expressed gene? Y, Yes; N, No | Number of insulin related publications | Insulin related gene? Y, Yes; N, No |
|--------------|----------------------------------------|----------------------------------------------|----------------------------------------|-------------------------------------|
| SNRPCP2      | 0.454737812                            | N                                            | 0                                      | N                                   |
| XPOT         | 0.454737812                            | N                                            | 0                                      | N                                   |
| ABCA13       | 0.454765562                            | N                                            | 0                                      | N                                   |
| AL591034.2   | 0.454765562                            | N                                            | 0                                      | N                                   |
| BTBD6        | 0.454765562                            | N                                            | 0                                      | N                                   |
| CD24         | 0.454765562                            | N                                            | 40                                     | N                                   |
| MAST1        | 0.454765562                            | N                                            | 0                                      | N                                   |
| RPS18P9      | 0.454765562                            | N                                            | 0                                      | N                                   |
| UBE2HP1      | 0.454765562                            | N                                            | 0                                      | N                                   |
| DUS4L        | 0.454768857                            | N                                            | 0                                      | N                                   |
| TNPO1P1      | 0.454768857                            | N                                            | 0                                      | N                                   |
| Z69890.1     | 0.454768857                            | N                                            | 0                                      | N                                   |
| MATN2        | 0.454844626                            | N                                            | 2                                      | N                                   |
| LINC00504    | 0.455151864                            | N                                            | 0                                      | N                                   |
| TLCD2        | 0.455151864                            | N                                            | 0                                      | N                                   |
| AL121578.3   | 0.455235903                            | N                                            | 0                                      | N                                   |
| ARHGEF37     | 0.455235903                            | N                                            | 0                                      | N                                   |
| CWC27        | 0.455235903                            | N                                            | 0                                      | N                                   |
| DEF6         | 0.455235903                            | N                                            | 0                                      | N                                   |
| MIR22HG      | 0.455235903                            | N                                            | 0                                      | N                                   |
| SLC25A11     | 0.455235903                            | N                                            | 0                                      | N                                   |
| AC007773.1   | 0.455275984                            | N                                            | 0                                      | N                                   |
| PCID2        | 0.455321223                            | N                                            | 0                                      | N                                   |
| ZNF763       | 0.455321223                            | N                                            | 0                                      | N                                   |
| FADS1        | 0.455404893                            | N                                            | 46                                     | N                                   |
| GCNA         | 0.455404893                            | N                                            | 0                                      | N                                   |
| AF111167.2   | 0.455411494                            | N                                            | 0                                      | N                                   |
| EIF3L        | 0.455411494                            | N                                            | 0                                      | N                                   |
| LRP11        | 0.455411494                            | N                                            | 0                                      | N                                   |
| POLK         | 0.455411494                            | N                                            | 29                                     | N                                   |
| ADH6         | 0.455455832                            | N                                            | 0                                      | N                                   |
| TPBGL        | 0.455455832                            | N                                            | 0                                      | N                                   |
| TRDN         | 0.455455832                            | N                                            | 2                                      | N                                   |
| YWHAB        | 0.455455832                            | N                                            | 6                                      | N                                   |
| CALCOCO1     | 0.455516837                            | N                                            | 0                                      | N                                   |
| MBTD1        | 0.455537067                            | N                                            | 0                                      | N                                   |
| PFN4         | 0.455537067                            | N                                            | 0                                      | N                                   |
| SAT2         | 0.455537067                            | N                                            | 8                                      | N                                   |
| AP003396.5   | 0.455792643                            | N                                            | 0                                      | N                                   |
| AP4B1        | 0.455792643                            | N                                            | 0                                      | N                                   |
| CCDC126      | 0.455792643                            | N                                            | 0                                      | N                                   |
| CNOT2        | 0.455792643                            | N                                            | 0                                      | N                                   |
| CTSF         | 0.455792643                            | N                                            | 1                                      | N                                   |
| DKC1         | 0.455792643                            | N                                            | 0                                      | N                                   |
| HNRNPA2B1    | 0.455792643                            | N                                            | 4                                      | N                                   |
| NRGN         | 0.455792643                            | N                                            | 1                                      | N                                   |
| PI4KA        | 0.455792643                            | N                                            | 0                                      | N                                   |
| RPL4P2       | 0.455792643                            | N                                            | 0                                      | N                                   |
| RUFY3        | 0.455792643                            | N                                            | 0                                      | N                                   |
| TAF5L        | 0.455792643                            | N                                            | 1                                      | N                                   |
| GLIPR1L2     | 0.455844209                            | N                                            | 0                                      | N                                   |
| PPP6C        | 0.455892274                            | N                                            | 0                                      | N                                   |
| AC073896.4   | 0.455918458                            | N                                            | 0                                      | N                                   |
| BCL2         | 0.45593529                             | N                                            | 309                                    | Y                                   |
| MYOM3        | 0.45593529                             | N                                            | 0                                      | N                                   |
| LSM5         | 0.456072426                            | N                                            | 0                                      | N                                   |
| CCM2         | 0.456201712                            | N                                            | 1                                      | N                                   |
| AC027612.2   | 0.456388546                            | N                                            | 0                                      | N                                   |
| DCT          | 0.456388546                            | N                                            | 16                                     | N                                   |
| FANCB        | 0.456388546                            | N                                            | 1                                      | N                                   |
| GAL3ST3      | 0.456388546                            | N                                            | 0                                      | N                                   |
| TP53BP1      | 0.456388546                            | N                                            | 4                                      | N                                   |
| RSPH9        | 0.456403981                            | N                                            | 0                                      | N                                   |
| PRR13        | 0.456479233                            | N                                            | 1                                      | N                                   |
| AC135279.3   | 0.456493567                            | N                                            | 0                                      | N                                   |
| EEF1AKMT3    | 0.456493567                            | N                                            | 0                                      | N                                   |



| Gene symbols | FDR (differential expression analysis) | Differentially expressed gene? Y, Yes; N, No | Number of insulin related publications | Insulin related gene? Y, Yes; N, No |
|--------------|----------------------------------------|----------------------------------------------|----------------------------------------|-------------------------------------|
| RPS6KC1      | 0.456493567                            | N                                            | 1                                      | N                                   |
| CYP26B1      | 0.456493707                            | N                                            | 9                                      | N                                   |
| ASS1P1       | 0.456545023                            | N                                            | 0                                      | N                                   |
| CD58         | 0.456567865                            | N                                            | 9                                      | N                                   |
| Z84478.1     | 0.456575693                            | N                                            | 0                                      | N                                   |
| SLC44A4      | 0.456689076                            | N                                            | 0                                      | N                                   |
| AC092338.2   | 0.456749659                            | N                                            | 0                                      | N                                   |
| AKR1B1       | 0.456749659                            | N                                            | 4                                      | N                                   |
| AL669918.1   | 0.456749659                            | N                                            | 0                                      | N                                   |
| BTD          | 0.456749659                            | N                                            | 5                                      | N                                   |
| DNAJC9       | 0.456749659                            | N                                            | 0                                      | N                                   |
| ERICH3       | 0.456749659                            | N                                            | 0                                      | N                                   |
| GSDMA        | 0.456749659                            | N                                            | 0                                      | N                                   |
| L3MBTL4      | 0.456749659                            | N                                            | 1                                      | N                                   |
| PSMB3        | 0.456749659                            | N                                            | 0                                      | N                                   |
| ROBO2        | 0.456749659                            | N                                            | 3                                      | N                                   |
| RPA2         | 0.456749659                            | N                                            | 0                                      | N                                   |
| SCYL3        | 0.456749659                            | N                                            | 0                                      | N                                   |
| TMEM165      | 0.456749659                            | N                                            | 0                                      | N                                   |
| TTC8         | 0.456749659                            | N                                            | 0                                      | N                                   |
| VPS13D       | 0.456749659                            | N                                            | 0                                      | N                                   |
| AC135776.4   | 0.456782634                            | N                                            | 0                                      | N                                   |
| DPY30        | 0.456847612                            | N                                            | 1                                      | N                                   |
| GAS5         | 0.456847612                            | N                                            | 7                                      | N                                   |
| SERPINH1P1   | 0.457030818                            | N                                            | 0                                      | N                                   |
| KRTCAP3      | 0.457372045                            | N                                            | 0                                      | N                                   |
| AC139530.1   | 0.457722057                            | N                                            | 0                                      | N                                   |
| SERPINH1     | 0.457722057                            | N                                            | 3                                      | N                                   |
| TAPBP        | 0.457722057                            | N                                            | 0                                      | N                                   |
| AC009133.6   | 0.457828956                            | N                                            | 0                                      | N                                   |
| AC087311.1   | 0.457828956                            | N                                            | 0                                      | N                                   |
| ACOT13       | 0.457828956                            | N                                            | 6                                      | N                                   |
| ACOT2        | 0.457828956                            | N                                            | 1                                      | N                                   |
| ACSL6        | 0.457828956                            | N                                            | 3                                      | N                                   |
| ANKDD1A      | 0.457828956                            | N                                            | 0                                      | N                                   |
| C10orf10     | 0.457828956                            | N                                            | 1                                      | N                                   |
| CLMP         | 0.457828956                            | N                                            | 6                                      | N                                   |
| CXXC5        | 0.457828956                            | N                                            | 1                                      | N                                   |
| DHX8         | 0.457828956                            | N                                            | 0                                      | N                                   |
| DMRTA2       | 0.457828956                            | N                                            | 0                                      | N                                   |
| FCGR2B       | 0.457828956                            | N                                            | 6                                      | N                                   |
| MED21        | 0.457828956                            | N                                            | 0                                      | N                                   |
| NDRG1        | 0.457828956                            | N                                            | 9                                      | N                                   |
| PMVK         | 0.457828956                            | N                                            | 0                                      | N                                   |
| RRN3P3       | 0.457828956                            | N                                            | 0                                      | N                                   |
| SIRT7        | 0.457828956                            | N                                            | 14                                     | N                                   |
| SMOX         | 0.457828956                            | N                                            | 0                                      | N                                   |
| SNIP1        | 0.457828956                            | N                                            | 0                                      | N                                   |
| TEX30        | 0.457828956                            | N                                            | 0                                      | N                                   |
| TRIB3        | 0.457828956                            | N                                            | 92                                     | N                                   |
| VPS13A       | 0.457828956                            | N                                            | 1                                      | N                                   |
| VRK1         | 0.457828956                            | N                                            | 1                                      | N                                   |
| WHAMMP3      | 0.457828956                            | N                                            | 0                                      | N                                   |
| ZMYM3        | 0.457828956                            | N                                            | 0                                      | N                                   |
| HAT1         | 0.457831717                            | N                                            | 2                                      | N                                   |
| AL109811.3   | 0.457933881                            | N                                            | 0                                      | N                                   |
| AC000068.1   | 0.457962039                            | N                                            | 0                                      | N                                   |
| AC006378.2   | 0.457962039                            | N                                            | 0                                      | N                                   |
| AC022447.4   | 0.457962039                            | N                                            | 0                                      | N                                   |
| AC078875.1   | 0.457962039                            | N                                            | 0                                      | N                                   |
| AC093155.1   | 0.457962039                            | N                                            | 0                                      | N                                   |
| AC093157.2   | 0.457962039                            | N                                            | 0                                      | N                                   |
| AC110998.1   | 0.457962039                            | N                                            | 0                                      | N                                   |
| ATP23        | 0.457962039                            | N                                            | 0                                      | N                                   |
| BX005019.1   | 0.457962039                            | N                                            | 0                                      | N                                   |
| ELL2         | 0.457962039                            | N                                            | 0                                      | N                                   |

| Gene symbols | FDR (differential expression analysis) | Differentially expressed gene? Y, Yes; N, No | Number of insulin related publications | Insulin related gene? Y, Yes; N, No |
|--------------|----------------------------------------|----------------------------------------------|----------------------------------------|-------------------------------------|
| ELMO3        | 0.457962039                            | N                                            | 0                                      | N                                   |
| FAM117B      | 0.457962039                            | N                                            | 0                                      | N                                   |
| IKBKG        | 0.457962039                            | N                                            | 1                                      | N                                   |
| KCTD15       | 0.457962039                            | N                                            | 7                                      | N                                   |
| LARS         | 0.457962039                            | N                                            | 79                                     | N                                   |
| LCMT1-AS2    | 0.457962039                            | N                                            | 0                                      | N                                   |
| LINC01315    | 0.457962039                            | N                                            | 0                                      | N                                   |
| MTHFD1P1     | 0.457962039                            | N                                            | 0                                      | N                                   |
| MUC13        | 0.457962039                            | N                                            | 0                                      | N                                   |
| NCK1-AS1     | 0.457962039                            | N                                            | 0                                      | N                                   |
| NUP37        | 0.457962039                            | N                                            | 0                                      | N                                   |
| PALD1        | 0.457962039                            | N                                            | 1                                      | N                                   |
| PDCD4        | 0.457962039                            | N                                            | 17                                     | N                                   |
| PPP2R5E      | 0.457962039                            | N                                            | 0                                      | N                                   |
| RASGEF1A     | 0.457962039                            | N                                            | 0                                      | N                                   |
| RGS17        | 0.457962039                            | N                                            | 1                                      | N                                   |
| SIAE         | 0.457962039                            | N                                            | 0                                      | N                                   |
| SKOR2        | 0.457962039                            | N                                            | 1                                      | N                                   |
| SPIB         | 0.457962039                            | N                                            | 0                                      | N                                   |
| TMEM127      | 0.457962039                            | N                                            | 1                                      | N                                   |
| VHL          | 0.457962039                            | N                                            | 62                                     | N                                   |
| WDR90        | 0.457962039                            | N                                            | 0                                      | N                                   |
| Z82190.1     | 0.457962039                            | N                                            | 0                                      | N                                   |
| ZCCHC11      | 0.457962039                            | N                                            | 1                                      | N                                   |
| ZDHHC23      | 0.457962039                            | N                                            | 0                                      | N                                   |
| ZMYND11      | 0.457962039                            | N                                            | 1                                      | N                                   |
| ZNF221       | 0.457962039                            | N                                            | 0                                      | N                                   |
| KIAA0141     | 0.458432736                            | N                                            | 0                                      | N                                   |
| C5orf42      | 0.458514155                            | N                                            | 1                                      | N                                   |
| DDX5         | 0.458514155                            | N                                            | 2                                      | N                                   |
| MANBAL       | 0.458514155                            | N                                            | 0                                      | N                                   |
| CCT3         | 0.458528618                            | N                                            | 0                                      | N                                   |
| GULP1        | 0.458528618                            | N                                            | 2                                      | N                                   |
| OTUD6B-AS1   | 0.458528618                            | N                                            | 0                                      | N                                   |
| PCDHA10      | 0.458528618                            | N                                            | 0                                      | N                                   |
| PDCD6IP      | 0.458691077                            | N                                            | 4                                      | N                                   |
| NUP54        | 0.458799174                            | N                                            | 0                                      | N                                   |
| RTN4         | 0.458859915                            | N                                            | 1                                      | N                                   |
| AC080038.3   | 0.458987042                            | N                                            | 0                                      | N                                   |
| AC113146.2   | 0.458987042                            | N                                            | 0                                      | N                                   |
| POGZ         | 0.458987042                            | N                                            | 0                                      | N                                   |
| RIBC2        | 0.458987042                            | N                                            | 0                                      | N                                   |
| SAFB         | 0.458987042                            | N                                            | 2                                      | N                                   |
| AC093151.3   | 0.45902096                             | N                                            | 0                                      | N                                   |
| AC116913.1   | 0.45902096                             | N                                            | 0                                      | N                                   |
| BIN1         | 0.45902096                             | N                                            | 4                                      | N                                   |
| DCAF15       | 0.45902096                             | N                                            | 0                                      | N                                   |
| FOCAD        | 0.45902096                             | N                                            | 0                                      | N                                   |
| MIR133A1HG   | 0.45902096                             | N                                            | 0                                      | N                                   |
| PSEN1        | 0.45902096                             | N                                            | 49                                     | N                                   |
| SETD4        | 0.45902096                             | N                                            | 0                                      | N                                   |
| UBE2J2       | 0.45902096                             | N                                            | 0                                      | N                                   |
| VAT1         | 0.45902096                             | N                                            | 0                                      | N                                   |
| AC133540.1   | 0.459363197                            | N                                            | 0                                      | N                                   |
| AL589674.2   | 0.459390275                            | N                                            | 0                                      | N                                   |
| FMO3         | 0.459390275                            | N                                            | 13                                     | N                                   |
| RAB8A        | 0.459390275                            | N                                            | 21                                     | N                                   |
| AC008014.1   | 0.4599339                              | N                                            | 0                                      | N                                   |
| AC016586.1   | 0.4599339                              | N                                            | 0                                      | N                                   |
| CHEK1        | 0.4599339                              | N                                            | 5                                      | N                                   |
| ENO1         | 0.4599339                              | N                                            | 5                                      | N                                   |
| PLEKHG3      | 0.4599339                              | N                                            | 0                                      | N                                   |
| NFYB         | 0.460169455                            | N                                            | 0                                      | N                                   |
| NYAP1        | 0.460189067                            | N                                            | 0                                      | N                                   |
| ZNF491       | 0.460189067                            | N                                            | 0                                      | N                                   |
| SLC29A1      | 0.460293418                            | N                                            | 16                                     | N                                   |

| Gene symbols | FDR (differential expression analysis) | Differentially expressed gene? Y, Yes; N, No | Number of insulin related publications | Insulin related gene? Y, Yes; N, No |
|--------------|----------------------------------------|----------------------------------------------|----------------------------------------|-------------------------------------|
| LRRC37BP1    | 0.46048506                             | N                                            | 0                                      | N                                   |
| LINC00963    | 0.460489239                            | N                                            | 0                                      | N                                   |
| LGALS4       | 0.460576115                            | N                                            | 3                                      | N                                   |
| ING2         | 0.460611913                            | N                                            | 1                                      | N                                   |
| XKR5         | 0.460611913                            | N                                            | 0                                      | N                                   |
| ZC3H7A       | 0.460611913                            | N                                            | 0                                      | N                                   |
| DDX46        | 0.460929479                            | N                                            | 0                                      | N                                   |
| PNPLA3       | 0.460929479                            | N                                            | 166                                    | Y                                   |
| BRD7         | 0.46097335                             | N                                            | 4                                      | N                                   |
| SORD         | 0.46097335                             | N                                            | 0                                      | N                                   |
| CENPUP1      | 0.461055723                            | N                                            | 0                                      | N                                   |
| CYYR1        | 0.461180166                            | N                                            | 0                                      | N                                   |
| ERH          | 0.461180166                            | N                                            | 18                                     | N                                   |
| PEX13        | 0.461180166                            | N                                            | 0                                      | N                                   |
| RAP1GAP2     | 0.461180166                            | N                                            | 0                                      | N                                   |
| UNC13C       | 0.461180166                            | N                                            | 1                                      | N                                   |
| CTAGE5       | 0.461410239                            | N                                            | 2                                      | N                                   |
| NEK11        | 0.461486619                            | N                                            | 0                                      | N                                   |
| SHANK2-AS1   | 0.461486619                            | N                                            | 0                                      | N                                   |
| HIST1H3C     | 0.46151939                             | N                                            | 0                                      | N                                   |
| PIGB         | 0.46151939                             | N                                            | 0                                      | N                                   |
| RGS2         | 0.46151939                             | N                                            | 18                                     | N                                   |
| AC093278.2   | 0.461559521                            | N                                            | 0                                      | N                                   |
| PIWIL4       | 0.461597249                            | N                                            | 1                                      | N                                   |
| AC004812.2   | 0.461717033                            | N                                            | 0                                      | N                                   |
| AC009237.3   | 0.461717033                            | N                                            | 0                                      | N                                   |
| AC011998.1   | 0.461717033                            | N                                            | 0                                      | N                                   |
| AC104564.6   | 0.461717033                            | N                                            | 0                                      | N                                   |
| AC110792.1   | 0.461717033                            | N                                            | 0                                      | N                                   |
| AL121987.2   | 0.461717033                            | N                                            | 0                                      | N                                   |
| AL132656.3   | 0.461717033                            | N                                            | 0                                      | N                                   |
| ARSI         | 0.461717033                            | N                                            | 1                                      | N                                   |
| BX842568.2   | 0.461717033                            | N                                            | 0                                      | N                                   |
| CCAR2        | 0.461717033                            | N                                            | 4                                      | N                                   |
| COX7A2L      | 0.461717033                            | N                                            | 1                                      | N                                   |
| EIF3FP3      | 0.461717033                            | N                                            | 0                                      | N                                   |
| LIPE         | 0.461717033                            | N                                            | 35                                     | N                                   |
| LSM3P3       | 0.461717033                            | N                                            | 0                                      | N                                   |
| MED30        | 0.461717033                            | N                                            | 1                                      | N                                   |
| MFAP5        | 0.461717033                            | N                                            | 2                                      | N                                   |
| MRPL52       | 0.461717033                            | N                                            | 0                                      | N                                   |
| MTHFD2L      | 0.461717033                            | N                                            | 0                                      | N                                   |
| NOSTRIN      | 0.461717033                            | N                                            | 0                                      | N                                   |
| PNKP         | 0.461717033                            | N                                            | 0                                      | N                                   |
| POLE2        | 0.461717033                            | N                                            | 0                                      | N                                   |
| RPS16        | 0.461717033                            | N                                            | 1                                      | N                                   |
| RRM2P3       | 0.461717033                            | N                                            | 0                                      | N                                   |
| SLC29A4      | 0.461717033                            | N                                            | 2                                      | N                                   |
| U1           | 0.461717033                            | N                                            | 13                                     | N                                   |
| ZFC3H1       | 0.461717033                            | N                                            | 0                                      | N                                   |
| TOMM40       | 0.461778322                            | N                                            | 5                                      | N                                   |
| AC005005.1   | 0.461848384                            | N                                            | 0                                      | N                                   |
| AC107068.1   | 0.461848384                            | N                                            | 0                                      | N                                   |
| NFATC4       | 0.461848384                            | N                                            | 11                                     | N                                   |
| P2RX6        | 0.461848384                            | N                                            | 0                                      | N                                   |
| AC002116.2   | 0.462118047                            | N                                            | 0                                      | N                                   |
| DUSP12       | 0.462118047                            | N                                            | 3                                      | N                                   |
| TEX12        | 0.462118047                            | N                                            | 0                                      | N                                   |
| AC084036.1   | 0.462157521                            | N                                            | 0                                      | N                                   |
| AL356515.1   | 0.462157521                            | N                                            | 0                                      | N                                   |
| ARFGEF1      | 0.462157521                            | N                                            | 0                                      | N                                   |
| CDC42BPB     | 0.462157521                            | N                                            | 0                                      | N                                   |
| CTBS         | 0.462157521                            | N                                            | 2                                      | N                                   |
| DNAAF4       | 0.462157521                            | N                                            | 0                                      | N                                   |
| DNAJC8P1     | 0.462157521                            | N                                            | 0                                      | N                                   |
| EFNB1        | 0.462157521                            | N                                            | 3                                      | N                                   |

| Gene symbols | FDR (differential expression analysis) | Differentially expressed gene? Y, Yes; N, No | Number of insulin related publications | Insulin related gene? Y, Yes; N, No |
|--------------|----------------------------------------|----------------------------------------------|----------------------------------------|-------------------------------------|
| ITIH4        | 0.462157521                            | N                                            | 5                                      | N                                   |
| SBK1         | 0.462157521                            | N                                            | 0                                      | N                                   |
| SWT1         | 0.462157521                            | N                                            | 1                                      | N                                   |
| TIGD6        | 0.462157521                            | N                                            | 0                                      | N                                   |
| AC133644.2   | 0.462279751                            | N                                            | 0                                      | N                                   |
| FZR1         | 0.462326365                            | N                                            | 2                                      | N                                   |
| RN7SL531P    | 0.462326365                            | N                                            | 0                                      | N                                   |
| PUS1         | 0.462458156                            | N                                            | 1                                      | N                                   |
| LRIF1        | 0.462504516                            | N                                            | 0                                      | N                                   |
| PARP1        | 0.462504516                            | N                                            | 44                                     | N                                   |
| TPT1-AS1     | 0.462504516                            | N                                            | 0                                      | N                                   |
| PSORS1C1     | 0.462708025                            | N                                            | 0                                      | N                                   |
| SETD5        | 0.462713869                            | N                                            | 0                                      | N                                   |
| AL451165.2   | 0.462761199                            | N                                            | 0                                      | N                                   |
| AL596087.1   | 0.4627895                              | N                                            | 0                                      | N                                   |
| H6PD         | 0.4627895                              | N                                            | 10                                     | N                                   |
| OTUD4P1      | 0.46289975                             | N                                            | 0                                      | N                                   |
| RCAN3        | 0.46289975                             | N                                            | 0                                      | N                                   |
| SLC25A25     | 0.46289975                             | N                                            | 0                                      | N                                   |
| STIP1P3      | 0.46289975                             | N                                            | 0                                      | N                                   |
| TENM4        | 0.46289975                             | N                                            | 1                                      | N                                   |
| MTM1         | 0.463372027                            | N                                            | 6                                      | N                                   |
| RCC1L        | 0.46345026                             | N                                            | 0                                      | N                                   |
| CCL7         | 0.463566605                            | N                                            | 12                                     | N                                   |
| RRAGD        | 0.463568562                            | N                                            | 2                                      | N                                   |
| CEP63        | 0.463760875                            | N                                            | 0                                      | N                                   |
| AC069236.1   | 0.463898438                            | N                                            | 0                                      | N                                   |
| CENPT        | 0.463998001                            | N                                            | 1                                      | N                                   |
| LPAL2        | 0.464353754                            | N                                            | 0                                      | N                                   |
| TJP2         | 0.464353754                            | N                                            | 0                                      | N                                   |
| AC099066.2   | 0.464399093                            | N                                            | 0                                      | N                                   |
| RN7SKP70     | 0.464399093                            | N                                            | 0                                      | N                                   |
| AC079316.2   | 0.46441165                             | N                                            | 0                                      | N                                   |
| EPOR         | 0.464623515                            | N                                            | 33                                     | N                                   |
| AC092645.1   | 0.464642248                            | N                                            | 0                                      | N                                   |
| BCLAF1P2     | 0.464642248                            | N                                            | 0                                      | N                                   |
| LINC01341    | 0.464642248                            | N                                            | 0                                      | N                                   |
| AL049840.1   | 0.464657173                            | N                                            | 0                                      | N                                   |
| GAPDHP69     | 0.464657173                            | N                                            | 0                                      | N                                   |
| ST7L         | 0.464657173                            | N                                            | 0                                      | N                                   |
| SAP25        | 0.464867639                            | N                                            | 0                                      | N                                   |
| CX3CL1       | 0.464966071                            | N                                            | 46                                     | N                                   |
| HIST1H3B     | 0.464966071                            | N                                            | 0                                      | N                                   |
| PARD3        | 0.46500706                             | N                                            | 1                                      | N                                   |
| SEC62        | 0.46500706                             | N                                            | 1                                      | N                                   |
| AP3S2        | 0.465047092                            | N                                            | 4                                      | N                                   |
| AC008035.1   | 0.465092009                            | N                                            | 0                                      | N                                   |
| AL031009.1   | 0.465092009                            | N                                            | 0                                      | N                                   |
| LINC00327    | 0.465092009                            | N                                            | 0                                      | N                                   |
| RASA2        | 0.465092009                            | N                                            | 1                                      | N                                   |
| SCG2         | 0.465092009                            | N                                            | 5                                      | N                                   |
| AL162615.1   | 0.465314901                            | N                                            | 0                                      | N                                   |
| AL359924.1   | 0.465314901                            | N                                            | 0                                      | N                                   |
| AL590635.1   | 0.465314901                            | N                                            | 0                                      | N                                   |
| AP000783.1   | 0.465314901                            | N                                            | 0                                      | N                                   |
| CDH15        | 0.465314901                            | N                                            | 0                                      | N                                   |
| LINC01297    | 0.465314901                            | N                                            | 0                                      | N                                   |
| LRP5         | 0.465314901                            | N                                            | 39                                     | N                                   |
| MRC2         | 0.465314901                            | N                                            | 0                                      | N                                   |
| N4BP2L1      | 0.465314901                            | N                                            | 0                                      | N                                   |
| OLFM2        | 0.465314901                            | N                                            | 0                                      | N                                   |
| SHROOM4      | 0.465314901                            | N                                            | 0                                      | N                                   |
| SEMA3E       | 0.465418405                            | N                                            | 5                                      | N                                   |
| AC007406.5   | 0.465516526                            | N                                            | 0                                      | N                                   |
| CCDC153      | 0.465516526                            | N                                            | 0                                      | N                                   |
| AC005838.2   | 0.465537373                            | N                                            | 0                                      | N                                   |

| Gene symbols | FDR (differential expression analysis) | Differentially expressed gene? Y, Yes; N, No | Number of insulin related publications | Insulin related gene? Y, Yes; N, No |
|--------------|----------------------------------------|----------------------------------------------|----------------------------------------|-------------------------------------|
| RERG         | 0.465537373                            | N                                            | 2                                      | N                                   |
| CAPS         | 0.465830032                            | N                                            | 80                                     | N                                   |
| NPW          | 0.465908224                            | N                                            | 7                                      | N                                   |
| OSBPL8       | 0.465908224                            | N                                            | 0                                      | N                                   |
| PRRC2C       | 0.465908224                            | N                                            | 0                                      | N                                   |
| SEC14L2      | 0.465908224                            | N                                            | 0                                      | N                                   |
| SLC18B1      | 0.465908224                            | N                                            | 0                                      | N                                   |
| ZNF518B      | 0.465908224                            | N                                            | 1                                      | N                                   |
| CRTC3        | 0.46591181                             | N                                            | 5                                      | N                                   |
| AC010632.2   | 0.465964286                            | N                                            | 0                                      | N                                   |
| AL109811.4   | 0.466195376                            | N                                            | 0                                      | N                                   |
| APOBEC3B     | 0.466195376                            | N                                            | 0                                      | N                                   |
| CTSS         | 0.466195376                            | N                                            | 5                                      | N                                   |
| HEXA         | 0.466195376                            | N                                            | 26                                     | N                                   |
| IQCD         | 0.466195376                            | N                                            | 0                                      | N                                   |
| LINC00473    | 0.466195376                            | N                                            | 0                                      | N                                   |
| MED27        | 0.466195376                            | N                                            | 0                                      | N                                   |
| SUN2         | 0.466195376                            | N                                            | 1                                      | N                                   |
| TP53         | 0.466195376                            | N                                            | 150                                    | Y                                   |
| TUBA3FP      | 0.466195376                            | N                                            | 0                                      | N                                   |
| USP1         | 0.466228552                            | N                                            | 4                                      | N                                   |
| PCBD2        | 0.466295389                            | N                                            | 0                                      | N                                   |
| HSPA14       | 0.466420415                            | N                                            | 0                                      | N                                   |
| DCTPP1       | 0.466771894                            | N                                            | 1                                      | N                                   |
| HIST1H2BF    | 0.466771894                            | N                                            | 0                                      | N                                   |
| AC099489.1   | 0.466889644                            | N                                            | 0                                      | N                                   |
| AL353194.1   | 0.466889644                            | N                                            | 0                                      | N                                   |
| C6orf120     | 0.466889644                            | N                                            | 0                                      | N                                   |
| FGF17        | 0.466889644                            | N                                            | 5                                      | N                                   |
| IFT122       | 0.466889644                            | N                                            | 2                                      | N                                   |
| KCNK15-AS1   | 0.466889644                            | N                                            | 0                                      | N                                   |
| LGALS3       | 0.466889644                            | N                                            | 65                                     | N                                   |
| LINC01684    | 0.466889644                            | N                                            | 0                                      | N                                   |
| RAB3GAP1     | 0.466889644                            | N                                            | 1                                      | N                                   |
| RBP7         | 0.466889644                            | N                                            | 0                                      | N                                   |
| TMEM154      | 0.466889644                            | N                                            | 2                                      | N                                   |
| ADCY6        | 0.467163342                            | N                                            | 1                                      | N                                   |
| PPP1R2       | 0.467163342                            | N                                            | 1                                      | N                                   |
| RORA         | 0.467163342                            | N                                            | 22                                     | N                                   |
| SHMT1P1      | 0.467163342                            | N                                            | 0                                      | N                                   |
| ACOT7        | 0.46722059                             | N                                            | 4                                      | N                                   |
| PPT1         | 0.46722059                             | N                                            | 2                                      | N                                   |
| CD3EAP       | 0.467280757                            | N                                            | 1                                      | N                                   |
| NEK6         | 0.467280757                            | N                                            | 2                                      | N                                   |
| SMURF2P1     | 0.467280757                            | N                                            | 0                                      | N                                   |
| SFPQ         | 0.467294918                            | N                                            | 11                                     | N                                   |
| AC087388.1   | 0.46732116                             | N                                            | 0                                      | N                                   |
| AL133325.1   | 0.46732116                             | N                                            | 0                                      | N                                   |
| ANO7         | 0.46732116                             | N                                            | 0                                      | N                                   |
| COPB1        | 0.46732116                             | N                                            | 1                                      | N                                   |
| DACT1        | 0.46732116                             | N                                            | 4                                      | N                                   |
| DLGAP1-AS2   | 0.46732116                             | N                                            | 0                                      | N                                   |
| DNAJC3       | 0.46732116                             | N                                            | 11                                     | N                                   |
| DOCK4        | 0.46732116                             | N                                            | 0                                      | N                                   |
| GJC1         | 0.46732116                             | N                                            | 0                                      | N                                   |
| NAPRT        | 0.46732116                             | N                                            | 0                                      | N                                   |
| RAB35        | 0.46732116                             | N                                            | 4                                      | N                                   |
| RFC3         | 0.46732116                             | N                                            | 0                                      | N                                   |
| SMIM10       | 0.46732116                             | N                                            | 0                                      | N                                   |
| ST8SIA6      | 0.46732116                             | N                                            | 0                                      | N                                   |
| TAF8         | 0.46732116                             | N                                            | 0                                      | N                                   |
| ZNF320       | 0.46732116                             | N                                            | 0                                      | N                                   |
| HSPH1        | 0.467383024                            | N                                            | 2                                      | N                                   |
| STARD13-AS   | 0.467383024                            | N                                            | 0                                      | N                                   |
| AIMP1P1      | 0.46741623                             | N                                            | 0                                      | N                                   |
| HHEX         | 0.46741623                             | N                                            | 99                                     | N                                   |

| Gene symbols    | FDR (differential expression analysis) | Differentially expressed gene? Y, Yes; N, No | Number of insulin related publications | Insulin related gene? Y, Yes; N, No |
|-----------------|----------------------------------------|----------------------------------------------|----------------------------------------|-------------------------------------|
| AC008982.2      | 0.467748188                            | N                                            | 0                                      | N                                   |
| AC093330.1      | 0.467748188                            | N                                            | 0                                      | N                                   |
| PRPSAP2         | 0.467748188                            | N                                            | 0                                      | N                                   |
| RTL8C           | 0.467748188                            | N                                            | 0                                      | N                                   |
| SFT2D3          | 0.467748188                            | N                                            | 0                                      | N                                   |
| WDR11           | 0.467748188                            | N                                            | 0                                      | N                                   |
| ATRIP           | 0.468223747                            | N                                            | 0                                      | N                                   |
| PDCD5           | 0.468223747                            | N                                            | 2                                      | N                                   |
| TMEM128         | 0.468234148                            | N                                            | 0                                      | N                                   |
| AC022898.2      | 0.468241649                            | N                                            | 0                                      | N                                   |
| NCL             | 0.468241649                            | N                                            | 126                                    | Y                                   |
| NUTM2B-AS1      | 0.468345889                            | N                                            | 0                                      | N                                   |
| AP002907.1      | 0.468422649                            | N                                            | 0                                      | N                                   |
| HSPA12B         | 0.468422649                            | N                                            | 0                                      | N                                   |
| ITPRIPL2        | 0.468422649                            | N                                            | 0                                      | N                                   |
| MAB21L3         | 0.468422649                            | N                                            | 1                                      | N                                   |
| MPDZ            | 0.46869407                             | N                                            | 1                                      | N                                   |
| ENKD1           | 0.468901648                            | N                                            | 0                                      | N                                   |
| POLD3           | 0.468901648                            | N                                            | 0                                      | N                                   |
| RELB            | 0.468901648                            | N                                            | 15                                     | N                                   |
| RTL8B           | 0.468901648                            | N                                            | 0                                      | N                                   |
| LINC01473       | 0.468926049                            | N                                            | 0                                      | N                                   |
| RDM1            | 0.468926049                            | N                                            | 0                                      | N                                   |
| AC005531.1      | 0.468966597                            | N                                            | 0                                      | N                                   |
| CTC-325H20.2    | 0.468966597                            | N                                            | 0                                      | N                                   |
| FMO6P           | 0.468966597                            | N                                            | 0                                      | N                                   |
| KLF14           | 0.468966597                            | N                                            | 13                                     | N                                   |
| AC008507.5      | 0.469028687                            | N                                            | 0                                      | N                                   |
| AC023509.4      | 0.469028687                            | N                                            | 0                                      | N                                   |
| AC144652.1      | 0.469028687                            | N                                            | 0                                      | N                                   |
| ACO1            | 0.469028687                            | N                                            | 1                                      | N                                   |
| ATP6V1G2-DDX39B | 0.469028687                            | N                                            | 0                                      | N                                   |
| GNG5P2          | 0.469028687                            | N                                            | 0                                      | N                                   |
| MBIP            | 0.469028687                            | N                                            | 0                                      | N                                   |
| AL513165.2      | 0.46917808                             | N                                            | 0                                      | N                                   |
| HIST1H3I        | 0.46917808                             | N                                            | 0                                      | N                                   |
| MAP1LC3A        | 0.46917808                             | N                                            | 7                                      | N                                   |
| MRPL57          | 0.46917808                             | N                                            | 0                                      | N                                   |
| NAV1            | 0.46917808                             | N                                            | 30                                     | N                                   |
| PILRA           | 0.46917808                             | N                                            | 0                                      | N                                   |
| PLS1            | 0.46917808                             | N                                            | 0                                      | N                                   |
| RP11-254F7.4    | 0.46917808                             | N                                            | 0                                      | N                                   |
| RYK             | 0.46917808                             | N                                            | 4                                      | N                                   |
| SFR1P1          | 0.46917808                             | N                                            | 0                                      | N                                   |
| SLC25A10        | 0.46917808                             | N                                            | 2                                      | N                                   |
| VDAC1P8         | 0.46917808                             | N                                            | 0                                      | N                                   |
| EIF4A2P1        | 0.469264674                            | N                                            | 0                                      | N                                   |
| CARS2           | 0.469296901                            | N                                            | 0                                      | N                                   |
| AC007040.2      | 0.469616995                            | N                                            | 0                                      | N                                   |
| AC110079.1      | 0.469616995                            | N                                            | 0                                      | N                                   |
| IQCK            | 0.469616995                            | N                                            | 0                                      | N                                   |
| NUB1            | 0.469616995                            | N                                            | 1                                      | N                                   |
| TMEM55B         | 0.469616995                            | N                                            | 0                                      | N                                   |
| AC006116.8      | 0.469848327                            | N                                            | 0                                      | N                                   |
| PSMB3P2         | 0.469848327                            | N                                            | 0                                      | N                                   |
| HSPA8P5         | 0.469874829                            | N                                            | 0                                      | N                                   |
| INTS3           | 0.469874829                            | N                                            | 0                                      | N                                   |
| PSCA            | 0.469874829                            | N                                            | 7                                      | N                                   |
| TAX1BP1         | 0.469874829                            | N                                            | 1                                      | N                                   |
| AC008514.2      | 0.469933326                            | N                                            | 0                                      | N                                   |
| AC008669.1      | 0.469933326                            | N                                            | 0                                      | N                                   |
| AC025048.4      | 0.469933326                            | N                                            | 0                                      | N                                   |
| AC069544.1      | 0.469933326                            | N                                            | 0                                      | N                                   |
| AC098614.4      | 0.469933326                            | N                                            | 0                                      | N                                   |
| AC104836.1      | 0.469933326                            | N                                            | 0                                      | N                                   |
| AGAP1           | 0.469933326                            | N                                            | 1                                      | N                                   |

| Gene symbols | FDR (differential expression analysis) | Differentially expressed gene? Y, Yes; N, No | Number of insulin related publications | Insulin related gene? Y, Yes; N, No |
|--------------|----------------------------------------|----------------------------------------------|----------------------------------------|-------------------------------------|
| AL360181.2   | 0.469933326                            | N                                            | 0                                      | N                                   |
| ANPEP        | 0.469933326                            | N                                            | 8                                      | N                                   |
| BCDIN3D      | 0.469933326                            | N                                            | 0                                      | N                                   |
| BTN3A3       | 0.469933326                            | N                                            | 0                                      | N                                   |
| C6orf48      | 0.469933326                            | N                                            | 0                                      | N                                   |
| CBX5P1       | 0.469933326                            | N                                            | 0                                      | N                                   |
| CYP26C1      | 0.469933326                            | N                                            | 0                                      | N                                   |
| EGLN2        | 0.469933326                            | N                                            | 3                                      | N                                   |
| EIF1B-AS1    | 0.469933326                            | N                                            | 0                                      | N                                   |
| ERCC5        | 0.469933326                            | N                                            | 2                                      | N                                   |
| EXTL1        | 0.469933326                            | N                                            | 0                                      | N                                   |
| FAM126B      | 0.469933326                            | N                                            | 0                                      | N                                   |
| FYTTD1       | 0.469933326                            | N                                            | 0                                      | N                                   |
| GAD1         | 0.469933326                            | N                                            | 8                                      | N                                   |
| ILKAP        | 0.469933326                            | N                                            | 1                                      | N                                   |
| KIAA1147     | 0.469933326                            | N                                            | 0                                      | N                                   |
| KIAA1324L    | 0.469933326                            | N                                            | 0                                      | N                                   |
| LATS2        | 0.469933326                            | N                                            | 6                                      | N                                   |
| LRRN4CL      | 0.469933326                            | N                                            | 0                                      | N                                   |
| MEOX1        | 0.469933326                            | N                                            | 1                                      | N                                   |
| NCOR1        | 0.469933326                            | N                                            | 25                                     | N                                   |
| PCCA         | 0.469933326                            | N                                            | 3                                      | N                                   |
| PHBP9        | 0.469933326                            | N                                            | 0                                      | N                                   |
| PICALM       | 0.469933326                            | N                                            | 4                                      | N                                   |
| PRSS53       | 0.469933326                            | N                                            | 1                                      | N                                   |
| SECISBP2L    | 0.469933326                            | N                                            | 0                                      | N                                   |
| SLC39A4      | 0.469933326                            | N                                            | 5                                      | N                                   |
| SLC7A4       | 0.469933326                            | N                                            | 0                                      | N                                   |
| TARS2        | 0.469933326                            | N                                            | 0                                      | N                                   |
| TOMM7        | 0.469933326                            | N                                            | 0                                      | N                                   |
| TSPAN9       | 0.469933326                            | N                                            | 2                                      | N                                   |
| USP21        | 0.469933326                            | N                                            | 1                                      | N                                   |
| VEZT         | 0.469933326                            | N                                            | 0                                      | N                                   |
| WDR44        | 0.469933326                            | N                                            | 0                                      | N                                   |
| DUSP27       | 0.470218149                            | N                                            | 1                                      | N                                   |
| IREB2        | 0.470218149                            | N                                            | 0                                      | N                                   |
| DCAF8L2      | 0.470373169                            | N                                            | 0                                      | N                                   |
| AC020658.6   | 0.470419153                            | N                                            | 0                                      | N                                   |
| AP003476.1   | 0.470419153                            | N                                            | 0                                      | N                                   |
| APOE         | 0.470419153                            | N                                            | 950                                    | Y                                   |
| ATP6V1A      | 0.470419153                            | N                                            | 0                                      | N                                   |
| BFSP1        | 0.470419153                            | N                                            | 0                                      | N                                   |
| BNIP3        | 0.470419153                            | N                                            | 40                                     | N                                   |
| CAMKMT       | 0.470419153                            | N                                            | 0                                      | N                                   |
| EIF4A2       | 0.470419153                            | N                                            | 1                                      | N                                   |
| GM2A         | 0.470419153                            | N                                            | 1                                      | N                                   |
| IMPDH2       | 0.470419153                            | N                                            | 1                                      | N                                   |
| MAP4K3       | 0.470419153                            | N                                            | 6                                      | N                                   |
| PNPLA4       | 0.470419153                            | N                                            | 1                                      | N                                   |
| PRG4         | 0.470419153                            | N                                            | 5                                      | N                                   |
| R3HDM1       | 0.470419153                            | N                                            | 0                                      | N                                   |
| RIC8B        | 0.470419153                            | N                                            | 0                                      | N                                   |
| RMND5B       | 0.470419153                            | N                                            | 0                                      | N                                   |
| SDHAP3       | 0.470419153                            | N                                            | 0                                      | N                                   |
| SERPINB2     | 0.470419153                            | N                                            | 4                                      | N                                   |
| SLC35D2      | 0.470419153                            | N                                            | 0                                      | N                                   |
| SPOUT1       | 0.470419153                            | N                                            | 0                                      | N                                   |
| ZNF251       | 0.470419153                            | N                                            | 0                                      | N                                   |
| ZNF786       | 0.470419153                            | N                                            | 0                                      | N                                   |
| FMO5         | 0.470566656                            | N                                            | 1                                      | N                                   |
| RBX1         | 0.470589063                            | N                                            | 3                                      | N                                   |
| A2ML1        | 0.470730918                            | N                                            | 2                                      | N                                   |
| AL662907.2   | 0.471078372                            | N                                            | 0                                      | N                                   |
| DCAF4L2      | 0.471604961                            | N                                            | 0                                      | N                                   |
| GNG7         | 0.471778043                            | N                                            | 0                                      | N                                   |
| RNASEH2B     | 0.471778043                            | N                                            | 1                                      | N                                   |

| Gene symbols | FDR (differential expression analysis) | Differentially expressed gene? Y, Yes; N, No | Number of insulin related publications | Insulin related gene? Y, Yes; N, No |
|--------------|----------------------------------------|----------------------------------------------|----------------------------------------|-------------------------------------|
| TFB1M        | 0.471778043                            | N                                            | 5                                      | N                                   |
| LACTBL1      | 0.471816839                            | N                                            | 0                                      | N                                   |
| C17orf53     | 0.471853334                            | N                                            | 0                                      | N                                   |
| ALS2         | 0.471870402                            | N                                            | 1                                      | N                                   |
| ARHGEF5      | 0.471922859                            | N                                            | 0                                      | N                                   |
| ECHDC2       | 0.471922859                            | N                                            | 0                                      | N                                   |
| CNOT9        | 0.472084148                            | N                                            | 0                                      | N                                   |
| CRELD2       | 0.472084148                            | N                                            | 0                                      | N                                   |
| HMG20B       | 0.472084148                            | N                                            | 0                                      | N                                   |
| MYDGF        | 0.472084148                            | N                                            | 1                                      | N                                   |
| TFAP4        | 0.472084148                            | N                                            | 0                                      | N                                   |
| BX119917.1   | 0.472189954                            | N                                            | 0                                      | N                                   |
| LINC01126    | 0.472189954                            | N                                            | 0                                      | N                                   |
| TMC4         | 0.472189954                            | N                                            | 1                                      | N                                   |
| AC072039.1   | 0.472461005                            | N                                            | 0                                      | N                                   |
| BMP6         | 0.472461005                            | N                                            | 26                                     | N                                   |
| CTSK         | 0.472461005                            | N                                            | 13                                     | N                                   |
| NAE1         | 0.472461005                            | N                                            | 0                                      | N                                   |
| AC093578.1   | 0.472587435                            | N                                            | 0                                      | N                                   |
| CDC42P3      | 0.472587435                            | N                                            | 0                                      | N                                   |
| AC011451.2   | 0.472712703                            | N                                            | 0                                      | N                                   |
| ABCF1        | 0.472810763                            | N                                            | 1                                      | N                                   |
| CRYBG3       | 0.472810763                            | N                                            | 0                                      | N                                   |
| IKZF2        | 0.472810763                            | N                                            | 3                                      | N                                   |
| MATK         | 0.472810763                            | N                                            | 1                                      | N                                   |
| MEX3D        | 0.472810763                            | N                                            | 0                                      | N                                   |
| PTPN12       | 0.472810763                            | N                                            | 4                                      | N                                   |
| SNTB2        | 0.472810763                            | N                                            | 3                                      | N                                   |
| SYNDIG1      | 0.4728471                              | N                                            | 0                                      | N                                   |
| C2orf91      | 0.472923344                            | N                                            | 0                                      | N                                   |
| THSD7B       | 0.472923344                            | N                                            | 0                                      | N                                   |
| HIKESHI      | 0.47314953                             | N                                            | 0                                      | N                                   |
| AC139530.2   | 0.473364288                            | N                                            | 0                                      | N                                   |
| VWCE         | 0.473364288                            | N                                            | 0                                      | N                                   |
| AC104051.2   | 0.473516088                            | N                                            | 0                                      | N                                   |
| RAB3C        | 0.473816574                            | N                                            | 6                                      | N                                   |
| AC093635.1   | 0.474208197                            | N                                            | 0                                      | N                                   |
| HIST1H2BE    | 0.474208197                            | N                                            | 0                                      | N                                   |
| PIP5K1P1     | 0.474208197                            | N                                            | 0                                      | N                                   |
| AC234775.2   | 0.474279041                            | N                                            | 0                                      | N                                   |
| AL049840.5   | 0.474279041                            | N                                            | 0                                      | N                                   |
| DCLK1        | 0.474279041                            | N                                            | 2                                      | N                                   |
| DDX47        | 0.474279041                            | N                                            | 0                                      | N                                   |
| DHX34        | 0.474279041                            | N                                            | 0                                      | N                                   |
| EGLN1        | 0.474279041                            | N                                            | 8                                      | N                                   |
| FADD         | 0.474279041                            | N                                            | 54                                     | N                                   |
| FAM50A       | 0.474279041                            | N                                            | 0                                      | N                                   |
| HIST1H2AK    | 0.474279041                            | N                                            | 0                                      | N                                   |
| NARSP2       | 0.474279041                            | N                                            | 0                                      | N                                   |
| PLA2G4B      | 0.474279041                            | N                                            | 0                                      | N                                   |
| RBM44        | 0.474279041                            | N                                            | 0                                      | N                                   |
| RN7SL37P     | 0.474279041                            | N                                            | 0                                      | N                                   |
| STRIP2       | 0.474279041                            | N                                            | 0                                      | N                                   |
| TCF19        | 0.474279041                            | N                                            | 5                                      | N                                   |
| TPCN1        | 0.474279041                            | N                                            | 4                                      | N                                   |
| RAD9B        | 0.474402582                            | N                                            | 0                                      | N                                   |
| FSD2         | 0.474519925                            | N                                            | 0                                      | N                                   |
| AC100858.3   | 0.474538106                            | N                                            | 0                                      | N                                   |
| CDC27P1      | 0.474538106                            | N                                            | 0                                      | N                                   |
| CEP76        | 0.474538106                            | N                                            | 0                                      | N                                   |
| LINC00216    | 0.474538106                            | N                                            | 0                                      | N                                   |
| PPP1CC       | 0.474538106                            | N                                            | 0                                      | N                                   |
| TRIO         | 0.474538106                            | N                                            | 23                                     | N                                   |
| FAM227B      | 0.474579583                            | N                                            | 0                                      | N                                   |
| HIST4H4      | 0.474579583                            | N                                            | 0                                      | N                                   |
| COQ3         | 0.474654091                            | N                                            | 0                                      | N                                   |



| Gene symbols | FDR (differential expression analysis) | Differentially expressed gene? Y, Yes; N, No | Number of insulin related publications | Insulin related gene? Y, Yes; N, No |
|--------------|----------------------------------------|----------------------------------------------|----------------------------------------|-------------------------------------|
| FOXH1        | 0.474654091                            | N                                            | 0                                      | N                                   |
| GPR22        | 0.474654091                            | N                                            | 1                                      | N                                   |
| SPTY2D1      | 0.474654091                            | N                                            | 0                                      | N                                   |
| SRSF2        | 0.474654091                            | N                                            | 3                                      | N                                   |
| TKFC         | 0.474654091                            | N                                            | 0                                      | N                                   |
| AC025031.4   | 0.474678438                            | N                                            | 0                                      | N                                   |
| EEF1A1P13    | 0.474712702                            | N                                            | 0                                      | N                                   |
| MIR3681HG    | 0.474712702                            | N                                            | 0                                      | N                                   |
| ZHX1-C8orf76 | 0.474740036                            | N                                            | 0                                      | N                                   |
| AC010531.1   | 0.474772832                            | N                                            | 0                                      | N                                   |
| AJ003147.3   | 0.474772832                            | N                                            | 0                                      | N                                   |
| AC025588.1   | 0.47481583                             | N                                            | 0                                      | N                                   |
| LINC00595    | 0.474848539                            | N                                            | 0                                      | N                                   |
| KCNK12       | 0.474899628                            | N                                            | 0                                      | N                                   |
| KCNN3        | 0.475100694                            | N                                            | 3                                      | N                                   |
| AL118506.1   | 0.475144891                            | N                                            | 0                                      | N                                   |
| AL079342.3   | 0.475148812                            | N                                            | 0                                      | N                                   |
| DTWD2        | 0.475148812                            | N                                            | 0                                      | N                                   |
| GPR65        | 0.475232137                            | N                                            | 1                                      | N                                   |
| AC016757.1   | 0.475636635                            | N                                            | 0                                      | N                                   |
| ITCH         | 0.475651586                            | N                                            | 86                                     | N                                   |
| STAT4        | 0.475651586                            | N                                            | 24                                     | N                                   |
| COPS3        | 0.47565714                             | N                                            | 0                                      | N                                   |
| AL513478.2   | 0.475682121                            | N                                            | 0                                      | N                                   |
| GORASP2      | 0.475682164                            | N                                            | 0                                      | N                                   |
| AC007599.2   | 0.475835527                            | N                                            | 0                                      | N                                   |
| DYNC1H1      | 0.475835527                            | N                                            | 1                                      | N                                   |
| SOS1-IT1     | 0.475835527                            | N                                            | 0                                      | N                                   |
| AIFM2        | 0.475991482                            | N                                            | 0                                      | N                                   |
| AL008726.1   | 0.475991482                            | N                                            | 0                                      | N                                   |
| AL138688.2   | 0.475991482                            | N                                            | 0                                      | N                                   |
| AL365214.3   | 0.475991482                            | N                                            | 0                                      | N                                   |
| BTG2         | 0.475991482                            | N                                            | 7                                      | N                                   |
| COQ9         | 0.475991482                            | N                                            | 10                                     | N                                   |
| DSCAM        | 0.475991482                            | N                                            | 2                                      | N                                   |
| DST          | 0.475991482                            | N                                            | 1000                                   | Y                                   |
| LINC01672    | 0.475991482                            | N                                            | 0                                      | N                                   |
| NOTCH1       | 0.475991482                            | N                                            | 76                                     | N                                   |
| NPIPA3       | 0.475991482                            | N                                            | 0                                      | N                                   |
| PIPSL        | 0.475991482                            | N                                            | 0                                      | N                                   |
| AC122688.3   | 0.476423142                            | N                                            | 0                                      | N                                   |
| TMEM45B      | 0.476662296                            | N                                            | 0                                      | N                                   |
| OSGIN2       | 0.476682595                            | N                                            | 0                                      | N                                   |
| GINS2        | 0.476812896                            | N                                            | 0                                      | N                                   |
| ZNF586       | 0.476896819                            | N                                            | 0                                      | N                                   |
| AL109924.2   | 0.476902839                            | N                                            | 0                                      | N                                   |
| AL158071.4   | 0.476902839                            | N                                            | 0                                      | N                                   |
| AL161912.4   | 0.476902839                            | N                                            | 0                                      | N                                   |
| AL162171.3   | 0.476902839                            | N                                            | 0                                      | N                                   |
| LINC00693    | 0.476902839                            | N                                            | 0                                      | N                                   |
| LINC01376    | 0.476902839                            | N                                            | 0                                      | N                                   |
| MMP2         | 0.476902839                            | N                                            | 139                                    | Y                                   |
| OTUD6B       | 0.476902839                            | N                                            | 0                                      | N                                   |
| SLC26A4      | 0.476902839                            | N                                            | 3                                      | N                                   |
| SLC35F1      | 0.476902839                            | N                                            | 0                                      | N                                   |
| ZNF544       | 0.476902839                            | N                                            | 0                                      | N                                   |
| PIAS1        | 0.47690838                             | N                                            | 9                                      | N                                   |
| AC026765.2   | 0.477470536                            | N                                            | 0                                      | N                                   |
| BZW1         | 0.477470536                            | N                                            | 0                                      | N                                   |
| NDST3        | 0.477470536                            | N                                            | 0                                      | N                                   |
| SLC25A13     | 0.477470536                            | N                                            | 4                                      | N                                   |
| AC008610.1   | 0.477499363                            | N                                            | 0                                      | N                                   |
| AL356653.1   | 0.477499363                            | N                                            | 0                                      | N                                   |
| EMC4         | 0.477499363                            | N                                            | 0                                      | N                                   |
| RBFA         | 0.477499363                            | N                                            | 0                                      | N                                   |
| TMCO1        | 0.477499363                            | N                                            | 1                                      | N                                   |

| Gene symbols | FDR (differential expression analysis) | Differentially expressed gene? Y, Yes; N, No | Number of insulin related publications | Insulin related gene? Y, Yes; N, No |
|--------------|----------------------------------------|----------------------------------------------|----------------------------------------|-------------------------------------|
| ZCCHC9       | 0.477499363                            | N                                            | 0                                      | N                                   |
| ZNF587       | 0.477499363                            | N                                            | 0                                      | N                                   |
| C14orf37     | 0.477581206                            | N                                            | 0                                      | N                                   |
| GMPR         | 0.477643251                            | N                                            | 1                                      | N                                   |
| PALMD        | 0.477643251                            | N                                            | 0                                      | N                                   |
| ZNF148       | 0.477643251                            | N                                            | 1                                      | N                                   |
| HEATR1       | 0.477900156                            | N                                            | 0                                      | N                                   |
| HIST1H2AL    | 0.477900156                            | N                                            | 0                                      | N                                   |
| Metazoa_SRP  | 0.477900156                            | N                                            | 0                                      | N                                   |
| SNX29        | 0.477979524                            | N                                            | 1                                      | N                                   |
| AC124312.3   | 0.478047111                            | N                                            | 0                                      | N                                   |
| GPD2         | 0.478184053                            | N                                            | 3                                      | N                                   |
| HIP1         | 0.478184053                            | N                                            | 3                                      | N                                   |
| IFFO1        | 0.478184053                            | N                                            | 0                                      | N                                   |
| LRRC42       | 0.478184053                            | N                                            | 0                                      | N                                   |
| MMAA         | 0.478184053                            | N                                            | 2                                      | N                                   |
| ATP5LP2      | 0.478268657                            | N                                            | 0                                      | N                                   |
| CYP1A1       | 0.478405624                            | N                                            | 68                                     | N                                   |
| AC023509.1   | 0.478432638                            | N                                            | 0                                      | N                                   |
| AC093702.1   | 0.478441556                            | N                                            | 0                                      | N                                   |
| AL139385.1   | 0.478441556                            | N                                            | 0                                      | N                                   |
| ARSJ         | 0.478441556                            | N                                            | 0                                      | N                                   |
| DTX3         | 0.478441556                            | N                                            | 0                                      | N                                   |
| GNA11        | 0.478441556                            | N                                            | 2                                      | N                                   |
| MINDY4       | 0.478441556                            | N                                            | 0                                      | N                                   |
| OAS2         | 0.478441556                            | N                                            | 0                                      | N                                   |
| RNF220       | 0.478441556                            | N                                            | 0                                      | N                                   |
| STK17B       | 0.478441556                            | N                                            | 1                                      | N                                   |
| TUBG1P       | 0.478441556                            | N                                            | 0                                      | N                                   |
| ZNF488       | 0.478441556                            | N                                            | 0                                      | N                                   |
| C2orf48      | 0.478458954                            | N                                            | 0                                      | N                                   |
| COPB2        | 0.478517327                            | N                                            | 0                                      | N                                   |
| MAP4K1       | 0.478517327                            | N                                            | 1                                      | N                                   |
| NUDT8        | 0.478640399                            | N                                            | 0                                      | N                                   |
| IGFL2        | 0.478766625                            | N                                            | 0                                      | N                                   |
| MRPL9        | 0.478766625                            | N                                            | 0                                      | N                                   |
| AC018690.1   | 0.478822329                            | N                                            | 0                                      | N                                   |
| C1QL4        | 0.478822329                            | N                                            | 0                                      | N                                   |
| GPN3         | 0.478822329                            | N                                            | 0                                      | N                                   |
| ZNF469       | 0.478822329                            | N                                            | 0                                      | N                                   |
| ZNF791       | 0.478822329                            | N                                            | 0                                      | N                                   |
| CCDC88A      | 0.47891782                             | N                                            | 10                                     | N                                   |
| UBR3         | 0.479521731                            | N                                            | 0                                      | N                                   |
| YEATS2       | 0.479726247                            | N                                            | 0                                      | N                                   |
| ZNF12        | 0.47985368                             | N                                            | 1                                      | N                                   |
| ACKR3        | 0.479907775                            | N                                            | 2                                      | N                                   |
| PPM1N        | 0.479907775                            | N                                            | 0                                      | N                                   |
| SEC63P1      | 0.4800497                              | N                                            | 0                                      | N                                   |
| FMN1         | 0.480608167                            | N                                            | 1                                      | N                                   |
| Z97989.1     | 0.480736929                            | N                                            | 0                                      | N                                   |
| AC092638.2   | 0.48089238                             | N                                            | 0                                      | N                                   |
| EEF2         | 0.480903134                            | N                                            | 55                                     | N                                   |
| AC010886.1   | 0.481113986                            | N                                            | 0                                      | N                                   |
| AC008147.2   | 0.481194471                            | N                                            | 0                                      | N                                   |
| AC107982.3   | 0.481194471                            | N                                            | 0                                      | N                                   |
| CAB39L       | 0.481194471                            | N                                            | 0                                      | N                                   |
| PERP         | 0.481194471                            | N                                            | 7                                      | N                                   |
| MT1M         | 0.481319121                            | N                                            | 0                                      | N                                   |
| HNRNPCL1     | 0.481383092                            | N                                            | 0                                      | N                                   |
| PFDN2        | 0.481383092                            | N                                            | 0                                      | N                                   |
| AC020893.1   | 0.481732113                            | N                                            | 0                                      | N                                   |
| AC023824.7   | 0.481732113                            | N                                            | 0                                      | N                                   |
| AC125807.2   | 0.481732113                            | N                                            | 0                                      | N                                   |
| ALDH18A1     | 0.481732113                            | N                                            | 2                                      | N                                   |
| LINC01372    | 0.481732113                            | N                                            | 0                                      | N                                   |
| AC016708.1   | 0.481976288                            | N                                            | 0                                      | N                                   |

| Gene symbols | FDR (differential expression analysis) | Differentially expressed gene? Y, Yes; N, No | Number of insulin related publications | Insulin related gene? Y, Yes; N, No |
|--------------|----------------------------------------|----------------------------------------------|----------------------------------------|-------------------------------------|
| CLPB         | 0.481976288                            | N                                            | 4                                      | N                                   |
| MICA         | 0.482936194                            | N                                            | 45                                     | N                                   |
| AC036176.1   | 0.483069799                            | N                                            | 0                                      | N                                   |
| FBXL14       | 0.483069799                            | N                                            | 0                                      | N                                   |
| FOXRED1      | 0.483069799                            | N                                            | 0                                      | N                                   |
| ZNF788       | 0.483069799                            | N                                            | 0                                      | N                                   |
| BRWD3        | 0.483110999                            | N                                            | 0                                      | N                                   |
| HSPA8P4      | 0.483229616                            | N                                            | 0                                      | N                                   |
| SNTG2        | 0.483229616                            | N                                            | 1                                      | N                                   |
| ACAD10       | 0.483292417                            | N                                            | 2                                      | N                                   |
| Metazoa_SRP  | 0.483292417                            | N                                            | 0                                      | N                                   |
| AC002546.1   | 0.483303349                            | N                                            | 0                                      | N                                   |
| AC092115.1   | 0.483303349                            | N                                            | 0                                      | N                                   |
| AL031679.1   | 0.483303349                            | N                                            | 0                                      | N                                   |
| AL356215.1   | 0.483303349                            | N                                            | 0                                      | N                                   |
| AL358852.1   | 0.483303349                            | N                                            | 0                                      | N                                   |
| GMDS-AS1     | 0.483303349                            | N                                            | 0                                      | N                                   |
| MCRS1        | 0.483303349                            | N                                            | 0                                      | N                                   |
| MTFP1        | 0.483303349                            | N                                            | 0                                      | N                                   |
| RPS2P32      | 0.483303349                            | N                                            | 0                                      | N                                   |
| ABT1         | 0.483307191                            | N                                            | 0                                      | N                                   |
| AL031587.5   | 0.483307191                            | N                                            | 0                                      | N                                   |
| AL645568.1   | 0.483307191                            | N                                            | 0                                      | N                                   |
| ARPIN        | 0.483307191                            | N                                            | 0                                      | N                                   |
| CYB561D2     | 0.483307191                            | N                                            | 0                                      | N                                   |
| ELOVL5       | 0.483307191                            | N                                            | 10                                     | N                                   |
| FSTL1        | 0.483307191                            | N                                            | 11                                     | N                                   |
| GPR107       | 0.483307191                            | N                                            | 1                                      | N                                   |
| MMD          | 0.483307191                            | N                                            | 9                                      | N                                   |
| OSMR-AS1     | 0.483307191                            | N                                            | 0                                      | N                                   |
| SPTSSB       | 0.483307191                            | N                                            | 0                                      | N                                   |
| TPRKBP1      | 0.483307191                            | N                                            | 0                                      | N                                   |
| ST3GAL3      | 0.483457648                            | N                                            | 0                                      | N                                   |
| SYNGAP1      | 0.483650374                            | N                                            | 0                                      | N                                   |
| DDX11-AS1    | 0.483650912                            | N                                            | 0                                      | N                                   |
| ZFP42        | 0.4837004                              | N                                            | 0                                      | N                                   |
| G3BP1        | 0.48380383                             | N                                            | 4                                      | N                                   |
| AL359634.1   | 0.484052859                            | N                                            | 0                                      | N                                   |
| AL591475.1   | 0.484052859                            | N                                            | 0                                      | N                                   |
| Clorf52      | 0.484052859                            | N                                            | 0                                      | N                                   |
| CYP51A1P2    | 0.484052859                            | N                                            | 0                                      | N                                   |
| KANSL3       | 0.484052859                            | N                                            | 0                                      | N                                   |
| KLHL36       | 0.484052859                            | N                                            | 0                                      | N                                   |
| LINC01722    | 0.484052859                            | N                                            | 0                                      | N                                   |
| TCP1P1       | 0.484052859                            | N                                            | 0                                      | N                                   |
| ZDHHC5       | 0.484052859                            | N                                            | 0                                      | N                                   |
| SEPT6        | 0.484066209                            | N                                            | 0                                      | N                                   |
| AC114776.1   | 0.484066209                            | N                                            | 0                                      | N                                   |
| BX284668.2   | 0.484066209                            | N                                            | 0                                      | N                                   |
| CLK1         | 0.484066209                            | N                                            | 1                                      | N                                   |
| CTNND1       | 0.484066209                            | N                                            | 0                                      | N                                   |
| KLHL29       | 0.484066209                            | N                                            | 0                                      | N                                   |
| PPP2R5B      | 0.484066209                            | N                                            | 2                                      | N                                   |
| RIMKLA       | 0.484066209                            | N                                            | 0                                      | N                                   |
| SMCHD1       | 0.484066209                            | N                                            | 0                                      | N                                   |
| EMG1         | 0.484173185                            | N                                            | 1                                      | N                                   |
| SPAG16       | 0.484173185                            | N                                            | 1                                      | N                                   |
| AL121886.1   | 0.484382942                            | N                                            | 0                                      | N                                   |
| CFAP54       | 0.484382942                            | N                                            | 0                                      | N                                   |
| RCE1         | 0.484382942                            | N                                            | 0                                      | N                                   |
| SLC25A20     | 0.484382942                            | N                                            | 4                                      | N                                   |
| ZFR          | 0.484619829                            | N                                            | 23                                     | N                                   |
| CHPF         | 0.48485081                             | N                                            | 0                                      | N                                   |
| DPP9-AS1     | 0.48485081                             | N                                            | 0                                      | N                                   |
| RECQL        | 0.48485081                             | N                                            | 1                                      | N                                   |
| SNCA         | 0.48485081                             | N                                            | 14                                     | N                                   |

| Gene symbols | FDR (differential expression analysis) | Differentially expressed gene? Y, Yes; N, No | Number of insulin related publications | Insulin related gene? Y, Yes; N, No |
|--------------|----------------------------------------|----------------------------------------------|----------------------------------------|-------------------------------------|
| WDR41        | 0.48485081                             | N                                            | 0                                      | N                                   |
| BNC2         | 0.485348072                            | N                                            | 1                                      | N                                   |
| ZDHHC21      | 0.485358662                            | N                                            | 0                                      | N                                   |
| PIN1P1       | 0.485370314                            | N                                            | 0                                      | N                                   |
| GLRX3        | 0.485390777                            | N                                            | 0                                      | N                                   |
| FAM149B1     | 0.485407012                            | N                                            | 0                                      | N                                   |
| CSDE1        | 0.485812528                            | N                                            | 0                                      | N                                   |
| BZW1P2       | 0.485866885                            | N                                            | 0                                      | N                                   |
| EFCAB2       | 0.485866885                            | N                                            | 0                                      | N                                   |
| LINC00339    | 0.485881398                            | N                                            | 0                                      | N                                   |
| AC080013.1   | 0.485947059                            | N                                            | 0                                      | N                                   |
| AMPD2        | 0.485947059                            | N                                            | 2                                      | N                                   |
| HIST1H2AM    | 0.485947059                            | N                                            | 0                                      | N                                   |
| OXTR         | 0.485947059                            | N                                            | 9                                      | N                                   |
| ATP6V0A1     | 0.486277518                            | N                                            | 0                                      | N                                   |
| PDZRN4       | 0.486325339                            | N                                            | 1                                      | N                                   |
| BTF3         | 0.486485147                            | N                                            | 0                                      | N                                   |
| DCAF8        | 0.486485147                            | N                                            | 0                                      | N                                   |
| AC254633.1   | 0.486547874                            | N                                            | 0                                      | N                                   |
| BMS1P14      | 0.486780639                            | N                                            | 0                                      | N                                   |
| LINC00222    | 0.486780639                            | N                                            | 0                                      | N                                   |
| AC010255.1   | 0.487062018                            | N                                            | 0                                      | N                                   |
| AC040169.1   | 0.487062018                            | N                                            | 0                                      | N                                   |
| FIZ1         | 0.487062018                            | N                                            | 1                                      | N                                   |
| METTL8       | 0.487062018                            | N                                            | 0                                      | N                                   |
| NIPAL1       | 0.487062018                            | N                                            | 0                                      | N                                   |
| TAB3         | 0.487062018                            | N                                            | 1                                      | N                                   |
| TMEM181      | 0.487062018                            | N                                            | 0                                      | N                                   |
| TP73         | 0.487062018                            | N                                            | 2                                      | N                                   |
| YPEL3        | 0.487062018                            | N                                            | 0                                      | N                                   |
| AC093525.6   | 0.48707948                             | N                                            | 0                                      | N                                   |
| ABCC6        | 0.487113149                            | N                                            | 2                                      | N                                   |
| AC006128.1   | 0.487113149                            | N                                            | 0                                      | N                                   |
| AC025040.2   | 0.487113149                            | N                                            | 0                                      | N                                   |
| AC084824.4   | 0.487113149                            | N                                            | 0                                      | N                                   |
| AC119800.1   | 0.487113149                            | N                                            | 0                                      | N                                   |
| AL136038.3   | 0.487113149                            | N                                            | 0                                      | N                                   |
| AP001767.4   | 0.487113149                            | N                                            | 0                                      | N                                   |
| AP003035.1   | 0.487113149                            | N                                            | 0                                      | N                                   |
| AP2A2        | 0.487113149                            | N                                            | 1                                      | N                                   |
| ARRDC3-AS1   | 0.487113149                            | N                                            | 0                                      | N                                   |
| BCO2         | 0.487113149                            | N                                            | 1                                      | N                                   |
| CAPN5        | 0.487113149                            | N                                            | 1                                      | N                                   |
| CBX5         | 0.487113149                            | N                                            | 0                                      | N                                   |
| CHST2        | 0.487113149                            | N                                            | 0                                      | N                                   |
| COL8A1       | 0.487113149                            | N                                            | 4                                      | N                                   |
| DAG1         | 0.487113149                            | N                                            | 1                                      | N                                   |
| DCLRE1C      | 0.487113149                            | N                                            | 0                                      | N                                   |
| DCP1B        | 0.487113149                            | N                                            | 0                                      | N                                   |
| DEPDC7       | 0.487113149                            | N                                            | 0                                      | N                                   |
| DOCK9-AS2    | 0.487113149                            | N                                            | 0                                      | N                                   |
| FRYL         | 0.487113149                            | N                                            | 0                                      | N                                   |
| GINS1        | 0.487113149                            | N                                            | 1                                      | N                                   |
| GMFG         | 0.487113149                            | N                                            | 0                                      | N                                   |
| HIST1H3H     | 0.487113149                            | N                                            | 0                                      | N                                   |
| IL7R         | 0.487113149                            | N                                            | 3                                      | N                                   |
| KLF9         | 0.487113149                            | N                                            | 10                                     | N                                   |
| LINC02274    | 0.487113149                            | N                                            | 0                                      | N                                   |
| MARK4        | 0.487113149                            | N                                            | 6                                      | N                                   |
| MRPL17       | 0.487113149                            | N                                            | 0                                      | N                                   |
| MTIF2        | 0.487113149                            | N                                            | 0                                      | N                                   |
| NEIL1        | 0.487113149                            | N                                            | 0                                      | N                                   |
| NOP9         | 0.487113149                            | N                                            | 0                                      | N                                   |
| NUDCD1       | 0.487113149                            | N                                            | 1                                      | N                                   |
| PCDHGB7      | 0.487113149                            | N                                            | 0                                      | N                                   |
| PCNA         | 0.487113149                            | N                                            | 581                                    | Y                                   |

| Gene symbols | FDR (differential expression analysis) | Differentially expressed gene? Y, Yes; N, No | Number of insulin related publications | Insulin related gene? Y, Yes; N, No |
|--------------|----------------------------------------|----------------------------------------------|----------------------------------------|-------------------------------------|
| PCSK9        | 0.487113149                            | N                                            | 114                                    | Y                                   |
| PIK3CB       | 0.487113149                            | N                                            | 121                                    | Y                                   |
| PLPPR2       | 0.487113149                            | N                                            | 0                                      | N                                   |
| POLR2I       | 0.487113149                            | N                                            | 0                                      | N                                   |
| PSMB7        | 0.487113149                            | N                                            | 0                                      | N                                   |
| PTPN1        | 0.487113149                            | N                                            | 466                                    | Y                                   |
| PTX3         | 0.487113149                            | N                                            | 43                                     | N                                   |
| RN7SL608P    | 0.487113149                            | N                                            | 0                                      | N                                   |
| SELENOM      | 0.487113149                            | N                                            | 0                                      | N                                   |
| SERPINA3     | 0.487113149                            | N                                            | 2                                      | N                                   |
| SIK3         | 0.487113149                            | N                                            | 9                                      | N                                   |
| SNHG28       | 0.487113149                            | N                                            | 0                                      | N                                   |
| TFRC         | 0.487113149                            | N                                            | 10                                     | N                                   |
| TP53TG1      | 0.487113149                            | N                                            | 0                                      | N                                   |
| USP51        | 0.487113149                            | N                                            | 0                                      | N                                   |
| ZBTB33       | 0.487113149                            | N                                            | 0                                      | N                                   |
| ZRANB1       | 0.487113149                            | N                                            | 0                                      | N                                   |
| TIMP4        | 0.487390805                            | N                                            | 4                                      | N                                   |
| AC010245.2   | 0.487679737                            | N                                            | 0                                      | N                                   |
| AC093716.1   | 0.487679737                            | N                                            | 0                                      | N                                   |
| AC093724.1   | 0.487679737                            | N                                            | 0                                      | N                                   |
| AC097359.2   | 0.487679737                            | N                                            | 0                                      | N                                   |
| AC245297.2   | 0.487679737                            | N                                            | 0                                      | N                                   |
| ADGRG4       | 0.487679737                            | N                                            | 0                                      | N                                   |
| AL136164.3   | 0.487679737                            | N                                            | 0                                      | N                                   |
| ATAD3B       | 0.487679737                            | N                                            | 1                                      | N                                   |
| CACNB4       | 0.487679737                            | N                                            | 1                                      | N                                   |
| IGSF6        | 0.487679737                            | N                                            | 0                                      | N                                   |
| LINC02102    | 0.487679737                            | N                                            | 0                                      | N                                   |
| PUS10        | 0.487679737                            | N                                            | 0                                      | N                                   |
| QRICH2       | 0.487679737                            | N                                            | 0                                      | N                                   |
| TMEM232      | 0.487679737                            | N                                            | 0                                      | N                                   |
| TRIM32       | 0.487679737                            | N                                            | 2                                      | N                                   |
| GJA5         | 0.48780968                             | N                                            | 1                                      | N                                   |
| AK4          | 0.488038742                            | N                                            | 3                                      | N                                   |
| PHF11        | 0.488300635                            | N                                            | 0                                      | N                                   |
| SLC12A1      | 0.488300635                            | N                                            | 10                                     | N                                   |
| ARF4         | 0.488408245                            | N                                            | 0                                      | N                                   |
| FDXACB1      | 0.488408245                            | N                                            | 0                                      | N                                   |
| SHOX2        | 0.488545004                            | N                                            | 12                                     | N                                   |
| MMP24-AS1    | 0.488622085                            | N                                            | 0                                      | N                                   |
| AC010976.1   | 0.488880995                            | N                                            | 0                                      | N                                   |
| AL359220.1   | 0.488880995                            | N                                            | 0                                      | N                                   |
| IGFN1        | 0.488880995                            | N                                            | 0                                      | N                                   |
| ZNF184       | 0.488894122                            | N                                            | 0                                      | N                                   |
| AC055764.2   | 0.489140625                            | N                                            | 0                                      | N                                   |
| AL031587.6   | 0.489140625                            | N                                            | 0                                      | N                                   |
| APOC1        | 0.489140625                            | N                                            | 10                                     | N                                   |
| AC010422.6   | 0.489153271                            | N                                            | 0                                      | N                                   |
| ADGRV1       | 0.489472896                            | N                                            | 0                                      | N                                   |
| DICER1       | 0.489472896                            | N                                            | 22                                     | N                                   |
| NDUFA8       | 0.489472896                            | N                                            | 0                                      | N                                   |
| POLR2K       | 0.489472896                            | N                                            | 0                                      | N                                   |
| TM9SF2       | 0.489472896                            | N                                            | 0                                      | N                                   |
| ZNF449       | 0.489472896                            | N                                            | 0                                      | N                                   |
| ZZEF1        | 0.489472896                            | N                                            | 0                                      | N                                   |
| TENM3        | 0.48953513                             | N                                            | 0                                      | N                                   |
| CASC11       | 0.489762612                            | N                                            | 0                                      | N                                   |
| AC004918.3   | 0.48992189                             | N                                            | 0                                      | N                                   |
| ETNK2        | 0.490482146                            | N                                            | 0                                      | N                                   |
| CGN          | 0.490618794                            | N                                            | 14                                     | N                                   |
| R3HDM2       | 0.490618794                            | N                                            | 0                                      | N                                   |
| TUBE1        | 0.491126714                            | N                                            | 0                                      | N                                   |
| RAB1A        | 0.491188581                            | N                                            | 5                                      | N                                   |
| TRIM52-AS1   | 0.491188581                            | N                                            | 0                                      | N                                   |
| AKR1B1P1     | 0.491241192                            | N                                            | 0                                      | N                                   |

| Gene symbols | FDR (differential expression analysis) | Differentially expressed gene? Y, Yes; N, No | Number of insulin related publications | Insulin related gene? Y, Yes; N, No |
|--------------|----------------------------------------|----------------------------------------------|----------------------------------------|-------------------------------------|
| LINC00242    | 0.491241192                            | N                                            | 0                                      | N                                   |
| NRXN1        | 0.491241192                            | N                                            | 0                                      | N                                   |
| CXorf40B     | 0.491353147                            | N                                            | 0                                      | N                                   |
| LINC00973    | 0.491353147                            | N                                            | 0                                      | N                                   |
| FANCM        | 0.491417298                            | N                                            | 0                                      | N                                   |
| AP000437.1   | 0.491448345                            | N                                            | 0                                      | N                                   |
| CNOT7        | 0.491608564                            | N                                            | 2                                      | N                                   |
| CRYBB2P1     | 0.491608564                            | N                                            | 0                                      | N                                   |
| AL157392.3   | 0.491635123                            | N                                            | 0                                      | N                                   |
| BET1L        | 0.491809487                            | N                                            | 0                                      | N                                   |
| ITGA6        | 0.49202503                             | N                                            | 3                                      | N                                   |
| TLK1P1       | 0.49216601                             | N                                            | 0                                      | N                                   |
| GPS2P1       | 0.492665789                            | N                                            | 0                                      | N                                   |
| FABP5P3      | 0.492668725                            | N                                            | 0                                      | N                                   |
| AC017074.1   | 0.492773845                            | N                                            | 0                                      | N                                   |
| AC068944.1   | 0.492773845                            | N                                            | 0                                      | N                                   |
| LAMA5        | 0.492773845                            | N                                            | 1                                      | N                                   |
| RGS12        | 0.492773845                            | N                                            | 0                                      | N                                   |
| CTPS2        | 0.492846716                            | N                                            | 0                                      | N                                   |
| GATA2-AS1    | 0.492908885                            | N                                            | 0                                      | N                                   |
| ZER1         | 0.492908885                            | N                                            | 0                                      | N                                   |
| THRB-IT1     | 0.493055491                            | N                                            | 0                                      | N                                   |
| FBXL4        | 0.493214758                            | N                                            | 0                                      | N                                   |
| CRTC3-AS1    | 0.493719745                            | N                                            | 0                                      | N                                   |
| AC025031.1   | 0.493726607                            | N                                            | 0                                      | N                                   |
| AC093752.3   | 0.493726607                            | N                                            | 0                                      | N                                   |
| DENND5A      | 0.493726607                            | N                                            | 0                                      | N                                   |
| BPGM         | 0.493833567                            | N                                            | 1                                      | N                                   |
| NSMCE1       | 0.493833567                            | N                                            | 0                                      | N                                   |
| SCAMP1       | 0.493846523                            | N                                            | 0                                      | N                                   |
| CPM          | 0.494457586                            | N                                            | 135                                    | Y                                   |
| IWS1         | 0.494457586                            | N                                            | 0                                      | N                                   |
| YIPF4        | 0.494457586                            | N                                            | 0                                      | N                                   |
| PDE10A       | 0.49554379                             | N                                            | 11                                     | N                                   |
| AC011503.2   | 0.49561682                             | N                                            | 0                                      | N                                   |
| AC099522.2   | 0.49561682                             | N                                            | 0                                      | N                                   |
| AL161909.1   | 0.49561682                             | N                                            | 0                                      | N                                   |
| AP000688.2   | 0.49561682                             | N                                            | 0                                      | N                                   |
| C1orf21      | 0.49561682                             | N                                            | 0                                      | N                                   |
| NFU1P2       | 0.49561682                             | N                                            | 0                                      | N                                   |
| OSBPL10      | 0.49561682                             | N                                            | 0                                      | N                                   |
| PSMD14       | 0.49561682                             | N                                            | 0                                      | N                                   |
| SNX20        | 0.49561682                             | N                                            | 0                                      | N                                   |
| SPA17P1      | 0.49561682                             | N                                            | 0                                      | N                                   |
| U2AF1        | 0.49561682                             | N                                            | 3                                      | N                                   |
| ZNF780B      | 0.49561682                             | N                                            | 0                                      | N                                   |
| AC098965.1   | 0.495723431                            | N                                            | 0                                      | N                                   |
| OAS1         | 0.495892736                            | N                                            | 3                                      | N                                   |
| AL603839.3   | 0.495992261                            | N                                            | 0                                      | N                                   |
| HIST2H3DP1   | 0.496112541                            | N                                            | 0                                      | N                                   |
| SRBD1        | 0.496112541                            | N                                            | 0                                      | N                                   |
| ZNF429       | 0.496112541                            | N                                            | 0                                      | N                                   |
| AL121845.3   | 0.496139889                            | N                                            | 0                                      | N                                   |
| IL23A        | 0.496139889                            | N                                            | 4                                      | N                                   |
| KCNS1        | 0.496171875                            | N                                            | 0                                      | N                                   |
| POLD2        | 0.496221765                            | N                                            | 0                                      | N                                   |
| HERC4        | 0.49626993                             | N                                            | 0                                      | N                                   |
| MSH2         | 0.49626993                             | N                                            | 10                                     | N                                   |
| VPS72        | 0.496464366                            | N                                            | 0                                      | N                                   |
| LAMP5        | 0.496694491                            | N                                            | 0                                      | N                                   |
| OGG1         | 0.496694491                            | N                                            | 20                                     | N                                   |
| RAB5B        | 0.496715892                            | N                                            | 4                                      | N                                   |
| SRD5A1P1     | 0.496715892                            | N                                            | 0                                      | N                                   |
| GRK2         | 0.496783827                            | N                                            | 69                                     | N                                   |
| AC073136.1   | 0.497143479                            | N                                            | 0                                      | N                                   |
| AC090241.2   | 0.497143479                            | N                                            | 0                                      | N                                   |

| Gene symbols | FDR (differential expression analysis) | Differentially expressed gene? Y, Yes; N, No | Number of insulin related publications | Insulin related gene? Y, Yes; N, No |
|--------------|----------------------------------------|----------------------------------------------|----------------------------------------|-------------------------------------|
| KPNA5        | 0.497180199                            | N                                            | 0                                      | N                                   |
| AMBRA1       | 0.49729928                             | N                                            | 3                                      | N                                   |
| MRGPRF-AS1   | 0.497506834                            | N                                            | 0                                      | N                                   |
| AC006504.5   | 0.497659243                            | N                                            | 0                                      | N                                   |
| CDH9         | 0.497659243                            | N                                            | 0                                      | N                                   |
| COG7         | 0.497659243                            | N                                            | 0                                      | N                                   |
| NTMT1        | 0.497659243                            | N                                            | 0                                      | N                                   |
| AC067930.4   | 0.49767786                             | N                                            | 0                                      | N                                   |
| AC006548.3   | 0.498336858                            | N                                            | 0                                      | N                                   |
| AC005046.1   | 0.498490901                            | N                                            | 0                                      | N                                   |
| DNAJC18      | 0.498602665                            | N                                            | 0                                      | N                                   |
| AL590560.2   | 0.498706026                            | N                                            | 0                                      | N                                   |
| PRKN         | 0.498706026                            | N                                            | 3                                      | N                                   |
| SNX22        | 0.498706026                            | N                                            | 0                                      | N                                   |
| AC233263.6   | 0.498707345                            | N                                            | 0                                      | N                                   |
| EIF2B1       | 0.498707345                            | N                                            | 39                                     | N                                   |
| LINC02381    | 0.498707345                            | N                                            | 0                                      | N                                   |
| PIN1         | 0.498707345                            | N                                            | 19                                     | N                                   |
| TCTN1        | 0.498707345                            | N                                            | 1                                      | N                                   |
| MYBL1        | 0.498709612                            | N                                            | 4                                      | N                                   |
| ZNF37A       | 0.498781389                            | N                                            | 0                                      | N                                   |
| Z98257.1     | 0.498984304                            | N                                            | 0                                      | N                                   |
| AL627231.1   | 0.499019951                            | N                                            | 0                                      | N                                   |
| TELO2        | 0.499106738                            | N                                            | 1                                      | N                                   |
| AC112656.1   | 0.499109857                            | N                                            | 0                                      | N                                   |
| AP000962.2   | 0.499229966                            | N                                            | 0                                      | N                                   |
| POLI         | 0.499229966                            | N                                            | 56                                     | N                                   |
| AC004943.1   | 0.499439608                            | N                                            | 0                                      | N                                   |
| TRAF2        | 0.499665556                            | N                                            | 28                                     | N                                   |
| AGRN         | 0.499711647                            | N                                            | 1                                      | N                                   |
| HIF1A-AS1    | 0.499711647                            | N                                            | 0                                      | N                                   |
| MSI2         | 0.499711647                            | N                                            | 2                                      | N                                   |
| NAV3         | 0.499860175                            | N                                            | 1                                      | N                                   |
| GTF3A        | 0.499935087                            | N                                            | 1                                      | N                                   |
| NOP58        | 0.499935087                            | N                                            | 0                                      | N                                   |
| PKP4         | 0.499935087                            | N                                            | 0                                      | N                                   |
| FTL          | 0.499975895                            | N                                            | 3                                      | N                                   |
| AL512506.3   | 0.499986731                            | N                                            | 0                                      | N                                   |
| FGFBP3       | 0.499986731                            | N                                            | 1                                      | N                                   |
| KDM4C        | 0.499986731                            | N                                            | 0                                      | N                                   |
| NHP2P1       | 0.499986731                            | N                                            | 0                                      | N                                   |
| SETP3        | 0.499986731                            | N                                            | 0                                      | N                                   |
| AC015911.4   | 0.500041523                            | N                                            | 0                                      | N                                   |
| AC007613.1   | 0.500095746                            | N                                            | 0                                      | N                                   |
| CATIP        | 0.500137355                            | N                                            | 0                                      | N                                   |
| NAGLU        | 0.500137355                            | N                                            | 7                                      | N                                   |
| KRT34        | 0.500206087                            | N                                            | 0                                      | N                                   |
| AC026111.1   | 0.500478254                            | N                                            | 0                                      | N                                   |
| ATP7A        | 0.500478254                            | N                                            | 11                                     | N                                   |
| C11orf54     | 0.500478254                            | N                                            | 0                                      | N                                   |
| AC138028.1   | 0.500487419                            | N                                            | 0                                      | N                                   |
| CD276        | 0.500487419                            | N                                            | 3                                      | N                                   |
| EDEM3        | 0.500487419                            | N                                            | 0                                      | N                                   |
| KIAA2013     | 0.500487419                            | N                                            | 0                                      | N                                   |
| NPAS3        | 0.500487419                            | N                                            | 2                                      | N                                   |
| PAPSS1       | 0.500487419                            | N                                            | 1                                      | N                                   |
| FGF14        | 0.500560349                            | N                                            | 2                                      | N                                   |
| THEM6        | 0.500560349                            | N                                            | 0                                      | N                                   |
| SNHG25       | 0.500631975                            | N                                            | 0                                      | N                                   |
| YIPF6        | 0.500631975                            | N                                            | 0                                      | N                                   |
| TGIF1        | 0.500671077                            | N                                            | 2                                      | N                                   |
| KCNK6        | 0.500680044                            | N                                            | 0                                      | N                                   |
| MASP2        | 0.500701371                            | N                                            | 0                                      | N                                   |
| ACD          | 0.500932099                            | N                                            | 34                                     | N                                   |
| ATF6         | 0.501049653                            | N                                            | 127                                    | Y                                   |
| PLCD4        | 0.501049653                            | N                                            | 2                                      | N                                   |

| Gene symbols | FDR (differential expression analysis) | Differentially expressed gene? Y, Yes; N, No | Number of insulin related publications | Insulin related gene? Y, Yes; N, No |
|--------------|----------------------------------------|----------------------------------------------|----------------------------------------|-------------------------------------|
| SPTLC1       | 0.501049653                            | N                                            | 3                                      | N                                   |
| SRPK3        | 0.501049653                            | N                                            | 0                                      | N                                   |
| AC008725.1   | 0.501141342                            | N                                            | 0                                      | N                                   |
| MTND5P15     | 0.501222536                            | N                                            | 0                                      | N                                   |
| AC006236.1   | 0.501229252                            | N                                            | 0                                      | N                                   |
| AC011479.3   | 0.501229252                            | N                                            | 0                                      | N                                   |
| ALG10        | 0.501229252                            | N                                            | 0                                      | N                                   |
| FOXL1        | 0.501229252                            | N                                            | 0                                      | N                                   |
| LAMA4        | 0.501229252                            | N                                            | 3                                      | N                                   |
| LINC02019    | 0.501229252                            | N                                            | 0                                      | N                                   |
| MAN2B1       | 0.501229252                            | N                                            | 0                                      | N                                   |
| MYLK         | 0.501229252                            | N                                            | 1                                      | N                                   |
| PIAS2        | 0.501229252                            | N                                            | 0                                      | N                                   |
| CCR10        | 0.501246179                            | N                                            | 4                                      | N                                   |
| AGPAT4       | 0.501507448                            | N                                            | 1                                      | N                                   |
| KRT17        | 0.501602907                            | N                                            | 1                                      | N                                   |
| KIAA1257     | 0.50169841                             | N                                            | 0                                      | N                                   |
| HIST1H2AE    | 0.501875386                            | N                                            | 0                                      | N                                   |
| TOMM6        | 0.501875386                            | N                                            | 1                                      | N                                   |
| AC007552.2   | 0.50191472                             | N                                            | 0                                      | N                                   |
| AC242376.2   | 0.50191472                             | N                                            | 0                                      | N                                   |
| AL353662.3   | 0.50191472                             | N                                            | 0                                      | N                                   |
| CCDC43       | 0.50191472                             | N                                            | 0                                      | N                                   |
| EBLN2        | 0.50191472                             | N                                            | 0                                      | N                                   |
| GPRIN1       | 0.50191472                             | N                                            | 3                                      | N                                   |
| HNRNPUP1     | 0.50191472                             | N                                            | 0                                      | N                                   |
| IGBP1        | 0.50191472                             | N                                            | 2                                      | N                                   |
| PITRM1-AS1   | 0.50191472                             | N                                            | 0                                      | N                                   |
| CHAC2        | 0.502396756                            | N                                            | 0                                      | N                                   |
| PALM2-AKAP2  | 0.502396756                            | N                                            | 0                                      | N                                   |
| RABGGTB      | 0.502396756                            | N                                            | 0                                      | N                                   |
| AL035407.1   | 0.502435891                            | N                                            | 0                                      | N                                   |
| CEP250       | 0.502435891                            | N                                            | 1                                      | N                                   |
| HIST1H4E     | 0.502435891                            | N                                            | 0                                      | N                                   |
| RMI1         | 0.502435891                            | N                                            | 1                                      | N                                   |
| ABCG1        | 0.502726502                            | N                                            | 61                                     | N                                   |
| AC103792.1   | 0.502726502                            | N                                            | 0                                      | N                                   |
| AC231981.1   | 0.502726502                            | N                                            | 0                                      | N                                   |
| AL023803.2   | 0.502726502                            | N                                            | 0                                      | N                                   |
| AL356361.1   | 0.502726502                            | N                                            | 0                                      | N                                   |
| BCDIN3D-AS1  | 0.502726502                            | N                                            | 0                                      | N                                   |
| EI24         | 0.502726502                            | N                                            | 5                                      | N                                   |
| FAM122B      | 0.502726502                            | N                                            | 0                                      | N                                   |
| FAM46C       | 0.502726502                            | N                                            | 0                                      | N                                   |
| GDF1         | 0.502726502                            | N                                            | 1                                      | N                                   |
| GPNMB        | 0.502726502                            | N                                            | 6                                      | N                                   |
| JPH4         | 0.502726502                            | N                                            | 0                                      | N                                   |
| LINC00641    | 0.502726502                            | N                                            | 0                                      | N                                   |
| NLRP2        | 0.502726502                            | N                                            | 3                                      | N                                   |
| PHACTR1      | 0.502726502                            | N                                            | 1                                      | N                                   |
| PRSS3        | 0.502726502                            | N                                            | 1                                      | N                                   |
| SALL2        | 0.502726502                            | N                                            | 1                                      | N                                   |
| SELENOF      | 0.502726502                            | N                                            | 0                                      | N                                   |
| SNRPD2       | 0.502726502                            | N                                            | 0                                      | N                                   |
| TBC1D32      | 0.502726502                            | N                                            | 0                                      | N                                   |
| USP49        | 0.502726502                            | N                                            | 0                                      | N                                   |
| ZNF276       | 0.502726502                            | N                                            | 0                                      | N                                   |
| ZNF785       | 0.502726502                            | N                                            | 0                                      | N                                   |
| MARCH5       | 0.502900538                            | N                                            | 0                                      | N                                   |
| AC078846.1   | 0.502900538                            | N                                            | 0                                      | N                                   |
| AC090510.1   | 0.502900538                            | N                                            | 0                                      | N                                   |
| AC116667.1   | 0.502900538                            | N                                            | 0                                      | N                                   |
| AL365203.1   | 0.502900538                            | N                                            | 0                                      | N                                   |
| ALDH1B1      | 0.502900538                            | N                                            | 3                                      | N                                   |
| EZH1         | 0.502900538                            | N                                            | 3                                      | N                                   |
| KIRREL1      | 0.502900538                            | N                                            | 1                                      | N                                   |



| Gene symbols | FDR (differential expression analysis) | Differentially expressed gene? Y, Yes; N, No | Number of insulin related publications | Insulin related gene? Y, Yes; N, No |
|--------------|----------------------------------------|----------------------------------------------|----------------------------------------|-------------------------------------|
| PLA2G12A     | 0.502900538                            | N                                            | 0                                      | N                                   |
| RN7SL4P      | 0.502900538                            | N                                            | 0                                      | N                                   |
| TNFAIP1      | 0.502900538                            | N                                            | 2                                      | N                                   |
| UBAP1        | 0.502900538                            | N                                            | 0                                      | N                                   |
| COQ6         | 0.502907188                            | N                                            | 2                                      | N                                   |
| LARP1P1      | 0.503047127                            | N                                            | 0                                      | N                                   |
| ORC6         | 0.503047127                            | N                                            | 0                                      | N                                   |
| RAB11AP1     | 0.503047127                            | N                                            | 0                                      | N                                   |
| SUMO4        | 0.503047127                            | N                                            | 14                                     | N                                   |
| B4GAT1       | 0.503094239                            | N                                            | 0                                      | N                                   |
| AF131215.5   | 0.50327891                             | N                                            | 0                                      | N                                   |
| AC138028.2   | 0.503290473                            | N                                            | 0                                      | N                                   |
| KIAA1324     | 0.503761778                            | N                                            | 0                                      | N                                   |
| Metazoa_SRP  | 0.503761778                            | N                                            | 0                                      | N                                   |
| RASSF5       | 0.503761778                            | N                                            | 1                                      | N                                   |
| AC106881.1   | 0.50380131                             | N                                            | 0                                      | N                                   |
| ADAMTSL5     | 0.503886573                            | N                                            | 0                                      | N                                   |
| AC068790.5   | 0.50408442                             | N                                            | 0                                      | N                                   |
| AIMP2        | 0.50408442                             | N                                            | 0                                      | N                                   |
| RP11-160O5.1 | 0.50408442                             | N                                            | 0                                      | N                                   |
| AL139148.1   | 0.504107369                            | N                                            | 0                                      | N                                   |
| ITPR2        | 0.504107369                            | N                                            | 1                                      | N                                   |
| ST6GAL1      | 0.504107369                            | N                                            | 1                                      | N                                   |
| AMOTL2       | 0.504645811                            | N                                            | 0                                      | N                                   |
| AP002770.2   | 0.504645811                            | N                                            | 0                                      | N                                   |
| ARF4P1       | 0.504645811                            | N                                            | 0                                      | N                                   |
| BDKRB1       | 0.504645811                            | N                                            | 1                                      | N                                   |
| DDIT3        | 0.504645811                            | N                                            | 156                                    | Y                                   |
| ESYT2        | 0.504645811                            | N                                            | 0                                      | N                                   |
| FAM30A       | 0.504645811                            | N                                            | 0                                      | N                                   |
| GRIN2C       | 0.504645811                            | N                                            | 0                                      | N                                   |
| LINC00969    | 0.504645811                            | N                                            | 0                                      | N                                   |
| LONRF3       | 0.504645811                            | N                                            | 0                                      | N                                   |
| MRV11-AS1    | 0.504645811                            | N                                            | 0                                      | N                                   |
| AP005717.1   | 0.504711155                            | N                                            | 0                                      | N                                   |
| BRICD5       | 0.504711155                            | N                                            | 0                                      | N                                   |
| RAD23B       | 0.504711155                            | N                                            | 2                                      | N                                   |
| HIST1H2AD    | 0.504742226                            | N                                            | 0                                      | N                                   |
| AC096745.2   | 0.504899253                            | N                                            | 0                                      | N                                   |
| PTPRF        | 0.504899253                            | N                                            | 8                                      | N                                   |
| LGALS1       | 0.504972602                            | N                                            | 0                                      | N                                   |
| GLA          | 0.505046312                            | N                                            | 356                                    | Y                                   |
| BBS2         | 0.505047813                            | N                                            | 1                                      | N                                   |
| TBR1         | 0.505052041                            | N                                            | 1                                      | N                                   |
| AL512329.2   | 0.505204883                            | N                                            | 0                                      | N                                   |
| C1orf123     | 0.505204883                            | N                                            | 0                                      | N                                   |
| CAND1        | 0.505204883                            | N                                            | 0                                      | N                                   |
| HNRNPABP1    | 0.505204883                            | N                                            | 0                                      | N                                   |
| NICN1        | 0.505204883                            | N                                            | 0                                      | N                                   |
| PLB1         | 0.505204883                            | N                                            | 0                                      | N                                   |
| SMYD5        | 0.505204883                            | N                                            | 0                                      | N                                   |
| TYRO3        | 0.505204883                            | N                                            | 6                                      | N                                   |
| XRCC6P2      | 0.505204883                            | N                                            | 0                                      | N                                   |
| AL049795.1   | 0.505934818                            | N                                            | 0                                      | N                                   |
| CRTAP        | 0.506073372                            | N                                            | 0                                      | N                                   |
| NPY2R        | 0.506073372                            | N                                            | 3                                      | N                                   |
| AC000123.3   | 0.50616176                             | N                                            | 0                                      | N                                   |
| RUNX2-AS1    | 0.50616176                             | N                                            | 0                                      | N                                   |
| AL031316.1   | 0.506294622                            | N                                            | 0                                      | N                                   |
| MEG3         | 0.506294622                            | N                                            | 45                                     | N                                   |
| MTMR6        | 0.506294622                            | N                                            | 0                                      | N                                   |
| TMEM220-AS1  | 0.506294622                            | N                                            | 0                                      | N                                   |
| AC097533.1   | 0.506301158                            | N                                            | 0                                      | N                                   |
| ASAP2        | 0.506360837                            | N                                            | 2                                      | N                                   |
| ZNF101       | 0.506360837                            | N                                            | 0                                      | N                                   |
| NUDCD2       | 0.506483476                            | N                                            | 0                                      | N                                   |

| Gene symbols | FDR (differential expression analysis) | Differentially expressed gene? Y, Yes; N, No | Number of insulin related publications | Insulin related gene? Y, Yes; N, No |
|--------------|----------------------------------------|----------------------------------------------|----------------------------------------|-------------------------------------|
| UTP6         | 0.506590999                            | N                                            | 0                                      | N                                   |
| C11orf98     | 0.506688161                            | N                                            | 0                                      | N                                   |
| TP53I11      | 0.506764177                            | N                                            | 2                                      | N                                   |
| AC008758.4   | 0.506957001                            | N                                            | 0                                      | N                                   |
| AC244100.2   | 0.506957001                            | N                                            | 0                                      | N                                   |
| HCAR1        | 0.506957001                            | N                                            | 1                                      | N                                   |
| RSPO1        | 0.506957001                            | N                                            | 9                                      | N                                   |
| AL356235.1   | 0.506966201                            | N                                            | 0                                      | N                                   |
| AC026471.6   | 0.507064644                            | N                                            | 0                                      | N                                   |
| DCN          | 0.507064644                            | N                                            | 46                                     | N                                   |
| EEF1A1P12    | 0.50729372                             | N                                            | 0                                      | N                                   |
| SEC23A       | 0.50729372                             | N                                            | 3                                      | N                                   |
| AL512637.1   | 0.507388954                            | N                                            | 0                                      | N                                   |
| NOL7         | 0.507432599                            | N                                            | 0                                      | N                                   |
| RELT         | 0.507565828                            | N                                            | 0                                      | N                                   |
| AC083967.1   | 0.507567354                            | N                                            | 0                                      | N                                   |
| TATDN2P2     | 0.507567354                            | N                                            | 0                                      | N                                   |
| AC116535.1   | 0.507642588                            | N                                            | 0                                      | N                                   |
| STYXL1       | 0.507642588                            | N                                            | 0                                      | N                                   |
| AC005832.3   | 0.507650658                            | N                                            | 0                                      | N                                   |
| AC096947.1   | 0.507650658                            | N                                            | 0                                      | N                                   |
| ARPC5L       | 0.507650658                            | N                                            | 0                                      | N                                   |
| CDH24        | 0.507650658                            | N                                            | 0                                      | N                                   |
| ELOBP1       | 0.507650658                            | N                                            | 0                                      | N                                   |
| RTN1         | 0.507650658                            | N                                            | 1                                      | N                                   |
| IRAK1        | 0.507775137                            | N                                            | 16                                     | N                                   |
| GPATCH2      | 0.507901296                            | N                                            | 0                                      | N                                   |
| PINK1-AS     | 0.50801545                             | N                                            | 0                                      | N                                   |
| EID3         | 0.508027941                            | N                                            | 1                                      | N                                   |
| IGFL4        | 0.508039633                            | N                                            | 0                                      | N                                   |
| LRRC66       | 0.508110703                            | N                                            | 0                                      | N                                   |
| PCNX4        | 0.508110703                            | N                                            | 0                                      | N                                   |
| STK24-AS1    | 0.508110703                            | N                                            | 0                                      | N                                   |
| ZNF862       | 0.508110703                            | N                                            | 0                                      | N                                   |
| ARHGAP42     | 0.508265621                            | N                                            | 0                                      | N                                   |
| ATG13        | 0.508265621                            | N                                            | 5                                      | N                                   |
| BAZ1B        | 0.508265621                            | N                                            | 1                                      | N                                   |
| BMT2         | 0.508265621                            | N                                            | 0                                      | N                                   |
| COMMD5       | 0.508265621                            | N                                            | 0                                      | N                                   |
| CRHBP        | 0.508265621                            | N                                            | 1                                      | N                                   |
| CTDNEP1      | 0.508265621                            | N                                            | 1                                      | N                                   |
| DNASE1L1     | 0.508265621                            | N                                            | 0                                      | N                                   |
| LY75         | 0.508265621                            | N                                            | 0                                      | N                                   |
| SLC20A2      | 0.508265621                            | N                                            | 1                                      | N                                   |
| AC092989.1   | 0.508375902                            | N                                            | 0                                      | N                                   |
| AP004608.1   | 0.508375902                            | N                                            | 0                                      | N                                   |
| TRIM41       | 0.508375902                            | N                                            | 0                                      | N                                   |
| WEE2-AS1     | 0.508375902                            | N                                            | 0                                      | N                                   |
| CTDSP2       | 0.508502972                            | N                                            | 0                                      | N                                   |
| METTL18      | 0.50858139                             | N                                            | 0                                      | N                                   |
| AC067945.1   | 0.508817716                            | N                                            | 0                                      | N                                   |
| AL391422.3   | 0.508831476                            | N                                            | 0                                      | N                                   |
| TRIM2        | 0.508844106                            | N                                            | 2                                      | N                                   |
| AC098934.1   | 0.508912082                            | N                                            | 0                                      | N                                   |
| FAM184B      | 0.509276344                            | N                                            | 1                                      | N                                   |
| BTBD1        | 0.509714015                            | N                                            | 0                                      | N                                   |
| RBM15B       | 0.509808649                            | N                                            | 0                                      | N                                   |
| AC127521.1   | 0.509844608                            | N                                            | 0                                      | N                                   |
| EPB41L2      | 0.509844608                            | N                                            | 1                                      | N                                   |
| FAM221B      | 0.509844608                            | N                                            | 0                                      | N                                   |
| ZNF630       | 0.509844608                            | N                                            | 0                                      | N                                   |
| MRPL10       | 0.509845406                            | N                                            | 0                                      | N                                   |
| PARP1P1      | 0.509845406                            | N                                            | 0                                      | N                                   |
| ZBED2        | 0.509845406                            | N                                            | 0                                      | N                                   |
| CFAP45       | 0.510326058                            | N                                            | 0                                      | N                                   |
| WDR75        | 0.510326058                            | N                                            | 0                                      | N                                   |

| Gene symbols           | FDR (differential expression analysis) | Differentially expressed gene? Y, Yes; N, No | Number of insulin related publications | Insulin related gene? Y, Yes; N, No |
|------------------------|----------------------------------------|----------------------------------------------|----------------------------------------|-------------------------------------|
| TLL3                   | 0.510342139                            | N                                            | 0                                      | N                                   |
| AP003356.1             | 0.510388021                            | N                                            | 0                                      | N                                   |
| COPA                   | 0.510388021                            | N                                            | 2                                      | N                                   |
| DYRK1B                 | 0.510388021                            | N                                            | 2                                      | N                                   |
| PRMT5                  | 0.510388021                            | N                                            | 4                                      | N                                   |
| AC109347.1             | 0.510610183                            | N                                            | 0                                      | N                                   |
| AL035419.1             | 0.510610183                            | N                                            | 0                                      | N                                   |
| KCTD18                 | 0.510610183                            | N                                            | 0                                      | N                                   |
| MAP7D3                 | 0.510610183                            | N                                            | 0                                      | N                                   |
| PSG8                   | 0.510610183                            | N                                            | 0                                      | N                                   |
| AC067942.3             | 0.51069815                             | N                                            | 0                                      | N                                   |
| SERTAD1                | 0.511150707                            | N                                            | 1                                      | N                                   |
| GRIK1                  | 0.511224821                            | N                                            | 0                                      | N                                   |
| UBR2                   | 0.511224821                            | N                                            | 0                                      | N                                   |
| UHRF1                  | 0.511224821                            | N                                            | 2                                      | N                                   |
| GABRG1                 | 0.51133431                             | N                                            | 0                                      | N                                   |
| MACC1                  | 0.51142139                             | N                                            | 3                                      | N                                   |
| SLC2A9                 | 0.51142139                             | N                                            | 15                                     | N                                   |
| PSMD2                  | 0.51143084                             | N                                            | 0                                      | N                                   |
| STAG3L5P-PVRIG2P-PILRB | 0.51143084                             | N                                            | 0                                      | N                                   |
| UGDH                   | 0.51143084                             | N                                            | 1                                      | N                                   |
| PRPF6                  | 0.511458                               | N                                            | 0                                      | N                                   |
| CCDC30                 | 0.511482                               | N                                            | 0                                      | N                                   |
| DIO1                   | 0.511589642                            | N                                            | 4                                      | N                                   |
| PBRM1                  | 0.511707416                            | N                                            | 1                                      | N                                   |
| AC010653.1             | 0.511739392                            | N                                            | 0                                      | N                                   |
| AC097467.3             | 0.511749134                            | N                                            | 0                                      | N                                   |
| HTRA3                  | 0.511749134                            | N                                            | 3                                      | N                                   |
| HRG                    | 0.511753868                            | N                                            | 30                                     | N                                   |
| BTC                    | 0.511825847                            | N                                            | 94                                     | N                                   |
| LINC02170              | 0.511825847                            | N                                            | 0                                      | N                                   |
| MIAT                   | 0.511859872                            | N                                            | 3                                      | N                                   |
| SPRED2                 | 0.511859872                            | N                                            | 1                                      | N                                   |
| AC068775.1             | 0.511864675                            | N                                            | 0                                      | N                                   |
| AL157838.1             | 0.511864675                            | N                                            | 0                                      | N                                   |
| CD44-AS1               | 0.511864675                            | N                                            | 0                                      | N                                   |
| FAM85B                 | 0.511864675                            | N                                            | 0                                      | N                                   |
| IFITM3                 | 0.511864675                            | N                                            | 2                                      | N                                   |
| SCN11A                 | 0.511864675                            | N                                            | 0                                      | N                                   |
| AKR1B1P3               | 0.511959169                            | N                                            | 0                                      | N                                   |
| NGDN                   | 0.511959169                            | N                                            | 0                                      | N                                   |
| TEAD4                  | 0.511959169                            | N                                            | 4                                      | N                                   |
| RAD9A                  | 0.51198589                             | N                                            | 0                                      | N                                   |
| ULK3                   | 0.512313046                            | N                                            | 0                                      | N                                   |
| AJ239322.1             | 0.512572933                            | N                                            | 0                                      | N                                   |
| DTD1                   | 0.512572933                            | N                                            | 1                                      | N                                   |
| JADE2                  | 0.512572933                            | N                                            | 0                                      | N                                   |
| GALNT7                 | 0.512578718                            | N                                            | 0                                      | N                                   |
| GAS6                   | 0.512578718                            | N                                            | 18                                     | N                                   |
| LINC02141              | 0.512578718                            | N                                            | 0                                      | N                                   |
| PAXIP1-AS1             | 0.512578718                            | N                                            | 0                                      | N                                   |
| SFTA1P                 | 0.512578718                            | N                                            | 0                                      | N                                   |
| STARD7                 | 0.512578718                            | N                                            | 0                                      | N                                   |
| TRAPPC10               | 0.512578718                            | N                                            | 0                                      | N                                   |
| C6orf163               | 0.512621659                            | N                                            | 0                                      | N                                   |
| CCT6A                  | 0.512651055                            | N                                            | 0                                      | N                                   |
| PRMT1                  | 0.51277687                             | N                                            | 9                                      | N                                   |
| TNIP2                  | 0.51277687                             | N                                            | 0                                      | N                                   |
| NAP1L4P3               | 0.512938776                            | N                                            | 0                                      | N                                   |
| NECAP1P1               | 0.5130318                              | N                                            | 0                                      | N                                   |
| AL512634.1             | 0.513101312                            | N                                            | 0                                      | N                                   |
| BORCS5                 | 0.513101312                            | N                                            | 0                                      | N                                   |
| GTF2E2                 | 0.513101312                            | N                                            | 0                                      | N                                   |
| INO80D                 | 0.513101312                            | N                                            | 0                                      | N                                   |
| MROH7                  | 0.513101312                            | N                                            | 0                                      | N                                   |
| RNF135                 | 0.513101312                            | N                                            | 0                                      | N                                   |

| Gene symbols | FDR (differential expression analysis) | Differentially expressed gene? Y, Yes; N, No | Number of insulin related publications | Insulin related gene? Y, Yes; N, No |
|--------------|----------------------------------------|----------------------------------------------|----------------------------------------|-------------------------------------|
| RPA2P3       | 0.513101312                            | N                                            | 0                                      | N                                   |
| AC022384.1   | 0.513426419                            | N                                            | 0                                      | N                                   |
| AL162274.2   | 0.513525349                            | N                                            | 0                                      | N                                   |
| AC079298.1   | 0.51358843                             | N                                            | 0                                      | N                                   |
| ZNF436       | 0.51358843                             | N                                            | 0                                      | N                                   |
| SOX9-AS1     | 0.513833817                            | N                                            | 0                                      | N                                   |
| BCL6B        | 0.513843505                            | N                                            | 1                                      | N                                   |
| ZFP91-CNTF   | 0.513843505                            | N                                            | 0                                      | N                                   |
| AC087893.1   | 0.513936089                            | N                                            | 0                                      | N                                   |
| ADGRA3       | 0.513936089                            | N                                            | 0                                      | N                                   |
| AL033529.1   | 0.513936089                            | N                                            | 0                                      | N                                   |
| ALG2         | 0.513936089                            | N                                            | 0                                      | N                                   |
| CRYL1        | 0.513936089                            | N                                            | 0                                      | N                                   |
| DHCR7        | 0.513936089                            | N                                            | 9                                      | N                                   |
| DIO3OS       | 0.513936089                            | N                                            | 0                                      | N                                   |
| GPAT3        | 0.513936089                            | N                                            | 7                                      | N                                   |
| HLA-E        | 0.513936089                            | N                                            | 5                                      | N                                   |
| HMG20A       | 0.513936089                            | N                                            | 9                                      | N                                   |
| ICAIL        | 0.513936089                            | N                                            | 0                                      | N                                   |
| LINC01360    | 0.513936089                            | N                                            | 0                                      | N                                   |
| LSM6P2       | 0.513936089                            | N                                            | 0                                      | N                                   |
| MACF1        | 0.513936089                            | N                                            | 1                                      | N                                   |
| MKL1         | 0.513936089                            | N                                            | 5                                      | N                                   |
| NDUFAF8      | 0.513936089                            | N                                            | 0                                      | N                                   |
| PAXX         | 0.513936089                            | N                                            | 0                                      | N                                   |
| PLD3         | 0.513936089                            | N                                            | 1                                      | N                                   |
| SLC16A2      | 0.513936089                            | N                                            | 4                                      | N                                   |
| TMEM26       | 0.513936089                            | N                                            | 3                                      | N                                   |
| TSHZ1        | 0.513936089                            | N                                            | 3                                      | N                                   |
| CCDC9        | 0.51401752                             | N                                            | 0                                      | N                                   |
| IL17RA       | 0.51401752                             | N                                            | 2                                      | N                                   |
| PRAG1        | 0.51401752                             | N                                            | 0                                      | N                                   |
| AC009435.1   | 0.514238737                            | N                                            | 0                                      | N                                   |
| ABHD16B      | 0.514269739                            | N                                            | 0                                      | N                                   |
| AC110285.2   | 0.514269739                            | N                                            | 0                                      | N                                   |
| AP002765.1   | 0.514269739                            | N                                            | 0                                      | N                                   |
| CDHR1        | 0.514269739                            | N                                            | 1                                      | N                                   |
| EDRF1        | 0.514269739                            | N                                            | 0                                      | N                                   |
| HARS         | 0.514269739                            | N                                            | 3                                      | N                                   |
| HIST2H2AC    | 0.514269739                            | N                                            | 0                                      | N                                   |
| MED7         | 0.514269739                            | N                                            | 1                                      | N                                   |
| SEN3         | 0.514269739                            | N                                            | 0                                      | N                                   |
| UBE2Q2P1     | 0.514269739                            | N                                            | 0                                      | N                                   |
| WRNIP1       | 0.514269739                            | N                                            | 0                                      | N                                   |
| ZMYM1        | 0.514269739                            | N                                            | 0                                      | N                                   |
| SEN3         | 0.514329937                            | N                                            | 0                                      | N                                   |
| AL365436.2   | 0.514339182                            | N                                            | 0                                      | N                                   |
| CBX1P1       | 0.514339182                            | N                                            | 0                                      | N                                   |
| EIF4A2P2     | 0.514339182                            | N                                            | 0                                      | N                                   |
| MYL9         | 0.514339182                            | N                                            | 0                                      | N                                   |
| RNU4-1       | 0.514339182                            | N                                            | 0                                      | N                                   |
| TTLL5        | 0.514339182                            | N                                            | 0                                      | N                                   |
| GRINA        | 0.514347657                            | N                                            | 4                                      | N                                   |
| AC084782.1   | 0.514405658                            | N                                            | 0                                      | N                                   |
| XRN1         | 0.514405658                            | N                                            | 2                                      | N                                   |
| AC061709.2   | 0.514529057                            | N                                            | 0                                      | N                                   |
| AC138932.3   | 0.514529057                            | N                                            | 0                                      | N                                   |
| ANKRD10      | 0.514529057                            | N                                            | 0                                      | N                                   |
| ASB11        | 0.514529057                            | N                                            | 0                                      | N                                   |
| C5           | 0.514529057                            | N                                            | 110                                    | Y                                   |
| MACROD2      | 0.514529057                            | N                                            | 4                                      | N                                   |
| MAML3        | 0.514529057                            | N                                            | 0                                      | N                                   |
| PXMP2        | 0.514529057                            | N                                            | 2                                      | N                                   |
| ZC3HC1       | 0.514529057                            | N                                            | 0                                      | N                                   |
| ZNF423       | 0.514548843                            | N                                            | 1                                      | N                                   |
| PTPN5        | 0.514643585                            | N                                            | 1                                      | N                                   |

| Gene symbols    | FDR (differential expression analysis) | Differentially expressed gene? Y, Yes; N, No | Number of insulin related publications | Insulin related gene? Y, Yes; N, No |
|-----------------|----------------------------------------|----------------------------------------------|----------------------------------------|-------------------------------------|
| SUGP2           | 0.514643585                            | N                                            | 0                                      | N                                   |
| AL591686.1      | 0.514668437                            | N                                            | 0                                      | N                                   |
| ABCG2           | 0.51470452                             | N                                            | 54                                     | N                                   |
| KRT16           | 0.51470452                             | N                                            | 0                                      | N                                   |
| EIF5AL1         | 0.514971673                            | N                                            | 0                                      | N                                   |
| CDC123          | 0.515041818                            | N                                            | 13                                     | N                                   |
| AL157871.5      | 0.515465886                            | N                                            | 0                                      | N                                   |
| NEK3            | 0.51552907                             | N                                            | 0                                      | N                                   |
| HCN2            | 0.515707372                            | N                                            | 4                                      | N                                   |
| GLUL            | 0.515745279                            | N                                            | 4                                      | N                                   |
| TNFSF12-TNFSF13 | 0.515745279                            | N                                            | 0                                      | N                                   |
| EAPP            | 0.515979344                            | N                                            | 0                                      | N                                   |
| KIAA0319L       | 0.515979344                            | N                                            | 0                                      | N                                   |
| TUSC7           | 0.515979344                            | N                                            | 0                                      | N                                   |
| SDHC            | 0.516437046                            | N                                            | 4                                      | N                                   |
| ATP5EP2         | 0.516593455                            | N                                            | 0                                      | N                                   |
| C2orf69         | 0.516593455                            | N                                            | 0                                      | N                                   |
| GPR137C         | 0.516593455                            | N                                            | 0                                      | N                                   |
| AGAP9           | 0.516595932                            | N                                            | 0                                      | N                                   |
| ADHFE1          | 0.516729328                            | N                                            | 1                                      | N                                   |
| KAT5            | 0.516729328                            | N                                            | 1                                      | N                                   |
| STX12           | 0.516729328                            | N                                            | 0                                      | N                                   |
| PIGN            | 0.51673241                             | N                                            | 0                                      | N                                   |
| SMAD1           | 0.51673241                             | N                                            | 49                                     | N                                   |
| ELFN2           | 0.51681623                             | N                                            | 0                                      | N                                   |
| MEF2C           | 0.51681623                             | N                                            | 49                                     | N                                   |
| POLR2M          | 0.51681623                             | N                                            | 0                                      | N                                   |
| AC011461.1      | 0.516910099                            | N                                            | 0                                      | N                                   |
| AL034550.1      | 0.516910099                            | N                                            | 0                                      | N                                   |
| ANO8            | 0.516910099                            | N                                            | 0                                      | N                                   |
| AC084125.4      | 0.517078827                            | N                                            | 0                                      | N                                   |
| DDX49           | 0.51718202                             | N                                            | 0                                      | N                                   |
| PVRIG           | 0.51718202                             | N                                            | 0                                      | N                                   |
| AL136040.1      | 0.517225014                            | N                                            | 0                                      | N                                   |
| ASXL2           | 0.517343714                            | N                                            | 3                                      | N                                   |
| TTF1            | 0.517910319                            | N                                            | 9                                      | N                                   |
| AC009054.2      | 0.517935093                            | N                                            | 0                                      | N                                   |
| AC103706.1      | 0.517935093                            | N                                            | 0                                      | N                                   |
| AC103923.1      | 0.517935093                            | N                                            | 0                                      | N                                   |
| SLC5A10         | 0.517935093                            | N                                            | 1                                      | N                                   |
| Z99289.3        | 0.517988524                            | N                                            | 0                                      | N                                   |
| HMX1            | 0.518028913                            | N                                            | 1                                      | N                                   |
| AC087369.1      | 0.51811262                             | N                                            | 0                                      | N                                   |
| NGEF            | 0.51811262                             | N                                            | 1                                      | N                                   |
| SDC4            | 0.51811262                             | N                                            | 5                                      | N                                   |
| TOPBP1          | 0.51811262                             | N                                            | 1                                      | N                                   |
| C3orf14         | 0.518187814                            | N                                            | 0                                      | N                                   |
| AC004491.1      | 0.518193837                            | N                                            | 0                                      | N                                   |
| POLD1           | 0.518367242                            | N                                            | 1                                      | N                                   |
| GRSF1           | 0.518398329                            | N                                            | 0                                      | N                                   |
| TERB1           | 0.5184112                              | N                                            | 0                                      | N                                   |
| FUCA1           | 0.518445469                            | N                                            | 0                                      | N                                   |
| RRM2            | 0.518506469                            | N                                            | 3                                      | N                                   |
| LINC01558       | 0.518585249                            | N                                            | 0                                      | N                                   |
| PTPN9           | 0.518585249                            | N                                            | 6                                      | N                                   |
| AL391807.1      | 0.518667779                            | N                                            | 0                                      | N                                   |
| CDC42EP5        | 0.518667779                            | N                                            | 0                                      | N                                   |
| WDR37           | 0.518667779                            | N                                            | 0                                      | N                                   |
| AP001282.2      | 0.518909755                            | N                                            | 0                                      | N                                   |
| ETV3            | 0.518909755                            | N                                            | 1                                      | N                                   |
| GPR156          | 0.518909755                            | N                                            | 0                                      | N                                   |
| MRPL34          | 0.518909755                            | N                                            | 0                                      | N                                   |
| OR52H1          | 0.518909755                            | N                                            | 0                                      | N                                   |
| RBMS2           | 0.518909755                            | N                                            | 0                                      | N                                   |
| RNF144B         | 0.518909755                            | N                                            | 1                                      | N                                   |
| SNRPD1          | 0.518909755                            | N                                            | 1                                      | N                                   |

| Gene symbols | FDR (differential expression analysis) | Differentially expressed gene? Y, Yes; N, No | Number of insulin related publications | Insulin related gene? Y, Yes; N, No |
|--------------|----------------------------------------|----------------------------------------------|----------------------------------------|-------------------------------------|
| SUMO3        | 0.518909755                            | N                                            | 4                                      | N                                   |
| TRIM7        | 0.518909755                            | N                                            | 1                                      | N                                   |
| AC005410.2   | 0.519113866                            | N                                            | 0                                      | N                                   |
| KCTD13       | 0.519113866                            | N                                            | 0                                      | N                                   |
| SLC35G2      | 0.519113866                            | N                                            | 0                                      | N                                   |
| AC008691.1   | 0.519537362                            | N                                            | 0                                      | N                                   |
| ACCS         | 0.519537362                            | N                                            | 27                                     | N                                   |
| ATP2B2       | 0.519537362                            | N                                            | 3                                      | N                                   |
| HTRA1        | 0.519537362                            | N                                            | 13                                     | N                                   |
| FBLIM1       | 0.519552637                            | N                                            | 0                                      | N                                   |
| AC016727.1   | 0.519651808                            | N                                            | 0                                      | N                                   |
| GMPPSP1      | 0.519671178                            | N                                            | 0                                      | N                                   |
| C12orf45     | 0.519841788                            | N                                            | 0                                      | N                                   |
| NPM2         | 0.519841788                            | N                                            | 1                                      | N                                   |
| TRMT61B      | 0.519863159                            | N                                            | 0                                      | N                                   |
| AC012508.1   | 0.519960611                            | N                                            | 0                                      | N                                   |
| AC139712.1   | 0.519960611                            | N                                            | 0                                      | N                                   |
| STARD8       | 0.520133967                            | N                                            | 0                                      | N                                   |
| FBXO36P1     | 0.520244292                            | N                                            | 0                                      | N                                   |
| MFHAS1       | 0.520244292                            | N                                            | 1                                      | N                                   |
| AC004832.3   | 0.520742064                            | N                                            | 0                                      | N                                   |
| AC016590.1   | 0.520742064                            | N                                            | 0                                      | N                                   |
| AC019294.4   | 0.520742064                            | N                                            | 0                                      | N                                   |
| AL161457.2   | 0.520742064                            | N                                            | 0                                      | N                                   |
| AL353898.1   | 0.520742064                            | N                                            | 0                                      | N                                   |
| AL591848.4   | 0.520742064                            | N                                            | 0                                      | N                                   |
| ANAPC15      | 0.520742064                            | N                                            | 0                                      | N                                   |
| DDX18P3      | 0.520742064                            | N                                            | 0                                      | N                                   |
| EXTL2        | 0.520742064                            | N                                            | 0                                      | N                                   |
| FAM109B      | 0.520742064                            | N                                            | 1                                      | N                                   |
| PUF60        | 0.520742064                            | N                                            | 1                                      | N                                   |
| RNF222       | 0.520742064                            | N                                            | 0                                      | N                                   |
| RNU5B-1      | 0.520742064                            | N                                            | 0                                      | N                                   |
| SPATA17      | 0.520742064                            | N                                            | 0                                      | N                                   |
| Z83847.1     | 0.520742064                            | N                                            | 0                                      | N                                   |
| SNORA22B     | 0.520766122                            | N                                            | 0                                      | N                                   |
| STAG3L3      | 0.520766122                            | N                                            | 0                                      | N                                   |
| AP005233.2   | 0.520952953                            | N                                            | 0                                      | N                                   |
| ARPC1A       | 0.520952953                            | N                                            | 0                                      | N                                   |
| KCTD20       | 0.520952953                            | N                                            | 1                                      | N                                   |
| PHACTR3      | 0.520952953                            | N                                            | 0                                      | N                                   |
| RGMB         | 0.520952953                            | N                                            | 1                                      | N                                   |
| SRD5A1       | 0.520952953                            | N                                            | 18                                     | N                                   |
| TBC1D17      | 0.520952953                            | N                                            | 0                                      | N                                   |
| AL139260.3   | 0.520998116                            | N                                            | 0                                      | N                                   |
| PPP1R3C      | 0.521038619                            | N                                            | 21                                     | N                                   |
| AC015813.3   | 0.521217085                            | N                                            | 0                                      | N                                   |
| AL035458.1   | 0.521217085                            | N                                            | 0                                      | N                                   |
| AL359641.1   | 0.521217085                            | N                                            | 0                                      | N                                   |
| C9orf64      | 0.521217085                            | N                                            | 0                                      | N                                   |
| COX6A1P2     | 0.521217085                            | N                                            | 0                                      | N                                   |
| LDB1         | 0.521217085                            | N                                            | 19                                     | N                                   |
| MYO1E        | 0.521217085                            | N                                            | 0                                      | N                                   |
| NHP2         | 0.521217085                            | N                                            | 0                                      | N                                   |
| NRCAM        | 0.521217085                            | N                                            | 2                                      | N                                   |
| SH3BP1       | 0.521217085                            | N                                            | 0                                      | N                                   |
| SLC17A7      | 0.521217085                            | N                                            | 7                                      | N                                   |
| TNFRSF6B     | 0.521217085                            | N                                            | 1                                      | N                                   |
| AC112220.3   | 0.521265799                            | N                                            | 0                                      | N                                   |
| MGA          | 0.521265799                            | N                                            | 11                                     | N                                   |
| BTBD17       | 0.521341338                            | N                                            | 0                                      | N                                   |
| MAPK13       | 0.521430376                            | N                                            | 3                                      | N                                   |
| AL118558.3   | 0.521590783                            | N                                            | 0                                      | N                                   |
| CLSPN        | 0.521590783                            | N                                            | 0                                      | N                                   |
| CPB1         | 0.52178756                             | N                                            | 3                                      | N                                   |
| FAM234A      | 0.52178756                             | N                                            | 0                                      | N                                   |

| Gene symbols | FDR (differential expression analysis) | Differentially expressed gene? Y, Yes; N, No | Number of insulin related publications | Insulin related gene? Y, Yes; N, No |
|--------------|----------------------------------------|----------------------------------------------|----------------------------------------|-------------------------------------|
| RNF125       | 0.522300483                            | N                                            | 0                                      | N                                   |
| DOPEY2       | 0.522394704                            | N                                            | 0                                      | N                                   |
| RANGAP1      | 0.522409165                            | N                                            | 0                                      | N                                   |
| YIPF3        | 0.522409165                            | N                                            | 0                                      | N                                   |
| LINC00638    | 0.522727899                            | N                                            | 0                                      | N                                   |
| ARID1B       | 0.522837284                            | N                                            | 2                                      | N                                   |
| NCBP2        | 0.522837284                            | N                                            | 0                                      | N                                   |
| RNF175       | 0.522837284                            | N                                            | 0                                      | N                                   |
| SPOCK2       | 0.522837284                            | N                                            | 1                                      | N                                   |
| ADGRA1-AS1   | 0.523000981                            | N                                            | 0                                      | N                                   |
| E2F7         | 0.523000981                            | N                                            | 1                                      | N                                   |
| FAM102A      | 0.523000981                            | N                                            | 0                                      | N                                   |
| GRAMD4P3     | 0.523000981                            | N                                            | 0                                      | N                                   |
| ISCA2        | 0.523000981                            | N                                            | 1                                      | N                                   |
| LINC00674    | 0.523000981                            | N                                            | 0                                      | N                                   |
| PCBP1-AS1    | 0.523000981                            | N                                            | 0                                      | N                                   |
| PMS2CL       | 0.523000981                            | N                                            | 0                                      | N                                   |
| RAB11FIP2    | 0.523000981                            | N                                            | 0                                      | N                                   |
| RNF223       | 0.523000981                            | N                                            | 0                                      | N                                   |
| SKAP2        | 0.523000981                            | N                                            | 0                                      | N                                   |
| STOX2        | 0.523000981                            | N                                            | 0                                      | N                                   |
| TOMM5        | 0.523000981                            | N                                            | 0                                      | N                                   |
| ZFHX2        | 0.523000981                            | N                                            | 0                                      | N                                   |
| AL358074.1   | 0.523043465                            | N                                            | 0                                      | N                                   |
| AP002784.2   | 0.523043465                            | N                                            | 0                                      | N                                   |
| POLR2J       | 0.523043465                            | N                                            | 0                                      | N                                   |
| PSMG3-AS1    | 0.523043465                            | N                                            | 0                                      | N                                   |
| RP13-36G14.4 | 0.523043465                            | N                                            | 0                                      | N                                   |
| SCN5A        | 0.523043465                            | N                                            | 11                                     | N                                   |
| ZC4H2        | 0.523043465                            | N                                            | 0                                      | N                                   |
| Z98749.2     | 0.523070927                            | N                                            | 0                                      | N                                   |
| UBR7         | 0.523202002                            | N                                            | 0                                      | N                                   |
| AC091614.1   | 0.52325823                             | N                                            | 0                                      | N                                   |
| BOLA2B       | 0.52325823                             | N                                            | 0                                      | N                                   |
| BRF1         | 0.52325823                             | N                                            | 1                                      | N                                   |
| CCNG2        | 0.52325823                             | N                                            | 6                                      | N                                   |
| IMMP1LP1     | 0.52325823                             | N                                            | 0                                      | N                                   |
| RPL4P6       | 0.52325823                             | N                                            | 0                                      | N                                   |
| WBP4         | 0.52325823                             | N                                            | 0                                      | N                                   |
| WARS2-IT1    | 0.523276413                            | N                                            | 0                                      | N                                   |
| AL031768.1   | 0.52344437                             | N                                            | 0                                      | N                                   |
| ERVW-1       | 0.52367436                             | N                                            | 0                                      | N                                   |
| NACA2        | 0.523703663                            | N                                            | 1                                      | N                                   |
| ELF2         | 0.523726603                            | N                                            | 1                                      | N                                   |
| AC127526.3   | 0.523773798                            | N                                            | 0                                      | N                                   |
| CLPTM1L      | 0.523773798                            | N                                            | 0                                      | N                                   |
| ERVMER61-1   | 0.523773798                            | N                                            | 0                                      | N                                   |
| BIRC6        | 0.524002965                            | N                                            | 1                                      | N                                   |
| HTATIP2      | 0.524002965                            | N                                            | 2                                      | N                                   |
| TBC1D2       | 0.524031962                            | N                                            | 0                                      | N                                   |
| AL390760.1   | 0.524130954                            | N                                            | 0                                      | N                                   |
| TCF3         | 0.524130954                            | N                                            | 8                                      | N                                   |
| UBE2A        | 0.524332267                            | N                                            | 0                                      | N                                   |
| C3orf67      | 0.524358111                            | N                                            | 0                                      | N                                   |
| AC068781.1   | 0.524364847                            | N                                            | 0                                      | N                                   |
| AC092140.1   | 0.524364847                            | N                                            | 0                                      | N                                   |
| AC104996.2   | 0.524364847                            | N                                            | 0                                      | N                                   |
| AL031283.2   | 0.524364847                            | N                                            | 0                                      | N                                   |
| AL138752.1   | 0.524364847                            | N                                            | 0                                      | N                                   |
| AL390123.1   | 0.524364847                            | N                                            | 0                                      | N                                   |
| CHPT1        | 0.524364847                            | N                                            | 0                                      | N                                   |
| DDX60L       | 0.524364847                            | N                                            | 0                                      | N                                   |
| GPR173       | 0.524364847                            | N                                            | 1                                      | N                                   |
| MTRF1L       | 0.524364847                            | N                                            | 0                                      | N                                   |
| ORC1         | 0.524364847                            | N                                            | 2                                      | N                                   |
| SGTB         | 0.524364847                            | N                                            | 0                                      | N                                   |

| Gene symbols | FDR (differential expression analysis) | Differentially expressed gene? Y, Yes; N, No | Number of insulin related publications | Insulin related gene? Y, Yes; N, No |
|--------------|----------------------------------------|----------------------------------------------|----------------------------------------|-------------------------------------|
| SH3RF3-AS1   | 0.524364847                            | N                                            | 0                                      | N                                   |
| SIDT2        | 0.524364847                            | N                                            | 5                                      | N                                   |
| SLC22A20     | 0.524364847                            | N                                            | 0                                      | N                                   |
| EXD3         | 0.524380193                            | N                                            | 0                                      | N                                   |
| FARS2        | 0.52438896                             | N                                            | 0                                      | N                                   |
| ZNF284       | 0.52438896                             | N                                            | 0                                      | N                                   |
| BX322650.1   | 0.524396804                            | N                                            | 0                                      | N                                   |
| ANKIB1       | 0.524400233                            | N                                            | 0                                      | N                                   |
| AC106886.2   | 0.524495226                            | N                                            | 0                                      | N                                   |
| CAPZB        | 0.524608643                            | N                                            | 0                                      | N                                   |
| AC010894.3   | 0.524819768                            | N                                            | 0                                      | N                                   |
| FCFIP2       | 0.525302666                            | N                                            | 0                                      | N                                   |
| AL356481.3   | 0.52545737                             | N                                            | 0                                      | N                                   |
| TWISTNB      | 0.52545737                             | N                                            | 0                                      | N                                   |
| AC087742.1   | 0.525501201                            | N                                            | 0                                      | N                                   |
| ADARB1       | 0.525501201                            | N                                            | 10                                     | N                                   |
| CDC42EP3     | 0.525501201                            | N                                            | 0                                      | N                                   |
| CYB5D2       | 0.525501201                            | N                                            | 0                                      | N                                   |
| EIF4HP1      | 0.525501201                            | N                                            | 0                                      | N                                   |
| HAUS3        | 0.525501201                            | N                                            | 0                                      | N                                   |
| HUWE1        | 0.525501201                            | N                                            | 3                                      | N                                   |
| LY6K         | 0.525501201                            | N                                            | 4                                      | N                                   |
| ZCRB1        | 0.525501201                            | N                                            | 0                                      | N                                   |
| STK36        | 0.525735598                            | N                                            | 0                                      | N                                   |
| LRFN5        | 0.525817453                            | N                                            | 0                                      | N                                   |
| ANKRD35      | 0.525845152                            | N                                            | 0                                      | N                                   |
| SPAG6        | 0.525845152                            | N                                            | 1                                      | N                                   |
| Z97633.1     | 0.525845152                            | N                                            | 0                                      | N                                   |
| ZNF280C      | 0.5258515                              | N                                            | 0                                      | N                                   |
| AC092944.1   | 0.525904834                            | N                                            | 0                                      | N                                   |
| HDC          | 0.525904834                            | N                                            | 23                                     | N                                   |
| SARS         | 0.525904834                            | N                                            | 15                                     | N                                   |
| AVL9         | 0.526206339                            | N                                            | 0                                      | N                                   |
| TMEM117      | 0.526206339                            | N                                            | 0                                      | N                                   |
| ATRX         | 0.52629275                             | N                                            | 10                                     | N                                   |
| FOXO3B       | 0.52629275                             | N                                            | 1                                      | N                                   |
| HOXB2        | 0.52629275                             | N                                            | 3                                      | N                                   |
| NYX          | 0.52629275                             | N                                            | 0                                      | N                                   |
| NOTCH2       | 0.526633087                            | N                                            | 30                                     | N                                   |
| TMCO4        | 0.526633087                            | N                                            | 0                                      | N                                   |
| GEMIN8       | 0.52664578                             | N                                            | 0                                      | N                                   |
| AC007402.1   | 0.526664263                            | N                                            | 0                                      | N                                   |
| PKIA         | 0.526702633                            | N                                            | 1                                      | N                                   |
| uc_338       | 0.526702633                            | N                                            | 0                                      | N                                   |
| CABYR        | 0.527120691                            | N                                            | 1                                      | N                                   |
| RP11-61L19.3 | 0.527120691                            | N                                            | 0                                      | N                                   |
| AL359918.1   | 0.527135792                            | N                                            | 0                                      | N                                   |
| FBXW11P1     | 0.527135792                            | N                                            | 0                                      | N                                   |
| MTIE         | 0.527135792                            | N                                            | 2                                      | N                                   |
| RBL2         | 0.527135792                            | N                                            | 1                                      | N                                   |
| NSMCE2       | 0.52718299                             | N                                            | 1                                      | N                                   |
| SNX19P2      | 0.527297445                            | N                                            | 0                                      | N                                   |
| SLC37A3      | 0.527417348                            | N                                            | 1                                      | N                                   |
| KCNJ10       | 0.527488528                            | N                                            | 7                                      | N                                   |
| TOB2         | 0.527501855                            | N                                            | 1                                      | N                                   |
| COL5A3       | 0.527771254                            | N                                            | 2                                      | N                                   |
| RAB7A        | 0.527771254                            | N                                            | 0                                      | N                                   |
| RCOR2        | 0.527771254                            | N                                            | 3                                      | N                                   |
| SEPHS1       | 0.527771254                            | N                                            | 0                                      | N                                   |
| U2SURP       | 0.527771254                            | N                                            | 0                                      | N                                   |
| AC009852.2   | 0.527833897                            | N                                            | 0                                      | N                                   |
| MINDY2       | 0.527833897                            | N                                            | 0                                      | N                                   |
| TUBG1        | 0.527833897                            | N                                            | 0                                      | N                                   |
| AC073957.3   | 0.52820815                             | N                                            | 0                                      | N                                   |
| FAM129C      | 0.52820815                             | N                                            | 0                                      | N                                   |
| RPL23AP25    | 0.52820815                             | N                                            | 0                                      | N                                   |



| Gene symbols | FDR (differential expression analysis) | Differentially expressed gene? Y, Yes; N, No | Number of insulin related publications | Insulin related gene? Y, Yes; N, No |
|--------------|----------------------------------------|----------------------------------------------|----------------------------------------|-------------------------------------|
| WDR64        | 0.52820815                             | N                                            | 0                                      | N                                   |
| ATP2A3       | 0.528414515                            | N                                            | 12                                     | N                                   |
| CCNYL1       | 0.528494607                            | N                                            | 0                                      | N                                   |
| SESN1        | 0.528494607                            | N                                            | 4                                      | N                                   |
| AC005244.1   | 0.528553769                            | N                                            | 0                                      | N                                   |
| AC139713.2   | 0.528553769                            | N                                            | 0                                      | N                                   |
| BDNF-AS      | 0.528553769                            | N                                            | 4                                      | N                                   |
| GATA6        | 0.528652672                            | N                                            | 35                                     | N                                   |
| AL356481.2   | 0.528933107                            | N                                            | 0                                      | N                                   |
| HAUS6        | 0.528933107                            | N                                            | 0                                      | N                                   |
| HIST1H2AH    | 0.528933107                            | N                                            | 0                                      | N                                   |
| MAP3K3       | 0.528933107                            | N                                            | 4                                      | N                                   |
| DBIL5P       | 0.528940971                            | N                                            | 0                                      | N                                   |
| AK3          | 0.529000942                            | N                                            | 2                                      | N                                   |
| RTEL1        | 0.529077299                            | N                                            | 0                                      | N                                   |
| ANAPC1       | 0.529448978                            | N                                            | 0                                      | N                                   |
| DDX43        | 0.529448978                            | N                                            | 0                                      | N                                   |
| PSMC3IP      | 0.529448978                            | N                                            | 1                                      | N                                   |
| AC090071.1   | 0.529457805                            | N                                            | 0                                      | N                                   |
| GTF2F1       | 0.529457805                            | N                                            | 0                                      | N                                   |
| LINC00888    | 0.529457805                            | N                                            | 0                                      | N                                   |
| CBLN3        | 0.529627048                            | N                                            | 1                                      | N                                   |
| DNASE2       | 0.529627048                            | N                                            | 0                                      | N                                   |
| MCCC2        | 0.529627048                            | N                                            | 1                                      | N                                   |
| AL451105.2   | 0.529684804                            | N                                            | 0                                      | N                                   |
| SCML1        | 0.529684804                            | N                                            | 0                                      | N                                   |
| AC090181.3   | 0.52970142                             | N                                            | 0                                      | N                                   |
| AC117503.3   | 0.52970142                             | N                                            | 0                                      | N                                   |
| AC125257.1   | 0.52970142                             | N                                            | 0                                      | N                                   |
| AKR1B1P7     | 0.529781524                            | N                                            | 0                                      | N                                   |
| CCDC113      | 0.529781524                            | N                                            | 0                                      | N                                   |
| PRKG1-AS1    | 0.529781524                            | N                                            | 0                                      | N                                   |
| ZNF582-AS1   | 0.529781524                            | N                                            | 0                                      | N                                   |
| ZNF607       | 0.529781524                            | N                                            | 0                                      | N                                   |
| LINC00161    | 0.529898818                            | N                                            | 0                                      | N                                   |
| NQO1         | 0.529898818                            | N                                            | 49                                     | N                                   |
| RN7SL505P    | 0.529898818                            | N                                            | 0                                      | N                                   |
| ANKRD6       | 0.529990309                            | N                                            | 0                                      | N                                   |
| LINC00337    | 0.529990309                            | N                                            | 0                                      | N                                   |
| SEC14L6      | 0.529990309                            | N                                            | 0                                      | N                                   |
| SERPINA1     | 0.529990309                            | N                                            | 11                                     | N                                   |
| SLC16A8      | 0.529990309                            | N                                            | 0                                      | N                                   |
| PHB2P1       | 0.530098906                            | N                                            | 0                                      | N                                   |
| AC138932.5   | 0.530117532                            | N                                            | 0                                      | N                                   |
| KLHL7-AS1    | 0.530117532                            | N                                            | 0                                      | N                                   |
| PIGR         | 0.530117532                            | N                                            | 2                                      | N                                   |
| AL162258.1   | 0.530159779                            | N                                            | 0                                      | N                                   |
| RPF1         | 0.530159779                            | N                                            | 0                                      | N                                   |
| ZMYND19      | 0.530159779                            | N                                            | 0                                      | N                                   |
| PHF12        | 0.530230442                            | N                                            | 0                                      | N                                   |
| SPINT1       | 0.530344863                            | N                                            | 0                                      | N                                   |
| CYB5D1       | 0.530357435                            | N                                            | 0                                      | N                                   |
| LAMB3        | 0.530357435                            | N                                            | 1                                      | N                                   |
| SIVA1        | 0.530357435                            | N                                            | 0                                      | N                                   |
| AC007638.2   | 0.53040284                             | N                                            | 0                                      | N                                   |
| AC087477.2   | 0.530494603                            | N                                            | 0                                      | N                                   |
| AGBL4        | 0.530494603                            | N                                            | 0                                      | N                                   |
| AL391244.1   | 0.530494603                            | N                                            | 0                                      | N                                   |
| KDM1A        | 0.530494603                            | N                                            | 4                                      | N                                   |
| SYNPO2       | 0.530494603                            | N                                            | 1                                      | N                                   |
| GSAP         | 0.530501013                            | N                                            | 0                                      | N                                   |
| AC100827.4   | 0.530714947                            | N                                            | 0                                      | N                                   |
| CCDC189      | 0.530714947                            | N                                            | 0                                      | N                                   |
| EIF2S2P2     | 0.530714947                            | N                                            | 0                                      | N                                   |
| NR2C1        | 0.530714947                            | N                                            | 1                                      | N                                   |
| ZNF564       | 0.530714947                            | N                                            | 0                                      | N                                   |

| Gene symbols | FDR (differential expression analysis) | Differentially expressed gene? Y, Yes; N, No | Number of insulin related publications | Insulin related gene? Y, Yes; N, No |
|--------------|----------------------------------------|----------------------------------------------|----------------------------------------|-------------------------------------|
| RAN          | 0.530729209                            | N                                            | 295                                    | Y                                   |
| VTN          | 0.530729209                            | N                                            | 4                                      | N                                   |
| AD000813.1   | 0.530915685                            | N                                            | 0                                      | N                                   |
| NRAV         | 0.531093639                            | N                                            | 0                                      | N                                   |
| OLFM1        | 0.531168892                            | N                                            | 2                                      | N                                   |
| AC016251.1   | 0.531444047                            | N                                            | 0                                      | N                                   |
| DAZAP2       | 0.53155779                             | N                                            | 0                                      | N                                   |
| NUDT21       | 0.53155779                             | N                                            | 1                                      | N                                   |
| MRPS5        | 0.531575634                            | N                                            | 0                                      | N                                   |
| ZRANB2-AS2   | 0.531693583                            | N                                            | 0                                      | N                                   |
| AL359532.1   | 0.531768319                            | N                                            | 0                                      | N                                   |
| AC016831.3   | 0.531810042                            | N                                            | 0                                      | N                                   |
| CNTN3        | 0.531810042                            | N                                            | 0                                      | N                                   |
| F8           | 0.531810042                            | N                                            | 16                                     | N                                   |
| USP5         | 0.531916476                            | N                                            | 0                                      | N                                   |
| AC020763.3   | 0.531927224                            | N                                            | 0                                      | N                                   |
| BAZ2B        | 0.531927224                            | N                                            | 0                                      | N                                   |
| MUC4         | 0.531927224                            | N                                            | 14                                     | N                                   |
| PSME4        | 0.531927224                            | N                                            | 0                                      | N                                   |
| AC006116.1   | 0.53193307                             | N                                            | 0                                      | N                                   |
| ADNP         | 0.53193307                             | N                                            | 0                                      | N                                   |
| AL109613.1   | 0.53193307                             | N                                            | 0                                      | N                                   |
| APOL4        | 0.53193307                             | N                                            | 0                                      | N                                   |
| SLC35F5      | 0.53193307                             | N                                            | 0                                      | N                                   |
| TMEM38B      | 0.53193307                             | N                                            | 0                                      | N                                   |
| ZNF609       | 0.53193307                             | N                                            | 0                                      | N                                   |
| RPL9P9       | 0.531979438                            | N                                            | 0                                      | N                                   |
| TRPM3        | 0.531985023                            | N                                            | 24                                     | N                                   |
| LRRIQ3       | 0.532166323                            | N                                            | 0                                      | N                                   |
| RAB11FIP1    | 0.532313738                            | N                                            | 2                                      | N                                   |
| RHBDL3       | 0.532313738                            | N                                            | 0                                      | N                                   |
| SHANK2-AS3   | 0.532753337                            | N                                            | 0                                      | N                                   |
| AC025458.1   | 0.532870401                            | N                                            | 0                                      | N                                   |
| AC034102.6   | 0.532870401                            | N                                            | 0                                      | N                                   |
| GRM4         | 0.532870401                            | N                                            | 0                                      | N                                   |
| LINC01139    | 0.532943983                            | N                                            | 0                                      | N                                   |
| ANKMY2       | 0.533302572                            | N                                            | 1                                      | N                                   |
| CCDC94       | 0.533461491                            | N                                            | 0                                      | N                                   |
| LARP7        | 0.533461491                            | N                                            | 1                                      | N                                   |
| LINC01561    | 0.533461491                            | N                                            | 0                                      | N                                   |
| TIAM1        | 0.533508061                            | N                                            | 12                                     | N                                   |
| BCL2L13      | 0.5337716                              | N                                            | 0                                      | N                                   |
| AC011755.1   | 0.53409618                             | N                                            | 0                                      | N                                   |
| ABHD17B      | 0.534138818                            | N                                            | 0                                      | N                                   |
| APH1A        | 0.534138818                            | N                                            | 0                                      | N                                   |
| LOXHD1       | 0.534152123                            | N                                            | 0                                      | N                                   |
| RGS10        | 0.534152123                            | N                                            | 2                                      | N                                   |
| ZFAS1        | 0.534152123                            | N                                            | 0                                      | N                                   |
| WAC          | 0.534375623                            | N                                            | 4                                      | N                                   |
| TDRP         | 0.534423547                            | N                                            | 0                                      | N                                   |
| LRMP         | 0.534503709                            | N                                            | 0                                      | N                                   |
| C17orf107    | 0.534535683                            | N                                            | 0                                      | N                                   |
| FNDC1        | 0.534546504                            | N                                            | 0                                      | N                                   |
| HTR1F        | 0.534546504                            | N                                            | 0                                      | N                                   |
| AC008770.3   | 0.534583148                            | N                                            | 0                                      | N                                   |
| AC104852.1   | 0.534583148                            | N                                            | 0                                      | N                                   |
| ATF2         | 0.534583148                            | N                                            | 38                                     | N                                   |
| TMEM38A      | 0.534583148                            | N                                            | 0                                      | N                                   |
| ZCWPW2       | 0.534583148                            | N                                            | 0                                      | N                                   |
| BAP1         | 0.534642991                            | N                                            | 4                                      | N                                   |
| AC017100.1   | 0.5349782                              | N                                            | 0                                      | N                                   |
| AC023825.1   | 0.5349782                              | N                                            | 0                                      | N                                   |
| CAP2P1       | 0.5349782                              | N                                            | 0                                      | N                                   |
| EIF3LP3      | 0.5349782                              | N                                            | 0                                      | N                                   |
| GPR135       | 0.5349782                              | N                                            | 1                                      | N                                   |
| NOP2         | 0.5349782                              | N                                            | 3                                      | N                                   |

| Gene symbols   | FDR (differential expression analysis) | Differentially expressed gene? Y, Yes; N, No | Number of insulin related publications | Insulin related gene? Y, Yes; N, No |
|----------------|----------------------------------------|----------------------------------------------|----------------------------------------|-------------------------------------|
| NUCB2          | 0.5349782                              | N                                            | 74                                     | N                                   |
| SLC38A6        | 0.5349782                              | N                                            | 0                                      | N                                   |
| PDE7A          | 0.534982344                            | N                                            | 2                                      | N                                   |
| CHD8           | 0.535204459                            | N                                            | 0                                      | N                                   |
| SWAP70         | 0.535232826                            | N                                            | 0                                      | N                                   |
| AC005828.6     | 0.535443294                            | N                                            | 0                                      | N                                   |
| NYNRIN         | 0.535443294                            | N                                            | 0                                      | N                                   |
| AL139099.2     | 0.535526373                            | N                                            | 0                                      | N                                   |
| GOLGA7         | 0.535526373                            | N                                            | 0                                      | N                                   |
| TRAF5          | 0.535526373                            | N                                            | 4                                      | N                                   |
| UTS2B          | 0.535526373                            | N                                            | 1                                      | N                                   |
| ZNF2           | 0.535526373                            | N                                            | 0                                      | N                                   |
| ZNF674         | 0.535526373                            | N                                            | 0                                      | N                                   |
| AC079316.1     | 0.535577679                            | N                                            | 0                                      | N                                   |
| PRR27          | 0.535577679                            | N                                            | 0                                      | N                                   |
| SATB2          | 0.535577679                            | N                                            | 5                                      | N                                   |
| C2CD4D         | 0.535767107                            | N                                            | 0                                      | N                                   |
| CCDC92         | 0.535767107                            | N                                            | 3                                      | N                                   |
| RTEL1-TNFRSF6B | 0.535767107                            | N                                            | 0                                      | N                                   |
| H2BFS          | 0.535910704                            | N                                            | 0                                      | N                                   |
| GLIS1          | 0.536288986                            | N                                            | 4                                      | N                                   |
| GON7           | 0.536288986                            | N                                            | 0                                      | N                                   |
| AC105402.1     | 0.536312977                            | N                                            | 0                                      | N                                   |
| TMEM63B        | 0.536312977                            | N                                            | 0                                      | N                                   |
| AC018529.2     | 0.536452925                            | N                                            | 0                                      | N                                   |
| AC108673.3     | 0.536452925                            | N                                            | 0                                      | N                                   |
| LINC00346      | 0.536452925                            | N                                            | 0                                      | N                                   |
| LINC01929      | 0.536452925                            | N                                            | 0                                      | N                                   |
| ABHD2          | 0.536604994                            | N                                            | 0                                      | N                                   |
| AC004160.1     | 0.536604994                            | N                                            | 0                                      | N                                   |
| C5orf15        | 0.536604994                            | N                                            | 0                                      | N                                   |
| CDC45          | 0.536604994                            | N                                            | 1                                      | N                                   |
| GPR179         | 0.536604994                            | N                                            | 0                                      | N                                   |
| MRPS31         | 0.536604994                            | N                                            | 1                                      | N                                   |
| PAXIP1-AS2     | 0.536604994                            | N                                            | 0                                      | N                                   |
| PHYKPL         | 0.536604994                            | N                                            | 0                                      | N                                   |
| AC107398.3     | 0.536643113                            | N                                            | 0                                      | N                                   |
| AC021851.1     | 0.537010207                            | N                                            | 0                                      | N                                   |
| AC073130.1     | 0.537010207                            | N                                            | 0                                      | N                                   |
| LRPPRC         | 0.537010207                            | N                                            | 2                                      | N                                   |
| TMPRSS9        | 0.537010207                            | N                                            | 0                                      | N                                   |
| DHX40P1        | 0.537023233                            | N                                            | 0                                      | N                                   |
| PNLIP          | 0.537023233                            | N                                            | 7                                      | N                                   |
| SCCPDH         | 0.537023233                            | N                                            | 0                                      | N                                   |
| SNRPE          | 0.537023233                            | N                                            | 1                                      | N                                   |
| SRP54-AS1      | 0.537023233                            | N                                            | 0                                      | N                                   |
| TMEM196        | 0.537023233                            | N                                            | 0                                      | N                                   |
| AC015726.1     | 0.537209299                            | N                                            | 0                                      | N                                   |
| ATP6AP1        | 0.537303598                            | N                                            | 2                                      | N                                   |
| AL157756.1     | 0.537439365                            | N                                            | 0                                      | N                                   |
| NR3C1          | 0.537736025                            | N                                            | 40                                     | N                                   |
| PKMYT1         | 0.537862241                            | N                                            | 0                                      | N                                   |
| AC011816.1     | 0.537885457                            | N                                            | 0                                      | N                                   |
| KPNB1          | 0.537885457                            | N                                            | 4                                      | N                                   |
| LINC01858      | 0.537885457                            | N                                            | 0                                      | N                                   |
| FANK1          | 0.537958387                            | N                                            | 0                                      | N                                   |
| HIPK2          | 0.537958387                            | N                                            | 6                                      | N                                   |
| PXT1           | 0.537958387                            | N                                            | 1                                      | N                                   |
| TGFBR1         | 0.53799875                             | N                                            | 49                                     | N                                   |
| HNRNPLP1       | 0.538138702                            | N                                            | 0                                      | N                                   |
| FBXO48         | 0.538294051                            | N                                            | 0                                      | N                                   |
| AC005785.1     | 0.538298488                            | N                                            | 0                                      | N                                   |
| TMEM203        | 0.538298488                            | N                                            | 0                                      | N                                   |
| C1GALT1        | 0.538375303                            | N                                            | 0                                      | N                                   |
| AC004520.1     | 0.538444101                            | N                                            | 0                                      | N                                   |
| AF001548.2     | 0.538444101                            | N                                            | 0                                      | N                                   |

| Gene symbols | FDR (differential expression analysis) | Differentially expressed gene? Y, Yes; N, No | Number of insulin related publications | Insulin related gene? Y, Yes; N, No |
|--------------|----------------------------------------|----------------------------------------------|----------------------------------------|-------------------------------------|
| ANKRD36C     | 0.538444101                            | N                                            | 0                                      | N                                   |
| CHFR         | 0.538444101                            | N                                            | 6                                      | N                                   |
| FO393411.1   | 0.538444101                            | N                                            | 0                                      | N                                   |
| HMGA1P6      | 0.538444101                            | N                                            | 1                                      | N                                   |
| HTR7         | 0.538444101                            | N                                            | 1                                      | N                                   |
| JPH3         | 0.538444101                            | N                                            | 1                                      | N                                   |
| PHKB         | 0.538444101                            | N                                            | 4                                      | N                                   |
| UBE2I        | 0.538444101                            | N                                            | 2                                      | N                                   |
| ZCCHC24      | 0.538444101                            | N                                            | 0                                      | N                                   |
| AL360091.2   | 0.538847036                            | N                                            | 0                                      | N                                   |
| EGR3         | 0.538847036                            | N                                            | 2                                      | N                                   |
| HMGN3P1      | 0.538847036                            | N                                            | 0                                      | N                                   |
| MORN4        | 0.538847036                            | N                                            | 0                                      | N                                   |
| MDM4         | 0.538913791                            | N                                            | 6                                      | N                                   |
| TIMM21       | 0.538913791                            | N                                            | 0                                      | N                                   |
| AC022784.6   | 0.538919831                            | N                                            | 0                                      | N                                   |
| AC114490.1   | 0.538919831                            | N                                            | 0                                      | N                                   |
| AC138907.9   | 0.538919831                            | N                                            | 0                                      | N                                   |
| AL138737.1   | 0.538919831                            | N                                            | 0                                      | N                                   |
| EIF4EBP2P3   | 0.538919831                            | N                                            | 0                                      | N                                   |
| GLB1         | 0.538919831                            | N                                            | 2                                      | N                                   |
| RCBTB2       | 0.538919831                            | N                                            | 0                                      | N                                   |
| TYMS         | 0.538919831                            | N                                            | 3                                      | N                                   |
| TYSND1       | 0.538919831                            | N                                            | 0                                      | N                                   |
| YEATS4       | 0.538919831                            | N                                            | 0                                      | N                                   |
| SHISA7       | 0.538975293                            | N                                            | 0                                      | N                                   |
| ANKRD66      | 0.538990533                            | N                                            | 0                                      | N                                   |
| EVI2A        | 0.538990533                            | N                                            | 0                                      | N                                   |
| LRRC26       | 0.538990533                            | N                                            | 0                                      | N                                   |
| PAAF1        | 0.538990533                            | N                                            | 0                                      | N                                   |
| ST6GALNAC5   | 0.538990533                            | N                                            | 1                                      | N                                   |
| AC002504.1   | 0.539046661                            | N                                            | 0                                      | N                                   |
| AC009264.1   | 0.539046661                            | N                                            | 0                                      | N                                   |
| ANTXR2       | 0.539046661                            | N                                            | 0                                      | N                                   |
| PARP1P2      | 0.539046661                            | N                                            | 0                                      | N                                   |
| SPDL1        | 0.539046661                            | N                                            | 0                                      | N                                   |
| AC084876.2   | 0.539060241                            | N                                            | 0                                      | N                                   |
| ACTG1P1      | 0.539060241                            | N                                            | 0                                      | N                                   |
| AP001596.1   | 0.539060241                            | N                                            | 0                                      | N                                   |
| IDH1         | 0.539060241                            | N                                            | 12                                     | N                                   |
| SETMAR       | 0.539060241                            | N                                            | 0                                      | N                                   |
| DENND2C      | 0.539077105                            | N                                            | 0                                      | N                                   |
| POLG         | 0.539077105                            | N                                            | 1                                      | N                                   |
| AC136469.2   | 0.539437557                            | N                                            | 0                                      | N                                   |
| PTPRO        | 0.53971976                             | N                                            | 2                                      | N                                   |
| TREX1        | 0.53971976                             | N                                            | 2                                      | N                                   |
| AL031667.3   | 0.539956984                            | N                                            | 0                                      | N                                   |
| CTBP1-AS     | 0.540206965                            | N                                            | 1                                      | N                                   |
| KLC3         | 0.540206965                            | N                                            | 0                                      | N                                   |
| KRT8P39      | 0.540206965                            | N                                            | 0                                      | N                                   |
| USP3         | 0.540206965                            | N                                            | 1                                      | N                                   |
| FBXL7        | 0.540607233                            | N                                            | 1                                      | N                                   |
| MIR3936HG    | 0.541084886                            | N                                            | 0                                      | N                                   |
| C11orf49     | 0.541111974                            | N                                            | 0                                      | N                                   |
| CDC25B       | 0.541111974                            | N                                            | 7                                      | N                                   |
| CKAP4        | 0.541111974                            | N                                            | 4                                      | N                                   |
| DDX20        | 0.541111974                            | N                                            | 2                                      | N                                   |
| ERRF1        | 0.541111974                            | N                                            | 12                                     | N                                   |
| GNAI1        | 0.541111974                            | N                                            | 2                                      | N                                   |
| LINC00485    | 0.541111974                            | N                                            | 0                                      | N                                   |
| LINC00707    | 0.541111974                            | N                                            | 0                                      | N                                   |
| LYST         | 0.541111974                            | N                                            | 1                                      | N                                   |
| MRM2         | 0.541111974                            | N                                            | 0                                      | N                                   |
| OFD1P17      | 0.541111974                            | N                                            | 0                                      | N                                   |
| STS          | 0.541111974                            | N                                            | 113                                    | Y                                   |
| TMEM249      | 0.541111974                            | N                                            | 0                                      | N                                   |

| Gene symbols | FDR (differential expression analysis) | Differentially expressed gene? Y, Yes; N, No | Number of insulin related publications | Insulin related gene? Y, Yes; N, No |
|--------------|----------------------------------------|----------------------------------------------|----------------------------------------|-------------------------------------|
| TSPAN8       | 0.541111974                            | N                                            | 17                                     | N                                   |
| USP38        | 0.541111974                            | N                                            | 0                                      | N                                   |
| ZNF280B      | 0.541111974                            | N                                            | 0                                      | N                                   |
| TNFRSF1A     | 0.541122758                            | N                                            | 33                                     | N                                   |
| AC100871.1   | 0.541268167                            | N                                            | 0                                      | N                                   |
| NTRK2        | 0.541464257                            | N                                            | 14                                     | N                                   |
| SETD2        | 0.541464257                            | N                                            | 1                                      | N                                   |
| ANKRD20A19P  | 0.541548742                            | N                                            | 0                                      | N                                   |
| C17orf51     | 0.541548742                            | N                                            | 0                                      | N                                   |
| CBFA2T3      | 0.541548742                            | N                                            | 0                                      | N                                   |
| CENPC        | 0.541548742                            | N                                            | 0                                      | N                                   |
| AL356489.2   | 0.541675076                            | N                                            | 0                                      | N                                   |
| AL513548.3   | 0.541675076                            | N                                            | 0                                      | N                                   |
| FCF1         | 0.541675076                            | N                                            | 0                                      | N                                   |
| HRH1         | 0.541675076                            | N                                            | 0                                      | N                                   |
| UBE2J1       | 0.541675076                            | N                                            | 1                                      | N                                   |
| AC092881.1   | 0.541774399                            | N                                            | 0                                      | N                                   |
| AC104971.2   | 0.541845467                            | N                                            | 0                                      | N                                   |
| AL627309.1   | 0.541845467                            | N                                            | 0                                      | N                                   |
| DMKN         | 0.541845467                            | N                                            | 2                                      | N                                   |
| FGF13        | 0.541845467                            | N                                            | 3                                      | N                                   |
| LAMA3        | 0.541845467                            | N                                            | 3                                      | N                                   |
| LINC01856    | 0.541845467                            | N                                            | 0                                      | N                                   |
| LINC02249    | 0.541845467                            | N                                            | 0                                      | N                                   |
| MARVELD1     | 0.541845467                            | N                                            | 0                                      | N                                   |
| MBOAT1       | 0.541845467                            | N                                            | 0                                      | N                                   |
| SORCS1       | 0.541911673                            | N                                            | 12                                     | N                                   |
| TBX2         | 0.542179512                            | N                                            | 5                                      | N                                   |
| BBS4         | 0.542359431                            | N                                            | 4                                      | N                                   |
| DLC1         | 0.542359431                            | N                                            | 6                                      | N                                   |
| ZSCAN31      | 0.542359431                            | N                                            | 0                                      | N                                   |
| AC005332.6   | 0.542401831                            | N                                            | 0                                      | N                                   |
| NELFB        | 0.542608647                            | N                                            | 0                                      | N                                   |
| ZNF354A      | 0.542617516                            | N                                            | 0                                      | N                                   |
| CYSLTR2      | 0.542913992                            | N                                            | 0                                      | N                                   |
| LSM7         | 0.542913992                            | N                                            | 0                                      | N                                   |
| RASSF3       | 0.542913992                            | N                                            | 0                                      | N                                   |
| SCART1       | 0.542913992                            | N                                            | 0                                      | N                                   |
| SLC26A8      | 0.542913992                            | N                                            | 0                                      | N                                   |
| AC034105.3   | 0.543123871                            | N                                            | 0                                      | N                                   |
| AP000350.4   | 0.543123871                            | N                                            | 0                                      | N                                   |
| CELF2        | 0.543123871                            | N                                            | 3                                      | N                                   |
| CEP135       | 0.543123871                            | N                                            | 0                                      | N                                   |
| LCMT2        | 0.543123871                            | N                                            | 0                                      | N                                   |
| SYS1         | 0.543123871                            | N                                            | 0                                      | N                                   |
| LYPLAL1      | 0.543158119                            | N                                            | 19                                     | N                                   |
| AC019193.2   | 0.543375499                            | N                                            | 0                                      | N                                   |
| AL357054.1   | 0.543375499                            | N                                            | 0                                      | N                                   |
| MEST         | 0.543375499                            | N                                            | 61                                     | N                                   |
| ZNF667-AS1   | 0.543375499                            | N                                            | 0                                      | N                                   |
| CEP41        | 0.543500608                            | N                                            | 0                                      | N                                   |
| HAS2-AS1     | 0.543500608                            | N                                            | 0                                      | N                                   |
| KLRD1        | 0.543500608                            | N                                            | 1                                      | N                                   |
| PELO         | 0.543500608                            | N                                            | 8                                      | N                                   |
| TFE3         | 0.543500608                            | N                                            | 14                                     | N                                   |
| PALLD        | 0.543533039                            | N                                            | 0                                      | N                                   |
| AKAP10       | 0.543534369                            | N                                            | 0                                      | N                                   |
| RIOK3        | 0.54356448                             | N                                            | 1                                      | N                                   |
| MROH7-TTC4   | 0.543628132                            | N                                            | 0                                      | N                                   |
| RBMS3-AS3    | 0.543628132                            | N                                            | 0                                      | N                                   |
| AC069281.2   | 0.543641826                            | N                                            | 0                                      | N                                   |
| AC138035.1   | 0.543641826                            | N                                            | 0                                      | N                                   |
| AL122020.1   | 0.543641826                            | N                                            | 0                                      | N                                   |
| AL662800.1   | 0.543641826                            | N                                            | 0                                      | N                                   |
| CD300E       | 0.543641826                            | N                                            | 0                                      | N                                   |
| CEP131       | 0.543641826                            | N                                            | 0                                      | N                                   |

| Gene symbols | FDR (differential expression analysis) | Differentially expressed gene? Y, Yes; N, No | Number of insulin related publications | Insulin related gene? Y, Yes; N, No |
|--------------|----------------------------------------|----------------------------------------------|----------------------------------------|-------------------------------------|
| HAND2        | 0.543641826                            | N                                            | 11                                     | N                                   |
| MUS81        | 0.543641826                            | N                                            | 0                                      | N                                   |
| PDCD2L       | 0.543641826                            | N                                            | 1                                      | N                                   |
| AC068025.2   | 0.543889892                            | N                                            | 0                                      | N                                   |
| AP003392.6   | 0.543889892                            | N                                            | 0                                      | N                                   |
| ARL6IP4      | 0.543918438                            | N                                            | 0                                      | N                                   |
| FAM110A      | 0.544006445                            | N                                            | 1                                      | N                                   |
| AC098591.1   | 0.544167726                            | N                                            | 0                                      | N                                   |
| AC018892.3   | 0.544216082                            | N                                            | 0                                      | N                                   |
| TNFRSF18     | 0.544216082                            | N                                            | 2                                      | N                                   |
| MEGF10       | 0.544494681                            | N                                            | 0                                      | N                                   |
| NOTO         | 0.544494681                            | N                                            | 74                                     | N                                   |
| VAPA         | 0.544589759                            | N                                            | 2                                      | N                                   |
| AMACR        | 0.544743566                            | N                                            | 7                                      | N                                   |
| HAUS6P1      | 0.544743566                            | N                                            | 0                                      | N                                   |
| JPH1         | 0.544743566                            | N                                            | 0                                      | N                                   |
| TNFRSF21     | 0.544743566                            | N                                            | 3                                      | N                                   |
| TRIM9        | 0.544743566                            | N                                            | 0                                      | N                                   |
| CLSTN1       | 0.544786987                            | N                                            | 0                                      | N                                   |
| NOC2LP1      | 0.544786987                            | N                                            | 0                                      | N                                   |
| THY1         | 0.544825699                            | N                                            | 24                                     | N                                   |
| ZNF347       | 0.544825699                            | N                                            | 0                                      | N                                   |
| MISP         | 0.54523127                             | N                                            | 0                                      | N                                   |
| AAK1         | 0.545490254                            | N                                            | 0                                      | N                                   |
| AC092104.1   | 0.545499812                            | N                                            | 0                                      | N                                   |
| ABCC11       | 0.545700889                            | N                                            | 0                                      | N                                   |
| AC084757.1   | 0.545700889                            | N                                            | 0                                      | N                                   |
| ANKRD54      | 0.545700889                            | N                                            | 0                                      | N                                   |
| CHCHD3       | 0.545700889                            | N                                            | 3                                      | N                                   |
| SLC46A1      | 0.545700889                            | N                                            | 1                                      | N                                   |
| STAT5A       | 0.545700889                            | N                                            | 86                                     | N                                   |
| ZNF658B      | 0.545700889                            | N                                            | 0                                      | N                                   |
| ABHD11-AS1   | 0.545899539                            | N                                            | 0                                      | N                                   |
| AC008555.2   | 0.545899539                            | N                                            | 0                                      | N                                   |
| AC009690.2   | 0.545899539                            | N                                            | 0                                      | N                                   |
| AC091167.3   | 0.545899539                            | N                                            | 0                                      | N                                   |
| AC110926.1   | 0.545899539                            | N                                            | 0                                      | N                                   |
| AC120114.1   | 0.545899539                            | N                                            | 0                                      | N                                   |
| AL136164.4   | 0.545899539                            | N                                            | 0                                      | N                                   |
| AL928970.1   | 0.545899539                            | N                                            | 0                                      | N                                   |
| ATP5F1P6     | 0.545899539                            | N                                            | 0                                      | N                                   |
| BCL2L12P1    | 0.545899539                            | N                                            | 0                                      | N                                   |
| C9orf3       | 0.545899539                            | N                                            | 1                                      | N                                   |
| COPS6        | 0.545899539                            | N                                            | 0                                      | N                                   |
| DNAJB14      | 0.545899539                            | N                                            | 0                                      | N                                   |
| DOT1L        | 0.545899539                            | N                                            | 2                                      | N                                   |
| EEF1DP7      | 0.545899539                            | N                                            | 0                                      | N                                   |
| FAM114A2     | 0.545899539                            | N                                            | 0                                      | N                                   |
| GDPD1        | 0.545899539                            | N                                            | 0                                      | N                                   |
| GOLGA2       | 0.545899539                            | N                                            | 1                                      | N                                   |
| IAPP         | 0.545899539                            | N                                            | 1000                                   | Y                                   |
| KCNAB3       | 0.545899539                            | N                                            | 1                                      | N                                   |
| LINC01191    | 0.545899539                            | N                                            | 0                                      | N                                   |
| LINC02519    | 0.545899539                            | N                                            | 0                                      | N                                   |
| MORF4L2      | 0.545899539                            | N                                            | 0                                      | N                                   |
| NCDN         | 0.545899539                            | N                                            | 0                                      | N                                   |
| NUDT10       | 0.545899539                            | N                                            | 0                                      | N                                   |
| PAX8-AS1     | 0.545899539                            | N                                            | 1                                      | N                                   |
| PRICKLE1     | 0.545899539                            | N                                            | 0                                      | N                                   |
| ROR1-AS1     | 0.545899539                            | N                                            | 0                                      | N                                   |
| RP3-323A16.1 | 0.545899539                            | N                                            | 0                                      | N                                   |
| SLC22A5      | 0.545899539                            | N                                            | 10                                     | N                                   |
| THAP7        | 0.545899539                            | N                                            | 0                                      | N                                   |
| TRIM71       | 0.545899539                            | N                                            | 0                                      | N                                   |
| VAV2         | 0.545899539                            | N                                            | 7                                      | N                                   |
| YAP1         | 0.545899539                            | N                                            | 27                                     | N                                   |

| Gene symbols    | FDR (differential expression analysis) | Differentially expressed gene? Y, Yes; N, No | Number of insulin related publications | Insulin related gene? Y, Yes; N, No |
|-----------------|----------------------------------------|----------------------------------------------|----------------------------------------|-------------------------------------|
| ZNF528          | 0.545899539                            | N                                            | 0                                      | N                                   |
| ZNF530          | 0.545899539                            | N                                            | 0                                      | N                                   |
| AC009118.2      | 0.545953437                            | N                                            | 0                                      | N                                   |
| AC010203.1      | 0.545953437                            | N                                            | 0                                      | N                                   |
| AC083805.2      | 0.545953437                            | N                                            | 0                                      | N                                   |
| AL049874.1      | 0.545953437                            | N                                            | 0                                      | N                                   |
| AL773545.3      | 0.545953437                            | N                                            | 0                                      | N                                   |
| AL928654.2      | 0.545953437                            | N                                            | 0                                      | N                                   |
| DMXL2           | 0.545953437                            | N                                            | 1                                      | N                                   |
| LL22NC03-63E9.3 | 0.545953437                            | N                                            | 0                                      | N                                   |
| PTPN2P2         | 0.545953437                            | N                                            | 0                                      | N                                   |
| TCFL5           | 0.545953437                            | N                                            | 0                                      | N                                   |
| BIVM-ERCC5      | 0.546050147                            | N                                            | 0                                      | N                                   |
| FAM46A          | 0.546050147                            | N                                            | 2                                      | N                                   |
| AL353593.1      | 0.54619583                             | N                                            | 0                                      | N                                   |
| IGLV5-52        | 0.546250416                            | N                                            | 0                                      | N                                   |
| RRAGC           | 0.546311501                            | N                                            | 4                                      | N                                   |
| CCDC96          | 0.546417637                            | N                                            | 0                                      | N                                   |
| DOPEY1          | 0.546417637                            | N                                            | 0                                      | N                                   |
| LDHD            | 0.546417637                            | N                                            | 0                                      | N                                   |
| MFSD14A         | 0.546417637                            | N                                            | 0                                      | N                                   |
| NCS1            | 0.546417637                            | N                                            | 0                                      | N                                   |
| PCDHGC4         | 0.546503127                            | N                                            | 0                                      | N                                   |
| SNAP47          | 0.546512136                            | N                                            | 2                                      | N                                   |
| FAM222B         | 0.546532742                            | N                                            | 0                                      | N                                   |
| COIL            | 0.546627476                            | N                                            | 164                                    | Y                                   |
| HSPD1           | 0.546627476                            | N                                            | 10                                     | N                                   |
| C7orf65         | 0.546726335                            | N                                            | 0                                      | N                                   |
| SLC35G1         | 0.546880376                            | N                                            | 0                                      | N                                   |
| IFI30           | 0.546889519                            | N                                            | 2                                      | N                                   |
| TBC1D31         | 0.546893407                            | N                                            | 0                                      | N                                   |
| POGK            | 0.546935509                            | N                                            | 0                                      | N                                   |
| CDV3P1          | 0.547214476                            | N                                            | 0                                      | N                                   |
| TSPAN10         | 0.547214476                            | N                                            | 0                                      | N                                   |
| AL355312.1      | 0.547251536                            | N                                            | 0                                      | N                                   |
| AMDHD2          | 0.547251536                            | N                                            | 0                                      | N                                   |
| ATP6V1H         | 0.547251536                            | N                                            | 2                                      | N                                   |
| NPM1P37         | 0.547251536                            | N                                            | 0                                      | N                                   |
| COL3A1          | 0.547376129                            | N                                            | 30                                     | N                                   |
| DCAF1           | 0.547376129                            | N                                            | 0                                      | N                                   |
| SPTA1           | 0.547376129                            | N                                            | 1                                      | N                                   |
| ACYP1           | 0.547434996                            | N                                            | 0                                      | N                                   |
| AC010287.1      | 0.547735081                            | N                                            | 0                                      | N                                   |
| NAP1L1P2        | 0.547735081                            | N                                            | 0                                      | N                                   |
| POLHP1          | 0.547735081                            | N                                            | 0                                      | N                                   |
| RP11-159G9.5    | 0.547735081                            | N                                            | 0                                      | N                                   |
| DHRS4-AS1       | 0.547877315                            | N                                            | 0                                      | N                                   |
| LEPROTL1        | 0.547877315                            | N                                            | 3                                      | N                                   |
| VSTM4           | 0.547877315                            | N                                            | 0                                      | N                                   |
| PABPC5          | 0.547926175                            | N                                            | 0                                      | N                                   |
| LRRC40          | 0.548037022                            | N                                            | 0                                      | N                                   |
| ARHGAP12        | 0.548078066                            | N                                            | 0                                      | N                                   |
| AP001273.1      | 0.548246094                            | N                                            | 0                                      | N                                   |
| HDAC3           | 0.548246094                            | N                                            | 60                                     | N                                   |
| ORC2            | 0.548246094                            | N                                            | 0                                      | N                                   |
| SNRPBP1         | 0.548246094                            | N                                            | 0                                      | N                                   |
| WBP1LP2         | 0.548246094                            | N                                            | 0                                      | N                                   |
| ADAM29          | 0.54826141                             | N                                            | 0                                      | N                                   |
| AP001324.1      | 0.54826141                             | N                                            | 0                                      | N                                   |
| DTX1            | 0.54826141                             | N                                            | 0                                      | N                                   |
| EPPK1           | 0.54826141                             | N                                            | 0                                      | N                                   |
| OSGEPL1         | 0.54826141                             | N                                            | 0                                      | N                                   |
| PEX5L           | 0.54826141                             | N                                            | 0                                      | N                                   |
| GAPVD1          | 0.548430946                            | N                                            | 0                                      | N                                   |
| OR52H2P         | 0.548948623                            | N                                            | 0                                      | N                                   |
| AC132192.2      | 0.549066132                            | N                                            | 0                                      | N                                   |

| Gene symbols | FDR (differential expression analysis) | Differentially expressed gene? Y, Yes; N, No | Number of insulin related publications | Insulin related gene? Y, Yes; N, No |
|--------------|----------------------------------------|----------------------------------------------|----------------------------------------|-------------------------------------|
| IFRD2        | 0.549066132                            | N                                            | 0                                      | N                                   |
| LINC02449    | 0.549066132                            | N                                            | 0                                      | N                                   |
| MAB21L2      | 0.549066132                            | N                                            | 0                                      | N                                   |
| MYO1B        | 0.549066132                            | N                                            | 2                                      | N                                   |
| PPIL6        | 0.549066132                            | N                                            | 0                                      | N                                   |
| SNHG24       | 0.549066132                            | N                                            | 0                                      | N                                   |
| TMEM130      | 0.549066132                            | N                                            | 0                                      | N                                   |
| AC106820.2   | 0.549338975                            | N                                            | 0                                      | N                                   |
| ARMC1        | 0.549338975                            | N                                            | 0                                      | N                                   |
| PSMA4        | 0.549338975                            | N                                            | 1                                      | N                                   |
| TM4SF1       | 0.549338975                            | N                                            | 3                                      | N                                   |
| PTENP1-AS    | 0.549646282                            | N                                            | 0                                      | N                                   |
| IGFBP6       | 0.549953726                            | N                                            | 85                                     | N                                   |
| NDUFB9       | 0.549953726                            | N                                            | 1                                      | N                                   |
| SPX          | 0.549953726                            | N                                            | 17                                     | N                                   |
| TLL1         | 0.549953726                            | N                                            | 0                                      | N                                   |
| YTHDF2       | 0.549953726                            | N                                            | 0                                      | N                                   |
| ZNF560       | 0.549953726                            | N                                            | 0                                      | N                                   |
| SLFNL1       | 0.55000634                             | N                                            | 0                                      | N                                   |
| BCAS3        | 0.550258296                            | N                                            | 0                                      | N                                   |
| KMT2E-AS1    | 0.550258296                            | N                                            | 0                                      | N                                   |
| AC007938.3   | 0.55029525                             | N                                            | 0                                      | N                                   |
| AC131280.1   | 0.55029525                             | N                                            | 0                                      | N                                   |
| AL136982.1   | 0.55029525                             | N                                            | 0                                      | N                                   |
| CBX3         | 0.55029525                             | N                                            | 0                                      | N                                   |
| FAM135A      | 0.55029525                             | N                                            | 0                                      | N                                   |
| HRAS         | 0.55029525                             | N                                            | 91                                     | N                                   |
| KLHL3        | 0.55029525                             | N                                            | 2                                      | N                                   |
| LRRC2        | 0.55029525                             | N                                            | 0                                      | N                                   |
| MRPS24       | 0.55029525                             | N                                            | 0                                      | N                                   |
| PROB1        | 0.55029525                             | N                                            | 0                                      | N                                   |
| BCAS2        | 0.55032371                             | N                                            | 0                                      | N                                   |
| AC098934.2   | 0.550372866                            | N                                            | 0                                      | N                                   |
| ANXA2P3      | 0.550372866                            | N                                            | 0                                      | N                                   |
| SLC23A2      | 0.55070082                             | N                                            | 0                                      | N                                   |
| ZNF343       | 0.55070082                             | N                                            | 0                                      | N                                   |
| CYSLTR1      | 0.550841341                            | N                                            | 0                                      | N                                   |
| EMC10        | 0.550841341                            | N                                            | 1                                      | N                                   |
| AC002456.1   | 0.550863294                            | N                                            | 0                                      | N                                   |
| AC005304.2   | 0.551250051                            | N                                            | 0                                      | N                                   |
| AL035411.1   | 0.551250051                            | N                                            | 0                                      | N                                   |
| KLF13        | 0.551250051                            | N                                            | 0                                      | N                                   |
| AL137222.1   | 0.551883722                            | N                                            | 0                                      | N                                   |
| HSPBAP1      | 0.551883722                            | N                                            | 0                                      | N                                   |
| TICAM2       | 0.551896071                            | N                                            | 0                                      | N                                   |
| PAQR4        | 0.551916297                            | N                                            | 0                                      | N                                   |
| PMF1-BGLAP   | 0.551991822                            | N                                            | 0                                      | N                                   |
| CTSW         | 0.55210897                             | N                                            | 0                                      | N                                   |
| AC097382.1   | 0.552202327                            | N                                            | 0                                      | N                                   |
| L3HYPDH      | 0.552202327                            | N                                            | 0                                      | N                                   |
| THAP11       | 0.552202327                            | N                                            | 0                                      | N                                   |
| AC006960.3   | 0.552460764                            | N                                            | 0                                      | N                                   |
| AC009812.4   | 0.552460764                            | N                                            | 0                                      | N                                   |
| AC114284.1   | 0.552460764                            | N                                            | 0                                      | N                                   |
| AC123769.2   | 0.552460764                            | N                                            | 0                                      | N                                   |
| ARMCX5       | 0.552460764                            | N                                            | 0                                      | N                                   |
| MECOM        | 0.552460764                            | N                                            | 1                                      | N                                   |
| MGME1        | 0.552460764                            | N                                            | 0                                      | N                                   |
| RFC4         | 0.552460764                            | N                                            | 3                                      | N                                   |
| RHBDD2       | 0.552460764                            | N                                            | 0                                      | N                                   |
| UBE2Q2       | 0.552460764                            | N                                            | 0                                      | N                                   |
| WDR76        | 0.552460764                            | N                                            | 1                                      | N                                   |
| GYS1         | 0.55263582                             | N                                            | 31                                     | N                                   |
| LINC02085    | 0.552759501                            | N                                            | 0                                      | N                                   |
| AL512590.3   | 0.552787847                            | N                                            | 0                                      | N                                   |
| ASS1P10      | 0.552794965                            | N                                            | 0                                      | N                                   |



| Gene symbols | FDR (differential expression analysis) | Differentially expressed gene? Y, Yes; N, No | Number of insulin related publications | Insulin related gene? Y, Yes; N, No |
|--------------|----------------------------------------|----------------------------------------------|----------------------------------------|-------------------------------------|
| LRRC34P1     | 0.552794965                            | N                                            | 0                                      | N                                   |
| RASD1        | 0.552794965                            | N                                            | 9                                      | N                                   |
| C5orf38      | 0.552868376                            | N                                            | 0                                      | N                                   |
| AP003499.1   | 0.552992307                            | N                                            | 0                                      | N                                   |
| MRT04        | 0.552992307                            | N                                            | 0                                      | N                                   |
| YBX3         | 0.552992307                            | N                                            | 1                                      | N                                   |
| AL390964.1   | 0.55323905                             | N                                            | 0                                      | N                                   |
| PRMT1P1      | 0.55323905                             | N                                            | 0                                      | N                                   |
| LINC01592    | 0.553348573                            | N                                            | 0                                      | N                                   |
| AC010329.2   | 0.553389308                            | N                                            | 0                                      | N                                   |
| BICRAL       | 0.553389308                            | N                                            | 0                                      | N                                   |
| GDPGP1       | 0.553389308                            | N                                            | 0                                      | N                                   |
| GNAO1        | 0.553389308                            | N                                            | 2                                      | N                                   |
| PRR22        | 0.553389308                            | N                                            | 0                                      | N                                   |
| ZNF197       | 0.553389308                            | N                                            | 0                                      | N                                   |
| C11orf84     | 0.553407925                            | N                                            | 0                                      | N                                   |
| EXOSC6       | 0.553407925                            | N                                            | 0                                      | N                                   |
| FDPSP1       | 0.553407925                            | N                                            | 0                                      | N                                   |
| NUTF2P7      | 0.553407925                            | N                                            | 0                                      | N                                   |
| RRP7BP       | 0.553407925                            | N                                            | 0                                      | N                                   |
| TFDP1        | 0.553510099                            | N                                            | 2                                      | N                                   |
| DCTN5        | 0.553573213                            | N                                            | 0                                      | N                                   |
| AC016831.5   | 0.553665435                            | N                                            | 0                                      | N                                   |
| FAM198B      | 0.553747435                            | N                                            | 0                                      | N                                   |
| TMEM79       | 0.553747435                            | N                                            | 1                                      | N                                   |
| BRSK1        | 0.553802488                            | N                                            | 1                                      | N                                   |
| RN7SL391P    | 0.55380808                             | N                                            | 0                                      | N                                   |
| VEZF1        | 0.553910691                            | N                                            | 6                                      | N                                   |
| GYG1P1       | 0.553956768                            | N                                            | 0                                      | N                                   |
| ORMDL3       | 0.553956768                            | N                                            | 2                                      | N                                   |
| PLEKHG7      | 0.553956768                            | N                                            | 0                                      | N                                   |
| TSHZ3        | 0.554000149                            | N                                            | 1                                      | N                                   |
| C1orf43      | 0.554187605                            | N                                            | 0                                      | N                                   |
| CBX3P1       | 0.554228852                            | N                                            | 0                                      | N                                   |
| CDKN2A       | 0.554228852                            | N                                            | 148                                    | Y                                   |
| IL11RA       | 0.554877773                            | N                                            | 3                                      | N                                   |
| C3orf70      | 0.555014571                            | N                                            | 0                                      | N                                   |
| CACFD1       | 0.555014571                            | N                                            | 0                                      | N                                   |
| EHBP1L1      | 0.555014571                            | N                                            | 0                                      | N                                   |
| MDFIC        | 0.555014571                            | N                                            | 0                                      | N                                   |
| NCBP2-AS2    | 0.555014571                            | N                                            | 0                                      | N                                   |
| TXLNGY       | 0.555014571                            | N                                            | 0                                      | N                                   |
| CDT1         | 0.555364527                            | N                                            | 0                                      | N                                   |
| ACAD9        | 0.555405305                            | N                                            | 0                                      | N                                   |
| ELOCP33      | 0.555405305                            | N                                            | 0                                      | N                                   |
| GS1-124K5.12 | 0.555405305                            | N                                            | 0                                      | N                                   |
| MXRA7        | 0.555405305                            | N                                            | 0                                      | N                                   |
| RPS27A       | 0.555405305                            | N                                            | 0                                      | N                                   |
| TPM1         | 0.555405305                            | N                                            | 3                                      | N                                   |
| AC022467.1   | 0.555427513                            | N                                            | 0                                      | N                                   |
| AC241585.1   | 0.555427513                            | N                                            | 0                                      | N                                   |
| AL078587.1   | 0.555427513                            | N                                            | 0                                      | N                                   |
| AL669818.1   | 0.555427513                            | N                                            | 0                                      | N                                   |
| PARVG        | 0.555427513                            | N                                            | 0                                      | N                                   |
| SLC25A21     | 0.555427513                            | N                                            | 0                                      | N                                   |
| AC024405.1   | 0.555526957                            | N                                            | 0                                      | N                                   |
| AC090948.2   | 0.555526957                            | N                                            | 0                                      | N                                   |
| ADAMTS12     | 0.555526957                            | N                                            | 0                                      | N                                   |
| KLK3         | 0.555526957                            | N                                            | 7                                      | N                                   |
| LINC00094    | 0.555526957                            | N                                            | 0                                      | N                                   |
| EXOSC9       | 0.555636895                            | N                                            | 0                                      | N                                   |
| AC087163.3   | 0.555717875                            | N                                            | 0                                      | N                                   |
| AL050343.1   | 0.555717875                            | N                                            | 0                                      | N                                   |
| C19orf35     | 0.555717875                            | N                                            | 0                                      | N                                   |
| CCDC152      | 0.555717875                            | N                                            | 0                                      | N                                   |
| ENSAP2       | 0.555717875                            | N                                            | 0                                      | N                                   |

| Gene symbols | FDR (differential expression analysis) | Differentially expressed gene? Y, Yes; N, No | Number of insulin related publications | Insulin related gene? Y, Yes; N, No |
|--------------|----------------------------------------|----------------------------------------------|----------------------------------------|-------------------------------------|
| GRAMD4       | 0.555717875                            | N                                            | 0                                      | N                                   |
| INE1         | 0.555717875                            | N                                            | 0                                      | N                                   |
| PIGS         | 0.555717875                            | N                                            | 1000                                   | Y                                   |
| PLBD2        | 0.555717875                            | N                                            | 0                                      | N                                   |
| RALY         | 0.555717875                            | N                                            | 2                                      | N                                   |
| STX1A        | 0.555717875                            | N                                            | 52                                     | N                                   |
| DDT          | 0.555857142                            | N                                            | 58                                     | N                                   |
| RPS20P20     | 0.556139853                            | N                                            | 0                                      | N                                   |
| NUDT5        | 0.556149605                            | N                                            | 0                                      | N                                   |
| SLC40A1      | 0.5564116                              | N                                            | 4                                      | N                                   |
| ZNF887P      | 0.5564116                              | N                                            | 0                                      | N                                   |
| AC009084.2   | 0.556610502                            | N                                            | 0                                      | N                                   |
| AL158801.4   | 0.556662697                            | N                                            | 0                                      | N                                   |
| AC016065.2   | 0.556716355                            | N                                            | 0                                      | N                                   |
| AP006222.1   | 0.556716355                            | N                                            | 0                                      | N                                   |
| MAMDC4       | 0.556716355                            | N                                            | 0                                      | N                                   |
| NUCB1        | 0.556716355                            | N                                            | 40                                     | N                                   |
| FAHD2CP      | 0.556717208                            | N                                            | 0                                      | N                                   |
| LPIN2        | 0.556717208                            | N                                            | 11                                     | N                                   |
| AC009119.2   | 0.556761223                            | N                                            | 0                                      | N                                   |
| AP002360.1   | 0.556761223                            | N                                            | 0                                      | N                                   |
| C16orf52     | 0.556761223                            | N                                            | 0                                      | N                                   |
| CKMT1A       | 0.556761223                            | N                                            | 0                                      | N                                   |
| PARP14       | 0.556761223                            | N                                            | 0                                      | N                                   |
| RAB40AL      | 0.556761223                            | N                                            | 0                                      | N                                   |
| RNF219       | 0.556761223                            | N                                            | 0                                      | N                                   |
| SNX2         | 0.556761223                            | N                                            | 1                                      | N                                   |
| TGIF2P1      | 0.556761223                            | N                                            | 0                                      | N                                   |
| AC016549.1   | 0.556800299                            | N                                            | 0                                      | N                                   |
| AC023632.2   | 0.556800299                            | N                                            | 0                                      | N                                   |
| AC093671.1   | 0.556800299                            | N                                            | 0                                      | N                                   |
| AKAP6        | 0.556800299                            | N                                            | 1                                      | N                                   |
| AL391416.1   | 0.556800299                            | N                                            | 0                                      | N                                   |
| ARMC10P1     | 0.556800299                            | N                                            | 0                                      | N                                   |
| CAMK2G       | 0.556800299                            | N                                            | 9                                      | N                                   |
| CASC4P1      | 0.556800299                            | N                                            | 0                                      | N                                   |
| CCDC171      | 0.556800299                            | N                                            | 0                                      | N                                   |
| CDC23        | 0.556800299                            | N                                            | 0                                      | N                                   |
| EGFL7        | 0.556800299                            | N                                            | 1                                      | N                                   |
| HLA-DQA1     | 0.556800299                            | N                                            | 165                                    | Y                                   |
| KATNBL1P4    | 0.556800299                            | N                                            | 0                                      | N                                   |
| KIAA1191     | 0.556800299                            | N                                            | 0                                      | N                                   |
| LOXL2        | 0.556800299                            | N                                            | 3                                      | N                                   |
| PRDM7        | 0.556800299                            | N                                            | 0                                      | N                                   |
| SLTM         | 0.556800299                            | N                                            | 0                                      | N                                   |
| STARD5       | 0.556800299                            | N                                            | 0                                      | N                                   |
| UCKL1-AS1    | 0.556800299                            | N                                            | 0                                      | N                                   |
| ZNF138       | 0.556800299                            | N                                            | 0                                      | N                                   |
| ZNF485       | 0.556800299                            | N                                            | 0                                      | N                                   |
| TDRD7        | 0.556958918                            | N                                            | 0                                      | N                                   |
| ELOCP19      | 0.556988502                            | N                                            | 0                                      | N                                   |
| GRIK3        | 0.556988502                            | N                                            | 0                                      | N                                   |
| RAET1G       | 0.556988502                            | N                                            | 0                                      | N                                   |
| EML6         | 0.55704219                             | N                                            | 0                                      | N                                   |
| TTC6         | 0.55704219                             | N                                            | 0                                      | N                                   |
| HOXA3        | 0.557244112                            | N                                            | 2                                      | N                                   |
| EIF31        | 0.558359895                            | N                                            | 1                                      | N                                   |
| GSS          | 0.558582631                            | N                                            | 15                                     | N                                   |
| MCAT         | 0.558582631                            | N                                            | 8                                      | N                                   |
| AC006965.1   | 0.558654844                            | N                                            | 0                                      | N                                   |
| RRP1         | 0.558755655                            | N                                            | 0                                      | N                                   |
| SLC6A15      | 0.558755655                            | N                                            | 2                                      | N                                   |
| AC016773.1   | 0.558835828                            | N                                            | 0                                      | N                                   |
| AC124947.2   | 0.558835828                            | N                                            | 0                                      | N                                   |
| UPF3AP2      | 0.558835828                            | N                                            | 0                                      | N                                   |
| AC003075.1   | 0.558847128                            | N                                            | 0                                      | N                                   |

| Gene symbols | FDR (differential expression analysis) | Differentially expressed gene? Y, Yes; N, No | Number of insulin related publications | Insulin related gene? Y, Yes; N, No |
|--------------|----------------------------------------|----------------------------------------------|----------------------------------------|-------------------------------------|
| AC112198.2   | 0.558847128                            | N                                            | 0                                      | N                                   |
| NMNAT3       | 0.558847128                            | N                                            | 2                                      | N                                   |
| SMARCA1      | 0.558847128                            | N                                            | 1                                      | N                                   |
| AC104619.3   | 0.55893811                             | N                                            | 0                                      | N                                   |
| AL359183.1   | 0.55893811                             | N                                            | 0                                      | N                                   |
| SNX29P2      | 0.55893811                             | N                                            | 0                                      | N                                   |
| AC005035.1   | 0.558986516                            | N                                            | 0                                      | N                                   |
| AC090607.2   | 0.558986516                            | N                                            | 0                                      | N                                   |
| AP005264.2   | 0.558986516                            | N                                            | 0                                      | N                                   |
| GNB1L        | 0.558986516                            | N                                            | 0                                      | N                                   |
| WISP1        | 0.558986516                            | N                                            | 27                                     | N                                   |
| LINC00543    | 0.559384854                            | N                                            | 0                                      | N                                   |
| PLN          | 0.559384854                            | N                                            | 29                                     | N                                   |
| AL121832.2   | 0.559829081                            | N                                            | 0                                      | N                                   |
| OR7A19P      | 0.559897                               | N                                            | 0                                      | N                                   |
| P4HA1        | 0.559897                               | N                                            | 4                                      | N                                   |
| ARL6IP5      | 0.559948517                            | N                                            | 2                                      | N                                   |
| HECW2        | 0.559948517                            | N                                            | 0                                      | N                                   |
| AC012186.3   | 0.560253835                            | N                                            | 0                                      | N                                   |
| AC098847.2   | 0.560253835                            | N                                            | 0                                      | N                                   |
| AL121839.2   | 0.560253835                            | N                                            | 0                                      | N                                   |
| AL357140.2   | 0.560253835                            | N                                            | 0                                      | N                                   |
| BMP2K        | 0.560253835                            | N                                            | 1                                      | N                                   |
| CDCA7L       | 0.560253835                            | N                                            | 0                                      | N                                   |
| GBP1         | 0.560253835                            | N                                            | 1                                      | N                                   |
| IFIH1        | 0.560253835                            | N                                            | 23                                     | N                                   |
| PWWP2A       | 0.560253835                            | N                                            | 0                                      | N                                   |
| FTO-IT1      | 0.56035255                             | N                                            | 0                                      | N                                   |
| AC016542.2   | 0.560407283                            | N                                            | 0                                      | N                                   |
| MBNL1        | 0.560407283                            | N                                            | 21                                     | N                                   |
| NPIP4        | 0.560407283                            | N                                            | 0                                      | N                                   |
| C20orf204    | 0.560415342                            | N                                            | 0                                      | N                                   |
| AC003685.2   | 0.560430431                            | N                                            | 0                                      | N                                   |
| AC104260.2   | 0.560430431                            | N                                            | 0                                      | N                                   |
| AC145676.1   | 0.560430431                            | N                                            | 0                                      | N                                   |
| AF111169.1   | 0.560430431                            | N                                            | 0                                      | N                                   |
| C22orf46     | 0.560430431                            | N                                            | 0                                      | N                                   |
| CBX3P2       | 0.560430431                            | N                                            | 0                                      | N                                   |
| CHTF8        | 0.560430431                            | N                                            | 0                                      | N                                   |
| E2F1         | 0.560430431                            | N                                            | 83                                     | N                                   |
| ESPN         | 0.560430431                            | N                                            | 0                                      | N                                   |
| GPR3         | 0.560430431                            | N                                            | 1                                      | N                                   |
| HS1BP3       | 0.560430431                            | N                                            | 0                                      | N                                   |
| HSD17B1      | 0.560430431                            | N                                            | 9                                      | N                                   |
| NPRL2        | 0.560430431                            | N                                            | 0                                      | N                                   |
| NRDC         | 0.560430431                            | N                                            | 1                                      | N                                   |
| PGBD1        | 0.560430431                            | N                                            | 0                                      | N                                   |
| SLC26A11     | 0.560430431                            | N                                            | 0                                      | N                                   |
| SNAP29       | 0.560430431                            | N                                            | 4                                      | N                                   |
| TM4SF18      | 0.560430431                            | N                                            | 0                                      | N                                   |
| DNLZ         | 0.560521703                            | N                                            | 0                                      | N                                   |
| F11R         | 0.560785414                            | N                                            | 4                                      | N                                   |
| KCNK2        | 0.560785414                            | N                                            | 1                                      | N                                   |
| PTGER2       | 0.560785414                            | N                                            | 5                                      | N                                   |
| TOB1         | 0.560785414                            | N                                            | 1                                      | N                                   |
| VWA3B        | 0.560785414                            | N                                            | 0                                      | N                                   |
| AL109811.2   | 0.560854902                            | N                                            | 0                                      | N                                   |
| PAQR6        | 0.560854902                            | N                                            | 0                                      | N                                   |
| AC027688.2   | 0.561005577                            | N                                            | 0                                      | N                                   |
| GGCX         | 0.561005577                            | N                                            | 3                                      | N                                   |
| VRK3         | 0.561191464                            | N                                            | 0                                      | N                                   |
| GON4L        | 0.561322546                            | N                                            | 0                                      | N                                   |
| FUBP3        | 0.561878035                            | N                                            | 1                                      | N                                   |
| FAM192A      | 0.56196045                             | N                                            | 0                                      | N                                   |
| GSPT2        | 0.56196045                             | N                                            | 0                                      | N                                   |
| ISCA1        | 0.561963552                            | N                                            | 0                                      | N                                   |

| Gene symbols | FDR (differential expression analysis) | Differentially expressed gene? Y, Yes; N, No | Number of insulin related publications | Insulin related gene? Y, Yes; N, No |
|--------------|----------------------------------------|----------------------------------------------|----------------------------------------|-------------------------------------|
| GLO1         | 0.562326455                            | N                                            | 29                                     | N                                   |
| EIF2B5       | 0.562476087                            | N                                            | 0                                      | N                                   |
| EEF1A1P22    | 0.562851579                            | N                                            | 0                                      | N                                   |
| GDF7         | 0.562851579                            | N                                            | 0                                      | N                                   |
| GS1-279B7.1  | 0.562851579                            | N                                            | 0                                      | N                                   |
| KARS         | 0.562851579                            | N                                            | 15                                     | N                                   |
| LINC02076    | 0.562851579                            | N                                            | 0                                      | N                                   |
| MSH4         | 0.562851579                            | N                                            | 1                                      | N                                   |
| MYRF         | 0.562851579                            | N                                            | 1                                      | N                                   |
| PPP1R35      | 0.562851579                            | N                                            | 0                                      | N                                   |
| YJEFN3       | 0.562851579                            | N                                            | 0                                      | N                                   |
| UBAP2L       | 0.563397499                            | N                                            | 0                                      | N                                   |
| ANKRD63      | 0.563425258                            | N                                            | 0                                      | N                                   |
| CD46         | 0.563425258                            | N                                            | 36                                     | N                                   |
| RIPK2        | 0.563425258                            | N                                            | 12                                     | N                                   |
| RTEL1P1      | 0.563425258                            | N                                            | 0                                      | N                                   |
| EXT1         | 0.563524927                            | N                                            | 2                                      | N                                   |
| KIAA1586     | 0.563524927                            | N                                            | 0                                      | N                                   |
| PROX2        | 0.563524927                            | N                                            | 0                                      | N                                   |
| SNHG15       | 0.563524927                            | N                                            | 0                                      | N                                   |
| ELK2BP       | 0.563528821                            | N                                            | 0                                      | N                                   |
| C2orf27A     | 0.563555982                            | N                                            | 0                                      | N                                   |
| AC008840.1   | 0.563766088                            | N                                            | 0                                      | N                                   |
| AC008870.2   | 0.563766088                            | N                                            | 0                                      | N                                   |
| AL450487.1   | 0.563766088                            | N                                            | 0                                      | N                                   |
| DUSP8P5      | 0.563766088                            | N                                            | 0                                      | N                                   |
| FAT1         | 0.563766088                            | N                                            | 8                                      | N                                   |
| ISPD         | 0.563766088                            | N                                            | 0                                      | N                                   |
| LINC01016    | 0.563766088                            | N                                            | 0                                      | N                                   |
| CNIH2        | 0.56385387                             | N                                            | 0                                      | N                                   |
| POLD2P1      | 0.56385387                             | N                                            | 0                                      | N                                   |
| ZHX3         | 0.563912207                            | N                                            | 2                                      | N                                   |
| FNDC5        | 0.564005799                            | N                                            | 191                                    | Y                                   |
| UNC5C        | 0.564020501                            | N                                            | 5                                      | N                                   |
| AC011477.4   | 0.564085474                            | N                                            | 0                                      | N                                   |
| CRISPLD2     | 0.564085474                            | N                                            | 2                                      | N                                   |
| EPB41L1      | 0.564085474                            | N                                            | 0                                      | N                                   |
| GPR35        | 0.564085474                            | N                                            | 2                                      | N                                   |
| HIST1H4J     | 0.564085474                            | N                                            | 0                                      | N                                   |
| PSMD1        | 0.564085474                            | N                                            | 0                                      | N                                   |
| TMEM150C     | 0.564085474                            | N                                            | 0                                      | N                                   |
| CGB7         | 0.564355802                            | N                                            | 0                                      | N                                   |
| CTBP2P6      | 0.564356662                            | N                                            | 0                                      | N                                   |
| AL022341.1   | 0.564531274                            | N                                            | 0                                      | N                                   |
| ABCD2        | 0.564588134                            | N                                            | 5                                      | N                                   |
| AIFM1        | 0.564588134                            | N                                            | 4                                      | N                                   |
| AKAP1        | 0.564588134                            | N                                            | 3                                      | N                                   |
| CYC1         | 0.564588134                            | N                                            | 8                                      | N                                   |
| SEN3-EIF4A1  | 0.564588134                            | N                                            | 0                                      | N                                   |
| WASHC2C      | 0.564588134                            | N                                            | 0                                      | N                                   |
| WDR53        | 0.564588134                            | N                                            | 0                                      | N                                   |
| AL445222.1   | 0.564670414                            | N                                            | 0                                      | N                                   |
| ST8SIA4      | 0.564670414                            | N                                            | 0                                      | N                                   |
| MIR155HG     | 0.564791586                            | N                                            | 0                                      | N                                   |
| SMC6         | 0.56499196                             | N                                            | 2                                      | N                                   |
| NDUFAF6      | 0.565093285                            | N                                            | 0                                      | N                                   |
| AC112484.4   | 0.565144176                            | N                                            | 0                                      | N                                   |
| LINC01102    | 0.565599874                            | N                                            | 0                                      | N                                   |
| TRIM11       | 0.565599874                            | N                                            | 0                                      | N                                   |
| AC091805.1   | 0.565731769                            | N                                            | 0                                      | N                                   |
| ITGA10       | 0.565756181                            | N                                            | 0                                      | N                                   |
| AC026316.3   | 0.565769705                            | N                                            | 0                                      | N                                   |
| ACBD3        | 0.565777929                            | N                                            | 1                                      | N                                   |
| MZT2A        | 0.565777929                            | N                                            | 0                                      | N                                   |
| CNN2         | 0.565859947                            | N                                            | 1                                      | N                                   |
| AGMO         | 0.565910887                            | N                                            | 2                                      | N                                   |

| Gene symbols | FDR (differential expression analysis) | Differentially expressed gene? Y, Yes; N, No | Number of insulin related publications | Insulin related gene? Y, Yes; N, No |
|--------------|----------------------------------------|----------------------------------------------|----------------------------------------|-------------------------------------|
| AL512504.2   | 0.565910887                            | N                                            | 0                                      | N                                   |
| CSPG4        | 0.565910887                            | N                                            | 4                                      | N                                   |
| MRPS9        | 0.565910887                            | N                                            | 0                                      | N                                   |
| TARSL2       | 0.565910887                            | N                                            | 0                                      | N                                   |
| INTS13       | 0.565952692                            | N                                            | 0                                      | N                                   |
| PANK3        | 0.565952692                            | N                                            | 0                                      | N                                   |
| HOMEZ        | 0.566255225                            | N                                            | 0                                      | N                                   |
| NUP43        | 0.566255225                            | N                                            | 0                                      | N                                   |
| RPS23P8      | 0.566255225                            | N                                            | 0                                      | N                                   |
| AL354732.1   | 0.566551956                            | N                                            | 0                                      | N                                   |
| COA7         | 0.566657443                            | N                                            | 0                                      | N                                   |
| AC024940.5   | 0.566904837                            | N                                            | 0                                      | N                                   |
| AC041040.2   | 0.566904837                            | N                                            | 0                                      | N                                   |
| LIPC         | 0.566904837                            | N                                            | 29                                     | N                                   |
| Z82206.1     | 0.566904837                            | N                                            | 0                                      | N                                   |
| FAM160B1     | 0.566921698                            | N                                            | 0                                      | N                                   |
| NIP7         | 0.566921698                            | N                                            | 0                                      | N                                   |
| AC010328.2   | 0.56722313                             | N                                            | 0                                      | N                                   |
| AC092106.2   | 0.56722313                             | N                                            | 0                                      | N                                   |
| AC136475.4   | 0.56722313                             | N                                            | 0                                      | N                                   |
| LYSMD4       | 0.56722313                             | N                                            | 0                                      | N                                   |
| TTC31        | 0.56722313                             | N                                            | 0                                      | N                                   |
| ZNF490       | 0.56722313                             | N                                            | 0                                      | N                                   |
| AC027575.2   | 0.567352377                            | N                                            | 0                                      | N                                   |
| DNASE1L2     | 0.567352377                            | N                                            | 0                                      | N                                   |
| HTR7P1       | 0.567352377                            | N                                            | 0                                      | N                                   |
| AC108734.3   | 0.567376914                            | N                                            | 0                                      | N                                   |
| AC138907.8   | 0.567376914                            | N                                            | 0                                      | N                                   |
| AL589993.1   | 0.567376914                            | N                                            | 0                                      | N                                   |
| BCL2L11      | 0.567376914                            | N                                            | 45                                     | N                                   |
| CCDC168      | 0.567376914                            | N                                            | 0                                      | N                                   |
| CYP2R1       | 0.567376914                            | N                                            | 11                                     | N                                   |
| FLJ31356     | 0.567376914                            | N                                            | 0                                      | N                                   |
| HLA-G        | 0.567376914                            | N                                            | 18                                     | N                                   |
| SET          | 0.567376914                            | N                                            | 1000                                   | Y                                   |
| STX7         | 0.567493381                            | N                                            | 0                                      | N                                   |
| AL096828.2   | 0.567650517                            | N                                            | 0                                      | N                                   |
| PABPN1       | 0.567650517                            | N                                            | 1                                      | N                                   |
| AL080276.2   | 0.567772473                            | N                                            | 0                                      | N                                   |
| AC245060.6   | 0.567791699                            | N                                            | 0                                      | N                                   |
| GPATCH3      | 0.567791699                            | N                                            | 0                                      | N                                   |
| MGAT4EP      | 0.567791699                            | N                                            | 0                                      | N                                   |
| NOL11        | 0.567791699                            | N                                            | 0                                      | N                                   |
| OFD1         | 0.567791699                            | N                                            | 1                                      | N                                   |
| RN7SL375P    | 0.567791699                            | N                                            | 0                                      | N                                   |
| ZNF211       | 0.567791699                            | N                                            | 0                                      | N                                   |
| ZNF32        | 0.567791699                            | N                                            | 0                                      | N                                   |
| AC023154.1   | 0.567854168                            | N                                            | 0                                      | N                                   |
| SLC25A12     | 0.568133238                            | N                                            | 6                                      | N                                   |
| LINC00954    | 0.568222445                            | N                                            | 0                                      | N                                   |
| AC007389.3   | 0.568284607                            | N                                            | 0                                      | N                                   |
| PTCD2P1      | 0.568295632                            | N                                            | 0                                      | N                                   |
| AC004585.1   | 0.568483018                            | N                                            | 0                                      | N                                   |
| AC087481.3   | 0.568483018                            | N                                            | 0                                      | N                                   |
| NR2E3        | 0.568483018                            | N                                            | 2                                      | N                                   |
| LGALS3BP     | 0.568571322                            | N                                            | 7                                      | N                                   |
| NAGK         | 0.568571322                            | N                                            | 1                                      | N                                   |
| NT5DC2       | 0.568783035                            | N                                            | 0                                      | N                                   |
| HPS4         | 0.568918181                            | N                                            | 1                                      | N                                   |
| NDUFB6       | 0.568918181                            | N                                            | 9                                      | N                                   |
| SLC44A3-AS1  | 0.568918181                            | N                                            | 0                                      | N                                   |
| MICAL2       | 0.569024629                            | N                                            | 0                                      | N                                   |
| AC009120.2   | 0.569057913                            | N                                            | 0                                      | N                                   |
| AC093155.2   | 0.569057913                            | N                                            | 0                                      | N                                   |
| AC253536.6   | 0.569057913                            | N                                            | 0                                      | N                                   |
| AKAP3        | 0.569057913                            | N                                            | 0                                      | N                                   |

| Gene symbols  | FDR (differential expression analysis) | Differentially expressed gene? Y, Yes; N, No | Number of insulin related publications | Insulin related gene? Y, Yes; N, No |
|---------------|----------------------------------------|----------------------------------------------|----------------------------------------|-------------------------------------|
| ARRB2         | 0.569057913                            | N                                            | 17                                     | N                                   |
| ARRDC1-AS1    | 0.569057913                            | N                                            | 0                                      | N                                   |
| CCBE1         | 0.569057913                            | N                                            | 1                                      | N                                   |
| CLN3          | 0.569057913                            | N                                            | 4                                      | N                                   |
| CPZ           | 0.569057913                            | N                                            | 16                                     | N                                   |
| CTC-786C10.1  | 0.569057913                            | N                                            | 0                                      | N                                   |
| GADD45GIP1    | 0.569057913                            | N                                            | 1                                      | N                                   |
| GM2AP1        | 0.569057913                            | N                                            | 0                                      | N                                   |
| LINC01268     | 0.569057913                            | N                                            | 0                                      | N                                   |
| LTBR          | 0.569057913                            | N                                            | 13                                     | N                                   |
| NCOA7         | 0.569057913                            | N                                            | 0                                      | N                                   |
| NR1I3         | 0.569057913                            | N                                            | 8                                      | N                                   |
| OXNAD1        | 0.569057913                            | N                                            | 0                                      | N                                   |
| PWAR1         | 0.569057913                            | N                                            | 0                                      | N                                   |
| RN7SL809P     | 0.569057913                            | N                                            | 0                                      | N                                   |
| TRIM69        | 0.569057913                            | N                                            | 1                                      | N                                   |
| TXNDC5        | 0.569057913                            | N                                            | 4                                      | N                                   |
| ZNF264        | 0.569057913                            | N                                            | 0                                      | N                                   |
| ZNF296        | 0.569057913                            | N                                            | 0                                      | N                                   |
| ZNF583        | 0.569057913                            | N                                            | 0                                      | N                                   |
| TNKS1BP1      | 0.569065272                            | N                                            | 1                                      | N                                   |
| ZNF608        | 0.569065272                            | N                                            | 1                                      | N                                   |
| ADAMTS9-AS2   | 0.569214479                            | N                                            | 0                                      | N                                   |
| AC005540.1    | 0.569498921                            | N                                            | 0                                      | N                                   |
| AC011379.2    | 0.569498921                            | N                                            | 0                                      | N                                   |
| AC024568.1    | 0.569498921                            | N                                            | 0                                      | N                                   |
| AC145285.7    | 0.569498921                            | N                                            | 0                                      | N                                   |
| CCDC74B       | 0.569498921                            | N                                            | 0                                      | N                                   |
| EFTUD2        | 0.569498921                            | N                                            | 0                                      | N                                   |
| GRIN2B        | 0.569498921                            | N                                            | 3                                      | N                                   |
| MRPL48P1      | 0.569498921                            | N                                            | 0                                      | N                                   |
| NBR1          | 0.569498921                            | N                                            | 3                                      | N                                   |
| DNTTIP2       | 0.569632422                            | N                                            | 0                                      | N                                   |
| EXO1          | 0.569632422                            | N                                            | 1                                      | N                                   |
| FTCD          | 0.569632422                            | N                                            | 0                                      | N                                   |
| SMO           | 0.569632422                            | N                                            | 33                                     | N                                   |
| AL109766.1    | 0.569717497                            | N                                            | 0                                      | N                                   |
| AP000974.1    | 0.569717497                            | N                                            | 0                                      | N                                   |
| AC009148.1    | 0.569793266                            | N                                            | 0                                      | N                                   |
| AC011477.1    | 0.569793266                            | N                                            | 0                                      | N                                   |
| AC011978.1    | 0.569793266                            | N                                            | 0                                      | N                                   |
| AC073896.1    | 0.569793266                            | N                                            | 0                                      | N                                   |
| AC091799.1    | 0.569793266                            | N                                            | 0                                      | N                                   |
| AC114980.1    | 0.569793266                            | N                                            | 0                                      | N                                   |
| AC138150.2    | 0.569793266                            | N                                            | 0                                      | N                                   |
| APIP          | 0.569793266                            | N                                            | 0                                      | N                                   |
| BICD1         | 0.569793266                            | N                                            | 0                                      | N                                   |
| BRCC3P1       | 0.569793266                            | N                                            | 0                                      | N                                   |
| CARMIL1       | 0.569793266                            | N                                            | 0                                      | N                                   |
| CEBPB         | 0.569793266                            | N                                            | 37                                     | N                                   |
| COL9A1        | 0.569793266                            | N                                            | 3                                      | N                                   |
| CTD-3138B18.4 | 0.569793266                            | N                                            | 0                                      | N                                   |
| EFL1          | 0.569793266                            | N                                            | 0                                      | N                                   |
| FSIP2         | 0.569793266                            | N                                            | 0                                      | N                                   |
| GSTM3         | 0.569793266                            | N                                            | 4                                      | N                                   |
| KCNJ13        | 0.569793266                            | N                                            | 1                                      | N                                   |
| NLE1          | 0.569793266                            | N                                            | 2                                      | N                                   |
| ODC1          | 0.569793266                            | N                                            | 2                                      | N                                   |
| PHF2          | 0.569793266                            | N                                            | 1                                      | N                                   |
| PUSL1         | 0.569793266                            | N                                            | 0                                      | N                                   |
| PVR           | 0.569793266                            | N                                            | 27                                     | N                                   |
| RNF217-AS1    | 0.569793266                            | N                                            | 0                                      | N                                   |
| SCFD1         | 0.569793266                            | N                                            | 0                                      | N                                   |
| SKA2P1        | 0.569793266                            | N                                            | 0                                      | N                                   |
| TSEN54        | 0.569793266                            | N                                            | 0                                      | N                                   |
| UBE3A         | 0.569793266                            | N                                            | 5                                      | N                                   |

| Gene symbols | FDR (differential expression analysis) | Differentially expressed gene? Y, Yes; N, No | Number of insulin related publications | Insulin related gene? Y, Yes; N, No |
|--------------|----------------------------------------|----------------------------------------------|----------------------------------------|-------------------------------------|
| WNT6         | 0.569793266                            | N                                            | 4                                      | N                                   |
| WWC3         | 0.569793266                            | N                                            | 0                                      | N                                   |
| ZHX1         | 0.569793266                            | N                                            | 0                                      | N                                   |
| AL136295.7   | 0.569994059                            | N                                            | 0                                      | N                                   |
| GPX8         | 0.569994059                            | N                                            | 5                                      | N                                   |
| AC093752.1   | 0.570130227                            | N                                            | 0                                      | N                                   |
| AL158163.1   | 0.570130227                            | N                                            | 0                                      | N                                   |
| COL4A5       | 0.570130227                            | N                                            | 2                                      | N                                   |
| COMP         | 0.570130227                            | N                                            | 1000                                   | Y                                   |
| DOCK6        | 0.570130227                            | N                                            | 0                                      | N                                   |
| FZD9         | 0.570130227                            | N                                            | 2                                      | N                                   |
| HSD17B6      | 0.570130227                            | N                                            | 4                                      | N                                   |
| IMPDH1P10    | 0.570130227                            | N                                            | 0                                      | N                                   |
| LDHB         | 0.570130227                            | N                                            | 7                                      | N                                   |
| MIR762HG     | 0.570130227                            | N                                            | 0                                      | N                                   |
| SEC61A1      | 0.570130227                            | N                                            | 3                                      | N                                   |
| SNORD15B     | 0.570130227                            | N                                            | 0                                      | N                                   |
| UTP18        | 0.570130227                            | N                                            | 0                                      | N                                   |
| ZNF189       | 0.570130227                            | N                                            | 0                                      | N                                   |
| ZNF790       | 0.570130227                            | N                                            | 0                                      | N                                   |
| AL590705.1   | 0.570220934                            | N                                            | 0                                      | N                                   |
| FAM210B      | 0.570220934                            | N                                            | 0                                      | N                                   |
| MPPE1P1      | 0.570220934                            | N                                            | 0                                      | N                                   |
| ATP5J2P5     | 0.570232264                            | N                                            | 0                                      | N                                   |
| SLC31A1P1    | 0.570232264                            | N                                            | 0                                      | N                                   |
| FBXO42       | 0.570259586                            | N                                            | 0                                      | N                                   |
| PTPRH        | 0.570304104                            | N                                            | 1                                      | N                                   |
| ZNF425       | 0.570304104                            | N                                            | 0                                      | N                                   |
| AC232271.1   | 0.570783413                            | N                                            | 0                                      | N                                   |
| NLRP14       | 0.57079723                             | N                                            | 0                                      | N                                   |
| AC024940.3   | 0.570808599                            | N                                            | 0                                      | N                                   |
| ADIRF-AS1    | 0.570808599                            | N                                            | 0                                      | N                                   |
| SPEF1        | 0.570808599                            | N                                            | 0                                      | N                                   |
| TNP2         | 0.570808599                            | N                                            | 1                                      | N                                   |
| ATP1A1-AS1   | 0.570866612                            | N                                            | 0                                      | N                                   |
| CTSZ         | 0.570866612                            | N                                            | 1                                      | N                                   |
| MTAPP2       | 0.570866612                            | N                                            | 0                                      | N                                   |
| AUNIP        | 0.570942294                            | N                                            | 0                                      | N                                   |
| GLUD2        | 0.570942294                            | N                                            | 2                                      | N                                   |
| AC093519.1   | 0.570945119                            | N                                            | 0                                      | N                                   |
| AL683842.1   | 0.570945119                            | N                                            | 0                                      | N                                   |
| COG2         | 0.570945119                            | N                                            | 0                                      | N                                   |
| OR7M1P       | 0.570945119                            | N                                            | 0                                      | N                                   |
| PASK         | 0.571150859                            | N                                            | 36                                     | N                                   |
| AC244196.3   | 0.571220492                            | N                                            | 0                                      | N                                   |
| HTATSF1      | 0.571469229                            | N                                            | 1                                      | N                                   |
| LINC01483    | 0.571469229                            | N                                            | 0                                      | N                                   |
| SLF1         | 0.571469229                            | N                                            | 0                                      | N                                   |
| ZNF692       | 0.571469229                            | N                                            | 1                                      | N                                   |
| PRELID3BP1   | 0.571592962                            | N                                            | 0                                      | N                                   |
| AP004242.1   | 0.571849121                            | N                                            | 0                                      | N                                   |
| SARNP        | 0.572274531                            | N                                            | 0                                      | N                                   |
| BLOC1S1      | 0.57229863                             | N                                            | 0                                      | N                                   |
| LEPR         | 0.57229863                             | N                                            | 364                                    | Y                                   |
| RAP2A        | 0.57229863                             | N                                            | 1                                      | N                                   |
| RNF168       | 0.57229863                             | N                                            | 0                                      | N                                   |
| SLC26A2      | 0.57229863                             | N                                            | 1                                      | N                                   |
| SS18L2       | 0.57229863                             | N                                            | 0                                      | N                                   |
| ZNF542P      | 0.57229863                             | N                                            | 0                                      | N                                   |
| FAM182B      | 0.572529983                            | N                                            | 0                                      | N                                   |
| IGFBP7-AS1   | 0.572563997                            | N                                            | 0                                      | N                                   |
| NNT-AS1      | 0.572563997                            | N                                            | 0                                      | N                                   |
| PRODH        | 0.572563997                            | N                                            | 2                                      | N                                   |
| LINC01149    | 0.572663123                            | N                                            | 0                                      | N                                   |
| PTGIR        | 0.572663123                            | N                                            | 2                                      | N                                   |
| LINC01578    | 0.572879944                            | N                                            | 0                                      | N                                   |

| Gene symbols | FDR (differential expression analysis) | Differentially expressed gene? Y, Yes; N, No | Number of insulin related publications | Insulin related gene? Y, Yes; N, No |
|--------------|----------------------------------------|----------------------------------------------|----------------------------------------|-------------------------------------|
| MESP1        | 0.572937925                            | N                                            | 5                                      | N                                   |
| PSMD4        | 0.572937925                            | N                                            | 1                                      | N                                   |
| STK38L       | 0.573002322                            | N                                            | 1                                      | N                                   |
| SAP30BP      | 0.573428852                            | N                                            | 0                                      | N                                   |
| AC022558.2   | 0.573528294                            | N                                            | 0                                      | N                                   |
| ERG28        | 0.573744322                            | N                                            | 0                                      | N                                   |
| CTHRC1       | 0.573748541                            | N                                            | 3                                      | N                                   |
| PLPP2        | 0.573748541                            | N                                            | 1                                      | N                                   |
| TET1         | 0.573748541                            | N                                            | 15                                     | N                                   |
| AC006195.1   | 0.573911392                            | N                                            | 0                                      | N                                   |
| AC019097.1   | 0.573911392                            | N                                            | 0                                      | N                                   |
| BTN3A1       | 0.573911392                            | N                                            | 0                                      | N                                   |
| CD248        | 0.573911392                            | N                                            | 2                                      | N                                   |
| CLU1         | 0.573911392                            | N                                            | 0                                      | N                                   |
| EEF1E1P1     | 0.573911392                            | N                                            | 0                                      | N                                   |
| POLH         | 0.573911392                            | N                                            | 0                                      | N                                   |
| POT1         | 0.573911392                            | N                                            | 2                                      | N                                   |
| TMCC2        | 0.573911392                            | N                                            | 0                                      | N                                   |
| VPS29        | 0.573911392                            | N                                            | 1                                      | N                                   |
| EYS          | 0.574214872                            | N                                            | 8                                      | N                                   |
| ZNF286B      | 0.574214872                            | N                                            | 0                                      | N                                   |
| PDCD5P2      | 0.574344115                            | N                                            | 0                                      | N                                   |
| AC034198.2   | 0.574355975                            | N                                            | 0                                      | N                                   |
| TPM3P9       | 0.574355975                            | N                                            | 0                                      | N                                   |
| HIST1H2BM    | 0.574433816                            | N                                            | 0                                      | N                                   |
| PDGFRL       | 0.574474699                            | N                                            | 1                                      | N                                   |
| ARL6IP6      | 0.574638352                            | N                                            | 0                                      | N                                   |
| CCDC74A      | 0.574638352                            | N                                            | 0                                      | N                                   |
| MRPL37       | 0.574825902                            | N                                            | 0                                      | N                                   |
| SLA          | 0.574825902                            | N                                            | 12                                     | N                                   |
| MAN1A1       | 0.574913036                            | N                                            | 1                                      | N                                   |
| AC017002.1   | 0.574926714                            | N                                            | 0                                      | N                                   |
| DECR2        | 0.574926714                            | N                                            | 0                                      | N                                   |
| GAR1         | 0.574926714                            | N                                            | 0                                      | N                                   |
| MPP6         | 0.574926714                            | N                                            | 0                                      | N                                   |
| RBM12B       | 0.574926714                            | N                                            | 0                                      | N                                   |
| SLC10A5      | 0.574926714                            | N                                            | 0                                      | N                                   |
| BRCC3        | 0.575195725                            | N                                            | 0                                      | N                                   |
| LINC01415    | 0.575264646                            | N                                            | 0                                      | N                                   |
| GOLGA2P10    | 0.575394694                            | N                                            | 0                                      | N                                   |
| HIST1H2BI    | 0.575394694                            | N                                            | 0                                      | N                                   |
| QRSLIP3      | 0.575394694                            | N                                            | 0                                      | N                                   |
| RPLP1        | 0.575394694                            | N                                            | 1                                      | N                                   |
| KLHL12       | 0.575606631                            | N                                            | 0                                      | N                                   |
| VSTM2A       | 0.575606631                            | N                                            | 0                                      | N                                   |
| FGF2         | 0.575620709                            | N                                            | 1000                                   | Y                                   |
| Z82217.1     | 0.575649372                            | N                                            | 0                                      | N                                   |
| FAM53C       | 0.576096512                            | N                                            | 0                                      | N                                   |
| AL157384.1   | 0.576133827                            | N                                            | 0                                      | N                                   |
| BARX2        | 0.576138391                            | N                                            | 0                                      | N                                   |
| TMSB4XP2     | 0.576138391                            | N                                            | 0                                      | N                                   |
| NEDD1        | 0.576222417                            | N                                            | 0                                      | N                                   |
| THRAP3       | 0.576222417                            | N                                            | 2                                      | N                                   |
| AC079416.1   | 0.576249308                            | N                                            | 0                                      | N                                   |
| AC128685.1   | 0.576249308                            | N                                            | 0                                      | N                                   |
| COL9A2       | 0.576249308                            | N                                            | 1                                      | N                                   |
| HCN4         | 0.576249308                            | N                                            | 9                                      | N                                   |
| HNRNPA3P1    | 0.576249308                            | N                                            | 0                                      | N                                   |
| AC023043.1   | 0.576266848                            | N                                            | 0                                      | N                                   |
| AL096870.1   | 0.576266848                            | N                                            | 0                                      | N                                   |
| AP001636.2   | 0.576266848                            | N                                            | 0                                      | N                                   |
| ATF7         | 0.576266848                            | N                                            | 2                                      | N                                   |
| FAM166A      | 0.576266848                            | N                                            | 0                                      | N                                   |
| GDA          | 0.576266848                            | N                                            | 65                                     | N                                   |
| LINC00343    | 0.576266848                            | N                                            | 0                                      | N                                   |
| TRMT10A      | 0.576266848                            | N                                            | 5                                      | N                                   |



| Gene symbols | FDR (differential expression analysis) | Differentially expressed gene? Y, Yes; N, No | Number of insulin related publications | Insulin related gene? Y, Yes; N, No |
|--------------|----------------------------------------|----------------------------------------------|----------------------------------------|-------------------------------------|
| ZNF674-AS1   | 0.576266848                            | N                                            | 0                                      | N                                   |
| RAB23        | 0.576325827                            | N                                            | 1                                      | N                                   |
| SH3KBP1      | 0.576339494                            | N                                            | 3                                      | N                                   |
| CALN1        | 0.576411047                            | N                                            | 0                                      | N                                   |
| CRYGS        | 0.576411047                            | N                                            | 0                                      | N                                   |
| HDX          | 0.576411047                            | N                                            | 19                                     | N                                   |
| WDTC1        | 0.576411047                            | N                                            | 2                                      | N                                   |
| AC087457.1   | 0.576421264                            | N                                            | 0                                      | N                                   |
| AL035665.1   | 0.576507914                            | N                                            | 0                                      | N                                   |
| SYN2         | 0.576580341                            | N                                            | 3                                      | N                                   |
| ZMYND12      | 0.576647232                            | N                                            | 0                                      | N                                   |
| HHIP-AS1     | 0.576686345                            | N                                            | 0                                      | N                                   |
| HIST1H2BH    | 0.576686345                            | N                                            | 0                                      | N                                   |
| LRRC70       | 0.576686345                            | N                                            | 0                                      | N                                   |
| WDR19        | 0.576686345                            | N                                            | 0                                      | N                                   |
| AC124067.2   | 0.576713663                            | N                                            | 0                                      | N                                   |
| AC132938.3   | 0.576713663                            | N                                            | 0                                      | N                                   |
| AIPL1        | 0.576713663                            | N                                            | 1                                      | N                                   |
| EFEMP1       | 0.576778353                            | N                                            | 6                                      | N                                   |
| CNN2P1       | 0.576830965                            | N                                            | 0                                      | N                                   |
| HNRNPA1L2    | 0.576830965                            | N                                            | 0                                      | N                                   |
| TMEM184B     | 0.576830965                            | N                                            | 0                                      | N                                   |
| TRGV9        | 0.576830965                            | N                                            | 0                                      | N                                   |
| AC022929.2   | 0.576958298                            | N                                            | 0                                      | N                                   |
| ELOA3        | 0.576958298                            | N                                            | 0                                      | N                                   |
| AC025031.5   | 0.577069475                            | N                                            | 0                                      | N                                   |
| AL031775.1   | 0.577147654                            | N                                            | 0                                      | N                                   |
| BCLAF3       | 0.577147654                            | N                                            | 0                                      | N                                   |
| MRPL40       | 0.577147654                            | N                                            | 0                                      | N                                   |
| RFLNA        | 0.577147654                            | N                                            | 0                                      | N                                   |
| MBLAC2       | 0.577181685                            | N                                            | 0                                      | N                                   |
| PPAN         | 0.577181685                            | N                                            | 0                                      | N                                   |
| PRR5         | 0.577181685                            | N                                            | 2                                      | N                                   |
| SPAG4        | 0.577181685                            | N                                            | 0                                      | N                                   |
| BLACE        | 0.577244605                            | N                                            | 0                                      | N                                   |
| C18orf8      | 0.577244605                            | N                                            | 0                                      | N                                   |
| EXOSC3P2     | 0.577244605                            | N                                            | 0                                      | N                                   |
| SLC35A4      | 0.577303006                            | N                                            | 0                                      | N                                   |
| UBE2Z        | 0.577419265                            | N                                            | 0                                      | N                                   |
| AC012454.1   | 0.57746021                             | N                                            | 0                                      | N                                   |
| AC131254.1   | 0.577545978                            | N                                            | 0                                      | N                                   |
| ANKRD28      | 0.577545978                            | N                                            | 1                                      | N                                   |
| ESRRG        | 0.577545978                            | N                                            | 13                                     | N                                   |
| GPR108       | 0.577545978                            | N                                            | 0                                      | N                                   |
| ID1          | 0.577545978                            | N                                            | 39                                     | N                                   |
| NME1         | 0.577545978                            | N                                            | 7                                      | N                                   |
| RAD51D       | 0.577545978                            | N                                            | 0                                      | N                                   |
| STAMBP       | 0.577545978                            | N                                            | 1                                      | N                                   |
| TRO          | 0.577545978                            | N                                            | 34                                     | N                                   |
| AC092393.1   | 0.577617112                            | N                                            | 0                                      | N                                   |
| WDR45BP1     | 0.577886458                            | N                                            | 0                                      | N                                   |
| MRPL12       | 0.578023233                            | N                                            | 0                                      | N                                   |
| AC009275.1   | 0.578131821                            | N                                            | 0                                      | N                                   |
| AC135586.2   | 0.578131821                            | N                                            | 0                                      | N                                   |
| AKAP13       | 0.578131821                            | N                                            | 0                                      | N                                   |
| DZIP1L       | 0.578131821                            | N                                            | 0                                      | N                                   |
| GVQW2        | 0.578131821                            | N                                            | 0                                      | N                                   |
| NOTCH3       | 0.578131821                            | N                                            | 10                                     | N                                   |
| PFN1P9       | 0.578131821                            | N                                            | 0                                      | N                                   |
| SYNRG        | 0.578131821                            | N                                            | 0                                      | N                                   |
| AC074032.1   | 0.578438411                            | N                                            | 0                                      | N                                   |
| AC133550.2   | 0.578438411                            | N                                            | 0                                      | N                                   |
| COA5         | 0.578438411                            | N                                            | 0                                      | N                                   |
| LYNX1        | 0.578438411                            | N                                            | 0                                      | N                                   |
| RPS20P14     | 0.578438411                            | N                                            | 0                                      | N                                   |
| SSNA1        | 0.578438411                            | N                                            | 0                                      | N                                   |

| Gene symbols | FDR (differential expression analysis) | Differentially expressed gene? Y, Yes; N, No | Number of insulin related publications | Insulin related gene? Y, Yes; N, No |
|--------------|----------------------------------------|----------------------------------------------|----------------------------------------|-------------------------------------|
| ZC3H6        | 0.578438411                            | N                                            | 0                                      | N                                   |
| FAM192BP     | 0.578440217                            | N                                            | 0                                      | N                                   |
| ERBB2        | 0.578518893                            | N                                            | 398                                    | Y                                   |
| DDX59        | 0.578629452                            | N                                            | 0                                      | N                                   |
| PANK2        | 0.578629452                            | N                                            | 1                                      | N                                   |
| AC104407.1   | 0.57863492                             | N                                            | 0                                      | N                                   |
| PCDHGA11     | 0.578642017                            | N                                            | 0                                      | N                                   |
| ATP8A2       | 0.578699721                            | N                                            | 0                                      | N                                   |
| HBD          | 0.578699721                            | N                                            | 29                                     | N                                   |
| HIST1H3J     | 0.578699721                            | N                                            | 0                                      | N                                   |
| COLCA1       | 0.578851122                            | N                                            | 0                                      | N                                   |
| LRRC3        | 0.578851122                            | N                                            | 0                                      | N                                   |
| NAPG         | 0.578888552                            | N                                            | 0                                      | N                                   |
| TP53BP2      | 0.579147335                            | N                                            | 1                                      | N                                   |
| TP11P2       | 0.579355134                            | N                                            | 0                                      | N                                   |
| AC026979.1   | 0.579731616                            | N                                            | 0                                      | N                                   |
| AC060766.4   | 0.579731616                            | N                                            | 0                                      | N                                   |
| ACTR3C       | 0.579731616                            | N                                            | 0                                      | N                                   |
| CRIP1P4      | 0.579731616                            | N                                            | 0                                      | N                                   |
| TBC1D24      | 0.579731616                            | N                                            | 0                                      | N                                   |
| AKR1B1P2     | 0.579919689                            | N                                            | 0                                      | N                                   |
| TMED7        | 0.579919689                            | N                                            | 0                                      | N                                   |
| AC098487.1   | 0.580078814                            | N                                            | 0                                      | N                                   |
| AL513534.1   | 0.580078814                            | N                                            | 0                                      | N                                   |
| CDKN2AIP     | 0.580078814                            | N                                            | 0                                      | N                                   |
| DCLRE1A      | 0.580078814                            | N                                            | 0                                      | N                                   |
| ENO1P3       | 0.580078814                            | N                                            | 0                                      | N                                   |
| MAMDC2       | 0.580078814                            | N                                            | 0                                      | N                                   |
| SLC9A7P1     | 0.580078814                            | N                                            | 0                                      | N                                   |
| ZEB1-AS1     | 0.580078814                            | N                                            | 0                                      | N                                   |
| AC004130.1   | 0.580186687                            | N                                            | 0                                      | N                                   |
| AC137056.2   | 0.580186687                            | N                                            | 0                                      | N                                   |
| AL512306.1   | 0.580186687                            | N                                            | 0                                      | N                                   |
| BRD1         | 0.580186687                            | N                                            | 1                                      | N                                   |
| CCDC136      | 0.580186687                            | N                                            | 0                                      | N                                   |
| CLEC9A       | 0.580186687                            | N                                            | 0                                      | N                                   |
| DPF1         | 0.580186687                            | N                                            | 1                                      | N                                   |
| FSTL5        | 0.580186687                            | N                                            | 0                                      | N                                   |
| GAPDHP72     | 0.580186687                            | N                                            | 0                                      | N                                   |
| PPIE         | 0.580186687                            | N                                            | 1                                      | N                                   |
| TCTN2        | 0.580186687                            | N                                            | 0                                      | N                                   |
| C16orf74     | 0.580227421                            | N                                            | 0                                      | N                                   |
| DDX17        | 0.580227421                            | N                                            | 1                                      | N                                   |
| INTS6        | 0.580227421                            | N                                            | 3                                      | N                                   |
| LAMA2        | 0.580227421                            | N                                            | 7                                      | N                                   |
| UMAD1        | 0.580227421                            | N                                            | 0                                      | N                                   |
| ZDHHC4       | 0.580227421                            | N                                            | 0                                      | N                                   |
| FABP5        | 0.580449948                            | N                                            | 94                                     | N                                   |
| MRPL49       | 0.580449948                            | N                                            | 0                                      | N                                   |
| AL355987.4   | 0.580474474                            | N                                            | 0                                      | N                                   |
| AC008878.3   | 0.580484135                            | N                                            | 0                                      | N                                   |
| AC017099.1   | 0.580484135                            | N                                            | 0                                      | N                                   |
| AC079193.2   | 0.580484135                            | N                                            | 0                                      | N                                   |
| IMMP1L       | 0.580484135                            | N                                            | 1                                      | N                                   |
| TMF1P1       | 0.580484135                            | N                                            | 0                                      | N                                   |
| AFG1L        | 0.580519228                            | N                                            | 0                                      | N                                   |
| CD4          | 0.580519228                            | N                                            | 1000                                   | Y                                   |
| EID2B        | 0.580519228                            | N                                            | 0                                      | N                                   |
| LSM2         | 0.580519228                            | N                                            | 1                                      | N                                   |
| SVIL-AS1     | 0.580519228                            | N                                            | 0                                      | N                                   |
| UCKL1        | 0.580519228                            | N                                            | 0                                      | N                                   |
| PSMG3        | 0.581014864                            | N                                            | 0                                      | N                                   |
| ZNF571-AS1   | 0.581078768                            | N                                            | 0                                      | N                                   |
| AC019205.2   | 0.581274716                            | N                                            | 0                                      | N                                   |
| C14orf28     | 0.581274716                            | N                                            | 0                                      | N                                   |
| MRPS16       | 0.581274716                            | N                                            | 0                                      | N                                   |

| Gene symbols   | FDR (differential expression analysis) | Differentially expressed gene? Y, Yes; N, No | Number of insulin related publications | Insulin related gene? Y, Yes; N, No |
|----------------|----------------------------------------|----------------------------------------------|----------------------------------------|-------------------------------------|
| ATP1A2         | 0.581459454                            | N                                            | 8                                      | N                                   |
| AC244093.1     | 0.581519535                            | N                                            | 0                                      | N                                   |
| AL079343.1     | 0.581519535                            | N                                            | 0                                      | N                                   |
| DPP10          | 0.581519535                            | N                                            | 1                                      | N                                   |
| GRHL1          | 0.581519535                            | N                                            | 0                                      | N                                   |
| Metazoa_SRP    | 0.581519535                            | N                                            | 0                                      | N                                   |
| NXF1           | 0.581519535                            | N                                            | 0                                      | N                                   |
| UBL4A          | 0.581519535                            | N                                            | 2                                      | N                                   |
| AC020763.4     | 0.581756809                            | N                                            | 0                                      | N                                   |
| DEX1           | 0.581756809                            | N                                            | 1                                      | N                                   |
| HLA-DMA        | 0.581756809                            | N                                            | 5                                      | N                                   |
| AL442128.2     | 0.582102132                            | N                                            | 0                                      | N                                   |
| CIR1P1         | 0.582161489                            | N                                            | 0                                      | N                                   |
| NBPF1          | 0.582161489                            | N                                            | 0                                      | N                                   |
| PTGES3L-AARSD1 | 0.582187286                            | N                                            | 0                                      | N                                   |
| ECEL1          | 0.58226852                             | N                                            | 0                                      | N                                   |
| NEFH           | 0.582318433                            | N                                            | 0                                      | N                                   |
| AC009414.2     | 0.582580915                            | N                                            | 0                                      | N                                   |
| AC108471.2     | 0.582580915                            | N                                            | 0                                      | N                                   |
| ADCK1          | 0.582580915                            | N                                            | 0                                      | N                                   |
| CA11           | 0.582580915                            | N                                            | 0                                      | N                                   |
| CDK5P1         | 0.582580915                            | N                                            | 0                                      | N                                   |
| GSG1           | 0.582580915                            | N                                            | 0                                      | N                                   |
| IBA57          | 0.582580915                            | N                                            | 0                                      | N                                   |
| LRRC8D         | 0.582580915                            | N                                            | 1                                      | N                                   |
| MORC2          | 0.582580915                            | N                                            | 0                                      | N                                   |
| PSMD6          | 0.582580915                            | N                                            | 3                                      | N                                   |
| RAB9B          | 0.582580915                            | N                                            | 0                                      | N                                   |
| SAXO2          | 0.582580915                            | N                                            | 0                                      | N                                   |
| TBRG4          | 0.582580915                            | N                                            | 0                                      | N                                   |
| TMEM62         | 0.582580915                            | N                                            | 0                                      | N                                   |
| VEGFA          | 0.582580915                            | N                                            | 314                                    | Y                                   |
| ZNF10          | 0.582580915                            | N                                            | 0                                      | N                                   |
| ZNF771         | 0.582580915                            | N                                            | 1                                      | N                                   |
| AADAT          | 0.582622446                            | N                                            | 1                                      | N                                   |
| AC005358.2     | 0.582622446                            | N                                            | 0                                      | N                                   |
| AVIL           | 0.582622446                            | N                                            | 16                                     | N                                   |
| DNAJA1         | 0.582622446                            | N                                            | 1                                      | N                                   |
| LINC01358      | 0.582622446                            | N                                            | 0                                      | N                                   |
| AC026271.1     | 0.582732726                            | N                                            | 0                                      | N                                   |
| IMMTP1         | 0.582732726                            | N                                            | 0                                      | N                                   |
| HIST1H1E       | 0.58292178                             | N                                            | 0                                      | N                                   |
| PCLO           | 0.583205698                            | N                                            | 6                                      | N                                   |
| IARS           | 0.583449443                            | N                                            | 2                                      | N                                   |
| DEPDC4         | 0.583464118                            | N                                            | 0                                      | N                                   |
| ZNF852         | 0.583490457                            | N                                            | 0                                      | N                                   |
| BEGAIN         | 0.583655435                            | N                                            | 0                                      | N                                   |
| HSPA8P9        | 0.583812264                            | N                                            | 0                                      | N                                   |
| LRP1B          | 0.583812264                            | N                                            | 6                                      | N                                   |
| AL031666.2     | 0.583861394                            | N                                            | 0                                      | N                                   |
| AC090771.1     | 0.583873295                            | N                                            | 0                                      | N                                   |
| AL022393.1     | 0.583873295                            | N                                            | 0                                      | N                                   |
| AP5M1          | 0.583873295                            | N                                            | 0                                      | N                                   |
| CCDC142        | 0.583873295                            | N                                            | 0                                      | N                                   |
| FAM162A        | 0.583873295                            | N                                            | 0                                      | N                                   |
| GOLGA8M        | 0.583873295                            | N                                            | 0                                      | N                                   |
| L1CAM          | 0.583873295                            | N                                            | 27                                     | N                                   |
| MAP2K5         | 0.583873295                            | N                                            | 5                                      | N                                   |
| RNF148         | 0.583873295                            | N                                            | 0                                      | N                                   |
| TMEM192        | 0.583873295                            | N                                            | 0                                      | N                                   |
| UBE3AP2        | 0.583873295                            | N                                            | 0                                      | N                                   |
| POLE           | 0.584175894                            | N                                            | 357                                    | Y                                   |
| AC004224.1     | 0.584182382                            | N                                            | 0                                      | N                                   |
| AC092378.1     | 0.584182382                            | N                                            | 0                                      | N                                   |
| AL450309.1     | 0.584182382                            | N                                            | 0                                      | N                                   |
| ASNSP1         | 0.584182382                            | N                                            | 0                                      | N                                   |

| Gene symbols | FDR (differential expression analysis) | Differentially expressed gene? Y, Yes; N, No | Number of insulin related publications | Insulin related gene? Y, Yes; N, No |
|--------------|----------------------------------------|----------------------------------------------|----------------------------------------|-------------------------------------|
| BAG6         | 0.584182382                            | N                                            | 2                                      | N                                   |
| LINC00240    | 0.584182382                            | N                                            | 0                                      | N                                   |
| LINC01515    | 0.584182382                            | N                                            | 0                                      | N                                   |
| LMO7         | 0.584182382                            | N                                            | 0                                      | N                                   |
| MESTP4       | 0.584182382                            | N                                            | 0                                      | N                                   |
| MT1A         | 0.584182382                            | N                                            | 5                                      | N                                   |
| NMNAT1P1     | 0.584182382                            | N                                            | 0                                      | N                                   |
| NR2C2AP      | 0.584182382                            | N                                            | 0                                      | N                                   |
| OLIG1        | 0.584182382                            | N                                            | 4                                      | N                                   |
| PACSIN1      | 0.584182382                            | N                                            | 0                                      | N                                   |
| PSG7         | 0.584182382                            | N                                            | 0                                      | N                                   |
| RAB42        | 0.584182382                            | N                                            | 1                                      | N                                   |
| TAS2R50      | 0.584182382                            | N                                            | 0                                      | N                                   |
| TFPT         | 0.584182382                            | N                                            | 1                                      | N                                   |
| USP40        | 0.584182382                            | N                                            | 0                                      | N                                   |
| AC134050.1   | 0.584196252                            | N                                            | 0                                      | N                                   |
| AC005906.1   | 0.584256117                            | N                                            | 0                                      | N                                   |
| AC092905.1   | 0.584277023                            | N                                            | 0                                      | N                                   |
| AC007823.1   | 0.584585457                            | N                                            | 0                                      | N                                   |
| AKR7L        | 0.584585457                            | N                                            | 0                                      | N                                   |
| BRD7P5       | 0.584585457                            | N                                            | 0                                      | N                                   |
| DECR1        | 0.584585457                            | N                                            | 1                                      | N                                   |
| PACS1        | 0.584585457                            | N                                            | 0                                      | N                                   |
| RBM4B        | 0.584585457                            | N                                            | 0                                      | N                                   |
| SPATC1L      | 0.584585457                            | N                                            | 0                                      | N                                   |
| VCP          | 0.584585457                            | N                                            | 15                                     | N                                   |
| AC009127.3   | 0.584782632                            | N                                            | 0                                      | N                                   |
| DCLK3        | 0.584782632                            | N                                            | 1                                      | N                                   |
| TRAP1        | 0.584782632                            | N                                            | 1                                      | N                                   |
| ALDH3A2      | 0.584894906                            | N                                            | 1                                      | N                                   |
| TMEM44-AS1   | 0.584937418                            | N                                            | 0                                      | N                                   |
| BRPF1        | 0.585137363                            | N                                            | 0                                      | N                                   |
| GLCE         | 0.585137363                            | N                                            | 0                                      | N                                   |
| STARD10      | 0.585137363                            | N                                            | 1                                      | N                                   |
| TSPAN33      | 0.585258336                            | N                                            | 1                                      | N                                   |
| UPRT         | 0.585258336                            | N                                            | 0                                      | N                                   |
| CREB3L2      | 0.585287541                            | N                                            | 0                                      | N                                   |
| SERPIND1     | 0.585287541                            | N                                            | 0                                      | N                                   |
| AC073585.1   | 0.585317185                            | N                                            | 0                                      | N                                   |
| INIP         | 0.585317185                            | N                                            | 0                                      | N                                   |
| CIQL2        | 0.585533525                            | N                                            | 0                                      | N                                   |
| CDC14A       | 0.585533525                            | N                                            | 2                                      | N                                   |
| LINC01238    | 0.585533525                            | N                                            | 0                                      | N                                   |
| HSP90AA2P    | 0.585554001                            | N                                            | 0                                      | N                                   |
| LINC00299    | 0.585560225                            | N                                            | 0                                      | N                                   |
| NDUFS3       | 0.585560225                            | N                                            | 5                                      | N                                   |
| SNORA54      | 0.585560225                            | N                                            | 0                                      | N                                   |
| TTC21B       | 0.585560225                            | N                                            | 0                                      | N                                   |
| BGN          | 0.585564038                            | N                                            | 14                                     | N                                   |
| AL137802.2   | 0.585610582                            | N                                            | 0                                      | N                                   |
| RALBP1       | 0.585610582                            | N                                            | 16                                     | N                                   |
| RPL34        | 0.585610582                            | N                                            | 0                                      | N                                   |
| TK2          | 0.585610582                            | N                                            | 0                                      | N                                   |
| AL445228.2   | 0.585761877                            | N                                            | 0                                      | N                                   |
| ASB9P1       | 0.585859077                            | N                                            | 0                                      | N                                   |
| CDK5RAP2     | 0.585917276                            | N                                            | 0                                      | N                                   |
| AC007336.3   | 0.586149006                            | N                                            | 0                                      | N                                   |
| ASB8         | 0.586149006                            | N                                            | 0                                      | N                                   |
| CAPNS2       | 0.586149006                            | N                                            | 0                                      | N                                   |
| CORO2B       | 0.586149006                            | N                                            | 0                                      | N                                   |
| RASGRF2      | 0.586149006                            | N                                            | 0                                      | N                                   |
| ZNF547       | 0.586149006                            | N                                            | 0                                      | N                                   |
| ERFE         | 0.586640494                            | N                                            | 1                                      | N                                   |
| AC010319.3   | 0.586730129                            | N                                            | 0                                      | N                                   |
| PBX1         | 0.586730129                            | N                                            | 18                                     | N                                   |
| AC006509.1   | 0.586951727                            | N                                            | 0                                      | N                                   |

| Gene symbols | FDR (differential expression analysis) | Differentially expressed gene? Y, Yes; N, No | Number of insulin related publications | Insulin related gene? Y, Yes; N, No |
|--------------|----------------------------------------|----------------------------------------------|----------------------------------------|-------------------------------------|
| LDLRAD4      | 0.586972334                            | N                                            | 0                                      | N                                   |
| ABCF2P1      | 0.587098562                            | N                                            | 0                                      | N                                   |
| AC011481.3   | 0.587119517                            | N                                            | 0                                      | N                                   |
| AC012358.3   | 0.587119517                            | N                                            | 0                                      | N                                   |
| AEBP2        | 0.587119517                            | N                                            | 2                                      | N                                   |
| AIMP1        | 0.587119517                            | N                                            | 0                                      | N                                   |
| AL596094.1   | 0.587119517                            | N                                            | 0                                      | N                                   |
| ARHGAP35     | 0.587119517                            | N                                            | 7                                      | N                                   |
| CFD          | 0.587119517                            | N                                            | 15                                     | N                                   |
| CHST9        | 0.587119517                            | N                                            | 0                                      | N                                   |
| CLMAT3       | 0.587119517                            | N                                            | 0                                      | N                                   |
| GOLGA1       | 0.587119517                            | N                                            | 0                                      | N                                   |
| IGSF9B       | 0.587119517                            | N                                            | 0                                      | N                                   |
| KLHDC9       | 0.587119517                            | N                                            | 0                                      | N                                   |
| LYPD6B       | 0.587119517                            | N                                            | 0                                      | N                                   |
| MAPT         | 0.587119517                            | N                                            | 53                                     | N                                   |
| NBR2         | 0.587119517                            | N                                            | 1                                      | N                                   |
| NFKBIB       | 0.587119517                            | N                                            | 0                                      | N                                   |
| PTPRA        | 0.587119517                            | N                                            | 34                                     | N                                   |
| RASGRP1      | 0.587119517                            | N                                            | 5                                      | N                                   |
| RNF7         | 0.587119517                            | N                                            | 0                                      | N                                   |
| SLC6A11      | 0.587119517                            | N                                            | 0                                      | N                                   |
| SOX11        | 0.587119517                            | N                                            | 8                                      | N                                   |
| SUPT6H       | 0.587119517                            | N                                            | 1                                      | N                                   |
| TCTN3        | 0.587119517                            | N                                            | 0                                      | N                                   |
| TERF1P4      | 0.587119517                            | N                                            | 0                                      | N                                   |
| WARS2        | 0.587119517                            | N                                            | 3                                      | N                                   |
| STEAP1B      | 0.587226295                            | N                                            | 0                                      | N                                   |
| AC090686.1   | 0.587269778                            | N                                            | 0                                      | N                                   |
| PPEF2        | 0.587269778                            | N                                            | 0                                      | N                                   |
| PRSS1        | 0.587269778                            | N                                            | 8                                      | N                                   |
| BYSL         | 0.58740245                             | N                                            | 1                                      | N                                   |
| CEND1        | 0.58740245                             | N                                            | 0                                      | N                                   |
| POLR2C       | 0.58740245                             | N                                            | 1                                      | N                                   |
| SPON1-AS1    | 0.58740245                             | N                                            | 0                                      | N                                   |
| AL357075.1   | 0.587514528                            | N                                            | 0                                      | N                                   |
| AC027801.3   | 0.58783033                             | N                                            | 0                                      | N                                   |
| RIOX1        | 0.58783033                             | N                                            | 0                                      | N                                   |
| AC002044.3   | 0.588122665                            | N                                            | 0                                      | N                                   |
| LPIN1        | 0.588122665                            | N                                            | 67                                     | N                                   |
| AC022915.2   | 0.588130707                            | N                                            | 0                                      | N                                   |
| AC093297.3   | 0.588130707                            | N                                            | 0                                      | N                                   |
| ATP11B       | 0.588130707                            | N                                            | 0                                      | N                                   |
| TDRD12       | 0.588130707                            | N                                            | 0                                      | N                                   |
| COX8A        | 0.588253835                            | N                                            | 1                                      | N                                   |
| POC1B        | 0.588382594                            | N                                            | 0                                      | N                                   |
| ARID3B       | 0.588419076                            | N                                            | 0                                      | N                                   |
| SGIP1        | 0.588453456                            | N                                            | 0                                      | N                                   |
| AC027313.1   | 0.588469516                            | N                                            | 0                                      | N                                   |
| PPP1R12B     | 0.588469516                            | N                                            | 1                                      | N                                   |
| SYCP1        | 0.588469516                            | N                                            | 1                                      | N                                   |
| TUBGCP3      | 0.588498595                            | N                                            | 0                                      | N                                   |
| FRG1HP       | 0.588588323                            | N                                            | 0                                      | N                                   |
| MOB1B        | 0.588588323                            | N                                            | 0                                      | N                                   |
| NPNT         | 0.588588323                            | N                                            | 0                                      | N                                   |
| PARGP1       | 0.588588323                            | N                                            | 0                                      | N                                   |
| AC107375.1   | 0.588673995                            | N                                            | 0                                      | N                                   |
| BSDC1        | 0.588673995                            | N                                            | 0                                      | N                                   |
| MAP3K7       | 0.588673995                            | N                                            | 3                                      | N                                   |
| RN7SL23P     | 0.588673995                            | N                                            | 0                                      | N                                   |
| SCLY         | 0.588673995                            | N                                            | 5                                      | N                                   |
| UFD1         | 0.588673995                            | N                                            | 0                                      | N                                   |
| Z99289.2     | 0.588673995                            | N                                            | 0                                      | N                                   |
| EIF4E3       | 0.588725283                            | N                                            | 0                                      | N                                   |
| AGPAT5       | 0.588907033                            | N                                            | 1                                      | N                                   |
| AL499616.1   | 0.588916777                            | N                                            | 0                                      | N                                   |

| Gene symbols | FDR (differential expression analysis) | Differentially expressed gene? Y, Yes; N, No | Number of insulin related publications | Insulin related gene? Y, Yes; N, No |
|--------------|----------------------------------------|----------------------------------------------|----------------------------------------|-------------------------------------|
| ORC3         | 0.588916777                            | N                                            | 0                                      | N                                   |
| TTYH3        | 0.588916777                            | N                                            | 0                                      | N                                   |
| LOH12CR2     | 0.588983546                            | N                                            | 0                                      | N                                   |
| METTL2A      | 0.589326609                            | N                                            | 0                                      | N                                   |
| PJA1         | 0.589326609                            | N                                            | 0                                      | N                                   |
| STAM-AS1     | 0.589865399                            | N                                            | 0                                      | N                                   |
| UPF2         | 0.589891069                            | N                                            | 1                                      | N                                   |
| IFT43        | 0.589981809                            | N                                            | 0                                      | N                                   |
| INPP5E       | 0.589981809                            | N                                            | 5                                      | N                                   |
| LMX1B        | 0.589981809                            | N                                            | 4                                      | N                                   |
| RPS3AP38     | 0.589981809                            | N                                            | 0                                      | N                                   |
| AC090616.6   | 0.590020423                            | N                                            | 0                                      | N                                   |
| UBN1         | 0.590020423                            | N                                            | 0                                      | N                                   |
| AC007336.1   | 0.590025942                            | N                                            | 0                                      | N                                   |
| AC109481.1   | 0.590025942                            | N                                            | 0                                      | N                                   |
| AKR1B10      | 0.590025942                            | N                                            | 4                                      | N                                   |
| CFP          | 0.590025942                            | N                                            | 70                                     | N                                   |
| LINC01534    | 0.590025942                            | N                                            | 0                                      | N                                   |
| MGAT2        | 0.590025942                            | N                                            | 4                                      | N                                   |
| PDCD4-AS1    | 0.590025942                            | N                                            | 0                                      | N                                   |
| ZNF765       | 0.590025942                            | N                                            | 0                                      | N                                   |
| ARHGEF35     | 0.59023837                             | N                                            | 0                                      | N                                   |
| HULC         | 0.59023837                             | N                                            | 1                                      | N                                   |
| MTF2         | 0.59023837                             | N                                            | 1                                      | N                                   |
| RN7SL648P    | 0.59023837                             | N                                            | 0                                      | N                                   |
| MAP9         | 0.590283521                            | N                                            | 0                                      | N                                   |
| MSANTD2      | 0.590283521                            | N                                            | 0                                      | N                                   |
| ADAMTS17     | 0.590418063                            | N                                            | 0                                      | N                                   |
| HCG18        | 0.590418063                            | N                                            | 0                                      | N                                   |
| WNT2         | 0.590418063                            | N                                            | 12                                     | N                                   |
| AC005726.2   | 0.590677334                            | N                                            | 0                                      | N                                   |
| IL17RB       | 0.590677334                            | N                                            | 0                                      | N                                   |
| UNC119B      | 0.590677334                            | N                                            | 0                                      | N                                   |
| AC087821.1   | 0.59075173                             | N                                            | 0                                      | N                                   |
| AL121835.2   | 0.59075173                             | N                                            | 0                                      | N                                   |
| IGFBP3       | 0.59075173                             | N                                            | 1000                                   | Y                                   |
| TNFRSF12A    | 0.59075173                             | N                                            | 10                                     | N                                   |
| AC009506.1   | 0.590819404                            | N                                            | 0                                      | N                                   |
| PLPPR3       | 0.590819404                            | N                                            | 0                                      | N                                   |
| SRP9         | 0.590819404                            | N                                            | 0                                      | N                                   |
| AL355877.1   | 0.590978384                            | N                                            | 0                                      | N                                   |
| KDM8         | 0.591054169                            | N                                            | 0                                      | N                                   |
| KYNU         | 0.591054169                            | N                                            | 2                                      | N                                   |
| LINC01909    | 0.591054169                            | N                                            | 0                                      | N                                   |
| MAPK6PS2     | 0.591054169                            | N                                            | 0                                      | N                                   |
| TMF1         | 0.591054169                            | N                                            | 0                                      | N                                   |
| AC009948.2   | 0.591257142                            | N                                            | 0                                      | N                                   |
| KBTBD3       | 0.591257142                            | N                                            | 0                                      | N                                   |
| TMBIM6       | 0.591308459                            | N                                            | 5                                      | N                                   |
| MORC2-AS1    | 0.591385475                            | N                                            | 0                                      | N                                   |
| PPP1R3G      | 0.591385475                            | N                                            | 3                                      | N                                   |
| TTC22        | 0.59151331                             | N                                            | 0                                      | N                                   |
| AC009248.2   | 0.591584319                            | N                                            | 0                                      | N                                   |
| AC025419.1   | 0.591584319                            | N                                            | 0                                      | N                                   |
| BEND5        | 0.591584319                            | N                                            | 0                                      | N                                   |
| CLSTN3       | 0.591584319                            | N                                            | 0                                      | N                                   |
| FKBP1A       | 0.591584319                            | N                                            | 0                                      | N                                   |
| LRCH1        | 0.591584319                            | N                                            | 0                                      | N                                   |
| RWDD4P1      | 0.591584319                            | N                                            | 0                                      | N                                   |
| TECPR2       | 0.591584319                            | N                                            | 0                                      | N                                   |
| RGS9BP       | 0.591803275                            | N                                            | 0                                      | N                                   |
| AL137191.1   | 0.591887788                            | N                                            | 0                                      | N                                   |
| ANXA5        | 0.591887788                            | N                                            | 4                                      | N                                   |
| DNAAF2       | 0.591887788                            | N                                            | 0                                      | N                                   |
| DSCC1        | 0.591887788                            | N                                            | 0                                      | N                                   |
| MTCO1P1      | 0.591887788                            | N                                            | 0                                      | N                                   |

| Gene symbols | FDR (differential expression analysis) | Differentially expressed gene? Y, Yes; N, No | Number of insulin related publications | Insulin related gene? Y, Yes; N, No |
|--------------|----------------------------------------|----------------------------------------------|----------------------------------------|-------------------------------------|
| NDUFA5P11    | 0.591887788                            | N                                            | 0                                      | N                                   |
| PIM3         | 0.591887788                            | N                                            | 1                                      | N                                   |
| PTPRG-AS1    | 0.591887788                            | N                                            | 0                                      | N                                   |
| PNMA8A       | 0.591919079                            | N                                            | 0                                      | N                                   |
| KRT80        | 0.591966876                            | N                                            | 0                                      | N                                   |
| CHODL        | 0.59196979                             | N                                            | 1                                      | N                                   |
| POC1B-AS1    | 0.59196979                             | N                                            | 0                                      | N                                   |
| TBCB         | 0.59196979                             | N                                            | 2                                      | N                                   |
| AC068418.2   | 0.592208584                            | N                                            | 0                                      | N                                   |
| AC093010.1   | 0.592208584                            | N                                            | 0                                      | N                                   |
| AC104837.1   | 0.592208584                            | N                                            | 0                                      | N                                   |
| AC120349.2   | 0.592208584                            | N                                            | 0                                      | N                                   |
| ACTB         | 0.592208584                            | N                                            | 28                                     | N                                   |
| CDK2AP2      | 0.592208584                            | N                                            | 0                                      | N                                   |
| DMC1         | 0.592208584                            | N                                            | 0                                      | N                                   |
| FAM20A       | 0.592208584                            | N                                            | 0                                      | N                                   |
| GRM7         | 0.592208584                            | N                                            | 0                                      | N                                   |
| KIAA1210     | 0.592208584                            | N                                            | 0                                      | N                                   |
| MRPL14       | 0.592208584                            | N                                            | 0                                      | N                                   |
| MTA3         | 0.592208584                            | N                                            | 1                                      | N                                   |
| NRDE2        | 0.592208584                            | N                                            | 0                                      | N                                   |
| PLPP4        | 0.592208584                            | N                                            | 0                                      | N                                   |
| TPST1        | 0.592208584                            | N                                            | 0                                      | N                                   |
| UBE2MP1      | 0.592233733                            | N                                            | 0                                      | N                                   |
| GPRASP2      | 0.592262959                            | N                                            | 0                                      | N                                   |
| AC079305.2   | 0.592271374                            | N                                            | 0                                      | N                                   |
| ZFYVE26      | 0.592271374                            | N                                            | 1                                      | N                                   |
| HMG1         | 0.592295305                            | N                                            | 4                                      | N                                   |
| DAPK1-IT1    | 0.59243866                             | N                                            | 0                                      | N                                   |
| ESRG         | 0.59243866                             | N                                            | 0                                      | N                                   |
| SLC25A45     | 0.59243866                             | N                                            | 0                                      | N                                   |
| KDELR1       | 0.592449746                            | N                                            | 1                                      | N                                   |
| SNX5         | 0.592449746                            | N                                            | 3                                      | N                                   |
| ZNF404       | 0.592449746                            | N                                            | 0                                      | N                                   |
| DHX30        | 0.592547561                            | N                                            | 0                                      | N                                   |
| RAD51C       | 0.592547561                            | N                                            | 0                                      | N                                   |
| TECRP2       | 0.592547561                            | N                                            | 0                                      | N                                   |
| HELLS        | 0.59262128                             | N                                            | 0                                      | N                                   |
| GET4         | 0.592705923                            | N                                            | 0                                      | N                                   |
| DSC3         | 0.59279348                             | N                                            | 0                                      | N                                   |
| FER          | 0.59279348                             | N                                            | 34                                     | N                                   |
| AC095057.3   | 0.592847485                            | N                                            | 0                                      | N                                   |
| APOOL        | 0.592847485                            | N                                            | 0                                      | N                                   |
| CPEB4        | 0.592847485                            | N                                            | 1                                      | N                                   |
| DOHH         | 0.592847485                            | N                                            | 0                                      | N                                   |
| EIF3KP3      | 0.592847485                            | N                                            | 0                                      | N                                   |
| MED28P1      | 0.592847485                            | N                                            | 0                                      | N                                   |
| PINK1        | 0.592847485                            | N                                            | 24                                     | N                                   |
| UBA2         | 0.592847485                            | N                                            | 0                                      | N                                   |
| NDUFA6-AS1   | 0.592893695                            | N                                            | 0                                      | N                                   |
| TVP23B       | 0.592893695                            | N                                            | 0                                      | N                                   |
| CF1          | 0.592924659                            | N                                            | 16                                     | N                                   |
| LCN10        | 0.592924659                            | N                                            | 0                                      | N                                   |
| ABI2         | 0.593004142                            | N                                            | 1                                      | N                                   |
| AC091959.3   | 0.593004142                            | N                                            | 0                                      | N                                   |
| FAM19A5      | 0.593004142                            | N                                            | 0                                      | N                                   |
| IGBP1P1      | 0.593004142                            | N                                            | 0                                      | N                                   |
| LIX1L-AS1    | 0.593004142                            | N                                            | 0                                      | N                                   |
| MED26        | 0.593004142                            | N                                            | 0                                      | N                                   |
| PODNL1       | 0.593004142                            | N                                            | 0                                      | N                                   |
| PTPRCAP      | 0.593004142                            | N                                            | 0                                      | N                                   |
| RN7SL670P    | 0.593004142                            | N                                            | 0                                      | N                                   |
| TMEM214      | 0.593004142                            | N                                            | 0                                      | N                                   |
| AC016722.1   | 0.59306817                             | N                                            | 0                                      | N                                   |
| BVES         | 0.59306817                             | N                                            | 0                                      | N                                   |
| AC040174.1   | 0.593102651                            | N                                            | 0                                      | N                                   |

| Gene symbols | FDR (differential expression analysis) | Differentially expressed gene? Y, Yes; N, No | Number of insulin related publications | Insulin related gene? Y, Yes; N, No |
|--------------|----------------------------------------|----------------------------------------------|----------------------------------------|-------------------------------------|
| ZC3H13       | 0.593102651                            | N                                            | 0                                      | N                                   |
| PURG         | 0.593266416                            | N                                            | 0                                      | N                                   |
| AC005858.4   | 0.593381747                            | N                                            | 0                                      | N                                   |
| ARHGAP23P1   | 0.593381747                            | N                                            | 0                                      | N                                   |
| C9orf172     | 0.593381747                            | N                                            | 0                                      | N                                   |
| CDK11B       | 0.593381747                            | N                                            | 0                                      | N                                   |
| PTCD3        | 0.593381747                            | N                                            | 0                                      | N                                   |
| AC013489.1   | 0.593481369                            | N                                            | 0                                      | N                                   |
| CCDC85A      | 0.593481369                            | N                                            | 0                                      | N                                   |
| SCN7A        | 0.593793128                            | N                                            | 1                                      | N                                   |
| AC007842.1   | 0.593917165                            | N                                            | 0                                      | N                                   |
| GNE          | 0.593917165                            | N                                            | 3                                      | N                                   |
| KLHL9        | 0.593917165                            | N                                            | 1                                      | N                                   |
| MRPL53       | 0.593917165                            | N                                            | 0                                      | N                                   |
| MT1HL1       | 0.593917165                            | N                                            | 0                                      | N                                   |
| NUMB         | 0.593917165                            | N                                            | 9                                      | N                                   |
| PCA3         | 0.593917165                            | N                                            | 3                                      | N                                   |
| SYK          | 0.593917165                            | N                                            | 31                                     | N                                   |
| AC068657.1   | 0.593961744                            | N                                            | 0                                      | N                                   |
| MIPOL1       | 0.593961744                            | N                                            | 0                                      | N                                   |
| PATE1        | 0.593961744                            | N                                            | 0                                      | N                                   |
| GADL1        | 0.594045127                            | N                                            | 1                                      | N                                   |
| STX8         | 0.594045127                            | N                                            | 1                                      | N                                   |
| SMIM10L2A    | 0.594234857                            | N                                            | 0                                      | N                                   |
| ATP8B5P      | 0.594447683                            | N                                            | 0                                      | N                                   |
| AC009501.1   | 0.594544788                            | N                                            | 0                                      | N                                   |
| AC104417.1   | 0.594544788                            | N                                            | 0                                      | N                                   |
| AL591846.1   | 0.594544788                            | N                                            | 0                                      | N                                   |
| C19orf38     | 0.594544788                            | N                                            | 0                                      | N                                   |
| NPM3         | 0.594544788                            | N                                            | 0                                      | N                                   |
| PBXIP1       | 0.594544788                            | N                                            | 1                                      | N                                   |
| REEP1        | 0.594544788                            | N                                            | 0                                      | N                                   |
| TRIR         | 0.594544788                            | N                                            | 0                                      | N                                   |
| AC112198.1   | 0.594559937                            | N                                            | 0                                      | N                                   |
| DENND3       | 0.594559937                            | N                                            | 0                                      | N                                   |
| TET3         | 0.594559937                            | N                                            | 3                                      | N                                   |
| WBP2         | 0.594559937                            | N                                            | 1                                      | N                                   |
| EXO5         | 0.594631589                            | N                                            | 0                                      | N                                   |
| KRT8P15      | 0.594631589                            | N                                            | 0                                      | N                                   |
| TDRD15       | 0.594631589                            | N                                            | 0                                      | N                                   |
| AC027682.1   | 0.594638447                            | N                                            | 0                                      | N                                   |
| AL359075.2   | 0.594638447                            | N                                            | 0                                      | N                                   |
| DYNC1L1      | 0.594638447                            | N                                            | 0                                      | N                                   |
| PHF5CP       | 0.594638447                            | N                                            | 0                                      | N                                   |
| HIST1H1D     | 0.594720136                            | N                                            | 0                                      | N                                   |
| LINC00987    | 0.594720136                            | N                                            | 0                                      | N                                   |
| MTCH2        | 0.594720136                            | N                                            | 6                                      | N                                   |
| AP000997.2   | 0.594804308                            | N                                            | 0                                      | N                                   |
| BMS1P22      | 0.594804308                            | N                                            | 0                                      | N                                   |
| EIF3B        | 0.594804308                            | N                                            | 0                                      | N                                   |
| STX18        | 0.594804308                            | N                                            | 0                                      | N                                   |
| TRMT10B      | 0.594804308                            | N                                            | 0                                      | N                                   |
| SDHB         | 0.594978191                            | N                                            | 13                                     | N                                   |
| RPSAP13      | 0.594999175                            | N                                            | 0                                      | N                                   |
| AC025682.1   | 0.595030866                            | N                                            | 0                                      | N                                   |
| MAIP1        | 0.595030866                            | N                                            | 0                                      | N                                   |
| N6AMT1       | 0.595030866                            | N                                            | 0                                      | N                                   |
| SCRN1        | 0.595072458                            | N                                            | 0                                      | N                                   |
| OTUD7A       | 0.595185397                            | N                                            | 1                                      | N                                   |
| Z69720.1     | 0.595218127                            | N                                            | 0                                      | N                                   |
| CARHSP1      | 0.595411899                            | N                                            | 3                                      | N                                   |
| Z95152.1     | 0.59555938                             | N                                            | 0                                      | N                                   |
| ZBED3        | 0.59555938                             | N                                            | 4                                      | N                                   |
| AC006480.2   | 0.596126736                            | N                                            | 0                                      | N                                   |
| AC069528.2   | 0.596126736                            | N                                            | 0                                      | N                                   |
| HTR1B        | 0.596126736                            | N                                            | 4                                      | N                                   |



| Gene symbols | FDR (differential expression analysis) | Differentially expressed gene? Y, Yes; N, No | Number of insulin related publications | Insulin related gene? Y, Yes; N, No |
|--------------|----------------------------------------|----------------------------------------------|----------------------------------------|-------------------------------------|
| RBM17P2      | 0.596126736                            | N                                            | 0                                      | N                                   |
| ZNF345       | 0.596126736                            | N                                            | 0                                      | N                                   |
| ARL4C        | 0.59617227                             | N                                            | 3                                      | N                                   |
| WDR45P1      | 0.596214212                            | N                                            | 0                                      | N                                   |
| AMT          | 0.596299724                            | N                                            | 41                                     | N                                   |
| RAD54L       | 0.596299724                            | N                                            | 0                                      | N                                   |
| MED4-AS1     | 0.596361748                            | N                                            | 0                                      | N                                   |
| NUP58        | 0.596361748                            | N                                            | 0                                      | N                                   |
| AC024075.1   | 0.596369993                            | N                                            | 0                                      | N                                   |
| AC004477.1   | 0.596425054                            | N                                            | 0                                      | N                                   |
| USP16        | 0.596647128                            | N                                            | 1                                      | N                                   |
| AC011939.3   | 0.596881515                            | N                                            | 0                                      | N                                   |
| AF279873.1   | 0.597062976                            | N                                            | 0                                      | N                                   |
| GPR157       | 0.597415339                            | N                                            | 0                                      | N                                   |
| ZXDC         | 0.597415339                            | N                                            | 0                                      | N                                   |
| LLPH         | 0.597425583                            | N                                            | 0                                      | N                                   |
| AL031719.2   | 0.597518392                            | N                                            | 0                                      | N                                   |
| ENHO         | 0.597518392                            | N                                            | 40                                     | N                                   |
| NUDT18       | 0.597518392                            | N                                            | 0                                      | N                                   |
| AL513497.1   | 0.597661088                            | N                                            | 0                                      | N                                   |
| AL139246.5   | 0.597663256                            | N                                            | 0                                      | N                                   |
| GSTK1        | 0.59767615                             | N                                            | 10                                     | N                                   |
| SKP1         | 0.59767615                             | N                                            | 13                                     | N                                   |
| GDAP2        | 0.597694614                            | N                                            | 0                                      | N                                   |
| IL4R         | 0.597694614                            | N                                            | 6                                      | N                                   |
| AP000240.1   | 0.597759499                            | N                                            | 0                                      | N                                   |
| AL136116.3   | 0.597826805                            | N                                            | 0                                      | N                                   |
| C16orf58     | 0.597826805                            | N                                            | 0                                      | N                                   |
| DBIP1        | 0.597826805                            | N                                            | 0                                      | N                                   |
| VAMP1        | 0.597826805                            | N                                            | 4                                      | N                                   |
| ETFRF1       | 0.597859513                            | N                                            | 0                                      | N                                   |
| MAD1L1       | 0.597859513                            | N                                            | 2                                      | N                                   |
| INGX         | 0.597903859                            | N                                            | 1                                      | N                                   |
| PYCARD-AS1   | 0.597985347                            | N                                            | 0                                      | N                                   |
| ATP8A2P2     | 0.597997283                            | N                                            | 0                                      | N                                   |
| OSBPL1A      | 0.597997283                            | N                                            | 0                                      | N                                   |
| AHNAK2       | 0.598010477                            | N                                            | 0                                      | N                                   |
| AC017083.3   | 0.598011536                            | N                                            | 0                                      | N                                   |
| AL445189.2   | 0.598011536                            | N                                            | 0                                      | N                                   |
| C6orf52      | 0.598011536                            | N                                            | 0                                      | N                                   |
| MYL6P2       | 0.598011536                            | N                                            | 0                                      | N                                   |
| PCMTD1P3     | 0.598011536                            | N                                            | 0                                      | N                                   |
| TRPM1        | 0.598011536                            | N                                            | 1                                      | N                                   |
| AEN          | 0.598108763                            | N                                            | 1                                      | N                                   |
| CNOT7P1      | 0.598108763                            | N                                            | 0                                      | N                                   |
| AL137784.1   | 0.59816646                             | N                                            | 0                                      | N                                   |
| GRASP        | 0.59816646                             | N                                            | 273                                    | Y                                   |
| RHBG         | 0.59816646                             | N                                            | 0                                      | N                                   |
| P2RX7        | 0.598420217                            | N                                            | 17                                     | N                                   |
| PML          | 0.598488083                            | N                                            | 21                                     | N                                   |
| AC005034.5   | 0.598587947                            | N                                            | 0                                      | N                                   |
| AC046185.1   | 0.598587947                            | N                                            | 0                                      | N                                   |
| SHC1         | 0.598587947                            | N                                            | 174                                    | Y                                   |
| TSSK3        | 0.598587947                            | N                                            | 1                                      | N                                   |
| AC006111.2   | 0.598611035                            | N                                            | 0                                      | N                                   |
| AL353072.1   | 0.598611035                            | N                                            | 0                                      | N                                   |
| CYFIP1       | 0.598611035                            | N                                            | 1                                      | N                                   |
| LILRA2       | 0.598611035                            | N                                            | 0                                      | N                                   |
| MMACHC       | 0.598611035                            | N                                            | 1                                      | N                                   |
| PARD6G-AS1   | 0.598611035                            | N                                            | 0                                      | N                                   |
| PSMB8-AS1    | 0.598611035                            | N                                            | 0                                      | N                                   |
| SNAP23P1     | 0.598611035                            | N                                            | 0                                      | N                                   |
| TMEM136      | 0.598611035                            | N                                            | 0                                      | N                                   |
| TMEM199      | 0.598611035                            | N                                            | 0                                      | N                                   |
| TRIM72       | 0.598611035                            | N                                            | 17                                     | N                                   |
| ZNF596       | 0.598611035                            | N                                            | 0                                      | N                                   |

| Gene symbols | FDR (differential expression analysis) | Differentially expressed gene? Y, Yes; N, No | Number of insulin related publications | Insulin related gene? Y, Yes; N, No |
|--------------|----------------------------------------|----------------------------------------------|----------------------------------------|-------------------------------------|
| AC018529.3   | 0.598663673                            | N                                            | 0                                      | N                                   |
| C21orf91     | 0.598663673                            | N                                            | 0                                      | N                                   |
| DNAJC14      | 0.598663673                            | N                                            | 0                                      | N                                   |
| L3MBTL1      | 0.598663673                            | N                                            | 0                                      | N                                   |
| SNHG19       | 0.598663673                            | N                                            | 0                                      | N                                   |
| TRAPP11      | 0.598663673                            | N                                            | 0                                      | N                                   |
| WDR45        | 0.598663673                            | N                                            | 0                                      | N                                   |
| AC026904.1   | 0.59867713                             | N                                            | 0                                      | N                                   |
| IMMP2L       | 0.59867713                             | N                                            | 0                                      | N                                   |
| MAPKAPK5-AS1 | 0.59867713                             | N                                            | 0                                      | N                                   |
| NREP         | 0.59867713                             | N                                            | 0                                      | N                                   |
| SMARCA2      | 0.598935301                            | N                                            | 4                                      | N                                   |
| WDR45B       | 0.59933412                             | N                                            | 0                                      | N                                   |
| Z93930.3     | 0.599373225                            | N                                            | 0                                      | N                                   |
| AC021146.7   | 0.59992068                             | N                                            | 0                                      | N                                   |
| AL807752.1   | 0.59992068                             | N                                            | 0                                      | N                                   |
| ASNA1        | 0.59992068                             | N                                            | 4                                      | N                                   |
| AAMP         | 0.600064414                            | N                                            | 3                                      | N                                   |
| AP000563.1   | 0.600064414                            | N                                            | 0                                      | N                                   |
| DRG1         | 0.600064414                            | N                                            | 0                                      | N                                   |
| AC005996.1   | 0.600177                               | N                                            | 0                                      | N                                   |
| AC009319.1   | 0.600177                               | N                                            | 0                                      | N                                   |
| AC018645.3   | 0.600177                               | N                                            | 0                                      | N                                   |
| AC091271.1   | 0.600177                               | N                                            | 0                                      | N                                   |
| AC092835.1   | 0.600177                               | N                                            | 0                                      | N                                   |
| AC112229.3   | 0.600177                               | N                                            | 0                                      | N                                   |
| AMMECR1L     | 0.600177                               | N                                            | 0                                      | N                                   |
| ARNTL        | 0.600177                               | N                                            | 69                                     | N                                   |
| ATXN7        | 0.600177                               | N                                            | 2                                      | N                                   |
| AZIN2        | 0.600177                               | N                                            | 1                                      | N                                   |
| CENPCP1      | 0.600177                               | N                                            | 0                                      | N                                   |
| GOLGA5P1     | 0.600177                               | N                                            | 0                                      | N                                   |
| INO80E       | 0.600177                               | N                                            | 0                                      | N                                   |
| INPP5D       | 0.600177                               | N                                            | 11                                     | N                                   |
| LINC01123    | 0.600177                               | N                                            | 0                                      | N                                   |
| MAP3K14-AS1  | 0.600177                               | N                                            | 0                                      | N                                   |
| NHS          | 0.600177                               | N                                            | 1000                                   | Y                                   |
| NMRAL1       | 0.600177                               | N                                            | 0                                      | N                                   |
| POLE4        | 0.600177                               | N                                            | 0                                      | N                                   |
| PRKDC        | 0.600177                               | N                                            | 13                                     | N                                   |
| SLC2A8       | 0.600177                               | N                                            | 42                                     | N                                   |
| TBKBP1       | 0.600177                               | N                                            | 0                                      | N                                   |
| WDR11-AS1    | 0.600177                               | N                                            | 0                                      | N                                   |
| AC009948.1   | 0.600198018                            | N                                            | 0                                      | N                                   |
| AC007923.4   | 0.600270821                            | N                                            | 0                                      | N                                   |
| CD37         | 0.600373912                            | N                                            | 0                                      | N                                   |
| MORF4L2-AS1  | 0.600373912                            | N                                            | 0                                      | N                                   |
| PRDX2P1      | 0.600415934                            | N                                            | 0                                      | N                                   |
| AL513533.1   | 0.600542628                            | N                                            | 0                                      | N                                   |
| SULT1A2      | 0.600542628                            | N                                            | 0                                      | N                                   |
| TNNI3K       | 0.600542628                            | N                                            | 2                                      | N                                   |
| AC011603.2   | 0.600591457                            | N                                            | 0                                      | N                                   |
| AKT1         | 0.600591457                            | N                                            | 1000                                   | Y                                   |
| AL109614.1   | 0.600591457                            | N                                            | 0                                      | N                                   |
| FUT8         | 0.600591457                            | N                                            | 4                                      | N                                   |
| GABARAPL2    | 0.600591457                            | N                                            | 1                                      | N                                   |
| AC022417.1   | 0.600606434                            | N                                            | 0                                      | N                                   |
| KCNK15       | 0.600606434                            | N                                            | 0                                      | N                                   |
| MYL12AP1     | 0.600713682                            | N                                            | 0                                      | N                                   |
| PHC1         | 0.600713682                            | N                                            | 0                                      | N                                   |
| SEPSECS      | 0.600713682                            | N                                            | 0                                      | N                                   |
| NDFIP2       | 0.600794305                            | N                                            | 0                                      | N                                   |
| CUL1         | 0.600868853                            | N                                            | 6                                      | N                                   |
| AC098476.1   | 0.600954432                            | N                                            | 0                                      | N                                   |
| AC009088.1   | 0.601020635                            | N                                            | 0                                      | N                                   |
| AL139811.2   | 0.601175296                            | N                                            | 0                                      | N                                   |

| Gene symbols | FDR (differential expression analysis) | Differentially expressed gene? Y, Yes; N, No | Number of insulin related publications | Insulin related gene? Y, Yes; N, No |
|--------------|----------------------------------------|----------------------------------------------|----------------------------------------|-------------------------------------|
| ANGPTL1      | 0.601175296                            | N                                            | 6                                      | N                                   |
| TBC1D7       | 0.60120664                             | N                                            | 3                                      | N                                   |
| TMX1         | 0.60120664                             | N                                            | 1                                      | N                                   |
| FAF1         | 0.601306935                            | N                                            | 2                                      | N                                   |
| NUDT19       | 0.601306935                            | N                                            | 0                                      | N                                   |
| C14orf159    | 0.601375269                            | N                                            | 0                                      | N                                   |
| MUM1         | 0.601375269                            | N                                            | 1                                      | N                                   |
| AC010240.2   | 0.601381484                            | N                                            | 0                                      | N                                   |
| FLJ31104     | 0.601381484                            | N                                            | 0                                      | N                                   |
| KRTAP5-AS1   | 0.601381484                            | N                                            | 0                                      | N                                   |
| STIM1        | 0.601381484                            | N                                            | 25                                     | N                                   |
| TAS2R10      | 0.601381484                            | N                                            | 0                                      | N                                   |
| AC006213.6   | 0.601514697                            | N                                            | 0                                      | N                                   |
| NUTM2D       | 0.60152815                             | N                                            | 0                                      | N                                   |
| ING4         | 0.601534952                            | N                                            | 1                                      | N                                   |
| NEK9         | 0.601534952                            | N                                            | 0                                      | N                                   |
| XIAP         | 0.601609813                            | N                                            | 48                                     | N                                   |
| AP005328.1   | 0.601633954                            | N                                            | 0                                      | N                                   |
| LINC01140    | 0.601633954                            | N                                            | 0                                      | N                                   |
| SORBS1       | 0.601739599                            | N                                            | 23                                     | N                                   |
| AC012020.1   | 0.60191257                             | N                                            | 0                                      | N                                   |
| CDO1         | 0.60191257                             | N                                            | 1                                      | N                                   |
| DEDD2        | 0.60191257                             | N                                            | 0                                      | N                                   |
| DTD2         | 0.60191257                             | N                                            | 0                                      | N                                   |
| XIAPP2       | 0.60191257                             | N                                            | 0                                      | N                                   |
| XPOTP1       | 0.601969249                            | N                                            | 0                                      | N                                   |
| AC026688.1   | 0.601970012                            | N                                            | 0                                      | N                                   |
| METTL2B      | 0.601970012                            | N                                            | 0                                      | N                                   |
| CCT6P1       | 0.602113782                            | N                                            | 0                                      | N                                   |
| TTL          | 0.60231774                             | N                                            | 4                                      | N                                   |
| CCDC163      | 0.602319867                            | N                                            | 0                                      | N                                   |
| CCNB1IP1P1   | 0.602319867                            | N                                            | 0                                      | N                                   |
| RPP40        | 0.602319867                            | N                                            | 0                                      | N                                   |
| TRIM3        | 0.602319867                            | N                                            | 0                                      | N                                   |
| ZNF787       | 0.602319867                            | N                                            | 0                                      | N                                   |
| AL049780.3   | 0.602338679                            | N                                            | 0                                      | N                                   |
| SCUBE2       | 0.602664452                            | N                                            | 0                                      | N                                   |
| AC139795.1   | 0.602673605                            | N                                            | 0                                      | N                                   |
| ZNF503-AS1   | 0.602713748                            | N                                            | 0                                      | N                                   |
| CYP51A1      | 0.602810751                            | N                                            | 2                                      | N                                   |
| HHIPL1       | 0.602810751                            | N                                            | 1                                      | N                                   |
| AC112702.1   | 0.602853931                            | N                                            | 0                                      | N                                   |
| AL133215.2   | 0.602853931                            | N                                            | 0                                      | N                                   |
| DDO          | 0.602853931                            | N                                            | 1                                      | N                                   |
| HDDC3        | 0.602853931                            | N                                            | 0                                      | N                                   |
| MGAT4D       | 0.602853931                            | N                                            | 0                                      | N                                   |
| TMED5        | 0.602853931                            | N                                            | 0                                      | N                                   |
| Z99943.1     | 0.602853931                            | N                                            | 0                                      | N                                   |
| AC007610.4   | 0.602861819                            | N                                            | 0                                      | N                                   |
| AP000911.1   | 0.602861819                            | N                                            | 0                                      | N                                   |
| ARHGAP39     | 0.602861819                            | N                                            | 0                                      | N                                   |
| DERL1        | 0.602861819                            | N                                            | 1                                      | N                                   |
| ELOF1        | 0.602861819                            | N                                            | 0                                      | N                                   |
| FASTKD2      | 0.602861819                            | N                                            | 0                                      | N                                   |
| FSCN3        | 0.602861819                            | N                                            | 0                                      | N                                   |
| LINC01907    | 0.602861819                            | N                                            | 0                                      | N                                   |
| MYOD1        | 0.602861819                            | N                                            | 84                                     | N                                   |
| NRG2         | 0.602861819                            | N                                            | 1                                      | N                                   |
| SEZ6L2       | 0.602861819                            | N                                            | 1                                      | N                                   |
| TUBGCP4      | 0.602861819                            | N                                            | 0                                      | N                                   |
| STRADB       | 0.602875662                            | N                                            | 0                                      | N                                   |
| BMPR1A       | 0.602884232                            | N                                            | 13                                     | N                                   |
| APOLD1       | 0.603414145                            | N                                            | 0                                      | N                                   |
| ANKRD50      | 0.603489792                            | N                                            | 0                                      | N                                   |
| ACKR2        | 0.60367589                             | N                                            | 1                                      | N                                   |
| AC011487.2   | 0.603738248                            | N                                            | 0                                      | N                                   |

| Gene symbols | FDR (differential expression analysis) | Differentially expressed gene? Y, Yes; N, No | Number of insulin related publications | Insulin related gene? Y, Yes; N, No |
|--------------|----------------------------------------|----------------------------------------------|----------------------------------------|-------------------------------------|
| KBTBD6       | 0.603738248                            | N                                            | 0                                      | N                                   |
| MTMR4        | 0.603738248                            | N                                            | 0                                      | N                                   |
| SAMD5        | 0.603738248                            | N                                            | 0                                      | N                                   |
| STARD13-IT1  | 0.603738248                            | N                                            | 0                                      | N                                   |
| TCN2         | 0.603738248                            | N                                            | 1                                      | N                                   |
| ZNF385C      | 0.603738248                            | N                                            | 0                                      | N                                   |
| AL162311.2   | 0.603741256                            | N                                            | 0                                      | N                                   |
| SERBP1       | 0.603741256                            | N                                            | 0                                      | N                                   |
| FAR2P1       | 0.603789526                            | N                                            | 0                                      | N                                   |
| LINC00484    | 0.603789526                            | N                                            | 0                                      | N                                   |
| MPZL2        | 0.603981192                            | N                                            | 1                                      | N                                   |
| TOP3A        | 0.603981192                            | N                                            | 8                                      | N                                   |
| AC009166.2   | 0.60398267                             | N                                            | 0                                      | N                                   |
| KISS1R       | 0.60398267                             | N                                            | 17                                     | N                                   |
| MAP2K4       | 0.604069909                            | N                                            | 14                                     | N                                   |
| BEST4        | 0.604502862                            | N                                            | 0                                      | N                                   |
| FCRL5        | 0.604502862                            | N                                            | 1                                      | N                                   |
| FZD10        | 0.604502862                            | N                                            | 1                                      | N                                   |
| GTF2H5       | 0.604502862                            | N                                            | 0                                      | N                                   |
| INHBE        | 0.604502862                            | N                                            | 6                                      | N                                   |
| NEPRO        | 0.604502862                            | N                                            | 0                                      | N                                   |
| OFCC1        | 0.604502862                            | N                                            | 0                                      | N                                   |
| PRSS30P      | 0.604993335                            | N                                            | 0                                      | N                                   |
| DFFB         | 0.605230958                            | N                                            | 2                                      | N                                   |
| AC091825.1   | 0.605305325                            | N                                            | 0                                      | N                                   |
| AL591684.2   | 0.605305325                            | N                                            | 0                                      | N                                   |
| FAM49B       | 0.605305325                            | N                                            | 0                                      | N                                   |
| MRPL2P1      | 0.605305325                            | N                                            | 0                                      | N                                   |
| RN7SL471P    | 0.605305325                            | N                                            | 0                                      | N                                   |
| ZBED9        | 0.605305325                            | N                                            | 0                                      | N                                   |
| CFAP58-AS1   | 0.605311945                            | N                                            | 0                                      | N                                   |
| PRDM15       | 0.605311945                            | N                                            | 0                                      | N                                   |
| AC022098.1   | 0.605418701                            | N                                            | 0                                      | N                                   |
| AL359091.3   | 0.605418701                            | N                                            | 0                                      | N                                   |
| EEF1E1       | 0.605418701                            | N                                            | 0                                      | N                                   |
| PSME2        | 0.605418701                            | N                                            | 2                                      | N                                   |
| TRIM38       | 0.605418701                            | N                                            | 0                                      | N                                   |
| CYP1B1       | 0.605421648                            | N                                            | 15                                     | N                                   |
| IRF3         | 0.605452758                            | N                                            | 18                                     | N                                   |
| AL713998.2   | 0.605661988                            | N                                            | 0                                      | N                                   |
| AC233290.1   | 0.605726832                            | N                                            | 0                                      | N                                   |
| RIOX2        | 0.605917655                            | N                                            | 0                                      | N                                   |
| AC008467.1   | 0.60611841                             | N                                            | 0                                      | N                                   |
| AK2P2        | 0.60611841                             | N                                            | 0                                      | N                                   |
| EFNA4        | 0.606189423                            | N                                            | 1                                      | N                                   |
| NLRP6        | 0.606296602                            | N                                            | 1                                      | N                                   |
| NPM1P29      | 0.606296602                            | N                                            | 0                                      | N                                   |
| UTP20        | 0.606296602                            | N                                            | 0                                      | N                                   |
| ANP32A       | 0.606298409                            | N                                            | 2                                      | N                                   |
| RSRP1        | 0.606335307                            | N                                            | 0                                      | N                                   |
| AC108449.2   | 0.606369125                            | N                                            | 0                                      | N                                   |
| TBCAP1       | 0.606369125                            | N                                            | 0                                      | N                                   |
| CYP27A1      | 0.606381134                            | N                                            | 22                                     | N                                   |
| TRABD2A      | 0.606528387                            | N                                            | 0                                      | N                                   |
| AC128688.2   | 0.606577947                            | N                                            | 0                                      | N                                   |
| DCK          | 0.606654506                            | N                                            | 3                                      | N                                   |
| DOCK10       | 0.606654506                            | N                                            | 1                                      | N                                   |
| NXNP1        | 0.606654506                            | N                                            | 0                                      | N                                   |
| SYCE1L       | 0.606654506                            | N                                            | 0                                      | N                                   |
| AC008560.1   | 0.606680429                            | N                                            | 0                                      | N                                   |
| SMARCA5      | 0.606680429                            | N                                            | 1                                      | N                                   |
| AL117379.1   | 0.60681576                             | N                                            | 0                                      | N                                   |
| IFNGR2       | 0.60681576                             | N                                            | 2                                      | N                                   |
| INAFM2       | 0.60681576                             | N                                            | 0                                      | N                                   |
| MLLT11       | 0.60681576                             | N                                            | 0                                      | N                                   |
| CACNB2       | 0.606870679                            | N                                            | 3                                      | N                                   |

| Gene symbols | FDR (differential expression analysis) | Differentially expressed gene? Y, Yes; N, No | Number of insulin related publications | Insulin related gene? Y, Yes; N, No |
|--------------|----------------------------------------|----------------------------------------------|----------------------------------------|-------------------------------------|
| NKIRAS1      | 0.606870679                            | N                                            | 0                                      | N                                   |
| FBXO46       | 0.607045589                            | N                                            | 0                                      | N                                   |
| RUNX1        | 0.607045589                            | N                                            | 18                                     | N                                   |
| TRIP12       | 0.607045589                            | N                                            | 0                                      | N                                   |
| POMC         | 0.607399403                            | N                                            | 1000                                   | Y                                   |
| RNF219-AS1   | 0.607399403                            | N                                            | 0                                      | N                                   |
| ZNF774       | 0.607399403                            | N                                            | 0                                      | N                                   |
| PGM5P2       | 0.607466805                            | N                                            | 0                                      | N                                   |
| SNORA53      | 0.607466805                            | N                                            | 0                                      | N                                   |
| HLA-A        | 0.607479429                            | N                                            | 225                                    | Y                                   |
| CAVIN3       | 0.607480245                            | N                                            | 1                                      | N                                   |
| DDB1         | 0.607480245                            | N                                            | 6                                      | N                                   |
| RPL7A        | 0.607653299                            | N                                            | 0                                      | N                                   |
| SUB1         | 0.607653299                            | N                                            | 0                                      | N                                   |
| ING3         | 0.607659596                            | N                                            | 0                                      | N                                   |
| PLXNC1       | 0.607659596                            | N                                            | 0                                      | N                                   |
| TTC26        | 0.607659596                            | N                                            | 0                                      | N                                   |
| AC127459.1   | 0.607731837                            | N                                            | 0                                      | N                                   |
| KIAA1161     | 0.607731837                            | N                                            | 0                                      | N                                   |
| AC079062.1   | 0.607759532                            | N                                            | 0                                      | N                                   |
| AC079416.3   | 0.607759532                            | N                                            | 0                                      | N                                   |
| AC090204.1   | 0.607759532                            | N                                            | 0                                      | N                                   |
| AC127164.1   | 0.607759532                            | N                                            | 0                                      | N                                   |
| CDCA7        | 0.607759532                            | N                                            | 0                                      | N                                   |
| CYB5RL       | 0.607759532                            | N                                            | 0                                      | N                                   |
| DDX56        | 0.607759532                            | N                                            | 0                                      | N                                   |
| FOXI3        | 0.607759532                            | N                                            | 0                                      | N                                   |
| GATAD2B      | 0.607759532                            | N                                            | 0                                      | N                                   |
| LCN15        | 0.607759532                            | N                                            | 0                                      | N                                   |
| MANEA        | 0.607759532                            | N                                            | 2                                      | N                                   |
| RAB4A        | 0.607759532                            | N                                            | 11                                     | N                                   |
| SEPT2P1      | 0.607759532                            | N                                            | 0                                      | N                                   |
| SLC2A4RG     | 0.607759532                            | N                                            | 10                                     | N                                   |
| TNFSF14      | 0.607759532                            | N                                            | 11                                     | N                                   |
| TPTIP10      | 0.607759532                            | N                                            | 0                                      | N                                   |
| ABCC1        | 0.607888376                            | N                                            | 6                                      | N                                   |
| KAT2A        | 0.607888376                            | N                                            | 4                                      | N                                   |
| CPEB1-AS1    | 0.607970221                            | N                                            | 0                                      | N                                   |
| PHYHIP       | 0.607970221                            | N                                            | 0                                      | N                                   |
| GALNTL6      | 0.607988202                            | N                                            | 0                                      | N                                   |
| CPNE1        | 0.608003497                            | N                                            | 0                                      | N                                   |
| UGT3A1       | 0.608003497                            | N                                            | 1                                      | N                                   |
| AC131971.1   | 0.608064111                            | N                                            | 0                                      | N                                   |
| TUBB6        | 0.608078116                            | N                                            | 0                                      | N                                   |
| FAM103A2P    | 0.60812511                             | N                                            | 0                                      | N                                   |
| CDH22        | 0.608169739                            | N                                            | 0                                      | N                                   |
| AP001099.1   | 0.608460292                            | N                                            | 0                                      | N                                   |
| HIST1H3F     | 0.608506279                            | N                                            | 0                                      | N                                   |
| NSUN7        | 0.608506279                            | N                                            | 0                                      | N                                   |
| PWP2         | 0.608506279                            | N                                            | 0                                      | N                                   |
| RNF6         | 0.608620631                            | N                                            | 0                                      | N                                   |
| ID2          | 0.608662354                            | N                                            | 34                                     | N                                   |
| AL391121.1   | 0.608681642                            | N                                            | 0                                      | N                                   |
| GP6          | 0.608820466                            | N                                            | 1                                      | N                                   |
| RASSF8-AS1   | 0.608820466                            | N                                            | 0                                      | N                                   |
| AAED1        | 0.608884313                            | N                                            | 0                                      | N                                   |
| AL807761.2   | 0.608884313                            | N                                            | 0                                      | N                                   |
| C11orf87     | 0.608884313                            | N                                            | 0                                      | N                                   |
| CALM2P4      | 0.608884313                            | N                                            | 0                                      | N                                   |
| ITGA1        | 0.608884313                            | N                                            | 7                                      | N                                   |
| METTL1       | 0.608884313                            | N                                            | 1                                      | N                                   |
| SIRT2        | 0.608958655                            | N                                            | 47                                     | N                                   |
| CFAP97       | 0.609083033                            | N                                            | 0                                      | N                                   |
| MMS22L       | 0.609117344                            | N                                            | 0                                      | N                                   |
| NFKB1        | 0.609117344                            | N                                            | 34                                     | N                                   |
| RPL29P14     | 0.609303552                            | N                                            | 0                                      | N                                   |

| Gene symbols | FDR (differential expression analysis) | Differentially expressed gene? Y, Yes; N, No | Number of insulin related publications | Insulin related gene? Y, Yes; N, No |
|--------------|----------------------------------------|----------------------------------------------|----------------------------------------|-------------------------------------|
| C4orf36      | 0.609408792                            | N                                            | 0                                      | N                                   |
| AC107884.1   | 0.609436527                            | N                                            | 0                                      | N                                   |
| AC108073.1   | 0.609436527                            | N                                            | 0                                      | N                                   |
| ADCY8        | 0.609436527                            | N                                            | 4                                      | N                                   |
| AL590627.1   | 0.609436527                            | N                                            | 0                                      | N                                   |
| CDH20        | 0.609436527                            | N                                            | 0                                      | N                                   |
| EEF1G8       | 0.609436527                            | N                                            | 0                                      | N                                   |
| EPRS         | 0.609436527                            | N                                            | 6                                      | N                                   |
| FADS3        | 0.609436527                            | N                                            | 4                                      | N                                   |
| MTFR1L       | 0.609436527                            | N                                            | 0                                      | N                                   |
| NDNF         | 0.609436527                            | N                                            | 1                                      | N                                   |
| NIPSNAP2     | 0.609436527                            | N                                            | 0                                      | N                                   |
| PAPOLG       | 0.609436527                            | N                                            | 1                                      | N                                   |
| PHRF1        | 0.609436527                            | N                                            | 0                                      | N                                   |
| SEMA6C       | 0.609436527                            | N                                            | 0                                      | N                                   |
| TCTEX1D2     | 0.609436527                            | N                                            | 1                                      | N                                   |
| ZDHHC20P4    | 0.609436527                            | N                                            | 0                                      | N                                   |
| CHDH         | 0.609461051                            | N                                            | 0                                      | N                                   |
| ILF2P2       | 0.609461051                            | N                                            | 0                                      | N                                   |
| FMR1-IT1     | 0.609656482                            | N                                            | 0                                      | N                                   |
| GCSAM        | 0.60971301                             | N                                            | 0                                      | N                                   |
| MAGT1        | 0.60971301                             | N                                            | 1                                      | N                                   |
| NCK2         | 0.60971301                             | N                                            | 3                                      | N                                   |
| PARN         | 0.60971301                             | N                                            | 2                                      | N                                   |
| Z98200.1     | 0.60971301                             | N                                            | 0                                      | N                                   |
| AL162730.1   | 0.610159086                            | N                                            | 0                                      | N                                   |
| KSR2         | 0.610159086                            | N                                            | 8                                      | N                                   |
| SLC13A3      | 0.610159086                            | N                                            | 1                                      | N                                   |
| THBS4        | 0.610159086                            | N                                            | 2                                      | N                                   |
| USP22        | 0.610159086                            | N                                            | 0                                      | N                                   |
| PRMT5-AS1    | 0.610202733                            | N                                            | 0                                      | N                                   |
| PRR7-AS1     | 0.61058906                             | N                                            | 0                                      | N                                   |
| AC004908.2   | 0.610640291                            | N                                            | 0                                      | N                                   |
| AC007225.1   | 0.610640291                            | N                                            | 0                                      | N                                   |
| AC036214.3   | 0.610640291                            | N                                            | 0                                      | N                                   |
| ADAM11       | 0.610640291                            | N                                            | 1                                      | N                                   |
| AF131215.6   | 0.610640291                            | N                                            | 0                                      | N                                   |
| AL138799.1   | 0.610640291                            | N                                            | 0                                      | N                                   |
| CAPSL        | 0.610640291                            | N                                            | 0                                      | N                                   |
| COL4A3       | 0.610640291                            | N                                            | 1                                      | N                                   |
| DAP3         | 0.610640291                            | N                                            | 2                                      | N                                   |
| EML4         | 0.610640291                            | N                                            | 18                                     | N                                   |
| GALNT13      | 0.610640291                            | N                                            | 0                                      | N                                   |
| HMGN3        | 0.610640291                            | N                                            | 1                                      | N                                   |
| ISCU         | 0.610640291                            | N                                            | 0                                      | N                                   |
| NFATC2       | 0.610640291                            | N                                            | 14                                     | N                                   |
| RCN1         | 0.610640291                            | N                                            | 0                                      | N                                   |
| SMYD3        | 0.610640291                            | N                                            | 2                                      | N                                   |
| SUGT1P2      | 0.610640291                            | N                                            | 0                                      | N                                   |
| AC093323.1   | 0.610796648                            | N                                            | 0                                      | N                                   |
| CDC42SE1     | 0.610811169                            | N                                            | 0                                      | N                                   |
| HCN3         | 0.610858802                            | N                                            | 1                                      | N                                   |
| RALGAPA1P1   | 0.610858802                            | N                                            | 0                                      | N                                   |
| CCAT1        | 0.610990471                            | N                                            | 0                                      | N                                   |
| AC106791.1   | 0.611016455                            | N                                            | 0                                      | N                                   |
| ARHGAP10     | 0.611016455                            | N                                            | 0                                      | N                                   |
| ARSG         | 0.611016455                            | N                                            | 0                                      | N                                   |
| HIST1H3D     | 0.611016455                            | N                                            | 0                                      | N                                   |
| KRT223P      | 0.611040099                            | N                                            | 0                                      | N                                   |
| AC109329.1   | 0.61111276                             | N                                            | 0                                      | N                                   |
| AC010343.3   | 0.611231105                            | N                                            | 0                                      | N                                   |
| AC109779.1   | 0.611263925                            | N                                            | 0                                      | N                                   |
| AL117332.1   | 0.611263925                            | N                                            | 0                                      | N                                   |
| CPS1         | 0.611263925                            | N                                            | 5                                      | N                                   |
| HERC3        | 0.611263925                            | N                                            | 0                                      | N                                   |
| PTMA         | 0.611263925                            | N                                            | 3                                      | N                                   |

| Gene symbols | FDR (differential expression analysis) | Differentially expressed gene? Y, Yes; N, No | Number of insulin related publications | Insulin related gene? Y, Yes; N, No |
|--------------|----------------------------------------|----------------------------------------------|----------------------------------------|-------------------------------------|
| DNMT1        | 0.61141428                             | N                                            | 90                                     | N                                   |
| GAS6-AS2     | 0.61141428                             | N                                            | 0                                      | N                                   |
| HTT          | 0.61141428                             | N                                            | 57                                     | N                                   |
| LHFPL4       | 0.61141428                             | N                                            | 0                                      | N                                   |
| LINC02193    | 0.61141428                             | N                                            | 0                                      | N                                   |
| POFUT2       | 0.61141428                             | N                                            | 0                                      | N                                   |
| PRMT5P1      | 0.61141428                             | N                                            | 0                                      | N                                   |
| PSMD10P2     | 0.61141428                             | N                                            | 0                                      | N                                   |
| SIGLEC1      | 0.61141428                             | N                                            | 0                                      | N                                   |
| SPACA9       | 0.61141428                             | N                                            | 0                                      | N                                   |
| TMCO6        | 0.61141428                             | N                                            | 0                                      | N                                   |
| TXNDC12      | 0.61141428                             | N                                            | 2                                      | N                                   |
| Z98749.1     | 0.61141428                             | N                                            | 0                                      | N                                   |
| CCR4         | 0.611487052                            | N                                            | 17                                     | N                                   |
| SYPL2        | 0.611487052                            | N                                            | 0                                      | N                                   |
| CAPN1        | 0.6117572                              | N                                            | 8                                      | N                                   |
| GRK4         | 0.6117572                              | N                                            | 2                                      | N                                   |
| SLC7A8       | 0.61177559                             | N                                            | 4                                      | N                                   |
| SLC25A38P1   | 0.611837993                            | N                                            | 0                                      | N                                   |
| AC008026.3   | 0.611889129                            | N                                            | 0                                      | N                                   |
| AL121832.3   | 0.611889129                            | N                                            | 0                                      | N                                   |
| RN7SL48P     | 0.611889129                            | N                                            | 0                                      | N                                   |
| AASDH        | 0.612075301                            | N                                            | 0                                      | N                                   |
| HHLA2        | 0.612075301                            | N                                            | 0                                      | N                                   |
| HM13         | 0.612075301                            | N                                            | 0                                      | N                                   |
| KCNAB2       | 0.612075301                            | N                                            | 1                                      | N                                   |
| CACTIN       | 0.612126906                            | N                                            | 0                                      | N                                   |
| ATP5G1P6     | 0.612221039                            | N                                            | 0                                      | N                                   |
| DDX54        | 0.612221039                            | N                                            | 0                                      | N                                   |
| EEF1G2       | 0.612221039                            | N                                            | 0                                      | N                                   |
| MRPL58       | 0.612221039                            | N                                            | 0                                      | N                                   |
| LHPP         | 0.612258233                            | N                                            | 0                                      | N                                   |
| ARF5         | 0.612262104                            | N                                            | 2                                      | N                                   |
| CDKL3        | 0.612262104                            | N                                            | 0                                      | N                                   |
| FAM9C        | 0.612262104                            | N                                            | 0                                      | N                                   |
| ZNF337       | 0.612262104                            | N                                            | 0                                      | N                                   |
| ART3         | 0.612352192                            | N                                            | 2                                      | N                                   |
| AL138963.3   | 0.612452805                            | N                                            | 0                                      | N                                   |
| BBOF1        | 0.612452805                            | N                                            | 0                                      | N                                   |
| LYSMD1       | 0.612452805                            | N                                            | 0                                      | N                                   |
| TBC1D25      | 0.612452805                            | N                                            | 0                                      | N                                   |
| BLID         | 0.612617654                            | N                                            | 1                                      | N                                   |
| AC064799.2   | 0.612783467                            | N                                            | 0                                      | N                                   |
| SLC25A36     | 0.612783467                            | N                                            | 0                                      | N                                   |
| ZNF202       | 0.612783467                            | N                                            | 0                                      | N                                   |
| AC012181.3   | 0.612874568                            | N                                            | 0                                      | N                                   |
| AC087521.2   | 0.612874568                            | N                                            | 0                                      | N                                   |
| LZTS1        | 0.612874568                            | N                                            | 0                                      | N                                   |
| AL359710.1   | 0.612900269                            | N                                            | 0                                      | N                                   |
| AL022069.2   | 0.612905868                            | N                                            | 0                                      | N                                   |
| AP000892.3   | 0.612905868                            | N                                            | 0                                      | N                                   |
| LDHAP3       | 0.612905868                            | N                                            | 0                                      | N                                   |
| MAP4K2       | 0.612905868                            | N                                            | 0                                      | N                                   |
| AC026979.4   | 0.613026064                            | N                                            | 0                                      | N                                   |
| ISL2         | 0.613026064                            | N                                            | 18                                     | N                                   |
| ADA          | 0.613034588                            | N                                            | 529                                    | Y                                   |
| GDF11        | 0.613034588                            | N                                            | 12                                     | N                                   |
| GTF3C3       | 0.613227375                            | N                                            | 0                                      | N                                   |
| AC231533.2   | 0.613444973                            | N                                            | 0                                      | N                                   |
| AAAS         | 0.613534829                            | N                                            | 23                                     | N                                   |
| AC034232.1   | 0.613534829                            | N                                            | 0                                      | N                                   |
| AL049874.3   | 0.613534829                            | N                                            | 0                                      | N                                   |
| AL136981.1   | 0.613534829                            | N                                            | 0                                      | N                                   |
| ARHGAP17     | 0.613534829                            | N                                            | 0                                      | N                                   |
| CD83         | 0.613534829                            | N                                            | 12                                     | N                                   |
| HES7         | 0.613534829                            | N                                            | 0                                      | N                                   |

| Gene symbols  | FDR (differential expression analysis) | Differentially expressed gene? Y, Yes; N, No | Number of insulin related publications | Insulin related gene? Y, Yes; N, No |
|---------------|----------------------------------------|----------------------------------------------|----------------------------------------|-------------------------------------|
| PAFAH2        | 0.613534829                            | N                                            | 0                                      | N                                   |
| PRG2          | 0.613534829                            | N                                            | 0                                      | N                                   |
| RAB11FIP5     | 0.613534829                            | N                                            | 0                                      | N                                   |
| RAB4B         | 0.613534829                            | N                                            | 5                                      | N                                   |
| RPS7P11       | 0.613534829                            | N                                            | 0                                      | N                                   |
| TPT1P4        | 0.613534829                            | N                                            | 0                                      | N                                   |
| NCOA4P2       | 0.613577004                            | N                                            | 0                                      | N                                   |
| AC017013.1    | 0.613779971                            | N                                            | 0                                      | N                                   |
| HS3ST3A1      | 0.613865417                            | N                                            | 0                                      | N                                   |
| AATBC         | 0.613991557                            | N                                            | 0                                      | N                                   |
| AC008543.1    | 0.613991557                            | N                                            | 0                                      | N                                   |
| AC015849.4    | 0.613991557                            | N                                            | 0                                      | N                                   |
| AC099494.1    | 0.613991557                            | N                                            | 0                                      | N                                   |
| AC117409.1    | 0.613991557                            | N                                            | 0                                      | N                                   |
| AC140479.3    | 0.613991557                            | N                                            | 0                                      | N                                   |
| AL022313.1    | 0.613991557                            | N                                            | 0                                      | N                                   |
| AL049873.1    | 0.613991557                            | N                                            | 0                                      | N                                   |
| ANG           | 0.613991557                            | N                                            | 893                                    | Y                                   |
| ATP6V1G1      | 0.613991557                            | N                                            | 0                                      | N                                   |
| AURKAIP1      | 0.613991557                            | N                                            | 0                                      | N                                   |
| CDC42BPG      | 0.613991557                            | N                                            | 0                                      | N                                   |
| CHIC1         | 0.613991557                            | N                                            | 0                                      | N                                   |
| COPZ1         | 0.613991557                            | N                                            | 1                                      | N                                   |
| DPH3P1        | 0.613991557                            | N                                            | 0                                      | N                                   |
| FBXW7         | 0.613991557                            | N                                            | 13                                     | N                                   |
| HSD17B8       | 0.613991557                            | N                                            | 0                                      | N                                   |
| ILVBL         | 0.613991557                            | N                                            | 0                                      | N                                   |
| LMAN1         | 0.613991557                            | N                                            | 2                                      | N                                   |
| LRIG3         | 0.613991557                            | N                                            | 2                                      | N                                   |
| MAG11         | 0.613991557                            | N                                            | 1                                      | N                                   |
| MBLAC1        | 0.613991557                            | N                                            | 0                                      | N                                   |
| MSX2          | 0.613991557                            | N                                            | 16                                     | N                                   |
| PSMD8         | 0.613991557                            | N                                            | 0                                      | N                                   |
| QPCTL         | 0.613991557                            | N                                            | 2                                      | N                                   |
| SLC22A8       | 0.613991557                            | N                                            | 4                                      | N                                   |
| SYNC          | 0.613991557                            | N                                            | 5                                      | N                                   |
| TMEM187       | 0.613991557                            | N                                            | 0                                      | N                                   |
| TRIM39-RPP21  | 0.613991557                            | N                                            | 0                                      | N                                   |
| ATAD5         | 0.614173918                            | N                                            | 0                                      | N                                   |
| MIR7515HG     | 0.614173918                            | N                                            | 0                                      | N                                   |
| NDUFV3        | 0.614173918                            | N                                            | 0                                      | N                                   |
| OXCT2P1       | 0.614173918                            | N                                            | 0                                      | N                                   |
| AC004877.2    | 0.614264786                            | N                                            | 0                                      | N                                   |
| OCIAD1        | 0.614264786                            | N                                            | 0                                      | N                                   |
| CLTCL1        | 0.614315908                            | N                                            | 6                                      | N                                   |
| DCAF8L1       | 0.614315908                            | N                                            | 0                                      | N                                   |
| DHFRP1        | 0.614315908                            | N                                            | 0                                      | N                                   |
| GPT2          | 0.614315908                            | N                                            | 3                                      | N                                   |
| MTERF3        | 0.614315908                            | N                                            | 0                                      | N                                   |
| PIGBOS1       | 0.614315908                            | N                                            | 0                                      | N                                   |
| PRPH2         | 0.614315908                            | N                                            | 0                                      | N                                   |
| SNX25P1       | 0.614315908                            | N                                            | 0                                      | N                                   |
| STON1-GTF2A1L | 0.614315908                            | N                                            | 1                                      | N                                   |
| ZBTB45        | 0.614315908                            | N                                            | 0                                      | N                                   |
| AP003068.4    | 0.614452984                            | N                                            | 0                                      | N                                   |
| ARHGAP24      | 0.614452984                            | N                                            | 0                                      | N                                   |
| MIEF1         | 0.614452984                            | N                                            | 0                                      | N                                   |
| MTG2          | 0.61448126                             | N                                            | 0                                      | N                                   |
| OVGP1         | 0.61448126                             | N                                            | 4                                      | N                                   |
| VWA2          | 0.61448126                             | N                                            | 1                                      | N                                   |
| WASF2         | 0.61448126                             | N                                            | 6                                      | N                                   |
| ZNF865        | 0.61448126                             | N                                            | 0                                      | N                                   |
| NOL8P1        | 0.6148138                              | N                                            | 0                                      | N                                   |
| TECRL         | 0.614914314                            | N                                            | 1                                      | N                                   |
| AC009712.1    | 0.614916436                            | N                                            | 0                                      | N                                   |
| C3orf35       | 0.615055868                            | N                                            | 0                                      | N                                   |



| Gene symbols | FDR (differential expression analysis) | Differentially expressed gene? Y, Yes; N, No | Number of insulin related publications | Insulin related gene? Y, Yes; N, No |
|--------------|----------------------------------------|----------------------------------------------|----------------------------------------|-------------------------------------|
| AES          | 0.615162265                            | N                                            | 207                                    | Y                                   |
| CACNA2D1     | 0.615162265                            | N                                            | 3                                      | N                                   |
| ABCF3        | 0.615175005                            | N                                            | 0                                      | N                                   |
| NEMP2        | 0.615175005                            | N                                            | 0                                      | N                                   |
| PCDHGB6      | 0.615175005                            | N                                            | 0                                      | N                                   |
| RCC2P8       | 0.615175005                            | N                                            | 0                                      | N                                   |
| TMEM161BP1   | 0.615175005                            | N                                            | 0                                      | N                                   |
| TUBB         | 0.615175005                            | N                                            | 4                                      | N                                   |
| ATP7B        | 0.615599266                            | N                                            | 5                                      | N                                   |
| C9orf85      | 0.615658184                            | N                                            | 0                                      | N                                   |
| NARF         | 0.615658184                            | N                                            | 0                                      | N                                   |
| TBC1D10B     | 0.615785717                            | N                                            | 0                                      | N                                   |
| AC007000.2   | 0.615856368                            | N                                            | 0                                      | N                                   |
| TP53INP2     | 0.615856368                            | N                                            | 4                                      | N                                   |
| ANKRD20A3    | 0.616097288                            | N                                            | 0                                      | N                                   |
| ZNF687       | 0.616097288                            | N                                            | 0                                      | N                                   |
| AC087284.1   | 0.616228339                            | N                                            | 0                                      | N                                   |
| HS6ST1       | 0.616301022                            | N                                            | 0                                      | N                                   |
| PCDHGA3      | 0.616301022                            | N                                            | 0                                      | N                                   |
| AP004609.3   | 0.616371687                            | N                                            | 0                                      | N                                   |
| FANCE        | 0.616371687                            | N                                            | 0                                      | N                                   |
| AC027307.2   | 0.616407083                            | N                                            | 0                                      | N                                   |
| ATP5F1P7     | 0.616407083                            | N                                            | 0                                      | N                                   |
| CROCC        | 0.616407083                            | N                                            | 0                                      | N                                   |
| KDEL2        | 0.616407083                            | N                                            | 1                                      | N                                   |
| PKMP2        | 0.616407083                            | N                                            | 0                                      | N                                   |
| ZNF165       | 0.616407083                            | N                                            | 0                                      | N                                   |
| PODXL2       | 0.616479324                            | N                                            | 0                                      | N                                   |
| PYGM         | 0.616645793                            | N                                            | 10                                     | N                                   |
| AP001029.2   | 0.616757793                            | N                                            | 0                                      | N                                   |
| SHQ1P1       | 0.616771695                            | N                                            | 0                                      | N                                   |
| AC010168.2   | 0.616898465                            | N                                            | 0                                      | N                                   |
| AC026241.1   | 0.617054749                            | N                                            | 0                                      | N                                   |
| AC112203.1   | 0.617054749                            | N                                            | 0                                      | N                                   |
| AL136040.2   | 0.617054749                            | N                                            | 0                                      | N                                   |
| AP001453.2   | 0.617054749                            | N                                            | 0                                      | N                                   |
| C6orf183     | 0.617054749                            | N                                            | 0                                      | N                                   |
| CDC42EP2     | 0.617054749                            | N                                            | 0                                      | N                                   |
| ERICH5       | 0.617054749                            | N                                            | 0                                      | N                                   |
| GDF15        | 0.617054749                            | N                                            | 52                                     | N                                   |
| GOPC         | 0.617054749                            | N                                            | 3                                      | N                                   |
| HACD4        | 0.617054749                            | N                                            | 0                                      | N                                   |
| KAT2B        | 0.617054749                            | N                                            | 5                                      | N                                   |
| KRT10        | 0.617054749                            | N                                            | 1                                      | N                                   |
| LINC01814    | 0.617054749                            | N                                            | 0                                      | N                                   |
| TMA16P1      | 0.617054749                            | N                                            | 0                                      | N                                   |
| WASHC4       | 0.617054749                            | N                                            | 0                                      | N                                   |
| AC027796.2   | 0.617078835                            | N                                            | 0                                      | N                                   |
| AC110768.2   | 0.617078835                            | N                                            | 0                                      | N                                   |
| AP001357.2   | 0.617078835                            | N                                            | 0                                      | N                                   |
| ARHGDIB      | 0.617078835                            | N                                            | 0                                      | N                                   |
| CLTB         | 0.617078835                            | N                                            | 0                                      | N                                   |
| DDX10        | 0.617078835                            | N                                            | 0                                      | N                                   |
| EPS15L1      | 0.617078835                            | N                                            | 0                                      | N                                   |
| KTI12        | 0.617078835                            | N                                            | 0                                      | N                                   |
| MTMR1        | 0.617078835                            | N                                            | 1                                      | N                                   |
| CYTH3        | 0.61709145                             | N                                            | 1                                      | N                                   |
| DNM1P46      | 0.61709145                             | N                                            | 0                                      | N                                   |
| HSD17B10     | 0.61709145                             | N                                            | 5                                      | N                                   |
| LRP5L        | 0.61709145                             | N                                            | 0                                      | N                                   |
| AC069503.2   | 0.617218716                            | N                                            | 0                                      | N                                   |
| TXNDC15      | 0.617218716                            | N                                            | 0                                      | N                                   |
| AC090772.3   | 0.617305705                            | N                                            | 0                                      | N                                   |
| CALM3        | 0.617305705                            | N                                            | 1                                      | N                                   |
| AC005189.1   | 0.617441907                            | N                                            | 0                                      | N                                   |
| AC008966.1   | 0.617441907                            | N                                            | 0                                      | N                                   |

| Gene symbols | FDR (differential expression analysis) | Differentially expressed gene? Y, Yes; N, No | Number of insulin related publications | Insulin related gene? Y, Yes; N, No |
|--------------|----------------------------------------|----------------------------------------------|----------------------------------------|-------------------------------------|
| AC073869.3   | 0.617441907                            | N                                            | 0                                      | N                                   |
| AL391863.1   | 0.617441907                            | N                                            | 0                                      | N                                   |
| CCNG1        | 0.617441907                            | N                                            | 11                                     | N                                   |
| CEP83        | 0.617441907                            | N                                            | 0                                      | N                                   |
| CROCCP1      | 0.617441907                            | N                                            | 0                                      | N                                   |
| CSNK1A1P1    | 0.617441907                            | N                                            | 0                                      | N                                   |
| DYRK1A       | 0.617441907                            | N                                            | 25                                     | N                                   |
| ELL2P1       | 0.617441907                            | N                                            | 0                                      | N                                   |
| FERMT2       | 0.617441907                            | N                                            | 1                                      | N                                   |
| GRPEL1       | 0.617441907                            | N                                            | 0                                      | N                                   |
| IKBIP        | 0.617441907                            | N                                            | 0                                      | N                                   |
| LBX2-AS1     | 0.617441907                            | N                                            | 0                                      | N                                   |
| NUGGC        | 0.617441907                            | N                                            | 0                                      | N                                   |
| PIGX         | 0.617441907                            | N                                            | 0                                      | N                                   |
| SLC8B1       | 0.617441907                            | N                                            | 1                                      | N                                   |
| SLC9A9       | 0.617441907                            | N                                            | 0                                      | N                                   |
| SNRNP48      | 0.617441907                            | N                                            | 0                                      | N                                   |
| SORBS2       | 0.617441907                            | N                                            | 2                                      | N                                   |
| SYP          | 0.617441907                            | N                                            | 61                                     | N                                   |
| SYT14        | 0.617441907                            | N                                            | 0                                      | N                                   |
| CDKL5        | 0.61748043                             | N                                            | 2                                      | N                                   |
| CLCN3P1      | 0.61748043                             | N                                            | 0                                      | N                                   |
| FCF1P7       | 0.61748043                             | N                                            | 0                                      | N                                   |
| IPO9         | 0.61748043                             | N                                            | 0                                      | N                                   |
| LAG3         | 0.61748043                             | N                                            | 5                                      | N                                   |
| PARP11       | 0.61748043                             | N                                            | 0                                      | N                                   |
| PDF          | 0.61748043                             | N                                            | 95                                     | N                                   |
| AL139384.2   | 0.617527288                            | N                                            | 0                                      | N                                   |
| LINC00976    | 0.617527288                            | N                                            | 0                                      | N                                   |
| NKX3-1       | 0.617527288                            | N                                            | 8                                      | N                                   |
| PAN3         | 0.617527288                            | N                                            | 0                                      | N                                   |
| DBR1         | 0.617543897                            | N                                            | 0                                      | N                                   |
| DTX4         | 0.617819987                            | N                                            | 0                                      | N                                   |
| ZNF726       | 0.617819987                            | N                                            | 0                                      | N                                   |
| IMPAD1       | 0.617831409                            | N                                            | 0                                      | N                                   |
| GPN1         | 0.617869973                            | N                                            | 0                                      | N                                   |
| IGFBP4       | 0.61826359                             | N                                            | 135                                    | Y                                   |
| PSMB4        | 0.61826359                             | N                                            | 1                                      | N                                   |
| AC009996.1   | 0.618545879                            | N                                            | 0                                      | N                                   |
| C10orf90     | 0.618545879                            | N                                            | 1                                      | N                                   |
| CCL2         | 0.618545879                            | N                                            | 818                                    | Y                                   |
| CTNNAL1      | 0.618545879                            | N                                            | 0                                      | N                                   |
| FOXE3        | 0.618545879                            | N                                            | 0                                      | N                                   |
| HLTF         | 0.618688337                            | N                                            | 5                                      | N                                   |
| GEMIN5       | 0.618693798                            | N                                            | 0                                      | N                                   |
| COMMD3       | 0.618713685                            | N                                            | 0                                      | N                                   |
| MRPL45P2     | 0.618713685                            | N                                            | 0                                      | N                                   |
| SF3B1        | 0.618713685                            | N                                            | 0                                      | N                                   |
| TMEM91       | 0.618806726                            | N                                            | 0                                      | N                                   |
| AC018809.1   | 0.618859519                            | N                                            | 0                                      | N                                   |
| LRRC14       | 0.618859519                            | N                                            | 0                                      | N                                   |
| MRPL35P2     | 0.618859519                            | N                                            | 0                                      | N                                   |
| AL355488.2   | 0.619005473                            | N                                            | 0                                      | N                                   |
| ALAS1        | 0.619005473                            | N                                            | 5                                      | N                                   |
| PAPPA-AS1    | 0.619005473                            | N                                            | 0                                      | N                                   |
| TMEM219      | 0.619279533                            | N                                            | 2                                      | N                                   |
| MICB         | 0.619430857                            | N                                            | 1                                      | N                                   |
| SYNE4        | 0.619430857                            | N                                            | 0                                      | N                                   |
| AC245054.2   | 0.61952598                             | N                                            | 0                                      | N                                   |
| RNLS         | 0.61952598                             | N                                            | 2                                      | N                                   |
| TMA16P2      | 0.61952598                             | N                                            | 0                                      | N                                   |
| AC011716.1   | 0.619698999                            | N                                            | 0                                      | N                                   |
| ATG14        | 0.619757905                            | N                                            | 7                                      | N                                   |
| LYRM2        | 0.619757905                            | N                                            | 0                                      | N                                   |
| AL451085.2   | 0.619812901                            | N                                            | 0                                      | N                                   |
| ABCB1        | 0.619891887                            | N                                            | 22                                     | N                                   |

| Gene symbols | FDR (differential expression analysis) | Differentially expressed gene? Y, Yes; N, No | Number of insulin related publications | Insulin related gene? Y, Yes; N, No |
|--------------|----------------------------------------|----------------------------------------------|----------------------------------------|-------------------------------------|
| AC008608.2   | 0.619891887                            | N                                            | 0                                      | N                                   |
| AC009078.3   | 0.619891887                            | N                                            | 0                                      | N                                   |
| AC068533.1   | 0.619891887                            | N                                            | 0                                      | N                                   |
| DCAF13P3     | 0.619891887                            | N                                            | 0                                      | N                                   |
| PDE4D        | 0.619891887                            | N                                            | 10                                     | N                                   |
| RPL35P6      | 0.619891887                            | N                                            | 0                                      | N                                   |
| SCARNA3      | 0.619891887                            | N                                            | 0                                      | N                                   |
| TRIM33       | 0.620139615                            | N                                            | 0                                      | N                                   |
| UNC50        | 0.620139615                            | N                                            | 0                                      | N                                   |
| AL356055.1   | 0.620150368                            | N                                            | 0                                      | N                                   |
| UPK1B        | 0.620150368                            | N                                            | 1                                      | N                                   |
| RALGAPA1     | 0.620399559                            | N                                            | 1                                      | N                                   |
| CREBL2       | 0.620407945                            | N                                            | 0                                      | N                                   |
| AC004967.1   | 0.62100386                             | N                                            | 0                                      | N                                   |
| AC093426.1   | 0.62100386                             | N                                            | 0                                      | N                                   |
| AC096644.4   | 0.62100386                             | N                                            | 0                                      | N                                   |
| ACSBG1       | 0.62100386                             | N                                            | 1                                      | N                                   |
| ADAMTSL3     | 0.62100386                             | N                                            | 2                                      | N                                   |
| APOB         | 0.62100386                             | N                                            | 1000                                   | Y                                   |
| B3GNT9       | 0.62100386                             | N                                            | 0                                      | N                                   |
| C12orf65     | 0.62100386                             | N                                            | 0                                      | N                                   |
| F2R          | 0.62100386                             | N                                            | 4                                      | N                                   |
| KCNQ5-IT1    | 0.62100386                             | N                                            | 0                                      | N                                   |
| LINC01087    | 0.62100386                             | N                                            | 0                                      | N                                   |
| LRRC14B      | 0.62100386                             | N                                            | 0                                      | N                                   |
| MARVELD2     | 0.62100386                             | N                                            | 1                                      | N                                   |
| MCUR1        | 0.62100386                             | N                                            | 0                                      | N                                   |
| OTUD4        | 0.62100386                             | N                                            | 0                                      | N                                   |
| SLC28A2      | 0.62100386                             | N                                            | 2                                      | N                                   |
| TRMO         | 0.62100386                             | N                                            | 0                                      | N                                   |
| ZBTB12       | 0.62100386                             | N                                            | 0                                      | N                                   |
| C1orf132     | 0.621124413                            | N                                            | 0                                      | N                                   |
| PPP2R2D      | 0.621124413                            | N                                            | 0                                      | N                                   |
| SLC7A6       | 0.621176634                            | N                                            | 0                                      | N                                   |
| CISD2        | 0.621260898                            | N                                            | 7                                      | N                                   |
| AC092718.7   | 0.621321634                            | N                                            | 0                                      | N                                   |
| AC007458.1   | 0.621453481                            | N                                            | 0                                      | N                                   |
| AC108860.2   | 0.621453481                            | N                                            | 0                                      | N                                   |
| HSD17B7P2    | 0.621453481                            | N                                            | 0                                      | N                                   |
| KCNK1        | 0.621453481                            | N                                            | 0                                      | N                                   |
| THAP1        | 0.621453481                            | N                                            | 0                                      | N                                   |
| THAP6        | 0.621453481                            | N                                            | 0                                      | N                                   |
| LHX1         | 0.621500335                            | N                                            | 12                                     | N                                   |
| TMEM185B     | 0.621500335                            | N                                            | 0                                      | N                                   |
| LRRC41       | 0.621526542                            | N                                            | 0                                      | N                                   |
| MAP1B        | 0.621526542                            | N                                            | 5                                      | N                                   |
| AC011815.2   | 0.621544505                            | N                                            | 0                                      | N                                   |
| LFNG         | 0.621544505                            | N                                            | 1                                      | N                                   |
| MB21D1       | 0.621544505                            | N                                            | 2                                      | N                                   |
| COL6A4P1     | 0.621702649                            | N                                            | 0                                      | N                                   |
| EIF3H        | 0.621702649                            | N                                            | 0                                      | N                                   |
| PEAR1        | 0.621702649                            | N                                            | 0                                      | N                                   |
| PLEKHJ1      | 0.621702649                            | N                                            | 0                                      | N                                   |
| DSC2         | 0.621855521                            | N                                            | 1                                      | N                                   |
| LCTL         | 0.621855521                            | N                                            | 0                                      | N                                   |
| CSRNP3       | 0.621860618                            | N                                            | 0                                      | N                                   |
| MICU1        | 0.621860618                            | N                                            | 2                                      | N                                   |
| MYO3A        | 0.621860618                            | N                                            | 0                                      | N                                   |
| AC027612.3   | 0.621881283                            | N                                            | 0                                      | N                                   |
| AC091152.4   | 0.621881283                            | N                                            | 0                                      | N                                   |
| CTA-342B11.3 | 0.621931851                            | N                                            | 0                                      | N                                   |
| FBXL6        | 0.621950854                            | N                                            | 0                                      | N                                   |
| AL049840.6   | 0.621961678                            | N                                            | 0                                      | N                                   |
| AP000593.1   | 0.621961678                            | N                                            | 0                                      | N                                   |
| AR           | 0.621961678                            | N                                            | 1000                                   | Y                                   |
| BAIAP2L1     | 0.621961678                            | N                                            | 3                                      | N                                   |

| Gene symbols | FDR (differential expression analysis) | Differentially expressed gene? Y, Yes; N, No | Number of insulin related publications | Insulin related gene? Y, Yes; N, No |
|--------------|----------------------------------------|----------------------------------------------|----------------------------------------|-------------------------------------|
| CYB5R1       | 0.621961678                            | N                                            | 0                                      | N                                   |
| DDN          | 0.621961678                            | N                                            | 2                                      | N                                   |
| E2F8         | 0.621961678                            | N                                            | 3                                      | N                                   |
| FAAH         | 0.621961678                            | N                                            | 34                                     | N                                   |
| LINC01733    | 0.621961678                            | N                                            | 0                                      | N                                   |
| MAGI2-AS3    | 0.621961678                            | N                                            | 0                                      | N                                   |
| MAPK6        | 0.621961678                            | N                                            | 9                                      | N                                   |
| MEF2D        | 0.621961678                            | N                                            | 19                                     | N                                   |
| MZF1-AS1     | 0.621961678                            | N                                            | 0                                      | N                                   |
| RBM10        | 0.621961678                            | N                                            | 0                                      | N                                   |
| RPS3AP6      | 0.621961678                            | N                                            | 0                                      | N                                   |
| TSR1         | 0.621961678                            | N                                            | 0                                      | N                                   |
| AC018645.2   | 0.622165597                            | N                                            | 0                                      | N                                   |
| AC023157.1   | 0.622165597                            | N                                            | 0                                      | N                                   |
| AC058823.1   | 0.622165597                            | N                                            | 0                                      | N                                   |
| AC112484.2   | 0.622165597                            | N                                            | 0                                      | N                                   |
| ATP5JP1      | 0.622165597                            | N                                            | 0                                      | N                                   |
| AURKC        | 0.622165597                            | N                                            | 0                                      | N                                   |
| CATSPER1     | 0.622165597                            | N                                            | 1                                      | N                                   |
| GFOD2        | 0.622165597                            | N                                            | 1                                      | N                                   |
| NUP50-AS1    | 0.622165597                            | N                                            | 0                                      | N                                   |
| ZMYND15      | 0.622165597                            | N                                            | 0                                      | N                                   |
| CNOT6L       | 0.622195602                            | N                                            | 2                                      | N                                   |
| PAFAH1B3     | 0.622195602                            | N                                            | 1                                      | N                                   |
| ZNF821       | 0.622195602                            | N                                            | 0                                      | N                                   |
| RTN3P1       | 0.622315679                            | N                                            | 0                                      | N                                   |
| GAREM2       | 0.622403343                            | N                                            | 1                                      | N                                   |
| HMCN2        | 0.622403343                            | N                                            | 0                                      | N                                   |
| AC133548.2   | 0.622494558                            | N                                            | 0                                      | N                                   |
| TYK2         | 0.622837265                            | N                                            | 38                                     | N                                   |
| AC002350.2   | 0.623092989                            | N                                            | 0                                      | N                                   |
| AC007375.1   | 0.623229075                            | N                                            | 0                                      | N                                   |
| ARHGEF6      | 0.623229075                            | N                                            | 0                                      | N                                   |
| PPP1R32      | 0.623286279                            | N                                            | 0                                      | N                                   |
| SHROOM2      | 0.623294571                            | N                                            | 0                                      | N                                   |
| AC007256.1   | 0.623355797                            | N                                            | 0                                      | N                                   |
| AC005840.5   | 0.623511993                            | N                                            | 0                                      | N                                   |
| COQ5         | 0.623511993                            | N                                            | 1                                      | N                                   |
| PRPF38A      | 0.623511993                            | N                                            | 0                                      | N                                   |
| ZNF574       | 0.623511993                            | N                                            | 0                                      | N                                   |
| AC006566.1   | 0.623628707                            | N                                            | 0                                      | N                                   |
| GRM2         | 0.623628707                            | N                                            | 1                                      | N                                   |
| MRPS2        | 0.624021826                            | N                                            | 0                                      | N                                   |
| RBM33        | 0.624155311                            | N                                            | 1                                      | N                                   |
| TNNT2        | 0.624180854                            | N                                            | 7                                      | N                                   |
| AL133243.4   | 0.624209484                            | N                                            | 0                                      | N                                   |
| RPP21        | 0.624209484                            | N                                            | 0                                      | N                                   |
| SLFN13       | 0.624405517                            | N                                            | 0                                      | N                                   |
| TSC22D2      | 0.624405517                            | N                                            | 0                                      | N                                   |
| AC012594.1   | 0.624475778                            | N                                            | 0                                      | N                                   |
| AL512353.1   | 0.624475778                            | N                                            | 0                                      | N                                   |
| CPNE6        | 0.624475778                            | N                                            | 1                                      | N                                   |
| RBM17        | 0.624475778                            | N                                            | 0                                      | N                                   |
| SPIN4        | 0.624475778                            | N                                            | 0                                      | N                                   |
| VMO1         | 0.624475778                            | N                                            | 0                                      | N                                   |
| ZNF454       | 0.624475778                            | N                                            | 0                                      | N                                   |
| AC245297.3   | 0.624645803                            | N                                            | 0                                      | N                                   |
| AL356124.2   | 0.624745985                            | N                                            | 0                                      | N                                   |
| DNAH8        | 0.624767135                            | N                                            | 0                                      | N                                   |
| EPM2A        | 0.624847991                            | N                                            | 6                                      | N                                   |
| BAK1         | 0.624851859                            | N                                            | 19                                     | N                                   |
| DAND5        | 0.624851859                            | N                                            | 0                                      | N                                   |
| NUP62        | 0.624851859                            | N                                            | 1                                      | N                                   |
| ILF3-AS1     | 0.625057781                            | N                                            | 0                                      | N                                   |
| KHDRBS3      | 0.625057781                            | N                                            | 0                                      | N                                   |
| RN7SKP234    | 0.625057781                            | N                                            | 0                                      | N                                   |

| Gene symbols | FDR (differential expression analysis) | Differentially expressed gene? Y, Yes; N, No | Number of insulin related publications | Insulin related gene? Y, Yes; N, No |
|--------------|----------------------------------------|----------------------------------------------|----------------------------------------|-------------------------------------|
| BCAT1        | 0.625142892                            | N                                            | 11                                     | N                                   |
| DYSF         | 0.625142892                            | N                                            | 6                                      | N                                   |
| PTPN2P1      | 0.625142892                            | N                                            | 0                                      | N                                   |
| SLC11A1      | 0.625142892                            | N                                            | 5                                      | N                                   |
| AATK         | 0.62521717                             | N                                            | 5                                      | N                                   |
| SLC2A1-AS1   | 0.625346316                            | N                                            | 0                                      | N                                   |
| PITPNM2      | 0.625375025                            | N                                            | 0                                      | N                                   |
| RASAL3       | 0.625375025                            | N                                            | 0                                      | N                                   |
| MARC1        | 0.625672795                            | N                                            | 1                                      | N                                   |
| C1orf131     | 0.625672795                            | N                                            | 0                                      | N                                   |
| PLEKHA5      | 0.625672795                            | N                                            | 1                                      | N                                   |
| ZNF212       | 0.625672795                            | N                                            | 0                                      | N                                   |
| LINC02340    | 0.625720774                            | N                                            | 0                                      | N                                   |
| LYPLA1P3     | 0.625720774                            | N                                            | 0                                      | N                                   |
| RNF126       | 0.625720774                            | N                                            | 1                                      | N                                   |
| AC002558.1   | 0.625783081                            | N                                            | 0                                      | N                                   |
| ATP6V1G2     | 0.625806918                            | N                                            | 0                                      | N                                   |
| EEF1AKMT2    | 0.625806918                            | N                                            | 0                                      | N                                   |
| SUGT1P3      | 0.625806918                            | N                                            | 0                                      | N                                   |
| C2orf42      | 0.625838734                            | N                                            | 0                                      | N                                   |
| AL353796.1   | 0.625914645                            | N                                            | 0                                      | N                                   |
| SH3BGRL2     | 0.625981491                            | N                                            | 0                                      | N                                   |
| LRRC10B      | 0.626190294                            | N                                            | 1                                      | N                                   |
| TDGF1P3      | 0.626190294                            | N                                            | 0                                      | N                                   |
| C8orf44      | 0.626361349                            | N                                            | 0                                      | N                                   |
| PLCL1        | 0.626361349                            | N                                            | 0                                      | N                                   |
| PTGES3       | 0.626361349                            | N                                            | 0                                      | N                                   |
| CHAF1B       | 0.626380408                            | N                                            | 0                                      | N                                   |
| DDX27        | 0.626380408                            | N                                            | 0                                      | N                                   |
| ZNF839       | 0.626380408                            | N                                            | 0                                      | N                                   |
| AC026150.3   | 0.626384227                            | N                                            | 0                                      | N                                   |
| OR7D2        | 0.626384227                            | N                                            | 0                                      | N                                   |
| TRAPPC2      | 0.626384227                            | N                                            | 0                                      | N                                   |
| DPF3         | 0.626484189                            | N                                            | 1                                      | N                                   |
| PET100       | 0.626497171                            | N                                            | 0                                      | N                                   |
| AC002480.2   | 0.626744797                            | N                                            | 0                                      | N                                   |
| NR2F2        | 0.626744797                            | N                                            | 17                                     | N                                   |
| EDN1         | 0.626787984                            | N                                            | 8                                      | N                                   |
| AC124242.1   | 0.626815614                            | N                                            | 0                                      | N                                   |
| FAM206BP     | 0.626821942                            | N                                            | 0                                      | N                                   |
| ZC3H7B       | 0.626841334                            | N                                            | 0                                      | N                                   |
| PDC          | 0.627170268                            | N                                            | 107                                    | Y                                   |
| THAP2        | 0.627306244                            | N                                            | 0                                      | N                                   |
| CSNK2A2      | 0.627390111                            | N                                            | 1                                      | N                                   |
| JCAD         | 0.627390111                            | N                                            | 0                                      | N                                   |
| UQCRB        | 0.627390111                            | N                                            | 2                                      | N                                   |
| ACBD5        | 0.627399656                            | N                                            | 0                                      | N                                   |
| GLIS3        | 0.627399656                            | N                                            | 59                                     | N                                   |
| GRIA3        | 0.627399656                            | N                                            | 5                                      | N                                   |
| AL449403.1   | 0.627466093                            | N                                            | 0                                      | N                                   |
| RPS6KL1      | 0.627466093                            | N                                            | 0                                      | N                                   |
| FLVCR1       | 0.627510758                            | N                                            | 1                                      | N                                   |
| OVCH1        | 0.627510758                            | N                                            | 0                                      | N                                   |
| AC022149.1   | 0.627598972                            | N                                            | 0                                      | N                                   |
| FAM209A      | 0.627598972                            | N                                            | 0                                      | N                                   |
| PYCR1        | 0.62768343                             | N                                            | 1                                      | N                                   |
| PPP1R36      | 0.627872539                            | N                                            | 0                                      | N                                   |
| SQLE         | 0.62789898                             | N                                            | 5                                      | N                                   |
| ADSS         | 0.628093908                            | N                                            | 2                                      | N                                   |
| ANKRD10-IT1  | 0.628095578                            | N                                            | 0                                      | N                                   |
| PPP1R13B     | 0.628171272                            | N                                            | 0                                      | N                                   |
| MICU3        | 0.628359049                            | N                                            | 0                                      | N                                   |
| USP47        | 0.628481534                            | N                                            | 0                                      | N                                   |
| AP001207.2   | 0.628497624                            | N                                            | 0                                      | N                                   |
| FYCO1        | 0.628497624                            | N                                            | 0                                      | N                                   |
| SNAPC4       | 0.628497624                            | N                                            | 0                                      | N                                   |

| Gene symbols | FDR (differential expression analysis) | Differentially expressed gene? Y, Yes; N, No | Number of insulin related publications | Insulin related gene? Y, Yes; N, No |
|--------------|----------------------------------------|----------------------------------------------|----------------------------------------|-------------------------------------|
| CRBN         | 0.628617573                            | N                                            | 4                                      | N                                   |
| LINC00923    | 0.628617573                            | N                                            | 0                                      | N                                   |
| MISP3        | 0.628617573                            | N                                            | 0                                      | N                                   |
| NCK1         | 0.628617573                            | N                                            | 7                                      | N                                   |
| AC116917.1   | 0.629103263                            | N                                            | 0                                      | N                                   |
| CS           | 0.629103263                            | N                                            | 1000                                   | Y                                   |
| GAPDHP60     | 0.629103263                            | N                                            | 0                                      | N                                   |
| LAPTM4BP2    | 0.629103263                            | N                                            | 0                                      | N                                   |
| RRS1         | 0.629103263                            | N                                            | 0                                      | N                                   |
| SNAPC5       | 0.629103263                            | N                                            | 0                                      | N                                   |
| FAM167B      | 0.629131252                            | N                                            | 0                                      | N                                   |
| DMBT1        | 0.629160943                            | N                                            | 2                                      | N                                   |
| NUP98        | 0.629160943                            | N                                            | 1                                      | N                                   |
| POTEC        | 0.629160943                            | N                                            | 0                                      | N                                   |
| TSHZ2        | 0.629160943                            | N                                            | 0                                      | N                                   |
| AC009831.1   | 0.629174981                            | N                                            | 0                                      | N                                   |
| AFTPH        | 0.629174981                            | N                                            | 0                                      | N                                   |
| AP001429.1   | 0.629174981                            | N                                            | 0                                      | N                                   |
| ASPRV1       | 0.629174981                            | N                                            | 0                                      | N                                   |
| B4GALT5      | 0.629174981                            | N                                            | 3                                      | N                                   |
| C1QTNF3      | 0.629174981                            | N                                            | 22                                     | N                                   |
| CAPN7        | 0.629174981                            | N                                            | 0                                      | N                                   |
| CDH6         | 0.629174981                            | N                                            | 2                                      | N                                   |
| CFLIP2       | 0.629174981                            | N                                            | 0                                      | N                                   |
| FBXO28       | 0.629174981                            | N                                            | 1                                      | N                                   |
| FRZB         | 0.629174981                            | N                                            | 3                                      | N                                   |
| GPC3         | 0.629174981                            | N                                            | 39                                     | N                                   |
| IK           | 0.629174981                            | N                                            | 30                                     | N                                   |
| JHDM1D-AS1   | 0.629174981                            | N                                            | 0                                      | N                                   |
| KLB          | 0.629174981                            | N                                            | 43                                     | N                                   |
| LINC01128    | 0.629174981                            | N                                            | 0                                      | N                                   |
| NEO1         | 0.629174981                            | N                                            | 0                                      | N                                   |
| SGK2         | 0.629174981                            | N                                            | 10                                     | N                                   |
| SMG1P5       | 0.629174981                            | N                                            | 0                                      | N                                   |
| SRSF10       | 0.629174981                            | N                                            | 1                                      | N                                   |
| TGFA         | 0.629174981                            | N                                            | 14                                     | N                                   |
| TSG101       | 0.629174981                            | N                                            | 5                                      | N                                   |
| TTY14        | 0.629174981                            | N                                            | 0                                      | N                                   |
| UBE2W        | 0.629174981                            | N                                            | 0                                      | N                                   |
| UCHL5        | 0.629174981                            | N                                            | 1                                      | N                                   |
| ADAMTS20     | 0.629191797                            | N                                            | 1                                      | N                                   |
| AL138878.2   | 0.629191797                            | N                                            | 0                                      | N                                   |
| CCT7P1       | 0.629191797                            | N                                            | 0                                      | N                                   |
| KRTCAP2      | 0.629191797                            | N                                            | 0                                      | N                                   |
| AC093010.3   | 0.629383299                            | N                                            | 0                                      | N                                   |
| ACTL10       | 0.629383299                            | N                                            | 0                                      | N                                   |
| JADE3        | 0.629383299                            | N                                            | 0                                      | N                                   |
| SMIM15       | 0.629383299                            | N                                            | 0                                      | N                                   |
| GMPS         | 0.629626577                            | N                                            | 1                                      | N                                   |
| PHAX         | 0.629626577                            | N                                            | 0                                      | N                                   |
| NDUFA6       | 0.629879252                            | N                                            | 2                                      | N                                   |
| AL592437.1   | 0.630076914                            | N                                            | 0                                      | N                                   |
| DHRS11       | 0.630076914                            | N                                            | 0                                      | N                                   |
| MYH10        | 0.630162547                            | N                                            | 2                                      | N                                   |
| AL353795.3   | 0.630282574                            | N                                            | 0                                      | N                                   |
| KCNJ9        | 0.630319216                            | N                                            | 1                                      | N                                   |
| AL445305.1   | 0.63032727                             | N                                            | 0                                      | N                                   |
| ASAP3        | 0.63032727                             | N                                            | 0                                      | N                                   |
| CXorf40A     | 0.63032727                             | N                                            | 0                                      | N                                   |
| DAW1         | 0.63032727                             | N                                            | 0                                      | N                                   |
| SETX         | 0.63032727                             | N                                            | 3                                      | N                                   |
| ACAP2        | 0.630373938                            | N                                            | 0                                      | N                                   |
| AL021707.8   | 0.630373938                            | N                                            | 0                                      | N                                   |
| AL512844.1   | 0.630373938                            | N                                            | 0                                      | N                                   |
| GART         | 0.630373938                            | N                                            | 1                                      | N                                   |
| LINC00472    | 0.630373938                            | N                                            | 0                                      | N                                   |

| Gene symbols | FDR (differential expression analysis) | Differentially expressed gene? Y, Yes; N, No | Number of insulin related publications | Insulin related gene? Y, Yes; N, No |
|--------------|----------------------------------------|----------------------------------------------|----------------------------------------|-------------------------------------|
| PDPR         | 0.630373938                            | N                                            | 1                                      | N                                   |
| PSMD10       | 0.630373938                            | N                                            | 1                                      | N                                   |
| ATP2C2       | 0.630478189                            | N                                            | 0                                      | N                                   |
| CDX2         | 0.630478189                            | N                                            | 43                                     | N                                   |
| FAM114A1     | 0.630478189                            | N                                            | 0                                      | N                                   |
| GFPT1        | 0.630478189                            | N                                            | 10                                     | N                                   |
| NCEH1        | 0.630478189                            | N                                            | 3                                      | N                                   |
| SHKBP1       | 0.630478189                            | N                                            | 0                                      | N                                   |
| GOLGA8B      | 0.630974268                            | N                                            | 0                                      | N                                   |
| TCF3P1       | 0.630974268                            | N                                            | 0                                      | N                                   |
| LXN          | 0.631045687                            | N                                            | 0                                      | N                                   |
| C1RL         | 0.631122063                            | N                                            | 0                                      | N                                   |
| LINC01840    | 0.631122063                            | N                                            | 0                                      | N                                   |
| SALL3        | 0.631122063                            | N                                            | 0                                      | N                                   |
| TMEM101      | 0.631122063                            | N                                            | 0                                      | N                                   |
| SKIV2L2      | 0.631248982                            | N                                            | 0                                      | N                                   |
| CCNL1        | 0.631388009                            | N                                            | 6                                      | N                                   |
| CCNYL2       | 0.631395228                            | N                                            | 0                                      | N                                   |
| AC126118.1   | 0.631490919                            | N                                            | 0                                      | N                                   |
| C14orf79     | 0.631768033                            | N                                            | 0                                      | N                                   |
| CDC42SE2     | 0.631768033                            | N                                            | 0                                      | N                                   |
| DVL1         | 0.631768033                            | N                                            | 3                                      | N                                   |
| JADE1        | 0.631768033                            | N                                            | 0                                      | N                                   |
| PRMT2        | 0.631768033                            | N                                            | 0                                      | N                                   |
| TSR3         | 0.631768033                            | N                                            | 0                                      | N                                   |
| ADPRHL1      | 0.631834389                            | N                                            | 0                                      | N                                   |
| AL390195.1   | 0.631834389                            | N                                            | 0                                      | N                                   |
| AL513175.1   | 0.631834389                            | N                                            | 0                                      | N                                   |
| FUT1         | 0.631834389                            | N                                            | 0                                      | N                                   |
| KCNJ15       | 0.631834389                            | N                                            | 4                                      | N                                   |
| AC090241.1   | 0.631867006                            | N                                            | 0                                      | N                                   |
| ADPRHL2      | 0.631867006                            | N                                            | 0                                      | N                                   |
| C19orf66     | 0.631867006                            | N                                            | 0                                      | N                                   |
| GCHFR        | 0.631867006                            | N                                            | 0                                      | N                                   |
| LMOD1        | 0.631867006                            | N                                            | 0                                      | N                                   |
| MED14        | 0.631867006                            | N                                            | 1                                      | N                                   |
| PRSS2        | 0.631867006                            | N                                            | 2                                      | N                                   |
| SMPD1        | 0.631867006                            | N                                            | 65                                     | N                                   |
| SNAPIN       | 0.631867006                            | N                                            | 8                                      | N                                   |
| MPV17        | 0.63192201                             | N                                            | 1                                      | N                                   |
| CELSR1       | 0.631965054                            | N                                            | 0                                      | N                                   |
| NLRP1        | 0.631965054                            | N                                            | 1                                      | N                                   |
| SP110        | 0.631965054                            | N                                            | 0                                      | N                                   |
| API5P2       | 0.632012793                            | N                                            | 0                                      | N                                   |
| LRRC6        | 0.632035112                            | N                                            | 0                                      | N                                   |
| UQCRFS1P1    | 0.632035112                            | N                                            | 0                                      | N                                   |
| AC005943.1   | 0.632443851                            | N                                            | 0                                      | N                                   |
| AC006252.1   | 0.632443851                            | N                                            | 0                                      | N                                   |
| AC090340.1   | 0.632443851                            | N                                            | 0                                      | N                                   |
| AL162393.1   | 0.632443851                            | N                                            | 0                                      | N                                   |
| AL512625.3   | 0.632443851                            | N                                            | 0                                      | N                                   |
| ATP5J2       | 0.632443851                            | N                                            | 0                                      | N                                   |
| C19orf57     | 0.632443851                            | N                                            | 0                                      | N                                   |
| CCDC124      | 0.632443851                            | N                                            | 0                                      | N                                   |
| CXorf36      | 0.632443851                            | N                                            | 0                                      | N                                   |
| DDIT4        | 0.632443851                            | N                                            | 29                                     | N                                   |
| HACE1        | 0.632443851                            | N                                            | 1                                      | N                                   |
| HNRNPDL      | 0.632443851                            | N                                            | 0                                      | N                                   |
| LIME1        | 0.632443851                            | N                                            | 0                                      | N                                   |
| MCM10        | 0.632443851                            | N                                            | 0                                      | N                                   |
| NCOA4P3      | 0.632443851                            | N                                            | 0                                      | N                                   |
| NPAS4        | 0.632443851                            | N                                            | 7                                      | N                                   |
| SIN3B        | 0.632443851                            | N                                            | 0                                      | N                                   |
| SMIM14       | 0.632443851                            | N                                            | 1                                      | N                                   |
| SNTA1        | 0.632443851                            | N                                            | 0                                      | N                                   |
| TMEM200C     | 0.632443851                            | N                                            | 0                                      | N                                   |

| Gene symbols | FDR (differential expression analysis) | Differentially expressed gene? Y, Yes; N, No | Number of insulin related publications | Insulin related gene? Y, Yes; N, No |
|--------------|----------------------------------------|----------------------------------------------|----------------------------------------|-------------------------------------|
| ZNF626       | 0.632443851                            | N                                            | 0                                      | N                                   |
| C2CD3        | 0.632501083                            | N                                            | 0                                      | N                                   |
| GTPBP2       | 0.632503898                            | N                                            | 0                                      | N                                   |
| EIF4E        | 0.632533527                            | N                                            | 389                                    | Y                                   |
| SIPA1L2      | 0.632624577                            | N                                            | 0                                      | N                                   |
| AP001372.2   | 0.632733736                            | N                                            | 0                                      | N                                   |
| PTGER3       | 0.632733736                            | N                                            | 10                                     | N                                   |
| PYHIN1       | 0.632733736                            | N                                            | 0                                      | N                                   |
| RCC2P6       | 0.632733736                            | N                                            | 0                                      | N                                   |
| SLIRP        | 0.632733736                            | N                                            | 0                                      | N                                   |
| SPG11        | 0.63275693                             | N                                            | 0                                      | N                                   |
| TAS2R5       | 0.63275693                             | N                                            | 0                                      | N                                   |
| BRMS1        | 0.632950308                            | N                                            | 1                                      | N                                   |
| AC087721.1   | 0.633212781                            | N                                            | 0                                      | N                                   |
| CHSY3        | 0.633212781                            | N                                            | 0                                      | N                                   |
| HS3ST5       | 0.633212781                            | N                                            | 0                                      | N                                   |
| LINGO1       | 0.633212781                            | N                                            | 0                                      | N                                   |
| STARD7-AS1   | 0.633212781                            | N                                            | 0                                      | N                                   |
| AC004854.2   | 0.633311529                            | N                                            | 0                                      | N                                   |
| VAMP4        | 0.633311529                            | N                                            | 9                                      | N                                   |
| CCDC190      | 0.633818059                            | N                                            | 0                                      | N                                   |
| UBQLN4P1     | 0.633911763                            | N                                            | 0                                      | N                                   |
| ALDH4A1      | 0.633923567                            | N                                            | 1                                      | N                                   |
| APOL6        | 0.634005132                            | N                                            | 0                                      | N                                   |
| SAMD4B       | 0.634005132                            | N                                            | 0                                      | N                                   |
| ACTG2        | 0.634109606                            | N                                            | 3                                      | N                                   |
| PIKFYVE      | 0.634109606                            | N                                            | 23                                     | N                                   |
| TXNL4A       | 0.634109606                            | N                                            | 1                                      | N                                   |
| BAX          | 0.634241488                            | N                                            | 902                                    | Y                                   |
| COX5AP2      | 0.634241488                            | N                                            | 0                                      | N                                   |
| LINC02367    | 0.634241488                            | N                                            | 0                                      | N                                   |
| MTSS1L       | 0.634241488                            | N                                            | 0                                      | N                                   |
| PAPSS2       | 0.634241488                            | N                                            | 2                                      | N                                   |
| POLDIP3      | 0.634241488                            | N                                            | 2                                      | N                                   |
| PP7080       | 0.634288797                            | N                                            | 0                                      | N                                   |
| DGKH         | 0.634490126                            | N                                            | 1                                      | N                                   |
| VPS39        | 0.634719339                            | N                                            | 0                                      | N                                   |
| UQCR10       | 0.635032931                            | N                                            | 1                                      | N                                   |
| BOLA1        | 0.635080652                            | N                                            | 0                                      | N                                   |
| AC010627.1   | 0.63518231                             | N                                            | 0                                      | N                                   |
| NFU1         | 0.635219445                            | N                                            | 0                                      | N                                   |
| OR5P3        | 0.635219445                            | N                                            | 0                                      | N                                   |
| TSTD1        | 0.635219445                            | N                                            | 0                                      | N                                   |
| SLC38A5      | 0.635226509                            | N                                            | 1                                      | N                                   |
| AC053481.2   | 0.635245541                            | N                                            | 0                                      | N                                   |
| COMMD6       | 0.635245541                            | N                                            | 1                                      | N                                   |
| FUS          | 0.635245541                            | N                                            | 16                                     | N                                   |
| LINC02302    | 0.635245541                            | N                                            | 0                                      | N                                   |
| PWP1         | 0.635245541                            | N                                            | 0                                      | N                                   |
| STX11        | 0.635245541                            | N                                            | 1                                      | N                                   |
| YME1L1       | 0.635245541                            | N                                            | 0                                      | N                                   |
| ZIK1         | 0.635245541                            | N                                            | 1                                      | N                                   |
| DHRS3        | 0.635388526                            | N                                            | 0                                      | N                                   |
| A4GALT       | 0.635399683                            | N                                            | 0                                      | N                                   |
| ABCB9        | 0.635399683                            | N                                            | 1                                      | N                                   |
| AC005381.1   | 0.635399683                            | N                                            | 0                                      | N                                   |
| AC015712.1   | 0.635399683                            | N                                            | 0                                      | N                                   |
| ATPAF2       | 0.635399683                            | N                                            | 0                                      | N                                   |
| GOT1         | 0.635399683                            | N                                            | 4                                      | N                                   |
| HDAC5        | 0.635399683                            | N                                            | 29                                     | N                                   |
| LRRIQ1       | 0.635399683                            | N                                            | 0                                      | N                                   |
| LTA4H        | 0.635399683                            | N                                            | 2                                      | N                                   |
| OSTM1        | 0.635399683                            | N                                            | 1                                      | N                                   |
| PDS5B        | 0.635399683                            | N                                            | 0                                      | N                                   |
| TRIM45       | 0.635399683                            | N                                            | 0                                      | N                                   |
| WWTR1        | 0.635399683                            | N                                            | 7                                      | N                                   |



| Gene symbols | FDR (differential expression analysis) | Differentially expressed gene? Y, Yes; N, No | Number of insulin related publications | Insulin related gene? Y, Yes; N, No |
|--------------|----------------------------------------|----------------------------------------------|----------------------------------------|-------------------------------------|
| PI4KAP1      | 0.635440955                            | N                                            | 0                                      | N                                   |
| AC004917.1   | 0.635618352                            | N                                            | 0                                      | N                                   |
| KIAA1841     | 0.635618352                            | N                                            | 0                                      | N                                   |
| AP001347.1   | 0.635709494                            | N                                            | 0                                      | N                                   |
| FAT3         | 0.635861422                            | N                                            | 0                                      | N                                   |
| POLD4        | 0.635861422                            | N                                            | 1                                      | N                                   |
| TANGO2       | 0.635861422                            | N                                            | 0                                      | N                                   |
| AC078785.1   | 0.636082108                            | N                                            | 0                                      | N                                   |
| MRPL42       | 0.636327342                            | N                                            | 0                                      | N                                   |
| AL139300.1   | 0.63649804                             | N                                            | 0                                      | N                                   |
| AP001062.1   | 0.636675995                            | N                                            | 0                                      | N                                   |
| WTAP         | 0.636716161                            | N                                            | 2                                      | N                                   |
| FBXL3        | 0.636763237                            | N                                            | 1                                      | N                                   |
| XPR1         | 0.636916213                            | N                                            | 1                                      | N                                   |
| TMEM163      | 0.636971233                            | N                                            | 3                                      | N                                   |
| LRP8         | 0.637020278                            | N                                            | 2                                      | N                                   |
| MRPL23       | 0.637020278                            | N                                            | 4                                      | N                                   |
| PHF8         | 0.637020278                            | N                                            | 1                                      | N                                   |
| ZNF397       | 0.637020278                            | N                                            | 0                                      | N                                   |
| AC112907.3   | 0.637085024                            | N                                            | 0                                      | N                                   |
| ANKRD9       | 0.637085024                            | N                                            | 0                                      | N                                   |
| CYB5R3       | 0.637085024                            | N                                            | 0                                      | N                                   |
| ERCC6        | 0.637085024                            | N                                            | 6                                      | N                                   |
| GATM         | 0.637085024                            | N                                            | 2                                      | N                                   |
| GPX7         | 0.637085024                            | N                                            | 5                                      | N                                   |
| KIF3B        | 0.637085024                            | N                                            | 1                                      | N                                   |
| LINC01881    | 0.637085024                            | N                                            | 0                                      | N                                   |
| MIS12        | 0.637085024                            | N                                            | 0                                      | N                                   |
| RAPGEF3      | 0.637085024                            | N                                            | 29                                     | N                                   |
| RNF212       | 0.637085024                            | N                                            | 0                                      | N                                   |
| SLC35E4      | 0.637085024                            | N                                            | 0                                      | N                                   |
| TPH1         | 0.637085024                            | N                                            | 30                                     | N                                   |
| CDC40        | 0.637125106                            | N                                            | 0                                      | N                                   |
| FAM160A1     | 0.637125106                            | N                                            | 0                                      | N                                   |
| MTTP         | 0.637125106                            | N                                            | 46                                     | N                                   |
| SSBP4        | 0.637125106                            | N                                            | 0                                      | N                                   |
| CYS1         | 0.637187792                            | N                                            | 3                                      | N                                   |
| RGS7BP       | 0.63723304                             | N                                            | 0                                      | N                                   |
| AL161431.1   | 0.637395127                            | N                                            | 0                                      | N                                   |
| AC007383.2   | 0.637472948                            | N                                            | 0                                      | N                                   |
| CLTA         | 0.637472948                            | N                                            | 0                                      | N                                   |
| HLX-AS1      | 0.637472948                            | N                                            | 0                                      | N                                   |
| HMOX2        | 0.637472948                            | N                                            | 0                                      | N                                   |
| NOM1         | 0.637472948                            | N                                            | 2                                      | N                                   |
| LINC01560    | 0.637528821                            | N                                            | 0                                      | N                                   |
| ABHD12B      | 0.637582703                            | N                                            | 0                                      | N                                   |
| AC008752.3   | 0.637582703                            | N                                            | 0                                      | N                                   |
| AL022069.1   | 0.637582703                            | N                                            | 0                                      | N                                   |
| AL133355.1   | 0.637582703                            | N                                            | 0                                      | N                                   |
| AP002840.2   | 0.637582703                            | N                                            | 0                                      | N                                   |
| CARS         | 0.637582703                            | N                                            | 57                                     | N                                   |
| GBA2         | 0.637582703                            | N                                            | 0                                      | N                                   |
| MECP2        | 0.637582703                            | N                                            | 49                                     | N                                   |
| SETD1A       | 0.637582703                            | N                                            | 0                                      | N                                   |
| RAB39B       | 0.637667997                            | N                                            | 0                                      | N                                   |
| DNAAF3       | 0.637691354                            | N                                            | 0                                      | N                                   |
| RTN4R        | 0.637691354                            | N                                            | 0                                      | N                                   |
| TMEM78       | 0.637779099                            | N                                            | 0                                      | N                                   |
| DDX55        | 0.637891822                            | N                                            | 0                                      | N                                   |
| AL109618.1   | 0.638114894                            | N                                            | 0                                      | N                                   |
| IGSF5        | 0.638114894                            | N                                            | 0                                      | N                                   |
| DMAC2        | 0.638185517                            | N                                            | 0                                      | N                                   |
| ACOX3        | 0.638218989                            | N                                            | 2                                      | N                                   |
| LINC01554    | 0.638218989                            | N                                            | 0                                      | N                                   |
| PSEN2        | 0.638218989                            | N                                            | 9                                      | N                                   |
| RUFY1        | 0.638218989                            | N                                            | 0                                      | N                                   |

| Gene symbols | FDR (differential expression analysis) | Differentially expressed gene? Y, Yes; N, No | Number of insulin related publications | Insulin related gene? Y, Yes; N, No |
|--------------|----------------------------------------|----------------------------------------------|----------------------------------------|-------------------------------------|
| ZNF563       | 0.638218989                            | N                                            | 0                                      | N                                   |
| ZNF638       | 0.638218989                            | N                                            | 0                                      | N                                   |
| ABCC5        | 0.638374762                            | N                                            | 3                                      | N                                   |
| AL390860.1   | 0.638374762                            | N                                            | 0                                      | N                                   |
| C10orf55     | 0.638374762                            | N                                            | 0                                      | N                                   |
| CHMP1A       | 0.638374762                            | N                                            | 1                                      | N                                   |
| TBCA         | 0.638374762                            | N                                            | 1                                      | N                                   |
| CDC16        | 0.638381956                            | N                                            | 18                                     | N                                   |
| SMNDC1       | 0.638482474                            | N                                            | 1                                      | N                                   |
| SMARCE1P1    | 0.638595188                            | N                                            | 0                                      | N                                   |
| ADAMTS7      | 0.638598312                            | N                                            | 0                                      | N                                   |
| SIRPAP1      | 0.638598312                            | N                                            | 0                                      | N                                   |
| AC145207.5   | 0.638632945                            | N                                            | 0                                      | N                                   |
| FGD5-AS1     | 0.638632945                            | N                                            | 0                                      | N                                   |
| AC068888.1   | 0.638968108                            | N                                            | 0                                      | N                                   |
| AC233279.1   | 0.638968939                            | N                                            | 0                                      | N                                   |
| AL355574.1   | 0.639111995                            | N                                            | 0                                      | N                                   |
| SPCS2P4      | 0.639111995                            | N                                            | 0                                      | N                                   |
| AC010148.1   | 0.639116462                            | N                                            | 0                                      | N                                   |
| MEGF9        | 0.639116462                            | N                                            | 0                                      | N                                   |
| CMKLR1       | 0.639213074                            | N                                            | 32                                     | N                                   |
| PTGER1       | 0.639371468                            | N                                            | 4                                      | N                                   |
| C20orf96     | 0.63943614                             | N                                            | 0                                      | N                                   |
| CEP57        | 0.639538673                            | N                                            | 1                                      | N                                   |
| TRBC2        | 0.63954304                             | N                                            | 0                                      | N                                   |
| AL590705.5   | 0.639554806                            | N                                            | 0                                      | N                                   |
| JOSD1        | 0.639554806                            | N                                            | 0                                      | N                                   |
| YARS2        | 0.639554806                            | N                                            | 0                                      | N                                   |
| ABCA9        | 0.639566386                            | N                                            | 0                                      | N                                   |
| TBP          | 0.639737261                            | N                                            | 37                                     | N                                   |
| TIMM8A       | 0.639737261                            | N                                            | 0                                      | N                                   |
| AF131215.4   | 0.639825345                            | N                                            | 0                                      | N                                   |
| ARID2        | 0.639864907                            | N                                            | 0                                      | N                                   |
| C11orf57     | 0.640005888                            | N                                            | 0                                      | N                                   |
| IER5         | 0.640005888                            | N                                            | 1                                      | N                                   |
| RPL17P50     | 0.640005888                            | N                                            | 0                                      | N                                   |
| SUGP1        | 0.640005888                            | N                                            | 0                                      | N                                   |
| VBP1         | 0.640005888                            | N                                            | 0                                      | N                                   |
| ADNP2        | 0.640030187                            | N                                            | 0                                      | N                                   |
| SLITRK1      | 0.640030187                            | N                                            | 0                                      | N                                   |
| PLEKHG4B     | 0.640043631                            | N                                            | 0                                      | N                                   |
| AC010336.1   | 0.640213869                            | N                                            | 0                                      | N                                   |
| AC025539.1   | 0.64022893                             | N                                            | 0                                      | N                                   |
| MRPS30       | 0.640267192                            | N                                            | 1                                      | N                                   |
| TG           | 0.640376227                            | N                                            | 1000                                   | Y                                   |
| AL590438.1   | 0.640429773                            | N                                            | 0                                      | N                                   |
| SLC25A3      | 0.640429773                            | N                                            | 1                                      | N                                   |
| UBR1         | 0.640429773                            | N                                            | 1                                      | N                                   |
| CHRNB4       | 0.640639079                            | N                                            | 1                                      | N                                   |
| EIF4H        | 0.640721847                            | N                                            | 0                                      | N                                   |
| SNW1         | 0.640721847                            | N                                            | 0                                      | N                                   |
| AL034548.1   | 0.640779291                            | N                                            | 0                                      | N                                   |
| ARHGDI1A     | 0.640907869                            | N                                            | 3                                      | N                                   |
| TSTD2        | 0.640907869                            | N                                            | 0                                      | N                                   |
| SPOCK1       | 0.641658069                            | N                                            | 1                                      | N                                   |
| AC132008.2   | 0.641699967                            | N                                            | 0                                      | N                                   |
| AL356292.1   | 0.641699967                            | N                                            | 0                                      | N                                   |
| AL356317.1   | 0.641699967                            | N                                            | 0                                      | N                                   |
| AL359921.1   | 0.641699967                            | N                                            | 0                                      | N                                   |
| COPS8P2      | 0.641699967                            | N                                            | 0                                      | N                                   |
| NCOA6        | 0.641699967                            | N                                            | 8                                      | N                                   |
| SAP30L-AS1   | 0.641699967                            | N                                            | 0                                      | N                                   |
| SMURF2       | 0.641699967                            | N                                            | 2                                      | N                                   |
| WNT7B        | 0.641699967                            | N                                            | 2                                      | N                                   |
| NME5         | 0.641753718                            | N                                            | 0                                      | N                                   |
| MRPS34       | 0.641764628                            | N                                            | 0                                      | N                                   |

| Gene symbols | FDR (differential expression analysis) | Differentially expressed gene? Y, Yes; N, No | Number of insulin related publications | Insulin related gene? Y, Yes; N, No |
|--------------|----------------------------------------|----------------------------------------------|----------------------------------------|-------------------------------------|
| AC253576.1   | 0.641842532                            | N                                            | 0                                      | N                                   |
| ATP2C1       | 0.641842532                            | N                                            | 3                                      | N                                   |
| ATP1B1       | 0.6419273                              | N                                            | 1                                      | N                                   |
| UBL7         | 0.641935563                            | N                                            | 0                                      | N                                   |
| NAF1         | 0.642298534                            | N                                            | 0                                      | N                                   |
| PIN4P1       | 0.642298534                            | N                                            | 0                                      | N                                   |
| RN7SKP9      | 0.642298534                            | N                                            | 0                                      | N                                   |
| AC079594.2   | 0.642333043                            | N                                            | 0                                      | N                                   |
| NAA35        | 0.642543049                            | N                                            | 0                                      | N                                   |
| ANXA3        | 0.642777433                            | N                                            | 0                                      | N                                   |
| CAPN10       | 0.642777433                            | N                                            | 71                                     | N                                   |
| SRPX2        | 0.642777433                            | N                                            | 0                                      | N                                   |
| CEBPG        | 0.642876538                            | N                                            | 0                                      | N                                   |
| TAP2         | 0.642952108                            | N                                            | 23                                     | N                                   |
| AC004039.1   | 0.643018833                            | N                                            | 0                                      | N                                   |
| MOK          | 0.643163781                            | N                                            | 65                                     | N                                   |
| SAP18        | 0.643163781                            | N                                            | 0                                      | N                                   |
| SNX13        | 0.643190271                            | N                                            | 0                                      | N                                   |
| NEURL4       | 0.643225584                            | N                                            | 0                                      | N                                   |
| P3H1         | 0.643267356                            | N                                            | 0                                      | N                                   |
| AC107027.3   | 0.643418344                            | N                                            | 0                                      | N                                   |
| GOLGA2P11    | 0.643418344                            | N                                            | 0                                      | N                                   |
| EVPL         | 0.643438678                            | N                                            | 0                                      | N                                   |
| AOAH         | 0.643474964                            | N                                            | 0                                      | N                                   |
| HIPK4        | 0.64360541                             | N                                            | 0                                      | N                                   |
| PSG2         | 0.643634426                            | N                                            | 0                                      | N                                   |
| AC120114.5   | 0.643844735                            | N                                            | 0                                      | N                                   |
| ARMCX4       | 0.643844735                            | N                                            | 0                                      | N                                   |
| SDAD1P2      | 0.643844735                            | N                                            | 0                                      | N                                   |
| C17orf100    | 0.643847112                            | N                                            | 0                                      | N                                   |
| ISOC1        | 0.643847112                            | N                                            | 0                                      | N                                   |
| ST3GAL1      | 0.644148207                            | N                                            | 0                                      | N                                   |
| AC083964.1   | 0.644185997                            | N                                            | 0                                      | N                                   |
| MAGOH        | 0.644310503                            | N                                            | 0                                      | N                                   |
| AL031847.1   | 0.644358091                            | N                                            | 0                                      | N                                   |
| AC121493.1   | 0.644430371                            | N                                            | 0                                      | N                                   |
| P2RY2        | 0.644618665                            | N                                            | 6                                      | N                                   |
| Z97200.1     | 0.644618665                            | N                                            | 0                                      | N                                   |
| AC097374.2   | 0.644985499                            | N                                            | 0                                      | N                                   |
| ADSL         | 0.644985499                            | N                                            | 1                                      | N                                   |
| AMIGO3       | 0.644985499                            | N                                            | 0                                      | N                                   |
| B3GALNT2     | 0.644985499                            | N                                            | 0                                      | N                                   |
| DHODH        | 0.644985499                            | N                                            | 0                                      | N                                   |
| EHMT1        | 0.644985499                            | N                                            | 3                                      | N                                   |
| EPHA7        | 0.644985499                            | N                                            | 2                                      | N                                   |
| KLHL25       | 0.644985499                            | N                                            | 0                                      | N                                   |
| MAMDC2-AS1   | 0.644985499                            | N                                            | 0                                      | N                                   |
| RBM28        | 0.644985499                            | N                                            | 0                                      | N                                   |
| RP4-614O4.12 | 0.644985499                            | N                                            | 0                                      | N                                   |
| SOCS2        | 0.644985499                            | N                                            | 106                                    | Y                                   |
| STYX         | 0.644985499                            | N                                            | 0                                      | N                                   |
| TUSC3        | 0.644985499                            | N                                            | 2                                      | N                                   |
| UBAP2        | 0.644985499                            | N                                            | 0                                      | N                                   |
| UFSP1        | 0.644985499                            | N                                            | 1                                      | N                                   |
| PSD4         | 0.645037229                            | N                                            | 0                                      | N                                   |
| AC005077.4   | 0.645142669                            | N                                            | 0                                      | N                                   |
| AC022336.3   | 0.645142669                            | N                                            | 0                                      | N                                   |
| GFER         | 0.645142669                            | N                                            | 2                                      | N                                   |
| HDHD3        | 0.645142669                            | N                                            | 0                                      | N                                   |
| OAZ2         | 0.645142669                            | N                                            | 0                                      | N                                   |
| TAZ          | 0.645142669                            | N                                            | 33                                     | N                                   |
| VNN1         | 0.645142669                            | N                                            | 3                                      | N                                   |
| ANKRD30BP2   | 0.645238233                            | N                                            | 0                                      | N                                   |
| MIR31HG      | 0.645238233                            | N                                            | 0                                      | N                                   |
| BRWD1P2      | 0.645345747                            | N                                            | 0                                      | N                                   |
| RN7SL5P      | 0.645345747                            | N                                            | 0                                      | N                                   |

| Gene symbols | FDR (differential expression analysis) | Differentially expressed gene? Y, Yes; N, No | Number of insulin related publications | Insulin related gene? Y, Yes; N, No |
|--------------|----------------------------------------|----------------------------------------------|----------------------------------------|-------------------------------------|
| SLC30A5      | 0.645345747                            | N                                            | 4                                      | N                                   |
| WBP1L        | 0.645345747                            | N                                            | 0                                      | N                                   |
| SDHAF4       | 0.645359587                            | N                                            | 0                                      | N                                   |
| AC027801.1   | 0.645379499                            | N                                            | 0                                      | N                                   |
| MOGS         | 0.645379499                            | N                                            | 0                                      | N                                   |
| ZFR2         | 0.645379499                            | N                                            | 0                                      | N                                   |
| ZP3          | 0.645379499                            | N                                            | 4                                      | N                                   |
| LIMS1        | 0.645516608                            | N                                            | 2                                      | N                                   |
| SEC24B-AS1   | 0.645516608                            | N                                            | 0                                      | N                                   |
| AC097468.3   | 0.645585806                            | N                                            | 0                                      | N                                   |
| BRD2         | 0.645585806                            | N                                            | 11                                     | N                                   |
| CRNDE        | 0.645585806                            | N                                            | 3                                      | N                                   |
| ERGIC3       | 0.645585806                            | N                                            | 0                                      | N                                   |
| MTND1P32     | 0.645585806                            | N                                            | 0                                      | N                                   |
| NHSL2        | 0.645585806                            | N                                            | 0                                      | N                                   |
| ZNF273       | 0.645585806                            | N                                            | 0                                      | N                                   |
| HADHAP2      | 0.645916393                            | N                                            | 0                                      | N                                   |
| ILF3         | 0.645916393                            | N                                            | 1                                      | N                                   |
| AL137782.1   | 0.646326555                            | N                                            | 0                                      | N                                   |
| DMTF1        | 0.646326555                            | N                                            | 0                                      | N                                   |
| LPIN3        | 0.646326555                            | N                                            | 0                                      | N                                   |
| RD3          | 0.646326555                            | N                                            | 1                                      | N                                   |
| RN7SKP258    | 0.646326555                            | N                                            | 0                                      | N                                   |
| Z97832.2     | 0.646326555                            | N                                            | 0                                      | N                                   |
| DAPP1        | 0.646432201                            | N                                            | 2                                      | N                                   |
| PSMG1        | 0.646432201                            | N                                            | 1                                      | N                                   |
| SON          | 0.646432201                            | N                                            | 439                                    | Y                                   |
| AC010487.2   | 0.64662777                             | N                                            | 0                                      | N                                   |
| C19orf81     | 0.64662777                             | N                                            | 0                                      | N                                   |
| CHIA         | 0.646700353                            | N                                            | 152                                    | Y                                   |
| MTND5P14     | 0.646700353                            | N                                            | 0                                      | N                                   |
| UBE2FP2      | 0.646871931                            | N                                            | 0                                      | N                                   |
| WTAPP1       | 0.646871931                            | N                                            | 0                                      | N                                   |
| AC090517.2   | 0.646907709                            | N                                            | 0                                      | N                                   |
| AC034229.4   | 0.64694817                             | N                                            | 0                                      | N                                   |
| ASB7         | 0.64694817                             | N                                            | 0                                      | N                                   |
| CATSPER3     | 0.64694817                             | N                                            | 0                                      | N                                   |
| CU633967.1   | 0.64694817                             | N                                            | 0                                      | N                                   |
| FOLR3        | 0.64694817                             | N                                            | 2                                      | N                                   |
| HIC2         | 0.64694817                             | N                                            | 0                                      | N                                   |
| IFI27        | 0.64694817                             | N                                            | 1                                      | N                                   |
| KCTD12       | 0.64694817                             | N                                            | 2                                      | N                                   |
| KIAA1211L    | 0.64694817                             | N                                            | 0                                      | N                                   |
| KMO          | 0.64694817                             | N                                            | 4                                      | N                                   |
| KRT32        | 0.64694817                             | N                                            | 0                                      | N                                   |
| LINC01197    | 0.64694817                             | N                                            | 0                                      | N                                   |
| PFDN4        | 0.64694817                             | N                                            | 1                                      | N                                   |
| PLEKHM1P1    | 0.64694817                             | N                                            | 0                                      | N                                   |
| RTCA-AS1     | 0.64694817                             | N                                            | 0                                      | N                                   |
| SERTAD4-AS1  | 0.64694817                             | N                                            | 0                                      | N                                   |
| SNX33        | 0.64694817                             | N                                            | 0                                      | N                                   |
| TCF4         | 0.64694817                             | N                                            | 256                                    | Y                                   |
| WWC2-AS2     | 0.64694817                             | N                                            | 0                                      | N                                   |
| XIRP2        | 0.64694817                             | N                                            | 2                                      | N                                   |
| Z84485.1     | 0.64694817                             | N                                            | 0                                      | N                                   |
| SRC          | 0.64698022                             | N                                            | 1000                                   | Y                                   |
| TMEM201      | 0.64698022                             | N                                            | 0                                      | N                                   |
| AC084018.2   | 0.647136047                            | N                                            | 0                                      | N                                   |
| PRKCI        | 0.647305717                            | N                                            | 1                                      | N                                   |
| AC091230.1   | 0.647339853                            | N                                            | 0                                      | N                                   |
| IL13RA2      | 0.647339853                            | N                                            | 2                                      | N                                   |
| AC002553.1   | 0.64741404                             | N                                            | 0                                      | N                                   |
| AC092171.3   | 0.64741404                             | N                                            | 0                                      | N                                   |
| AC092794.1   | 0.64741404                             | N                                            | 0                                      | N                                   |
| AL356968.2   | 0.64741404                             | N                                            | 0                                      | N                                   |
| CNP          | 0.64741404                             | N                                            | 69                                     | N                                   |

| Gene symbols | FDR (differential expression analysis) | Differentially expressed gene? Y, Yes; N, No | Number of insulin related publications | Insulin related gene? Y, Yes; N, No |
|--------------|----------------------------------------|----------------------------------------------|----------------------------------------|-------------------------------------|
| EGLN3        | 0.64741404                             | N                                            | 7                                      | N                                   |
| EI24P2       | 0.64741404                             | N                                            | 0                                      | N                                   |
| GNA15        | 0.64741404                             | N                                            | 0                                      | N                                   |
| ITGA4        | 0.64741404                             | N                                            | 2                                      | N                                   |
| KLF2         | 0.64741404                             | N                                            | 15                                     | N                                   |
| TFAP2A       | 0.64741404                             | N                                            | 66                                     | N                                   |
| AHCTF1       | 0.647421604                            | N                                            | 0                                      | N                                   |
| LDHBP1       | 0.647466531                            | N                                            | 0                                      | N                                   |
| MSTO1        | 0.647466531                            | N                                            | 0                                      | N                                   |
| AC079315.1   | 0.647707369                            | N                                            | 0                                      | N                                   |
| ADGRA2       | 0.647756445                            | N                                            | 0                                      | N                                   |
| AL136126.1   | 0.647756445                            | N                                            | 0                                      | N                                   |
| DNAJC28      | 0.647756445                            | N                                            | 1                                      | N                                   |
| THRIL        | 0.647824729                            | N                                            | 1                                      | N                                   |
| ITGAX        | 0.647901693                            | N                                            | 11                                     | N                                   |
| LSP1P3       | 0.648054513                            | N                                            | 0                                      | N                                   |
| AC020549.1   | 0.64819812                             | N                                            | 0                                      | N                                   |
| KRR1         | 0.64819812                             | N                                            | 2                                      | N                                   |
| WNT16        | 0.64819812                             | N                                            | 4                                      | N                                   |
| IGF2BP2-AS1  | 0.648216986                            | N                                            | 0                                      | N                                   |
| JDP2         | 0.648216986                            | N                                            | 0                                      | N                                   |
| PES1P2       | 0.648216986                            | N                                            | 0                                      | N                                   |
| SLC12A5      | 0.648216986                            | N                                            | 2                                      | N                                   |
| AC008434.1   | 0.648223438                            | N                                            | 0                                      | N                                   |
| AC103796.1   | 0.648223438                            | N                                            | 0                                      | N                                   |
| AKIP1        | 0.648223438                            | N                                            | 0                                      | N                                   |
| ERICH6-AS1   | 0.648223438                            | N                                            | 0                                      | N                                   |
| SLFN12L      | 0.648223438                            | N                                            | 0                                      | N                                   |
| TSPAN1       | 0.648223438                            | N                                            | 1                                      | N                                   |
| RBM8A        | 0.648482174                            | N                                            | 0                                      | N                                   |
| AC024075.2   | 0.648598878                            | N                                            | 0                                      | N                                   |
| AC136604.2   | 0.648598878                            | N                                            | 0                                      | N                                   |
| AC242426.4   | 0.648598878                            | N                                            | 0                                      | N                                   |
| AL078645.2   | 0.648598878                            | N                                            | 0                                      | N                                   |
| AL080317.1   | 0.648598878                            | N                                            | 0                                      | N                                   |
| AL136162.1   | 0.648598878                            | N                                            | 0                                      | N                                   |
| AL137127.1   | 0.648598878                            | N                                            | 0                                      | N                                   |
| ASB18        | 0.648598878                            | N                                            | 0                                      | N                                   |
| ATF4         | 0.648598878                            | N                                            | 159                                    | Y                                   |
| BHLHE40      | 0.648598878                            | N                                            | 18                                     | N                                   |
| CCDC18-AS1   | 0.648598878                            | N                                            | 0                                      | N                                   |
| CDH3         | 0.648598878                            | N                                            | 3                                      | N                                   |
| CMBL         | 0.648598878                            | N                                            | 13                                     | N                                   |
| HLA-L        | 0.648598878                            | N                                            | 0                                      | N                                   |
| HNRNPC       | 0.648598878                            | N                                            | 0                                      | N                                   |
| KDM4A        | 0.648598878                            | N                                            | 0                                      | N                                   |
| LRRC8C       | 0.648598878                            | N                                            | 0                                      | N                                   |
| METTL22      | 0.648598878                            | N                                            | 0                                      | N                                   |
| MTURN        | 0.648598878                            | N                                            | 0                                      | N                                   |
| PHF20L1      | 0.648598878                            | N                                            | 0                                      | N                                   |
| RNF25        | 0.648598878                            | N                                            | 0                                      | N                                   |
| RPS6P25      | 0.648598878                            | N                                            | 0                                      | N                                   |
| SMAP1        | 0.648598878                            | N                                            | 0                                      | N                                   |
| TTI1         | 0.648598878                            | N                                            | 1                                      | N                                   |
| ZNF76        | 0.648598878                            | N                                            | 0                                      | N                                   |
| PLPP5        | 0.648614393                            | N                                            | 0                                      | N                                   |
| AL512770.1   | 0.648704346                            | N                                            | 0                                      | N                                   |
| LRP12        | 0.648924697                            | N                                            | 1                                      | N                                   |
| AC011477.3   | 0.64899655                             | N                                            | 0                                      | N                                   |
| WNT11        | 0.64899655                             | N                                            | 7                                      | N                                   |
| ANKRD27      | 0.649129886                            | N                                            | 0                                      | N                                   |
| SPTLC2       | 0.649129886                            | N                                            | 5                                      | N                                   |
| AC092073.1   | 0.649187527                            | N                                            | 0                                      | N                                   |
| AL353678.1   | 0.649187527                            | N                                            | 0                                      | N                                   |
| AP005242.4   | 0.649187527                            | N                                            | 0                                      | N                                   |
| BX322639.1   | 0.649187527                            | N                                            | 0                                      | N                                   |

| Gene symbols | FDR (differential expression analysis) | Differentially expressed gene? Y, Yes; N, No | Number of insulin related publications | Insulin related gene? Y, Yes; N, No |
|--------------|----------------------------------------|----------------------------------------------|----------------------------------------|-------------------------------------|
| C1QBP        | 0.649187527                            | N                                            | 6                                      | N                                   |
| DES11        | 0.649187527                            | N                                            | 0                                      | N                                   |
| DGKA         | 0.649187527                            | N                                            | 2                                      | N                                   |
| MTCYBP32     | 0.649187527                            | N                                            | 0                                      | N                                   |
| RANBP10      | 0.649187527                            | N                                            | 0                                      | N                                   |
| SECTM1       | 0.649187527                            | N                                            | 0                                      | N                                   |
| THG1L        | 0.649187527                            | N                                            | 0                                      | N                                   |
| TNRC6B       | 0.649187527                            | N                                            | 1                                      | N                                   |
| AC007497.1   | 0.649196276                            | N                                            | 0                                      | N                                   |
| AL356273.3   | 0.649196276                            | N                                            | 0                                      | N                                   |
| LINC00689    | 0.649196276                            | N                                            | 0                                      | N                                   |
| MRPS25       | 0.649232162                            | N                                            | 0                                      | N                                   |
| HSF4         | 0.649236469                            | N                                            | 2                                      | N                                   |
| UBXN4        | 0.649236469                            | N                                            | 0                                      | N                                   |
| C1orf27      | 0.649241595                            | N                                            | 0                                      | N                                   |
| AC011455.3   | 0.6493841                              | N                                            | 0                                      | N                                   |
| AC025265.1   | 0.6493841                              | N                                            | 0                                      | N                                   |
| AC016205.1   | 0.649592358                            | N                                            | 0                                      | N                                   |
| ADD1         | 0.649592358                            | N                                            | 40                                     | N                                   |
| AL391647.1   | 0.649592358                            | N                                            | 0                                      | N                                   |
| E2F3         | 0.649592358                            | N                                            | 12                                     | N                                   |
| EPHB2        | 0.649592358                            | N                                            | 7                                      | N                                   |
| GREB1L       | 0.649592358                            | N                                            | 0                                      | N                                   |
| AC090220.1   | 0.649672163                            | N                                            | 0                                      | N                                   |
| FARP1        | 0.649672163                            | N                                            | 0                                      | N                                   |
| RUNDC3A      | 0.649672163                            | N                                            | 0                                      | N                                   |
| HNRNPH3      | 0.649753215                            | N                                            | 0                                      | N                                   |
| AC012370.1   | 0.649775989                            | N                                            | 0                                      | N                                   |
| AC016734.1   | 0.649865956                            | N                                            | 0                                      | N                                   |
| RN7SL145P    | 0.64990074                             | N                                            | 0                                      | N                                   |
| AC135279.2   | 0.649941904                            | N                                            | 0                                      | N                                   |
| C12orf10     | 0.649941904                            | N                                            | 0                                      | N                                   |
| NRBP2        | 0.649941904                            | N                                            | 0                                      | N                                   |
| PPT2         | 0.649941904                            | N                                            | 0                                      | N                                   |
| RP11-972P1.7 | 0.649941904                            | N                                            | 0                                      | N                                   |
| TCL6         | 0.649941904                            | N                                            | 0                                      | N                                   |
| TONSL-AS1    | 0.649941904                            | N                                            | 0                                      | N                                   |
| FBXO36       | 0.650646989                            | N                                            | 0                                      | N                                   |
| KRT8P33      | 0.650658546                            | N                                            | 0                                      | N                                   |
| AC004918.1   | 0.650873233                            | N                                            | 0                                      | N                                   |
| CERCAM       | 0.650873233                            | N                                            | 0                                      | N                                   |
| OGFOD3       | 0.650873233                            | N                                            | 1                                      | N                                   |
| MAST4        | 0.650939672                            | N                                            | 0                                      | N                                   |
| NBEAP3       | 0.650939672                            | N                                            | 0                                      | N                                   |
| VN1R2        | 0.651043111                            | N                                            | 0                                      | N                                   |
| ATP5F1P5     | 0.651194129                            | N                                            | 0                                      | N                                   |
| CWF19L2      | 0.651194129                            | N                                            | 0                                      | N                                   |
| AC139792.1   | 0.651331947                            | N                                            | 0                                      | N                                   |
| LRRC1        | 0.651603875                            | N                                            | 0                                      | N                                   |
| SPRTN        | 0.651603875                            | N                                            | 0                                      | N                                   |
| PSMD5        | 0.65163449                             | N                                            | 0                                      | N                                   |
| MAP3K4       | 0.651707513                            | N                                            | 0                                      | N                                   |
| SATB1-AS1    | 0.651707513                            | N                                            | 0                                      | N                                   |
| TMEM64       | 0.651707513                            | N                                            | 0                                      | N                                   |
| FAM124A      | 0.65178673                             | N                                            | 0                                      | N                                   |
| SYT2         | 0.65178673                             | N                                            | 3                                      | N                                   |
| ALDH1L1      | 0.651862847                            | N                                            | 2                                      | N                                   |
| IMMT         | 0.651862847                            | N                                            | 0                                      | N                                   |
| RNASEH1      | 0.651862847                            | N                                            | 0                                      | N                                   |
| NKX6-2       | 0.651889432                            | N                                            | 13                                     | N                                   |
| TMLHE        | 0.651889432                            | N                                            | 0                                      | N                                   |
| AC022150.4   | 0.651899766                            | N                                            | 0                                      | N                                   |
| CSRP2        | 0.651899766                            | N                                            | 1                                      | N                                   |
| ZNF654       | 0.651899766                            | N                                            | 0                                      | N                                   |
| BET1         | 0.651960125                            | N                                            | 0                                      | N                                   |
| AC087752.3   | 0.652158348                            | N                                            | 0                                      | N                                   |

| Gene symbols | FDR (differential expression analysis) | Differentially expressed gene? Y, Yes; N, No | Number of insulin related publications | Insulin related gene? Y, Yes; N, No |
|--------------|----------------------------------------|----------------------------------------------|----------------------------------------|-------------------------------------|
| MEIS3        | 0.652158348                            | N                                            | 5                                      | N                                   |
| PHB          | 0.652158348                            | N                                            | 25                                     | N                                   |
| POLR3DP1     | 0.652158348                            | N                                            | 0                                      | N                                   |
| RYR1         | 0.652158348                            | N                                            | 96                                     | N                                   |
| AL513314.2   | 0.65227497                             | N                                            | 0                                      | N                                   |
| CELSR2       | 0.65227497                             | N                                            | 4                                      | N                                   |
| NDRG4        | 0.65227497                             | N                                            | 2                                      | N                                   |
| SMG6         | 0.65227497                             | N                                            | 3                                      | N                                   |
| TTC21A       | 0.65227497                             | N                                            | 0                                      | N                                   |
| AC021078.1   | 0.652342992                            | N                                            | 0                                      | N                                   |
| AC068620.3   | 0.652342992                            | N                                            | 0                                      | N                                   |
| BTA1F1       | 0.652342992                            | N                                            | 0                                      | N                                   |
| CD99L2       | 0.652342992                            | N                                            | 0                                      | N                                   |
| NABP2        | 0.652342992                            | N                                            | 0                                      | N                                   |
| NTAN1P2      | 0.652342992                            | N                                            | 0                                      | N                                   |
| RPL30P3      | 0.652342992                            | N                                            | 0                                      | N                                   |
| NFYC         | 0.652347852                            | N                                            | 1                                      | N                                   |
| TEK          | 0.652770951                            | N                                            | 20                                     | N                                   |
| FGF4         | 0.652979887                            | N                                            | 15                                     | N                                   |
| CNTD2        | 0.653504595                            | N                                            | 0                                      | N                                   |
| AC012493.1   | 0.653516592                            | N                                            | 0                                      | N                                   |
| COL16A1      | 0.653516592                            | N                                            | 0                                      | N                                   |
| FADS2        | 0.653516592                            | N                                            | 37                                     | N                                   |
| GOLGA2P5     | 0.653516592                            | N                                            | 0                                      | N                                   |
| ITGA9        | 0.653516592                            | N                                            | 1                                      | N                                   |
| ITGB7        | 0.653516592                            | N                                            | 0                                      | N                                   |
| MDGA2        | 0.653516592                            | N                                            | 0                                      | N                                   |
| PAK4         | 0.653516592                            | N                                            | 3                                      | N                                   |
| PREP         | 0.653516592                            | N                                            | 43                                     | N                                   |
| SNED1        | 0.653516592                            | N                                            | 0                                      | N                                   |
| TMEM92       | 0.653516592                            | N                                            | 0                                      | N                                   |
| ZNF227       | 0.653516592                            | N                                            | 0                                      | N                                   |
| DYNLT1       | 0.653529307                            | N                                            | 1                                      | N                                   |
| AC233992.2   | 0.653887798                            | N                                            | 0                                      | N                                   |
| BTBD6P1      | 0.653887798                            | N                                            | 0                                      | N                                   |
| AC025186.1   | 0.653899047                            | N                                            | 0                                      | N                                   |
| ARL8B        | 0.653899047                            | N                                            | 1                                      | N                                   |
| IFNE         | 0.653899047                            | N                                            | 0                                      | N                                   |
| PUS3         | 0.653899047                            | N                                            | 0                                      | N                                   |
| ZNF672       | 0.653899047                            | N                                            | 0                                      | N                                   |
| AC062029.1   | 0.654087572                            | N                                            | 0                                      | N                                   |
| APLN         | 0.654087572                            | N                                            | 276                                    | Y                                   |
| DCAF17       | 0.654087572                            | N                                            | 1                                      | N                                   |
| REN          | 0.654087572                            | N                                            | 1000                                   | Y                                   |
| AC092354.2   | 0.654135362                            | N                                            | 0                                      | N                                   |
| BCL3         | 0.654135362                            | N                                            | 7                                      | N                                   |
| DVL3         | 0.654135362                            | N                                            | 1                                      | N                                   |
| DYNLT3P2     | 0.654135362                            | N                                            | 0                                      | N                                   |
| GOT2         | 0.654135362                            | N                                            | 5                                      | N                                   |
| LINC00612    | 0.654135362                            | N                                            | 0                                      | N                                   |
| MRPL15       | 0.654135362                            | N                                            | 0                                      | N                                   |
| AL365181.3   | 0.654160773                            | N                                            | 0                                      | N                                   |
| AL031666.1   | 0.65423916                             | N                                            | 0                                      | N                                   |
| SLC35E3      | 0.65423916                             | N                                            | 0                                      | N                                   |
| GCDH         | 0.654298045                            | N                                            | 0                                      | N                                   |
| RABGAP1L-IT1 | 0.654347353                            | N                                            | 0                                      | N                                   |
| FBRSL1       | 0.654446343                            | N                                            | 0                                      | N                                   |
| FLT1         | 0.654446343                            | N                                            | 39                                     | N                                   |
| AL022394.1   | 0.654455064                            | N                                            | 0                                      | N                                   |
| BANF1P3      | 0.654455064                            | N                                            | 0                                      | N                                   |
| PQLC3        | 0.654455064                            | N                                            | 0                                      | N                                   |
| REEP5        | 0.654455064                            | N                                            | 0                                      | N                                   |
| RSU1         | 0.654462056                            | N                                            | 0                                      | N                                   |
| SDHCP4       | 0.654462056                            | N                                            | 0                                      | N                                   |
| DEUP1        | 0.654521406                            | N                                            | 0                                      | N                                   |
| TLNRD1       | 0.654822381                            | N                                            | 0                                      | N                                   |

| Gene symbols | FDR (differential expression analysis) | Differentially expressed gene? Y, Yes; N, No | Number of insulin related publications | Insulin related gene? Y, Yes; N, No |
|--------------|----------------------------------------|----------------------------------------------|----------------------------------------|-------------------------------------|
| KCNJ11       | 0.65511924                             | N                                            | 464                                    | Y                                   |
| BACH1-AS1    | 0.655134337                            | N                                            | 0                                      | N                                   |
| DEPDC1-AS1   | 0.655134337                            | N                                            | 0                                      | N                                   |
| MEF2B        | 0.655134337                            | N                                            | 4                                      | N                                   |
| METTL8P1     | 0.655134337                            | N                                            | 0                                      | N                                   |
| MPV17L2      | 0.655134337                            | N                                            | 0                                      | N                                   |
| MSI1         | 0.655134337                            | N                                            | 2                                      | N                                   |
| NFKBIE       | 0.655134337                            | N                                            | 2                                      | N                                   |
| PUM3         | 0.655134337                            | N                                            | 0                                      | N                                   |
| RASA4B       | 0.655134337                            | N                                            | 0                                      | N                                   |
| RMDN2        | 0.655134337                            | N                                            | 0                                      | N                                   |
| RSF1         | 0.655134337                            | N                                            | 0                                      | N                                   |
| TEPP         | 0.655134337                            | N                                            | 1                                      | N                                   |
| ZCCHC18      | 0.655134337                            | N                                            | 0                                      | N                                   |
| AC019226.1   | 0.655472395                            | N                                            | 0                                      | N                                   |
| AC091965.5   | 0.655551639                            | N                                            | 0                                      | N                                   |
| EFNA5        | 0.655551639                            | N                                            | 0                                      | N                                   |
| INTS8        | 0.655551639                            | N                                            | 0                                      | N                                   |
| AC009005.1   | 0.655612886                            | N                                            | 0                                      | N                                   |
| AL355863.1   | 0.655612886                            | N                                            | 0                                      | N                                   |
| IMPDH1P8     | 0.655612886                            | N                                            | 0                                      | N                                   |
| DGKZP1       | 0.655651755                            | N                                            | 0                                      | N                                   |
| AC007126.1   | 0.656170199                            | N                                            | 0                                      | N                                   |
| FAIM         | 0.656170199                            | N                                            | 5                                      | N                                   |
| NMNAT1P3     | 0.656235251                            | N                                            | 0                                      | N                                   |
| MAK16        | 0.656251891                            | N                                            | 0                                      | N                                   |
| ADAM9        | 0.656378891                            | N                                            | 6                                      | N                                   |
| C12orf60     | 0.656378891                            | N                                            | 0                                      | N                                   |
| EDEM1        | 0.656378891                            | N                                            | 4                                      | N                                   |
| HNRNPU       | 0.656378891                            | N                                            | 1                                      | N                                   |
| IGBP1-AS1    | 0.656378891                            | N                                            | 0                                      | N                                   |
| NCKAP5L      | 0.656378891                            | N                                            | 0                                      | N                                   |
| CTAGE12P     | 0.656380211                            | N                                            | 0                                      | N                                   |
| NPR1         | 0.656414746                            | N                                            | 6                                      | N                                   |
| PPP2R3A      | 0.656419421                            | N                                            | 0                                      | N                                   |
| ITGAL        | 0.656812697                            | N                                            | 0                                      | N                                   |
| UTP23        | 0.656924926                            | N                                            | 1                                      | N                                   |
| ZDHHC20      | 0.656939445                            | N                                            | 0                                      | N                                   |
| DYNLL2       | 0.657001873                            | N                                            | 0                                      | N                                   |
| FGF14-AS2    | 0.657001873                            | N                                            | 0                                      | N                                   |
| KIF1BP       | 0.657001873                            | N                                            | 0                                      | N                                   |
| TPI1P1       | 0.65708659                             | N                                            | 0                                      | N                                   |
| AL590652.1   | 0.657399197                            | N                                            | 0                                      | N                                   |
| KLHL41       | 0.657408794                            | N                                            | 0                                      | N                                   |
| NXN          | 0.657408794                            | N                                            | 0                                      | N                                   |
| PES1         | 0.657408794                            | N                                            | 2                                      | N                                   |
| AC074033.1   | 0.657482238                            | N                                            | 0                                      | N                                   |
| AC024581.2   | 0.657587779                            | N                                            | 0                                      | N                                   |
| AL357060.2   | 0.657587779                            | N                                            | 0                                      | N                                   |
| CPNE2        | 0.657587779                            | N                                            | 0                                      | N                                   |
| DDHD1        | 0.657587779                            | N                                            | 1                                      | N                                   |
| GLI2         | 0.657587779                            | N                                            | 18                                     | N                                   |
| ORAI3        | 0.657587779                            | N                                            | 2                                      | N                                   |
| AC079866.2   | 0.657651969                            | N                                            | 0                                      | N                                   |
| DGKZ         | 0.657684566                            | N                                            | 0                                      | N                                   |
| AC023050.4   | 0.657878669                            | N                                            | 0                                      | N                                   |
| AC026471.4   | 0.657878669                            | N                                            | 0                                      | N                                   |
| AC093591.2   | 0.657878669                            | N                                            | 0                                      | N                                   |
| AL512306.2   | 0.657878669                            | N                                            | 0                                      | N                                   |
| AP001160.3   | 0.657878669                            | N                                            | 0                                      | N                                   |
| DCAF16       | 0.657878669                            | N                                            | 0                                      | N                                   |
| ECHS1        | 0.657878669                            | N                                            | 2                                      | N                                   |
| GRAMD1B      | 0.657878669                            | N                                            | 0                                      | N                                   |
| GRWD1        | 0.657878669                            | N                                            | 2                                      | N                                   |
| HOMER1       | 0.657878669                            | N                                            | 1                                      | N                                   |
| INTS10       | 0.657878669                            | N                                            | 0                                      | N                                   |



| Gene symbols   | FDR (differential expression analysis) | Differentially expressed gene? Y, Yes; N, No | Number of insulin related publications | Insulin related gene? Y, Yes; N, No |
|----------------|----------------------------------------|----------------------------------------------|----------------------------------------|-------------------------------------|
| LINC00619      | 0.657878669                            | N                                            | 0                                      | N                                   |
| LRRC43         | 0.657878669                            | N                                            | 0                                      | N                                   |
| MAN2B2         | 0.657878669                            | N                                            | 0                                      | N                                   |
| MPP3           | 0.657878669                            | N                                            | 0                                      | N                                   |
| MRPL41         | 0.657878669                            | N                                            | 0                                      | N                                   |
| MYO16          | 0.657878669                            | N                                            | 2                                      | N                                   |
| NCAM2          | 0.657878669                            | N                                            | 0                                      | N                                   |
| SLC19A1        | 0.657878669                            | N                                            | 4                                      | N                                   |
| VN1R81P        | 0.657878669                            | N                                            | 0                                      | N                                   |
| ZNF815P        | 0.657878669                            | N                                            | 0                                      | N                                   |
| AL133412.1     | 0.65829354                             | N                                            | 0                                      | N                                   |
| RTL9           | 0.658432822                            | N                                            | 0                                      | N                                   |
| HNRNPDL2       | 0.658564991                            | N                                            | 0                                      | N                                   |
| MLX            | 0.658564991                            | N                                            | 68                                     | N                                   |
| MS4A2          | 0.658564991                            | N                                            | 1                                      | N                                   |
| SERPINE1       | 0.658564991                            | N                                            | 141                                    | Y                                   |
| ZSWIM5P3       | 0.65866379                             | N                                            | 0                                      | N                                   |
| HSPB2-C11orf52 | 0.658750034                            | N                                            | 0                                      | N                                   |
| LINC01441      | 0.658750034                            | N                                            | 0                                      | N                                   |
| MMP23B         | 0.658750034                            | N                                            | 0                                      | N                                   |
| AC079684.1     | 0.658754389                            | N                                            | 0                                      | N                                   |
| OPHN1          | 0.658754389                            | N                                            | 0                                      | N                                   |
| TIMM50         | 0.658849028                            | N                                            | 0                                      | N                                   |
| AC025594.3     | 0.658858228                            | N                                            | 0                                      | N                                   |
| AL365181.2     | 0.658858228                            | N                                            | 0                                      | N                                   |
| EEP1           | 0.658858228                            | N                                            | 0                                      | N                                   |
| ZBTB21         | 0.658858228                            | N                                            | 0                                      | N                                   |
| UBL4B          | 0.658919151                            | N                                            | 0                                      | N                                   |
| MEG8           | 0.659095622                            | N                                            | 0                                      | N                                   |
| PIK3CDP1       | 0.659095622                            | N                                            | 0                                      | N                                   |
| RCL1           | 0.659095622                            | N                                            | 0                                      | N                                   |
| ZKSCAN7        | 0.659095622                            | N                                            | 0                                      | N                                   |
| ABI3BP         | 0.659103364                            | N                                            | 0                                      | N                                   |
| AC090826.1     | 0.659103364                            | N                                            | 0                                      | N                                   |
| AC124312.5     | 0.659103364                            | N                                            | 0                                      | N                                   |
| ATP6V1E2       | 0.659103364                            | N                                            | 0                                      | N                                   |
| BOLA3P1        | 0.659103364                            | N                                            | 0                                      | N                                   |
| C12orf76       | 0.659103364                            | N                                            | 0                                      | N                                   |
| DLAT           | 0.659103364                            | N                                            | 1                                      | N                                   |
| EIF1AY         | 0.659103364                            | N                                            | 1                                      | N                                   |
| MRPL48         | 0.659103364                            | N                                            | 0                                      | N                                   |
| RPL31P63       | 0.659103364                            | N                                            | 0                                      | N                                   |
| ZNF551         | 0.659103364                            | N                                            | 0                                      | N                                   |
| BNIP1          | 0.659152567                            | N                                            | 0                                      | N                                   |
| ADCY1          | 0.659187825                            | N                                            | 3                                      | N                                   |
| AL035555.1     | 0.659187825                            | N                                            | 0                                      | N                                   |
| CTTNBP2        | 0.659187825                            | N                                            | 1                                      | N                                   |
| DAPK1          | 0.659187825                            | N                                            | 7                                      | N                                   |
| KRT18P61       | 0.659187825                            | N                                            | 0                                      | N                                   |
| LIN52          | 0.659187825                            | N                                            | 0                                      | N                                   |
| RPL17-C18orf32 | 0.659187825                            | N                                            | 0                                      | N                                   |
| AC156455.1     | 0.659192838                            | N                                            | 0                                      | N                                   |
| AGO4           | 0.659192838                            | N                                            | 0                                      | N                                   |
| BMF            | 0.659192838                            | N                                            | 10                                     | N                                   |
| ETFA           | 0.659192838                            | N                                            | 2                                      | N                                   |
| LINC01424      | 0.659192838                            | N                                            | 0                                      | N                                   |
| LOXL1-AS1      | 0.659192838                            | N                                            | 0                                      | N                                   |
| NMB            | 0.659192838                            | N                                            | 47                                     | N                                   |
| PRR13P5        | 0.659192838                            | N                                            | 0                                      | N                                   |
| SEPT7P7        | 0.659192838                            | N                                            | 0                                      | N                                   |
| SLC4A3         | 0.659192838                            | N                                            | 1                                      | N                                   |
| THUMPD1P1      | 0.659192838                            | N                                            | 0                                      | N                                   |
| AC008982.1     | 0.659231376                            | N                                            | 0                                      | N                                   |
| AL513329.1     | 0.659283912                            | N                                            | 0                                      | N                                   |
| AC005288.1     | 0.659314224                            | N                                            | 0                                      | N                                   |
| AC026992.2     | 0.659314224                            | N                                            | 0                                      | N                                   |

| Gene symbols | FDR (differential expression analysis) | Differentially expressed gene? Y, Yes; N, No | Number of insulin related publications | Insulin related gene? Y, Yes; N, No |
|--------------|----------------------------------------|----------------------------------------------|----------------------------------------|-------------------------------------|
| AC097478.1   | 0.659314224                            | N                                            | 0                                      | N                                   |
| AC112198.4   | 0.659314224                            | N                                            | 0                                      | N                                   |
| AC135050.7   | 0.659314224                            | N                                            | 0                                      | N                                   |
| AL353692.3   | 0.659314224                            | N                                            | 0                                      | N                                   |
| ATF6B        | 0.659314224                            | N                                            | 1                                      | N                                   |
| BLK          | 0.659314224                            | N                                            | 13                                     | N                                   |
| BORCS8-MEF2B | 0.659314224                            | N                                            | 0                                      | N                                   |
| C18orf63     | 0.659314224                            | N                                            | 0                                      | N                                   |
| CAPS2        | 0.659314224                            | N                                            | 5                                      | N                                   |
| CLEC2B       | 0.659314224                            | N                                            | 0                                      | N                                   |
| CNNM4        | 0.659314224                            | N                                            | 1                                      | N                                   |
| CRIP3        | 0.659314224                            | N                                            | 0                                      | N                                   |
| DCXR         | 0.659314224                            | N                                            | 1                                      | N                                   |
| DNAJA1P3     | 0.659314224                            | N                                            | 0                                      | N                                   |
| EIF5A        | 0.659314224                            | N                                            | 11                                     | N                                   |
| EMG1         | 0.659314224                            | N                                            | 1                                      | N                                   |
| ERVK13-1     | 0.659314224                            | N                                            | 0                                      | N                                   |
| FILIP1       | 0.659314224                            | N                                            | 0                                      | N                                   |
| GP1BB        | 0.659314224                            | N                                            | 0                                      | N                                   |
| GTPBP3       | 0.659314224                            | N                                            | 0                                      | N                                   |
| LINC00672    | 0.659314224                            | N                                            | 0                                      | N                                   |
| LNP1         | 0.659314224                            | N                                            | 0                                      | N                                   |
| M6PR         | 0.659314224                            | N                                            | 16                                     | N                                   |
| MRPL35P1     | 0.659314224                            | N                                            | 0                                      | N                                   |
| OSCAR        | 0.659314224                            | N                                            | 39                                     | N                                   |
| PGBD3        | 0.659314224                            | N                                            | 1                                      | N                                   |
| RPS15AP30    | 0.659314224                            | N                                            | 0                                      | N                                   |
| SIL1         | 0.659314224                            | N                                            | 2                                      | N                                   |
| SIX4         | 0.659314224                            | N                                            | 1                                      | N                                   |
| SLC16A9      | 0.659314224                            | N                                            | 2                                      | N                                   |
| SLC6A9       | 0.659314224                            | N                                            | 2                                      | N                                   |
| SP4          | 0.659314224                            | N                                            | 11                                     | N                                   |
| SPATA5L1     | 0.659314224                            | N                                            | 0                                      | N                                   |
| SRRM3        | 0.659314224                            | N                                            | 0                                      | N                                   |
| SULF1        | 0.659314224                            | N                                            | 2                                      | N                                   |
| TCOF1        | 0.659314224                            | N                                            | 0                                      | N                                   |
| TGS1         | 0.659314224                            | N                                            | 0                                      | N                                   |
| TIMM17B      | 0.659314224                            | N                                            | 0                                      | N                                   |
| TM9SF3       | 0.659314224                            | N                                            | 1                                      | N                                   |
| TMEM240      | 0.659314224                            | N                                            | 0                                      | N                                   |
| AC108688.1   | 0.659381474                            | N                                            | 0                                      | N                                   |
| ANKRD62      | 0.659381474                            | N                                            | 0                                      | N                                   |
| NFE2L3       | 0.659381474                            | N                                            | 1                                      | N                                   |
| ZBED8        | 0.659381474                            | N                                            | 0                                      | N                                   |
| AL159169.2   | 0.659464133                            | N                                            | 0                                      | N                                   |
| NUAK1        | 0.659464133                            | N                                            | 6                                      | N                                   |
| AP000662.2   | 0.65950225                             | N                                            | 0                                      | N                                   |
| BTG3         | 0.65950225                             | N                                            | 0                                      | N                                   |
| RN7SL517P    | 0.65950225                             | N                                            | 0                                      | N                                   |
| UBE2G2       | 0.65950225                             | N                                            | 1                                      | N                                   |
| SLC26A1      | 0.65957306                             | N                                            | 0                                      | N                                   |
| BAK1P1       | 0.6596196                              | N                                            | 0                                      | N                                   |
| MORC3        | 0.659620169                            | N                                            | 0                                      | N                                   |
| PLEKHH1      | 0.659620169                            | N                                            | 1                                      | N                                   |
| SRXN1        | 0.659620169                            | N                                            | 0                                      | N                                   |
| WHAMMP2      | 0.659713636                            | N                                            | 0                                      | N                                   |
| VN1R83P      | 0.65979574                             | N                                            | 0                                      | N                                   |
| FOXS1        | 0.659849104                            | N                                            | 0                                      | N                                   |
| HNRNPU-AS1   | 0.659896758                            | N                                            | 0                                      | N                                   |
| KLHDC2       | 0.659896758                            | N                                            | 0                                      | N                                   |
| RPF2P1       | 0.659896758                            | N                                            | 0                                      | N                                   |
| AC008040.1   | 0.659979513                            | N                                            | 0                                      | N                                   |
| AL807752.5   | 0.659979513                            | N                                            | 0                                      | N                                   |
| CMPK2        | 0.659979513                            | N                                            | 0                                      | N                                   |
| EDC4         | 0.659979513                            | N                                            | 0                                      | N                                   |
| TAF1D        | 0.659979513                            | N                                            | 0                                      | N                                   |

| Gene symbols   | FDR (differential expression analysis) | Differentially expressed gene? Y, Yes; N, No | Number of insulin related publications | Insulin related gene? Y, Yes; N, No |
|----------------|----------------------------------------|----------------------------------------------|----------------------------------------|-------------------------------------|
| TXNDC11        | 0.659979513                            | N                                            | 0                                      | N                                   |
| LGR4           | 0.660290881                            | N                                            | 9                                      | N                                   |
| LINC01930      | 0.660290881                            | N                                            | 0                                      | N                                   |
| IFITM10        | 0.6603066                              | N                                            | 0                                      | N                                   |
| ZNF768         | 0.6603066                              | N                                            | 0                                      | N                                   |
| AC091013.1     | 0.660327716                            | N                                            | 0                                      | N                                   |
| AL139095.2     | 0.660327716                            | N                                            | 0                                      | N                                   |
| AC104212.1     | 0.660454589                            | N                                            | 0                                      | N                                   |
| AL157396.1     | 0.660454589                            | N                                            | 0                                      | N                                   |
| BLOC1S5-TXNDC5 | 0.660454589                            | N                                            | 0                                      | N                                   |
| CDC6           | 0.660454589                            | N                                            | 4                                      | N                                   |
| FBXO21         | 0.660454589                            | N                                            | 0                                      | N                                   |
| HSPA8P1        | 0.660454589                            | N                                            | 0                                      | N                                   |
| SZRD1          | 0.660454589                            | N                                            | 0                                      | N                                   |
| ZNF969P        | 0.660454589                            | N                                            | 0                                      | N                                   |
| AL353719.1     | 0.660495664                            | N                                            | 0                                      | N                                   |
| AL591845.1     | 0.660495664                            | N                                            | 0                                      | N                                   |
| CUL5           | 0.660495664                            | N                                            | 1                                      | N                                   |
| HMGB3P22       | 0.660495664                            | N                                            | 0                                      | N                                   |
| MSLN           | 0.660495664                            | N                                            | 3                                      | N                                   |
| ADPRM          | 0.660559418                            | N                                            | 0                                      | N                                   |
| PROS1          | 0.660559418                            | N                                            | 0                                      | N                                   |
| AC007878.1     | 0.66065218                             | N                                            | 0                                      | N                                   |
| AC018620.1     | 0.66065218                             | N                                            | 0                                      | N                                   |
| AD001527.2     | 0.66065218                             | N                                            | 0                                      | N                                   |
| AL049650.1     | 0.66065218                             | N                                            | 0                                      | N                                   |
| AL121906.2     | 0.66065218                             | N                                            | 0                                      | N                                   |
| C16orf46       | 0.66065218                             | N                                            | 0                                      | N                                   |
| C1orf140       | 0.66065218                             | N                                            | 0                                      | N                                   |
| CLPX           | 0.66065218                             | N                                            | 0                                      | N                                   |
| CSMD3          | 0.66065218                             | N                                            | 0                                      | N                                   |
| LINC00562      | 0.66065218                             | N                                            | 0                                      | N                                   |
| MAPK12         | 0.66065218                             | N                                            | 1                                      | N                                   |
| MYCBP2-AS1     | 0.66065218                             | N                                            | 0                                      | N                                   |
| MYH3           | 0.66065218                             | N                                            | 6                                      | N                                   |
| PTPN3          | 0.66065218                             | N                                            | 3                                      | N                                   |
| RIC8A          | 0.66065218                             | N                                            | 0                                      | N                                   |
| SV2B           | 0.66065218                             | N                                            | 2                                      | N                                   |
| TERT           | 0.66065218                             | N                                            | 259                                    | Y                                   |
| TRMT10C        | 0.66065218                             | N                                            | 0                                      | N                                   |
| ZDHHC16        | 0.66065218                             | N                                            | 0                                      | N                                   |
| GPR176         | 0.660785373                            | N                                            | 0                                      | N                                   |
| APTX           | 0.660870194                            | N                                            | 1                                      | N                                   |
| MIIIP          | 0.661013696                            | N                                            | 4                                      | N                                   |
| FAM32A         | 0.661082705                            | N                                            | 0                                      | N                                   |
| AC096636.1     | 0.661102643                            | N                                            | 0                                      | N                                   |
| AC099521.3     | 0.661102643                            | N                                            | 0                                      | N                                   |
| CROT           | 0.661102643                            | N                                            | 4                                      | N                                   |
| METTL21AP1     | 0.661102643                            | N                                            | 0                                      | N                                   |
| UBQLN2         | 0.661102643                            | N                                            | 1                                      | N                                   |
| AC127070.4     | 0.661127393                            | N                                            | 0                                      | N                                   |
| ZNF764         | 0.661441114                            | N                                            | 0                                      | N                                   |
| RGP1           | 0.66198662                             | N                                            | 0                                      | N                                   |
| AC234582.2     | 0.661989473                            | N                                            | 0                                      | N                                   |
| AP005482.3     | 0.661989473                            | N                                            | 0                                      | N                                   |
| KPNA6          | 0.661989473                            | N                                            | 0                                      | N                                   |
| MCM6           | 0.661989473                            | N                                            | 7                                      | N                                   |
| TRDMT1         | 0.661989473                            | N                                            | 0                                      | N                                   |
| YTHDF1P1       | 0.661989473                            | N                                            | 0                                      | N                                   |
| RAB5A          | 0.662095828                            | N                                            | 9                                      | N                                   |
| CORO6          | 0.662196461                            | N                                            | 0                                      | N                                   |
| AC011337.1     | 0.662346401                            | N                                            | 0                                      | N                                   |
| HMGA1P4        | 0.662439053                            | N                                            | 0                                      | N                                   |
| AC138761.4     | 0.662576889                            | N                                            | 0                                      | N                                   |
| AL023280.1     | 0.662576889                            | N                                            | 0                                      | N                                   |
| AL451062.2     | 0.662576889                            | N                                            | 0                                      | N                                   |

| Gene symbols | FDR (differential expression analysis) | Differentially expressed gene? Y, Yes; N, No | Number of insulin related publications | Insulin related gene? Y, Yes; N, No |
|--------------|----------------------------------------|----------------------------------------------|----------------------------------------|-------------------------------------|
| C9orf50      | 0.662576889                            | N                                            | 0                                      | N                                   |
| MKL2         | 0.662576889                            | N                                            | 2                                      | N                                   |
| PHLPP1       | 0.662576889                            | N                                            | 17                                     | N                                   |
| POSTN        | 0.662576889                            | N                                            | 11                                     | N                                   |
| SNRPD2P1     | 0.662576889                            | N                                            | 0                                      | N                                   |
| FLNA         | 0.6625934                              | N                                            | 6                                      | N                                   |
| GLI1         | 0.662684517                            | N                                            | 50                                     | N                                   |
| FAM160B2     | 0.662895903                            | N                                            | 0                                      | N                                   |
| FAM198A      | 0.662895903                            | N                                            | 0                                      | N                                   |
| SHISA4       | 0.662903964                            | N                                            | 0                                      | N                                   |
| AC004884.1   | 0.662972062                            | N                                            | 0                                      | N                                   |
| CORO7        | 0.662972062                            | N                                            | 0                                      | N                                   |
| KCNG1        | 0.662972062                            | N                                            | 0                                      | N                                   |
| MCFD2P1      | 0.662972062                            | N                                            | 0                                      | N                                   |
| MKLN1-AS     | 0.662972062                            | N                                            | 0                                      | N                                   |
| MRPL36       | 0.662972062                            | N                                            | 0                                      | N                                   |
| MRPS21       | 0.662972062                            | N                                            | 0                                      | N                                   |
| GRB14        | 0.663003691                            | N                                            | 71                                     | N                                   |
| ACLY         | 0.663232375                            | N                                            | 29                                     | N                                   |
| AL034546.1   | 0.663232375                            | N                                            | 0                                      | N                                   |
| AL158163.2   | 0.663232375                            | N                                            | 0                                      | N                                   |
| RNF208       | 0.663232375                            | N                                            | 0                                      | N                                   |
| STK11        | 0.663272432                            | N                                            | 108                                    | Y                                   |
| ADAM8        | 0.66327824                             | N                                            | 2                                      | N                                   |
| CERKL        | 0.66327824                             | N                                            | 1                                      | N                                   |
| CHADL        | 0.66327824                             | N                                            | 0                                      | N                                   |
| LIPT2        | 0.66327824                             | N                                            | 0                                      | N                                   |
| ANKRD13A     | 0.66338544                             | N                                            | 0                                      | N                                   |
| B3GNT4       | 0.66338544                             | N                                            | 0                                      | N                                   |
| SMYD3-IT1    | 0.66338544                             | N                                            | 0                                      | N                                   |
| AC009113.1   | 0.663410049                            | N                                            | 0                                      | N                                   |
| AL121594.3   | 0.663410049                            | N                                            | 0                                      | N                                   |
| CBLN2        | 0.663410049                            | N                                            | 0                                      | N                                   |
| CLN8         | 0.663410049                            | N                                            | 1                                      | N                                   |
| TBPL2        | 0.663410049                            | N                                            | 1                                      | N                                   |
| ZMAT1        | 0.663410049                            | N                                            | 0                                      | N                                   |
| AC010326.4   | 0.663423019                            | N                                            | 0                                      | N                                   |
| AC020663.3   | 0.663423019                            | N                                            | 0                                      | N                                   |
| AC098617.1   | 0.663423019                            | N                                            | 0                                      | N                                   |
| AC098936.1   | 0.663423019                            | N                                            | 0                                      | N                                   |
| C20orf144    | 0.663423019                            | N                                            | 0                                      | N                                   |
| CACNA1H      | 0.663423019                            | N                                            | 4                                      | N                                   |
| E2F2         | 0.663423019                            | N                                            | 9                                      | N                                   |
| EXOSC10      | 0.663423019                            | N                                            | 0                                      | N                                   |
| FARSBP1      | 0.663423019                            | N                                            | 0                                      | N                                   |
| GATB         | 0.663423019                            | N                                            | 0                                      | N                                   |
| GRAP2        | 0.663423019                            | N                                            | 0                                      | N                                   |
| KDM2B        | 0.663423019                            | N                                            | 0                                      | N                                   |
| LINC02397    | 0.663423019                            | N                                            | 0                                      | N                                   |
| MED14OS      | 0.663423019                            | N                                            | 0                                      | N                                   |
| NME6         | 0.663423019                            | N                                            | 0                                      | N                                   |
| RP11-435O5.2 | 0.663423019                            | N                                            | 0                                      | N                                   |
| RPS4Y1       | 0.663423019                            | N                                            | 1                                      | N                                   |
| RUSC1-AS1    | 0.663423019                            | N                                            | 0                                      | N                                   |
| URGCP        | 0.663423019                            | N                                            | 0                                      | N                                   |
| ZBTB42       | 0.663423019                            | N                                            | 2                                      | N                                   |
| EVI2B        | 0.663471828                            | N                                            | 0                                      | N                                   |
| ETFDH        | 0.663671283                            | N                                            | 3                                      | N                                   |
| PFN1P2       | 0.663911172                            | N                                            | 0                                      | N                                   |
| KRT8P46      | 0.664036438                            | N                                            | 0                                      | N                                   |
| AC004801.2   | 0.664048733                            | N                                            | 0                                      | N                                   |
| NDUFAF1      | 0.664048733                            | N                                            | 1                                      | N                                   |
| ZNF572       | 0.664048733                            | N                                            | 0                                      | N                                   |
| ERC1         | 0.664071033                            | N                                            | 0                                      | N                                   |
| RUSC1        | 0.664203637                            | N                                            | 0                                      | N                                   |
| TC2N         | 0.664209982                            | N                                            | 0                                      | N                                   |

| Gene symbols | FDR (differential expression analysis) | Differentially expressed gene? Y, Yes; N, No | Number of insulin related publications | Insulin related gene? Y, Yes; N, No |
|--------------|----------------------------------------|----------------------------------------------|----------------------------------------|-------------------------------------|
| TNFSF11      | 0.664209982                            | N                                            | 66                                     | N                                   |
| TSPOAP1      | 0.664209982                            | N                                            | 0                                      | N                                   |
| WDR47        | 0.664209982                            | N                                            | 0                                      | N                                   |
| ZNF35        | 0.664209982                            | N                                            | 0                                      | N                                   |
| EFHD2        | 0.664336294                            | N                                            | 0                                      | N                                   |
| LINC01600    | 0.664336294                            | N                                            | 0                                      | N                                   |
| PPP1R11      | 0.664461196                            | N                                            | 2                                      | N                                   |
| ZBTB37       | 0.664566434                            | N                                            | 0                                      | N                                   |
| ZMPSTE24     | 0.664566434                            | N                                            | 13                                     | N                                   |
| LINC00384    | 0.664613187                            | N                                            | 0                                      | N                                   |
| FSIP1        | 0.664664236                            | N                                            | 0                                      | N                                   |
| AP002884.3   | 0.664696104                            | N                                            | 0                                      | N                                   |
| NTNG2        | 0.664696104                            | N                                            | 0                                      | N                                   |
| NUDT6        | 0.664696104                            | N                                            | 0                                      | N                                   |
| PTGES3P1     | 0.664696104                            | N                                            | 0                                      | N                                   |
| RN7SL75P     | 0.664696104                            | N                                            | 0                                      | N                                   |
| SETD8P1      | 0.664696104                            | N                                            | 0                                      | N                                   |
| SNORD17      | 0.664696104                            | N                                            | 0                                      | N                                   |
| WDR86        | 0.664696104                            | N                                            | 0                                      | N                                   |
| ZNF493       | 0.664696104                            | N                                            | 0                                      | N                                   |
| PNO1         | 0.664707736                            | N                                            | 0                                      | N                                   |
| AC009090.5   | 0.66501766                             | N                                            | 0                                      | N                                   |
| MRPS31P5     | 0.66501766                             | N                                            | 0                                      | N                                   |
| NSFLIC       | 0.665096816                            | N                                            | 0                                      | N                                   |
| ABCA6        | 0.665229284                            | N                                            | 3                                      | N                                   |
| AC099778.1   | 0.665229284                            | N                                            | 0                                      | N                                   |
| GCC1         | 0.665229284                            | N                                            | 1                                      | N                                   |
| RPL7P9       | 0.665229284                            | N                                            | 0                                      | N                                   |
| APPL1        | 0.665297985                            | N                                            | 87                                     | N                                   |
| DENR         | 0.665297985                            | N                                            | 0                                      | N                                   |
| GOLPH3L      | 0.665297985                            | N                                            | 0                                      | N                                   |
| PLAG1        | 0.665297985                            | N                                            | 29                                     | N                                   |
| SOX2-OT      | 0.665297985                            | N                                            | 0                                      | N                                   |
| TM4SF1-AS1   | 0.665297985                            | N                                            | 0                                      | N                                   |
| AC008026.2   | 0.665306471                            | N                                            | 0                                      | N                                   |
| DDRK1        | 0.665306471                            | N                                            | 0                                      | N                                   |
| AC006978.1   | 0.665403063                            | N                                            | 0                                      | N                                   |
| AC015922.4   | 0.665403063                            | N                                            | 0                                      | N                                   |
| ALG9         | 0.665403063                            | N                                            | 0                                      | N                                   |
| BDP1         | 0.665403063                            | N                                            | 0                                      | N                                   |
| CIPC         | 0.665403063                            | N                                            | 0                                      | N                                   |
| GNB1         | 0.665403063                            | N                                            | 1                                      | N                                   |
| MELTF-AS1    | 0.665403063                            | N                                            | 0                                      | N                                   |
| OS9          | 0.665403063                            | N                                            | 2                                      | N                                   |
| RNF13        | 0.665403063                            | N                                            | 0                                      | N                                   |
| RPN1         | 0.665403063                            | N                                            | 1                                      | N                                   |
| SYTL3        | 0.665403063                            | N                                            | 0                                      | N                                   |
| TM7SF3       | 0.665403063                            | N                                            | 1                                      | N                                   |
| TRPM6        | 0.665403063                            | N                                            | 14                                     | N                                   |
| VPS54        | 0.665403063                            | N                                            | 0                                      | N                                   |
| VSIG1        | 0.665403063                            | N                                            | 0                                      | N                                   |
| LINC01619    | 0.665528347                            | N                                            | 0                                      | N                                   |
| SNORD15A     | 0.665677402                            | N                                            | 0                                      | N                                   |
| AC116407.4   | 0.665710949                            | N                                            | 0                                      | N                                   |
| AC009961.1   | 0.665726094                            | N                                            | 0                                      | N                                   |
| CES4A        | 0.665726094                            | N                                            | 0                                      | N                                   |
| MYOZ3        | 0.665726094                            | N                                            | 1                                      | N                                   |
| TMEM167A     | 0.665726094                            | N                                            | 0                                      | N                                   |
| EHMT2        | 0.665771979                            | N                                            | 5                                      | N                                   |
| FCGRT        | 0.665771979                            | N                                            | 2                                      | N                                   |
| LAMB4        | 0.665771979                            | N                                            | 0                                      | N                                   |
| LCORL        | 0.665771979                            | N                                            | 1                                      | N                                   |
| LUC7L2       | 0.665771979                            | N                                            | 0                                      | N                                   |
| TIGD1        | 0.665771979                            | N                                            | 0                                      | N                                   |
| AC108002.1   | 0.666007206                            | N                                            | 0                                      | N                                   |
| KCNQ3        | 0.666007206                            | N                                            | 1                                      | N                                   |

| Gene symbols | FDR (differential expression analysis) | Differentially expressed gene? Y, Yes; N, No | Number of insulin related publications | Insulin related gene? Y, Yes; N, No |
|--------------|----------------------------------------|----------------------------------------------|----------------------------------------|-------------------------------------|
| MGAT1        | 0.666007206                            | N                                            | 9                                      | N                                   |
| RIC3         | 0.666007206                            | N                                            | 0                                      | N                                   |
| UACA         | 0.666007206                            | N                                            | 1                                      | N                                   |
| UQCC1        | 0.666007206                            | N                                            | 0                                      | N                                   |
| KCNH2        | 0.666043585                            | N                                            | 9                                      | N                                   |
| CORO2A       | 0.666055068                            | N                                            | 0                                      | N                                   |
| AC126773.4   | 0.666143616                            | N                                            | 0                                      | N                                   |
| DNM1P51      | 0.666143616                            | N                                            | 0                                      | N                                   |
| MTHFD2       | 0.666143616                            | N                                            | 0                                      | N                                   |
| ZNF195       | 0.666143616                            | N                                            | 1                                      | N                                   |
| SERTAD3      | 0.666267081                            | N                                            | 0                                      | N                                   |
| AC011611.5   | 0.666440917                            | N                                            | 0                                      | N                                   |
| AC015656.1   | 0.666440917                            | N                                            | 0                                      | N                                   |
| AC015813.5   | 0.666440917                            | N                                            | 0                                      | N                                   |
| AL132655.2   | 0.666440917                            | N                                            | 0                                      | N                                   |
| DCDC1        | 0.666440917                            | N                                            | 0                                      | N                                   |
| EGR2         | 0.666440917                            | N                                            | 22                                     | N                                   |
| HERC2        | 0.666440917                            | N                                            | 0                                      | N                                   |
| HKDC1        | 0.666440917                            | N                                            | 5                                      | N                                   |
| RHOV         | 0.666440917                            | N                                            | 0                                      | N                                   |
| AC026191.1   | 0.666493881                            | N                                            | 0                                      | N                                   |
| HDHD5        | 0.666493881                            | N                                            | 0                                      | N                                   |
| INTS6L       | 0.666774429                            | N                                            | 0                                      | N                                   |
| AC010636.2   | 0.66701419                             | N                                            | 0                                      | N                                   |
| API5P1       | 0.66701419                             | N                                            | 0                                      | N                                   |
| AGAP2        | 0.66729597                             | N                                            | 5                                      | N                                   |
| DDN-AS1      | 0.66729597                             | N                                            | 0                                      | N                                   |
| MKS1         | 0.66729597                             | N                                            | 1                                      | N                                   |
| RP11-28F1.2  | 0.667306417                            | N                                            | 0                                      | N                                   |
| LINC00221    | 0.667359704                            | N                                            | 0                                      | N                                   |
| SLC39A11     | 0.667374577                            | N                                            | 1                                      | N                                   |
| ANKRD36      | 0.667750109                            | N                                            | 0                                      | N                                   |
| ARAP1        | 0.667750109                            | N                                            | 7                                      | N                                   |
| C1orf167     | 0.667750109                            | N                                            | 0                                      | N                                   |
| NUP188       | 0.667750109                            | N                                            | 0                                      | N                                   |
| OAF          | 0.667750109                            | N                                            | 1                                      | N                                   |
| SVBP         | 0.667750109                            | N                                            | 0                                      | N                                   |
| TCEA1P4      | 0.667750109                            | N                                            | 0                                      | N                                   |
| ACADSB       | 0.667888914                            | N                                            | 0                                      | N                                   |
| CPNE3        | 0.66790155                             | N                                            | 0                                      | N                                   |
| LINC02495    | 0.66790155                             | N                                            | 0                                      | N                                   |
| SNN          | 0.668052823                            | N                                            | 3                                      | N                                   |
| ACAT2        | 0.668145245                            | N                                            | 8                                      | N                                   |
| PSG6         | 0.668179417                            | N                                            | 0                                      | N                                   |
| GABARAPL1    | 0.668319679                            | N                                            | 11                                     | N                                   |
| MYO5A        | 0.668319679                            | N                                            | 14                                     | N                                   |
| G6PD         | 0.668471119                            | N                                            | 141                                    | Y                                   |
| PAIP1        | 0.668471119                            | N                                            | 1                                      | N                                   |
| QPCT         | 0.668603731                            | N                                            | 0                                      | N                                   |
| SOGA1        | 0.668603731                            | N                                            | 2                                      | N                                   |
| INA          | 0.668613631                            | N                                            | 67                                     | N                                   |
| KCNK10       | 0.668803904                            | N                                            | 3                                      | N                                   |
| TMEM261P1    | 0.668803904                            | N                                            | 0                                      | N                                   |
| ANKRA2       | 0.668856596                            | N                                            | 0                                      | N                                   |
| KLHDC8B      | 0.668856596                            | N                                            | 0                                      | N                                   |
| ST6GAL2      | 0.668856596                            | N                                            | 0                                      | N                                   |
| AC093827.3   | 0.66899741                             | N                                            | 0                                      | N                                   |
| AC116347.1   | 0.66899741                             | N                                            | 0                                      | N                                   |
| AL358178.1   | 0.66899741                             | N                                            | 0                                      | N                                   |
| ALKBH1       | 0.66899741                             | N                                            | 0                                      | N                                   |
| COG8         | 0.66899741                             | N                                            | 0                                      | N                                   |
| DEGS2        | 0.66899741                             | N                                            | 0                                      | N                                   |
| ELK3         | 0.66899741                             | N                                            | 2                                      | N                                   |
| FLOT2        | 0.66899741                             | N                                            | 2                                      | N                                   |
| LAMP3        | 0.66899741                             | N                                            | 1                                      | N                                   |
| NMRAL2P      | 0.66899741                             | N                                            | 0                                      | N                                   |

| Gene symbols | FDR (differential expression analysis) | Differentially expressed gene? Y, Yes; N, No | Number of insulin related publications | Insulin related gene? Y, Yes; N, No |
|--------------|----------------------------------------|----------------------------------------------|----------------------------------------|-------------------------------------|
| ORC5         | 0.66899741                             | N                                            | 0                                      | N                                   |
| PDK2         | 0.66899741                             | N                                            | 39                                     | N                                   |
| RGS5         | 0.66899741                             | N                                            | 5                                      | N                                   |
| THRA         | 0.66899741                             | N                                            | 6                                      | N                                   |
| ECI2         | 0.669018017                            | N                                            | 0                                      | N                                   |
| AC005070.3   | 0.669068333                            | N                                            | 0                                      | N                                   |
| DCUN1D2      | 0.669068333                            | N                                            | 0                                      | N                                   |
| AC008393.1   | 0.669080165                            | N                                            | 0                                      | N                                   |
| AC016629.3   | 0.669080165                            | N                                            | 0                                      | N                                   |
| AL121895.1   | 0.669080165                            | N                                            | 0                                      | N                                   |
| FRMD5        | 0.669080165                            | N                                            | 0                                      | N                                   |
| HMGB1P8      | 0.669080165                            | N                                            | 0                                      | N                                   |
| MRPS18C      | 0.669080165                            | N                                            | 0                                      | N                                   |
| MTMR10       | 0.669080165                            | N                                            | 0                                      | N                                   |
| PLEKHO1      | 0.669080165                            | N                                            | 1                                      | N                                   |
| RPL3L        | 0.669080165                            | N                                            | 0                                      | N                                   |
| TNFRSF13C    | 0.669080165                            | N                                            | 2                                      | N                                   |
| TTPA         | 0.669080165                            | N                                            | 991                                    | Y                                   |
| TXNDC16      | 0.669080165                            | N                                            | 0                                      | N                                   |
| ZNF524       | 0.669080165                            | N                                            | 0                                      | N                                   |
| AC138811.2   | 0.669087199                            | N                                            | 0                                      | N                                   |
| ARFRP1       | 0.669087199                            | N                                            | 3                                      | N                                   |
| CHST13       | 0.669087199                            | N                                            | 0                                      | N                                   |
| CIRBP        | 0.669087199                            | N                                            | 4                                      | N                                   |
| DSTN         | 0.669087199                            | N                                            | 0                                      | N                                   |
| ASPH         | 0.669244311                            | N                                            | 10                                     | N                                   |
| LINC01524    | 0.669244311                            | N                                            | 0                                      | N                                   |
| PLAT         | 0.669244311                            | N                                            | 41                                     | N                                   |
| AC063952.2   | 0.669284595                            | N                                            | 0                                      | N                                   |
| AC090589.1   | 0.669284595                            | N                                            | 0                                      | N                                   |
| AC092123.2   | 0.669284595                            | N                                            | 0                                      | N                                   |
| AP000766.1   | 0.669284595                            | N                                            | 0                                      | N                                   |
| BAG4         | 0.669284595                            | N                                            | 1                                      | N                                   |
| ETS2         | 0.669284595                            | N                                            | 7                                      | N                                   |
| FERMT3       | 0.669284595                            | N                                            | 0                                      | N                                   |
| GPLD1        | 0.669284595                            | N                                            | 4                                      | N                                   |
| HLA-DOB      | 0.669284595                            | N                                            | 0                                      | N                                   |
| LACTB        | 0.669284595                            | N                                            | 1                                      | N                                   |
| LRRC17       | 0.669284595                            | N                                            | 0                                      | N                                   |
| Metazoa_SRP  | 0.669284595                            | N                                            | 0                                      | N                                   |
| MYO5C        | 0.669284595                            | N                                            | 0                                      | N                                   |
| NMNAT1       | 0.669284595                            | N                                            | 1                                      | N                                   |
| PDE3A        | 0.669284595                            | N                                            | 12                                     | N                                   |
| PEX26        | 0.669284595                            | N                                            | 0                                      | N                                   |
| RFX2         | 0.669284595                            | N                                            | 0                                      | N                                   |
| RN7SL200P    | 0.669284595                            | N                                            | 0                                      | N                                   |
| SUCO         | 0.669284595                            | N                                            | 0                                      | N                                   |
| VGFB         | 0.669392184                            | N                                            | 23                                     | N                                   |
| ATP2B1-AS1   | 0.669491253                            | N                                            | 0                                      | N                                   |
| CLCC1        | 0.669566138                            | N                                            | 0                                      | N                                   |
| DCDC2        | 0.669566138                            | N                                            | 0                                      | N                                   |
| LINC02361    | 0.669566138                            | N                                            | 0                                      | N                                   |
| MGAT4A       | 0.669566138                            | N                                            | 2                                      | N                                   |
| SMIM1        | 0.669566138                            | N                                            | 0                                      | N                                   |
| YY2          | 0.66965849                             | N                                            | 1                                      | N                                   |
| KCTD21-AS1   | 0.669713565                            | N                                            | 0                                      | N                                   |
| RPS10        | 0.669713565                            | N                                            | 0                                      | N                                   |
| ST8SIA6-AS1  | 0.669713565                            | N                                            | 0                                      | N                                   |
| AC079921.2   | 0.669758643                            | N                                            | 0                                      | N                                   |
| SAMMSON      | 0.669758643                            | N                                            | 0                                      | N                                   |
| AC069277.1   | 0.669842425                            | N                                            | 0                                      | N                                   |
| AL049775.1   | 0.669842425                            | N                                            | 0                                      | N                                   |
| LRSAM1       | 0.669842425                            | N                                            | 0                                      | N                                   |
| NDUFA12      | 0.669842425                            | N                                            | 0                                      | N                                   |
| PPP1R1C      | 0.669842425                            | N                                            | 0                                      | N                                   |
| URB1         | 0.669842425                            | N                                            | 0                                      | N                                   |

| Gene symbols | FDR (differential expression analysis) | Differentially expressed gene? Y, Yes; N, No | Number of insulin related publications | Insulin related gene? Y, Yes; N, No |
|--------------|----------------------------------------|----------------------------------------------|----------------------------------------|-------------------------------------|
| DDX28        | 0.670041901                            | N                                            | 0                                      | N                                   |
| AC145423.3   | 0.670091447                            | N                                            | 0                                      | N                                   |
| TEX11        | 0.670091447                            | N                                            | 0                                      | N                                   |
| PKP4P1       | 0.670140385                            | N                                            | 0                                      | N                                   |
| ACTBP13      | 0.670167769                            | N                                            | 0                                      | N                                   |
| PSMD13       | 0.670244124                            | N                                            | 0                                      | N                                   |
| FAM86EP      | 0.670318859                            | N                                            | 0                                      | N                                   |
| AC007216.3   | 0.670450565                            | N                                            | 0                                      | N                                   |
| AC026362.1   | 0.670450565                            | N                                            | 0                                      | N                                   |
| DNAJB6       | 0.670450565                            | N                                            | 0                                      | N                                   |
| CBWD5        | 0.670474369                            | N                                            | 0                                      | N                                   |
| UBE2Q1       | 0.670474369                            | N                                            | 0                                      | N                                   |
| AC008677.1   | 0.67061371                             | N                                            | 0                                      | N                                   |
| AC009318.1   | 0.670614278                            | N                                            | 0                                      | N                                   |
| XPNPEP3      | 0.670614278                            | N                                            | 0                                      | N                                   |
| ME2P1        | 0.670617351                            | N                                            | 0                                      | N                                   |
| DPH7         | 0.67063278                             | N                                            | 0                                      | N                                   |
| TTC30A       | 0.670750441                            | N                                            | 0                                      | N                                   |
| HAND2-AS1    | 0.670984915                            | N                                            | 1                                      | N                                   |
| BRWD1-AS2    | 0.671032362                            | N                                            | 0                                      | N                                   |
| LARP6        | 0.671034896                            | N                                            | 5                                      | N                                   |
| PCNAP4       | 0.671034896                            | N                                            | 0                                      | N                                   |
| AC106886.1   | 0.67112709                             | N                                            | 0                                      | N                                   |
| XPA          | 0.67112709                             | N                                            | 6                                      | N                                   |
| ADRA1D       | 0.671256625                            | N                                            | 5                                      | N                                   |
| AC020915.1   | 0.671257864                            | N                                            | 0                                      | N                                   |
| ARHGEF25     | 0.671257864                            | N                                            | 0                                      | N                                   |
| ARID4A       | 0.671257864                            | N                                            | 4                                      | N                                   |
| ASRGL1       | 0.671257864                            | N                                            | 0                                      | N                                   |
| FTLP3        | 0.671257864                            | N                                            | 0                                      | N                                   |
| GPR162       | 0.671257864                            | N                                            | 1                                      | N                                   |
| PRADC1       | 0.671257864                            | N                                            | 1                                      | N                                   |
| TMEM231      | 0.671257864                            | N                                            | 0                                      | N                                   |
| YAE1D1       | 0.671257864                            | N                                            | 0                                      | N                                   |
| FLJ42393     | 0.671276838                            | N                                            | 0                                      | N                                   |
| MTND2P12     | 0.671402421                            | N                                            | 0                                      | N                                   |
| AC046158.3   | 0.671495042                            | N                                            | 0                                      | N                                   |
| AC061992.1   | 0.67154694                             | N                                            | 0                                      | N                                   |
| ATP5BP1      | 0.67154694                             | N                                            | 0                                      | N                                   |
| LINC01138    | 0.67154694                             | N                                            | 1                                      | N                                   |
| PPFIA2       | 0.67154694                             | N                                            | 0                                      | N                                   |
| ZNF625-ZNF20 | 0.67154694                             | N                                            | 0                                      | N                                   |
| MRPS33       | 0.671591113                            | N                                            | 0                                      | N                                   |
| AL117335.1   | 0.671663884                            | N                                            | 0                                      | N                                   |
| TTC37        | 0.671779152                            | N                                            | 0                                      | N                                   |
| AL354714.5   | 0.671791545                            | N                                            | 0                                      | N                                   |
| AL451064.2   | 0.671791545                            | N                                            | 0                                      | N                                   |
| AL513122.1   | 0.671791545                            | N                                            | 0                                      | N                                   |
| DDX18        | 0.671791545                            | N                                            | 0                                      | N                                   |
| MARS         | 0.671791545                            | N                                            | 63                                     | N                                   |
| USP32        | 0.671791545                            | N                                            | 0                                      | N                                   |
| ZNF682       | 0.671940372                            | N                                            | 0                                      | N                                   |
| MXD4         | 0.67194524                             | N                                            | 0                                      | N                                   |
| RNF122       | 0.67194524                             | N                                            | 1                                      | N                                   |
| ARFIP1       | 0.672235951                            | N                                            | 2                                      | N                                   |
| CTBP2P4      | 0.672235951                            | N                                            | 0                                      | N                                   |
| AL662907.1   | 0.672486086                            | N                                            | 0                                      | N                                   |
| AC108134.2   | 0.672493661                            | N                                            | 0                                      | N                                   |
| ATG3         | 0.672493661                            | N                                            | 8                                      | N                                   |
| CDK17        | 0.672493661                            | N                                            | 0                                      | N                                   |
| ENAH         | 0.672493661                            | N                                            | 2                                      | N                                   |
| RPL38P3      | 0.672493661                            | N                                            | 0                                      | N                                   |
| RUNX3        | 0.672493661                            | N                                            | 13                                     | N                                   |
| YWHABP2      | 0.672493661                            | N                                            | 0                                      | N                                   |
| AATF         | 0.672574831                            | N                                            | 1                                      | N                                   |
| HIRA         | 0.672574831                            | N                                            | 18                                     | N                                   |



| Gene symbols | FDR (differential expression analysis) | Differentially expressed gene? Y, Yes; N, No | Number of insulin related publications | Insulin related gene? Y, Yes; N, No |
|--------------|----------------------------------------|----------------------------------------------|----------------------------------------|-------------------------------------|
| METRNL       | 0.672574831                            | N                                            | 10                                     | N                                   |
| PIK3CD-AS2   | 0.672574831                            | N                                            | 0                                      | N                                   |
| MARC2        | 0.672695069                            | N                                            | 0                                      | N                                   |
| AL360270.2   | 0.672695069                            | N                                            | 0                                      | N                                   |
| ITM2C        | 0.672695069                            | N                                            | 2                                      | N                                   |
| uc_338       | 0.672695069                            | N                                            | 0                                      | N                                   |
| OSGEPL1-AS1  | 0.672718073                            | N                                            | 0                                      | N                                   |
| SLC24A2      | 0.672718073                            | N                                            | 0                                      | N                                   |
| UGCG         | 0.672718073                            | N                                            | 7                                      | N                                   |
| AC026954.2   | 0.672861071                            | N                                            | 0                                      | N                                   |
| AC010132.4   | 0.672877765                            | N                                            | 0                                      | N                                   |
| C1orf122     | 0.672877765                            | N                                            | 0                                      | N                                   |
| DCAF12       | 0.672877765                            | N                                            | 0                                      | N                                   |
| FAM229B      | 0.672877765                            | N                                            | 0                                      | N                                   |
| FREM1        | 0.672877765                            | N                                            | 0                                      | N                                   |
| PDLIM1P1     | 0.672877765                            | N                                            | 0                                      | N                                   |
| POM121L9P    | 0.672877765                            | N                                            | 0                                      | N                                   |
| UBE2L6       | 0.672877765                            | N                                            | 1                                      | N                                   |
| AL160191.1   | 0.672896395                            | N                                            | 0                                      | N                                   |
| AC007598.3   | 0.673031729                            | N                                            | 0                                      | N                                   |
| AC090229.1   | 0.673031729                            | N                                            | 0                                      | N                                   |
| UPF3AP3      | 0.673031729                            | N                                            | 0                                      | N                                   |
| ZNF519       | 0.673031729                            | N                                            | 0                                      | N                                   |
| AL713999.1   | 0.673062282                            | N                                            | 0                                      | N                                   |
| CD320        | 0.673062282                            | N                                            | 0                                      | N                                   |
| DGUOK-AS1    | 0.673062282                            | N                                            | 0                                      | N                                   |
| PHKA2        | 0.673062282                            | N                                            | 1                                      | N                                   |
| PIGC         | 0.673062282                            | N                                            | 0                                      | N                                   |
| VWDE         | 0.673062282                            | N                                            | 0                                      | N                                   |
| MLEC         | 0.673074949                            | N                                            | 0                                      | N                                   |
| AL133551.1   | 0.673146865                            | N                                            | 0                                      | N                                   |
| PPP1R14B     | 0.673146865                            | N                                            | 0                                      | N                                   |
| VKORC1       | 0.673146865                            | N                                            | 2                                      | N                                   |
| CMTM7        | 0.673386773                            | N                                            | 1                                      | N                                   |
| AP006621.2   | 0.673502567                            | N                                            | 0                                      | N                                   |
| DPF2         | 0.673502567                            | N                                            | 0                                      | N                                   |
| SLC25A28     | 0.673502567                            | N                                            | 1                                      | N                                   |
| CAPN2        | 0.673517555                            | N                                            | 5                                      | N                                   |
| HPS3         | 0.673533879                            | N                                            | 1                                      | N                                   |
| SGSH         | 0.673626054                            | N                                            | 1                                      | N                                   |
| AC015871.3   | 0.673685459                            | N                                            | 0                                      | N                                   |
| STX16        | 0.673896129                            | N                                            | 3                                      | N                                   |
| NKAPP1       | 0.674009821                            | N                                            | 0                                      | N                                   |
| TOPORS       | 0.674009821                            | N                                            | 0                                      | N                                   |
| AC027335.2   | 0.674077135                            | N                                            | 0                                      | N                                   |
| ZNF702P      | 0.674077135                            | N                                            | 0                                      | N                                   |
| AC015883.1   | 0.67417464                             | N                                            | 0                                      | N                                   |
| AC124283.5   | 0.67417464                             | N                                            | 0                                      | N                                   |
| AC242426.3   | 0.67417464                             | N                                            | 0                                      | N                                   |
| AL589880.1   | 0.67417464                             | N                                            | 0                                      | N                                   |
| CEP70        | 0.67417464                             | N                                            | 0                                      | N                                   |
| DIO3         | 0.67417464                             | N                                            | 16                                     | N                                   |
| DUSP3        | 0.67417464                             | N                                            | 1                                      | N                                   |
| EMILIN2      | 0.67417464                             | N                                            | 1                                      | N                                   |
| FHIT         | 0.67417464                             | N                                            | 4                                      | N                                   |
| IFT27        | 0.67417464                             | N                                            | 0                                      | N                                   |
| MRPL50       | 0.67417464                             | N                                            | 0                                      | N                                   |
| PPARG        | 0.67417464                             | N                                            | 355                                    | Y                                   |
| SDC2         | 0.67417464                             | N                                            | 3                                      | N                                   |
| SKP1P1       | 0.67417464                             | N                                            | 0                                      | N                                   |
| SLC16A5      | 0.67417464                             | N                                            | 0                                      | N                                   |
| TFPI         | 0.67417464                             | N                                            | 22                                     | N                                   |
| UBE2N        | 0.67417464                             | N                                            | 7                                      | N                                   |
| CYP51A1P1    | 0.674335363                            | N                                            | 0                                      | N                                   |
| DLX4         | 0.674335363                            | N                                            | 2                                      | N                                   |
| EVA1C        | 0.674335363                            | N                                            | 0                                      | N                                   |

| Gene symbols | FDR (differential expression analysis) | Differentially expressed gene? Y, Yes; N, No | Number of insulin related publications | Insulin related gene? Y, Yes; N, No |
|--------------|----------------------------------------|----------------------------------------------|----------------------------------------|-------------------------------------|
| AC022431.1   | 0.674350194                            | N                                            | 0                                      | N                                   |
| MRPL28       | 0.674411513                            | N                                            | 0                                      | N                                   |
| AC104109.3   | 0.674414609                            | N                                            | 0                                      | N                                   |
| AC108751.3   | 0.674414609                            | N                                            | 0                                      | N                                   |
| AP000223.1   | 0.674414609                            | N                                            | 0                                      | N                                   |
| C20orf24     | 0.674414609                            | N                                            | 0                                      | N                                   |
| CHCHD4       | 0.674414609                            | N                                            | 0                                      | N                                   |
| DUOX2        | 0.674414609                            | N                                            | 16                                     | N                                   |
| HIST1H3G     | 0.674414609                            | N                                            | 2                                      | N                                   |
| PRICKLE2-AS3 | 0.674414609                            | N                                            | 0                                      | N                                   |
| REEP3        | 0.674414609                            | N                                            | 0                                      | N                                   |
| TOP3B        | 0.674414609                            | N                                            | 0                                      | N                                   |
| TRAF3IP2-AS1 | 0.674446358                            | N                                            | 0                                      | N                                   |
| DNAJA3       | 0.674521898                            | N                                            | 0                                      | N                                   |
| AL021939.1   | 0.674528482                            | N                                            | 0                                      | N                                   |
| CPA6         | 0.674528482                            | N                                            | 0                                      | N                                   |
| AL353795.1   | 0.674581853                            | N                                            | 0                                      | N                                   |
| CXCL3        | 0.674581853                            | N                                            | 5                                      | N                                   |
| CYB561A3     | 0.674581853                            | N                                            | 0                                      | N                                   |
| DES          | 0.674581853                            | N                                            | 1000                                   | Y                                   |
| GFY          | 0.674581853                            | N                                            | 0                                      | N                                   |
| HPCAL1       | 0.674581853                            | N                                            | 0                                      | N                                   |
| HYAL1        | 0.674581853                            | N                                            | 2                                      | N                                   |
| NDUFB2-AS1   | 0.674581853                            | N                                            | 0                                      | N                                   |
| NTNG1        | 0.674581853                            | N                                            | 1                                      | N                                   |
| SLC25A42     | 0.674581853                            | N                                            | 0                                      | N                                   |
| AC005342.1   | 0.67487971                             | N                                            | 0                                      | N                                   |
| AC007277.1   | 0.67487971                             | N                                            | 0                                      | N                                   |
| AC091152.2   | 0.67487971                             | N                                            | 0                                      | N                                   |
| DSTNP2       | 0.67487971                             | N                                            | 0                                      | N                                   |
| ETF1         | 0.67487971                             | N                                            | 2                                      | N                                   |
| FAM155B      | 0.67487971                             | N                                            | 0                                      | N                                   |
| FAM43A       | 0.67487971                             | N                                            | 0                                      | N                                   |
| NACAD        | 0.67487971                             | N                                            | 0                                      | N                                   |
| OSBPL3       | 0.67487971                             | N                                            | 3                                      | N                                   |
| RN7SKP71     | 0.67487971                             | N                                            | 0                                      | N                                   |
| KIAA0930     | 0.674922763                            | N                                            | 0                                      | N                                   |
| AC009086.3   | 0.674986056                            | N                                            | 0                                      | N                                   |
| AC022868.1   | 0.674986056                            | N                                            | 0                                      | N                                   |
| AC025034.1   | 0.674986056                            | N                                            | 0                                      | N                                   |
| AL390879.2   | 0.674986056                            | N                                            | 0                                      | N                                   |
| HDHD2        | 0.674986056                            | N                                            | 0                                      | N                                   |
| LAMTOR5-AS1  | 0.674986056                            | N                                            | 0                                      | N                                   |
| AC021231.1   | 0.674993475                            | N                                            | 0                                      | N                                   |
| AC127070.2   | 0.674993475                            | N                                            | 0                                      | N                                   |
| MGST1        | 0.675116525                            | N                                            | 3                                      | N                                   |
| ZBTB47       | 0.675116525                            | N                                            | 0                                      | N                                   |
| AC104763.3   | 0.675230361                            | N                                            | 0                                      | N                                   |
| GTF2IRD1P1   | 0.675230361                            | N                                            | 0                                      | N                                   |
| NUDT12       | 0.675230361                            | N                                            | 0                                      | N                                   |
| PHF14        | 0.675230361                            | N                                            | 0                                      | N                                   |
| PMM2         | 0.675230361                            | N                                            | 9                                      | N                                   |
| RBM3         | 0.675230361                            | N                                            | 5                                      | N                                   |
| LINC00526    | 0.675476616                            | N                                            | 0                                      | N                                   |
| BANP         | 0.675514365                            | N                                            | 1                                      | N                                   |
| CCDC154      | 0.675514365                            | N                                            | 0                                      | N                                   |
| ENTPD4       | 0.675514365                            | N                                            | 0                                      | N                                   |
| AC093227.2   | 0.675548167                            | N                                            | 0                                      | N                                   |
| AC097480.1   | 0.675548167                            | N                                            | 0                                      | N                                   |
| ANKS4B       | 0.675548167                            | N                                            | 2                                      | N                                   |
| C11orf80     | 0.675548167                            | N                                            | 0                                      | N                                   |
| CCDC91       | 0.675548167                            | N                                            | 0                                      | N                                   |
| EPB42        | 0.675548167                            | N                                            | 0                                      | N                                   |
| ERVFRD-3     | 0.675548167                            | N                                            | 0                                      | N                                   |
| GRK5-IT1     | 0.675548167                            | N                                            | 0                                      | N                                   |
| LRRC23       | 0.675548167                            | N                                            | 0                                      | N                                   |

| Gene symbols    | FDR (differential expression analysis) | Differentially expressed gene? Y, Yes; N, No | Number of insulin related publications | Insulin related gene? Y, Yes; N, No |
|-----------------|----------------------------------------|----------------------------------------------|----------------------------------------|-------------------------------------|
| PRKAA2          | 0.675548167                            | N                                            | 51                                     | N                                   |
| SH3RF3          | 0.675548167                            | N                                            | 1                                      | N                                   |
| WDR70           | 0.675548167                            | N                                            | 0                                      | N                                   |
| AC026523.2      | 0.675572572                            | N                                            | 0                                      | N                                   |
| PREX2           | 0.675572572                            | N                                            | 3                                      | N                                   |
| FOSL1           | 0.675784148                            | N                                            | 5                                      | N                                   |
| AC092916.2      | 0.675816678                            | N                                            | 0                                      | N                                   |
| ELOCP31         | 0.675816678                            | N                                            | 0                                      | N                                   |
| SCMH1           | 0.675816678                            | N                                            | 0                                      | N                                   |
| VPS52           | 0.675816678                            | N                                            | 0                                      | N                                   |
| C1QBPP2         | 0.675906924                            | N                                            | 0                                      | N                                   |
| KLHL13          | 0.675906924                            | N                                            | 1                                      | N                                   |
| SIRPB1          | 0.675906924                            | N                                            | 2                                      | N                                   |
| AC074043.1      | 0.676101191                            | N                                            | 0                                      | N                                   |
| AC087241.2      | 0.676101191                            | N                                            | 0                                      | N                                   |
| ARL14           | 0.676101191                            | N                                            | 0                                      | N                                   |
| CBWD6           | 0.676101191                            | N                                            | 0                                      | N                                   |
| ERAL1           | 0.676101191                            | N                                            | 0                                      | N                                   |
| GCNT4           | 0.676101191                            | N                                            | 0                                      | N                                   |
| LINC02210-CRHR1 | 0.676101191                            | N                                            | 0                                      | N                                   |
| PCYT2           | 0.676101191                            | N                                            | 8                                      | N                                   |
| SNAPC1          | 0.676101191                            | N                                            | 0                                      | N                                   |
| TEAD2           | 0.676101191                            | N                                            | 1                                      | N                                   |
| TMEM131L        | 0.676101191                            | N                                            | 0                                      | N                                   |
| XRRA1           | 0.676101191                            | N                                            | 0                                      | N                                   |
| AC012360.3      | 0.676584455                            | N                                            | 0                                      | N                                   |
| CCDC36          | 0.676584455                            | N                                            | 0                                      | N                                   |
| GALM            | 0.676584455                            | N                                            | 2                                      | N                                   |
| GPR183          | 0.676584455                            | N                                            | 1                                      | N                                   |
| OGFR            | 0.676584455                            | N                                            | 1                                      | N                                   |
| PRKD1           | 0.676584455                            | N                                            | 3                                      | N                                   |
| AC245452.1      | 0.676677427                            | N                                            | 0                                      | N                                   |
| SH3BP5          | 0.676703971                            | N                                            | 0                                      | N                                   |
| AC024451.2      | 0.676775657                            | N                                            | 0                                      | N                                   |
| CIR1            | 0.676775657                            | N                                            | 0                                      | N                                   |
| DDX41           | 0.676775657                            | N                                            | 0                                      | N                                   |
| FBXO30          | 0.676775657                            | N                                            | 1                                      | N                                   |
| GPATCH2L        | 0.676775657                            | N                                            | 0                                      | N                                   |
| SAP30L          | 0.676775657                            | N                                            | 0                                      | N                                   |
| E4F1            | 0.677093756                            | N                                            | 0                                      | N                                   |
| ZSWIM8          | 0.677093756                            | N                                            | 0                                      | N                                   |
| RGPD5           | 0.677173637                            | N                                            | 0                                      | N                                   |
| CHRAC1          | 0.677249864                            | N                                            | 0                                      | N                                   |
| DRD5            | 0.677249864                            | N                                            | 4                                      | N                                   |
| KDEL3           | 0.677249864                            | N                                            | 0                                      | N                                   |
| LINC00863       | 0.677249864                            | N                                            | 0                                      | N                                   |
| PSMA5           | 0.677249864                            | N                                            | 0                                      | N                                   |
| SLC6A17         | 0.677249864                            | N                                            | 0                                      | N                                   |
| TMEM243         | 0.677249864                            | N                                            | 0                                      | N                                   |
| ZBTB48          | 0.677249864                            | N                                            | 0                                      | N                                   |
| AC211433.1      | 0.677330415                            | N                                            | 0                                      | N                                   |
| BCAS4           | 0.677330415                            | N                                            | 0                                      | N                                   |
| MSTO2P          | 0.677330415                            | N                                            | 0                                      | N                                   |
| SUMF2           | 0.677549788                            | N                                            | 0                                      | N                                   |
| ARMCX2          | 0.677718989                            | N                                            | 0                                      | N                                   |
| CSAD            | 0.677718989                            | N                                            | 3                                      | N                                   |
| AC100821.1      | 0.677899884                            | N                                            | 0                                      | N                                   |
| ACHE            | 0.677899884                            | N                                            | 1000                                   | Y                                   |
| BLMH            | 0.677899884                            | N                                            | 0                                      | N                                   |
| DHFR2           | 0.677899884                            | N                                            | 0                                      | N                                   |
| FAM66D          | 0.677899884                            | N                                            | 0                                      | N                                   |
| GIT2            | 0.677899884                            | N                                            | 1                                      | N                                   |
| GP5             | 0.677899884                            | N                                            | 2                                      | N                                   |
| HINT3           | 0.677899884                            | N                                            | 0                                      | N                                   |
| ITGA9-AS1       | 0.677899884                            | N                                            | 0                                      | N                                   |
| PTPRU           | 0.677899884                            | N                                            | 2                                      | N                                   |

| Gene symbols  | FDR (differential expression analysis) | Differentially expressed gene? Y, Yes; N, No | Number of insulin related publications | Insulin related gene? Y, Yes; N, No |
|---------------|----------------------------------------|----------------------------------------------|----------------------------------------|-------------------------------------|
| TMEM178B      | 0.677899884                            | N                                            | 0                                      | N                                   |
| DBNDD1        | 0.678117554                            | N                                            | 0                                      | N                                   |
| NCOA5         | 0.678117554                            | N                                            | 2                                      | N                                   |
| AC106730.1    | 0.67827774                             | N                                            | 0                                      | N                                   |
| C8orf48       | 0.678399026                            | N                                            | 0                                      | N                                   |
| THUMPD1       | 0.678402559                            | N                                            | 0                                      | N                                   |
| PREB          | 0.678494389                            | N                                            | 9                                      | N                                   |
| AL157935.2    | 0.67850642                             | N                                            | 0                                      | N                                   |
| CD27-AS1      | 0.67850642                             | N                                            | 0                                      | N                                   |
| IFT57         | 0.67850642                             | N                                            | 1                                      | N                                   |
| LGR5          | 0.67850642                             | N                                            | 22                                     | N                                   |
| AC005042.1    | 0.678645246                            | N                                            | 0                                      | N                                   |
| DSTYK         | 0.678645246                            | N                                            | 0                                      | N                                   |
| LINC00654     | 0.678645246                            | N                                            | 0                                      | N                                   |
| LINC00917     | 0.678645246                            | N                                            | 0                                      | N                                   |
| LINC02260     | 0.678645246                            | N                                            | 0                                      | N                                   |
| PPP3CC        | 0.678645246                            | N                                            | 0                                      | N                                   |
| SH3BP2        | 0.678645246                            | N                                            | 0                                      | N                                   |
| TMPRSS11A     | 0.678645246                            | N                                            | 0                                      | N                                   |
| AC136944.2    | 0.67883921                             | N                                            | 0                                      | N                                   |
| MPPED2        | 0.678937296                            | N                                            | 0                                      | N                                   |
| SSX2IP        | 0.679086543                            | N                                            | 1                                      | N                                   |
| GTF2IRD2      | 0.679166847                            | N                                            | 0                                      | N                                   |
| IL1RL2        | 0.679166847                            | N                                            | 0                                      | N                                   |
| NDUFB10       | 0.679166847                            | N                                            | 2                                      | N                                   |
| S100A3        | 0.679166847                            | N                                            | 0                                      | N                                   |
| TBC1D16       | 0.679166847                            | N                                            | 0                                      | N                                   |
| TBC1D8        | 0.679166847                            | N                                            | 0                                      | N                                   |
| ZC3H8         | 0.679166847                            | N                                            | 0                                      | N                                   |
| ZC3HAV1       | 0.679166847                            | N                                            | 0                                      | N                                   |
| PITPNB        | 0.679240989                            | N                                            | 0                                      | N                                   |
| DNAJC4        | 0.679246849                            | N                                            | 1                                      | N                                   |
| PARP16        | 0.679246849                            | N                                            | 0                                      | N                                   |
| AC087473.1    | 0.679248079                            | N                                            | 0                                      | N                                   |
| MAP3K5        | 0.679248079                            | N                                            | 28                                     | N                                   |
| AC005702.3    | 0.679266484                            | N                                            | 0                                      | N                                   |
| AC084824.3    | 0.679266484                            | N                                            | 0                                      | N                                   |
| AC090241.3    | 0.679266484                            | N                                            | 0                                      | N                                   |
| AC105137.3    | 0.679266484                            | N                                            | 0                                      | N                                   |
| AL079303.2    | 0.679266484                            | N                                            | 0                                      | N                                   |
| AL121823.1    | 0.679266484                            | N                                            | 0                                      | N                                   |
| AL359504.1    | 0.679266484                            | N                                            | 0                                      | N                                   |
| ANKRD12       | 0.679266484                            | N                                            | 0                                      | N                                   |
| AP000776.1    | 0.679266484                            | N                                            | 0                                      | N                                   |
| ARGLU1        | 0.679266484                            | N                                            | 0                                      | N                                   |
| CSF1R         | 0.679266484                            | N                                            | 21                                     | N                                   |
| DOK5          | 0.679266484                            | N                                            | 7                                      | N                                   |
| EPS15P1       | 0.679266484                            | N                                            | 0                                      | N                                   |
| FOXJ1         | 0.679266484                            | N                                            | 3                                      | N                                   |
| GSTM1         | 0.679266484                            | N                                            | 20                                     | N                                   |
| KARSP1        | 0.679266484                            | N                                            | 0                                      | N                                   |
| LINC02418     | 0.679266484                            | N                                            | 0                                      | N                                   |
| LRP1          | 0.679266484                            | N                                            | 71                                     | N                                   |
| MAGEE1        | 0.679266484                            | N                                            | 0                                      | N                                   |
| MIR497HG      | 0.679266484                            | N                                            | 0                                      | N                                   |
| MMP25-AS1     | 0.679266484                            | N                                            | 0                                      | N                                   |
| P4HB          | 0.679266484                            | N                                            | 2                                      | N                                   |
| PFDN6         | 0.679266484                            | N                                            | 1                                      | N                                   |
| PKD1P6-NPIPP1 | 0.679266484                            | N                                            | 0                                      | N                                   |
| PWRN2         | 0.679266484                            | N                                            | 0                                      | N                                   |
| R3HCC1L       | 0.679266484                            | N                                            | 0                                      | N                                   |
| SLC9A3R2      | 0.679266484                            | N                                            | 0                                      | N                                   |
| SRRM5         | 0.679266484                            | N                                            | 0                                      | N                                   |
| STAT6         | 0.679266484                            | N                                            | 107                                    | Y                                   |
| STBD1         | 0.679266484                            | N                                            | 1                                      | N                                   |
| TADA2A        | 0.679266484                            | N                                            | 0                                      | N                                   |

| Gene symbols | FDR (differential expression analysis) | Differentially expressed gene? Y, Yes; N, No | Number of insulin related publications | Insulin related gene? Y, Yes; N, No |
|--------------|----------------------------------------|----------------------------------------------|----------------------------------------|-------------------------------------|
| TLCD1        | 0.679266484                            | N                                            | 0                                      | N                                   |
| TMEM37       | 0.679266484                            | N                                            | 1                                      | N                                   |
| TNS4         | 0.679266484                            | N                                            | 0                                      | N                                   |
| TRIM55       | 0.679266484                            | N                                            | 1                                      | N                                   |
| ZDHHC24      | 0.679266484                            | N                                            | 0                                      | N                                   |
| AL080317.2   | 0.679342554                            | N                                            | 0                                      | N                                   |
| NPAS1        | 0.679484629                            | N                                            | 1                                      | N                                   |
| IFRD1        | 0.679495699                            | N                                            | 2                                      | N                                   |
| AC073052.1   | 0.679505381                            | N                                            | 0                                      | N                                   |
| NAP1L5       | 0.67954089                             | N                                            | 0                                      | N                                   |
| SACM1L       | 0.67954089                             | N                                            | 0                                      | N                                   |
| ZNF594       | 0.67954089                             | N                                            | 0                                      | N                                   |
| AC005520.2   | 0.679680515                            | N                                            | 0                                      | N                                   |
| AP2A1        | 0.679680515                            | N                                            | 2                                      | N                                   |
| CTDSPL       | 0.679680515                            | N                                            | 0                                      | N                                   |
| FLRT3        | 0.679680515                            | N                                            | 2                                      | N                                   |
| N4BP3        | 0.679680515                            | N                                            | 1                                      | N                                   |
| AC106865.1   | 0.679781131                            | N                                            | 0                                      | N                                   |
| CREB3        | 0.679781131                            | N                                            | 2                                      | N                                   |
| MRPL45P1     | 0.679781131                            | N                                            | 0                                      | N                                   |
| LRRFIP1      | 0.679781412                            | N                                            | 1                                      | N                                   |
| SCOC-AS1     | 0.679988301                            | N                                            | 0                                      | N                                   |
| AL136164.2   | 0.680240023                            | N                                            | 0                                      | N                                   |
| LSAMP        | 0.680240023                            | N                                            | 0                                      | N                                   |
| MINCR        | 0.680240023                            | N                                            | 0                                      | N                                   |
| DMPK         | 0.680255947                            | N                                            | 76                                     | N                                   |
| AC025580.1   | 0.680311748                            | N                                            | 0                                      | N                                   |
| PRDX5        | 0.680311748                            | N                                            | 7                                      | N                                   |
| SHPRH        | 0.680311748                            | N                                            | 1                                      | N                                   |
| ZNF628       | 0.680311748                            | N                                            | 0                                      | N                                   |
| PCGF3        | 0.680364218                            | N                                            | 0                                      | N                                   |
| MSL3P1       | 0.680392934                            | N                                            | 0                                      | N                                   |
| TMEM126A     | 0.680392934                            | N                                            | 0                                      | N                                   |
| CGGBP1       | 0.680675833                            | N                                            | 0                                      | N                                   |
| IQCJ-SCHIP1  | 0.680675833                            | N                                            | 0                                      | N                                   |
| BCAS1        | 0.680746182                            | N                                            | 1                                      | N                                   |
| POU3F2       | 0.680746182                            | N                                            | 0                                      | N                                   |
| HNRNPA1      | 0.680861743                            | N                                            | 4                                      | N                                   |
| C17orf82     | 0.681097372                            | N                                            | 0                                      | N                                   |
| GPSM3        | 0.681097372                            | N                                            | 0                                      | N                                   |
| SLC22A25     | 0.681097372                            | N                                            | 0                                      | N                                   |
| SLC4A1       | 0.681097372                            | N                                            | 1                                      | N                                   |
| EPS8L1       | 0.681620541                            | N                                            | 0                                      | N                                   |
| UBR4         | 0.681620541                            | N                                            | 0                                      | N                                   |
| FBXO41       | 0.681777576                            | N                                            | 0                                      | N                                   |
| ZNF112       | 0.681777576                            | N                                            | 0                                      | N                                   |
| KIR3DX1      | 0.681782539                            | N                                            | 0                                      | N                                   |
| AC006518.2   | 0.681905645                            | N                                            | 0                                      | N                                   |
| AC092168.2   | 0.681905645                            | N                                            | 0                                      | N                                   |
| AL020996.1   | 0.681905645                            | N                                            | 0                                      | N                                   |
| CREG1        | 0.681905645                            | N                                            | 10                                     | N                                   |
| FLJ46284     | 0.681905645                            | N                                            | 0                                      | N                                   |
| KIAA1024L    | 0.681905645                            | N                                            | 0                                      | N                                   |
| LINC01481    | 0.681905645                            | N                                            | 0                                      | N                                   |
| RANP6        | 0.681905645                            | N                                            | 0                                      | N                                   |
| TEX9         | 0.6821169                              | N                                            | 0                                      | N                                   |
| AC010271.2   | 0.682253604                            | N                                            | 0                                      | N                                   |
| BAZ2A        | 0.682488944                            | N                                            | 0                                      | N                                   |
| LETM1P2      | 0.682488944                            | N                                            | 0                                      | N                                   |
| NOP16        | 0.682488944                            | N                                            | 0                                      | N                                   |
| NAAA         | 0.682510098                            | N                                            | 1                                      | N                                   |
| KBTBD8       | 0.682720211                            | N                                            | 0                                      | N                                   |
| SGPL1        | 0.682720211                            | N                                            | 0                                      | N                                   |
| SH2D2A       | 0.682720211                            | N                                            | 1                                      | N                                   |
| DANCR        | 0.682758243                            | N                                            | 2                                      | N                                   |
| TVP23CP2     | 0.682758243                            | N                                            | 0                                      | N                                   |

| Gene symbols | FDR (differential expression analysis) | Differentially expressed gene? Y, Yes; N, No | Number of insulin related publications | Insulin related gene? Y, Yes; N, No |
|--------------|----------------------------------------|----------------------------------------------|----------------------------------------|-------------------------------------|
| CCDC32       | 0.682798248                            | N                                            | 0                                      | N                                   |
| RNFT2        | 0.682798248                            | N                                            | 0                                      | N                                   |
| SNAI3-AS1    | 0.682807913                            | N                                            | 0                                      | N                                   |
| ARNT2        | 0.682928266                            | N                                            | 0                                      | N                                   |
| NCBP1        | 0.682928266                            | N                                            | 0                                      | N                                   |
| CTNS         | 0.682997563                            | N                                            | 27                                     | N                                   |
| DCST1-AS1    | 0.683199375                            | N                                            | 0                                      | N                                   |
| CMYA5        | 0.683302218                            | N                                            | 0                                      | N                                   |
| DAAM1        | 0.683302218                            | N                                            | 0                                      | N                                   |
| YY1AP1       | 0.683302218                            | N                                            | 4                                      | N                                   |
| CEBPZ        | 0.683379646                            | N                                            | 0                                      | N                                   |
| RELN         | 0.683388274                            | N                                            | 2                                      | N                                   |
| AC020658.3   | 0.683532557                            | N                                            | 0                                      | N                                   |
| ZNF43        | 0.683532557                            | N                                            | 0                                      | N                                   |
| AC005776.2   | 0.683547983                            | N                                            | 0                                      | N                                   |
| EPHB4        | 0.683547983                            | N                                            | 9                                      | N                                   |
| HSPA8P8      | 0.683547983                            | N                                            | 0                                      | N                                   |
| SHC1P1       | 0.683547983                            | N                                            | 0                                      | N                                   |
| MSH6         | 0.683739809                            | N                                            | 5                                      | N                                   |
| ESRP2        | 0.683826917                            | N                                            | 0                                      | N                                   |
| FOXK2        | 0.683826917                            | N                                            | 1                                      | N                                   |
| SYT1         | 0.683826917                            | N                                            | 10                                     | N                                   |
| THEGL        | 0.683826917                            | N                                            | 0                                      | N                                   |
| WFDC3        | 0.683826917                            | N                                            | 0                                      | N                                   |
| AC010900.1   | 0.684007312                            | N                                            | 0                                      | N                                   |
| CCNY         | 0.684007312                            | N                                            | 6                                      | N                                   |
| AP000542.3   | 0.684229893                            | N                                            | 0                                      | N                                   |
| SLC1A1       | 0.68433806                             | N                                            | 9                                      | N                                   |
| RPS27AP16    | 0.68440955                             | N                                            | 0                                      | N                                   |
| ACSS1        | 0.684530348                            | N                                            | 3                                      | N                                   |
| AP002505.1   | 0.684530348                            | N                                            | 0                                      | N                                   |
| INPP4B       | 0.684591721                            | N                                            | 4                                      | N                                   |
| BSG          | 0.684599857                            | N                                            | 10                                     | N                                   |
| CSF3R        | 0.684599857                            | N                                            | 58                                     | N                                   |
| MINPP1       | 0.684599857                            | N                                            | 0                                      | N                                   |
| MME          | 0.684599857                            | N                                            | 12                                     | N                                   |
| PGPEP1       | 0.684599857                            | N                                            | 0                                      | N                                   |
| POC1B-GALNT4 | 0.684599857                            | N                                            | 0                                      | N                                   |
| TBX5-AS1     | 0.684599857                            | N                                            | 0                                      | N                                   |
| CHRM3        | 0.684619781                            | N                                            | 4                                      | N                                   |
| RGS22        | 0.684619781                            | N                                            | 0                                      | N                                   |
| AP3S1        | 0.684634588                            | N                                            | 1                                      | N                                   |
| CNR2         | 0.684634588                            | N                                            | 14                                     | N                                   |
| LRRC49       | 0.684634588                            | N                                            | 0                                      | N                                   |
| ZNF714       | 0.684634588                            | N                                            | 1                                      | N                                   |
| CD55         | 0.684804277                            | N                                            | 19                                     | N                                   |
| DCP1A        | 0.684804277                            | N                                            | 2                                      | N                                   |
| ETAA1        | 0.684804277                            | N                                            | 0                                      | N                                   |
| FDPS         | 0.684804277                            | N                                            | 10                                     | N                                   |
| SYT9         | 0.684804277                            | N                                            | 6                                      | N                                   |
| TSPAN12      | 0.684804277                            | N                                            | 0                                      | N                                   |
| GOLGA2P7     | 0.68495593                             | N                                            | 0                                      | N                                   |
| KLF17P1      | 0.68495593                             | N                                            | 0                                      | N                                   |
| MLPH         | 0.68495593                             | N                                            | 1                                      | N                                   |
| RGS9         | 0.68495593                             | N                                            | 1                                      | N                                   |
| YIF1A        | 0.68495593                             | N                                            | 0                                      | N                                   |
| AL132780.2   | 0.685287136                            | N                                            | 0                                      | N                                   |
| AC023818.2   | 0.685303004                            | N                                            | 0                                      | N                                   |
| AL033519.2   | 0.685303004                            | N                                            | 0                                      | N                                   |
| FAM171B      | 0.685303004                            | N                                            | 0                                      | N                                   |
| RCC2P7       | 0.685303004                            | N                                            | 0                                      | N                                   |
| EIF2B4       | 0.68546535                             | N                                            | 0                                      | N                                   |
| RPL39P5      | 0.68546535                             | N                                            | 0                                      | N                                   |
| ADORA2A      | 0.685496538                            | N                                            | 7                                      | N                                   |
| ASPA         | 0.685496538                            | N                                            | 1                                      | N                                   |
| KCNMA1       | 0.685496538                            | N                                            | 6                                      | N                                   |

| Gene symbols | FDR (differential expression analysis) | Differentially expressed gene? Y, Yes; N, No | Number of insulin related publications | Insulin related gene? Y, Yes; N, No |
|--------------|----------------------------------------|----------------------------------------------|----------------------------------------|-------------------------------------|
| KLF17P2      | 0.685496538                            | N                                            | 0                                      | N                                   |
| PA2G4P4      | 0.685496538                            | N                                            | 0                                      | N                                   |
| HAPLN3       | 0.685792338                            | N                                            | 0                                      | N                                   |
| B2M          | 0.68579241                             | N                                            | 21                                     | N                                   |
| USP50        | 0.686022355                            | N                                            | 0                                      | N                                   |
| PAXBP1       | 0.68610726                             | N                                            | 0                                      | N                                   |
| AL590762.1   | 0.686109323                            | N                                            | 0                                      | N                                   |
| ANGPT2       | 0.686109323                            | N                                            | 23                                     | N                                   |
| ATP5A1P3     | 0.686109323                            | N                                            | 0                                      | N                                   |
| CYB561D2     | 0.686109323                            | N                                            | 0                                      | N                                   |
| DNAJC3-AS1   | 0.686109323                            | N                                            | 0                                      | N                                   |
| EIF4A1P2     | 0.686109323                            | N                                            | 0                                      | N                                   |
| FAM122C      | 0.686109323                            | N                                            | 0                                      | N                                   |
| GPCPD1       | 0.686109323                            | N                                            | 0                                      | N                                   |
| GSTO3P       | 0.686109323                            | N                                            | 0                                      | N                                   |
| KCTD9        | 0.686109323                            | N                                            | 0                                      | N                                   |
| NEUROD4      | 0.686109323                            | N                                            | 0                                      | N                                   |
| NRARP        | 0.686109323                            | N                                            | 0                                      | N                                   |
| NRAS         | 0.686109323                            | N                                            | 25                                     | N                                   |
| PCDHGC5      | 0.686109323                            | N                                            | 0                                      | N                                   |
| SLC24A1      | 0.686109323                            | N                                            | 0                                      | N                                   |
| TRAF3        | 0.686109323                            | N                                            | 9                                      | N                                   |
| ZNF724       | 0.686109323                            | N                                            | 0                                      | N                                   |
| HOXA2        | 0.68612294                             | N                                            | 3                                      | N                                   |
| C8orf4       | 0.686353608                            | N                                            | 0                                      | N                                   |
| LINC01949    | 0.686353608                            | N                                            | 0                                      | N                                   |
| AC090409.2   | 0.686381455                            | N                                            | 0                                      | N                                   |
| ANAPC4       | 0.686381455                            | N                                            | 0                                      | N                                   |
| OCRL         | 0.686381455                            | N                                            | 7                                      | N                                   |
| AC104662.2   | 0.686388845                            | N                                            | 0                                      | N                                   |
| AL365277.1   | 0.686399487                            | N                                            | 0                                      | N                                   |
| LAP3P2       | 0.686399487                            | N                                            | 0                                      | N                                   |
| VASN         | 0.686399487                            | N                                            | 0                                      | N                                   |
| TECR         | 0.686412711                            | N                                            | 0                                      | N                                   |
| H1FX         | 0.686502036                            | N                                            | 0                                      | N                                   |
| AL139095.1   | 0.686607059                            | N                                            | 0                                      | N                                   |
| AP003084.1   | 0.686607059                            | N                                            | 0                                      | N                                   |
| RCN1P2       | 0.686607059                            | N                                            | 0                                      | N                                   |
| SH2B2        | 0.686727663                            | N                                            | 29                                     | N                                   |
| CASP8AP2     | 0.686807831                            | N                                            | 0                                      | N                                   |
| GMEB2        | 0.686849841                            | N                                            | 0                                      | N                                   |
| AL139805.2   | 0.686852557                            | N                                            | 0                                      | N                                   |
| AC027031.2   | 0.686992787                            | N                                            | 0                                      | N                                   |
| AC063943.2   | 0.686992787                            | N                                            | 0                                      | N                                   |
| AL359504.2   | 0.686992787                            | N                                            | 0                                      | N                                   |
| DAD1         | 0.686992787                            | N                                            | 4                                      | N                                   |
| EXOSC4       | 0.686992787                            | N                                            | 0                                      | N                                   |
| GCSHP5       | 0.686992787                            | N                                            | 0                                      | N                                   |
| KCNE4        | 0.686992787                            | N                                            | 0                                      | N                                   |
| MTHFD2P7     | 0.686992787                            | N                                            | 0                                      | N                                   |
| RBM34        | 0.686992787                            | N                                            | 0                                      | N                                   |
| SFSWAP       | 0.686992787                            | N                                            | 0                                      | N                                   |
| SYNCRIP      | 0.686992787                            | N                                            | 2                                      | N                                   |
| AC131206.1   | 0.687014007                            | N                                            | 0                                      | N                                   |
| AC007603.1   | 0.687102227                            | N                                            | 0                                      | N                                   |
| AC080080.1   | 0.687102227                            | N                                            | 0                                      | N                                   |
| AP005058.1   | 0.687245593                            | N                                            | 0                                      | N                                   |
| TMCC3        | 0.687245593                            | N                                            | 0                                      | N                                   |
| AC063949.1   | 0.687280126                            | N                                            | 0                                      | N                                   |
| AC126544.2   | 0.687280126                            | N                                            | 0                                      | N                                   |
| AL049870.1   | 0.687280126                            | N                                            | 0                                      | N                                   |
| DNAH1        | 0.687280126                            | N                                            | 0                                      | N                                   |
| NUBPL        | 0.687280126                            | N                                            | 0                                      | N                                   |
| RPS7P1       | 0.687280126                            | N                                            | 0                                      | N                                   |
| STAU2-AS1    | 0.687280126                            | N                                            | 0                                      | N                                   |
| CHKA         | 0.687355446                            | N                                            | 4                                      | N                                   |

| Gene symbols | FDR (differential expression analysis) | Differentially expressed gene? Y, Yes; N, No | Number of insulin related publications | Insulin related gene? Y, Yes; N, No |
|--------------|----------------------------------------|----------------------------------------------|----------------------------------------|-------------------------------------|
| ZNF33BP1     | 0.687355446                            | N                                            | 0                                      | N                                   |
| SLC7A5       | 0.687449019                            | N                                            | 23                                     | N                                   |
| uc_338       | 0.687551865                            | N                                            | 0                                      | N                                   |
| MIR583HG     | 0.687700721                            | N                                            | 0                                      | N                                   |
| MTRNR2L12    | 0.687838198                            | N                                            | 0                                      | N                                   |
| AL050341.2   | 0.687868549                            | N                                            | 0                                      | N                                   |
| DLG4         | 0.688176918                            | N                                            | 23                                     | N                                   |
| ADGRB3       | 0.688247984                            | N                                            | 1                                      | N                                   |
| TCEAL7       | 0.688247984                            | N                                            | 1                                      | N                                   |
| HILPDA       | 0.688261087                            | N                                            | 0                                      | N                                   |
| AC008915.2   | 0.688278933                            | N                                            | 0                                      | N                                   |
| AC010210.1   | 0.688345985                            | N                                            | 0                                      | N                                   |
| AL356986.1   | 0.688345985                            | N                                            | 0                                      | N                                   |
| AL359878.1   | 0.688345985                            | N                                            | 0                                      | N                                   |
| FLII         | 0.688345985                            | N                                            | 29                                     | N                                   |
| FYB2         | 0.688345985                            | N                                            | 0                                      | N                                   |
| HECTD3       | 0.688345985                            | N                                            | 0                                      | N                                   |
| LINC00475    | 0.688345985                            | N                                            | 0                                      | N                                   |
| MROH8        | 0.688345985                            | N                                            | 0                                      | N                                   |
| RPS4XP3      | 0.688345985                            | N                                            | 0                                      | N                                   |
| SPACA6P-AS   | 0.688345985                            | N                                            | 0                                      | N                                   |
| TNFSF15      | 0.688345985                            | N                                            | 3                                      | N                                   |
| Z99756.1     | 0.688345985                            | N                                            | 0                                      | N                                   |
| ZNF440       | 0.688345985                            | N                                            | 0                                      | N                                   |
| ZNF620       | 0.688345985                            | N                                            | 0                                      | N                                   |
| AC132938.5   | 0.688578473                            | N                                            | 0                                      | N                                   |
| FBXO7        | 0.688578473                            | N                                            | 0                                      | N                                   |
| CAMSAP1      | 0.68871551                             | N                                            | 0                                      | N                                   |
| CARD19       | 0.68871551                             | N                                            | 0                                      | N                                   |
| CLN6         | 0.68871551                             | N                                            | 1                                      | N                                   |
| DUS2         | 0.68871551                             | N                                            | 0                                      | N                                   |
| FLT3LG       | 0.68871551                             | N                                            | 0                                      | N                                   |
| GSKIP        | 0.68871551                             | N                                            | 1                                      | N                                   |
| HSBP1        | 0.68871551                             | N                                            | 5                                      | N                                   |
| LCK          | 0.68871551                             | N                                            | 33                                     | N                                   |
| MRPS18AP1    | 0.68871551                             | N                                            | 0                                      | N                                   |
| NAA16        | 0.68871551                             | N                                            | 0                                      | N                                   |
| NIPSNAP3B    | 0.68871551                             | N                                            | 0                                      | N                                   |
| PCSK6        | 0.68871551                             | N                                            | 8                                      | N                                   |
| PSMA3-AS1    | 0.68871551                             | N                                            | 0                                      | N                                   |
| RPL32P34     | 0.68871551                             | N                                            | 0                                      | N                                   |
| SERTAD2      | 0.68871551                             | N                                            | 1                                      | N                                   |
| USF1         | 0.68871551                             | N                                            | 46                                     | N                                   |
| P2RY1        | 0.688773118                            | N                                            | 13                                     | N                                   |
| SLC9A5       | 0.688773118                            | N                                            | 0                                      | N                                   |
| AC004890.2   | 0.688856846                            | N                                            | 0                                      | N                                   |
| C2CD4C       | 0.688856846                            | N                                            | 1                                      | N                                   |
| CCDC71L      | 0.688856846                            | N                                            | 0                                      | N                                   |
| DNAJC10      | 0.688856846                            | N                                            | 2                                      | N                                   |
| FKBP2        | 0.688856846                            | N                                            | 1                                      | N                                   |
| ITGBL1       | 0.688856846                            | N                                            | 0                                      | N                                   |
| PLD2         | 0.688856846                            | N                                            | 17                                     | N                                   |
| SIKE1        | 0.688856846                            | N                                            | 0                                      | N                                   |
| RPGR         | 0.689000835                            | N                                            | 0                                      | N                                   |
| AC004941.2   | 0.689162236                            | N                                            | 0                                      | N                                   |
| HMGCL        | 0.689162236                            | N                                            | 3                                      | N                                   |
| HSPB2        | 0.689162236                            | N                                            | 6                                      | N                                   |
| PYGO1        | 0.689162236                            | N                                            | 1                                      | N                                   |
| AC079384.1   | 0.689251271                            | N                                            | 0                                      | N                                   |
| GPR52        | 0.689251271                            | N                                            | 0                                      | N                                   |
| RNF213       | 0.689251271                            | N                                            | 2                                      | N                                   |
| STK24        | 0.689251271                            | N                                            | 4                                      | N                                   |
| TGOLN2       | 0.689251271                            | N                                            | 6                                      | N                                   |
| TTC1         | 0.689251271                            | N                                            | 0                                      | N                                   |
| RAB32        | 0.6893274                              | N                                            | 0                                      | N                                   |
| AC091180.3   | 0.689426044                            | N                                            | 0                                      | N                                   |



| Gene symbols | FDR (differential expression analysis) | Differentially expressed gene? Y, Yes; N, No | Number of insulin related publications | Insulin related gene? Y, Yes; N, No |
|--------------|----------------------------------------|----------------------------------------------|----------------------------------------|-------------------------------------|
| CCS          | 0.689426044                            | N                                            | 125                                    | Y                                   |
| ADGRD2       | 0.689468196                            | N                                            | 0                                      | N                                   |
| WDR83        | 0.689766676                            | N                                            | 0                                      | N                                   |
| GOSR1        | 0.689858281                            | N                                            | 0                                      | N                                   |
| RAB27B       | 0.689922232                            | N                                            | 3                                      | N                                   |
| XIAPP1       | 0.690034284                            | N                                            | 0                                      | N                                   |
| ZDHHC15      | 0.690114803                            | N                                            | 0                                      | N                                   |
| ZNF655       | 0.690114803                            | N                                            | 0                                      | N                                   |
| KDELC2       | 0.690152332                            | N                                            | 0                                      | N                                   |
| SERAC1       | 0.690310629                            | N                                            | 0                                      | N                                   |
| SNX24        | 0.690633961                            | N                                            | 0                                      | N                                   |
| NPTN-IT1     | 0.690650706                            | N                                            | 0                                      | N                                   |
| AL513283.1   | 0.690703016                            | N                                            | 0                                      | N                                   |
| CPSF2        | 0.690902219                            | N                                            | 0                                      | N                                   |
| CYP4F35P     | 0.690902219                            | N                                            | 0                                      | N                                   |
| RBM7         | 0.690902219                            | N                                            | 0                                      | N                                   |
| SNORA74A     | 0.690902219                            | N                                            | 0                                      | N                                   |
| TMEM186      | 0.690902219                            | N                                            | 0                                      | N                                   |
| TNKS2-AS1    | 0.690902219                            | N                                            | 0                                      | N                                   |
| ZNF767P      | 0.690902219                            | N                                            | 0                                      | N                                   |
| OR2D2        | 0.690969792                            | N                                            | 0                                      | N                                   |
| ADAMTS9      | 0.691026099                            | N                                            | 24                                     | N                                   |
| ICAM1        | 0.691026099                            | N                                            | 662                                    | Y                                   |
| RPS4X        | 0.691026099                            | N                                            | 0                                      | N                                   |
| USF1P1       | 0.691026099                            | N                                            | 0                                      | N                                   |
| CDK5RAP1     | 0.69116701                             | N                                            | 4                                      | N                                   |
| ERLEC1       | 0.69116701                             | N                                            | 0                                      | N                                   |
| VENTX        | 0.69116701                             | N                                            | 0                                      | N                                   |
| VIM          | 0.69116701                             | N                                            | 14                                     | N                                   |
| MDFI         | 0.691218627                            | N                                            | 0                                      | N                                   |
| ZNF316       | 0.691399758                            | N                                            | 0                                      | N                                   |
| ARL5B        | 0.6914002                              | N                                            | 0                                      | N                                   |
| ATE1-AS1     | 0.6914002                              | N                                            | 0                                      | N                                   |
| LAMA1        | 0.691422666                            | N                                            | 2                                      | N                                   |
| AC104162.1   | 0.691709086                            | N                                            | 0                                      | N                                   |
| HIF1AN       | 0.691709086                            | N                                            | 3                                      | N                                   |
| AC012309.1   | 0.691762101                            | N                                            | 0                                      | N                                   |
| TNFSF13      | 0.691762101                            | N                                            | 3                                      | N                                   |
| AC007919.1   | 0.691787351                            | N                                            | 0                                      | N                                   |
| ALKBH4       | 0.691787351                            | N                                            | 0                                      | N                                   |
| Z82209.1     | 0.691787351                            | N                                            | 0                                      | N                                   |
| AC009403.1   | 0.691816158                            | N                                            | 0                                      | N                                   |
| AC092952.1   | 0.691816158                            | N                                            | 0                                      | N                                   |
| AC098820.3   | 0.691816158                            | N                                            | 0                                      | N                                   |
| AC125612.1   | 0.691816158                            | N                                            | 0                                      | N                                   |
| CCZ1         | 0.691816158                            | N                                            | 0                                      | N                                   |
| LINC01397    | 0.691816158                            | N                                            | 0                                      | N                                   |
| WDR36        | 0.691816158                            | N                                            | 0                                      | N                                   |
| GPR1-AS      | 0.691946867                            | N                                            | 0                                      | N                                   |
| ALS2CL       | 0.692126414                            | N                                            | 0                                      | N                                   |
| C10orf67     | 0.692126414                            | N                                            | 0                                      | N                                   |
| ZGPAT        | 0.692126414                            | N                                            | 0                                      | N                                   |
| ZNF384       | 0.692126414                            | N                                            | 0                                      | N                                   |
| ANKUB1       | 0.692230102                            | N                                            | 0                                      | N                                   |
| CDC42-IT1    | 0.692230102                            | N                                            | 0                                      | N                                   |
| CDH23        | 0.692230102                            | N                                            | 1                                      | N                                   |
| HEBP1        | 0.692230102                            | N                                            | 2                                      | N                                   |
| HNRNPCP2     | 0.692230102                            | N                                            | 0                                      | N                                   |
| MFAP1        | 0.692230102                            | N                                            | 0                                      | N                                   |
| NCLP1        | 0.692230102                            | N                                            | 0                                      | N                                   |
| RHBDF1       | 0.692230102                            | N                                            | 0                                      | N                                   |
| SCN2A        | 0.692230102                            | N                                            | 4                                      | N                                   |
| BMS1P19      | 0.692288837                            | N                                            | 0                                      | N                                   |
| CDK7         | 0.692288837                            | N                                            | 2                                      | N                                   |
| LARS2        | 0.692288837                            | N                                            | 0                                      | N                                   |
| MMP24        | 0.692288837                            | N                                            | 0                                      | N                                   |

| Gene symbols | FDR (differential expression analysis) | Differentially expressed gene? Y, Yes; N, No | Number of insulin related publications | Insulin related gene? Y, Yes; N, No |
|--------------|----------------------------------------|----------------------------------------------|----------------------------------------|-------------------------------------|
| C16orf87     | 0.692293414                            | N                                            | 0                                      | N                                   |
| URB2         | 0.692293414                            | N                                            | 1                                      | N                                   |
| MYOCD        | 0.69235344                             | N                                            | 5                                      | N                                   |
| AL358394.2   | 0.692386416                            | N                                            | 0                                      | N                                   |
| AL606834.2   | 0.692386416                            | N                                            | 0                                      | N                                   |
| NTHL1        | 0.692386416                            | N                                            | 3                                      | N                                   |
| RITA1        | 0.692386416                            | N                                            | 0                                      | N                                   |
| ZNF354B      | 0.692386416                            | N                                            | 0                                      | N                                   |
| ZNF473       | 0.692386416                            | N                                            | 0                                      | N                                   |
| SAFB2        | 0.69245802                             | N                                            | 0                                      | N                                   |
| LINC01759    | 0.692539873                            | N                                            | 0                                      | N                                   |
| AC008494.3   | 0.692667462                            | N                                            | 0                                      | N                                   |
| AC026367.2   | 0.692667462                            | N                                            | 0                                      | N                                   |
| SCAMP5       | 0.692667462                            | N                                            | 0                                      | N                                   |
| STMN3        | 0.692667462                            | N                                            | 0                                      | N                                   |
| AC097372.4   | 0.692681779                            | N                                            | 0                                      | N                                   |
| BCAR3        | 0.692681779                            | N                                            | 4                                      | N                                   |
| AL157786.1   | 0.692684121                            | N                                            | 0                                      | N                                   |
| AL355377.1   | 0.692684121                            | N                                            | 0                                      | N                                   |
| MCMBP        | 0.692684121                            | N                                            | 0                                      | N                                   |
| PPP4R4       | 0.692684121                            | N                                            | 0                                      | N                                   |
| TMEM70       | 0.692684121                            | N                                            | 0                                      | N                                   |
| AC087623.3   | 0.692839433                            | N                                            | 0                                      | N                                   |
| LINC01772    | 0.692839433                            | N                                            | 0                                      | N                                   |
| MKRN1        | 0.692839433                            | N                                            | 1                                      | N                                   |
| PRDX3P1      | 0.692839433                            | N                                            | 0                                      | N                                   |
| PRORS1P      | 0.692839433                            | N                                            | 0                                      | N                                   |
| SEMA4A       | 0.692839433                            | N                                            | 1                                      | N                                   |
| TMEM183A     | 0.692839433                            | N                                            | 0                                      | N                                   |
| CBWD1        | 0.692935479                            | N                                            | 0                                      | N                                   |
| CTSD         | 0.692935479                            | N                                            | 15                                     | N                                   |
| ZNF749       | 0.692935479                            | N                                            | 0                                      | N                                   |
| CBX3P9       | 0.692951845                            | N                                            | 0                                      | N                                   |
| RAB2B        | 0.692978912                            | N                                            | 0                                      | N                                   |
| FLJ12825     | 0.693129587                            | N                                            | 0                                      | N                                   |
| CA8          | 0.693152728                            | N                                            | 0                                      | N                                   |
| PFAS         | 0.693173221                            | N                                            | 14                                     | N                                   |
| ERBB4        | 0.693376547                            | N                                            | 42                                     | N                                   |
| NTN5         | 0.693514131                            | N                                            | 0                                      | N                                   |
| ZNF710-AS1   | 0.693596695                            | N                                            | 0                                      | N                                   |
| AC002519.1   | 0.693603125                            | N                                            | 0                                      | N                                   |
| AC010997.6   | 0.693603125                            | N                                            | 0                                      | N                                   |
| AC012569.1   | 0.693603125                            | N                                            | 0                                      | N                                   |
| AC055811.3   | 0.693603125                            | N                                            | 0                                      | N                                   |
| AL022400.1   | 0.693603125                            | N                                            | 0                                      | N                                   |
| ALG6         | 0.693603125                            | N                                            | 0                                      | N                                   |
| AP000915.2   | 0.693603125                            | N                                            | 0                                      | N                                   |
| AP003170.4   | 0.693603125                            | N                                            | 0                                      | N                                   |
| C1orf35      | 0.693603125                            | N                                            | 0                                      | N                                   |
| CBX2         | 0.693603125                            | N                                            | 1                                      | N                                   |
| CSDC2        | 0.693603125                            | N                                            | 1                                      | N                                   |
| DNM1         | 0.693603125                            | N                                            | 0                                      | N                                   |
| HLA-DPA1     | 0.693603125                            | N                                            | 3                                      | N                                   |
| LINC00887    | 0.693603125                            | N                                            | 0                                      | N                                   |
| LINC01444    | 0.693603125                            | N                                            | 0                                      | N                                   |
| SPATA20      | 0.693603125                            | N                                            | 0                                      | N                                   |
| ZFP69B       | 0.693603125                            | N                                            | 0                                      | N                                   |
| MEMO1        | 0.693612757                            | N                                            | 2                                      | N                                   |
| AL132709.8   | 0.693801585                            | N                                            | 0                                      | N                                   |
| BCL11A       | 0.693801585                            | N                                            | 14                                     | N                                   |
| AC023043.2   | 0.693869153                            | N                                            | 0                                      | N                                   |
| IFT81        | 0.694010045                            | N                                            | 0                                      | N                                   |
| RNF182       | 0.694108641                            | N                                            | 0                                      | N                                   |
| AL645568.2   | 0.694144926                            | N                                            | 0                                      | N                                   |
| AC005785.2   | 0.69416762                             | N                                            | 0                                      | N                                   |
| ASTN2        | 0.69416762                             | N                                            | 0                                      | N                                   |

| Gene symbols  | FDR (differential expression analysis) | Differentially expressed gene? Y, Yes; N, No | Number of insulin related publications | Insulin related gene? Y, Yes; N, No |
|---------------|----------------------------------------|----------------------------------------------|----------------------------------------|-------------------------------------|
| KAZALD1       | 0.69416762                             | N                                            | 5                                      | N                                   |
| LINC00967     | 0.69416762                             | N                                            | 0                                      | N                                   |
| NAXE          | 0.69416762                             | N                                            | 0                                      | N                                   |
| NDUFAF3       | 0.69416762                             | N                                            | 0                                      | N                                   |
| LINC01447     | 0.694239798                            | N                                            | 0                                      | N                                   |
| RP11-407N17.3 | 0.694239798                            | N                                            | 0                                      | N                                   |
| SUN1          | 0.694239798                            | N                                            | 2                                      | N                                   |
| HIST3H2A      | 0.694292906                            | N                                            | 0                                      | N                                   |
| AC012349.1    | 0.694349031                            | N                                            | 0                                      | N                                   |
| CBL           | 0.694349031                            | N                                            | 165                                    | Y                                   |
| EEF1GP1       | 0.694349031                            | N                                            | 0                                      | N                                   |
| KIAA0232      | 0.694349031                            | N                                            | 1                                      | N                                   |
| KIAA1683      | 0.694349031                            | N                                            | 0                                      | N                                   |
| SLITRK4       | 0.694349031                            | N                                            | 0                                      | N                                   |
| TMEM151B      | 0.694349031                            | N                                            | 0                                      | N                                   |
| AC005034.3    | 0.694675049                            | N                                            | 0                                      | N                                   |
| AC093503.3    | 0.694675049                            | N                                            | 0                                      | N                                   |
| DDHD2         | 0.694675049                            | N                                            | 0                                      | N                                   |
| FAM71F1       | 0.694675049                            | N                                            | 0                                      | N                                   |
| PCDHGA12      | 0.694675049                            | N                                            | 0                                      | N                                   |
| SNURF         | 0.694675049                            | N                                            | 6                                      | N                                   |
| THTPA         | 0.694695192                            | N                                            | 0                                      | N                                   |
| KHSRPP1       | 0.694882787                            | N                                            | 0                                      | N                                   |
| EHD2          | 0.694895526                            | N                                            | 7                                      | N                                   |
| FHP1          | 0.694926751                            | N                                            | 0                                      | N                                   |
| AL391069.2    | 0.695034345                            | N                                            | 0                                      | N                                   |
| C4orf47       | 0.695177188                            | N                                            | 0                                      | N                                   |
| AP003680.1    | 0.695255966                            | N                                            | 0                                      | N                                   |
| AKR1B10P1     | 0.695264358                            | N                                            | 0                                      | N                                   |
| KLK2          | 0.695264358                            | N                                            | 1                                      | N                                   |
| PCDH15        | 0.695264358                            | N                                            | 1                                      | N                                   |
| RPL13AP5      | 0.695264358                            | N                                            | 0                                      | N                                   |
| AC015909.5    | 0.695602686                            | N                                            | 0                                      | N                                   |
| CDK3          | 0.695602686                            | N                                            | 3                                      | N                                   |
| DNTTIP1       | 0.695602686                            | N                                            | 0                                      | N                                   |
| NCOA4P4       | 0.695602686                            | N                                            | 0                                      | N                                   |
| NPY6R         | 0.695602686                            | N                                            | 1                                      | N                                   |
| PLK2          | 0.695602686                            | N                                            | 2                                      | N                                   |
| PRSS36        | 0.695602686                            | N                                            | 0                                      | N                                   |
| SGF29         | 0.695602686                            | N                                            | 0                                      | N                                   |
| ZDHHC12       | 0.695602686                            | N                                            | 0                                      | N                                   |
| ZNF514        | 0.695602686                            | N                                            | 0                                      | N                                   |
| AL109918.2    | 0.695789483                            | N                                            | 0                                      | N                                   |
| B4GALT7       | 0.695789483                            | N                                            | 0                                      | N                                   |
| FHOD3         | 0.695789483                            | N                                            | 0                                      | N                                   |
| KIF5B         | 0.695789483                            | N                                            | 13                                     | N                                   |
| TSNARE1       | 0.695871305                            | N                                            | 0                                      | N                                   |
| AC008132.1    | 0.695906677                            | N                                            | 0                                      | N                                   |
| AC068870.3    | 0.695906677                            | N                                            | 0                                      | N                                   |
| AC234781.3    | 0.695906677                            | N                                            | 0                                      | N                                   |
| AL512504.1    | 0.695906677                            | N                                            | 0                                      | N                                   |
| ANKRD20A9P    | 0.695906677                            | N                                            | 0                                      | N                                   |
| ASXL1         | 0.695906677                            | N                                            | 1                                      | N                                   |
| CDK7P1        | 0.695906677                            | N                                            | 0                                      | N                                   |
| COBL          | 0.695906677                            | N                                            | 1                                      | N                                   |
| CPNE8         | 0.695906677                            | N                                            | 0                                      | N                                   |
| PRPF8         | 0.695906677                            | N                                            | 0                                      | N                                   |
| SNAP91        | 0.695906677                            | N                                            | 0                                      | N                                   |
| STK32B        | 0.695906677                            | N                                            | 0                                      | N                                   |
| STXBP4        | 0.695906677                            | N                                            | 10                                     | N                                   |
| TESMIN        | 0.695906677                            | N                                            | 0                                      | N                                   |
| USP27X-AS1    | 0.695906677                            | N                                            | 0                                      | N                                   |
| AC087286.4    | 0.695981431                            | N                                            | 0                                      | N                                   |
| C11orf1       | 0.695981431                            | N                                            | 0                                      | N                                   |
| C14orf2       | 0.695981431                            | N                                            | 0                                      | N                                   |
| HSDL2         | 0.695981431                            | N                                            | 0                                      | N                                   |

| Gene symbols   | FDR (differential expression analysis) | Differentially expressed gene? Y, Yes; N, No | Number of insulin related publications | Insulin related gene? Y, Yes; N, No |
|----------------|----------------------------------------|----------------------------------------------|----------------------------------------|-------------------------------------|
| TISP43         | 0.695981431                            | N                                            | 0                                      | N                                   |
| AC016026.1     | 0.696101722                            | N                                            | 0                                      | N                                   |
| GSDMB          | 0.696101722                            | N                                            | 1                                      | N                                   |
| PROM2          | 0.696101722                            | N                                            | 0                                      | N                                   |
| AC006213.4     | 0.696154926                            | N                                            | 0                                      | N                                   |
| SPHKAP         | 0.696206744                            | N                                            | 2                                      | N                                   |
| GPS2           | 0.696452485                            | N                                            | 4                                      | N                                   |
| RN7SL2         | 0.696452485                            | N                                            | 0                                      | N                                   |
| AC091516.1     | 0.696736075                            | N                                            | 0                                      | N                                   |
| MAP3K15        | 0.696737103                            | N                                            | 0                                      | N                                   |
| SPATA20P1      | 0.696778464                            | N                                            | 0                                      | N                                   |
| SNX15          | 0.696821362                            | N                                            | 1                                      | N                                   |
| PDZD2          | 0.696971592                            | N                                            | 5                                      | N                                   |
| PEX11A         | 0.697011134                            | N                                            | 1                                      | N                                   |
| DUS1L          | 0.697093439                            | N                                            | 0                                      | N                                   |
| HMGB1P19       | 0.697093439                            | N                                            | 0                                      | N                                   |
| TMEM42         | 0.697093439                            | N                                            | 0                                      | N                                   |
| PIK3C2G        | 0.6972342                              | N                                            | 4                                      | N                                   |
| AL451142.1     | 0.697261803                            | N                                            | 0                                      | N                                   |
| FAR1P1         | 0.697261803                            | N                                            | 0                                      | N                                   |
| CR382285.2     | 0.69732857                             | N                                            | 0                                      | N                                   |
| AL031283.1     | 0.697658226                            | N                                            | 0                                      | N                                   |
| PTAFR          | 0.697694018                            | N                                            | 1                                      | N                                   |
| NCOA2          | 0.697763714                            | N                                            | 6                                      | N                                   |
| CDKN1B         | 0.69798                                | N                                            | 78                                     | N                                   |
| AL390318.1     | 0.698160201                            | N                                            | 0                                      | N                                   |
| ERCC6-PGBD3    | 0.698160201                            | N                                            | 0                                      | N                                   |
| MRPL3          | 0.698160201                            | N                                            | 0                                      | N                                   |
| SLC30A4        | 0.698160201                            | N                                            | 2                                      | N                                   |
| DDX24          | 0.698262115                            | N                                            | 0                                      | N                                   |
| HMGCS1         | 0.698262115                            | N                                            | 11                                     | N                                   |
| NHLRC4         | 0.698262115                            | N                                            | 0                                      | N                                   |
| NIPAL3         | 0.698262115                            | N                                            | 0                                      | N                                   |
| TMA16          | 0.698262115                            | N                                            | 0                                      | N                                   |
| ZFYVE19        | 0.698262115                            | N                                            | 0                                      | N                                   |
| ZNF57          | 0.698262115                            | N                                            | 0                                      | N                                   |
| AC118553.1     | 0.698271762                            | N                                            | 0                                      | N                                   |
| C15orf38-AP3S2 | 0.698279957                            | N                                            | 0                                      | N                                   |
| CAPNS1         | 0.698279957                            | N                                            | 0                                      | N                                   |
| CARD6          | 0.698279957                            | N                                            | 1                                      | N                                   |
| LRRC37A9P      | 0.698279957                            | N                                            | 0                                      | N                                   |
| NUDT16L1       | 0.698279957                            | N                                            | 0                                      | N                                   |
| ANXA11         | 0.698296574                            | N                                            | 0                                      | N                                   |
| AC064847.1     | 0.698349247                            | N                                            | 0                                      | N                                   |
| AC007375.2     | 0.698364534                            | N                                            | 0                                      | N                                   |
| AC107075.1     | 0.698364534                            | N                                            | 0                                      | N                                   |
| CLIC4          | 0.698364534                            | N                                            | 2                                      | N                                   |
| DNAL1          | 0.698364534                            | N                                            | 0                                      | N                                   |
| GNGT2          | 0.698364534                            | N                                            | 1                                      | N                                   |
| KCNS2          | 0.698364534                            | N                                            | 0                                      | N                                   |
| RANBP3         | 0.698364534                            | N                                            | 0                                      | N                                   |
| AC097461.1     | 0.698538455                            | N                                            | 0                                      | N                                   |
| AL022324.2     | 0.698626437                            | N                                            | 0                                      | N                                   |
| PIP5K1A        | 0.698679518                            | N                                            | 0                                      | N                                   |
| MRPL43         | 0.698881527                            | N                                            | 0                                      | N                                   |
| MTND4P14       | 0.698881527                            | N                                            | 0                                      | N                                   |
| NSUN5P1        | 0.698881527                            | N                                            | 0                                      | N                                   |
| RGS7           | 0.699037943                            | N                                            | 1                                      | N                                   |
| TACC1          | 0.699037943                            | N                                            | 1                                      | N                                   |
| AAMDC          | 0.699043833                            | N                                            | 0                                      | N                                   |
| CASTOR1        | 0.699043833                            | N                                            | 1                                      | N                                   |
| ID4            | 0.699043833                            | N                                            | 7                                      | N                                   |
| LINC02071      | 0.699043833                            | N                                            | 0                                      | N                                   |
| MBTPS2         | 0.699043833                            | N                                            | 1                                      | N                                   |
| SIRT1          | 0.699043833                            | N                                            | 980                                    | Y                                   |
| ZNF592         | 0.699043833                            | N                                            | 0                                      | N                                   |

| Gene symbols | FDR (differential expression analysis) | Differentially expressed gene? Y, Yes; N, No | Number of insulin related publications | Insulin related gene? Y, Yes; N, No |
|--------------|----------------------------------------|----------------------------------------------|----------------------------------------|-------------------------------------|
| EIF4EP2      | 0.699125619                            | N                                            | 0                                      | N                                   |
| IFT22        | 0.699150285                            | N                                            | 0                                      | N                                   |
| CLCN5        | 0.699213176                            | N                                            | 1                                      | N                                   |
| AL133241.1   | 0.699474779                            | N                                            | 0                                      | N                                   |
| UBE2G1       | 0.699474779                            | N                                            | 1                                      | N                                   |
| AC006262.1   | 0.69956182                             | N                                            | 0                                      | N                                   |
| AC006463.1   | 0.69956182                             | N                                            | 0                                      | N                                   |
| SP8          | 0.69956182                             | N                                            | 2                                      | N                                   |
| PHB2         | 0.699578359                            | N                                            | 7                                      | N                                   |
| AC008124.1   | 0.69994161                             | N                                            | 0                                      | N                                   |
| MAGEH1       | 0.69994161                             | N                                            | 0                                      | N                                   |
| AC006299.1   | 0.700020372                            | N                                            | 0                                      | N                                   |
| SDR39U1      | 0.700300227                            | N                                            | 0                                      | N                                   |
| AL158211.5   | 0.700386021                            | N                                            | 0                                      | N                                   |
| AP000704.1   | 0.700501775                            | N                                            | 0                                      | N                                   |
| TBC1D3B      | 0.700501775                            | N                                            | 0                                      | N                                   |
| AC011890.1   | 0.7005211                              | N                                            | 0                                      | N                                   |
| AC012213.3   | 0.7005211                              | N                                            | 0                                      | N                                   |
| AC018992.1   | 0.7005211                              | N                                            | 0                                      | N                                   |
| AKAP9        | 0.7005211                              | N                                            | 1                                      | N                                   |
| DNAJB2       | 0.7005211                              | N                                            | 1                                      | N                                   |
| FAF2         | 0.7005211                              | N                                            | 0                                      | N                                   |
| FAM106A      | 0.7005211                              | N                                            | 0                                      | N                                   |
| G3BP2        | 0.7005211                              | N                                            | 0                                      | N                                   |
| LIG4         | 0.7005211                              | N                                            | 2                                      | N                                   |
| NKILA        | 0.7005211                              | N                                            | 0                                      | N                                   |
| SLC25A3P2    | 0.7005211                              | N                                            | 0                                      | N                                   |
| MLLT10       | 0.700572916                            | N                                            | 2                                      | N                                   |
| AC005702.1   | 0.700650765                            | N                                            | 0                                      | N                                   |
| GIPC2        | 0.700650765                            | N                                            | 3                                      | N                                   |
| UBA52P6      | 0.700650765                            | N                                            | 0                                      | N                                   |
| AC074397.1   | 0.700703743                            | N                                            | 0                                      | N                                   |
| AC083902.2   | 0.700703743                            | N                                            | 0                                      | N                                   |
| AC090740.1   | 0.700703743                            | N                                            | 0                                      | N                                   |
| AC145098.2   | 0.700703743                            | N                                            | 0                                      | N                                   |
| AL008628.1   | 0.700703743                            | N                                            | 0                                      | N                                   |
| AL031133.1   | 0.700703743                            | N                                            | 0                                      | N                                   |
| AP005264.8   | 0.700703743                            | N                                            | 0                                      | N                                   |
| C5orf24      | 0.700703743                            | N                                            | 0                                      | N                                   |
| CCDC69       | 0.700703743                            | N                                            | 0                                      | N                                   |
| CDK10        | 0.700703743                            | N                                            | 3                                      | N                                   |
| ERMN         | 0.700703743                            | N                                            | 0                                      | N                                   |
| EVI5         | 0.700703743                            | N                                            | 0                                      | N                                   |
| FAM168B      | 0.700703743                            | N                                            | 0                                      | N                                   |
| FGFR1        | 0.700703743                            | N                                            | 106                                    | Y                                   |
| IKZF1        | 0.700703743                            | N                                            | 2                                      | N                                   |
| MFF          | 0.700703743                            | N                                            | 6                                      | N                                   |
| NECTIN3-AS1  | 0.700703743                            | N                                            | 0                                      | N                                   |
| OGN          | 0.700703743                            | N                                            | 9                                      | N                                   |
| PNISR        | 0.700703743                            | N                                            | 0                                      | N                                   |
| RPLP2        | 0.700703743                            | N                                            | 0                                      | N                                   |
| SERF2        | 0.700703743                            | N                                            | 0                                      | N                                   |
| SLC2A1       | 0.700703743                            | N                                            | 649                                    | Y                                   |
| TMEM246      | 0.700703743                            | N                                            | 0                                      | N                                   |
| TRIOBP       | 0.700703743                            | N                                            | 1                                      | N                                   |
| ZNF133       | 0.700703743                            | N                                            | 0                                      | N                                   |
| MOCS1        | 0.700728778                            | N                                            | 0                                      | N                                   |
| PGGT1B       | 0.700728778                            | N                                            | 0                                      | N                                   |
| CCDC144B     | 0.70077425                             | N                                            | 0                                      | N                                   |
| TMEM51       | 0.700858681                            | N                                            | 1                                      | N                                   |
| AC023968.2   | 0.701143735                            | N                                            | 0                                      | N                                   |
| AC083899.1   | 0.701246545                            | N                                            | 0                                      | N                                   |
| CMTM8        | 0.701246545                            | N                                            | 0                                      | N                                   |
| COMMD1       | 0.701246545                            | N                                            | 1                                      | N                                   |
| SULT1B1      | 0.701246545                            | N                                            | 1                                      | N                                   |
| AC009269.5   | 0.701315001                            | N                                            | 0                                      | N                                   |

| Gene symbols | FDR (differential expression analysis) | Differentially expressed gene? Y, Yes; N, No | Number of insulin related publications | Insulin related gene? Y, Yes; N, No |
|--------------|----------------------------------------|----------------------------------------------|----------------------------------------|-------------------------------------|
| CYP2S1       | 0.701315001                            | N                                            | 0                                      | N                                   |
| DPP8         | 0.701371485                            | N                                            | 12                                     | N                                   |
| AC002310.2   | 0.701386291                            | N                                            | 0                                      | N                                   |
| FNIP1        | 0.701386291                            | N                                            | 1                                      | N                                   |
| AC010300.1   | 0.70162519                             | N                                            | 0                                      | N                                   |
| AC104653.1   | 0.70162519                             | N                                            | 0                                      | N                                   |
| AC118344.1   | 0.70162519                             | N                                            | 0                                      | N                                   |
| DYDC2        | 0.70162519                             | N                                            | 0                                      | N                                   |
| FAM169A      | 0.70162519                             | N                                            | 0                                      | N                                   |
| FBXO3        | 0.70162519                             | N                                            | 0                                      | N                                   |
| MALL         | 0.70162519                             | N                                            | 178                                    | Y                                   |
| RNF26        | 0.70162519                             | N                                            | 0                                      | N                                   |
| YPEL1        | 0.70162519                             | N                                            | 0                                      | N                                   |
| AC092593.1   | 0.701743898                            | N                                            | 0                                      | N                                   |
| AC233728.2   | 0.701743898                            | N                                            | 0                                      | N                                   |
| AL096700.1   | 0.701743898                            | N                                            | 0                                      | N                                   |
| BUD13P1      | 0.701743898                            | N                                            | 0                                      | N                                   |
| PPFIA1       | 0.701743898                            | N                                            | 1                                      | N                                   |
| SPATA7       | 0.701743898                            | N                                            | 0                                      | N                                   |
| AC010331.1   | 0.701839279                            | N                                            | 0                                      | N                                   |
| AL121917.1   | 0.701839279                            | N                                            | 0                                      | N                                   |
| CFAP221      | 0.701839279                            | N                                            | 0                                      | N                                   |
| EBF3         | 0.701839279                            | N                                            | 0                                      | N                                   |
| EIF3EP1      | 0.701839279                            | N                                            | 0                                      | N                                   |
| PIDD1        | 0.701839279                            | N                                            | 0                                      | N                                   |
| RNGTT        | 0.701839279                            | N                                            | 0                                      | N                                   |
| SCRIB        | 0.701839279                            | N                                            | 2                                      | N                                   |
| ZNF7         | 0.701839279                            | N                                            | 0                                      | N                                   |
| AC020917.3   | 0.701862574                            | N                                            | 0                                      | N                                   |
| AC013394.1   | 0.701885344                            | N                                            | 0                                      | N                                   |
| BTN3A2       | 0.701885344                            | N                                            | 1                                      | N                                   |
| ENOPH1       | 0.701885344                            | N                                            | 0                                      | N                                   |
| Metazoa_SRP  | 0.701885344                            | N                                            | 0                                      | N                                   |
| PAK1IP1      | 0.701885344                            | N                                            | 0                                      | N                                   |
| AC103740.1   | 0.70190517                             | N                                            | 0                                      | N                                   |
| MBD3         | 0.70190517                             | N                                            | 2                                      | N                                   |
| PFKL         | 0.70190517                             | N                                            | 7                                      | N                                   |
| PSMG2        | 0.70190517                             | N                                            | 0                                      | N                                   |
| AC037459.2   | 0.702291527                            | N                                            | 0                                      | N                                   |
| DOLPP1       | 0.702291527                            | N                                            | 0                                      | N                                   |
| LZTFL1       | 0.702291527                            | N                                            | 0                                      | N                                   |
| PRCD         | 0.702291527                            | N                                            | 0                                      | N                                   |
| AL162424.1   | 0.702609247                            | N                                            | 0                                      | N                                   |
| RN7SL425P    | 0.702834469                            | N                                            | 0                                      | N                                   |
| TDP2         | 0.702834469                            | N                                            | 0                                      | N                                   |
| ZNF222       | 0.702834469                            | N                                            | 0                                      | N                                   |
| AC015689.2   | 0.702877664                            | N                                            | 0                                      | N                                   |
| CFHR3        | 0.702877664                            | N                                            | 0                                      | N                                   |
| IGF1         | 0.702877664                            | N                                            | 1000                                   | Y                                   |
| PERM1        | 0.703033031                            | N                                            | 1                                      | N                                   |
| RN7SL861P    | 0.703033031                            | N                                            | 0                                      | N                                   |
| SNRPGP17     | 0.703103832                            | N                                            | 0                                      | N                                   |
| Z94721.2     | 0.703103832                            | N                                            | 0                                      | N                                   |
| AC005014.2   | 0.703132451                            | N                                            | 0                                      | N                                   |
| AC109631.1   | 0.703132451                            | N                                            | 0                                      | N                                   |
| CAMK2N1      | 0.703132451                            | N                                            | 3                                      | N                                   |
| LINC01979    | 0.703132451                            | N                                            | 0                                      | N                                   |
| MSANTD1      | 0.703132451                            | N                                            | 0                                      | N                                   |
| RBM12        | 0.703132451                            | N                                            | 0                                      | N                                   |
| SYT13        | 0.703132451                            | N                                            | 2                                      | N                                   |
| KCNMB3       | 0.703389234                            | N                                            | 1                                      | N                                   |
| PPME1        | 0.703389234                            | N                                            | 1                                      | N                                   |
| TFPI2        | 0.703389234                            | N                                            | 3                                      | N                                   |
| AL691477.1   | 0.703414268                            | N                                            | 0                                      | N                                   |
| HIC1         | 0.703552529                            | N                                            | 5                                      | N                                   |
| UCP3         | 0.703577293                            | N                                            | 277                                    | Y                                   |

| Gene symbols | FDR (differential expression analysis) | Differentially expressed gene? Y, Yes; N, No | Number of insulin related publications | Insulin related gene? Y, Yes; N, No |
|--------------|----------------------------------------|----------------------------------------------|----------------------------------------|-------------------------------------|
| IGDCC4       | 0.703650906                            | N                                            | 0                                      | N                                   |
| LINC00273    | 0.703650906                            | N                                            | 0                                      | N                                   |
| AC093423.3   | 0.703700897                            | N                                            | 0                                      | N                                   |
| CHP2         | 0.70372216                             | N                                            | 0                                      | N                                   |
| DDR1-AS1     | 0.70372216                             | N                                            | 0                                      | N                                   |
| KLHL23       | 0.703865346                            | N                                            | 0                                      | N                                   |
| KYAT3        | 0.703878484                            | N                                            | 0                                      | N                                   |
| AC008507.1   | 0.703930917                            | N                                            | 0                                      | N                                   |
| AL133338.2   | 0.703930917                            | N                                            | 0                                      | N                                   |
| CDS2         | 0.703930917                            | N                                            | 0                                      | N                                   |
| F3           | 0.703930917                            | N                                            | 175                                    | Y                                   |
| OIP5-AS1     | 0.703930917                            | N                                            | 0                                      | N                                   |
| PCBP2P1      | 0.703930917                            | N                                            | 0                                      | N                                   |
| TPRG1L       | 0.703930917                            | N                                            | 0                                      | N                                   |
| RUNDC3B      | 0.703983908                            | N                                            | 0                                      | N                                   |
| HIF1A        | 0.703986774                            | N                                            | 268                                    | Y                                   |
| LHX9         | 0.703986774                            | N                                            | 0                                      | N                                   |
| MTG1         | 0.704012881                            | N                                            | 1                                      | N                                   |
| CAMKK1       | 0.704175571                            | N                                            | 5                                      | N                                   |
| CLDND1       | 0.704175571                            | N                                            | 0                                      | N                                   |
| MAPK8IP1     | 0.704329864                            | N                                            | 15                                     | N                                   |
| TRNT1        | 0.704409305                            | N                                            | 1                                      | N                                   |
| AC092117.1   | 0.704555751                            | N                                            | 0                                      | N                                   |
| DGCR8        | 0.704555751                            | N                                            | 5                                      | N                                   |
| LRP2         | 0.704555751                            | N                                            | 11                                     | N                                   |
| POU2AF1      | 0.704580323                            | N                                            | 2                                      | N                                   |
| SMIM29       | 0.704580323                            | N                                            | 0                                      | N                                   |
| AC087500.1   | 0.70489991                             | N                                            | 0                                      | N                                   |
| ACO2         | 0.70489991                             | N                                            | 1                                      | N                                   |
| CLEC16A      | 0.704900153                            | N                                            | 12                                     | N                                   |
| AC011498.2   | 0.704975207                            | N                                            | 0                                      | N                                   |
| AC099796.2   | 0.704975207                            | N                                            | 0                                      | N                                   |
| FAM72A       | 0.704975207                            | N                                            | 0                                      | N                                   |
| GCN1         | 0.704975207                            | N                                            | 0                                      | N                                   |
| AC008696.1   | 0.705001167                            | N                                            | 0                                      | N                                   |
| AC010536.1   | 0.705001167                            | N                                            | 0                                      | N                                   |
| AL513343.1   | 0.705001167                            | N                                            | 0                                      | N                                   |
| Metazoa_SRP  | 0.705001167                            | N                                            | 0                                      | N                                   |
| AC002066.1   | 0.705246776                            | N                                            | 0                                      | N                                   |
| AC022762.2   | 0.705246776                            | N                                            | 0                                      | N                                   |
| D2HGDH       | 0.705246776                            | N                                            | 0                                      | N                                   |
| PSMC2        | 0.705246776                            | N                                            | 0                                      | N                                   |
| AC112206.4   | 0.70537719                             | N                                            | 0                                      | N                                   |
| GTF2IP20     | 0.70537719                             | N                                            | 0                                      | N                                   |
| DIXDC1       | 0.705445266                            | N                                            | 0                                      | N                                   |
| FMNL1        | 0.705445266                            | N                                            | 0                                      | N                                   |
| MRPS17P9     | 0.705445266                            | N                                            | 0                                      | N                                   |
| NT5C2        | 0.705445266                            | N                                            | 3                                      | N                                   |
| RDH14        | 0.705445266                            | N                                            | 0                                      | N                                   |
| TTY10        | 0.705445266                            | N                                            | 0                                      | N                                   |
| TULP3        | 0.705445266                            | N                                            | 1                                      | N                                   |
| ZNRD1        | 0.705445266                            | N                                            | 0                                      | N                                   |
| ATP5E        | 0.705736424                            | N                                            | 0                                      | N                                   |
| KLF7-IT1     | 0.705736424                            | N                                            | 0                                      | N                                   |
| AC087741.1   | 0.705788039                            | N                                            | 0                                      | N                                   |
| KLHL17       | 0.705788039                            | N                                            | 0                                      | N                                   |
| Metazoa_SRP  | 0.705788039                            | N                                            | 0                                      | N                                   |
| ACTN1        | 0.705789322                            | N                                            | 3                                      | N                                   |
| SLC35E2B     | 0.705939346                            | N                                            | 0                                      | N                                   |
| C4orf26      | 0.706113662                            | N                                            | 0                                      | N                                   |
| EPHB6        | 0.706113662                            | N                                            | 1                                      | N                                   |
| PNP          | 0.706198351                            | N                                            | 49                                     | N                                   |
| TRIL         | 0.706198351                            | N                                            | 0                                      | N                                   |
| PBDC1        | 0.70622982                             | N                                            | 0                                      | N                                   |
| SRSF9        | 0.70622982                             | N                                            | 0                                      | N                                   |
| CRACR2A      | 0.706320739                            | N                                            | 0                                      | N                                   |

| Gene symbols           | FDR (differential expression analysis) | Differentially expressed gene? Y, Yes; N, No | Number of insulin related publications | Insulin related gene? Y, Yes; N, No |
|------------------------|----------------------------------------|----------------------------------------------|----------------------------------------|-------------------------------------|
| TRMT6                  | 0.706320739                            | N                                            | 0                                      | N                                   |
| AC105074.1             | 0.706377442                            | N                                            | 0                                      | N                                   |
| TMEM144                | 0.706377442                            | N                                            | 0                                      | N                                   |
| PNPT1P1                | 0.706417084                            | N                                            | 0                                      | N                                   |
| AC008269.1             | 0.706429195                            | N                                            | 0                                      | N                                   |
| AP000864.1             | 0.706429195                            | N                                            | 0                                      | N                                   |
| AP005242.2             | 0.706670044                            | N                                            | 0                                      | N                                   |
| SYBU                   | 0.706718064                            | N                                            | 1                                      | N                                   |
| IFT46                  | 0.706744592                            | N                                            | 0                                      | N                                   |
| AC109454.4             | 0.70680763                             | N                                            | 0                                      | N                                   |
| AC120053.1             | 0.70680763                             | N                                            | 0                                      | N                                   |
| AL031119.1             | 0.70680763                             | N                                            | 0                                      | N                                   |
| AL162258.2             | 0.70680763                             | N                                            | 0                                      | N                                   |
| ANO2                   | 0.70680763                             | N                                            | 0                                      | N                                   |
| CAMK2A                 | 0.70680763                             | N                                            | 8                                      | N                                   |
| CCDC183-AS1            | 0.70680763                             | N                                            | 0                                      | N                                   |
| HSF2BP                 | 0.70680763                             | N                                            | 0                                      | N                                   |
| L3MBTL3                | 0.70680763                             | N                                            | 1                                      | N                                   |
| LINC01293              | 0.70680763                             | N                                            | 0                                      | N                                   |
| MPP7                   | 0.70680763                             | N                                            | 1                                      | N                                   |
| NRG1                   | 0.70680763                             | N                                            | 25                                     | N                                   |
| RPS6KB2                | 0.70680763                             | N                                            | 2                                      | N                                   |
| TLR7                   | 0.70680763                             | N                                            | 17                                     | N                                   |
| ZNF23                  | 0.70680763                             | N                                            | 0                                      | N                                   |
| ZSWIM5                 | 0.70680763                             | N                                            | 0                                      | N                                   |
| MYNN                   | 0.706807848                            | N                                            | 0                                      | N                                   |
| WHRN                   | 0.706807848                            | N                                            | 0                                      | N                                   |
| RAPGEFL1               | 0.706990422                            | N                                            | 0                                      | N                                   |
| AP005136.2             | 0.707066984                            | N                                            | 0                                      | N                                   |
| SNU13                  | 0.707073274                            | N                                            | 0                                      | N                                   |
| C5AR1                  | 0.707337692                            | N                                            | 5                                      | N                                   |
| AC016405.1             | 0.707420914                            | N                                            | 0                                      | N                                   |
| C19orf18               | 0.707420914                            | N                                            | 0                                      | N                                   |
| EYA1                   | 0.707420914                            | N                                            | 1                                      | N                                   |
| ACTBP11                | 0.707515947                            | N                                            | 0                                      | N                                   |
| XKR6                   | 0.707515947                            | N                                            | 0                                      | N                                   |
| ZNF662                 | 0.707515947                            | N                                            | 0                                      | N                                   |
| A1CF                   | 0.70752727                             | N                                            | 1                                      | N                                   |
| JUND                   | 0.70752727                             | N                                            | 25                                     | N                                   |
| EIF4ENIF1              | 0.707550404                            | N                                            | 1                                      | N                                   |
| AC021092.1             | 0.70757297                             | N                                            | 0                                      | N                                   |
| AC079610.1             | 0.70757297                             | N                                            | 0                                      | N                                   |
| C4orf3                 | 0.70757297                             | N                                            | 0                                      | N                                   |
| SLC38A10               | 0.70757297                             | N                                            | 1                                      | N                                   |
| SYF2                   | 0.70757297                             | N                                            | 0                                      | N                                   |
| ZNF629                 | 0.70757297                             | N                                            | 0                                      | N                                   |
| DR1                    | 0.707742285                            | N                                            | 72                                     | N                                   |
| PDIA4                  | 0.707742285                            | N                                            | 2                                      | N                                   |
| RPL36AL                | 0.707742285                            | N                                            | 0                                      | N                                   |
| TRIM26                 | 0.707742285                            | N                                            | 1                                      | N                                   |
| ZNRF1                  | 0.707805437                            | N                                            | 1                                      | N                                   |
| AC011225.1             | 0.707807747                            | N                                            | 0                                      | N                                   |
| Z98755.1               | 0.707900552                            | N                                            | 0                                      | N                                   |
| AC006141.1             | 0.707934212                            | N                                            | 0                                      | N                                   |
| C11orf88               | 0.707934212                            | N                                            | 0                                      | N                                   |
| GSTM5                  | 0.707934212                            | N                                            | 1                                      | N                                   |
| P4HTM                  | 0.707934212                            | N                                            | 0                                      | N                                   |
| PRR15                  | 0.707934212                            | N                                            | 0                                      | N                                   |
| SLC25A26               | 0.707934212                            | N                                            | 0                                      | N                                   |
| SNORA50B               | 0.707934212                            | N                                            | 0                                      | N                                   |
| SRA1                   | 0.707934212                            | N                                            | 1                                      | N                                   |
| DTX2P1-UPK3BP1-PMS2P11 | 0.70795706                             | N                                            | 0                                      | N                                   |
| AC007938.2             | 0.707993509                            | N                                            | 0                                      | N                                   |
| SNAI1                  | 0.707993509                            | N                                            | 16                                     | N                                   |
| BTBD10                 | 0.70808508                             | N                                            | 1                                      | N                                   |
| CPNE4                  | 0.70808508                             | N                                            | 0                                      | N                                   |



| Gene symbols | FDR (differential expression analysis) | Differentially expressed gene? Y, Yes; N, No | Number of insulin related publications | Insulin related gene? Y, Yes; N, No |
|--------------|----------------------------------------|----------------------------------------------|----------------------------------------|-------------------------------------|
| KIAA0556     | 0.70832248                             | N                                            | 0                                      | N                                   |
| KNDC1        | 0.70832248                             | N                                            | 0                                      | N                                   |
| AL133477.1   | 0.708357825                            | N                                            | 0                                      | N                                   |
| ANAPC16      | 0.708357825                            | N                                            | 0                                      | N                                   |
| FKBP1B       | 0.708357825                            | N                                            | 1                                      | N                                   |
| SNX9         | 0.708357825                            | N                                            | 1                                      | N                                   |
| TMEM65       | 0.708357825                            | N                                            | 0                                      | N                                   |
| AC110716.2   | 0.708380216                            | N                                            | 0                                      | N                                   |
| FAM161A      | 0.708380216                            | N                                            | 0                                      | N                                   |
| AC068831.1   | 0.708397767                            | N                                            | 0                                      | N                                   |
| AC093827.1   | 0.708397767                            | N                                            | 0                                      | N                                   |
| AL162727.1   | 0.708397767                            | N                                            | 0                                      | N                                   |
| CCDC183      | 0.708397767                            | N                                            | 0                                      | N                                   |
| ITGB1        | 0.708397767                            | N                                            | 8                                      | N                                   |
| KLF11        | 0.708397767                            | N                                            | 20                                     | N                                   |
| MYLK-AS1     | 0.708507994                            | N                                            | 0                                      | N                                   |
| SIM1         | 0.708507994                            | N                                            | 13                                     | N                                   |
| IRF1         | 0.708660499                            | N                                            | 19                                     | N                                   |
| ACTR1A       | 0.708950818                            | N                                            | 1                                      | N                                   |
| SEC61G       | 0.709012625                            | N                                            | 0                                      | N                                   |
| ATP10B       | 0.709078768                            | N                                            | 0                                      | N                                   |
| PYROXD2      | 0.709078768                            | N                                            | 1                                      | N                                   |
| C20orf196    | 0.709100013                            | N                                            | 0                                      | N                                   |
| ATL1         | 0.709105657                            | N                                            | 0                                      | N                                   |
| DSG3         | 0.709223863                            | N                                            | 0                                      | N                                   |
| AC009041.4   | 0.709246602                            | N                                            | 0                                      | N                                   |
| C9orf163     | 0.709311814                            | N                                            | 0                                      | N                                   |
| CALM2P3      | 0.709311814                            | N                                            | 0                                      | N                                   |
| CHRNE        | 0.709311814                            | N                                            | 0                                      | N                                   |
| CNTF         | 0.709311814                            | N                                            | 200                                    | Y                                   |
| DTX3L        | 0.709454358                            | N                                            | 0                                      | N                                   |
| GPR82        | 0.709454358                            | N                                            | 1                                      | N                                   |
| RHOA         | 0.709454358                            | N                                            | 159                                    | Y                                   |
| THRAP3P1     | 0.709454358                            | N                                            | 0                                      | N                                   |
| SLC25A5P5    | 0.709605029                            | N                                            | 0                                      | N                                   |
| AC073410.1   | 0.70976448                             | N                                            | 0                                      | N                                   |
| PTRH1        | 0.709858026                            | N                                            | 0                                      | N                                   |
| MAP1LC3B2    | 0.709924993                            | N                                            | 0                                      | N                                   |
| METTL15P1    | 0.709924993                            | N                                            | 0                                      | N                                   |
| CBR1         | 0.709973341                            | N                                            | 4                                      | N                                   |
| EVL          | 0.709973341                            | N                                            | 1                                      | N                                   |
| SCUBE3       | 0.709973341                            | N                                            | 1                                      | N                                   |
| FAM53B       | 0.710014155                            | N                                            | 0                                      | N                                   |
| BX322234.1   | 0.710085072                            | N                                            | 0                                      | N                                   |
| LMBR1L       | 0.710085072                            | N                                            | 0                                      | N                                   |
| AL355315.1   | 0.710110554                            | N                                            | 0                                      | N                                   |
| AGFG2        | 0.710138677                            | N                                            | 0                                      | N                                   |
| LY6G5C       | 0.710178085                            | N                                            | 0                                      | N                                   |
| ZNF93        | 0.710245327                            | N                                            | 0                                      | N                                   |
| FAM157C      | 0.710401057                            | N                                            | 0                                      | N                                   |
| RAB15        | 0.710401057                            | N                                            | 0                                      | N                                   |
| SLC25A5P1    | 0.710401057                            | N                                            | 0                                      | N                                   |
| AC109460.3   | 0.710421797                            | N                                            | 0                                      | N                                   |
| AL139396.1   | 0.710421797                            | N                                            | 0                                      | N                                   |
| ASCL2        | 0.710421797                            | N                                            | 16                                     | N                                   |
| COX7C        | 0.710421797                            | N                                            | 4                                      | N                                   |
| FAM117A      | 0.710421797                            | N                                            | 0                                      | N                                   |
| LINC01260    | 0.710421797                            | N                                            | 0                                      | N                                   |
| MCPH1-AS1    | 0.710421797                            | N                                            | 0                                      | N                                   |
| MED6         | 0.710421797                            | N                                            | 0                                      | N                                   |
| SYCP3        | 0.710421797                            | N                                            | 1                                      | N                                   |
| TMEM161B-AS1 | 0.710421797                            | N                                            | 0                                      | N                                   |
| ZG16B        | 0.710421797                            | N                                            | 0                                      | N                                   |
| SMIM31       | 0.710456557                            | N                                            | 0                                      | N                                   |
| AL157713.1   | 0.710643841                            | N                                            | 0                                      | N                                   |
| ANO4         | 0.710782595                            | N                                            | 0                                      | N                                   |

| Gene symbols    | FDR (differential expression analysis) | Differentially expressed gene? Y, Yes; N, No | Number of insulin related publications | Insulin related gene? Y, Yes; N, No |
|-----------------|----------------------------------------|----------------------------------------------|----------------------------------------|-------------------------------------|
| CRTAM           | 0.710792999                            | N                                            | 3                                      | N                                   |
| CAMKK2          | 0.710897338                            | N                                            | 16                                     | N                                   |
| SLC9A2          | 0.710897338                            | N                                            | 2                                      | N                                   |
| MACROD1         | 0.710946395                            | N                                            | 4                                      | N                                   |
| AC073136.2      | 0.711095849                            | N                                            | 0                                      | N                                   |
| ARV1            | 0.711095849                            | N                                            | 1                                      | N                                   |
| EIF2S3          | 0.711095849                            | N                                            | 1                                      | N                                   |
| KHSRP           | 0.711095849                            | N                                            | 1                                      | N                                   |
| RPL23AP34       | 0.711095849                            | N                                            | 0                                      | N                                   |
| C9orf106        | 0.71111273                             | N                                            | 0                                      | N                                   |
| AC092756.1      | 0.711179613                            | N                                            | 0                                      | N                                   |
| AMOTL1          | 0.71118806                             | N                                            | 0                                      | N                                   |
| ZBTB41          | 0.711587152                            | N                                            | 0                                      | N                                   |
| AC005329.1      | 0.711597828                            | N                                            | 0                                      | N                                   |
| ACAA2           | 0.711598557                            | N                                            | 9                                      | N                                   |
| ATP1B3          | 0.711598557                            | N                                            | 0                                      | N                                   |
| KCTD16          | 0.711598557                            | N                                            | 0                                      | N                                   |
| NKAP            | 0.711598557                            | N                                            | 2                                      | N                                   |
| AC091544.5      | 0.711805113                            | N                                            | 0                                      | N                                   |
| AGAP4           | 0.711844547                            | N                                            | 0                                      | N                                   |
| ZNF548          | 0.711844547                            | N                                            | 0                                      | N                                   |
| TSSK6           | 0.7121601                              | N                                            | 0                                      | N                                   |
| VPS26BP1        | 0.712226201                            | N                                            | 0                                      | N                                   |
| ENKUR           | 0.71229951                             | N                                            | 0                                      | N                                   |
| HNRNPA1P54      | 0.71229951                             | N                                            | 0                                      | N                                   |
| KIAA0319        | 0.71229951                             | N                                            | 0                                      | N                                   |
| SAMM50          | 0.71229951                             | N                                            | 1                                      | N                                   |
| URB1-AS1        | 0.71229951                             | N                                            | 0                                      | N                                   |
| AC078795.3      | 0.712660771                            | N                                            | 0                                      | N                                   |
| AC007342.6      | 0.712745759                            | N                                            | 0                                      | N                                   |
| AC015799.1      | 0.712745759                            | N                                            | 0                                      | N                                   |
| AL365209.1      | 0.712745759                            | N                                            | 0                                      | N                                   |
| AP000897.1      | 0.712745759                            | N                                            | 0                                      | N                                   |
| AP002414.4      | 0.712745759                            | N                                            | 0                                      | N                                   |
| ASCC1           | 0.712745759                            | N                                            | 0                                      | N                                   |
| BCKDHB          | 0.712745759                            | N                                            | 1                                      | N                                   |
| CASP4           | 0.712745759                            | N                                            | 5                                      | N                                   |
| CCDC122         | 0.712745759                            | N                                            | 0                                      | N                                   |
| CD22            | 0.712745759                            | N                                            | 1                                      | N                                   |
| CEACAM22P       | 0.712745759                            | N                                            | 0                                      | N                                   |
| CNTD1           | 0.712745759                            | N                                            | 0                                      | N                                   |
| DUBR            | 0.712745759                            | N                                            | 0                                      | N                                   |
| ELMOD1          | 0.712745759                            | N                                            | 0                                      | N                                   |
| GGN             | 0.712745759                            | N                                            | 6                                      | N                                   |
| HIST1H3E        | 0.712745759                            | N                                            | 0                                      | N                                   |
| IER3            | 0.712745759                            | N                                            | 1                                      | N                                   |
| KRT33B          | 0.712745759                            | N                                            | 0                                      | N                                   |
| LINC01023       | 0.712745759                            | N                                            | 0                                      | N                                   |
| LINC01786       | 0.712745759                            | N                                            | 0                                      | N                                   |
| MAP4K5          | 0.712745759                            | N                                            | 1                                      | N                                   |
| MVP             | 0.712745759                            | N                                            | 14                                     | N                                   |
| PDXDC2P-NPIP14P | 0.712745759                            | N                                            | 0                                      | N                                   |
| PHLDA2          | 0.712745759                            | N                                            | 13                                     | N                                   |
| RIF1            | 0.712745759                            | N                                            | 4                                      | N                                   |
| SOX2            | 0.712745759                            | N                                            | 108                                    | Y                                   |
| ZNF346-IT1      | 0.712745759                            | N                                            | 0                                      | N                                   |
| CA14            | 0.712862071                            | N                                            | 0                                      | N                                   |
| RIMBP2          | 0.712862071                            | N                                            | 0                                      | N                                   |
| AC087763.1      | 0.713290059                            | N                                            | 0                                      | N                                   |
| AC105021.1      | 0.713345539                            | N                                            | 0                                      | N                                   |
| AC244197.2      | 0.713345539                            | N                                            | 0                                      | N                                   |
| AL589986.2      | 0.713345539                            | N                                            | 0                                      | N                                   |
| ALG1            | 0.713345539                            | N                                            | 1                                      | N                                   |
| ANKRD13D        | 0.713345539                            | N                                            | 0                                      | N                                   |
| CCDC82          | 0.713345539                            | N                                            | 0                                      | N                                   |
| CSTF3           | 0.713345539                            | N                                            | 1                                      | N                                   |

| Gene symbols | FDR (differential expression analysis) | Differentially expressed gene? Y, Yes; N, No | Number of insulin related publications | Insulin related gene? Y, Yes; N, No |
|--------------|----------------------------------------|----------------------------------------------|----------------------------------------|-------------------------------------|
| DIABLO       | 0.713345539                            | N                                            | 26                                     | N                                   |
| LRRC37B      | 0.713345539                            | N                                            | 0                                      | N                                   |
| MRO          | 0.713345539                            | N                                            | 2                                      | N                                   |
| PEBP1        | 0.713345539                            | N                                            | 5                                      | N                                   |
| RPS21P4      | 0.713345539                            | N                                            | 0                                      | N                                   |
| AC024580.1   | 0.713455253                            | N                                            | 0                                      | N                                   |
| TMEM67       | 0.713455253                            | N                                            | 0                                      | N                                   |
| FOXD2        | 0.713484907                            | N                                            | 0                                      | N                                   |
| LMOD3        | 0.713484907                            | N                                            | 0                                      | N                                   |
| SPHK1        | 0.713484907                            | N                                            | 23                                     | N                                   |
| SCN9A        | 0.713669652                            | N                                            | 6                                      | N                                   |
| INTS11       | 0.713682021                            | N                                            | 0                                      | N                                   |
| AC010889.1   | 0.713774766                            | N                                            | 0                                      | N                                   |
| AL596202.1   | 0.713774766                            | N                                            | 0                                      | N                                   |
| ARMC6        | 0.713774766                            | N                                            | 0                                      | N                                   |
| CHRFAM7A     | 0.713774766                            | N                                            | 0                                      | N                                   |
| CR545473.1   | 0.713774766                            | N                                            | 0                                      | N                                   |
| FAM3C        | 0.713774766                            | N                                            | 8                                      | N                                   |
| ITK          | 0.713774766                            | N                                            | 3                                      | N                                   |
| LINC00461    | 0.713774766                            | N                                            | 0                                      | N                                   |
| MANSC1       | 0.713774766                            | N                                            | 0                                      | N                                   |
| NAPA-AS1     | 0.713774766                            | N                                            | 0                                      | N                                   |
| SHISA9       | 0.713774766                            | N                                            | 0                                      | N                                   |
| SPTY2D1-AS1  | 0.713774766                            | N                                            | 0                                      | N                                   |
| TIMM8BP2     | 0.713774766                            | N                                            | 0                                      | N                                   |
| TNFRSF10B    | 0.713774766                            | N                                            | 6                                      | N                                   |
| ZYG11B       | 0.713774766                            | N                                            | 0                                      | N                                   |
| ABII         | 0.713818107                            | N                                            | 1                                      | N                                   |
| AC092134.2   | 0.713818107                            | N                                            | 0                                      | N                                   |
| AL133372.2   | 0.713818107                            | N                                            | 0                                      | N                                   |
| AP000943.3   | 0.713818107                            | N                                            | 0                                      | N                                   |
| CLCN7        | 0.713818107                            | N                                            | 1                                      | N                                   |
| DLGAP3       | 0.713818107                            | N                                            | 0                                      | N                                   |
| EFR3B        | 0.713818107                            | N                                            | 0                                      | N                                   |
| ELOA         | 0.713818107                            | N                                            | 0                                      | N                                   |
| GSTP1        | 0.713818107                            | N                                            | 63                                     | N                                   |
| MCTP2        | 0.713818107                            | N                                            | 0                                      | N                                   |
| MTND5P26     | 0.713818107                            | N                                            | 0                                      | N                                   |
| POLG2        | 0.713818107                            | N                                            | 1                                      | N                                   |
| SALL1        | 0.713818107                            | N                                            | 1                                      | N                                   |
| SH3BGR       | 0.713818107                            | N                                            | 0                                      | N                                   |
| ZCCHC8       | 0.713818107                            | N                                            | 0                                      | N                                   |
| ZFYVE21      | 0.713818107                            | N                                            | 0                                      | N                                   |
| ESF1         | 0.713927264                            | N                                            | 0                                      | N                                   |
| EIPR1        | 0.713955877                            | N                                            | 1                                      | N                                   |
| ENDOV        | 0.713973484                            | N                                            | 2                                      | N                                   |
| LINC02188    | 0.714123743                            | N                                            | 0                                      | N                                   |
| AC073575.2   | 0.7141917                              | N                                            | 0                                      | N                                   |
| C19orf47     | 0.7141917                              | N                                            | 0                                      | N                                   |
| PLIN2        | 0.7141917                              | N                                            | 72                                     | N                                   |
| TMEM217      | 0.7141917                              | N                                            | 0                                      | N                                   |
| UBIAD1       | 0.7141917                              | N                                            | 1                                      | N                                   |
| FSBP         | 0.71441837                             | N                                            | 1                                      | N                                   |
| AP001528.3   | 0.714624475                            | N                                            | 0                                      | N                                   |
| AL139020.1   | 0.714875996                            | N                                            | 0                                      | N                                   |
| SPIRE1       | 0.714947207                            | N                                            | 0                                      | N                                   |
| RPL5P13      | 0.715009131                            | N                                            | 0                                      | N                                   |
| ZNF350       | 0.715009131                            | N                                            | 0                                      | N                                   |
| FAM83C       | 0.715162053                            | N                                            | 0                                      | N                                   |
| NFKB2        | 0.715363061                            | N                                            | 3                                      | N                                   |
| AL122035.1   | 0.715451808                            | N                                            | 0                                      | N                                   |
| SNORA74B     | 0.715451808                            | N                                            | 0                                      | N                                   |
| ZNF713       | 0.715566985                            | N                                            | 0                                      | N                                   |
| TGFBR2       | 0.715737571                            | N                                            | 255                                    | Y                                   |
| AC092184.1   | 0.71593116                             | N                                            | 0                                      | N                                   |
| ESR1         | 0.71593116                             | N                                            | 99                                     | N                                   |

| Gene symbols  | FDR (differential expression analysis) | Differentially expressed gene? Y, Yes; N, No | Number of insulin related publications | Insulin related gene? Y, Yes; N, No |
|---------------|----------------------------------------|----------------------------------------------|----------------------------------------|-------------------------------------|
| FGGY          | 0.71593116                             | N                                            | 0                                      | N                                   |
| SOX7          | 0.71593116                             | N                                            | 3                                      | N                                   |
| AL355102.1    | 0.716030197                            | N                                            | 0                                      | N                                   |
| APOBR         | 0.71606236                             | N                                            | 7                                      | N                                   |
| AC012313.2    | 0.716091904                            | N                                            | 0                                      | N                                   |
| AC097375.3    | 0.716091904                            | N                                            | 0                                      | N                                   |
| AL359397.2    | 0.716091904                            | N                                            | 0                                      | N                                   |
| C1QTNF1       | 0.716091904                            | N                                            | 10                                     | N                                   |
| OTUB2         | 0.716091904                            | N                                            | 1                                      | N                                   |
| AC005336.2    | 0.716258205                            | N                                            | 0                                      | N                                   |
| AL020997.1    | 0.716258205                            | N                                            | 0                                      | N                                   |
| ALKBH6        | 0.716258205                            | N                                            | 0                                      | N                                   |
| LINC02395     | 0.716258205                            | N                                            | 0                                      | N                                   |
| RNU2-63P      | 0.716258205                            | N                                            | 0                                      | N                                   |
| TM2D2         | 0.716258205                            | N                                            | 0                                      | N                                   |
| UGT8          | 0.716258205                            | N                                            | 0                                      | N                                   |
| LACC1         | 0.716402572                            | N                                            | 0                                      | N                                   |
| AC138696.2    | 0.71651609                             | N                                            | 0                                      | N                                   |
| IDH3A         | 0.716630108                            | N                                            | 1                                      | N                                   |
| FOXJ2         | 0.716672514                            | N                                            | 0                                      | N                                   |
| AC016717.2    | 0.716755348                            | N                                            | 0                                      | N                                   |
| AL365440.1    | 0.716755348                            | N                                            | 0                                      | N                                   |
| BAGE2         | 0.716755348                            | N                                            | 0                                      | N                                   |
| HDGFL2        | 0.716755348                            | N                                            | 0                                      | N                                   |
| MTCO1P11      | 0.716755348                            | N                                            | 0                                      | N                                   |
| SPATA2        | 0.716755348                            | N                                            | 0                                      | N                                   |
| CYSTM1        | 0.716932622                            | N                                            | 0                                      | N                                   |
| HTR6          | 0.716932622                            | N                                            | 0                                      | N                                   |
| AC025279.1    | 0.717347547                            | N                                            | 0                                      | N                                   |
| AL353803.4    | 0.717347547                            | N                                            | 0                                      | N                                   |
| AC136469.1    | 0.71739715                             | N                                            | 0                                      | N                                   |
| AL031963.3    | 0.71739715                             | N                                            | 0                                      | N                                   |
| CBS           | 0.71739715                             | N                                            | 67                                     | N                                   |
| CLEC12A-AS1   | 0.71739715                             | N                                            | 0                                      | N                                   |
| DNAJC2        | 0.71739715                             | N                                            | 1                                      | N                                   |
| AC015912.3    | 0.717492969                            | N                                            | 0                                      | N                                   |
| AL080250.1    | 0.717492969                            | N                                            | 0                                      | N                                   |
| CILP2         | 0.717492969                            | N                                            | 3                                      | N                                   |
| CNDP1         | 0.717492969                            | N                                            | 2                                      | N                                   |
| CTTN          | 0.717492969                            | N                                            | 1                                      | N                                   |
| ENOX1         | 0.717492969                            | N                                            | 1                                      | N                                   |
| TEFM          | 0.717492969                            | N                                            | 1                                      | N                                   |
| AL121672.3    | 0.717501959                            | N                                            | 0                                      | N                                   |
| CFAP20        | 0.717501959                            | N                                            | 0                                      | N                                   |
| FES           | 0.717501959                            | N                                            | 66                                     | N                                   |
| GOT2P3        | 0.717501959                            | N                                            | 0                                      | N                                   |
| AC016831.1    | 0.717511913                            | N                                            | 0                                      | N                                   |
| AC141586.5    | 0.717511913                            | N                                            | 0                                      | N                                   |
| AL022323.5    | 0.717511913                            | N                                            | 0                                      | N                                   |
| AL450992.2    | 0.717511913                            | N                                            | 0                                      | N                                   |
| BMPR1B        | 0.717511913                            | N                                            | 2                                      | N                                   |
| CFL1          | 0.717511913                            | N                                            | 3                                      | N                                   |
| DNAJC25-GNG10 | 0.717511913                            | N                                            | 0                                      | N                                   |
| EIF2AK4       | 0.717511913                            | N                                            | 20                                     | N                                   |
| PSMA3P        | 0.717511913                            | N                                            | 0                                      | N                                   |
| RP2           | 0.717511913                            | N                                            | 15                                     | N                                   |
| TMEM25        | 0.717511913                            | N                                            | 0                                      | N                                   |
| TSPAN14       | 0.717511913                            | N                                            | 0                                      | N                                   |
| TXNL1         | 0.717511913                            | N                                            | 3                                      | N                                   |
| AP005202.1    | 0.717518186                            | N                                            | 0                                      | N                                   |
| FOXD1         | 0.717518186                            | N                                            | 4                                      | N                                   |
| RPS19BP1      | 0.717518186                            | N                                            | 1                                      | N                                   |
| FAM60CP       | 0.717590337                            | N                                            | 0                                      | N                                   |
| FAM66C        | 0.717590337                            | N                                            | 0                                      | N                                   |
| MTHFSD        | 0.717590337                            | N                                            | 0                                      | N                                   |
| AP001528.1    | 0.717678748                            | N                                            | 0                                      | N                                   |

| Gene symbols | FDR (differential expression analysis) | Differentially expressed gene? Y, Yes; N, No | Number of insulin related publications | Insulin related gene? Y, Yes; N, No |
|--------------|----------------------------------------|----------------------------------------------|----------------------------------------|-------------------------------------|
| BX284668.6   | 0.717678748                            | N                                            | 0                                      | N                                   |
| MED1         | 0.717678748                            | N                                            | 41                                     | N                                   |
| MSRB3        | 0.717678748                            | N                                            | 0                                      | N                                   |
| SLC38A9      | 0.717678748                            | N                                            | 2                                      | N                                   |
| TMEM102      | 0.717678748                            | N                                            | 0                                      | N                                   |
| STK38        | 0.717714404                            | N                                            | 0                                      | N                                   |
| AC105202.1   | 0.717734493                            | N                                            | 0                                      | N                                   |
| HIST2H2AA4   | 0.717734493                            | N                                            | 0                                      | N                                   |
| AL353763.1   | 0.717765624                            | N                                            | 0                                      | N                                   |
| CSMD2        | 0.717765624                            | N                                            | 0                                      | N                                   |
| RREB1        | 0.71776769                             | N                                            | 4                                      | N                                   |
| STAR         | 0.717971448                            | N                                            | 389                                    | Y                                   |
| AP002001.1   | 0.718086126                            | N                                            | 0                                      | N                                   |
| SMG1P1       | 0.718086126                            | N                                            | 0                                      | N                                   |
| AC100778.3   | 0.718388208                            | N                                            | 0                                      | N                                   |
| AC005821.1   | 0.718394999                            | N                                            | 0                                      | N                                   |
| METTLL17     | 0.718394999                            | N                                            | 0                                      | N                                   |
| MSL2         | 0.718394999                            | N                                            | 0                                      | N                                   |
| AC074135.1   | 0.718529337                            | N                                            | 0                                      | N                                   |
| AL138889.1   | 0.718529337                            | N                                            | 0                                      | N                                   |
| NANOS1       | 0.718681614                            | N                                            | 0                                      | N                                   |
| MATN1-AS1    | 0.71897609                             | N                                            | 0                                      | N                                   |
| CHMP3        | 0.719039612                            | N                                            | 3                                      | N                                   |
| KLF15        | 0.719039612                            | N                                            | 26                                     | N                                   |
| MLST8        | 0.719122296                            | N                                            | 11                                     | N                                   |
| ACAD8        | 0.719236563                            | N                                            | 0                                      | N                                   |
| PIGUP1       | 0.719236563                            | N                                            | 0                                      | N                                   |
| STEAP3       | 0.719475622                            | N                                            | 1                                      | N                                   |
| MAPK3        | 0.7195611                              | N                                            | 39                                     | N                                   |
| AC010618.3   | 0.71961524                             | N                                            | 0                                      | N                                   |
| SLMAP        | 0.71961524                             | N                                            | 1                                      | N                                   |
| BOC          | 0.71967026                             | N                                            | 39                                     | N                                   |
| AC023024.1   | 0.71988476                             | N                                            | 0                                      | N                                   |
| AC007969.2   | 0.719978126                            | N                                            | 0                                      | N                                   |
| AP000432.2   | 0.719978126                            | N                                            | 0                                      | N                                   |
| AC105416.1   | 0.719998732                            | N                                            | 0                                      | N                                   |
| KIF21A       | 0.720083309                            | N                                            | 0                                      | N                                   |
| DCLRE1B      | 0.720086991                            | N                                            | 0                                      | N                                   |
| GPR78        | 0.720086991                            | N                                            | 0                                      | N                                   |
| IDUA         | 0.720086991                            | N                                            | 7                                      | N                                   |
| NFE2L3P1     | 0.720086991                            | N                                            | 0                                      | N                                   |
| SPRED1       | 0.720086991                            | N                                            | 1                                      | N                                   |
| AFG3L2P1     | 0.720344225                            | N                                            | 0                                      | N                                   |
| AL360181.3   | 0.720344225                            | N                                            | 0                                      | N                                   |
| TMEM169      | 0.720344225                            | N                                            | 0                                      | N                                   |
| AC005519.2   | 0.720356897                            | N                                            | 0                                      | N                                   |
| AL008729.2   | 0.720356897                            | N                                            | 0                                      | N                                   |
| AP004289.1   | 0.720356897                            | N                                            | 0                                      | N                                   |
| ASB5         | 0.720356897                            | N                                            | 0                                      | N                                   |
| LIMD2        | 0.720356897                            | N                                            | 1                                      | N                                   |
| NAXD         | 0.720356897                            | N                                            | 0                                      | N                                   |
| PTPN11       | 0.720356897                            | N                                            | 143                                    | Y                                   |
| RPL17        | 0.720356897                            | N                                            | 0                                      | N                                   |
| SEM1P1       | 0.720356897                            | N                                            | 0                                      | N                                   |
| SSTR5        | 0.720356897                            | N                                            | 87                                     | N                                   |
| TREX1        | 0.720356897                            | N                                            | 2                                      | N                                   |
| UHMK1        | 0.720356897                            | N                                            | 1                                      | N                                   |
| ZNF799       | 0.720356897                            | N                                            | 0                                      | N                                   |
| ZNF831       | 0.720356897                            | N                                            | 1                                      | N                                   |
| TAS2R19      | 0.720364926                            | N                                            | 0                                      | N                                   |
| AC021106.3   | 0.720576815                            | N                                            | 0                                      | N                                   |
| DPYSL4       | 0.720576815                            | N                                            | 0                                      | N                                   |
| HSD17B4      | 0.720576815                            | N                                            | 4                                      | N                                   |
| MIR381HG     | 0.720576815                            | N                                            | 0                                      | N                                   |
| NOS2P3       | 0.720576815                            | N                                            | 0                                      | N                                   |
| RPL38P4      | 0.720576815                            | N                                            | 0                                      | N                                   |

| Gene symbols | FDR (differential expression analysis) | Differentially expressed gene? Y, Yes; N, No | Number of insulin related publications | Insulin related gene? Y, Yes; N, No |
|--------------|----------------------------------------|----------------------------------------------|----------------------------------------|-------------------------------------|
| AC007666.1   | 0.720603934                            | N                                            | 0                                      | N                                   |
| AC098864.1   | 0.720603934                            | N                                            | 0                                      | N                                   |
| AC104623.2   | 0.720603934                            | N                                            | 0                                      | N                                   |
| BST2         | 0.720603934                            | N                                            | 0                                      | N                                   |
| CCDC127      | 0.720603934                            | N                                            | 0                                      | N                                   |
| CXCL5        | 0.720603934                            | N                                            | 31                                     | N                                   |
| NEK7         | 0.720603934                            | N                                            | 2                                      | N                                   |
| RBBP4P1      | 0.720603934                            | N                                            | 0                                      | N                                   |
| TRPM4        | 0.720603934                            | N                                            | 22                                     | N                                   |
| TWNK         | 0.720603934                            | N                                            | 0                                      | N                                   |
| WBP1         | 0.720603934                            | N                                            | 0                                      | N                                   |
| ZNF826P      | 0.720603934                            | N                                            | 0                                      | N                                   |
| DCTN1        | 0.720686074                            | N                                            | 3                                      | N                                   |
| C17orf75     | 0.721076218                            | N                                            | 1                                      | N                                   |
| HINT1        | 0.721076218                            | N                                            | 2                                      | N                                   |
| PHBP21       | 0.721076218                            | N                                            | 0                                      | N                                   |
| AL662844.4   | 0.721201198                            | N                                            | 0                                      | N                                   |
| GTF3C1       | 0.721205901                            | N                                            | 0                                      | N                                   |
| AC012640.2   | 0.721319954                            | N                                            | 0                                      | N                                   |
| NEDD8        | 0.721319954                            | N                                            | 3                                      | N                                   |
| NLRP12       | 0.721319954                            | N                                            | 1                                      | N                                   |
| SESTD1       | 0.721319954                            | N                                            | 0                                      | N                                   |
| STK24P1      | 0.721319954                            | N                                            | 0                                      | N                                   |
| TOB1-AS1     | 0.721319954                            | N                                            | 0                                      | N                                   |
| AL357055.3   | 0.721340307                            | N                                            | 0                                      | N                                   |
| ARID5A       | 0.721347489                            | N                                            | 0                                      | N                                   |
| MDH1         | 0.721347489                            | N                                            | 3                                      | N                                   |
| TSEN2        | 0.721347489                            | N                                            | 0                                      | N                                   |
| TTC14        | 0.721347489                            | N                                            | 0                                      | N                                   |
| AC004816.1   | 0.721409555                            | N                                            | 0                                      | N                                   |
| AC022296.2   | 0.721409555                            | N                                            | 0                                      | N                                   |
| AC026250.1   | 0.721409555                            | N                                            | 0                                      | N                                   |
| APEX1        | 0.721409555                            | N                                            | 1                                      | N                                   |
| CDK16        | 0.721409555                            | N                                            | 1                                      | N                                   |
| DNAH11       | 0.721409555                            | N                                            | 0                                      | N                                   |
| FEZ2         | 0.721409555                            | N                                            | 0                                      | N                                   |
| RNF139-AS1   | 0.721409555                            | N                                            | 0                                      | N                                   |
| SLC45A4      | 0.721409555                            | N                                            | 0                                      | N                                   |
| UTRN         | 0.721409555                            | N                                            | 2                                      | N                                   |
| LRRC63       | 0.721411535                            | N                                            | 0                                      | N                                   |
| AC073367.1   | 0.721445386                            | N                                            | 0                                      | N                                   |
| IBA57-AS1    | 0.721492476                            | N                                            | 0                                      | N                                   |
| LINC00886    | 0.721492476                            | N                                            | 0                                      | N                                   |
| PIIP5K1      | 0.721492476                            | N                                            | 3                                      | N                                   |
| REV1         | 0.721492476                            | N                                            | 0                                      | N                                   |
| RXR8         | 0.721492476                            | N                                            | 1                                      | N                                   |
| ZNF584       | 0.721492476                            | N                                            | 0                                      | N                                   |
| ARL4A        | 0.72149786                             | N                                            | 1                                      | N                                   |
| TMEM182      | 0.721642133                            | N                                            | 0                                      | N                                   |
| C18orf15     | 0.721670801                            | N                                            | 0                                      | N                                   |
| HEATR5B      | 0.721674851                            | N                                            | 0                                      | N                                   |
| NIP7P2       | 0.721674851                            | N                                            | 0                                      | N                                   |
| AC073611.1   | 0.721815356                            | N                                            | 0                                      | N                                   |
| ARRDC4       | 0.72190688                             | N                                            | 4                                      | N                                   |
| GSEC         | 0.72190688                             | N                                            | 0                                      | N                                   |
| MYH7B        | 0.72190688                             | N                                            | 0                                      | N                                   |
| PPP2R2A      | 0.72190688                             | N                                            | 4                                      | N                                   |
| RIDA         | 0.72190688                             | N                                            | 18                                     | N                                   |
| C19orf68     | 0.721966451                            | N                                            | 0                                      | N                                   |
| ANKRD53      | 0.722098122                            | N                                            | 0                                      | N                                   |
| AC007728.2   | 0.722189314                            | N                                            | 0                                      | N                                   |
| RP9P         | 0.722189314                            | N                                            | 0                                      | N                                   |
| CNTN2        | 0.722241527                            | N                                            | 0                                      | N                                   |
| CEP120       | 0.722331283                            | N                                            | 0                                      | N                                   |
| AC136632.2   | 0.722343719                            | N                                            | 0                                      | N                                   |
| AC009220.2   | 0.722461982                            | N                                            | 0                                      | N                                   |

| Gene symbols | FDR (differential expression analysis) | Differentially expressed gene? Y, Yes; N, No | Number of insulin related publications | Insulin related gene? Y, Yes; N, No |
|--------------|----------------------------------------|----------------------------------------------|----------------------------------------|-------------------------------------|
| ACSF2        | 0.722461982                            | N                                            | 0                                      | N                                   |
| BAG1         | 0.722461982                            | N                                            | 3                                      | N                                   |
| MROH9        | 0.722578761                            | N                                            | 0                                      | N                                   |
| SGSM2        | 0.72274786                             | N                                            | 2                                      | N                                   |
| AL513210.1   | 0.723072961                            | N                                            | 0                                      | N                                   |
| RBMS3        | 0.723072961                            | N                                            | 0                                      | N                                   |
| FNBP4        | 0.723156168                            | N                                            | 0                                      | N                                   |
| ELP3         | 0.723166201                            | N                                            | 1                                      | N                                   |
| ADGB         | 0.723272532                            | N                                            | 0                                      | N                                   |
| FLYWCH1P1    | 0.723272532                            | N                                            | 0                                      | N                                   |
| AEBP1        | 0.723329742                            | N                                            | 4                                      | N                                   |
| AL589743.1   | 0.723329742                            | N                                            | 0                                      | N                                   |
| ATP13A4      | 0.723329742                            | N                                            | 0                                      | N                                   |
| CP           | 0.723329742                            | N                                            | 1000                                   | Y                                   |
| GPANK1       | 0.723329742                            | N                                            | 0                                      | N                                   |
| MIAP         | 0.723329742                            | N                                            | 0                                      | N                                   |
| AC125238.2   | 0.723488398                            | N                                            | 0                                      | N                                   |
| MREG         | 0.723488398                            | N                                            | 1                                      | N                                   |
| MRPS12       | 0.723506788                            | N                                            | 0                                      | N                                   |
| AC115618.3   | 0.723695856                            | N                                            | 0                                      | N                                   |
| RN7SL368P    | 0.723695856                            | N                                            | 0                                      | N                                   |
| CNN3         | 0.723803017                            | N                                            | 1                                      | N                                   |
| ZNF319       | 0.723833868                            | N                                            | 0                                      | N                                   |
| LRCH4        | 0.723955947                            | N                                            | 0                                      | N                                   |
| LRP4         | 0.723955947                            | N                                            | 3                                      | N                                   |
| MED11        | 0.723955947                            | N                                            | 0                                      | N                                   |
| PMEPA1       | 0.723955947                            | N                                            | 1                                      | N                                   |
| NPTN         | 0.724043111                            | N                                            | 0                                      | N                                   |
| RAC1         | 0.724135225                            | N                                            | 235                                    | Y                                   |
| MRPS18A      | 0.724200607                            | N                                            | 0                                      | N                                   |
| LINC00620    | 0.724708025                            | N                                            | 0                                      | N                                   |
| HSPA8        | 0.724803028                            | N                                            | 14                                     | N                                   |
| TSM          | 0.724803028                            | N                                            | 0                                      | N                                   |
| ZCCHC2       | 0.724803028                            | N                                            | 0                                      | N                                   |
| LGALS1       | 0.724842778                            | N                                            | 23                                     | N                                   |
| AC007938.4   | 0.724856827                            | N                                            | 0                                      | N                                   |
| AC016739.1   | 0.724856827                            | N                                            | 0                                      | N                                   |
| ADAMTS10     | 0.724856827                            | N                                            | 0                                      | N                                   |
| AL390838.1   | 0.724856827                            | N                                            | 0                                      | N                                   |
| AP001160.4   | 0.724856827                            | N                                            | 0                                      | N                                   |
| KLHDC3       | 0.724856827                            | N                                            | 0                                      | N                                   |
| PCYT1B       | 0.724856827                            | N                                            | 0                                      | N                                   |
| RCBTB1       | 0.724856827                            | N                                            | 0                                      | N                                   |
| SDCCAG3P2    | 0.724856827                            | N                                            | 0                                      | N                                   |
| SZT2         | 0.724856827                            | N                                            | 0                                      | N                                   |
| DNM1P34      | 0.724933265                            | N                                            | 0                                      | N                                   |
| NAA20        | 0.724933265                            | N                                            | 0                                      | N                                   |
| AC120498.9   | 0.724955608                            | N                                            | 0                                      | N                                   |
| PSMD10P3     | 0.724972106                            | N                                            | 0                                      | N                                   |
| UROS         | 0.725020398                            | N                                            | 1                                      | N                                   |
| ZC3H12D      | 0.725063544                            | N                                            | 0                                      | N                                   |
| TM6SF1       | 0.725337931                            | N                                            | 0                                      | N                                   |
| ZNF484       | 0.725337931                            | N                                            | 0                                      | N                                   |
| AL589666.1   | 0.72540444                             | N                                            | 0                                      | N                                   |
| TDRKH        | 0.72540444                             | N                                            | 0                                      | N                                   |
| ARFIP2       | 0.725834979                            | N                                            | 1                                      | N                                   |
| MDGA1        | 0.725960872                            | N                                            | 1                                      | N                                   |
| AP001043.1   | 0.726077015                            | N                                            | 0                                      | N                                   |
| NMT1         | 0.726180155                            | N                                            | 0                                      | N                                   |
| LEMD3        | 0.7264434                              | N                                            | 0                                      | N                                   |
| POLM         | 0.7264434                              | N                                            | 0                                      | N                                   |
| PRDM4        | 0.7264434                              | N                                            | 1                                      | N                                   |
| PRLR         | 0.7264434                              | N                                            | 65                                     | N                                   |
| TGFBR3       | 0.7264434                              | N                                            | 11                                     | N                                   |
| AC008592.3   | 0.72647231                             | N                                            | 0                                      | N                                   |
| RBM27        | 0.72647231                             | N                                            | 0                                      | N                                   |

| Gene symbols | FDR (differential expression analysis) | Differentially expressed gene? Y, Yes; N, No | Number of insulin related publications | Insulin related gene? Y, Yes; N, No |
|--------------|----------------------------------------|----------------------------------------------|----------------------------------------|-------------------------------------|
| DOK4         | 0.726562342                            | N                                            | 6                                      | N                                   |
| LIG3         | 0.726562342                            | N                                            | 1                                      | N                                   |
| RBFOX3       | 0.726562342                            | N                                            | 0                                      | N                                   |
| SELENOWP1    | 0.726562342                            | N                                            | 0                                      | N                                   |
| SEPT4        | 0.726583451                            | N                                            | 1                                      | N                                   |
| B4GALNT2     | 0.726583451                            | N                                            | 1                                      | N                                   |
| IDE          | 0.726583451                            | N                                            | 772                                    | Y                                   |
| KIAA0907     | 0.726606017                            | N                                            | 0                                      | N                                   |
| ATP10A       | 0.726717505                            | N                                            | 5                                      | N                                   |
| NDUFB5       | 0.726717505                            | N                                            | 3                                      | N                                   |
| ROR1         | 0.726737835                            | N                                            | 8                                      | N                                   |
| AC133528.2   | 0.726753812                            | N                                            | 0                                      | N                                   |
| ATG12        | 0.726753812                            | N                                            | 21                                     | N                                   |
| BASP1        | 0.726753812                            | N                                            | 0                                      | N                                   |
| KCTD17       | 0.726753812                            | N                                            | 1                                      | N                                   |
| ZBTB6        | 0.726757457                            | N                                            | 0                                      | N                                   |
| SPP2         | 0.726863728                            | N                                            | 1                                      | N                                   |
| RFWD2        | 0.726884501                            | N                                            | 1                                      | N                                   |
| DDX19B       | 0.726927349                            | N                                            | 0                                      | N                                   |
| RPA4         | 0.726927349                            | N                                            | 0                                      | N                                   |
| ASPCR1       | 0.726939989                            | N                                            | 11                                     | N                                   |
| TMEM251      | 0.726939989                            | N                                            | 0                                      | N                                   |
| FH           | 0.727034577                            | N                                            | 223                                    | Y                                   |
| AMDHD1       | 0.727129977                            | N                                            | 0                                      | N                                   |
| IFNAR2       | 0.727129977                            | N                                            | 4                                      | N                                   |
| PPIG         | 0.727129977                            | N                                            | 0                                      | N                                   |
| UBA7         | 0.727129977                            | N                                            | 0                                      | N                                   |
| VN1R80P      | 0.727129977                            | N                                            | 0                                      | N                                   |
| BMS1P8       | 0.727134534                            | N                                            | 0                                      | N                                   |
| AKR1C1       | 0.727141112                            | N                                            | 3                                      | N                                   |
| SDHA         | 0.727141112                            | N                                            | 16                                     | N                                   |
| AL359880.1   | 0.727235196                            | N                                            | 0                                      | N                                   |
| CAPN14       | 0.727235196                            | N                                            | 0                                      | N                                   |
| CYP1A2       | 0.727235196                            | N                                            | 43                                     | N                                   |
| DFNB59       | 0.727235196                            | N                                            | 0                                      | N                                   |
| RPL3P4       | 0.727235196                            | N                                            | 0                                      | N                                   |
| RPS15AP1     | 0.727235196                            | N                                            | 0                                      | N                                   |
| RUNX2        | 0.727235196                            | N                                            | 212                                    | Y                                   |
| ZNF521       | 0.727235196                            | N                                            | 1                                      | N                                   |
| FCFIP8       | 0.727315654                            | N                                            | 0                                      | N                                   |
| HLA-F-AS1    | 0.727315654                            | N                                            | 0                                      | N                                   |
| CDKL2        | 0.727373747                            | N                                            | 0                                      | N                                   |
| VPS11        | 0.727685323                            | N                                            | 0                                      | N                                   |
| ZNF266       | 0.727738402                            | N                                            | 0                                      | N                                   |
| BABAM1       | 0.727887352                            | N                                            | 0                                      | N                                   |
| AC092045.1   | 0.728027707                            | N                                            | 0                                      | N                                   |
| COL4A2       | 0.728355334                            | N                                            | 5                                      | N                                   |
| PLXNB1       | 0.728553846                            | N                                            | 3                                      | N                                   |
| TTC39B       | 0.728553846                            | N                                            | 0                                      | N                                   |
| LRRTM4       | 0.728816556                            | N                                            | 0                                      | N                                   |
| RNF31        | 0.728816556                            | N                                            | 0                                      | N                                   |
| MYADM        | 0.728819403                            | N                                            | 0                                      | N                                   |
| AC068446.2   | 0.728914962                            | N                                            | 0                                      | N                                   |
| AC079944.2   | 0.728928305                            | N                                            | 0                                      | N                                   |
| GDPD3        | 0.728930671                            | N                                            | 0                                      | N                                   |
| IGF2BP3      | 0.728930671                            | N                                            | 182                                    | Y                                   |
| PIGA         | 0.728930671                            | N                                            | 6                                      | N                                   |
| RAB26        | 0.728930671                            | N                                            | 1                                      | N                                   |
| SOGA3        | 0.728930671                            | N                                            | 0                                      | N                                   |
| CCNT2        | 0.728972107                            | N                                            | 0                                      | N                                   |
| PRKG2        | 0.728972107                            | N                                            | 2                                      | N                                   |
| AC117394.1   | 0.728986994                            | N                                            | 0                                      | N                                   |
| NUBP2        | 0.728986994                            | N                                            | 3                                      | N                                   |
| PCBP3        | 0.728986994                            | N                                            | 0                                      | N                                   |
| PRCC         | 0.728986994                            | N                                            | 252                                    | Y                                   |
| USP20        | 0.728986994                            | N                                            | 0                                      | N                                   |



| Gene symbols | FDR (differential expression analysis) | Differentially expressed gene? Y, Yes; N, No | Number of insulin related publications | Insulin related gene? Y, Yes; N, No |
|--------------|----------------------------------------|----------------------------------------------|----------------------------------------|-------------------------------------|
| AP000787.1   | 0.729028012                            | N                                            | 0                                      | N                                   |
| ERP29        | 0.729028012                            | N                                            | 7                                      | N                                   |
| MMP11        | 0.729028012                            | N                                            | 4                                      | N                                   |
| TNPO2        | 0.729028012                            | N                                            | 0                                      | N                                   |
| TSPYL4       | 0.729028012                            | N                                            | 0                                      | N                                   |
| CHD1L        | 0.72909893                             | N                                            | 0                                      | N                                   |
| ALDH5A1      | 0.729144284                            | N                                            | 1                                      | N                                   |
| CCT8P1       | 0.729144284                            | N                                            | 0                                      | N                                   |
| AC087500.2   | 0.72935595                             | N                                            | 0                                      | N                                   |
| AC139491.2   | 0.72935595                             | N                                            | 0                                      | N                                   |
| ZNF438       | 0.72935595                             | N                                            | 0                                      | N                                   |
| AL024507.2   | 0.729373818                            | N                                            | 0                                      | N                                   |
| CD82         | 0.729406373                            | N                                            | 2                                      | N                                   |
| SDHAF1       | 0.729406373                            | N                                            | 1                                      | N                                   |
| AL359697.1   | 0.729525245                            | N                                            | 0                                      | N                                   |
| AREL1        | 0.729525245                            | N                                            | 0                                      | N                                   |
| CFAP44       | 0.729525245                            | N                                            | 0                                      | N                                   |
| RAB18        | 0.729525245                            | N                                            | 4                                      | N                                   |
| AL390039.1   | 0.729557389                            | N                                            | 0                                      | N                                   |
| ZC3H18       | 0.729598329                            | N                                            | 0                                      | N                                   |
| TPH2         | 0.729624738                            | N                                            | 13                                     | N                                   |
| MRPL54       | 0.729753372                            | N                                            | 0                                      | N                                   |
| TLR10        | 0.729753372                            | N                                            | 2                                      | N                                   |
| AC092828.1   | 0.729772641                            | N                                            | 0                                      | N                                   |
| CAVIN2       | 0.729772641                            | N                                            | 2                                      | N                                   |
| PI4K2B       | 0.729903259                            | N                                            | 0                                      | N                                   |
| RAB31        | 0.729903259                            | N                                            | 5                                      | N                                   |
| EXD1         | 0.72995457                             | N                                            | 0                                      | N                                   |
| IGSF10       | 0.72995457                             | N                                            | 1                                      | N                                   |
| MYB          | 0.72995457                             | N                                            | 52                                     | N                                   |
| SAMD1        | 0.72995457                             | N                                            | 0                                      | N                                   |
| AC024575.1   | 0.730134152                            | N                                            | 0                                      | N                                   |
| ACTR8        | 0.730134152                            | N                                            | 0                                      | N                                   |
| AL355472.2   | 0.730134152                            | N                                            | 0                                      | N                                   |
| CCNK         | 0.730134152                            | N                                            | 0                                      | N                                   |
| LMBR1        | 0.730134152                            | N                                            | 1                                      | N                                   |
| MPHOSPH6     | 0.730134152                            | N                                            | 0                                      | N                                   |
| TMEM30B      | 0.730134152                            | N                                            | 0                                      | N                                   |
| EN2          | 0.730217574                            | N                                            | 4                                      | N                                   |
| PLA2G6       | 0.730217574                            | N                                            | 31                                     | N                                   |
| AC064836.3   | 0.730233328                            | N                                            | 0                                      | N                                   |
| MED29        | 0.730233328                            | N                                            | 0                                      | N                                   |
| ICAM3        | 0.730383382                            | N                                            | 2                                      | N                                   |
| AC024560.2   | 0.730505678                            | N                                            | 0                                      | N                                   |
| C1orf159     | 0.730505678                            | N                                            | 0                                      | N                                   |
| AC026691.1   | 0.730524778                            | N                                            | 0                                      | N                                   |
| AC027644.3   | 0.730524778                            | N                                            | 0                                      | N                                   |
| AC099521.2   | 0.730524778                            | N                                            | 0                                      | N                                   |
| AGPAT1       | 0.730524778                            | N                                            | 6                                      | N                                   |
| ATP1B1P1     | 0.730524778                            | N                                            | 0                                      | N                                   |
| B4GALNT4     | 0.730524778                            | N                                            | 0                                      | N                                   |
| ENTPD6       | 0.730524778                            | N                                            | 1                                      | N                                   |
| SSTR3        | 0.730524778                            | N                                            | 35                                     | N                                   |
| Z94721.1     | 0.730524778                            | N                                            | 0                                      | N                                   |
| AC009487.2   | 0.730613223                            | N                                            | 0                                      | N                                   |
| SLC17A8      | 0.730613223                            | N                                            | 1                                      | N                                   |
| SNHG4        | 0.730613223                            | N                                            | 0                                      | N                                   |
| SNHG7        | 0.730613223                            | N                                            | 0                                      | N                                   |
| TCEAL1       | 0.730613223                            | N                                            | 0                                      | N                                   |
| ZNF41        | 0.730613223                            | N                                            | 0                                      | N                                   |
| ID12-AS1     | 0.73070496                             | N                                            | 0                                      | N                                   |
| IKZF4        | 0.73070496                             | N                                            | 4                                      | N                                   |
| NOTCH4       | 0.73070496                             | N                                            | 5                                      | N                                   |
| RN7SL92P     | 0.73070496                             | N                                            | 0                                      | N                                   |
| SH3RF1       | 0.73070496                             | N                                            | 0                                      | N                                   |
| ST20         | 0.73070496                             | N                                            | 0                                      | N                                   |

| Gene symbols | FDR (differential expression analysis) | Differentially expressed gene? Y, Yes; N, No | Number of insulin related publications | Insulin related gene? Y, Yes; N, No |
|--------------|----------------------------------------|----------------------------------------------|----------------------------------------|-------------------------------------|
| YARS         | 0.73070496                             | N                                            | 1                                      | N                                   |
| EVI5L        | 0.730712419                            | N                                            | 0                                      | N                                   |
| GBP5         | 0.730712419                            | N                                            | 3                                      | N                                   |
| RAB3A        | 0.730712419                            | N                                            | 47                                     | N                                   |
| RP11-465K1.2 | 0.730783824                            | N                                            | 0                                      | N                                   |
| AC053503.5   | 0.73083649                             | N                                            | 0                                      | N                                   |
| MPRIPP1      | 0.73083649                             | N                                            | 0                                      | N                                   |
| DAB1         | 0.730839218                            | N                                            | 3                                      | N                                   |
| C15orf48     | 0.730872813                            | N                                            | 0                                      | N                                   |
| KCTD6        | 0.730872813                            | N                                            | 0                                      | N                                   |
| TRIAP1       | 0.730877863                            | N                                            | 0                                      | N                                   |
| ARG2         | 0.730935438                            | N                                            | 13                                     | N                                   |
| MC1R         | 0.730947347                            | N                                            | 5                                      | N                                   |
| UCP2         | 0.731028538                            | N                                            | 500                                    | Y                                   |
| RPL7AP8      | 0.731053449                            | N                                            | 0                                      | N                                   |
| HBEGF        | 0.73134798                             | N                                            | 51                                     | N                                   |
| ZFYVE16      | 0.73134798                             | N                                            | 0                                      | N                                   |
| CACNA2D3     | 0.731443103                            | N                                            | 2                                      | N                                   |
| ABCA3        | 0.731478036                            | N                                            | 1                                      | N                                   |
| AC004980.2   | 0.731478036                            | N                                            | 0                                      | N                                   |
| AC010531.4   | 0.731478036                            | N                                            | 0                                      | N                                   |
| AC093525.8   | 0.731478036                            | N                                            | 0                                      | N                                   |
| AC144450.1   | 0.731478036                            | N                                            | 0                                      | N                                   |
| AL356276.2   | 0.731478036                            | N                                            | 0                                      | N                                   |
| ATP8B2       | 0.731478036                            | N                                            | 1                                      | N                                   |
| C1QTNF12     | 0.731478036                            | N                                            | 8                                      | N                                   |
| CELP         | 0.731478036                            | N                                            | 0                                      | N                                   |
| CMAS         | 0.731478036                            | N                                            | 3                                      | N                                   |
| CNR1         | 0.731478036                            | N                                            | 45                                     | N                                   |
| CNTLN        | 0.731478036                            | N                                            | 0                                      | N                                   |
| CUL2         | 0.731478036                            | N                                            | 0                                      | N                                   |
| FCER1G       | 0.731478036                            | N                                            | 2                                      | N                                   |
| IFIT1        | 0.731478036                            | N                                            | 1                                      | N                                   |
| LIAS         | 0.731478036                            | N                                            | 3                                      | N                                   |
| MAMSTR       | 0.731478036                            | N                                            | 1                                      | N                                   |
| PBX3         | 0.731478036                            | N                                            | 1                                      | N                                   |
| RSRC2        | 0.731478036                            | N                                            | 0                                      | N                                   |
| SLC25A15     | 0.731478036                            | N                                            | 0                                      | N                                   |
| SPATA18      | 0.731478036                            | N                                            | 0                                      | N                                   |
| SRSF5        | 0.731478036                            | N                                            | 0                                      | N                                   |
| TOMM70       | 0.731478036                            | N                                            | 0                                      | N                                   |
| TRIB2        | 0.731478036                            | N                                            | 1                                      | N                                   |
| Z82195.2     | 0.731478036                            | N                                            | 0                                      | N                                   |
| ZNF593       | 0.731478036                            | N                                            | 0                                      | N                                   |
| ZNF800       | 0.731478036                            | N                                            | 0                                      | N                                   |
| FGFR3        | 0.731569439                            | N                                            | 50                                     | N                                   |
| GBE1         | 0.731569439                            | N                                            | 2                                      | N                                   |
| PADI1        | 0.731569439                            | N                                            | 0                                      | N                                   |
| FZD10-AS1    | 0.731585879                            | N                                            | 0                                      | N                                   |
| SCN4A        | 0.731585879                            | N                                            | 5                                      | N                                   |
| AC007191.1   | 0.731660775                            | N                                            | 0                                      | N                                   |
| AC135178.2   | 0.731660775                            | N                                            | 0                                      | N                                   |
| AL137058.3   | 0.731660775                            | N                                            | 0                                      | N                                   |
| DTL          | 0.731660775                            | N                                            | 2                                      | N                                   |
| ERMARD       | 0.731660775                            | N                                            | 0                                      | N                                   |
| HILS1        | 0.731660775                            | N                                            | 1                                      | N                                   |
| IPPK         | 0.731660775                            | N                                            | 0                                      | N                                   |
| PRDX2P4      | 0.731660775                            | N                                            | 0                                      | N                                   |
| SMTN         | 0.731660775                            | N                                            | 0                                      | N                                   |
| TCTA         | 0.731660775                            | N                                            | 0                                      | N                                   |
| TTC9         | 0.731660775                            | N                                            | 0                                      | N                                   |
| AC007570.1   | 0.731844129                            | N                                            | 0                                      | N                                   |
| ZNF358       | 0.731849533                            | N                                            | 0                                      | N                                   |
| ABCG4        | 0.731951719                            | N                                            | 4                                      | N                                   |
| PRMT9        | 0.731961914                            | N                                            | 0                                      | N                                   |
| HNRNPKP3     | 0.732000228                            | N                                            | 0                                      | N                                   |

| Gene symbols | FDR (differential expression analysis) | Differentially expressed gene? Y, Yes; N, No | Number of insulin related publications | Insulin related gene? Y, Yes; N, No |
|--------------|----------------------------------------|----------------------------------------------|----------------------------------------|-------------------------------------|
| KRASP1       | 0.732100864                            | N                                            | 0                                      | N                                   |
| ATP6V1G1P4   | 0.732465274                            | N                                            | 0                                      | N                                   |
| AC020978.10  | 0.732782441                            | N                                            | 0                                      | N                                   |
| BTN2A1       | 0.732782441                            | N                                            | 0                                      | N                                   |
| POLR1B       | 0.732782441                            | N                                            | 0                                      | N                                   |
| MOV10        | 0.732805044                            | N                                            | 0                                      | N                                   |
| SSBP1        | 0.732868525                            | N                                            | 0                                      | N                                   |
| AL133284.1   | 0.732907347                            | N                                            | 0                                      | N                                   |
| LSM8         | 0.732907347                            | N                                            | 1                                      | N                                   |
| MAP2K4P1     | 0.732907347                            | N                                            | 0                                      | N                                   |
| MRPL47       | 0.732907347                            | N                                            | 0                                      | N                                   |
| SCG3         | 0.732907347                            | N                                            | 2                                      | N                                   |
| AL391840.1   | 0.732935799                            | N                                            | 0                                      | N                                   |
| LOXL1        | 0.732935799                            | N                                            | 2                                      | N                                   |
| TDG          | 0.732935799                            | N                                            | 4                                      | N                                   |
| SRSF11       | 0.732935814                            | N                                            | 0                                      | N                                   |
| CD93         | 0.733158323                            | N                                            | 2                                      | N                                   |
| VPS37C       | 0.733158323                            | N                                            | 0                                      | N                                   |
| AP3B1        | 0.733226214                            | N                                            | 0                                      | N                                   |
| MIATNB       | 0.733489328                            | N                                            | 0                                      | N                                   |
| CRADD        | 0.733561119                            | N                                            | 1                                      | N                                   |
| AC005614.1   | 0.733651025                            | N                                            | 0                                      | N                                   |
| ASTE1        | 0.733651025                            | N                                            | 0                                      | N                                   |
| PEA15        | 0.733852884                            | N                                            | 24                                     | N                                   |
| ZNF526       | 0.733964944                            | N                                            | 0                                      | N                                   |
| AL391056.1   | 0.734054443                            | N                                            | 0                                      | N                                   |
| KCTD21       | 0.734054443                            | N                                            | 0                                      | N                                   |
| AC007395.1   | 0.734060179                            | N                                            | 0                                      | N                                   |
| AC011290.2   | 0.734060179                            | N                                            | 0                                      | N                                   |
| AC079610.2   | 0.734060179                            | N                                            | 0                                      | N                                   |
| AC090877.1   | 0.734060179                            | N                                            | 0                                      | N                                   |
| AC092324.1   | 0.734060179                            | N                                            | 0                                      | N                                   |
| AC093510.1   | 0.734060179                            | N                                            | 0                                      | N                                   |
| AC122713.1   | 0.734060179                            | N                                            | 0                                      | N                                   |
| AL049792.1   | 0.734060179                            | N                                            | 0                                      | N                                   |
| AL110118.1   | 0.734060179                            | N                                            | 0                                      | N                                   |
| AL117328.2   | 0.734060179                            | N                                            | 0                                      | N                                   |
| APRT         | 0.734060179                            | N                                            | 5                                      | N                                   |
| CIITA        | 0.734060179                            | N                                            | 5                                      | N                                   |
| CLIP3        | 0.734060179                            | N                                            | 1                                      | N                                   |
| CMTR2        | 0.734060179                            | N                                            | 0                                      | N                                   |
| COX7A1       | 0.734060179                            | N                                            | 8                                      | N                                   |
| CU638689.5   | 0.734060179                            | N                                            | 0                                      | N                                   |
| CYP7B1       | 0.734060179                            | N                                            | 19                                     | N                                   |
| EIF1AD       | 0.734060179                            | N                                            | 0                                      | N                                   |
| ESPNL        | 0.734060179                            | N                                            | 0                                      | N                                   |
| FGD5P1       | 0.734060179                            | N                                            | 0                                      | N                                   |
| FHOD1        | 0.734060179                            | N                                            | 1                                      | N                                   |
| FTSJ1        | 0.734060179                            | N                                            | 0                                      | N                                   |
| LINC00092    | 0.734060179                            | N                                            | 0                                      | N                                   |
| LRPAP1       | 0.734060179                            | N                                            | 3                                      | N                                   |
| LRRC24       | 0.734060179                            | N                                            | 0                                      | N                                   |
| LRRC74B      | 0.734060179                            | N                                            | 0                                      | N                                   |
| PDLIM4       | 0.734060179                            | N                                            | 0                                      | N                                   |
| PSTK         | 0.734060179                            | N                                            | 0                                      | N                                   |
| RPEP1        | 0.734060179                            | N                                            | 0                                      | N                                   |
| RPS13        | 0.734060179                            | N                                            | 1                                      | N                                   |
| RSL24D1P11   | 0.734060179                            | N                                            | 0                                      | N                                   |
| SDCBP2       | 0.734060179                            | N                                            | 0                                      | N                                   |
| SNORA73B     | 0.734060179                            | N                                            | 0                                      | N                                   |
| SPANXA2-OT1  | 0.734060179                            | N                                            | 0                                      | N                                   |
| STAC3        | 0.734060179                            | N                                            | 1                                      | N                                   |
| SYPL1        | 0.734060179                            | N                                            | 2                                      | N                                   |
| TMEM200B     | 0.734060179                            | N                                            | 0                                      | N                                   |
| TMEM242      | 0.734060179                            | N                                            | 0                                      | N                                   |
| Z83844.1     | 0.734060179                            | N                                            | 0                                      | N                                   |

| Gene symbols | FDR (differential expression analysis) | Differentially expressed gene? Y, Yes; N, No | Number of insulin related publications | Insulin related gene? Y, Yes; N, No |
|--------------|----------------------------------------|----------------------------------------------|----------------------------------------|-------------------------------------|
| ZNF252P      | 0.734060179                            | N                                            | 0                                      | N                                   |
| AC021945.1   | 0.734316362                            | N                                            | 0                                      | N                                   |
| ADGRA1       | 0.734316362                            | N                                            | 0                                      | N                                   |
| CASP2        | 0.734316362                            | N                                            | 6                                      | N                                   |
| EIF3D        | 0.734316362                            | N                                            | 0                                      | N                                   |
| EXOC3-AS1    | 0.734316362                            | N                                            | 0                                      | N                                   |
| FZD2         | 0.734316362                            | N                                            | 2                                      | N                                   |
| GPAT4        | 0.734316362                            | N                                            | 11                                     | N                                   |
| GSDMC        | 0.734316362                            | N                                            | 0                                      | N                                   |
| LINC02556    | 0.734316362                            | N                                            | 0                                      | N                                   |
| NAT1         | 0.734316362                            | N                                            | 4                                      | N                                   |
| TOM1L1       | 0.734316362                            | N                                            | 0                                      | N                                   |
| HMG2P5       | 0.734369003                            | N                                            | 0                                      | N                                   |
| AC044802.1   | 0.734413113                            | N                                            | 0                                      | N                                   |
| AC109635.6   | 0.734413113                            | N                                            | 0                                      | N                                   |
| B3GNT8       | 0.734413113                            | N                                            | 0                                      | N                                   |
| C12orf56     | 0.734413113                            | N                                            | 0                                      | N                                   |
| CWC22        | 0.734413113                            | N                                            | 1                                      | N                                   |
| ECD          | 0.734413113                            | N                                            | 63                                     | N                                   |
| GCLM         | 0.734413113                            | N                                            | 11                                     | N                                   |
| HFE          | 0.734413113                            | N                                            | 93                                     | N                                   |
| NAPB         | 0.734413113                            | N                                            | 3                                      | N                                   |
| NECTIN1      | 0.734413113                            | N                                            | 0                                      | N                                   |
| PRDX2        | 0.734413113                            | N                                            | 6                                      | N                                   |
| LRRC2-AS1    | 0.734425538                            | N                                            | 0                                      | N                                   |
| AC138430.1   | 0.734441862                            | N                                            | 0                                      | N                                   |
| BCORL1       | 0.734441862                            | N                                            | 0                                      | N                                   |
| GEMIN2P2     | 0.734441862                            | N                                            | 0                                      | N                                   |
| MCF2L        | 0.734441862                            | N                                            | 0                                      | N                                   |
| NOL6         | 0.734441862                            | N                                            | 0                                      | N                                   |
| PPIL3        | 0.734441862                            | N                                            | 0                                      | N                                   |
| TPPP3        | 0.734441862                            | N                                            | 0                                      | N                                   |
| ZNF675       | 0.73464133                             | N                                            | 0                                      | N                                   |
| HOXA13       | 0.73470653                             | N                                            | 3                                      | N                                   |
| RPSAP36      | 0.734800472                            | N                                            | 0                                      | N                                   |
| ZNF300       | 0.734800472                            | N                                            | 0                                      | N                                   |
| AC010931.2   | 0.734831911                            | N                                            | 0                                      | N                                   |
| ADTRP        | 0.734831911                            | N                                            | 0                                      | N                                   |
| AP002026.1   | 0.734831911                            | N                                            | 0                                      | N                                   |
| FEM1B        | 0.734831911                            | N                                            | 2                                      | N                                   |
| HYAL3        | 0.734831911                            | N                                            | 0                                      | N                                   |
| LRRC75B      | 0.734831911                            | N                                            | 0                                      | N                                   |
| MB21D2       | 0.734831911                            | N                                            | 0                                      | N                                   |
| Metazoa_SRP  | 0.734831911                            | N                                            | 0                                      | N                                   |
| OLFM5P       | 0.734831911                            | N                                            | 0                                      | N                                   |
| RGS4         | 0.734831911                            | N                                            | 14                                     | N                                   |
| RPUSD3       | 0.734831911                            | N                                            | 0                                      | N                                   |
| STXBP5L      | 0.734831911                            | N                                            | 2                                      | N                                   |
| SYNM         | 0.734831911                            | N                                            | 0                                      | N                                   |
| VAX1         | 0.734831911                            | N                                            | 1                                      | N                                   |
| ZNF213-AS1   | 0.734831911                            | N                                            | 0                                      | N                                   |
| AC069307.1   | 0.734833264                            | N                                            | 0                                      | N                                   |
| EIF6         | 0.734833264                            | N                                            | 8                                      | N                                   |
| LINC01117    | 0.734833264                            | N                                            | 0                                      | N                                   |
| LINC01460    | 0.734833264                            | N                                            | 0                                      | N                                   |
| LIX1-AS1     | 0.734833264                            | N                                            | 0                                      | N                                   |
| TCF7L1-IT1   | 0.734833264                            | N                                            | 0                                      | N                                   |
| ZBTB80S      | 0.734833264                            | N                                            | 0                                      | N                                   |
| AC040169.3   | 0.734879338                            | N                                            | 0                                      | N                                   |
| AC097662.1   | 0.734879338                            | N                                            | 0                                      | N                                   |
| AC138894.2   | 0.734879338                            | N                                            | 0                                      | N                                   |
| ATO8         | 0.734879338                            | N                                            | 1                                      | N                                   |
| SLC9A4       | 0.734879338                            | N                                            | 0                                      | N                                   |
| SP3P         | 0.734976123                            | N                                            | 0                                      | N                                   |
| AS3MT        | 0.735008573                            | N                                            | 3                                      | N                                   |
| HSPA6        | 0.735008573                            | N                                            | 0                                      | N                                   |

| Gene symbols | FDR (differential expression analysis) | Differentially expressed gene? Y, Yes; N, No | Number of insulin related publications | Insulin related gene? Y, Yes; N, No |
|--------------|----------------------------------------|----------------------------------------------|----------------------------------------|-------------------------------------|
| PDSS1P1      | 0.735008573                            | N                                            | 0                                      | N                                   |
| KCTD2        | 0.735101486                            | N                                            | 0                                      | N                                   |
| TNFRSF10C    | 0.735101486                            | N                                            | 1                                      | N                                   |
| AL353708.3   | 0.73539407                             | N                                            | 0                                      | N                                   |
| FAHD2B       | 0.735431984                            | N                                            | 0                                      | N                                   |
| FKBP10       | 0.735666429                            | N                                            | 0                                      | N                                   |
| DMAP1        | 0.735711908                            | N                                            | 0                                      | N                                   |
| HHIPL2       | 0.735711908                            | N                                            | 0                                      | N                                   |
| KLK11        | 0.735711908                            | N                                            | 1                                      | N                                   |
| PGR          | 0.735711908                            | N                                            | 76                                     | N                                   |
| SPP1         | 0.735711908                            | N                                            | 100                                    | N                                   |
| AC010478.1   | 0.735803355                            | N                                            | 0                                      | N                                   |
| BX119904.1   | 0.735803355                            | N                                            | 0                                      | N                                   |
| SLC16A1-AS1  | 0.735803355                            | N                                            | 0                                      | N                                   |
| ZNF362       | 0.735803355                            | N                                            | 0                                      | N                                   |
| AP005263.1   | 0.73590284                             | N                                            | 0                                      | N                                   |
| NIPSNAP1     | 0.73590284                             | N                                            | 0                                      | N                                   |
| AC092171.4   | 0.735969722                            | N                                            | 0                                      | N                                   |
| ARMCX6       | 0.735969722                            | N                                            | 0                                      | N                                   |
| CFL2         | 0.735969722                            | N                                            | 1                                      | N                                   |
| GRAMD1C      | 0.735969722                            | N                                            | 0                                      | N                                   |
| AL929302.1   | 0.736311717                            | N                                            | 0                                      | N                                   |
| MRPL55       | 0.736311717                            | N                                            | 0                                      | N                                   |
| RN7SKP185    | 0.736338861                            | N                                            | 0                                      | N                                   |
| MECR         | 0.736353685                            | N                                            | 0                                      | N                                   |
| AL450063.1   | 0.736483021                            | N                                            | 0                                      | N                                   |
| CDIPT        | 0.736483021                            | N                                            | 2                                      | N                                   |
| GNPTAB       | 0.736483021                            | N                                            | 0                                      | N                                   |
| GTF3C6       | 0.736483021                            | N                                            | 0                                      | N                                   |
| IBTK         | 0.736483021                            | N                                            | 0                                      | N                                   |
| PNPLA7       | 0.736483021                            | N                                            | 2                                      | N                                   |
| RN7SKP255    | 0.736483021                            | N                                            | 0                                      | N                                   |
| RPL12P25     | 0.736483021                            | N                                            | 0                                      | N                                   |
| RPL35P2      | 0.736483021                            | N                                            | 0                                      | N                                   |
| TBL1XR1      | 0.736483021                            | N                                            | 2                                      | N                                   |
| TMEM161A     | 0.736483021                            | N                                            | 1                                      | N                                   |
| SP3          | 0.73648625                             | N                                            | 51                                     | N                                   |
| PRKG1        | 0.736500109                            | N                                            | 9                                      | N                                   |
| GALNT6       | 0.736646514                            | N                                            | 0                                      | N                                   |
| OSTF1        | 0.736646514                            | N                                            | 2                                      | N                                   |
| AC083801.2   | 0.736698972                            | N                                            | 0                                      | N                                   |
| KIAA1468     | 0.736752933                            | N                                            | 0                                      | N                                   |
| PEX19        | 0.736755641                            | N                                            | 0                                      | N                                   |
| SNORA74D     | 0.736864087                            | N                                            | 0                                      | N                                   |
| AC131888.1   | 0.737046476                            | N                                            | 0                                      | N                                   |
| PMPCAP1      | 0.737053837                            | N                                            | 0                                      | N                                   |
| AL049794.1   | 0.737062172                            | N                                            | 0                                      | N                                   |
| NPIP15       | 0.737062172                            | N                                            | 0                                      | N                                   |
| AC023055.1   | 0.737141709                            | N                                            | 0                                      | N                                   |
| AC091132.1   | 0.737141709                            | N                                            | 0                                      | N                                   |
| DGCR11       | 0.737141709                            | N                                            | 0                                      | N                                   |
| LYRM7        | 0.737141709                            | N                                            | 0                                      | N                                   |
| NDUFS4       | 0.737179163                            | N                                            | 1                                      | N                                   |
| AC087897.1   | 0.73723595                             | N                                            | 0                                      | N                                   |
| SPATA6L      | 0.737261538                            | N                                            | 0                                      | N                                   |
| STEAP1       | 0.737353838                            | N                                            | 0                                      | N                                   |
| MAP7D2       | 0.737535154                            | N                                            | 0                                      | N                                   |
| AC084854.1   | 0.737636844                            | N                                            | 0                                      | N                                   |
| NCAN         | 0.737636844                            | N                                            | 9                                      | N                                   |
| RN7SL577P    | 0.737636844                            | N                                            | 0                                      | N                                   |
| AC027613.1   | 0.737664532                            | N                                            | 0                                      | N                                   |
| AL137025.1   | 0.737664532                            | N                                            | 0                                      | N                                   |
| ZNF85        | 0.737823545                            | N                                            | 0                                      | N                                   |
| MUC6         | 0.738273264                            | N                                            | 8                                      | N                                   |
| IL24         | 0.738614902                            | N                                            | 3                                      | N                                   |
| GS1-124K5.4  | 0.738678879                            | N                                            | 0                                      | N                                   |

| Gene symbols | FDR (differential expression analysis) | Differentially expressed gene? Y, Yes; N, No | Number of insulin related publications | Insulin related gene? Y, Yes; N, No |
|--------------|----------------------------------------|----------------------------------------------|----------------------------------------|-------------------------------------|
| FAM35CP      | 0.738693441                            | N                                            | 0                                      | N                                   |
| FAM186A      | 0.738702401                            | N                                            | 0                                      | N                                   |
| SLX4         | 0.738702401                            | N                                            | 0                                      | N                                   |
| ZBTB20       | 0.738702401                            | N                                            | 3                                      | N                                   |
| DNALI1       | 0.738801935                            | N                                            | 0                                      | N                                   |
| INSM1        | 0.738801935                            | N                                            | 20                                     | N                                   |
| MRRFP1       | 0.738801935                            | N                                            | 0                                      | N                                   |
| AC027682.6   | 0.738989479                            | N                                            | 0                                      | N                                   |
| AL359551.1   | 0.738989479                            | N                                            | 0                                      | N                                   |
| FAM216B      | 0.738989479                            | N                                            | 0                                      | N                                   |
| GPRC5B       | 0.738989479                            | N                                            | 4                                      | N                                   |
| OPRM1        | 0.738989479                            | N                                            | 5                                      | N                                   |
| PGM3         | 0.738989479                            | N                                            | 0                                      | N                                   |
| UG0898H09    | 0.738989479                            | N                                            | 0                                      | N                                   |
| AL031282.1   | 0.739207557                            | N                                            | 0                                      | N                                   |
| FBXW2        | 0.739207557                            | N                                            | 0                                      | N                                   |
| PAPOLB       | 0.739207557                            | N                                            | 1                                      | N                                   |
| AC010809.2   | 0.739287223                            | N                                            | 0                                      | N                                   |
| PAQR7        | 0.739287223                            | N                                            | 3                                      | N                                   |
| CDK8         | 0.739478603                            | N                                            | 9                                      | N                                   |
| MCTS1        | 0.739478603                            | N                                            | 2                                      | N                                   |
| USP10        | 0.739478603                            | N                                            | 3                                      | N                                   |
| AC046176.1   | 0.739535293                            | N                                            | 0                                      | N                                   |
| AC078802.1   | 0.739535293                            | N                                            | 0                                      | N                                   |
| CAPRIN1      | 0.739584585                            | N                                            | 1                                      | N                                   |
| CRYM-AS1     | 0.739712102                            | N                                            | 0                                      | N                                   |
| PDLIM1       | 0.739712102                            | N                                            | 0                                      | N                                   |
| PDLIM7       | 0.739712102                            | N                                            | 7                                      | N                                   |
| AC023632.6   | 0.739815862                            | N                                            | 0                                      | N                                   |
| AP000894.1   | 0.739815862                            | N                                            | 0                                      | N                                   |
| GRIN1        | 0.739815862                            | N                                            | 0                                      | N                                   |
| OR52T1P      | 0.739815862                            | N                                            | 0                                      | N                                   |
| SNX18P7      | 0.739815862                            | N                                            | 0                                      | N                                   |
| EIF1         | 0.739882184                            | N                                            | 0                                      | N                                   |
| GOSR2        | 0.739882184                            | N                                            | 0                                      | N                                   |
| MIR181A1HG   | 0.739882184                            | N                                            | 0                                      | N                                   |
| MRPS16P1     | 0.739882184                            | N                                            | 0                                      | N                                   |
| QTRT1        | 0.739882184                            | N                                            | 0                                      | N                                   |
| AC115284.1   | 0.73993194                             | N                                            | 0                                      | N                                   |
| LINC01152    | 0.73998821                             | N                                            | 0                                      | N                                   |
| TIGD3        | 0.73998821                             | N                                            | 0                                      | N                                   |
| AP001437.1   | 0.74004613                             | N                                            | 0                                      | N                                   |
| NIFKP4       | 0.74004613                             | N                                            | 0                                      | N                                   |
| ZNF70        | 0.74004613                             | N                                            | 0                                      | N                                   |
| GCK          | 0.740114771                            | N                                            | 475                                    | Y                                   |
| AC024941.2   | 0.740160008                            | N                                            | 0                                      | N                                   |
| CHSY1        | 0.740188729                            | N                                            | 1                                      | N                                   |
| GALNT15      | 0.740188729                            | N                                            | 0                                      | N                                   |
| OR6A2        | 0.740188729                            | N                                            | 0                                      | N                                   |
| SRPX         | 0.740188729                            | N                                            | 0                                      | N                                   |
| ATG2A        | 0.740270271                            | N                                            | 0                                      | N                                   |
| LINC00982    | 0.74060411                             | N                                            | 0                                      | N                                   |
| AL118558.1   | 0.74064397                             | N                                            | 0                                      | N                                   |
| RBBP5        | 0.74064397                             | N                                            | 1                                      | N                                   |
| SPIRE2       | 0.74064397                             | N                                            | 0                                      | N                                   |
| SRP14        | 0.74064397                             | N                                            | 0                                      | N                                   |
| AC007663.3   | 0.741005971                            | N                                            | 0                                      | N                                   |
| PARK7        | 0.741005971                            | N                                            | 17                                     | N                                   |
| AL450489.1   | 0.741010594                            | N                                            | 0                                      | N                                   |
| QDPR         | 0.741010594                            | N                                            | 1                                      | N                                   |
| CCAR1        | 0.741220055                            | N                                            | 1                                      | N                                   |
| RTN2         | 0.74139059                             | N                                            | 1                                      | N                                   |
| SLC9B2       | 0.74139059                             | N                                            | 1                                      | N                                   |
| AGPAT4-IT1   | 0.741536805                            | N                                            | 0                                      | N                                   |
| ATP5S        | 0.741536805                            | N                                            | 0                                      | N                                   |
| C22orf23     | 0.741536805                            | N                                            | 0                                      | N                                   |

| Gene symbols | FDR (differential expression analysis) | Differentially expressed gene? Y, Yes; N, No | Number of insulin related publications | Insulin related gene? Y, Yes; N, No |
|--------------|----------------------------------------|----------------------------------------------|----------------------------------------|-------------------------------------|
| NT5C         | 0.741536805                            | N                                            | 2                                      | N                                   |
| ONECUT1      | 0.741536805                            | N                                            | 26                                     | N                                   |
| SREBF1       | 0.741536805                            | N                                            | 598                                    | Y                                   |
| SS18L2P1     | 0.741536805                            | N                                            | 0                                      | N                                   |
| DPP9         | 0.741619109                            | N                                            | 13                                     | N                                   |
| CCNH         | 0.741755251                            | N                                            | 1                                      | N                                   |
| CCDC158      | 0.741840602                            | N                                            | 0                                      | N                                   |
| RPL26P30     | 0.741944565                            | N                                            | 0                                      | N                                   |
| TMEM53       | 0.741944565                            | N                                            | 0                                      | N                                   |
| BTF3P6       | 0.741980344                            | N                                            | 0                                      | N                                   |
| N4BP1        | 0.74200173                             | N                                            | 0                                      | N                                   |
| AC007780.1   | 0.742003761                            | N                                            | 0                                      | N                                   |
| AC009133.3   | 0.742003761                            | N                                            | 0                                      | N                                   |
| AC109460.1   | 0.742003761                            | N                                            | 0                                      | N                                   |
| AC124068.2   | 0.742003761                            | N                                            | 0                                      | N                                   |
| BTF3L4P1     | 0.742003761                            | N                                            | 0                                      | N                                   |
| CLDN11       | 0.742003761                            | N                                            | 3                                      | N                                   |
| GSDMD        | 0.742003761                            | N                                            | 0                                      | N                                   |
| LHX5         | 0.742003761                            | N                                            | 4                                      | N                                   |
| MICALL2      | 0.742003761                            | N                                            | 0                                      | N                                   |
| PECR         | 0.742003761                            | N                                            | 1                                      | N                                   |
| PKNOX1       | 0.742003761                            | N                                            | 14                                     | N                                   |
| RN7SL552P    | 0.742003761                            | N                                            | 0                                      | N                                   |
| RNF138       | 0.742003761                            | N                                            | 0                                      | N                                   |
| RP11-65I12.1 | 0.742003761                            | N                                            | 0                                      | N                                   |
| SLC22A1      | 0.742003761                            | N                                            | 11                                     | N                                   |
| SLC25A53     | 0.742003761                            | N                                            | 0                                      | N                                   |
| SLC4A1AP     | 0.742003761                            | N                                            | 0                                      | N                                   |
| SNX27        | 0.742003761                            | N                                            | 1                                      | N                                   |
| TDGP1        | 0.742003761                            | N                                            | 0                                      | N                                   |
| TINAGL1      | 0.742003761                            | N                                            | 0                                      | N                                   |
| TRMT1        | 0.742003761                            | N                                            | 0                                      | N                                   |
| YWHAZP6      | 0.742003761                            | N                                            | 0                                      | N                                   |
| ZNF268       | 0.742003761                            | N                                            | 0                                      | N                                   |
| AP002847.1   | 0.74209835                             | N                                            | 0                                      | N                                   |
| AC116407.3   | 0.742117571                            | N                                            | 0                                      | N                                   |
| MBP          | 0.74216483                             | N                                            | 196                                    | Y                                   |
| ASCC3        | 0.742208897                            | N                                            | 0                                      | N                                   |
| AC105206.1   | 0.742241222                            | N                                            | 0                                      | N                                   |
| SOX13        | 0.742241222                            | N                                            | 4                                      | N                                   |
| AC069366.1   | 0.742426032                            | N                                            | 0                                      | N                                   |
| AC106872.5   | 0.742426032                            | N                                            | 0                                      | N                                   |
| AL160291.1   | 0.742426032                            | N                                            | 0                                      | N                                   |
| COPS7B       | 0.742426032                            | N                                            | 0                                      | N                                   |
| LINC01024    | 0.742426032                            | N                                            | 0                                      | N                                   |
| MYO18B       | 0.742426032                            | N                                            | 1                                      | N                                   |
| RBM42        | 0.742426032                            | N                                            | 0                                      | N                                   |
| AL031673.1   | 0.742501674                            | N                                            | 0                                      | N                                   |
| JARID2       | 0.742517153                            | N                                            | 2                                      | N                                   |
| NOP10        | 0.742561504                            | N                                            | 0                                      | N                                   |
| SCN1A        | 0.742561504                            | N                                            | 2                                      | N                                   |
| RBM38        | 0.742578773                            | N                                            | 0                                      | N                                   |
| AC112220.2   | 0.742639781                            | N                                            | 0                                      | N                                   |
| AL162274.3   | 0.742639781                            | N                                            | 0                                      | N                                   |
| RPL17P10     | 0.742639781                            | N                                            | 0                                      | N                                   |
| ZMAT5        | 0.742712824                            | N                                            | 0                                      | N                                   |
| AP005205.3   | 0.742829663                            | N                                            | 0                                      | N                                   |
| AC004223.2   | 0.742871843                            | N                                            | 0                                      | N                                   |
| AC104184.1   | 0.742871843                            | N                                            | 0                                      | N                                   |
| AL031848.2   | 0.742871843                            | N                                            | 0                                      | N                                   |
| IZUMO1       | 0.742871843                            | N                                            | 0                                      | N                                   |
| RAB5C        | 0.742871843                            | N                                            | 5                                      | N                                   |
| SARDH        | 0.742871843                            | N                                            | 1                                      | N                                   |
| BAG5         | 0.742897377                            | N                                            | 0                                      | N                                   |
| XG           | 0.742902799                            | N                                            | 14                                     | N                                   |
| AC124017.1   | 0.742905403                            | N                                            | 0                                      | N                                   |

| Gene symbols   | FDR (differential expression analysis) | Differentially expressed gene? Y, Yes; N, No | Number of insulin related publications | Insulin related gene? Y, Yes; N, No |
|----------------|----------------------------------------|----------------------------------------------|----------------------------------------|-------------------------------------|
| KLHL26         | 0.74290544                             | N                                            | 0                                      | N                                   |
| Z97985.1       | 0.74290544                             | N                                            | 0                                      | N                                   |
| AC010890.1     | 0.742916027                            | N                                            | 0                                      | N                                   |
| PLD6           | 0.743011794                            | N                                            | 0                                      | N                                   |
| CTNNA1P1       | 0.743114623                            | N                                            | 0                                      | N                                   |
| DCAKD          | 0.743114623                            | N                                            | 0                                      | N                                   |
| PBX2           | 0.743114623                            | N                                            | 2                                      | N                                   |
| PCF11-AS1      | 0.743114623                            | N                                            | 0                                      | N                                   |
| RBCK1          | 0.743114623                            | N                                            | 0                                      | N                                   |
| SELENOW        | 0.743114623                            | N                                            | 0                                      | N                                   |
| TMEM170B       | 0.743114623                            | N                                            | 0                                      | N                                   |
| TPP1           | 0.743114623                            | N                                            | 0                                      | N                                   |
| AC007382.1     | 0.743116647                            | N                                            | 0                                      | N                                   |
| AC016397.2     | 0.743116647                            | N                                            | 0                                      | N                                   |
| CLNK           | 0.743116647                            | N                                            | 0                                      | N                                   |
| FAM213B        | 0.743116647                            | N                                            | 0                                      | N                                   |
| LONRF1         | 0.743116647                            | N                                            | 0                                      | N                                   |
| PRTFDC1        | 0.743116647                            | N                                            | 0                                      | N                                   |
| AC005332.8     | 0.743145233                            | N                                            | 0                                      | N                                   |
| AL139005.1     | 0.743145233                            | N                                            | 0                                      | N                                   |
| POMP           | 0.743145233                            | N                                            | 23                                     | N                                   |
| RLIM           | 0.743145233                            | N                                            | 1                                      | N                                   |
| ABCA7          | 0.743220646                            | N                                            | 1                                      | N                                   |
| AC073957.2     | 0.743220646                            | N                                            | 0                                      | N                                   |
| AC090589.3     | 0.743220646                            | N                                            | 0                                      | N                                   |
| AL133353.1     | 0.743220646                            | N                                            | 0                                      | N                                   |
| AP003108.4     | 0.743220646                            | N                                            | 0                                      | N                                   |
| CASS4          | 0.743220646                            | N                                            | 0                                      | N                                   |
| EEF1B2P8       | 0.743220646                            | N                                            | 0                                      | N                                   |
| FAM229A        | 0.743220646                            | N                                            | 0                                      | N                                   |
| FAM86C2P       | 0.743220646                            | N                                            | 0                                      | N                                   |
| FAS            | 0.743220646                            | N                                            | 1000                                   | Y                                   |
| GAP43          | 0.743220646                            | N                                            | 16                                     | N                                   |
| HNRNPUL2-BSCL2 | 0.743220646                            | N                                            | 0                                      | N                                   |
| LINC01504      | 0.743220646                            | N                                            | 0                                      | N                                   |
| MCOLN2         | 0.743220646                            | N                                            | 1                                      | N                                   |
| MIR193BHG      | 0.743220646                            | N                                            | 0                                      | N                                   |
| POLR2E         | 0.743220646                            | N                                            | 0                                      | N                                   |
| POM121L7P      | 0.743220646                            | N                                            | 0                                      | N                                   |
| RAB36          | 0.743220646                            | N                                            | 0                                      | N                                   |
| SCAF4          | 0.743220646                            | N                                            | 0                                      | N                                   |
| SIAH2          | 0.743220646                            | N                                            | 3                                      | N                                   |
| SPNS1          | 0.743220646                            | N                                            | 0                                      | N                                   |
| STX10          | 0.743220646                            | N                                            | 0                                      | N                                   |
| TOMM40L        | 0.743220646                            | N                                            | 0                                      | N                                   |
| TRAK2          | 0.743220646                            | N                                            | 0                                      | N                                   |
| AQP10          | 0.743257856                            | N                                            | 4                                      | N                                   |
| PAICSP1        | 0.743257856                            | N                                            | 0                                      | N                                   |
| TAPBPL         | 0.743440551                            | N                                            | 0                                      | N                                   |
| AC010329.1     | 0.743522532                            | N                                            | 0                                      | N                                   |
| AL078603.1     | 0.743522532                            | N                                            | 0                                      | N                                   |
| ALMS1          | 0.743522532                            | N                                            | 53                                     | N                                   |
| FLII           | 0.743522532                            | N                                            | 1                                      | N                                   |
| AL162390.1     | 0.743751878                            | N                                            | 0                                      | N                                   |
| SFXN1          | 0.743751878                            | N                                            | 2                                      | N                                   |
| COMTD1         | 0.743942831                            | N                                            | 0                                      | N                                   |
| ECE1           | 0.743942831                            | N                                            | 7                                      | N                                   |
| AC087499.5     | 0.744006202                            | N                                            | 0                                      | N                                   |
| PLEKHA2        | 0.74403036                             | N                                            | 2                                      | N                                   |
| CBX1P2         | 0.744048985                            | N                                            | 0                                      | N                                   |
| MSRB1          | 0.744048985                            | N                                            | 3                                      | N                                   |
| AC004754.1     | 0.744080831                            | N                                            | 0                                      | N                                   |
| AC119403.1     | 0.744080831                            | N                                            | 0                                      | N                                   |
| AL109615.3     | 0.744080831                            | N                                            | 0                                      | N                                   |
| ALG11          | 0.744080831                            | N                                            | 0                                      | N                                   |
| ATP2B1         | 0.744080831                            | N                                            | 7                                      | N                                   |



| Gene symbols   | FDR (differential expression analysis) | Differentially expressed gene? Y, Yes; N, No | Number of insulin related publications | Insulin related gene? Y, Yes; N, No |
|----------------|----------------------------------------|----------------------------------------------|----------------------------------------|-------------------------------------|
| ATXN7L2        | 0.744080831                            | N                                            | 0                                      | N                                   |
| C9orf153       | 0.744080831                            | N                                            | 0                                      | N                                   |
| GABBR1         | 0.744080831                            | N                                            | 1                                      | N                                   |
| MFSD1          | 0.744080831                            | N                                            | 0                                      | N                                   |
| RCC2P4         | 0.744080831                            | N                                            | 0                                      | N                                   |
| TMEM256-PLSCR3 | 0.744080831                            | N                                            | 0                                      | N                                   |
| CABLES2        | 0.744120097                            | N                                            | 0                                      | N                                   |
| NPM1P6         | 0.744120097                            | N                                            | 0                                      | N                                   |
| AC073335.2     | 0.744147522                            | N                                            | 0                                      | N                                   |
| RYR3           | 0.744147522                            | N                                            | 92                                     | N                                   |
| AC068491.1     | 0.744215214                            | N                                            | 0                                      | N                                   |
| ANKRD45        | 0.744215214                            | N                                            | 0                                      | N                                   |
| DLGAP1-AS1     | 0.744215214                            | N                                            | 0                                      | N                                   |
| DUXAP9         | 0.744215214                            | N                                            | 0                                      | N                                   |
| IFI6           | 0.744215214                            | N                                            | 0                                      | N                                   |
| SUDS3          | 0.744215214                            | N                                            | 0                                      | N                                   |
| TRMT61A        | 0.744215214                            | N                                            | 0                                      | N                                   |
| SLC44A2        | 0.744328378                            | N                                            | 0                                      | N                                   |
| AC068491.4     | 0.744331053                            | N                                            | 0                                      | N                                   |
| CLIC2          | 0.744331053                            | N                                            | 0                                      | N                                   |
| EXOSC5         | 0.744331053                            | N                                            | 0                                      | N                                   |
| IRF2BP1        | 0.744331053                            | N                                            | 0                                      | N                                   |
| NME7           | 0.744331053                            | N                                            | 0                                      | N                                   |
| OLFML2B        | 0.744331053                            | N                                            | 0                                      | N                                   |
| AC020612.1     | 0.744343666                            | N                                            | 0                                      | N                                   |
| ADAM23         | 0.744343666                            | N                                            | 1                                      | N                                   |
| AL137060.1     | 0.744343666                            | N                                            | 0                                      | N                                   |
| ITPKA          | 0.744343666                            | N                                            | 0                                      | N                                   |
| NARF-IT1       | 0.744378251                            | N                                            | 0                                      | N                                   |
| USP2           | 0.744378251                            | N                                            | 3                                      | N                                   |
| AC139769.1     | 0.744512717                            | N                                            | 0                                      | N                                   |
| PDCD1LG2       | 0.744512717                            | N                                            | 0                                      | N                                   |
| ZNF772         | 0.744512717                            | N                                            | 0                                      | N                                   |
| AC104109.2     | 0.744695511                            | N                                            | 0                                      | N                                   |
| KRBA2          | 0.744695511                            | N                                            | 0                                      | N                                   |
| TTC28          | 0.744695511                            | N                                            | 1                                      | N                                   |
| CSF1           | 0.744812777                            | N                                            | 12                                     | N                                   |
| ARFGAP2        | 0.744941511                            | N                                            | 0                                      | N                                   |
| PARD6G         | 0.744949394                            | N                                            | 0                                      | N                                   |
| RPLP0          | 0.744949394                            | N                                            | 5                                      | N                                   |
| THAP5P1        | 0.744949394                            | N                                            | 0                                      | N                                   |
| NDUFA4L2       | 0.745023722                            | N                                            | 1                                      | N                                   |
| AL391069.3     | 0.745255576                            | N                                            | 0                                      | N                                   |
| EPC1           | 0.745255576                            | N                                            | 0                                      | N                                   |
| FAHD2P1        | 0.745255576                            | N                                            | 0                                      | N                                   |
| NCBP3          | 0.745255576                            | N                                            | 0                                      | N                                   |
| NDUFS2         | 0.745255576                            | N                                            | 1                                      | N                                   |
| PDIA5          | 0.745255576                            | N                                            | 0                                      | N                                   |
| PLXNA1         | 0.745255576                            | N                                            | 0                                      | N                                   |
| AC092447.1     | 0.745347678                            | N                                            | 0                                      | N                                   |
| INHA           | 0.745347678                            | N                                            | 110                                    | Y                                   |
| LINC00507      | 0.745347678                            | N                                            | 0                                      | N                                   |
| SPATS2L        | 0.745347678                            | N                                            | 2                                      | N                                   |
| FLJ20021       | 0.745433537                            | N                                            | 0                                      | N                                   |
| WISP2          | 0.745557944                            | N                                            | 17                                     | N                                   |
| C17orf77       | 0.745676269                            | N                                            | 0                                      | N                                   |
| DM1-AS         | 0.745676269                            | N                                            | 1                                      | N                                   |
| ELOA-AS1       | 0.745676269                            | N                                            | 0                                      | N                                   |
| LINC00483      | 0.745676269                            | N                                            | 0                                      | N                                   |
| AL354685.2     | 0.745802825                            | N                                            | 0                                      | N                                   |
| AL359976.1     | 0.745802825                            | N                                            | 0                                      | N                                   |
| EPS8L2         | 0.745802825                            | N                                            | 0                                      | N                                   |
| MED15          | 0.745802825                            | N                                            | 1                                      | N                                   |
| RN7SL811P      | 0.745802825                            | N                                            | 0                                      | N                                   |
| AC007950.2     | 0.745901438                            | N                                            | 0                                      | N                                   |
| AC037487.1     | 0.745901438                            | N                                            | 0                                      | N                                   |

| Gene symbols | FDR (differential expression analysis) | Differentially expressed gene? Y, Yes; N, No | Number of insulin related publications | Insulin related gene? Y, Yes; N, No |
|--------------|----------------------------------------|----------------------------------------------|----------------------------------------|-------------------------------------|
| FLJ42102     | 0.745901438                            | N                                            | 0                                      | N                                   |
| HMGB1P3      | 0.745901438                            | N                                            | 0                                      | N                                   |
| IRX1         | 0.745901438                            | N                                            | 1                                      | N                                   |
| LINC01443    | 0.745901438                            | N                                            | 0                                      | N                                   |
| MIR210HG     | 0.745901438                            | N                                            | 1                                      | N                                   |
| NTAN1        | 0.745901438                            | N                                            | 0                                      | N                                   |
| PLA1A        | 0.745901438                            | N                                            | 0                                      | N                                   |
| PPP1R21      | 0.745901438                            | N                                            | 0                                      | N                                   |
| RSU1P2       | 0.745901438                            | N                                            | 0                                      | N                                   |
| TBC1D1       | 0.745901438                            | N                                            | 115                                    | Y                                   |
| TPT1P9       | 0.745901438                            | N                                            | 0                                      | N                                   |
| U1           | 0.745901438                            | N                                            | 13                                     | N                                   |
| ZNF26        | 0.745901438                            | N                                            | 0                                      | N                                   |
| RNASEL       | 0.746357139                            | N                                            | 2                                      | N                                   |
| MEG8         | 0.746401834                            | N                                            | 0                                      | N                                   |
| AC007342.1   | 0.746500072                            | N                                            | 0                                      | N                                   |
| AC114300.1   | 0.746500286                            | N                                            | 0                                      | N                                   |
| RBMXL1       | 0.746500286                            | N                                            | 0                                      | N                                   |
| RNF40        | 0.746500286                            | N                                            | 1                                      | N                                   |
| ACSL4        | 0.746518906                            | N                                            | 18                                     | N                                   |
| LTV1         | 0.746518906                            | N                                            | 0                                      | N                                   |
| TPK1         | 0.746518906                            | N                                            | 1                                      | N                                   |
| SOCS6        | 0.746803106                            | N                                            | 9                                      | N                                   |
| MYL12BP2     | 0.746846663                            | N                                            | 0                                      | N                                   |
| GDI2P2       | 0.746966467                            | N                                            | 0                                      | N                                   |
| VAPB         | 0.746966467                            | N                                            | 2                                      | N                                   |
| AC131009.4   | 0.746969425                            | N                                            | 0                                      | N                                   |
| EMX2OS       | 0.746969425                            | N                                            | 0                                      | N                                   |
| FAM208A      | 0.746969425                            | N                                            | 0                                      | N                                   |
| FGD2         | 0.746969425                            | N                                            | 0                                      | N                                   |
| GPATCH11     | 0.746969425                            | N                                            | 0                                      | N                                   |
| POLR3B       | 0.746969425                            | N                                            | 0                                      | N                                   |
| TP53RK       | 0.746969425                            | N                                            | 0                                      | N                                   |
| AC095052.1   | 0.747037422                            | N                                            | 0                                      | N                                   |
| AP003168.2   | 0.747037422                            | N                                            | 0                                      | N                                   |
| C2orf66      | 0.747037422                            | N                                            | 0                                      | N                                   |
| SOCS3        | 0.747037422                            | N                                            | 428                                    | Y                                   |
| AC093014.1   | 0.747041032                            | N                                            | 0                                      | N                                   |
| AC092642.1   | 0.747123086                            | N                                            | 0                                      | N                                   |
| AL606763.1   | 0.747123086                            | N                                            | 0                                      | N                                   |
| PRPF40A      | 0.747123086                            | N                                            | 0                                      | N                                   |
| RN7SL653P    | 0.747123086                            | N                                            | 0                                      | N                                   |
| LINC00571    | 0.747229931                            | N                                            | 0                                      | N                                   |
| THPO         | 0.747229931                            | N                                            | 1                                      | N                                   |
| AC132812.1   | 0.747287409                            | N                                            | 0                                      | N                                   |
| CXXC1        | 0.747347515                            | N                                            | 0                                      | N                                   |
| GNL2         | 0.747347515                            | N                                            | 0                                      | N                                   |
| IGHEP2       | 0.747593402                            | N                                            | 0                                      | N                                   |
| DNAJC27      | 0.747658403                            | N                                            | 2                                      | N                                   |
| SSSCA1-AS1   | 0.747658403                            | N                                            | 0                                      | N                                   |
| AC004014.2   | 0.747881619                            | N                                            | 0                                      | N                                   |
| AL033397.1   | 0.747881619                            | N                                            | 0                                      | N                                   |
| ITM2A        | 0.747881619                            | N                                            | 3                                      | N                                   |
| LETMD1       | 0.747881619                            | N                                            | 1                                      | N                                   |
| NME4         | 0.747881619                            | N                                            | 0                                      | N                                   |
| PES1P1       | 0.747881619                            | N                                            | 0                                      | N                                   |
| PMP22        | 0.747881619                            | N                                            | 7                                      | N                                   |
| SURF4        | 0.747881619                            | N                                            | 0                                      | N                                   |
| AC012291.1   | 0.747938421                            | N                                            | 0                                      | N                                   |
| DNAJC27-AS1  | 0.747938421                            | N                                            | 0                                      | N                                   |
| FAM84B       | 0.747938421                            | N                                            | 0                                      | N                                   |
| ICK          | 0.747938421                            | N                                            | 4                                      | N                                   |
| TSNAX        | 0.747938421                            | N                                            | 0                                      | N                                   |
| SEPT2        | 0.74807878                             | N                                            | 2                                      | N                                   |
| AASS         | 0.74807878                             | N                                            | 5                                      | N                                   |
| AC008972.2   | 0.74807878                             | N                                            | 0                                      | N                                   |

| Gene symbols | FDR (differential expression analysis) | Differentially expressed gene? Y, Yes; N, No | Number of insulin related publications | Insulin related gene? Y, Yes; N, No |
|--------------|----------------------------------------|----------------------------------------------|----------------------------------------|-------------------------------------|
| AC010643.1   | 0.74807878                             | N                                            | 0                                      | N                                   |
| AGGF1P7      | 0.74807878                             | N                                            | 0                                      | N                                   |
| AL592211.1   | 0.74807878                             | N                                            | 0                                      | N                                   |
| AUP1         | 0.74807878                             | N                                            | 0                                      | N                                   |
| BX323845.3   | 0.74807878                             | N                                            | 0                                      | N                                   |
| C6orf226     | 0.74807878                             | N                                            | 0                                      | N                                   |
| CAHM         | 0.74807878                             | N                                            | 0                                      | N                                   |
| CLCN6        | 0.74807878                             | N                                            | 0                                      | N                                   |
| DTNA         | 0.74807878                             | N                                            | 0                                      | N                                   |
| ENSA         | 0.74807878                             | N                                            | 10                                     | N                                   |
| FAM27C       | 0.74807878                             | N                                            | 0                                      | N                                   |
| FCHSD1       | 0.74807878                             | N                                            | 0                                      | N                                   |
| GREB1        | 0.74807878                             | N                                            | 2                                      | N                                   |
| HGFAC        | 0.74807878                             | N                                            | 1                                      | N                                   |
| IL1RL1       | 0.74807878                             | N                                            | 11                                     | N                                   |
| KRT8P36      | 0.74807878                             | N                                            | 0                                      | N                                   |
| MFAP2        | 0.74807878                             | N                                            | 2                                      | N                                   |
| MIR17HG      | 0.74807878                             | N                                            | 2                                      | N                                   |
| MORN3        | 0.74807878                             | N                                            | 0                                      | N                                   |
| PIK3AP1      | 0.74807878                             | N                                            | 1                                      | N                                   |
| PLEKHF2      | 0.74807878                             | N                                            | 0                                      | N                                   |
| PRMT6        | 0.74807878                             | N                                            | 4                                      | N                                   |
| RN7SL68P     | 0.74807878                             | N                                            | 0                                      | N                                   |
| RPS6KA4      | 0.74807878                             | N                                            | 2                                      | N                                   |
| SLC36A4      | 0.74807878                             | N                                            | 0                                      | N                                   |
| SLC38A7      | 0.74807878                             | N                                            | 0                                      | N                                   |
| SMN1         | 0.74807878                             | N                                            | 14                                     | N                                   |
| SRRM1P3      | 0.74807878                             | N                                            | 0                                      | N                                   |
| TMEM145      | 0.74807878                             | N                                            | 0                                      | N                                   |
| UTS2R        | 0.74807878                             | N                                            | 11                                     | N                                   |
| UXT          | 0.74807878                             | N                                            | 0                                      | N                                   |
| VPS36        | 0.74807878                             | N                                            | 1                                      | N                                   |
| WASF4P       | 0.74807878                             | N                                            | 0                                      | N                                   |
| ZMAT2        | 0.74807878                             | N                                            | 0                                      | N                                   |
| AC004069.2   | 0.748149388                            | N                                            | 0                                      | N                                   |
| AC008073.3   | 0.748149388                            | N                                            | 0                                      | N                                   |
| AC009509.1   | 0.748149388                            | N                                            | 0                                      | N                                   |
| AC099494.2   | 0.748149388                            | N                                            | 0                                      | N                                   |
| AC116158.1   | 0.748149388                            | N                                            | 0                                      | N                                   |
| AC146507.2   | 0.748149388                            | N                                            | 0                                      | N                                   |
| AL669983.1   | 0.748149388                            | N                                            | 0                                      | N                                   |
| CPPED1       | 0.748149388                            | N                                            | 1                                      | N                                   |
| IDH1-AS1     | 0.748149388                            | N                                            | 0                                      | N                                   |
| IQCA1        | 0.748149388                            | N                                            | 0                                      | N                                   |
| LDHC         | 0.748149388                            | N                                            | 3                                      | N                                   |
| LURAP1       | 0.748149388                            | N                                            | 0                                      | N                                   |
| RBM45        | 0.748149388                            | N                                            | 0                                      | N                                   |
| SERPINB9P1   | 0.748149388                            | N                                            | 0                                      | N                                   |
| SUB1P1       | 0.748149388                            | N                                            | 0                                      | N                                   |
| TRPC1        | 0.748149388                            | N                                            | 13                                     | N                                   |
| ZEB2-AS1     | 0.748149388                            | N                                            | 0                                      | N                                   |
| AL391261.1   | 0.748318693                            | N                                            | 0                                      | N                                   |
| MED28P4      | 0.748318693                            | N                                            | 0                                      | N                                   |
| NR1D1        | 0.748318693                            | N                                            | 22                                     | N                                   |
| AC006262.2   | 0.748399885                            | N                                            | 0                                      | N                                   |
| AC011466.4   | 0.748399885                            | N                                            | 0                                      | N                                   |
| HIST3H2BB    | 0.748399885                            | N                                            | 0                                      | N                                   |
| NUDT17       | 0.748399885                            | N                                            | 0                                      | N                                   |
| PLEKHM1      | 0.748399885                            | N                                            | 0                                      | N                                   |
| ZNF205-AS1   | 0.748399885                            | N                                            | 0                                      | N                                   |
| TMX2         | 0.748459017                            | N                                            | 0                                      | N                                   |
| B3GNT5       | 0.748481213                            | N                                            | 0                                      | N                                   |
| LZTR1        | 0.748481213                            | N                                            | 1                                      | N                                   |
| PSG9         | 0.748481213                            | N                                            | 1                                      | N                                   |
| AC245052.4   | 0.748531839                            | N                                            | 0                                      | N                                   |
| AL032819.2   | 0.748531839                            | N                                            | 0                                      | N                                   |

| Gene symbols | FDR (differential expression analysis) | Differentially expressed gene? Y, Yes; N, No | Number of insulin related publications | Insulin related gene? Y, Yes; N, No |
|--------------|----------------------------------------|----------------------------------------------|----------------------------------------|-------------------------------------|
| WDR61        | 0.748531839                            | N                                            | 0                                      | N                                   |
| AL023775.1   | 0.748558457                            | N                                            | 0                                      | N                                   |
| COCH         | 0.748558457                            | N                                            | 4                                      | N                                   |
| AL390728.2   | 0.748626712                            | N                                            | 0                                      | N                                   |
| AC023449.2   | 0.748884295                            | N                                            | 0                                      | N                                   |
| AP000265.1   | 0.748884295                            | N                                            | 0                                      | N                                   |
| ARL13B       | 0.748884295                            | N                                            | 0                                      | N                                   |
| C6orf223     | 0.748884295                            | N                                            | 0                                      | N                                   |
| DEPDC5       | 0.748884295                            | N                                            | 0                                      | N                                   |
| DNAH17       | 0.748884295                            | N                                            | 0                                      | N                                   |
| FGF9         | 0.748884295                            | N                                            | 15                                     | N                                   |
| FXR1         | 0.748884295                            | N                                            | 3                                      | N                                   |
| GPRC5C       | 0.748884295                            | N                                            | 1                                      | N                                   |
| GPX1P1       | 0.748884295                            | N                                            | 0                                      | N                                   |
| HRAT92       | 0.748884295                            | N                                            | 0                                      | N                                   |
| KDM3A        | 0.748884295                            | N                                            | 2                                      | N                                   |
| KLHL10       | 0.748884295                            | N                                            | 0                                      | N                                   |
| LAPTM4BP1    | 0.748884295                            | N                                            | 0                                      | N                                   |
| LINC02511    | 0.748884295                            | N                                            | 0                                      | N                                   |
| PEX2         | 0.748884295                            | N                                            | 1                                      | N                                   |
| PHACTR2      | 0.748884295                            | N                                            | 0                                      | N                                   |
| POLR2B       | 0.748884295                            | N                                            | 0                                      | N                                   |
| RPL8         | 0.748884295                            | N                                            | 2                                      | N                                   |
| SMIM3        | 0.748884295                            | N                                            | 0                                      | N                                   |
| SRRM4        | 0.748884295                            | N                                            | 0                                      | N                                   |
| STN1         | 0.748884295                            | N                                            | 0                                      | N                                   |
| NPM1P39      | 0.749013972                            | N                                            | 0                                      | N                                   |
| OXSM         | 0.749013972                            | N                                            | 0                                      | N                                   |
| AL391834.2   | 0.74904142                             | N                                            | 0                                      | N                                   |
| SLC16A7      | 0.74904142                             | N                                            | 17                                     | N                                   |
| EAF1         | 0.749051819                            | N                                            | 0                                      | N                                   |
| TMEM216      | 0.74914125                             | N                                            | 0                                      | N                                   |
| ABCC4        | 0.749176124                            | N                                            | 2                                      | N                                   |
| AC020951.1   | 0.749176124                            | N                                            | 0                                      | N                                   |
| AOX1         | 0.749176124                            | N                                            | 7                                      | N                                   |
| AP000619.2   | 0.749176124                            | N                                            | 0                                      | N                                   |
| GABARAPL3    | 0.749176124                            | N                                            | 0                                      | N                                   |
| KIAA1551     | 0.749176124                            | N                                            | 0                                      | N                                   |
| LG13         | 0.749176124                            | N                                            | 0                                      | N                                   |
| NECTIN2      | 0.749176124                            | N                                            | 0                                      | N                                   |
| NETO2        | 0.749176124                            | N                                            | 2                                      | N                                   |
| SLC15A1      | 0.749176124                            | N                                            | 14                                     | N                                   |
| SULT1A1      | 0.749176124                            | N                                            | 6                                      | N                                   |
| TSTA3        | 0.749176124                            | N                                            | 1                                      | N                                   |
| ZRANB2       | 0.749176124                            | N                                            | 0                                      | N                                   |
| AL645608.3   | 0.749390959                            | N                                            | 0                                      | N                                   |
| ARHGAP20     | 0.749390959                            | N                                            | 0                                      | N                                   |
| FRMD3        | 0.749390959                            | N                                            | 2                                      | N                                   |
| NKX2-8       | 0.749390959                            | N                                            | 0                                      | N                                   |
| SCARNA7      | 0.749390959                            | N                                            | 0                                      | N                                   |
| AC073195.1   | 0.749430036                            | N                                            | 0                                      | N                                   |
| RAB28P5      | 0.749470855                            | N                                            | 0                                      | N                                   |
| SMARCE1P6    | 0.749470855                            | N                                            | 0                                      | N                                   |
| GRK5         | 0.749518992                            | N                                            | 10                                     | N                                   |
| CHN1         | 0.749680394                            | N                                            | 0                                      | N                                   |
| FPGT-TNNI3K  | 0.749680394                            | N                                            | 0                                      | N                                   |
| UTP3         | 0.749680394                            | N                                            | 0                                      | N                                   |
| Z95331.1     | 0.749688516                            | N                                            | 0                                      | N                                   |
| CCDC7        | 0.74973985                             | N                                            | 0                                      | N                                   |
| BMS1P2       | 0.749776987                            | N                                            | 0                                      | N                                   |
| AC091729.3   | 0.749815348                            | N                                            | 0                                      | N                                   |
| AC093311.1   | 0.749815348                            | N                                            | 0                                      | N                                   |
| MRPL35P4     | 0.749815348                            | N                                            | 0                                      | N                                   |
| PHF3         | 0.749815348                            | N                                            | 0                                      | N                                   |
| RBSN         | 0.749815348                            | N                                            | 0                                      | N                                   |
| RPS28        | 0.749815348                            | N                                            | 0                                      | N                                   |

| Gene symbols | FDR (differential expression analysis) | Differentially expressed gene? Y, Yes; N, No | Number of insulin related publications | Insulin related gene? Y, Yes; N, No |
|--------------|----------------------------------------|----------------------------------------------|----------------------------------------|-------------------------------------|
| SLC3A2       | 0.749815348                            | N                                            | 6                                      | N                                   |
| YOD1         | 0.749815348                            | N                                            | 0                                      | N                                   |
| ZDHHC6       | 0.749815348                            | N                                            | 0                                      | N                                   |
| AC004835.2   | 0.749941873                            | N                                            | 0                                      | N                                   |
| AC008074.1   | 0.749941873                            | N                                            | 0                                      | N                                   |
| ACVR2B-AS1   | 0.749941873                            | N                                            | 0                                      | N                                   |
| AP000911.2   | 0.749941873                            | N                                            | 0                                      | N                                   |
| ATCAY        | 0.749941873                            | N                                            | 0                                      | N                                   |
| FOKK1        | 0.749941873                            | N                                            | 4                                      | N                                   |
| GLRX2        | 0.749941873                            | N                                            | 1                                      | N                                   |
| GMIP         | 0.749941873                            | N                                            | 0                                      | N                                   |
| LINC00960    | 0.749941873                            | N                                            | 0                                      | N                                   |
| SLC16A12     | 0.749941873                            | N                                            | 0                                      | N                                   |
| SLC39A3      | 0.749941873                            | N                                            | 1                                      | N                                   |
| TCF12        | 0.749941873                            | N                                            | 1                                      | N                                   |
| AC046143.1   | 0.750144602                            | N                                            | 0                                      | N                                   |
| AC087385.1   | 0.750144602                            | N                                            | 0                                      | N                                   |
| AC125611.2   | 0.750144602                            | N                                            | 0                                      | N                                   |
| ARPC3        | 0.750144602                            | N                                            | 2                                      | N                                   |
| RSPRY1       | 0.750144602                            | N                                            | 0                                      | N                                   |
| STRN3        | 0.750144602                            | N                                            | 0                                      | N                                   |
| TEX10        | 0.750144602                            | N                                            | 0                                      | N                                   |
| TMSB4XP6     | 0.750144602                            | N                                            | 0                                      | N                                   |
| AC007969.1   | 0.750148278                            | N                                            | 0                                      | N                                   |
| AC012377.1   | 0.750148278                            | N                                            | 0                                      | N                                   |
| AP002373.1   | 0.750148278                            | N                                            | 0                                      | N                                   |
| PSMB9        | 0.750148278                            | N                                            | 0                                      | N                                   |
| RPS6KA6      | 0.750148278                            | N                                            | 1                                      | N                                   |
| CIAPIN1      | 0.750198693                            | N                                            | 1                                      | N                                   |
| TMC5         | 0.750284677                            | N                                            | 0                                      | N                                   |
| AC083862.1   | 0.750849601                            | N                                            | 0                                      | N                                   |
| ACVR1B       | 0.750849601                            | N                                            | 5                                      | N                                   |
| AL096829.2   | 0.750849601                            | N                                            | 0                                      | N                                   |
| AP001178.3   | 0.750849601                            | N                                            | 0                                      | N                                   |
| HMGB1P31     | 0.750849601                            | N                                            | 0                                      | N                                   |
| MTRNR2L6     | 0.750849601                            | N                                            | 0                                      | N                                   |
| SOD3         | 0.750849601                            | N                                            | 15                                     | N                                   |
| TIMM17BP1    | 0.750849601                            | N                                            | 0                                      | N                                   |
| TPTE2P2      | 0.750849601                            | N                                            | 0                                      | N                                   |
| ZNF567       | 0.750849601                            | N                                            | 0                                      | N                                   |
| AL392089.1   | 0.751083614                            | N                                            | 0                                      | N                                   |
| LINC01623    | 0.751083614                            | N                                            | 0                                      | N                                   |
| MRPS10       | 0.751083614                            | N                                            | 0                                      | N                                   |
| PLIN3        | 0.751133855                            | N                                            | 13                                     | N                                   |
| CCDC71       | 0.751209072                            | N                                            | 0                                      | N                                   |
| AC061975.7   | 0.751342651                            | N                                            | 0                                      | N                                   |
| ASPG         | 0.751342651                            | N                                            | 0                                      | N                                   |
| DDX1         | 0.751342651                            | N                                            | 2                                      | N                                   |
| PIGHP1       | 0.751342651                            | N                                            | 0                                      | N                                   |
| AC004987.2   | 0.751484464                            | N                                            | 0                                      | N                                   |
| ADCY4        | 0.751484464                            | N                                            | 1                                      | N                                   |
| C1S          | 0.751484464                            | N                                            | 9                                      | N                                   |
| DAP          | 0.751484464                            | N                                            | 36                                     | N                                   |
| EPN3         | 0.751484464                            | N                                            | 2                                      | N                                   |
| LMO3         | 0.751484464                            | N                                            | 0                                      | N                                   |
| RPH3A        | 0.751484464                            | N                                            | 0                                      | N                                   |
| ZNF646       | 0.751484464                            | N                                            | 0                                      | N                                   |
| AC020910.5   | 0.751554684                            | N                                            | 0                                      | N                                   |
| IL1RN        | 0.751554684                            | N                                            | 95                                     | N                                   |
| ARTN         | 0.751569799                            | N                                            | 2                                      | N                                   |
| FLNB-AS1     | 0.751569799                            | N                                            | 0                                      | N                                   |
| ABL1         | 0.751689599                            | N                                            | 7                                      | N                                   |
| TIRAP        | 0.751712599                            | N                                            | 4                                      | N                                   |
| EPDR1        | 0.751756648                            | N                                            | 4                                      | N                                   |
| ZNF860       | 0.751801849                            | N                                            | 0                                      | N                                   |
| AL022334.1   | 0.751848469                            | N                                            | 0                                      | N                                   |

| Gene symbols | FDR (differential expression analysis) | Differentially expressed gene? Y, Yes; N, No | Number of insulin related publications | Insulin related gene? Y, Yes; N, No |
|--------------|----------------------------------------|----------------------------------------------|----------------------------------------|-------------------------------------|
| LDB3         | 0.751877489                            | N                                            | 2                                      | N                                   |
| CFAP36       | 0.751977551                            | N                                            | 0                                      | N                                   |
| TAS1R3       | 0.751977551                            | N                                            | 9                                      | N                                   |
| GYG1P3       | 0.75210779                             | N                                            | 0                                      | N                                   |
| CCDC85C      | 0.752108068                            | N                                            | 0                                      | N                                   |
| TRIM27       | 0.752108068                            | N                                            | 1                                      | N                                   |
| AL139276.1   | 0.752359981                            | N                                            | 0                                      | N                                   |
| C1orf186     | 0.752411862                            | N                                            | 0                                      | N                                   |
| LUZP1        | 0.752411862                            | N                                            | 0                                      | N                                   |
| MRPS14       | 0.752411862                            | N                                            | 0                                      | N                                   |
| SEPT7P8      | 0.752411862                            | N                                            | 0                                      | N                                   |
| SNAPC3       | 0.752411862                            | N                                            | 0                                      | N                                   |
| TFAP2A-AS1   | 0.752411862                            | N                                            | 0                                      | N                                   |
| TSKU         | 0.752411862                            | N                                            | 0                                      | N                                   |
| TSSC2        | 0.752411862                            | N                                            | 0                                      | N                                   |
| LAMTOR5      | 0.752483387                            | N                                            | 1                                      | N                                   |
| SERP2        | 0.752483387                            | N                                            | 1                                      | N                                   |
| FOXC1        | 0.752656875                            | N                                            | 4                                      | N                                   |
| C9orf66      | 0.752814831                            | N                                            | 0                                      | N                                   |
| UNKL         | 0.752901523                            | N                                            | 0                                      | N                                   |
| AC023906.3   | 0.752985869                            | N                                            | 0                                      | N                                   |
| GSTO1        | 0.752987353                            | N                                            | 4                                      | N                                   |
| INPPL1       | 0.752987353                            | N                                            | 113                                    | Y                                   |
| MLF1         | 0.752987353                            | N                                            | 3                                      | N                                   |
| R3HDM4       | 0.752987353                            | N                                            | 0                                      | N                                   |
| YIPF2        | 0.752987353                            | N                                            | 0                                      | N                                   |
| ARL2-SNX15   | 0.753041929                            | N                                            | 0                                      | N                                   |
| TSPAN15      | 0.75304197                             | N                                            | 0                                      | N                                   |
| PPP1R3F      | 0.753175092                            | N                                            | 1                                      | N                                   |
| UBE2QL1      | 0.753175092                            | N                                            | 0                                      | N                                   |
| AC010280.3   | 0.753203498                            | N                                            | 0                                      | N                                   |
| GABARAPL3    | 0.75333492                             | N                                            | 0                                      | N                                   |
| STK32A       | 0.75333492                             | N                                            | 0                                      | N                                   |
| TMEM132B     | 0.753342975                            | N                                            | 0                                      | N                                   |
| PGBD5        | 0.753476805                            | N                                            | 0                                      | N                                   |
| AL451063.1   | 0.7536653                              | N                                            | 0                                      | N                                   |
| RSAD2        | 0.7536653                              | N                                            | 0                                      | N                                   |
| BCLAF1P1     | 0.753687349                            | N                                            | 0                                      | N                                   |
| FHL2         | 0.753687349                            | N                                            | 9                                      | N                                   |
| METTTL24     | 0.753687349                            | N                                            | 0                                      | N                                   |
| TARDBPP1     | 0.753687349                            | N                                            | 0                                      | N                                   |
| AC114940.1   | 0.753863378                            | N                                            | 0                                      | N                                   |
| ELOVL3       | 0.753892233                            | N                                            | 7                                      | N                                   |
| TBC1D19      | 0.753892233                            | N                                            | 0                                      | N                                   |
| AC005523.2   | 0.754166984                            | N                                            | 0                                      | N                                   |
| FAH          | 0.754316066                            | N                                            | 25                                     | N                                   |
| HMGB3P7      | 0.754316066                            | N                                            | 0                                      | N                                   |
| VWF          | 0.754316066                            | N                                            | 240                                    | Y                                   |
| AC007099.1   | 0.754397593                            | N                                            | 0                                      | N                                   |
| ADAMTS13     | 0.754412147                            | N                                            | 4                                      | N                                   |
| LAGE3P1      | 0.754412147                            | N                                            | 0                                      | N                                   |
| MPC1         | 0.754427552                            | N                                            | 21                                     | N                                   |
| DKK1         | 0.754511189                            | N                                            | 59                                     | N                                   |
| DNAJC25      | 0.754511189                            | N                                            | 0                                      | N                                   |
| AP001318.3   | 0.754523966                            | N                                            | 0                                      | N                                   |
| CMPK1        | 0.754523966                            | N                                            | 0                                      | N                                   |
| PMM1         | 0.754523966                            | N                                            | 1                                      | N                                   |
| SCRN3        | 0.754655845                            | N                                            | 0                                      | N                                   |
| HNRNPCP7     | 0.754731894                            | N                                            | 0                                      | N                                   |
| MFSD4B       | 0.754731894                            | N                                            | 0                                      | N                                   |
| NIPAL4       | 0.754731894                            | N                                            | 0                                      | N                                   |
| AC025178.1   | 0.754854327                            | N                                            | 0                                      | N                                   |
| GRHPR        | 0.754854327                            | N                                            | 1                                      | N                                   |
| SLC29A2      | 0.754854327                            | N                                            | 7                                      | N                                   |
| PLCB1-IT1    | 0.754998687                            | N                                            | 0                                      | N                                   |
| AC107909.1   | 0.755015915                            | N                                            | 0                                      | N                                   |

| Gene symbols | FDR (differential expression analysis) | Differentially expressed gene? Y, Yes; N, No | Number of insulin related publications | Insulin related gene? Y, Yes; N, No |
|--------------|----------------------------------------|----------------------------------------------|----------------------------------------|-------------------------------------|
| AL121658.1   | 0.755015915                            | N                                            | 0                                      | N                                   |
| DENND4B      | 0.755015915                            | N                                            | 0                                      | N                                   |
| GLYATL2      | 0.755015915                            | N                                            | 0                                      | N                                   |
| LINC00908    | 0.755015915                            | N                                            | 0                                      | N                                   |
| MLKL         | 0.755015915                            | N                                            | 5                                      | N                                   |
| AC005759.1   | 0.755070998                            | N                                            | 0                                      | N                                   |
| PI4K2A       | 0.755070998                            | N                                            | 0                                      | N                                   |
| TOR3A        | 0.755070998                            | N                                            | 0                                      | N                                   |
| COL6A1       | 0.755251765                            | N                                            | 8                                      | N                                   |
| PSMC4        | 0.755251765                            | N                                            | 0                                      | N                                   |
| GRM5         | 0.755504333                            | N                                            | 7                                      | N                                   |
| BRWD1-IT1    | 0.755524941                            | N                                            | 0                                      | N                                   |
| MEI4         | 0.755524941                            | N                                            | 0                                      | N                                   |
| PLEKHF1      | 0.755524941                            | N                                            | 0                                      | N                                   |
| LINC01630    | 0.755552072                            | N                                            | 0                                      | N                                   |
| SLC23A1      | 0.755552072                            | N                                            | 0                                      | N                                   |
| PTPN6        | 0.75557756                             | N                                            | 101                                    | Y                                   |
| AL158201.1   | 0.755623657                            | N                                            | 0                                      | N                                   |
| AC090527.3   | 0.755743934                            | N                                            | 0                                      | N                                   |
| LRRC71       | 0.755743934                            | N                                            | 0                                      | N                                   |
| NARS         | 0.755743934                            | N                                            | 11                                     | N                                   |
| NECTIN4      | 0.755743934                            | N                                            | 1                                      | N                                   |
| NF1P1        | 0.755743934                            | N                                            | 0                                      | N                                   |
| PPP5D1       | 0.755743934                            | N                                            | 0                                      | N                                   |
| RAB11B-AS1   | 0.755743934                            | N                                            | 0                                      | N                                   |
| ST6GALNAC3   | 0.755743934                            | N                                            | 0                                      | N                                   |
| SYAP1        | 0.755743934                            | N                                            | 0                                      | N                                   |
| ASF1A        | 0.755768021                            | N                                            | 0                                      | N                                   |
| GAPLINC      | 0.755774564                            | N                                            | 0                                      | N                                   |
| HIST1H2BK    | 0.755774564                            | N                                            | 0                                      | N                                   |
| MDH2         | 0.755774564                            | N                                            | 2                                      | N                                   |
| PNRC2        | 0.755774564                            | N                                            | 1                                      | N                                   |
| SP1          | 0.755774564                            | N                                            | 379                                    | Y                                   |
| ZNF341       | 0.755774564                            | N                                            | 0                                      | N                                   |
| NDUFA1       | 0.756009706                            | N                                            | 1                                      | N                                   |
| PDIA6        | 0.756036203                            | N                                            | 7                                      | N                                   |
| AC021242.3   | 0.756321831                            | N                                            | 0                                      | N                                   |
| NEDD4L       | 0.756360578                            | N                                            | 30                                     | N                                   |
| PROSER2-AS1  | 0.756360578                            | N                                            | 0                                      | N                                   |
| AC067852.2   | 0.756414596                            | N                                            | 0                                      | N                                   |
| PHIP         | 0.756414596                            | N                                            | 11                                     | N                                   |
| AC025569.1   | 0.756415702                            | N                                            | 0                                      | N                                   |
| RPL21P93     | 0.756415702                            | N                                            | 0                                      | N                                   |
| AC079630.1   | 0.756483638                            | N                                            | 0                                      | N                                   |
| TNFSF12      | 0.756584098                            | N                                            | 17                                     | N                                   |
| AC078814.4   | 0.756634252                            | N                                            | 0                                      | N                                   |
| CCK          | 0.756634252                            | N                                            | 940                                    | Y                                   |
| DGKE         | 0.756634252                            | N                                            | 1                                      | N                                   |
| GPR1         | 0.756634252                            | N                                            | 8                                      | N                                   |
| STAG3L1      | 0.756634252                            | N                                            | 0                                      | N                                   |
| AC026785.2   | 0.756668052                            | N                                            | 0                                      | N                                   |
| MKRN5P       | 0.756698079                            | N                                            | 0                                      | N                                   |
| PARP9        | 0.756899459                            | N                                            | 0                                      | N                                   |
| PNPT1        | 0.757246335                            | N                                            | 0                                      | N                                   |
| AC002470.1   | 0.757270782                            | N                                            | 0                                      | N                                   |
| CDH4         | 0.757270782                            | N                                            | 1                                      | N                                   |
| CLIC4P3      | 0.757270782                            | N                                            | 0                                      | N                                   |
| DEGS1        | 0.757270782                            | N                                            | 2                                      | N                                   |
| FAM107B      | 0.757270782                            | N                                            | 0                                      | N                                   |
| HACD1        | 0.757270782                            | N                                            | 0                                      | N                                   |
| POU2F2       | 0.757270782                            | N                                            | 2                                      | N                                   |
| RBBP6        | 0.757270782                            | N                                            | 0                                      | N                                   |
| TSPO         | 0.757270782                            | N                                            | 12                                     | N                                   |
| VPS4A        | 0.757270782                            | N                                            | 1                                      | N                                   |
| MINK1        | 0.757388397                            | N                                            | 0                                      | N                                   |
| IFIT2        | 0.757572708                            | N                                            | 0                                      | N                                   |

| Gene symbols  | FDR (differential expression analysis) | Differentially expressed gene? Y, Yes; N, No | Number of insulin related publications | Insulin related gene? Y, Yes; N, No |
|---------------|----------------------------------------|----------------------------------------------|----------------------------------------|-------------------------------------|
| CLDN7         | 0.757591942                            | N                                            | 1                                      | N                                   |
| ATP5G1        | 0.757736475                            | N                                            | 0                                      | N                                   |
| TMEM41B       | 0.757736475                            | N                                            | 0                                      | N                                   |
| MYCT1         | 0.757787758                            | N                                            | 0                                      | N                                   |
| RUSC2         | 0.757787758                            | N                                            | 0                                      | N                                   |
| TIPIN         | 0.757787758                            | N                                            | 0                                      | N                                   |
| HAGLR         | 0.757879022                            | N                                            | 0                                      | N                                   |
| FAM20B        | 0.757973475                            | N                                            | 0                                      | N                                   |
| PSG11         | 0.757973475                            | N                                            | 0                                      | N                                   |
| PUS7L         | 0.757973475                            | N                                            | 0                                      | N                                   |
| TRIM28        | 0.757973475                            | N                                            | 4                                      | N                                   |
| IL7           | 0.757987301                            | N                                            | 10                                     | N                                   |
| BBC3          | 0.758265877                            | N                                            | 19                                     | N                                   |
| AC051619.7    | 0.758276254                            | N                                            | 0                                      | N                                   |
| CLIC4P1       | 0.758276254                            | N                                            | 0                                      | N                                   |
| RPL24P8       | 0.758276254                            | N                                            | 0                                      | N                                   |
| TRAC          | 0.758276254                            | N                                            | 14                                     | N                                   |
| ZNF534        | 0.758276254                            | N                                            | 0                                      | N                                   |
| CCNJ          | 0.758283616                            | N                                            | 0                                      | N                                   |
| CSNK1E        | 0.758365516                            | N                                            | 2                                      | N                                   |
| TLK2P2        | 0.758365516                            | N                                            | 0                                      | N                                   |
| CCT4P2        | 0.758491209                            | N                                            | 0                                      | N                                   |
| AC106818.1    | 0.758511507                            | N                                            | 0                                      | N                                   |
| RTL8A         | 0.758601617                            | N                                            | 0                                      | N                                   |
| AC006017.1    | 0.758641543                            | N                                            | 0                                      | N                                   |
| AL133415.1    | 0.758641543                            | N                                            | 0                                      | N                                   |
| BEX4          | 0.758641543                            | N                                            | 0                                      | N                                   |
| BOD1          | 0.758641543                            | N                                            | 0                                      | N                                   |
| MAN1C1        | 0.758641543                            | N                                            | 1                                      | N                                   |
| SLC2A11       | 0.758641543                            | N                                            | 1                                      | N                                   |
| VCPIP1        | 0.758641543                            | N                                            | 0                                      | N                                   |
| BRMS1L        | 0.758660193                            | N                                            | 0                                      | N                                   |
| RP3-461P17.10 | 0.758788136                            | N                                            | 0                                      | N                                   |
| C2orf16       | 0.758807227                            | N                                            | 0                                      | N                                   |
| PLCH1         | 0.758807227                            | N                                            | 1                                      | N                                   |
| AC012184.3    | 0.7588202                              | N                                            | 0                                      | N                                   |
| AL603865.1    | 0.758962763                            | N                                            | 0                                      | N                                   |
| AC104118.1    | 0.758993092                            | N                                            | 0                                      | N                                   |
| AC004805.2    | 0.759031977                            | N                                            | 0                                      | N                                   |
| STAP2         | 0.759150663                            | N                                            | 0                                      | N                                   |
| AC022882.1    | 0.75937892                             | N                                            | 0                                      | N                                   |
| ARVCF         | 0.75937892                             | N                                            | 0                                      | N                                   |
| B3GALT1       | 0.75937892                             | N                                            | 0                                      | N                                   |
| CLINT1        | 0.75937892                             | N                                            | 0                                      | N                                   |
| NSA2          | 0.75937892                             | N                                            | 0                                      | N                                   |
| USP25         | 0.75937892                             | N                                            | 2                                      | N                                   |
| UTP11         | 0.75937892                             | N                                            | 0                                      | N                                   |
| AC142381.3    | 0.759380761                            | N                                            | 0                                      | N                                   |
| ADGRG6        | 0.759380761                            | N                                            | 0                                      | N                                   |
| FUT2          | 0.759380761                            | N                                            | 5                                      | N                                   |
| TMPRSS2       | 0.759380761                            | N                                            | 7                                      | N                                   |
| FNTA          | 0.759422114                            | N                                            | 0                                      | N                                   |
| KCMF1         | 0.759631989                            | N                                            | 0                                      | N                                   |
| AL445524.1    | 0.759967746                            | N                                            | 0                                      | N                                   |
| COG1          | 0.759967746                            | N                                            | 0                                      | N                                   |
| SYNJ2BP       | 0.759967746                            | N                                            | 1                                      | N                                   |
| TVP23CP1      | 0.759967746                            | N                                            | 0                                      | N                                   |
| ZNF34         | 0.759967746                            | N                                            | 0                                      | N                                   |
| AC040977.1    | 0.759993265                            | N                                            | 0                                      | N                                   |
| PRDX1P1       | 0.759993265                            | N                                            | 0                                      | N                                   |
| SH2D3C        | 0.759993265                            | N                                            | 2                                      | N                                   |
| TCAF2         | 0.759993265                            | N                                            | 0                                      | N                                   |
| TMEM198       | 0.759993265                            | N                                            | 0                                      | N                                   |
| TMEM69        | 0.759993265                            | N                                            | 0                                      | N                                   |
| ZC2HC1A       | 0.759993265                            | N                                            | 0                                      | N                                   |
| ZYX           | 0.759993265                            | N                                            | 3                                      | N                                   |



| Gene symbols | FDR (differential expression analysis) | Differentially expressed gene? Y, Yes; N, No | Number of insulin related publications | Insulin related gene? Y, Yes; N, No |
|--------------|----------------------------------------|----------------------------------------------|----------------------------------------|-------------------------------------|
| AC093673.1   | 0.760075979                            | N                                            | 0                                      | N                                   |
| AC087683.1   | 0.760110895                            | N                                            | 0                                      | N                                   |
| AC108693.1   | 0.760129995                            | N                                            | 0                                      | N                                   |
| ENG          | 0.760157535                            | N                                            | 974                                    | Y                                   |
| SCARF2       | 0.760302645                            | N                                            | 0                                      | N                                   |
| MRPS27       | 0.760498032                            | N                                            | 0                                      | N                                   |
| FOXL2NB      | 0.760544029                            | N                                            | 0                                      | N                                   |
| UQCRC1       | 0.760544029                            | N                                            | 6                                      | N                                   |
| NPIPA1       | 0.760579494                            | N                                            | 0                                      | N                                   |
| ZNF611       | 0.760579494                            | N                                            | 0                                      | N                                   |
| HCP5         | 0.760711768                            | N                                            | 1                                      | N                                   |
| TGM1         | 0.760780302                            | N                                            | 0                                      | N                                   |
| AGT          | 0.760801539                            | N                                            | 139                                    | Y                                   |
| AL157714.2   | 0.760801539                            | N                                            | 0                                      | N                                   |
| AP000266.1   | 0.760801539                            | N                                            | 0                                      | N                                   |
| AP002387.1   | 0.760801539                            | N                                            | 0                                      | N                                   |
| C14orf39     | 0.760801539                            | N                                            | 0                                      | N                                   |
| CASC1        | 0.760801539                            | N                                            | 0                                      | N                                   |
| COL4A6       | 0.760801539                            | N                                            | 1                                      | N                                   |
| CTU1         | 0.760801539                            | N                                            | 0                                      | N                                   |
| FBXO15       | 0.760801539                            | N                                            | 0                                      | N                                   |
| IFT80        | 0.760801539                            | N                                            | 1                                      | N                                   |
| POLR1D       | 0.760801539                            | N                                            | 0                                      | N                                   |
| RPSAP41      | 0.760801539                            | N                                            | 0                                      | N                                   |
| SART1        | 0.760801539                            | N                                            | 0                                      | N                                   |
| SNORD94      | 0.760801539                            | N                                            | 0                                      | N                                   |
| ZNF549       | 0.760801539                            | N                                            | 0                                      | N                                   |
| ACADM        | 0.761157539                            | N                                            | 12                                     | N                                   |
| LHX4         | 0.761157539                            | N                                            | 9                                      | N                                   |
| LVRN         | 0.761157539                            | N                                            | 0                                      | N                                   |
| MEFV         | 0.761157539                            | N                                            | 1                                      | N                                   |
| AC005498.2   | 0.761172064                            | N                                            | 0                                      | N                                   |
| AC012618.1   | 0.761172064                            | N                                            | 0                                      | N                                   |
| AC090983.1   | 0.761172064                            | N                                            | 0                                      | N                                   |
| AL137145.2   | 0.761172064                            | N                                            | 0                                      | N                                   |
| CAVIN4       | 0.761172064                            | N                                            | 0                                      | N                                   |
| CD72         | 0.761172064                            | N                                            | 1                                      | N                                   |
| GLDCP1       | 0.761172064                            | N                                            | 0                                      | N                                   |
| HEPHL1       | 0.761172064                            | N                                            | 0                                      | N                                   |
| HSPA1B       | 0.761172064                            | N                                            | 3                                      | N                                   |
| LINC00899    | 0.761172064                            | N                                            | 0                                      | N                                   |
| PAM16        | 0.761172064                            | N                                            | 0                                      | N                                   |
| PBOV1        | 0.761172064                            | N                                            | 0                                      | N                                   |
| RFX1         | 0.761172064                            | N                                            | 3                                      | N                                   |
| SLC25A2      | 0.761172064                            | N                                            | 0                                      | N                                   |
| SLC39A6      | 0.761172064                            | N                                            | 5                                      | N                                   |
| TOP1MT       | 0.761172064                            | N                                            | 0                                      | N                                   |
| XRCC4        | 0.761172064                            | N                                            | 4                                      | N                                   |
| FGD4         | 0.76135346                             | N                                            | 2                                      | N                                   |
| AL512649.1   | 0.76135944                             | N                                            | 0                                      | N                                   |
| AP000873.4   | 0.76135944                             | N                                            | 0                                      | N                                   |
| HSP90AB2P    | 0.76135944                             | N                                            | 0                                      | N                                   |
| TYW3         | 0.76135944                             | N                                            | 2                                      | N                                   |
| AF131215.2   | 0.761375025                            | N                                            | 0                                      | N                                   |
| C1QTNF5      | 0.761375025                            | N                                            | 12                                     | N                                   |
| DUSP5        | 0.761375025                            | N                                            | 6                                      | N                                   |
| GPN3P1       | 0.761375025                            | N                                            | 0                                      | N                                   |
| MIR34AHG     | 0.761375025                            | N                                            | 0                                      | N                                   |
| NKAPL        | 0.761375025                            | N                                            | 0                                      | N                                   |
| SUPT5H       | 0.761375025                            | N                                            | 0                                      | N                                   |
| SYTL2        | 0.761375025                            | N                                            | 2                                      | N                                   |
| WASHC3       | 0.761403529                            | N                                            | 0                                      | N                                   |
| LG12         | 0.761404454                            | N                                            | 0                                      | N                                   |
| RPL35A       | 0.761404454                            | N                                            | 0                                      | N                                   |
| RWDD1        | 0.761404454                            | N                                            | 0                                      | N                                   |
| SCHLAP1      | 0.761404454                            | N                                            | 0                                      | N                                   |

| Gene symbols | FDR (differential expression analysis) | Differentially expressed gene? Y, Yes; N, No | Number of insulin related publications | Insulin related gene? Y, Yes; N, No |
|--------------|----------------------------------------|----------------------------------------------|----------------------------------------|-------------------------------------|
| PABPC4       | 0.761465199                            | N                                            | 0                                      | N                                   |
| AL163051.2   | 0.761614873                            | N                                            | 0                                      | N                                   |
| PTPRR        | 0.761614873                            | N                                            | 2                                      | N                                   |
| ALDH7A1P1    | 0.761637997                            | N                                            | 0                                      | N                                   |
| CHD1         | 0.761637997                            | N                                            | 0                                      | N                                   |
| IL17RE       | 0.761637997                            | N                                            | 0                                      | N                                   |
| OR1H1P       | 0.761637997                            | N                                            | 0                                      | N                                   |
| STXBP2       | 0.761637997                            | N                                            | 8                                      | N                                   |
| NFU1P1       | 0.761714396                            | N                                            | 0                                      | N                                   |
| ALG13        | 0.761914174                            | N                                            | 0                                      | N                                   |
| LIF          | 0.762024852                            | N                                            | 214                                    | Y                                   |
| MXRA8        | 0.762024852                            | N                                            | 1                                      | N                                   |
| CACNA2D4     | 0.762030749                            | N                                            | 0                                      | N                                   |
| SMAD6        | 0.762062853                            | N                                            | 6                                      | N                                   |
| AC244034.3   | 0.762083865                            | N                                            | 0                                      | N                                   |
| DNAJC30      | 0.762083865                            | N                                            | 0                                      | N                                   |
| TMEM106B     | 0.762083865                            | N                                            | 1                                      | N                                   |
| LCA5L        | 0.762096344                            | N                                            | 0                                      | N                                   |
| AC006435.2   | 0.762106519                            | N                                            | 0                                      | N                                   |
| AC040162.1   | 0.762106519                            | N                                            | 0                                      | N                                   |
| AL139082.1   | 0.762106519                            | N                                            | 0                                      | N                                   |
| PSMA6        | 0.762106519                            | N                                            | 2                                      | N                                   |
| MAP2         | 0.762163645                            | N                                            | 41                                     | N                                   |
| RPS6KA5      | 0.762163645                            | N                                            | 1                                      | N                                   |
| NUDT13       | 0.7622328                              | N                                            | 0                                      | N                                   |
| RASGRP4      | 0.7622328                              | N                                            | 0                                      | N                                   |
| RNF157       | 0.7622328                              | N                                            | 0                                      | N                                   |
| CALM2        | 0.762273229                            | N                                            | 2                                      | N                                   |
| CCDC144CP    | 0.762273229                            | N                                            | 0                                      | N                                   |
| VASH1-AS1    | 0.762390396                            | N                                            | 0                                      | N                                   |
| AL358933.1   | 0.762399755                            | N                                            | 0                                      | N                                   |
| RNASEH1-AS1  | 0.762399755                            | N                                            | 0                                      | N                                   |
| ZNF561       | 0.762399755                            | N                                            | 0                                      | N                                   |
| DES12        | 0.762436248                            | N                                            | 1                                      | N                                   |
| EEF1DP1      | 0.762463328                            | N                                            | 0                                      | N                                   |
| NAALAD2      | 0.762463328                            | N                                            | 0                                      | N                                   |
| NDUFB4       | 0.762463328                            | N                                            | 1                                      | N                                   |
| NR4A1        | 0.762463328                            | N                                            | 62                                     | N                                   |
| PRR35        | 0.762463328                            | N                                            | 0                                      | N                                   |
| SNRNP27      | 0.762463328                            | N                                            | 0                                      | N                                   |
| TMEM254      | 0.762463328                            | N                                            | 0                                      | N                                   |
| ZNF417       | 0.762463328                            | N                                            | 0                                      | N                                   |
| VSIG10L      | 0.762488774                            | N                                            | 0                                      | N                                   |
| ACVRL1       | 0.762557594                            | N                                            | 1                                      | N                                   |
| AL589642.2   | 0.762557594                            | N                                            | 0                                      | N                                   |
| C10orf107    | 0.762557594                            | N                                            | 0                                      | N                                   |
| CASC15       | 0.762557594                            | N                                            | 0                                      | N                                   |
| EMP3         | 0.762557594                            | N                                            | 2                                      | N                                   |
| GHDC         | 0.762557594                            | N                                            | 2                                      | N                                   |
| RN7SL1       | 0.762557594                            | N                                            | 0                                      | N                                   |
| SLC16A11     | 0.762557594                            | N                                            | 8                                      | N                                   |
| TACO1        | 0.762557594                            | N                                            | 0                                      | N                                   |
| UCN          | 0.762557594                            | N                                            | 34                                     | N                                   |
| YAF2         | 0.762557594                            | N                                            | 0                                      | N                                   |
| HNRNPKP1     | 0.762563461                            | N                                            | 0                                      | N                                   |
| TNNT1        | 0.762563461                            | N                                            | 0                                      | N                                   |
| MRPL1        | 0.762675779                            | N                                            | 0                                      | N                                   |
| LINC00470    | 0.762761491                            | N                                            | 0                                      | N                                   |
| AC002480.1   | 0.762928492                            | N                                            | 0                                      | N                                   |
| ALG5         | 0.762928492                            | N                                            | 0                                      | N                                   |
| C10orf12     | 0.762928492                            | N                                            | 0                                      | N                                   |
| DSCR9        | 0.762928492                            | N                                            | 0                                      | N                                   |
| GLRX3P2      | 0.762928492                            | N                                            | 0                                      | N                                   |
| PTBP1        | 0.762928492                            | N                                            | 10                                     | N                                   |
| SLC6A7       | 0.762928492                            | N                                            | 0                                      | N                                   |
| ANKRD13B     | 0.763118312                            | N                                            | 0                                      | N                                   |

| Gene symbols | FDR (differential expression analysis) | Differentially expressed gene? Y, Yes; N, No | Number of insulin related publications | Insulin related gene? Y, Yes; N, No |
|--------------|----------------------------------------|----------------------------------------------|----------------------------------------|-------------------------------------|
| AC092745.1   | 0.763136581                            | N                                            | 0                                      | N                                   |
| CTNNA1       | 0.763136581                            | N                                            | 11                                     | N                                   |
| LINC00840    | 0.763136581                            | N                                            | 0                                      | N                                   |
| NPHP3-ACAD11 | 0.763136581                            | N                                            | 0                                      | N                                   |
| PLSCR1       | 0.763136581                            | N                                            | 2                                      | N                                   |
| TIMM8B       | 0.763136581                            | N                                            | 0                                      | N                                   |
| ZDHHC2       | 0.763136581                            | N                                            | 0                                      | N                                   |
| ZFAND2B      | 0.763136581                            | N                                            | 3                                      | N                                   |
| ZFP41        | 0.763136581                            | N                                            | 0                                      | N                                   |
| USP19        | 0.763144752                            | N                                            | 2                                      | N                                   |
| LINC01355    | 0.763163855                            | N                                            | 0                                      | N                                   |
| MRPS6        | 0.763163855                            | N                                            | 0                                      | N                                   |
| CD38         | 0.763177914                            | N                                            | 102                                    | Y                                   |
| FMNL3        | 0.763177914                            | N                                            | 0                                      | N                                   |
| GTF2H3       | 0.763177914                            | N                                            | 0                                      | N                                   |
| MIB1         | 0.763177914                            | N                                            | 10                                     | N                                   |
| AL359921.2   | 0.763235853                            | N                                            | 0                                      | N                                   |
| TXNP6        | 0.763235853                            | N                                            | 0                                      | N                                   |
| DAGLA        | 0.763254401                            | N                                            | 1                                      | N                                   |
| GIMAP2       | 0.763254401                            | N                                            | 0                                      | N                                   |
| IL27RA       | 0.763254401                            | N                                            | 3                                      | N                                   |
| MYO7A        | 0.763254401                            | N                                            | 6                                      | N                                   |
| AC036176.2   | 0.763319883                            | N                                            | 0                                      | N                                   |
| AL357033.4   | 0.763319883                            | N                                            | 0                                      | N                                   |
| CFAP65       | 0.763319883                            | N                                            | 0                                      | N                                   |
| DNAH17-AS1   | 0.763319883                            | N                                            | 0                                      | N                                   |
| KIAA1549L    | 0.763319883                            | N                                            | 0                                      | N                                   |
| LGSN         | 0.763319883                            | N                                            | 0                                      | N                                   |
| RPS27        | 0.763319883                            | N                                            | 1                                      | N                                   |
| TMEM151A     | 0.763319883                            | N                                            | 0                                      | N                                   |
| TPM4         | 0.763319883                            | N                                            | 1                                      | N                                   |
| UPF3A        | 0.763319883                            | N                                            | 0                                      | N                                   |
| UTP15        | 0.763319883                            | N                                            | 0                                      | N                                   |
| VPS9D1       | 0.763319883                            | N                                            | 0                                      | N                                   |
| PATE2        | 0.76336171                             | N                                            | 0                                      | N                                   |
| ZNF134       | 0.763407424                            | N                                            | 0                                      | N                                   |
| CDC37        | 0.763452657                            | N                                            | 7                                      | N                                   |
| TNFRSF14-AS1 | 0.763452657                            | N                                            | 0                                      | N                                   |
| CTBP1        | 0.763939434                            | N                                            | 2                                      | N                                   |
| HLA-DMB      | 0.764161905                            | N                                            | 4                                      | N                                   |
| AC079174.2   | 0.764365166                            | N                                            | 0                                      | N                                   |
| RILP         | 0.764447881                            | N                                            | 3                                      | N                                   |
| C8orf44-SGK3 | 0.764523954                            | N                                            | 0                                      | N                                   |
| ISY1         | 0.764523954                            | N                                            | 0                                      | N                                   |
| AC087359.1   | 0.764556974                            | N                                            | 0                                      | N                                   |
| AC022915.1   | 0.764591178                            | N                                            | 0                                      | N                                   |
| AL162231.4   | 0.764591178                            | N                                            | 0                                      | N                                   |
| LIPE-AS1     | 0.764591178                            | N                                            | 0                                      | N                                   |
| RN7SL431P    | 0.764591178                            | N                                            | 0                                      | N                                   |
| UNC79        | 0.764591178                            | N                                            | 0                                      | N                                   |
| AC118658.2   | 0.764661663                            | N                                            | 0                                      | N                                   |
| ELOVL7       | 0.764661663                            | N                                            | 2                                      | N                                   |
| GPAT2        | 0.764661663                            | N                                            | 4                                      | N                                   |
| HES6         | 0.764661663                            | N                                            | 4                                      | N                                   |
| PANK4        | 0.764661663                            | N                                            | 1                                      | N                                   |
| SPESP1       | 0.764661663                            | N                                            | 2                                      | N                                   |
| SRRM1        | 0.764661663                            | N                                            | 0                                      | N                                   |
| TOP2B        | 0.764661663                            | N                                            | 0                                      | N                                   |
| ZFP91        | 0.764661663                            | N                                            | 1                                      | N                                   |
| FAM217A      | 0.764775171                            | N                                            | 0                                      | N                                   |
| LBX2         | 0.764775171                            | N                                            | 0                                      | N                                   |
| GTF2E1       | 0.765059053                            | N                                            | 0                                      | N                                   |
| TBX4         | 0.765110073                            | N                                            | 0                                      | N                                   |
| AC026124.1   | 0.765192825                            | N                                            | 0                                      | N                                   |
| CCL26        | 0.765315924                            | N                                            | 3                                      | N                                   |
| PDGFRA       | 0.765315924                            | N                                            | 42                                     | N                                   |

| Gene symbols  | FDR (differential expression analysis) | Differentially expressed gene? Y, Yes; N, No | Number of insulin related publications | Insulin related gene? Y, Yes; N, No |
|---------------|----------------------------------------|----------------------------------------------|----------------------------------------|-------------------------------------|
| AC018868.2    | 0.765513588                            | N                                            | 0                                      | N                                   |
| AL160236.2    | 0.765513588                            | N                                            | 0                                      | N                                   |
| CCZ1B         | 0.765513588                            | N                                            | 0                                      | N                                   |
| CDC42EP1      | 0.765513588                            | N                                            | 0                                      | N                                   |
| CTD-2231H16.1 | 0.765513588                            | N                                            | 0                                      | N                                   |
| GLYATL1       | 0.765513588                            | N                                            | 0                                      | N                                   |
| HARBI1        | 0.765513588                            | N                                            | 0                                      | N                                   |
| HIST2H2BE     | 0.765513588                            | N                                            | 0                                      | N                                   |
| NMI           | 0.765513588                            | N                                            | 9                                      | N                                   |
| PTGDS         | 0.765513588                            | N                                            | 1                                      | N                                   |
| SLC4A8        | 0.765513588                            | N                                            | 0                                      | N                                   |
| SPINT2        | 0.765513588                            | N                                            | 4                                      | N                                   |
| AC064807.1    | 0.765546895                            | N                                            | 0                                      | N                                   |
| SMG7-AS1      | 0.765632014                            | N                                            | 0                                      | N                                   |
| TMTC4         | 0.765632014                            | N                                            | 0                                      | N                                   |
| AC112512.1    | 0.765664486                            | N                                            | 0                                      | N                                   |
| AC135721.2    | 0.765664486                            | N                                            | 0                                      | N                                   |
| GORASP1       | 0.765664486                            | N                                            | 0                                      | N                                   |
| KHDRBS1       | 0.765664486                            | N                                            | 10                                     | N                                   |
| C7orf50       | 0.765754188                            | N                                            | 0                                      | N                                   |
| UBE2D3        | 0.765754188                            | N                                            | 2                                      | N                                   |
| CTDSP1        | 0.765777168                            | N                                            | 2                                      | N                                   |
| KCNA4         | 0.765809765                            | N                                            | 4                                      | N                                   |
| SAG           | 0.765809765                            | N                                            | 27                                     | N                                   |
| PSMC1P1       | 0.765884659                            | N                                            | 0                                      | N                                   |
| SGMS2         | 0.765884659                            | N                                            | 0                                      | N                                   |
| AC132219.2    | 0.765934907                            | N                                            | 0                                      | N                                   |
| AC138028.4    | 0.765934907                            | N                                            | 0                                      | N                                   |
| AL391256.1    | 0.765934907                            | N                                            | 0                                      | N                                   |
| ALDH7A1       | 0.765934907                            | N                                            | 2                                      | N                                   |
| BOLA2P3       | 0.765934907                            | N                                            | 0                                      | N                                   |
| ID3           | 0.765934907                            | N                                            | 20                                     | N                                   |
| UBE2V1        | 0.765934907                            | N                                            | 1                                      | N                                   |
| UBQLN4        | 0.765934907                            | N                                            | 0                                      | N                                   |
| AP1S3         | 0.766071917                            | N                                            | 0                                      | N                                   |
| RNF133        | 0.766253875                            | N                                            | 0                                      | N                                   |
| ACIN1         | 0.766290696                            | N                                            | 2                                      | N                                   |
| CYB5A         | 0.766403605                            | N                                            | 2                                      | N                                   |
| AIF1L         | 0.766571459                            | N                                            | 0                                      | N                                   |
| AL359922.3    | 0.766571459                            | N                                            | 0                                      | N                                   |
| ARHGAP15      | 0.766571459                            | N                                            | 0                                      | N                                   |
| RN7SL96P      | 0.766692841                            | N                                            | 0                                      | N                                   |
| TTBK2         | 0.766692841                            | N                                            | 0                                      | N                                   |
| TP53I3        | 0.76670056                             | N                                            | 1                                      | N                                   |
| INTS6P1       | 0.766702538                            | N                                            | 0                                      | N                                   |
| SCO2          | 0.766702538                            | N                                            | 4                                      | N                                   |
| AC011447.7    | 0.766879383                            | N                                            | 0                                      | N                                   |
| GCKR          | 0.766879383                            | N                                            | 102                                    | Y                                   |
| NUAK2         | 0.766879383                            | N                                            | 4                                      | N                                   |
| SETP14        | 0.766879383                            | N                                            | 0                                      | N                                   |
| AC005833.1    | 0.766887065                            | N                                            | 0                                      | N                                   |
| CYP4A22-AS1   | 0.766887065                            | N                                            | 0                                      | N                                   |
| HNRNPD        | 0.766887065                            | N                                            | 0                                      | N                                   |
| ZNF501        | 0.766887065                            | N                                            | 0                                      | N                                   |
| AL121772.1    | 0.766953179                            | N                                            | 0                                      | N                                   |
| TRPV4         | 0.767125858                            | N                                            | 20                                     | N                                   |
| NDUFB10P2     | 0.767136221                            | N                                            | 0                                      | N                                   |
| WWP1P1        | 0.767205322                            | N                                            | 0                                      | N                                   |
| DUX4          | 0.767268915                            | N                                            | 1                                      | N                                   |
| GORAB         | 0.767281763                            | N                                            | 0                                      | N                                   |
| MRPL32        | 0.767329894                            | N                                            | 0                                      | N                                   |
| LRRC19        | 0.767477718                            | N                                            | 1                                      | N                                   |
| Z92544.2      | 0.767477718                            | N                                            | 0                                      | N                                   |
| AC009263.1    | 0.767533224                            | N                                            | 0                                      | N                                   |
| SHMT2         | 0.767611208                            | N                                            | 3                                      | N                                   |
| CENPQ         | 0.767682312                            | N                                            | 0                                      | N                                   |

| Gene symbols | FDR (differential expression analysis) | Differentially expressed gene? Y, Yes; N, No | Number of insulin related publications | Insulin related gene? Y, Yes; N, No |
|--------------|----------------------------------------|----------------------------------------------|----------------------------------------|-------------------------------------|
| KBTBD11      | 0.767682312                            | N                                            | 0                                      | N                                   |
| AC003101.2   | 0.767731794                            | N                                            | 0                                      | N                                   |
| AC104306.2   | 0.767731794                            | N                                            | 0                                      | N                                   |
| AP000295.1   | 0.767731794                            | N                                            | 0                                      | N                                   |
| AXIN1        | 0.767731794                            | N                                            | 3                                      | N                                   |
| B4GALT3      | 0.767731794                            | N                                            | 0                                      | N                                   |
| EDA2R        | 0.767731794                            | N                                            | 0                                      | N                                   |
| FO704657.1   | 0.767731794                            | N                                            | 0                                      | N                                   |
| FUCA2        | 0.767731794                            | N                                            | 0                                      | N                                   |
| Metazoa_SRP  | 0.767731794                            | N                                            | 0                                      | N                                   |
| NHEJ1        | 0.767731794                            | N                                            | 1                                      | N                                   |
| NOLC1        | 0.767731794                            | N                                            | 0                                      | N                                   |
| OXA1L        | 0.767731794                            | N                                            | 0                                      | N                                   |
| PRR29        | 0.767731794                            | N                                            | 0                                      | N                                   |
| RPL35P3      | 0.767731794                            | N                                            | 0                                      | N                                   |
| SAR1A        | 0.767731794                            | N                                            | 3                                      | N                                   |
| ZNF219       | 0.767731794                            | N                                            | 0                                      | N                                   |
| COL6A2       | 0.767898914                            | N                                            | 1                                      | N                                   |
| ALG3P1       | 0.767932409                            | N                                            | 0                                      | N                                   |
| PHYHIPL      | 0.767932409                            | N                                            | 0                                      | N                                   |
| TIMM13       | 0.767932409                            | N                                            | 0                                      | N                                   |
| AC006238.1   | 0.767987064                            | N                                            | 0                                      | N                                   |
| AC027141.1   | 0.767987064                            | N                                            | 0                                      | N                                   |
| AC083837.1   | 0.767987064                            | N                                            | 0                                      | N                                   |
| IL1B         | 0.767987064                            | N                                            | 178                                    | Y                                   |
| LINC00352    | 0.767987064                            | N                                            | 0                                      | N                                   |
| TLL1         | 0.767987064                            | N                                            | 4                                      | N                                   |
| XAB2         | 0.767987064                            | N                                            | 0                                      | N                                   |
| PLCZ1        | 0.768035456                            | N                                            | 1                                      | N                                   |
| PMAIP1       | 0.768035456                            | N                                            | 7                                      | N                                   |
| ADRM1        | 0.768295539                            | N                                            | 0                                      | N                                   |
| CCDC102B     | 0.768295539                            | N                                            | 0                                      | N                                   |
| NR4A2        | 0.768295539                            | N                                            | 16                                     | N                                   |
| NPM1         | 0.768366819                            | N                                            | 3                                      | N                                   |
| AC010327.3   | 0.768416922                            | N                                            | 0                                      | N                                   |
| AC111152.3   | 0.768416922                            | N                                            | 0                                      | N                                   |
| ACTR10       | 0.768416922                            | N                                            | 0                                      | N                                   |
| AL391280.1   | 0.768416922                            | N                                            | 0                                      | N                                   |
| SSR3         | 0.768416922                            | N                                            | 1                                      | N                                   |
| RRH          | 0.768452397                            | N                                            | 5                                      | N                                   |
| KCNV1        | 0.768486611                            | N                                            | 0                                      | N                                   |
| LINC01089    | 0.768486611                            | N                                            | 0                                      | N                                   |
| AC020629.1   | 0.768500511                            | N                                            | 0                                      | N                                   |
| PINLYP       | 0.768500511                            | N                                            | 0                                      | N                                   |
| AC023355.1   | 0.768511593                            | N                                            | 0                                      | N                                   |
| EHD4         | 0.768642736                            | N                                            | 2                                      | N                                   |
| AL513366.1   | 0.768673288                            | N                                            | 0                                      | N                                   |
| AC009779.2   | 0.768680095                            | N                                            | 0                                      | N                                   |
| CBR3-AS1     | 0.768680095                            | N                                            | 0                                      | N                                   |
| FAM98A       | 0.768680095                            | N                                            | 1                                      | N                                   |
| ROM1         | 0.768680095                            | N                                            | 0                                      | N                                   |
| THYN1        | 0.76891344                             | N                                            | 0                                      | N                                   |
| GAPT         | 0.769027781                            | N                                            | 3                                      | N                                   |
| RPUSD4       | 0.769199713                            | N                                            | 0                                      | N                                   |
| SPTAN1       | 0.769199713                            | N                                            | 0                                      | N                                   |
| ZNF274       | 0.769408851                            | N                                            | 1                                      | N                                   |
| NUDT7        | 0.769610566                            | N                                            | 0                                      | N                                   |
| LINC01209    | 0.769673109                            | N                                            | 0                                      | N                                   |
| PDPK2P       | 0.769673109                            | N                                            | 0                                      | N                                   |
| FAM86C1      | 0.769680345                            | N                                            | 0                                      | N                                   |
| AC007182.2   | 0.769747885                            | N                                            | 0                                      | N                                   |
| AC027544.1   | 0.769747885                            | N                                            | 0                                      | N                                   |
| AC092447.9   | 0.769747885                            | N                                            | 0                                      | N                                   |
| FAM204CP     | 0.769747885                            | N                                            | 0                                      | N                                   |
| IL31RA       | 0.769747885                            | N                                            | 1                                      | N                                   |
| LINC02551    | 0.769747885                            | N                                            | 0                                      | N                                   |

| Gene symbols | FDR (differential expression analysis) | Differentially expressed gene? Y, Yes; N, No | Number of insulin related publications | Insulin related gene? Y, Yes; N, No |
|--------------|----------------------------------------|----------------------------------------------|----------------------------------------|-------------------------------------|
| NXT2         | 0.769747885                            | N                                            | 0                                      | N                                   |
| OTP          | 0.769747885                            | N                                            | 4                                      | N                                   |
| PDK3         | 0.769747885                            | N                                            | 7                                      | N                                   |
| PIPOX        | 0.769747885                            | N                                            | 0                                      | N                                   |
| RTCB         | 0.769747885                            | N                                            | 0                                      | N                                   |
| FBXO2        | 0.769790095                            | N                                            | 1                                      | N                                   |
| PNMA6A       | 0.769810643                            | N                                            | 0                                      | N                                   |
| ZNF704       | 0.769810643                            | N                                            | 0                                      | N                                   |
| AC068152.1   | 0.76992804                             | N                                            | 0                                      | N                                   |
| ELP4         | 0.76992804                             | N                                            | 0                                      | N                                   |
| AL137845.2   | 0.769928619                            | N                                            | 0                                      | N                                   |
| AL513523.1   | 0.769928619                            | N                                            | 0                                      | N                                   |
| HNRNPCP4     | 0.769928619                            | N                                            | 0                                      | N                                   |
| ITPA         | 0.769928619                            | N                                            | 4                                      | N                                   |
| OTUD7B       | 0.769928619                            | N                                            | 1                                      | N                                   |
| SLC35A1      | 0.769928619                            | N                                            | 0                                      | N                                   |
| SNX30        | 0.769928619                            | N                                            | 0                                      | N                                   |
| ARL3         | 0.769933374                            | N                                            | 0                                      | N                                   |
| PRKCA-AS1    | 0.770030744                            | N                                            | 0                                      | N                                   |
| CPSF1P1      | 0.770039791                            | N                                            | 0                                      | N                                   |
| NARS2        | 0.770044538                            | N                                            | 0                                      | N                                   |
| AC104393.1   | 0.770070259                            | N                                            | 0                                      | N                                   |
| AL132639.2   | 0.770070259                            | N                                            | 0                                      | N                                   |
| ISLR         | 0.770070259                            | N                                            | 2                                      | N                                   |
| LARGE1       | 0.770070259                            | N                                            | 1                                      | N                                   |
| RNF144A-AS1  | 0.770070259                            | N                                            | 0                                      | N                                   |
| SPRY2        | 0.770070259                            | N                                            | 12                                     | N                                   |
| TRAPPC2L     | 0.770070259                            | N                                            | 0                                      | N                                   |
| AC122129.1   | 0.770072972                            | N                                            | 0                                      | N                                   |
| KRT19P2      | 0.770072972                            | N                                            | 0                                      | N                                   |
| AC040160.1   | 0.770132326                            | N                                            | 0                                      | N                                   |
| AC073389.3   | 0.770132326                            | N                                            | 0                                      | N                                   |
| AC092368.2   | 0.770132326                            | N                                            | 0                                      | N                                   |
| AC096711.2   | 0.770132326                            | N                                            | 0                                      | N                                   |
| AC107398.1   | 0.770132326                            | N                                            | 0                                      | N                                   |
| ALG10B       | 0.770132326                            | N                                            | 0                                      | N                                   |
| CEP95        | 0.770132326                            | N                                            | 0                                      | N                                   |
| KCNE1        | 0.770132326                            | N                                            | 14                                     | N                                   |
| SEC24C       | 0.770132326                            | N                                            | 0                                      | N                                   |
| SELENBP1     | 0.770132326                            | N                                            | 1                                      | N                                   |
| SHROOM3      | 0.770132326                            | N                                            | 2                                      | N                                   |
| XIAPP3       | 0.770132326                            | N                                            | 0                                      | N                                   |
| AC112694.2   | 0.770314932                            | N                                            | 0                                      | N                                   |
| SPG7         | 0.7704525                              | N                                            | 1                                      | N                                   |
| RB1          | 0.770553713                            | N                                            | 57                                     | N                                   |
| RN7SL481P    | 0.770553713                            | N                                            | 0                                      | N                                   |
| SLC12A6      | 0.770553713                            | N                                            | 3                                      | N                                   |
| SPRY4-AS1    | 0.770553713                            | N                                            | 0                                      | N                                   |
| AC079331.1   | 0.77056316                             | N                                            | 0                                      | N                                   |
| AP001000.1   | 0.77056316                             | N                                            | 0                                      | N                                   |
| ATG4B        | 0.77056316                             | N                                            | 4                                      | N                                   |
| H1F0         | 0.77056316                             | N                                            | 0                                      | N                                   |
| ITFG2-AS1    | 0.77056316                             | N                                            | 0                                      | N                                   |
| SMIM11P1     | 0.77056316                             | N                                            | 0                                      | N                                   |
| TMEM123      | 0.77056316                             | N                                            | 0                                      | N                                   |
| TRIM34       | 0.77056316                             | N                                            | 0                                      | N                                   |
| WBP11        | 0.77056316                             | N                                            | 0                                      | N                                   |
| AC021321.1   | 0.770657035                            | N                                            | 0                                      | N                                   |
| OARD1        | 0.770657035                            | N                                            | 1                                      | N                                   |
| CLK3         | 0.770759453                            | N                                            | 0                                      | N                                   |
| BRD9P2       | 0.770838733                            | N                                            | 0                                      | N                                   |
| AL109976.1   | 0.770901753                            | N                                            | 0                                      | N                                   |
| AC063947.2   | 0.770946556                            | N                                            | 0                                      | N                                   |
| TBX1         | 0.771010065                            | N                                            | 14                                     | N                                   |
| BX664727.3   | 0.771076256                            | N                                            | 0                                      | N                                   |
| EWSR1        | 0.771121368                            | N                                            | 10                                     | N                                   |

| Gene symbols | FDR (differential expression analysis) | Differentially expressed gene? Y, Yes; N, No | Number of insulin related publications | Insulin related gene? Y, Yes; N, No |
|--------------|----------------------------------------|----------------------------------------------|----------------------------------------|-------------------------------------|
| MIR4435-2HG  | 0.771121368                            | N                                            | 0                                      | N                                   |
| ANKRD31      | 0.771318672                            | N                                            | 0                                      | N                                   |
| AP001267.2   | 0.771379423                            | N                                            | 0                                      | N                                   |
| AL109923.1   | 0.771686567                            | N                                            | 0                                      | N                                   |
| ATXN2-AS     | 0.771716159                            | N                                            | 0                                      | N                                   |
| RNF123       | 0.771716159                            | N                                            | 1                                      | N                                   |
| STK19        | 0.771716159                            | N                                            | 1                                      | N                                   |
| GPR158       | 0.771779627                            | N                                            | 0                                      | N                                   |
| LINC01011    | 0.771828                               | N                                            | 0                                      | N                                   |
| PELP1        | 0.771979765                            | N                                            | 4                                      | N                                   |
| PGLS         | 0.771979765                            | N                                            | 5                                      | N                                   |
| TOMM20       | 0.771979765                            | N                                            | 1                                      | N                                   |
| AC009120.1   | 0.772099786                            | N                                            | 0                                      | N                                   |
| EMC6         | 0.772118356                            | N                                            | 0                                      | N                                   |
| FKBP9        | 0.772124791                            | N                                            | 0                                      | N                                   |
| KLHL34       | 0.77214334                             | N                                            | 0                                      | N                                   |
| COPG2        | 0.772193665                            | N                                            | 0                                      | N                                   |
| PET117       | 0.772193665                            | N                                            | 0                                      | N                                   |
| MINOS1-NBL1  | 0.772220402                            | N                                            | 0                                      | N                                   |
| OMA1         | 0.772220402                            | N                                            | 3                                      | N                                   |
| RUNDC3A-AS1  | 0.772220402                            | N                                            | 0                                      | N                                   |
| TSC2         | 0.772220402                            | N                                            | 193                                    | Y                                   |
| TXNL4B       | 0.772220402                            | N                                            | 0                                      | N                                   |
| MAPKAP1      | 0.772372185                            | N                                            | 6                                      | N                                   |
| GRIA1        | 0.772598174                            | N                                            | 1                                      | N                                   |
| RNF19B       | 0.772598174                            | N                                            | 0                                      | N                                   |
| RBP4         | 0.772614938                            | N                                            | 555                                    | Y                                   |
| WDR27        | 0.772614938                            | N                                            | 0                                      | N                                   |
| CD177        | 0.772845681                            | N                                            | 1                                      | N                                   |
| MYL6P5       | 0.772845681                            | N                                            | 0                                      | N                                   |
| CDKL1        | 0.77293441                             | N                                            | 0                                      | N                                   |
| ENY2         | 0.772940871                            | N                                            | 1                                      | N                                   |
| AL356432.2   | 0.772957285                            | N                                            | 0                                      | N                                   |
| DDIT4L       | 0.772957285                            | N                                            | 2                                      | N                                   |
| HNMT         | 0.772957285                            | N                                            | 1                                      | N                                   |
| HYAL2        | 0.772957285                            | N                                            | 1                                      | N                                   |
| MALRD1       | 0.772957285                            | N                                            | 0                                      | N                                   |
| MTX3         | 0.772957285                            | N                                            | 0                                      | N                                   |
| NPAS2        | 0.772957285                            | N                                            | 12                                     | N                                   |
| SBDS         | 0.772957285                            | N                                            | 3                                      | N                                   |
| ZSWIM4       | 0.772957285                            | N                                            | 0                                      | N                                   |
| ETFIP3       | 0.772976198                            | N                                            | 0                                      | N                                   |
| CREG2        | 0.772996427                            | N                                            | 0                                      | N                                   |
| CHST12       | 0.773057061                            | N                                            | 0                                      | N                                   |
| FEZ1         | 0.773057061                            | N                                            | 0                                      | N                                   |
| SYS1-DBNDD2  | 0.773057061                            | N                                            | 0                                      | N                                   |
| HDAC10       | 0.773338283                            | N                                            | 2                                      | N                                   |
| PRR26        | 0.773364314                            | N                                            | 0                                      | N                                   |
| AC009302.1   | 0.773597026                            | N                                            | 0                                      | N                                   |
| AC093909.1   | 0.773597026                            | N                                            | 0                                      | N                                   |
| AC099805.1   | 0.773597026                            | N                                            | 0                                      | N                                   |
| AC245060.5   | 0.773597026                            | N                                            | 0                                      | N                                   |
| GMFB         | 0.773597026                            | N                                            | 0                                      | N                                   |
| LRRC34       | 0.773597026                            | N                                            | 0                                      | N                                   |
| MKRN4P       | 0.773597026                            | N                                            | 0                                      | N                                   |
| PPP3R1       | 0.773597026                            | N                                            | 3                                      | N                                   |
| TPTE2P5      | 0.773597026                            | N                                            | 0                                      | N                                   |
| ZNF174       | 0.773895145                            | N                                            | 1                                      | N                                   |
| NBL1         | 0.773896167                            | N                                            | 0                                      | N                                   |
| SERPINB1     | 0.773896167                            | N                                            | 7                                      | N                                   |
| AL138713.1   | 0.773937375                            | N                                            | 0                                      | N                                   |
| AP001528.2   | 0.773937375                            | N                                            | 0                                      | N                                   |
| POLN         | 0.77421485                             | N                                            | 0                                      | N                                   |
| FKBP8        | 0.774329792                            | N                                            | 5                                      | N                                   |
| MAGIX        | 0.774341778                            | N                                            | 0                                      | N                                   |
| INSR         | 0.774391441                            | N                                            | 911                                    | Y                                   |

| Gene symbols | FDR (differential expression analysis) | Differentially expressed gene? Y, Yes; N, No | Number of insulin related publications | Insulin related gene? Y, Yes; N, No |
|--------------|----------------------------------------|----------------------------------------------|----------------------------------------|-------------------------------------|
| AP000873.3   | 0.774555487                            | N                                            | 0                                      | N                                   |
| AC006033.1   | 0.77466456                             | N                                            | 0                                      | N                                   |
| AC006449.5   | 0.77466456                             | N                                            | 0                                      | N                                   |
| AC090673.1   | 0.77466456                             | N                                            | 0                                      | N                                   |
| AC121761.2   | 0.77466456                             | N                                            | 0                                      | N                                   |
| AC132872.2   | 0.77466456                             | N                                            | 0                                      | N                                   |
| AL161773.1   | 0.77466456                             | N                                            | 0                                      | N                                   |
| AL359715.5   | 0.77466456                             | N                                            | 0                                      | N                                   |
| AL589684.1   | 0.77466456                             | N                                            | 0                                      | N                                   |
| AL591030.1   | 0.77466456                             | N                                            | 0                                      | N                                   |
| CASC8        | 0.77466456                             | N                                            | 0                                      | N                                   |
| COL9A3       | 0.77466456                             | N                                            | 1                                      | N                                   |
| ESRRAP1      | 0.77466456                             | N                                            | 0                                      | N                                   |
| FAM210A      | 0.77466456                             | N                                            | 0                                      | N                                   |
| GLMN         | 0.77466456                             | N                                            | 3                                      | N                                   |
| HRH4         | 0.77466456                             | N                                            | 1                                      | N                                   |
| KATNAL1      | 0.77466456                             | N                                            | 0                                      | N                                   |
| KIAA1614-AS1 | 0.77466456                             | N                                            | 0                                      | N                                   |
| KYAT1        | 0.77466456                             | N                                            | 0                                      | N                                   |
| L3MBTL2      | 0.77466456                             | N                                            | 0                                      | N                                   |
| LHFPL2       | 0.77466456                             | N                                            | 0                                      | N                                   |
| MAN1B1       | 0.77466456                             | N                                            | 0                                      | N                                   |
| NGLY1        | 0.77466456                             | N                                            | 0                                      | N                                   |
| NT5C1B       | 0.77466456                             | N                                            | 0                                      | N                                   |
| OLIG2        | 0.77466456                             | N                                            | 18                                     | N                                   |
| PRAF2        | 0.77466456                             | N                                            | 0                                      | N                                   |
| RETREG2      | 0.77466456                             | N                                            | 0                                      | N                                   |
| RPL31        | 0.77466456                             | N                                            | 1                                      | N                                   |
| AC109925.1   | 0.774703402                            | N                                            | 0                                      | N                                   |
| IQCH-AS1     | 0.7747151                              | N                                            | 0                                      | N                                   |
| LINC01697    | 0.7747151                              | N                                            | 0                                      | N                                   |
| CAPN15       | 0.774751429                            | N                                            | 0                                      | N                                   |
| DSTNP1       | 0.774985875                            | N                                            | 0                                      | N                                   |
| TPRA1        | 0.774985875                            | N                                            | 0                                      | N                                   |
| ARMC12       | 0.77506684                             | N                                            | 0                                      | N                                   |
| SLC7A11      | 0.77506684                             | N                                            | 5                                      | N                                   |
| EEF1A1P19    | 0.775212034                            | N                                            | 0                                      | N                                   |
| AC005839.1   | 0.775407818                            | N                                            | 0                                      | N                                   |
| AC019186.1   | 0.775407818                            | N                                            | 0                                      | N                                   |
| AC096921.2   | 0.775407818                            | N                                            | 0                                      | N                                   |
| AC113398.1   | 0.775407818                            | N                                            | 0                                      | N                                   |
| AC124016.1   | 0.775407818                            | N                                            | 0                                      | N                                   |
| AL160408.3   | 0.775407818                            | N                                            | 0                                      | N                                   |
| RAD54L2      | 0.775407818                            | N                                            | 0                                      | N                                   |
| RPS23        | 0.775407818                            | N                                            | 0                                      | N                                   |
| TRAF4        | 0.775407818                            | N                                            | 2                                      | N                                   |
| ZNF970P      | 0.775407818                            | N                                            | 0                                      | N                                   |
| AC067750.1   | 0.775530261                            | N                                            | 0                                      | N                                   |
| HACL1        | 0.775530261                            | N                                            | 0                                      | N                                   |
| OSTCP1       | 0.775530261                            | N                                            | 0                                      | N                                   |
| AP003385.3   | 0.775567022                            | N                                            | 0                                      | N                                   |
| MYL12A       | 0.775584048                            | N                                            | 0                                      | N                                   |
| RRN3P2       | 0.775746664                            | N                                            | 0                                      | N                                   |
| AC004988.1   | 0.77579809                             | N                                            | 0                                      | N                                   |
| AC090236.2   | 0.776021202                            | N                                            | 0                                      | N                                   |
| MGST3        | 0.776021202                            | N                                            | 2                                      | N                                   |
| NOL10        | 0.776021202                            | N                                            | 0                                      | N                                   |
| ULBP1        | 0.776021202                            | N                                            | 0                                      | N                                   |
| AC003080.1   | 0.776149117                            | N                                            | 0                                      | N                                   |
| AC013564.1   | 0.776149117                            | N                                            | 0                                      | N                                   |
| AC114402.1   | 0.776149117                            | N                                            | 0                                      | N                                   |
| ATG5         | 0.776149117                            | N                                            | 81                                     | N                                   |
| ATP5G3       | 0.776149117                            | N                                            | 0                                      | N                                   |
| ERCC4        | 0.776149117                            | N                                            | 1                                      | N                                   |
| SYCE1        | 0.776149117                            | N                                            | 0                                      | N                                   |
| UFC1         | 0.776149117                            | N                                            | 0                                      | N                                   |



| Gene symbols | FDR (differential expression analysis) | Differentially expressed gene? Y, Yes; N, No | Number of insulin related publications | Insulin related gene? Y, Yes; N, No |
|--------------|----------------------------------------|----------------------------------------------|----------------------------------------|-------------------------------------|
| ATP6V0E1     | 0.776206892                            | N                                            | 0                                      | N                                   |
| FOXP1        | 0.776206892                            | N                                            | 9                                      | N                                   |
| TBL1X        | 0.776206892                            | N                                            | 1                                      | N                                   |
| UBXN2A       | 0.776206892                            | N                                            | 0                                      | N                                   |
| MED9         | 0.776304544                            | N                                            | 0                                      | N                                   |
| ARPC4        | 0.77635927                             | N                                            | 0                                      | N                                   |
| RPSAP58      | 0.77635927                             | N                                            | 0                                      | N                                   |
| LMAN2        | 0.776481901                            | N                                            | 0                                      | N                                   |
| PDXDC2P      | 0.776481901                            | N                                            | 0                                      | N                                   |
| AC104581.1   | 0.776558352                            | N                                            | 0                                      | N                                   |
| ZNF22        | 0.776591289                            | N                                            | 0                                      | N                                   |
| RNF4         | 0.776606864                            | N                                            | 0                                      | N                                   |
| KL           | 0.776730486                            | N                                            | 71                                     | N                                   |
| PYCR3        | 0.77676867                             | N                                            | 0                                      | N                                   |
| AL357075.2   | 0.776811179                            | N                                            | 0                                      | N                                   |
| NXP4         | 0.776884222                            | N                                            | 0                                      | N                                   |
| MPHOSPH8     | 0.776918039                            | N                                            | 0                                      | N                                   |
| AC012313.8   | 0.776923115                            | N                                            | 0                                      | N                                   |
| KHDC1        | 0.776923115                            | N                                            | 0                                      | N                                   |
| RBM19        | 0.776923115                            | N                                            | 0                                      | N                                   |
| APMAP        | 0.777102585                            | N                                            | 3                                      | N                                   |
| MSL3         | 0.777192429                            | N                                            | 0                                      | N                                   |
| AC006333.2   | 0.777228141                            | N                                            | 0                                      | N                                   |
| CCDC181      | 0.777228141                            | N                                            | 0                                      | N                                   |
| RAB3IL1      | 0.777228141                            | N                                            | 0                                      | N                                   |
| TGM4         | 0.777228141                            | N                                            | 0                                      | N                                   |
| ZNF302       | 0.777228141                            | N                                            | 0                                      | N                                   |
| AP001442.1   | 0.777306377                            | N                                            | 0                                      | N                                   |
| AC134407.3   | 0.777381003                            | N                                            | 0                                      | N                                   |
| AC011270.1   | 0.777420856                            | N                                            | 0                                      | N                                   |
| TMEM236      | 0.777420856                            | N                                            | 0                                      | N                                   |
| ZSCAN26      | 0.777420856                            | N                                            | 0                                      | N                                   |
| AC073320.1   | 0.777446612                            | N                                            | 0                                      | N                                   |
| AC073130.3   | 0.777478348                            | N                                            | 0                                      | N                                   |
| ME2          | 0.777499929                            | N                                            | 10                                     | N                                   |
| TMEM116      | 0.777499929                            | N                                            | 0                                      | N                                   |
| TCEANC2      | 0.777541028                            | N                                            | 0                                      | N                                   |
| ATE1         | 0.777554164                            | N                                            | 0                                      | N                                   |
| B3GLCT       | 0.777816159                            | N                                            | 0                                      | N                                   |
| HOMER3       | 0.777816159                            | N                                            | 0                                      | N                                   |
| ACSL3        | 0.777896776                            | N                                            | 4                                      | N                                   |
| PLLP         | 0.777896776                            | N                                            | 0                                      | N                                   |
| AL138820.1   | 0.777901469                            | N                                            | 0                                      | N                                   |
| OTX2         | 0.777901469                            | N                                            | 9                                      | N                                   |
| BTF3P10      | 0.778220961                            | N                                            | 0                                      | N                                   |
| PLEKHB2      | 0.778264044                            | N                                            | 0                                      | N                                   |
| TBC1D30      | 0.778358128                            | N                                            | 1                                      | N                                   |
| OTUD1        | 0.778665397                            | N                                            | 0                                      | N                                   |
| STPG2        | 0.778665397                            | N                                            | 0                                      | N                                   |
| TMED3        | 0.77878874                             | N                                            | 0                                      | N                                   |
| USP6         | 0.778843352                            | N                                            | 10                                     | N                                   |
| ANK2         | 0.778861413                            | N                                            | 4                                      | N                                   |
| AC010776.1   | 0.778961968                            | N                                            | 0                                      | N                                   |
| CCDC125      | 0.778961968                            | N                                            | 0                                      | N                                   |
| ICAM5        | 0.778961968                            | N                                            | 0                                      | N                                   |
| SPSB4        | 0.778961968                            | N                                            | 0                                      | N                                   |
| AAR2         | 0.778964275                            | N                                            | 0                                      | N                                   |
| CYP11A1      | 0.778969854                            | N                                            | 166                                    | Y                                   |
| DNM1L        | 0.778979527                            | N                                            | 37                                     | N                                   |
| ERICH6       | 0.778979527                            | N                                            | 0                                      | N                                   |
| AC073912.2   | 0.779228237                            | N                                            | 0                                      | N                                   |
| EGFR-AS1     | 0.779228237                            | N                                            | 0                                      | N                                   |
| GRAMD1A      | 0.779228237                            | N                                            | 0                                      | N                                   |
| HECTD1       | 0.779228237                            | N                                            | 2                                      | N                                   |
| LDLR         | 0.779228237                            | N                                            | 313                                    | Y                                   |
| NISCH        | 0.779228237                            | N                                            | 10                                     | N                                   |

| Gene symbols   | FDR (differential expression analysis) | Differentially expressed gene? Y, Yes; N, No | Number of insulin related publications | Insulin related gene? Y, Yes; N, No |
|----------------|----------------------------------------|----------------------------------------------|----------------------------------------|-------------------------------------|
| AC092068.2     | 0.779281709                            | N                                            | 0                                      | N                                   |
| AC099509.2     | 0.779281709                            | N                                            | 0                                      | N                                   |
| AL132780.5     | 0.779281709                            | N                                            | 0                                      | N                                   |
| AL161772.1     | 0.779281709                            | N                                            | 0                                      | N                                   |
| AP001024.1     | 0.779281709                            | N                                            | 0                                      | N                                   |
| ITPR1-AS1      | 0.779281709                            | N                                            | 0                                      | N                                   |
| LINC01133      | 0.779281709                            | N                                            | 0                                      | N                                   |
| SMG1           | 0.779281709                            | N                                            | 1                                      | N                                   |
| WWTR1-IT1      | 0.779281709                            | N                                            | 0                                      | N                                   |
| ZNFX1          | 0.779281709                            | N                                            | 0                                      | N                                   |
| NOC2L          | 0.77933115                             | N                                            | 0                                      | N                                   |
| PPP1R14C       | 0.77933115                             | N                                            | 0                                      | N                                   |
| TALDO1         | 0.779337854                            | N                                            | 2                                      | N                                   |
| AC107959.1     | 0.779452893                            | N                                            | 0                                      | N                                   |
| DROSHA         | 0.779452893                            | N                                            | 40                                     | N                                   |
| EFCAB12        | 0.779452893                            | N                                            | 0                                      | N                                   |
| SDCCAG3        | 0.779452893                            | N                                            | 0                                      | N                                   |
| TAS2R15P       | 0.779452893                            | N                                            | 0                                      | N                                   |
| TMED4          | 0.779452893                            | N                                            | 0                                      | N                                   |
| RAB20          | 0.779562471                            | N                                            | 1                                      | N                                   |
| AC003986.2     | 0.779845079                            | N                                            | 0                                      | N                                   |
| AC004477.3     | 0.779845079                            | N                                            | 0                                      | N                                   |
| AC009163.3     | 0.779845079                            | N                                            | 0                                      | N                                   |
| AC093627.5     | 0.779845079                            | N                                            | 0                                      | N                                   |
| ADH1B          | 0.779845079                            | N                                            | 9                                      | N                                   |
| CLASRP         | 0.779845079                            | N                                            | 0                                      | N                                   |
| EIF4BP3        | 0.779845079                            | N                                            | 0                                      | N                                   |
| GS1-124K5.3    | 0.779845079                            | N                                            | 0                                      | N                                   |
| MGC16275       | 0.779845079                            | N                                            | 0                                      | N                                   |
| NSUN2          | 0.779845079                            | N                                            | 1                                      | N                                   |
| PHOX2B         | 0.779845079                            | N                                            | 10                                     | N                                   |
| RAPGEF6        | 0.779845079                            | N                                            | 1                                      | N                                   |
| RET            | 0.779845079                            | N                                            | 91                                     | N                                   |
| SPTLC3         | 0.779845079                            | N                                            | 3                                      | N                                   |
| SRSF9P1        | 0.779845079                            | N                                            | 0                                      | N                                   |
| TCAM1P         | 0.779845079                            | N                                            | 0                                      | N                                   |
| TMEM245        | 0.779845079                            | N                                            | 0                                      | N                                   |
| USP54          | 0.779845079                            | N                                            | 0                                      | N                                   |
| AC099343.2     | 0.779922263                            | N                                            | 0                                      | N                                   |
| AL008638.5     | 0.779935447                            | N                                            | 0                                      | N                                   |
| AC107990.1     | 0.780084651                            | N                                            | 0                                      | N                                   |
| ANKRD20A5P     | 0.780084651                            | N                                            | 0                                      | N                                   |
| CINP           | 0.780084651                            | N                                            | 0                                      | N                                   |
| GNMT           | 0.780084651                            | N                                            | 10                                     | N                                   |
| NRIP1          | 0.780084651                            | N                                            | 32                                     | N                                   |
| RHOA-IT1       | 0.780084651                            | N                                            | 0                                      | N                                   |
| ZNF670-ZNF695  | 0.780084651                            | N                                            | 0                                      | N                                   |
| EMX1           | 0.780101064                            | N                                            | 1                                      | N                                   |
| RASAL2-AS1     | 0.78023581                             | N                                            | 0                                      | N                                   |
| AC022413.1     | 0.78027435                             | N                                            | 0                                      | N                                   |
| AL162726.3     | 0.78027435                             | N                                            | 0                                      | N                                   |
| C7orf55-LUC7L2 | 0.78027435                             | N                                            | 0                                      | N                                   |
| CALML6         | 0.78027435                             | N                                            | 1                                      | N                                   |
| CHKB-AS1       | 0.78027435                             | N                                            | 0                                      | N                                   |
| LINGO3         | 0.78027435                             | N                                            | 0                                      | N                                   |
| LRBA           | 0.78027435                             | N                                            | 3                                      | N                                   |
| SCARNA12       | 0.78027435                             | N                                            | 0                                      | N                                   |
| SRRD           | 0.78027435                             | N                                            | 0                                      | N                                   |
| AC011475.1     | 0.780729985                            | N                                            | 0                                      | N                                   |
| GAS5-AS1       | 0.780842995                            | N                                            | 0                                      | N                                   |
| URM1           | 0.780842995                            | N                                            | 0                                      | N                                   |
| BAIAP2L2       | 0.780849465                            | N                                            | 1                                      | N                                   |
| CMC1           | 0.780849465                            | N                                            | 0                                      | N                                   |
| TMEM133        | 0.780849465                            | N                                            | 0                                      | N                                   |
| ZNF44          | 0.780849465                            | N                                            | 0                                      | N                                   |
| E2F4           | 0.780867248                            | N                                            | 14                                     | N                                   |

| Gene symbols | FDR (differential expression analysis) | Differentially expressed gene? Y, Yes; N, No | Number of insulin related publications | Insulin related gene? Y, Yes; N, No |
|--------------|----------------------------------------|----------------------------------------------|----------------------------------------|-------------------------------------|
| GLULP4       | 0.780867248                            | N                                            | 0                                      | N                                   |
| IL1RAP       | 0.780867248                            | N                                            | 4                                      | N                                   |
| RAB12        | 0.780867248                            | N                                            | 0                                      | N                                   |
| GK5          | 0.780868972                            | N                                            | 1                                      | N                                   |
| AL359091.1   | 0.780907686                            | N                                            | 0                                      | N                                   |
| PSKH1        | 0.780907686                            | N                                            | 0                                      | N                                   |
| RCN3         | 0.780907686                            | N                                            | 0                                      | N                                   |
| TSTD3        | 0.780907686                            | N                                            | 0                                      | N                                   |
| RN7SL67P     | 0.780933861                            | N                                            | 0                                      | N                                   |
| JAKMIP2      | 0.78115572                             | N                                            | 0                                      | N                                   |
| DEDD         | 0.781224842                            | N                                            | 2                                      | N                                   |
| STOX1        | 0.781224842                            | N                                            | 1                                      | N                                   |
| RN7SL398P    | 0.78123608                             | N                                            | 0                                      | N                                   |
| KRT8P4       | 0.781550459                            | N                                            | 0                                      | N                                   |
| DMRTA1       | 0.781570234                            | N                                            | 0                                      | N                                   |
| AL138999.1   | 0.781652992                            | N                                            | 0                                      | N                                   |
| AL450263.2   | 0.781652992                            | N                                            | 0                                      | N                                   |
| AMZ1         | 0.781652992                            | N                                            | 0                                      | N                                   |
| HLCS-IT1     | 0.781652992                            | N                                            | 0                                      | N                                   |
| NLK          | 0.781652992                            | N                                            | 3                                      | N                                   |
| NPBWR1       | 0.781652992                            | N                                            | 3                                      | N                                   |
| SYT7         | 0.781652992                            | N                                            | 7                                      | N                                   |
| DOK7         | 0.781689878                            | N                                            | 1                                      | N                                   |
| RIMKLB       | 0.781773019                            | N                                            | 0                                      | N                                   |
| SNX11        | 0.781876231                            | N                                            | 0                                      | N                                   |
| BUD23        | 0.781928526                            | N                                            | 0                                      | N                                   |
| FAM3A        | 0.781928526                            | N                                            | 6                                      | N                                   |
| PDE3B        | 0.781928526                            | N                                            | 93                                     | N                                   |
| AC008550.1   | 0.782396763                            | N                                            | 0                                      | N                                   |
| TATDN2       | 0.782396763                            | N                                            | 0                                      | N                                   |
| AC007364.1   | 0.782623603                            | N                                            | 0                                      | N                                   |
| AC008147.3   | 0.782623603                            | N                                            | 0                                      | N                                   |
| AC008938.1   | 0.782623603                            | N                                            | 0                                      | N                                   |
| AC009464.1   | 0.782623603                            | N                                            | 0                                      | N                                   |
| AC104590.1   | 0.782623603                            | N                                            | 0                                      | N                                   |
| ADGRD1       | 0.782623603                            | N                                            | 0                                      | N                                   |
| AL359317.2   | 0.782623603                            | N                                            | 0                                      | N                                   |
| BCL2A1       | 0.782623603                            | N                                            | 2                                      | N                                   |
| CHCHD5       | 0.782623603                            | N                                            | 0                                      | N                                   |
| GLRB         | 0.782623603                            | N                                            | 1                                      | N                                   |
| RGS20        | 0.782623603                            | N                                            | 0                                      | N                                   |
| SEC16A       | 0.782623603                            | N                                            | 1                                      | N                                   |
| STYK1        | 0.782623603                            | N                                            | 0                                      | N                                   |
| TMEM267      | 0.782623603                            | N                                            | 0                                      | N                                   |
| TRAV8-5      | 0.782623603                            | N                                            | 0                                      | N                                   |
| ZNF17        | 0.782623603                            | N                                            | 0                                      | N                                   |
| AC015813.6   | 0.782696502                            | N                                            | 0                                      | N                                   |
| AC011487.3   | 0.782744206                            | N                                            | 0                                      | N                                   |
| AC074117.1   | 0.782744206                            | N                                            | 0                                      | N                                   |
| AC083880.1   | 0.782744206                            | N                                            | 0                                      | N                                   |
| AC091982.3   | 0.782744206                            | N                                            | 0                                      | N                                   |
| ALK          | 0.782744206                            | N                                            | 111                                    | Y                                   |
| ARHGEF12     | 0.782744206                            | N                                            | 6                                      | N                                   |
| CPOX         | 0.782744206                            | N                                            | 1                                      | N                                   |
| KIF6         | 0.782744206                            | N                                            | 2                                      | N                                   |
| PDHA1        | 0.782744206                            | N                                            | 5                                      | N                                   |
| S100A13      | 0.782744206                            | N                                            | 1                                      | N                                   |
| SLIT2-IT1    | 0.782744206                            | N                                            | 0                                      | N                                   |
| ERVH48-1     | 0.782843936                            | N                                            | 0                                      | N                                   |
| NFAM1        | 0.782843936                            | N                                            | 0                                      | N                                   |
| RTF1         | 0.782843936                            | N                                            | 0                                      | N                                   |
| WLS          | 0.782843936                            | N                                            | 6                                      | N                                   |
| RNY1         | 0.782857219                            | N                                            | 0                                      | N                                   |
| AC009093.1   | 0.782912627                            | N                                            | 0                                      | N                                   |
| AC092647.5   | 0.783163217                            | N                                            | 0                                      | N                                   |
| ANO3         | 0.783163217                            | N                                            | 0                                      | N                                   |

| Gene symbols | FDR (differential expression analysis) | Differentially expressed gene? Y, Yes; N, No | Number of insulin related publications | Insulin related gene? Y, Yes; N, No |
|--------------|----------------------------------------|----------------------------------------------|----------------------------------------|-------------------------------------|
| C20orf203    | 0.783163217                            | N                                            | 0                                      | N                                   |
| MAST4-AS1    | 0.783163217                            | N                                            | 0                                      | N                                   |
| NEBL         | 0.783163217                            | N                                            | 0                                      | N                                   |
| PLOD1        | 0.783163217                            | N                                            | 0                                      | N                                   |
| PMFBP1       | 0.783163217                            | N                                            | 0                                      | N                                   |
| TYW1         | 0.783163217                            | N                                            | 0                                      | N                                   |
| AC008556.1   | 0.783220676                            | N                                            | 0                                      | N                                   |
| CCDC84       | 0.783220676                            | N                                            | 0                                      | N                                   |
| MAOA         | 0.783333489                            | N                                            | 5                                      | N                                   |
| SPHK2        | 0.783333489                            | N                                            | 12                                     | N                                   |
| TMX3         | 0.783333489                            | N                                            | 1                                      | N                                   |
| TRIM14       | 0.783333489                            | N                                            | 0                                      | N                                   |
| GHET1        | 0.783375376                            | N                                            | 1                                      | N                                   |
| AC099506.1   | 0.783449221                            | N                                            | 0                                      | N                                   |
| RIPK4        | 0.783449221                            | N                                            | 0                                      | N                                   |
| EIF5A2P1     | 0.783499093                            | N                                            | 0                                      | N                                   |
| GRIN3B       | 0.783499093                            | N                                            | 0                                      | N                                   |
| PIP5K1C      | 0.783499093                            | N                                            | 0                                      | N                                   |
| SCRG1        | 0.783499093                            | N                                            | 0                                      | N                                   |
| AL034370.1   | 0.783551506                            | N                                            | 0                                      | N                                   |
| AC011455.2   | 0.783756198                            | N                                            | 0                                      | N                                   |
| TBC1D9B      | 0.78407337                             | N                                            | 0                                      | N                                   |
| AC103760.1   | 0.784297582                            | N                                            | 0                                      | N                                   |
| NDUFV1       | 0.784297582                            | N                                            | 5                                      | N                                   |
| RPL28        | 0.784297582                            | N                                            | 0                                      | N                                   |
| RRP1B        | 0.784297582                            | N                                            | 0                                      | N                                   |
| SNORA49      | 0.784297582                            | N                                            | 0                                      | N                                   |
| AC135507.1   | 0.784430703                            | N                                            | 0                                      | N                                   |
| AL441964.1   | 0.784430703                            | N                                            | 0                                      | N                                   |
| ATP1A4       | 0.784430703                            | N                                            | 0                                      | N                                   |
| PRKACG       | 0.784430703                            | N                                            | 0                                      | N                                   |
| SELENOK      | 0.784430703                            | N                                            | 0                                      | N                                   |
| RPL27AP5     | 0.784444407                            | N                                            | 0                                      | N                                   |
| USP31        | 0.784444407                            | N                                            | 0                                      | N                                   |
| AC009502.1   | 0.784483868                            | N                                            | 0                                      | N                                   |
| AC013470.3   | 0.784483868                            | N                                            | 0                                      | N                                   |
| AC068896.1   | 0.784483868                            | N                                            | 0                                      | N                                   |
| AC099336.1   | 0.784483868                            | N                                            | 0                                      | N                                   |
| BAHD1        | 0.784483868                            | N                                            | 1                                      | N                                   |
| CITED4       | 0.784483868                            | N                                            | 1                                      | N                                   |
| GTF2IP7      | 0.784483868                            | N                                            | 0                                      | N                                   |
| KBTBD2       | 0.784483868                            | N                                            | 1                                      | N                                   |
| METTL21EP    | 0.784483868                            | N                                            | 0                                      | N                                   |
| ZNF142       | 0.784483868                            | N                                            | 0                                      | N                                   |
| CEBPD        | 0.784554298                            | N                                            | 27                                     | N                                   |
| ESM1         | 0.784554298                            | N                                            | 6                                      | N                                   |
| MFRP         | 0.784616313                            | N                                            | 0                                      | N                                   |
| CD164        | 0.785059648                            | N                                            | 1                                      | N                                   |
| HEYL         | 0.785059648                            | N                                            | 11                                     | N                                   |
| G6PC3        | 0.785155889                            | N                                            | 4                                      | N                                   |
| AL138955.1   | 0.785355618                            | N                                            | 0                                      | N                                   |
| APLP1        | 0.785355618                            | N                                            | 6                                      | N                                   |
| B4GALT4      | 0.785355618                            | N                                            | 0                                      | N                                   |
| HSBP1L1      | 0.785355618                            | N                                            | 0                                      | N                                   |
| HYOU1        | 0.785355618                            | N                                            | 1                                      | N                                   |
| LINC02362    | 0.785355618                            | N                                            | 0                                      | N                                   |
| PDE5A        | 0.785355618                            | N                                            | 5                                      | N                                   |
| STRC         | 0.785356272                            | N                                            | 1                                      | N                                   |
| AC010442.1   | 0.785408113                            | N                                            | 0                                      | N                                   |
| ITFG2        | 0.785408113                            | N                                            | 0                                      | N                                   |
| RPP25        | 0.785408113                            | N                                            | 0                                      | N                                   |
| SEPT4-AS1    | 0.785408113                            | N                                            | 0                                      | N                                   |
| ARC          | 0.785556688                            | N                                            | 381                                    | Y                                   |
| CERS4        | 0.785556688                            | N                                            | 5                                      | N                                   |
| DRG2         | 0.785556688                            | N                                            | 2                                      | N                                   |
| FBLN1        | 0.785556688                            | N                                            | 1                                      | N                                   |

| Gene symbols | FDR (differential expression analysis) | Differentially expressed gene? Y, Yes; N, No | Number of insulin related publications | Insulin related gene? Y, Yes; N, No |
|--------------|----------------------------------------|----------------------------------------------|----------------------------------------|-------------------------------------|
| MIEN1        | 0.785556688                            | N                                            | 0                                      | N                                   |
| PGD          | 0.785556688                            | N                                            | 29                                     | N                                   |
| SMYD4        | 0.785556688                            | N                                            | 0                                      | N                                   |
| AC003682.1   | 0.785607076                            | N                                            | 0                                      | N                                   |
| ENDOD1       | 0.785607076                            | N                                            | 0                                      | N                                   |
| UBE2M        | 0.785607076                            | N                                            | 2                                      | N                                   |
| AP001432.1   | 0.785694506                            | N                                            | 0                                      | N                                   |
| ADGRB1       | 0.78575265                             | N                                            | 1                                      | N                                   |
| ANAPC10P1    | 0.78575265                             | N                                            | 0                                      | N                                   |
| ATG7         | 0.78575265                             | N                                            | 104                                    | Y                                   |
| DNAJC13      | 0.78575265                             | N                                            | 0                                      | N                                   |
| HDAC9        | 0.78575265                             | N                                            | 10                                     | N                                   |
| KCNIP3       | 0.78575265                             | N                                            | 1                                      | N                                   |
| RPL18P13     | 0.78575265                             | N                                            | 0                                      | N                                   |
| SIGMAR1      | 0.78575265                             | N                                            | 1                                      | N                                   |
| UPF3AP1      | 0.78575265                             | N                                            | 0                                      | N                                   |
| GPI          | 0.785791109                            | N                                            | 322                                    | Y                                   |
| AL606834.1   | 0.785793456                            | N                                            | 0                                      | N                                   |
| CCDC107      | 0.785793456                            | N                                            | 0                                      | N                                   |
| LINC01021    | 0.785793456                            | N                                            | 0                                      | N                                   |
| CCL13        | 0.78581238                             | N                                            | 3                                      | N                                   |
| IFT74        | 0.78581238                             | N                                            | 0                                      | N                                   |
| TIMP3        | 0.78581238                             | N                                            | 29                                     | N                                   |
| KIAA0895L    | 0.785923706                            | N                                            | 0                                      | N                                   |
| SUPT4H1P2    | 0.78604309                             | N                                            | 0                                      | N                                   |
| HSPA12A      | 0.786048797                            | N                                            | 1                                      | N                                   |
| AC104819.3   | 0.786051379                            | N                                            | 0                                      | N                                   |
| DUSP14       | 0.786127355                            | N                                            | 3                                      | N                                   |
| AC006369.1   | 0.786339101                            | N                                            | 0                                      | N                                   |
| AC009220.3   | 0.786339101                            | N                                            | 0                                      | N                                   |
| AC010186.2   | 0.786339101                            | N                                            | 0                                      | N                                   |
| AC138409.2   | 0.786339101                            | N                                            | 0                                      | N                                   |
| AK5          | 0.786339101                            | N                                            | 1                                      | N                                   |
| AP000692.2   | 0.786339101                            | N                                            | 0                                      | N                                   |
| REC8         | 0.786339101                            | N                                            | 0                                      | N                                   |
| RPL13A       | 0.786339101                            | N                                            | 8                                      | N                                   |
| SPEN         | 0.786339101                            | N                                            | 0                                      | N                                   |
| TBXAS1       | 0.786339101                            | N                                            | 0                                      | N                                   |
| TMEM208      | 0.786339101                            | N                                            | 0                                      | N                                   |
| ZFP36        | 0.786339101                            | N                                            | 20                                     | N                                   |
| ZNF230       | 0.786339101                            | N                                            | 0                                      | N                                   |
| ANKRD30B     | 0.786372406                            | N                                            | 0                                      | N                                   |
| AC011447.6   | 0.786678007                            | N                                            | 0                                      | N                                   |
| AC026316.2   | 0.786678007                            | N                                            | 0                                      | N                                   |
| AC127024.5   | 0.786678007                            | N                                            | 0                                      | N                                   |
| ADIRF        | 0.786678007                            | N                                            | 1                                      | N                                   |
| ADSSL1       | 0.786678007                            | N                                            | 0                                      | N                                   |
| AL135999.2   | 0.786678007                            | N                                            | 0                                      | N                                   |
| CASTOR2      | 0.786678007                            | N                                            | 0                                      | N                                   |
| CHST3        | 0.786678007                            | N                                            | 1                                      | N                                   |
| GNG12        | 0.786678007                            | N                                            | 0                                      | N                                   |
| IGF1R        | 0.786678007                            | N                                            | 1000                                   | Y                                   |
| NGRN         | 0.786678007                            | N                                            | 0                                      | N                                   |
| REPIN1       | 0.786678007                            | N                                            | 8                                      | N                                   |
| RNH1         | 0.786678007                            | N                                            | 1                                      | N                                   |
| SMN2         | 0.786678007                            | N                                            | 8                                      | N                                   |
| SNORA80A     | 0.786678007                            | N                                            | 0                                      | N                                   |
| SOHLH2       | 0.786678007                            | N                                            | 1                                      | N                                   |
| WDR46        | 0.786678007                            | N                                            | 0                                      | N                                   |
| AC008894.3   | 0.786881145                            | N                                            | 0                                      | N                                   |
| AC005332.5   | 0.786895149                            | N                                            | 0                                      | N                                   |
| SMIM8        | 0.786895149                            | N                                            | 1                                      | N                                   |
| WDR77        | 0.786895149                            | N                                            | 0                                      | N                                   |
| AC004156.1   | 0.786923357                            | N                                            | 0                                      | N                                   |
| OSR1         | 0.786923357                            | N                                            | 6                                      | N                                   |
| AC009237.14  | 0.786949251                            | N                                            | 0                                      | N                                   |

| Gene symbols | FDR (differential expression analysis) | Differentially expressed gene? Y, Yes; N, No | Number of insulin related publications | Insulin related gene? Y, Yes; N, No |
|--------------|----------------------------------------|----------------------------------------------|----------------------------------------|-------------------------------------|
| PCDH8P1      | 0.786949251                            | N                                            | 0                                      | N                                   |
| RNVU1-19     | 0.786949251                            | N                                            | 0                                      | N                                   |
| SNHG11       | 0.786949251                            | N                                            | 0                                      | N                                   |
| EML2-AS1     | 0.787189939                            | N                                            | 0                                      | N                                   |
| CHN2         | 0.787251452                            | N                                            | 8                                      | N                                   |
| DEF8         | 0.787251452                            | N                                            | 0                                      | N                                   |
| GSTO2        | 0.787251452                            | N                                            | 0                                      | N                                   |
| LINC01544    | 0.787251452                            | N                                            | 0                                      | N                                   |
| MIGA1        | 0.787251452                            | N                                            | 0                                      | N                                   |
| PREPL        | 0.787251452                            | N                                            | 0                                      | N                                   |
| SLBP         | 0.787251452                            | N                                            | 0                                      | N                                   |
| SLC35B2      | 0.787251452                            | N                                            | 0                                      | N                                   |
| BMP5         | 0.787275774                            | N                                            | 8                                      | N                                   |
| CTRL         | 0.787542854                            | N                                            | 112                                    | Y                                   |
| AL117342.1   | 0.787625336                            | N                                            | 0                                      | N                                   |
| VEGFC        | 0.787625336                            | N                                            | 35                                     | N                                   |
| ADAMTS6      | 0.787681298                            | N                                            | 0                                      | N                                   |
| AGMAT        | 0.787681298                            | N                                            | 1                                      | N                                   |
| AP001626.1   | 0.787681298                            | N                                            | 0                                      | N                                   |
| CCNJL        | 0.787681298                            | N                                            | 0                                      | N                                   |
| PAPLN        | 0.787681298                            | N                                            | 0                                      | N                                   |
| RABL2A       | 0.787681298                            | N                                            | 0                                      | N                                   |
| SLC4A1APP1   | 0.787681298                            | N                                            | 0                                      | N                                   |
| XXYLT1       | 0.787681298                            | N                                            | 0                                      | N                                   |
| AP005131.6   | 0.787747292                            | N                                            | 0                                      | N                                   |
| BMS1P4       | 0.787747292                            | N                                            | 0                                      | N                                   |
| LINC01088    | 0.787747292                            | N                                            | 0                                      | N                                   |
| LINC01132    | 0.787747292                            | N                                            | 0                                      | N                                   |
| TMEM121      | 0.787747292                            | N                                            | 0                                      | N                                   |
| AC007114.2   | 0.78785141                             | N                                            | 0                                      | N                                   |
| NAA40        | 0.78785141                             | N                                            | 0                                      | N                                   |
| CRAT         | 0.787929215                            | N                                            | 11                                     | N                                   |
| IRF2         | 0.787958803                            | N                                            | 0                                      | N                                   |
| AC009159.3   | 0.787985599                            | N                                            | 0                                      | N                                   |
| FAM131A      | 0.78799085                             | N                                            | 0                                      | N                                   |
| PDP2         | 0.78799085                             | N                                            | 5                                      | N                                   |
| ACER3        | 0.788053238                            | N                                            | 1                                      | N                                   |
| CR392039.4   | 0.788053238                            | N                                            | 0                                      | N                                   |
| EIF3M        | 0.788053238                            | N                                            | 0                                      | N                                   |
| HCFC1R1      | 0.788053238                            | N                                            | 0                                      | N                                   |
| PGAP2        | 0.788053238                            | N                                            | 0                                      | N                                   |
| PIGM         | 0.788053238                            | N                                            | 0                                      | N                                   |
| SENP5        | 0.788053238                            | N                                            | 0                                      | N                                   |
| TAF10        | 0.788053238                            | N                                            | 0                                      | N                                   |
| ANAPC2       | 0.788133508                            | N                                            | 0                                      | N                                   |
| ABCF2        | 0.788290524                            | N                                            | 0                                      | N                                   |
| GDNF-AS1     | 0.788403891                            | N                                            | 0                                      | N                                   |
| GPR137       | 0.788403891                            | N                                            | 0                                      | N                                   |
| LINC02407    | 0.788573036                            | N                                            | 0                                      | N                                   |
| C9orf131     | 0.788695019                            | N                                            | 0                                      | N                                   |
| LGALS8-AS1   | 0.788695019                            | N                                            | 0                                      | N                                   |
| NAA38        | 0.788740999                            | N                                            | 0                                      | N                                   |
| IMP3         | 0.788764059                            | N                                            | 156                                    | Y                                   |
| TRPV6        | 0.788764059                            | N                                            | 12                                     | N                                   |
| AC025580.2   | 0.789155726                            | N                                            | 0                                      | N                                   |
| AC092691.1   | 0.789155726                            | N                                            | 0                                      | N                                   |
| AC137932.3   | 0.789155726                            | N                                            | 0                                      | N                                   |
| ADAMTS3      | 0.789155726                            | N                                            | 5                                      | N                                   |
| ATG9A        | 0.789155726                            | N                                            | 5                                      | N                                   |
| CDC37L1-AS1  | 0.789155726                            | N                                            | 0                                      | N                                   |
| CSTA         | 0.789155726                            | N                                            | 2                                      | N                                   |
| GAA          | 0.789155726                            | N                                            | 51                                     | N                                   |
| MBNL3        | 0.789155726                            | N                                            | 3                                      | N                                   |
| MIGA2        | 0.789155726                            | N                                            | 0                                      | N                                   |
| MTERF2       | 0.789155726                            | N                                            | 0                                      | N                                   |
| OCIAD2       | 0.789155726                            | N                                            | 1                                      | N                                   |

| Gene symbols | FDR (differential expression analysis) | Differentially expressed gene? Y, Yes; N, No | Number of insulin related publications | Insulin related gene? Y, Yes; N, No |
|--------------|----------------------------------------|----------------------------------------------|----------------------------------------|-------------------------------------|
| PPM1F        | 0.789155726                            | N                                            | 0                                      | N                                   |
| RCN2         | 0.789155726                            | N                                            | 0                                      | N                                   |
| SKOR1        | 0.789155726                            | N                                            | 0                                      | N                                   |
| SLC35F2      | 0.789155726                            | N                                            | 0                                      | N                                   |
| TTC9B        | 0.789155726                            | N                                            | 0                                      | N                                   |
| VEZF1P1      | 0.789155726                            | N                                            | 0                                      | N                                   |
| Z95114.2     | 0.789155726                            | N                                            | 0                                      | N                                   |
| ZNF510       | 0.789397937                            | N                                            | 0                                      | N                                   |
| TMX2P1       | 0.78974196                             | N                                            | 0                                      | N                                   |
| CPNE7        | 0.789821995                            | N                                            | 0                                      | N                                   |
| FANCF        | 0.789821995                            | N                                            | 0                                      | N                                   |
| RHPN2        | 0.789821995                            | N                                            | 0                                      | N                                   |
| AUH          | 0.789929776                            | N                                            | 22                                     | N                                   |
| GCSH         | 0.789929776                            | N                                            | 0                                      | N                                   |
| LINC01638    | 0.789932788                            | N                                            | 0                                      | N                                   |
| ADAMTSL4-AS1 | 0.789949193                            | N                                            | 0                                      | N                                   |
| TREX2        | 0.789949193                            | N                                            | 1                                      | N                                   |
| AC006970.2   | 0.789969288                            | N                                            | 0                                      | N                                   |
| ZNF415P1     | 0.790004195                            | N                                            | 0                                      | N                                   |
| ST7-AS1      | 0.790033942                            | N                                            | 0                                      | N                                   |
| ATPIF1       | 0.79015605                             | N                                            | 0                                      | N                                   |
| NAMPT        | 0.79015605                             | N                                            | 136                                    | Y                                   |
| SREK1IP1     | 0.79015605                             | N                                            | 0                                      | N                                   |
| AF241726.1   | 0.790307085                            | N                                            | 0                                      | N                                   |
| MAFF         | 0.790402004                            | N                                            | 4                                      | N                                   |
| SLC48A1      | 0.790402004                            | N                                            | 0                                      | N                                   |
| TMEM212      | 0.790402004                            | N                                            | 0                                      | N                                   |
| CCL5         | 0.790412859                            | N                                            | 123                                    | Y                                   |
| SPATA24      | 0.79050167                             | N                                            | 0                                      | N                                   |
| ASIC4        | 0.790504436                            | N                                            | 0                                      | N                                   |
| FOXF2        | 0.790504436                            | N                                            | 4                                      | N                                   |
| GMFBP1       | 0.790504436                            | N                                            | 0                                      | N                                   |
| TMA7         | 0.790504436                            | N                                            | 0                                      | N                                   |
| ACER1        | 0.790606373                            | N                                            | 1                                      | N                                   |
| AL357033.3   | 0.790606373                            | N                                            | 0                                      | N                                   |
| AP000845.1   | 0.790606373                            | N                                            | 0                                      | N                                   |
| CEBPZOS      | 0.790606373                            | N                                            | 0                                      | N                                   |
| PNKD         | 0.790606373                            | N                                            | 0                                      | N                                   |
| PRAL         | 0.790606373                            | N                                            | 18                                     | N                                   |
| SUB1P3       | 0.790606373                            | N                                            | 0                                      | N                                   |
| TCEAL9       | 0.790606373                            | N                                            | 0                                      | N                                   |
| TIGD5        | 0.790606373                            | N                                            | 0                                      | N                                   |
| USP3-AS1     | 0.790606373                            | N                                            | 0                                      | N                                   |
| AC004801.1   | 0.790619491                            | N                                            | 0                                      | N                                   |
| AL022344.1   | 0.790619491                            | N                                            | 0                                      | N                                   |
| AL137244.1   | 0.790619491                            | N                                            | 0                                      | N                                   |
| BCLAF1       | 0.790619491                            | N                                            | 1                                      | N                                   |
| GTF3C2       | 0.790619491                            | N                                            | 0                                      | N                                   |
| NID1         | 0.790619491                            | N                                            | 2                                      | N                                   |
| RBPMS-AS1    | 0.790619491                            | N                                            | 0                                      | N                                   |
| SIX2         | 0.790619491                            | N                                            | 6                                      | N                                   |
| TTC23L       | 0.790619491                            | N                                            | 0                                      | N                                   |
| ULBP3        | 0.790619491                            | N                                            | 0                                      | N                                   |
| AL032822.1   | 0.790652108                            | N                                            | 0                                      | N                                   |
| AL513302.2   | 0.790652108                            | N                                            | 0                                      | N                                   |
| BOP1         | 0.790652108                            | N                                            | 0                                      | N                                   |
| HOTTIP       | 0.790652108                            | N                                            | 3                                      | N                                   |
| TH           | 0.7908138                              | N                                            | 1000                                   | Y                                   |
| AL021155.1   | 0.791100847                            | N                                            | 0                                      | N                                   |
| AL117336.3   | 0.791100847                            | N                                            | 0                                      | N                                   |
| ZNF619       | 0.791100847                            | N                                            | 0                                      | N                                   |
| AC139530.3   | 0.791375027                            | N                                            | 0                                      | N                                   |
| SYNJ2        | 0.791375027                            | N                                            | 1                                      | N                                   |
| AC010247.1   | 0.791577867                            | N                                            | 0                                      | N                                   |
| CAPZA1       | 0.791620354                            | N                                            | 1                                      | N                                   |
| PKIG         | 0.791652582                            | N                                            | 0                                      | N                                   |

| Gene symbols | FDR (differential expression analysis) | Differentially expressed gene? Y, Yes; N, No | Number of insulin related publications | Insulin related gene? Y, Yes; N, No |
|--------------|----------------------------------------|----------------------------------------------|----------------------------------------|-------------------------------------|
| NEU1         | 0.791708768                            | N                                            | 9                                      | N                                   |
| WDR3         | 0.791708768                            | N                                            | 1                                      | N                                   |
| AC010442.2   | 0.791817025                            | N                                            | 0                                      | N                                   |
| AL161937.2   | 0.791817025                            | N                                            | 0                                      | N                                   |
| AP000525.1   | 0.791817025                            | N                                            | 0                                      | N                                   |
| FAM13B       | 0.791817025                            | N                                            | 0                                      | N                                   |
| STIM2        | 0.791817025                            | N                                            | 0                                      | N                                   |
| SPRYD4       | 0.791857812                            | N                                            | 0                                      | N                                   |
| GABRE        | 0.791983196                            | N                                            | 0                                      | N                                   |
| CLEC18A      | 0.792077779                            | N                                            | 0                                      | N                                   |
| ZBTB3        | 0.792114731                            | N                                            | 0                                      | N                                   |
| ABRAXAS2     | 0.79212918                             | N                                            | 0                                      | N                                   |
| AC138207.8   | 0.792273881                            | N                                            | 0                                      | N                                   |
| ASTN1        | 0.792273881                            | N                                            | 0                                      | N                                   |
| BRI3BP       | 0.792273881                            | N                                            | 0                                      | N                                   |
| LRRC32       | 0.792273881                            | N                                            | 0                                      | N                                   |
| NR2F1-AS1    | 0.792273881                            | N                                            | 0                                      | N                                   |
| PHBP2        | 0.792273881                            | N                                            | 0                                      | N                                   |
| TIMM10B      | 0.792273881                            | N                                            | 0                                      | N                                   |
| TCTEX1D4     | 0.792448002                            | N                                            | 0                                      | N                                   |
| LRRC37A      | 0.79267                                | N                                            | 0                                      | N                                   |
| AC009299.2   | 0.792704739                            | N                                            | 0                                      | N                                   |
| AC019322.4   | 0.792704739                            | N                                            | 0                                      | N                                   |
| AC020913.2   | 0.792704739                            | N                                            | 0                                      | N                                   |
| ACOX2        | 0.792704739                            | N                                            | 7                                      | N                                   |
| AL035404.1   | 0.792704739                            | N                                            | 0                                      | N                                   |
| C12orf49     | 0.792704739                            | N                                            | 0                                      | N                                   |
| LINC01825    | 0.792704739                            | N                                            | 0                                      | N                                   |
| MUC20        | 0.792704739                            | N                                            | 0                                      | N                                   |
| PMPCB        | 0.792704739                            | N                                            | 0                                      | N                                   |
| POLR3F       | 0.792704739                            | N                                            | 0                                      | N                                   |
| SP140        | 0.792704739                            | N                                            | 0                                      | N                                   |
| TNFSF13B     | 0.792704739                            | N                                            | 11                                     | N                                   |
| AP003419.4   | 0.792872331                            | N                                            | 0                                      | N                                   |
| AC009831.2   | 0.792907002                            | N                                            | 0                                      | N                                   |
| AC068448.1   | 0.792907002                            | N                                            | 0                                      | N                                   |
| ADCY5        | 0.792907002                            | N                                            | 32                                     | N                                   |
| NTPCR        | 0.792907002                            | N                                            | 0                                      | N                                   |
| SNHG3        | 0.793005196                            | N                                            | 0                                      | N                                   |
| MRRF         | 0.793069202                            | N                                            | 0                                      | N                                   |
| ZNF684       | 0.793069202                            | N                                            | 0                                      | N                                   |
| AK6          | 0.793071299                            | N                                            | 0                                      | N                                   |
| DMAC1        | 0.793071299                            | N                                            | 0                                      | N                                   |
| EIF3IP1      | 0.793071299                            | N                                            | 0                                      | N                                   |
| ERVMER34-1   | 0.793071299                            | N                                            | 0                                      | N                                   |
| OGFOD1       | 0.793071299                            | N                                            | 0                                      | N                                   |
| PHLDB3       | 0.793071299                            | N                                            | 0                                      | N                                   |
| SLC8A2       | 0.793071299                            | N                                            | 1                                      | N                                   |
| WDR72        | 0.793071299                            | N                                            | 1                                      | N                                   |
| AC004453.1   | 0.793099548                            | N                                            | 0                                      | N                                   |
| AC010240.1   | 0.793099548                            | N                                            | 0                                      | N                                   |
| AC025580.3   | 0.793099548                            | N                                            | 0                                      | N                                   |
| AC243654.3   | 0.793099548                            | N                                            | 0                                      | N                                   |
| AP000941.1   | 0.793099548                            | N                                            | 0                                      | N                                   |
| AP001972.5   | 0.793099548                            | N                                            | 0                                      | N                                   |
| APOL1        | 0.793099548                            | N                                            | 6                                      | N                                   |
| BTBD11       | 0.793099548                            | N                                            | 0                                      | N                                   |
| CSNK2A1      | 0.793099548                            | N                                            | 3                                      | N                                   |
| CUTC         | 0.793099548                            | N                                            | 0                                      | N                                   |
| EMD          | 0.793099548                            | N                                            | 42                                     | N                                   |
| EPHB3        | 0.793099548                            | N                                            | 5                                      | N                                   |
| FAM3C2       | 0.793099548                            | N                                            | 0                                      | N                                   |
| FAM91A3P     | 0.793099548                            | N                                            | 0                                      | N                                   |
| JRKL         | 0.793099548                            | N                                            | 0                                      | N                                   |
| LYPLA1       | 0.793099548                            | N                                            | 1                                      | N                                   |
| PRDX2P3      | 0.793099548                            | N                                            | 0                                      | N                                   |



| Gene symbols | FDR (differential expression analysis) | Differentially expressed gene? Y, Yes; N, No | Number of insulin related publications | Insulin related gene? Y, Yes; N, No |
|--------------|----------------------------------------|----------------------------------------------|----------------------------------------|-------------------------------------|
| SCN8A        | 0.793099548                            | N                                            | 2                                      | N                                   |
| USP36        | 0.793099548                            | N                                            | 0                                      | N                                   |
| ZSWIM8-AS1   | 0.793099548                            | N                                            | 0                                      | N                                   |
| CCDC120      | 0.793200049                            | N                                            | 0                                      | N                                   |
| CD200        | 0.793200049                            | N                                            | 7                                      | N                                   |
| GPX1         | 0.793200049                            | N                                            | 84                                     | N                                   |
| FBXL19-AS1   | 0.793225217                            | N                                            | 0                                      | N                                   |
| FAM71F2      | 0.793240672                            | N                                            | 0                                      | N                                   |
| KDM2A        | 0.793240672                            | N                                            | 0                                      | N                                   |
| HEXB         | 0.79338998                             | N                                            | 2                                      | N                                   |
| AL359258.3   | 0.793527021                            | N                                            | 0                                      | N                                   |
| EDNRA        | 0.793857247                            | N                                            | 3                                      | N                                   |
| UBQLN1       | 0.793865669                            | N                                            | 4                                      | N                                   |
| ARL10        | 0.793938775                            | N                                            | 0                                      | N                                   |
| MICAL1       | 0.793938775                            | N                                            | 0                                      | N                                   |
| AC133552.6   | 0.794042201                            | N                                            | 0                                      | N                                   |
| FAM69C       | 0.794042201                            | N                                            | 0                                      | N                                   |
| TRPM8        | 0.794349716                            | N                                            | 11                                     | N                                   |
| VWA5B1       | 0.794349716                            | N                                            | 0                                      | N                                   |
| NSF          | 0.794490296                            | N                                            | 75                                     | N                                   |
| ZNF286A      | 0.794586696                            | N                                            | 0                                      | N                                   |
| ACOT1        | 0.794670437                            | N                                            | 5                                      | N                                   |
| ANGPTL3      | 0.794670437                            | N                                            | 49                                     | N                                   |
| FHAD1        | 0.794670437                            | N                                            | 1                                      | N                                   |
| RPS26        | 0.794670437                            | N                                            | 0                                      | N                                   |
| TMEM40       | 0.794670437                            | N                                            | 0                                      | N                                   |
| CDCA4P4      | 0.794753189                            | N                                            | 0                                      | N                                   |
| DLEC1        | 0.794753189                            | N                                            | 1                                      | N                                   |
| SLC25A33     | 0.794753189                            | N                                            | 1                                      | N                                   |
| AC005520.1   | 0.794821068                            | N                                            | 0                                      | N                                   |
| AC244021.2   | 0.794821068                            | N                                            | 0                                      | N                                   |
| ATR          | 0.794821068                            | N                                            | 52                                     | N                                   |
| CHAMP1       | 0.794821068                            | N                                            | 0                                      | N                                   |
| FEM1A        | 0.794821068                            | N                                            | 3                                      | N                                   |
| HAUS1P3      | 0.794821068                            | N                                            | 0                                      | N                                   |
| KCNJ3        | 0.794821068                            | N                                            | 1                                      | N                                   |
| RPL29        | 0.794821068                            | N                                            | 2                                      | N                                   |
| RPS15A       | 0.794821068                            | N                                            | 1                                      | N                                   |
| ZNF444       | 0.794821068                            | N                                            | 0                                      | N                                   |
| AC104113.1   | 0.794843137                            | N                                            | 0                                      | N                                   |
| MZT2B        | 0.794843137                            | N                                            | 0                                      | N                                   |
| PAX6         | 0.794843137                            | N                                            | 233                                    | Y                                   |
| TFR2         | 0.794843137                            | N                                            | 3                                      | N                                   |
| VSTM2L       | 0.794843137                            | N                                            | 0                                      | N                                   |
| AC097451.1   | 0.794995768                            | N                                            | 0                                      | N                                   |
| AL445687.2   | 0.794995768                            | N                                            | 0                                      | N                                   |
| JCHAIN       | 0.794995768                            | N                                            | 0                                      | N                                   |
| KIRREL3      | 0.794995768                            | N                                            | 1                                      | N                                   |
| AC113404.3   | 0.795062786                            | N                                            | 0                                      | N                                   |
| AL121761.2   | 0.795062786                            | N                                            | 0                                      | N                                   |
| ARHGEF4      | 0.795062786                            | N                                            | 0                                      | N                                   |
| CDH18        | 0.795062786                            | N                                            | 2                                      | N                                   |
| RILPL2       | 0.795062786                            | N                                            | 0                                      | N                                   |
| ROBO4        | 0.795062786                            | N                                            | 0                                      | N                                   |
| TUBGCP2      | 0.795062786                            | N                                            | 0                                      | N                                   |
| ZNF263       | 0.795062786                            | N                                            | 0                                      | N                                   |
| LINC02389    | 0.795069112                            | N                                            | 0                                      | N                                   |
| CLEC14A      | 0.79506965                             | N                                            | 0                                      | N                                   |
| GALNT1       | 0.79506965                             | N                                            | 1                                      | N                                   |
| PAQR3        | 0.79506965                             | N                                            | 8                                      | N                                   |
| PGM5         | 0.79506965                             | N                                            | 0                                      | N                                   |
| PIGK         | 0.79506965                             | N                                            | 0                                      | N                                   |
| TAF1B        | 0.79506965                             | N                                            | 0                                      | N                                   |
| TCAP         | 0.79506965                             | N                                            | 3                                      | N                                   |
| AC004386.1   | 0.795089248                            | N                                            | 0                                      | N                                   |
| AL731577.2   | 0.795089248                            | N                                            | 0                                      | N                                   |

| Gene symbols | FDR (differential expression analysis) | Differentially expressed gene? Y, Yes; N, No | Number of insulin related publications | Insulin related gene? Y, Yes; N, No |
|--------------|----------------------------------------|----------------------------------------------|----------------------------------------|-------------------------------------|
| AVPI1        | 0.795089248                            | N                                            | 0                                      | N                                   |
| FAM227A      | 0.795089248                            | N                                            | 0                                      | N                                   |
| GEM          | 0.795089248                            | N                                            | 23                                     | N                                   |
| HERC2P9      | 0.795089248                            | N                                            | 0                                      | N                                   |
| HNRNPK       | 0.795089248                            | N                                            | 4                                      | N                                   |
| IRAK4        | 0.795089248                            | N                                            | 4                                      | N                                   |
| LPCAT4       | 0.795089248                            | N                                            | 0                                      | N                                   |
| NAIF1        | 0.795089248                            | N                                            | 0                                      | N                                   |
| PITX2        | 0.795089248                            | N                                            | 12                                     | N                                   |
| AC009404.1   | 0.795091972                            | N                                            | 0                                      | N                                   |
| AC009812.2   | 0.795091972                            | N                                            | 0                                      | N                                   |
| AC068790.6   | 0.795091972                            | N                                            | 0                                      | N                                   |
| AC126474.1   | 0.795091972                            | N                                            | 0                                      | N                                   |
| AL137014.1   | 0.795091972                            | N                                            | 0                                      | N                                   |
| AL353807.3   | 0.795091972                            | N                                            | 0                                      | N                                   |
| AL589743.1   | 0.795091972                            | N                                            | 0                                      | N                                   |
| AL596325.2   | 0.795091972                            | N                                            | 0                                      | N                                   |
| AP002469.1   | 0.795091972                            | N                                            | 0                                      | N                                   |
| C1orf64      | 0.795091972                            | N                                            | 0                                      | N                                   |
| CHCHD10      | 0.795091972                            | N                                            | 1                                      | N                                   |
| COL25A1      | 0.795091972                            | N                                            | 0                                      | N                                   |
| COX14        | 0.795091972                            | N                                            | 0                                      | N                                   |
| CPLX1        | 0.795091972                            | N                                            | 2                                      | N                                   |
| EDC3         | 0.795091972                            | N                                            | 2                                      | N                                   |
| FAM43B       | 0.795091972                            | N                                            | 0                                      | N                                   |
| HP           | 0.795091972                            | N                                            | 682                                    | Y                                   |
| KIF26A       | 0.795091972                            | N                                            | 0                                      | N                                   |
| LUZP2        | 0.795091972                            | N                                            | 0                                      | N                                   |
| MUC19        | 0.795091972                            | N                                            | 0                                      | N                                   |
| NBPF15       | 0.795091972                            | N                                            | 0                                      | N                                   |
| NMNAT2       | 0.795091972                            | N                                            | 2                                      | N                                   |
| SCML4        | 0.795091972                            | N                                            | 0                                      | N                                   |
| SNORA3B      | 0.795091972                            | N                                            | 0                                      | N                                   |
| THUMPD3      | 0.795091972                            | N                                            | 0                                      | N                                   |
| TMEM171      | 0.795091972                            | N                                            | 0                                      | N                                   |
| TMEM250      | 0.795091972                            | N                                            | 0                                      | N                                   |
| USP37        | 0.795091972                            | N                                            | 0                                      | N                                   |
| ZNF66        | 0.795091972                            | N                                            | 0                                      | N                                   |
| NPM1P46      | 0.795099531                            | N                                            | 0                                      | N                                   |
| TM7SF2       | 0.795216675                            | N                                            | 0                                      | N                                   |
| IQCH         | 0.795303107                            | N                                            | 1                                      | N                                   |
| FKBP3        | 0.79541689                             | N                                            | 0                                      | N                                   |
| COX17        | 0.79558604                             | N                                            | 1                                      | N                                   |
| LGMN         | 0.79558604                             | N                                            | 0                                      | N                                   |
| AL355852.1   | 0.795617882                            | N                                            | 0                                      | N                                   |
| AC112191.2   | 0.795659227                            | N                                            | 0                                      | N                                   |
| DSP          | 0.795659227                            | N                                            | 41                                     | N                                   |
| DCBLD2       | 0.795826995                            | N                                            | 1                                      | N                                   |
| AC132825.3   | 0.796134811                            | N                                            | 0                                      | N                                   |
| AL049779.1   | 0.796179646                            | N                                            | 0                                      | N                                   |
| AC068254.2   | 0.796211798                            | N                                            | 0                                      | N                                   |
| AC080100.1   | 0.796211798                            | N                                            | 0                                      | N                                   |
| NBN          | 0.796211798                            | N                                            | 2                                      | N                                   |
| NSMF         | 0.796211798                            | N                                            | 0                                      | N                                   |
| PGF          | 0.796211798                            | N                                            | 195                                    | Y                                   |
| PRAM1        | 0.796211798                            | N                                            | 0                                      | N                                   |
| RNU4-2       | 0.796211798                            | N                                            | 0                                      | N                                   |
| TEN1         | 0.796211798                            | N                                            | 0                                      | N                                   |
| VAC14        | 0.796211798                            | N                                            | 4                                      | N                                   |
| AC092171.5   | 0.796441667                            | N                                            | 0                                      | N                                   |
| KCNIP2       | 0.796441667                            | N                                            | 1                                      | N                                   |
| TBL2         | 0.796441667                            | N                                            | 1                                      | N                                   |
| AC004951.2   | 0.796484638                            | N                                            | 0                                      | N                                   |
| DNAJC6       | 0.796484638                            | N                                            | 0                                      | N                                   |
| PLP2         | 0.796484638                            | N                                            | 1                                      | N                                   |
| RSRC1        | 0.796484638                            | N                                            | 1                                      | N                                   |

| Gene symbols | FDR (differential expression analysis) | Differentially expressed gene? Y, Yes; N, No | Number of insulin related publications | Insulin related gene? Y, Yes; N, No |
|--------------|----------------------------------------|----------------------------------------------|----------------------------------------|-------------------------------------|
| DLX6-AS1     | 0.796514517                            | N                                            | 0                                      | N                                   |
| EEFIG        | 0.796514517                            | N                                            | 0                                      | N                                   |
| PPAT         | 0.796514517                            | N                                            | 2                                      | N                                   |
| QSOX1        | 0.796514517                            | N                                            | 1                                      | N                                   |
| SLC35B3      | 0.796514517                            | N                                            | 1                                      | N                                   |
| AC097638.1   | 0.796515172                            | N                                            | 0                                      | N                                   |
| AL360270.1   | 0.796515172                            | N                                            | 0                                      | N                                   |
| AL449283.1   | 0.796515172                            | N                                            | 0                                      | N                                   |
| VMA21        | 0.796515172                            | N                                            | 0                                      | N                                   |
| AC114956.3   | 0.796525192                            | N                                            | 0                                      | N                                   |
| LDHAP4       | 0.796584652                            | N                                            | 0                                      | N                                   |
| MITF         | 0.796584652                            | N                                            | 19                                     | N                                   |
| FBXL8        | 0.796614326                            | N                                            | 0                                      | N                                   |
| RBM26        | 0.796614326                            | N                                            | 0                                      | N                                   |
| IQSEC3       | 0.796669401                            | N                                            | 0                                      | N                                   |
| ZNF658       | 0.796718213                            | N                                            | 0                                      | N                                   |
| MINOS1       | 0.796961402                            | N                                            | 0                                      | N                                   |
| SMIM2-AS1    | 0.797029079                            | N                                            | 0                                      | N                                   |
| TTL11        | 0.797029079                            | N                                            | 0                                      | N                                   |
| AC010913.1   | 0.79709211                             | N                                            | 0                                      | N                                   |
| ACP5         | 0.79709211                             | N                                            | 12                                     | N                                   |
| AC004951.4   | 0.797145934                            | N                                            | 0                                      | N                                   |
| AC016716.1   | 0.797145934                            | N                                            | 0                                      | N                                   |
| AL137783.1   | 0.797145934                            | N                                            | 0                                      | N                                   |
| KIF3A        | 0.797145934                            | N                                            | 5                                      | N                                   |
| SNCG         | 0.797145934                            | N                                            | 5                                      | N                                   |
| TOR2A        | 0.797145934                            | N                                            | 5                                      | N                                   |
| FAM215B      | 0.797478526                            | N                                            | 0                                      | N                                   |
| AC010319.1   | 0.797506015                            | N                                            | 0                                      | N                                   |
| AC092120.1   | 0.797506015                            | N                                            | 0                                      | N                                   |
| AC103988.1   | 0.797506015                            | N                                            | 0                                      | N                                   |
| AL589842.1   | 0.797506015                            | N                                            | 0                                      | N                                   |
| ATP6V1C1     | 0.797506015                            | N                                            | 0                                      | N                                   |
| CCDC50       | 0.797506015                            | N                                            | 0                                      | N                                   |
| DPY19L1      | 0.797506015                            | N                                            | 0                                      | N                                   |
| FLJ21408     | 0.797506015                            | N                                            | 0                                      | N                                   |
| GLTPP1       | 0.797506015                            | N                                            | 0                                      | N                                   |
| NOVA2        | 0.797506015                            | N                                            | 1                                      | N                                   |
| SLC10A2      | 0.797506015                            | N                                            | 3                                      | N                                   |
| SLC22A18     | 0.797506015                            | N                                            | 2                                      | N                                   |
| STAMBPL1     | 0.797506015                            | N                                            | 0                                      | N                                   |
| THAP9-AS1    | 0.797506015                            | N                                            | 0                                      | N                                   |
| AC067852.6   | 0.797507459                            | N                                            | 0                                      | N                                   |
| TAS1R1       | 0.797550079                            | N                                            | 4                                      | N                                   |
| ASB13        | 0.797633311                            | N                                            | 0                                      | N                                   |
| ELP1         | 0.797633311                            | N                                            | 2                                      | N                                   |
| NOA1         | 0.797633311                            | N                                            | 0                                      | N                                   |
| LINC00304    | 0.797696412                            | N                                            | 0                                      | N                                   |
| AC008105.3   | 0.797780885                            | N                                            | 0                                      | N                                   |
| AC015689.1   | 0.797780885                            | N                                            | 0                                      | N                                   |
| AL589666.2   | 0.797780885                            | N                                            | 0                                      | N                                   |
| C1QTNF6      | 0.797780885                            | N                                            | 4                                      | N                                   |
| RPS23P1      | 0.797780885                            | N                                            | 0                                      | N                                   |
| APPL2        | 0.797852114                            | N                                            | 13                                     | N                                   |
| FAM124B      | 0.797852114                            | N                                            | 0                                      | N                                   |
| PGAM1P8      | 0.797852114                            | N                                            | 0                                      | N                                   |
| ACAT1        | 0.797928204                            | N                                            | 9                                      | N                                   |
| ABLIM1       | 0.797962655                            | N                                            | 1                                      | N                                   |
| PFKFB3       | 0.797962655                            | N                                            | 29                                     | N                                   |
| COX4I1       | 0.797967525                            | N                                            | 6                                      | N                                   |
| LINC01012    | 0.797967525                            | N                                            | 0                                      | N                                   |
| SH3BGRL3     | 0.797967525                            | N                                            | 0                                      | N                                   |
| AC012510.1   | 0.798144172                            | N                                            | 0                                      | N                                   |
| AC016397.1   | 0.798169386                            | N                                            | 0                                      | N                                   |
| AC114490.2   | 0.798352015                            | N                                            | 0                                      | N                                   |
| ATP5L2       | 0.798352015                            | N                                            | 0                                      | N                                   |

| Gene symbols  | FDR (differential expression analysis) | Differentially expressed gene? Y, Yes; N, No | Number of insulin related publications | Insulin related gene? Y, Yes; N, No |
|---------------|----------------------------------------|----------------------------------------------|----------------------------------------|-------------------------------------|
| AL021453.1    | 0.79871255                             | N                                            | 0                                      | N                                   |
| AQP4-AS1      | 0.79871255                             | N                                            | 0                                      | N                                   |
| JKAMP         | 0.79871255                             | N                                            | 0                                      | N                                   |
| WNT5B         | 0.79871255                             | N                                            | 10                                     | N                                   |
| STATH         | 0.79874381                             | N                                            | 0                                      | N                                   |
| ADAMTS1       | 0.798749573                            | N                                            | 10                                     | N                                   |
| PRR16         | 0.798749573                            | N                                            | 0                                      | N                                   |
| SERTAD4       | 0.798749573                            | N                                            | 0                                      | N                                   |
| AC022034.2    | 0.798818084                            | N                                            | 0                                      | N                                   |
| ABHD14B       | 0.798900986                            | N                                            | 0                                      | N                                   |
| AP003086.1    | 0.798900986                            | N                                            | 0                                      | N                                   |
| CLDN12        | 0.798900986                            | N                                            | 0                                      | N                                   |
| HAUS2         | 0.798900986                            | N                                            | 0                                      | N                                   |
| RIMS1         | 0.798900986                            | N                                            | 4                                      | N                                   |
| TM6SF2        | 0.798900986                            | N                                            | 37                                     | N                                   |
| TRAPPC3       | 0.799235119                            | N                                            | 0                                      | N                                   |
| AL627230.4    | 0.799296839                            | N                                            | 0                                      | N                                   |
| LINC01990     | 0.799296839                            | N                                            | 0                                      | N                                   |
| SF3A2         | 0.799296839                            | N                                            | 0                                      | N                                   |
| CELF6         | 0.799440935                            | N                                            | 1                                      | N                                   |
| ACE           | 0.799515616                            | N                                            | 1000                                   | Y                                   |
| DOLK          | 0.799580818                            | N                                            | 4                                      | N                                   |
| AL355336.1    | 0.799719865                            | N                                            | 0                                      | N                                   |
| CCDC191       | 0.799744229                            | N                                            | 0                                      | N                                   |
| COX6C         | 0.799744229                            | N                                            | 1                                      | N                                   |
| FAM185A       | 0.799744229                            | N                                            | 0                                      | N                                   |
| ENTPD3        | 0.799923826                            | N                                            | 1                                      | N                                   |
| AC105053.1    | 0.800028866                            | N                                            | 0                                      | N                                   |
| AC002558.3    | 0.800134191                            | N                                            | 0                                      | N                                   |
| AC004817.4    | 0.800134191                            | N                                            | 0                                      | N                                   |
| ETV7          | 0.800134191                            | N                                            | 0                                      | N                                   |
| FCMR          | 0.800134191                            | N                                            | 1                                      | N                                   |
| PORCN         | 0.800134191                            | N                                            | 0                                      | N                                   |
| AC009517.1    | 0.800138412                            | N                                            | 0                                      | N                                   |
| PRIM2         | 0.800198374                            | N                                            | 0                                      | N                                   |
| GLIPR2        | 0.800236307                            | N                                            | 0                                      | N                                   |
| ITGA8         | 0.800236307                            | N                                            | 0                                      | N                                   |
| NPR2          | 0.800236307                            | N                                            | 6                                      | N                                   |
| SDF2          | 0.800290933                            | N                                            | 0                                      | N                                   |
| GPT           | 0.800452245                            | N                                            | 80                                     | N                                   |
| LINC01125     | 0.80050255                             | N                                            | 0                                      | N                                   |
| SMARCD3       | 0.80050255                             | N                                            | 6                                      | N                                   |
| AC025881.1    | 0.800679201                            | N                                            | 0                                      | N                                   |
| AC027097.2    | 0.800783184                            | N                                            | 0                                      | N                                   |
| C16orf86      | 0.800783184                            | N                                            | 0                                      | N                                   |
| NUP210        | 0.800783184                            | N                                            | 1                                      | N                                   |
| UBE2NL        | 0.800783184                            | N                                            | 0                                      | N                                   |
| AC126177.7    | 0.800841882                            | N                                            | 0                                      | N                                   |
| AC133644.1    | 0.800841882                            | N                                            | 0                                      | N                                   |
| AL122018.1    | 0.800841882                            | N                                            | 0                                      | N                                   |
| COQ10BP2      | 0.800841882                            | N                                            | 0                                      | N                                   |
| GNB4          | 0.800841882                            | N                                            | 1                                      | N                                   |
| JMJD7-PLA2G4B | 0.800841882                            | N                                            | 0                                      | N                                   |
| MTND2P2       | 0.800841882                            | N                                            | 0                                      | N                                   |
| POU2F3        | 0.800841882                            | N                                            | 3                                      | N                                   |
| SCAMP3        | 0.800841882                            | N                                            | 3                                      | N                                   |
| SLC45A2       | 0.800841882                            | N                                            | 0                                      | N                                   |
| FXYD5         | 0.800858495                            | N                                            | 0                                      | N                                   |
| INTS7         | 0.800858495                            | N                                            | 0                                      | N                                   |
| AC005726.3    | 0.800879751                            | N                                            | 0                                      | N                                   |
| AC010491.1    | 0.800879751                            | N                                            | 0                                      | N                                   |
| AC096677.2    | 0.800879751                            | N                                            | 0                                      | N                                   |
| ACTN4         | 0.800879751                            | N                                            | 4                                      | N                                   |
| ADARB2        | 0.800879751                            | N                                            | 2                                      | N                                   |
| GALR1         | 0.800879751                            | N                                            | 13                                     | N                                   |
| IARS2P1       | 0.800879751                            | N                                            | 0                                      | N                                   |

| Gene symbols | FDR (differential expression analysis) | Differentially expressed gene? Y, Yes; N, No | Number of insulin related publications | Insulin related gene? Y, Yes; N, No |
|--------------|----------------------------------------|----------------------------------------------|----------------------------------------|-------------------------------------|
| ICE2P2       | 0.800879751                            | N                                            | 0                                      | N                                   |
| SLC39A7      | 0.800879751                            | N                                            | 4                                      | N                                   |
| TRERF1       | 0.800879751                            | N                                            | 0                                      | N                                   |
| RDH13        | 0.80096052                             | N                                            | 0                                      | N                                   |
| TPRN         | 0.800979075                            | N                                            | 0                                      | N                                   |
| GAPDHP1      | 0.80104828                             | N                                            | 0                                      | N                                   |
| LDHAP5       | 0.80104828                             | N                                            | 0                                      | N                                   |
| RPS7P10      | 0.80104828                             | N                                            | 0                                      | N                                   |
| GPDIL        | 0.801060466                            | N                                            | 2                                      | N                                   |
| PTRH2        | 0.801096774                            | N                                            | 0                                      | N                                   |
| AC011944.2   | 0.801155743                            | N                                            | 0                                      | N                                   |
| AC084083.1   | 0.801183218                            | N                                            | 0                                      | N                                   |
| ACACA        | 0.801183218                            | N                                            | 64                                     | N                                   |
| ADRA1A       | 0.801183218                            | N                                            | 7                                      | N                                   |
| PTOV1        | 0.801183218                            | N                                            | 0                                      | N                                   |
| AL031281.2   | 0.801271162                            | N                                            | 0                                      | N                                   |
| NBPF3        | 0.801271162                            | N                                            | 0                                      | N                                   |
| OBSL1        | 0.801271162                            | N                                            | 6                                      | N                                   |
| SH2D3A       | 0.801271162                            | N                                            | 1                                      | N                                   |
| SPEF2        | 0.801271162                            | N                                            | 0                                      | N                                   |
| ZNF468       | 0.801271162                            | N                                            | 0                                      | N                                   |
| NHLH2        | 0.801365281                            | N                                            | 2                                      | N                                   |
| TIMP1        | 0.801365281                            | N                                            | 63                                     | N                                   |
| ATP6V0E2     | 0.801371694                            | N                                            | 0                                      | N                                   |
| CROCC2       | 0.801371694                            | N                                            | 0                                      | N                                   |
| LYPD5        | 0.801371694                            | N                                            | 0                                      | N                                   |
| PSMB1        | 0.801371694                            | N                                            | 1                                      | N                                   |
| SCARF1       | 0.801371694                            | N                                            | 0                                      | N                                   |
| AC010182.1   | 0.801651758                            | N                                            | 0                                      | N                                   |
| AC024451.3   | 0.801767514                            | N                                            | 0                                      | N                                   |
| AC233702.10  | 0.801767514                            | N                                            | 0                                      | N                                   |
| ARL16        | 0.801767514                            | N                                            | 0                                      | N                                   |
| C12orf54     | 0.801767514                            | N                                            | 0                                      | N                                   |
| LINC00265    | 0.801767514                            | N                                            | 0                                      | N                                   |
| SOWAHB       | 0.801767514                            | N                                            | 0                                      | N                                   |
| TMEM68       | 0.801767514                            | N                                            | 0                                      | N                                   |
| CLU          | 0.801844116                            | N                                            | 36                                     | N                                   |
| NSUN3        | 0.801844116                            | N                                            | 0                                      | N                                   |
| ZNF436-AS1   | 0.801844116                            | N                                            | 0                                      | N                                   |
| COX6B1       | 0.801924723                            | N                                            | 1                                      | N                                   |
| LRRC73       | 0.801924723                            | N                                            | 0                                      | N                                   |
| HEATR3       | 0.802045818                            | N                                            | 0                                      | N                                   |
| ANXA4        | 0.80210025                             | N                                            | 1                                      | N                                   |
| AP005060.1   | 0.80210025                             | N                                            | 0                                      | N                                   |
| CRYZL1       | 0.80210025                             | N                                            | 0                                      | N                                   |
| HENMT1       | 0.80210025                             | N                                            | 0                                      | N                                   |
| SSU72        | 0.80210025                             | N                                            | 0                                      | N                                   |
| STK35        | 0.80210025                             | N                                            | 0                                      | N                                   |
| PDHX         | 0.802296017                            | N                                            | 2                                      | N                                   |
| BRIX1        | 0.802303567                            | N                                            | 0                                      | N                                   |
| AC134407.2   | 0.802403111                            | N                                            | 0                                      | N                                   |
| CHUK         | 0.802403111                            | N                                            | 30                                     | N                                   |
| MIP          | 0.802403111                            | N                                            | 224                                    | Y                                   |
| SNORA14A     | 0.802414971                            | N                                            | 0                                      | N                                   |
| TAGLN3       | 0.802414971                            | N                                            | 0                                      | N                                   |
| TRIM60P18    | 0.802414971                            | N                                            | 0                                      | N                                   |
| AL133520.1   | 0.802634283                            | N                                            | 0                                      | N                                   |
| KAZN         | 0.802634283                            | N                                            | 0                                      | N                                   |
| LINC00710    | 0.802634845                            | N                                            | 0                                      | N                                   |
| IZUMO2       | 0.802714185                            | N                                            | 0                                      | N                                   |
| KIF26B       | 0.802714185                            | N                                            | 1                                      | N                                   |
| PTENP1       | 0.802714185                            | N                                            | 1                                      | N                                   |
| STAM         | 0.802714185                            | N                                            | 32                                     | N                                   |
| ZMYM6        | 0.802714185                            | N                                            | 0                                      | N                                   |
| AC124016.2   | 0.803089582                            | N                                            | 0                                      | N                                   |
| SOWAHD       | 0.803192482                            | N                                            | 0                                      | N                                   |

| Gene symbols | FDR (differential expression analysis) | Differentially expressed gene? Y, Yes; N, No | Number of insulin related publications | Insulin related gene? Y, Yes; N, No |
|--------------|----------------------------------------|----------------------------------------------|----------------------------------------|-------------------------------------|
| AL359075.1   | 0.803255569                            | N                                            | 0                                      | N                                   |
| CEACAM8      | 0.803523465                            | N                                            | 1                                      | N                                   |
| AC010435.1   | 0.803525318                            | N                                            | 0                                      | N                                   |
| HSD17B7      | 0.803570138                            | N                                            | 2                                      | N                                   |
| MARVELD3     | 0.803603919                            | N                                            | 0                                      | N                                   |
| AC104389.3   | 0.803620872                            | N                                            | 0                                      | N                                   |
| ARPC2        | 0.803622938                            | N                                            | 0                                      | N                                   |
| CCDC40       | 0.803622938                            | N                                            | 0                                      | N                                   |
| CBWD2        | 0.803684518                            | N                                            | 0                                      | N                                   |
| KLHL15       | 0.80368542                             | N                                            | 0                                      | N                                   |
| KLHL2        | 0.80368542                             | N                                            | 0                                      | N                                   |
| GHRLOS       | 0.803759767                            | N                                            | 1                                      | N                                   |
| MTERF1       | 0.803759767                            | N                                            | 0                                      | N                                   |
| PDZD11       | 0.803759767                            | N                                            | 0                                      | N                                   |
| SLC8A1       | 0.803759767                            | N                                            | 1                                      | N                                   |
| Z99129.3     | 0.803923203                            | N                                            | 0                                      | N                                   |
| AC016542.3   | 0.803924452                            | N                                            | 0                                      | N                                   |
| AJUBA        | 0.803924452                            | N                                            | 1                                      | N                                   |
| CPSF7        | 0.803924452                            | N                                            | 0                                      | N                                   |
| NPB          | 0.803924452                            | N                                            | 9                                      | N                                   |
| OLA1P3       | 0.803924452                            | N                                            | 0                                      | N                                   |
| RIPOR2       | 0.803924452                            | N                                            | 0                                      | N                                   |
| SIX5         | 0.803924452                            | N                                            | 2                                      | N                                   |
| PCNP         | 0.804041243                            | N                                            | 1                                      | N                                   |
| AC113403.1   | 0.804384528                            | N                                            | 0                                      | N                                   |
| AL024508.2   | 0.804384528                            | N                                            | 0                                      | N                                   |
| AL078590.2   | 0.804384528                            | N                                            | 0                                      | N                                   |
| AL353708.1   | 0.804384528                            | N                                            | 0                                      | N                                   |
| C10orf88     | 0.804384528                            | N                                            | 0                                      | N                                   |
| CATSPER2P1   | 0.804384528                            | N                                            | 0                                      | N                                   |
| CUL1P1       | 0.804384528                            | N                                            | 0                                      | N                                   |
| GPAM         | 0.804384528                            | N                                            | 13                                     | N                                   |
| PTK2         | 0.804384528                            | N                                            | 176                                    | Y                                   |
| RN7SL357P    | 0.804384528                            | N                                            | 0                                      | N                                   |
| ST8SIA1      | 0.804384528                            | N                                            | 2                                      | N                                   |
| TUBB2A       | 0.804384528                            | N                                            | 2                                      | N                                   |
| ADD3-AS1     | 0.804389274                            | N                                            | 0                                      | N                                   |
| NRIP3        | 0.804389274                            | N                                            | 0                                      | N                                   |
| ST20-AS1     | 0.804401727                            | N                                            | 0                                      | N                                   |
| CSF2         | 0.804557126                            | N                                            | 8                                      | N                                   |
| ARPP19       | 0.804646014                            | N                                            | 0                                      | N                                   |
| HSPG2        | 0.804646014                            | N                                            | 6                                      | N                                   |
| MYSM1        | 0.804646014                            | N                                            | 0                                      | N                                   |
| AL034417.2   | 0.804669847                            | N                                            | 0                                      | N                                   |
| GFPT2        | 0.804669847                            | N                                            | 5                                      | N                                   |
| PTPRJ        | 0.804673548                            | N                                            | 4                                      | N                                   |
| AC007496.3   | 0.804945624                            | N                                            | 0                                      | N                                   |
| APOPT1       | 0.804945624                            | N                                            | 1                                      | N                                   |
| CYFIP2       | 0.804945624                            | N                                            | 2                                      | N                                   |
| DXO          | 0.804945624                            | N                                            | 2                                      | N                                   |
| PLPP1        | 0.804945624                            | N                                            | 0                                      | N                                   |
| SELPLG       | 0.804945624                            | N                                            | 1                                      | N                                   |
| SSSCA1       | 0.804945624                            | N                                            | 0                                      | N                                   |
| AC003102.1   | 0.805002964                            | N                                            | 0                                      | N                                   |
| AC007546.1   | 0.805002964                            | N                                            | 0                                      | N                                   |
| AC008264.2   | 0.805002964                            | N                                            | 0                                      | N                                   |
| AC008620.2   | 0.805002964                            | N                                            | 0                                      | N                                   |
| ANKRD36BP2   | 0.805002964                            | N                                            | 0                                      | N                                   |
| ANXA2R       | 0.805002964                            | N                                            | 0                                      | N                                   |
| LINC00702    | 0.805002964                            | N                                            | 0                                      | N                                   |
| AC021097.1   | 0.805013097                            | N                                            | 0                                      | N                                   |
| AP000648.3   | 0.805013097                            | N                                            | 0                                      | N                                   |
| ARHGAP1      | 0.805013097                            | N                                            | 0                                      | N                                   |
| CA5A         | 0.805013097                            | N                                            | 0                                      | N                                   |
| CGREF1       | 0.805013097                            | N                                            | 0                                      | N                                   |
| HOGA1        | 0.805013097                            | N                                            | 0                                      | N                                   |

| Gene symbols | FDR (differential expression analysis) | Differentially expressed gene? Y, Yes; N, No | Number of insulin related publications | Insulin related gene? Y, Yes; N, No |
|--------------|----------------------------------------|----------------------------------------------|----------------------------------------|-------------------------------------|
| LARP1        | 0.805013097                            | N                                            | 0                                      | N                                   |
| PIP4K2B      | 0.805013097                            | N                                            | 3                                      | N                                   |
| SNX32        | 0.805013097                            | N                                            | 0                                      | N                                   |
| TSPAN32      | 0.805013097                            | N                                            | 0                                      | N                                   |
| AGBL3        | 0.805154178                            | N                                            | 0                                      | N                                   |
| AL355512.1   | 0.805154178                            | N                                            | 0                                      | N                                   |
| AP001803.1   | 0.805154178                            | N                                            | 0                                      | N                                   |
| FAM199X      | 0.805154178                            | N                                            | 0                                      | N                                   |
| FRAS1        | 0.805154178                            | N                                            | 0                                      | N                                   |
| IRX4         | 0.805154178                            | N                                            | 0                                      | N                                   |
| P4HA3        | 0.805154178                            | N                                            | 0                                      | N                                   |
| WDR13        | 0.805154178                            | N                                            | 3                                      | N                                   |
| ZFHX3        | 0.805154178                            | N                                            | 0                                      | N                                   |
| ZNF480       | 0.805154178                            | N                                            | 0                                      | N                                   |
| SCNN1D       | 0.805169304                            | N                                            | 0                                      | N                                   |
| TRABD        | 0.805169304                            | N                                            | 0                                      | N                                   |
| PLCE1-AS1    | 0.805177353                            | N                                            | 0                                      | N                                   |
| SNX6P1       | 0.805177353                            | N                                            | 0                                      | N                                   |
| AC037479.1   | 0.805206264                            | N                                            | 0                                      | N                                   |
| AP002364.1   | 0.805206264                            | N                                            | 0                                      | N                                   |
| COX19        | 0.805206264                            | N                                            | 0                                      | N                                   |
| GALNS        | 0.805206264                            | N                                            | 0                                      | N                                   |
| LANCL1       | 0.805206264                            | N                                            | 2                                      | N                                   |
| OTUB1        | 0.805206264                            | N                                            | 0                                      | N                                   |
| POLDIP2      | 0.805206264                            | N                                            | 2                                      | N                                   |
| PRND         | 0.805206264                            | N                                            | 0                                      | N                                   |
| RNF145       | 0.805206264                            | N                                            | 2                                      | N                                   |
| SNF8         | 0.805206264                            | N                                            | 0                                      | N                                   |
| AC093878.1   | 0.80527963                             | N                                            | 0                                      | N                                   |
| AC107890.1   | 0.80527963                             | N                                            | 0                                      | N                                   |
| AC125611.3   | 0.80527963                             | N                                            | 0                                      | N                                   |
| AC132872.3   | 0.80527963                             | N                                            | 0                                      | N                                   |
| AGPAT3       | 0.80527963                             | N                                            | 1                                      | N                                   |
| AL591379.1   | 0.80527963                             | N                                            | 0                                      | N                                   |
| CHRM5        | 0.80527963                             | N                                            | 0                                      | N                                   |
| DIP2A        | 0.80527963                             | N                                            | 0                                      | N                                   |
| FLJ36000     | 0.80527963                             | N                                            | 0                                      | N                                   |
| FLT1P1       | 0.80527963                             | N                                            | 0                                      | N                                   |
| ICAM2        | 0.80527963                             | N                                            | 1                                      | N                                   |
| MKNK2P1      | 0.80527963                             | N                                            | 0                                      | N                                   |
| NR2F2-AS1    | 0.80527963                             | N                                            | 0                                      | N                                   |
| P2RY11       | 0.80527963                             | N                                            | 2                                      | N                                   |
| PUS7         | 0.80527963                             | N                                            | 0                                      | N                                   |
| RHOU         | 0.80527963                             | N                                            | 1                                      | N                                   |
| RPS27AP12    | 0.80527963                             | N                                            | 0                                      | N                                   |
| RPS2P45      | 0.80527963                             | N                                            | 0                                      | N                                   |
| TRIM22       | 0.80527963                             | N                                            | 1                                      | N                                   |
| WDCP         | 0.80527963                             | N                                            | 0                                      | N                                   |
| RPL4P5       | 0.805524422                            | N                                            | 0                                      | N                                   |
| AC080013.4   | 0.805732235                            | N                                            | 0                                      | N                                   |
| AC097504.1   | 0.805732235                            | N                                            | 0                                      | N                                   |
| AC005840.4   | 0.805739128                            | N                                            | 0                                      | N                                   |
| BLOC1S4      | 0.805739128                            | N                                            | 0                                      | N                                   |
| SOX8         | 0.805739128                            | N                                            | 2                                      | N                                   |
| AMMECR1-IT1  | 0.805745725                            | N                                            | 0                                      | N                                   |
| AC107993.1   | 0.805762876                            | N                                            | 0                                      | N                                   |
| ACTN1-AS1    | 0.805762876                            | N                                            | 0                                      | N                                   |
| AL117336.2   | 0.805762876                            | N                                            | 0                                      | N                                   |
| LINC00667    | 0.805762876                            | N                                            | 0                                      | N                                   |
| TMEM41A      | 0.805762876                            | N                                            | 0                                      | N                                   |
| PARP10       | 0.805768178                            | N                                            | 1                                      | N                                   |
| FAM118B      | 0.805809457                            | N                                            | 0                                      | N                                   |
| TCEA1        | 0.805809457                            | N                                            | 0                                      | N                                   |
| S100A4       | 0.805937364                            | N                                            | 19                                     | N                                   |
| ABLIM3       | 0.806006385                            | N                                            | 0                                      | N                                   |
| AC006058.3   | 0.806006385                            | N                                            | 0                                      | N                                   |

| Gene symbols | FDR (differential expression analysis) | Differentially expressed gene? Y, Yes; N, No | Number of insulin related publications | Insulin related gene? Y, Yes; N, No |
|--------------|----------------------------------------|----------------------------------------------|----------------------------------------|-------------------------------------|
| AC068039.4   | 0.806006385                            | N                                            | 0                                      | N                                   |
| B3GNTL1      | 0.806006385                            | N                                            | 0                                      | N                                   |
| MON1A        | 0.806006385                            | N                                            | 1                                      | N                                   |
| IDH2         | 0.806022508                            | N                                            | 5                                      | N                                   |
| LSR          | 0.806022508                            | N                                            | 11                                     | N                                   |
| RASSF6       | 0.806022508                            | N                                            | 0                                      | N                                   |
| ZNF595       | 0.806371851                            | N                                            | 0                                      | N                                   |
| AC012645.1   | 0.806390382                            | N                                            | 0                                      | N                                   |
| ANP32B       | 0.806390382                            | N                                            | 0                                      | N                                   |
| CD163L1      | 0.806390382                            | N                                            | 0                                      | N                                   |
| DDX10P1      | 0.806390382                            | N                                            | 0                                      | N                                   |
| EIF2B3       | 0.806390382                            | N                                            | 0                                      | N                                   |
| FAM129B      | 0.806390382                            | N                                            | 0                                      | N                                   |
| PPP1R26P1    | 0.806390382                            | N                                            | 0                                      | N                                   |
| QRSL1        | 0.806390382                            | N                                            | 0                                      | N                                   |
| VCAN         | 0.806390382                            | N                                            | 19                                     | N                                   |
| AC010326.3   | 0.806458015                            | N                                            | 0                                      | N                                   |
| BRPF3        | 0.806458015                            | N                                            | 0                                      | N                                   |
| CCDC159      | 0.806458015                            | N                                            | 0                                      | N                                   |
| NIPSNAP3A    | 0.806458015                            | N                                            | 0                                      | N                                   |
| SCHIP1       | 0.806458015                            | N                                            | 0                                      | N                                   |
| ZNF92        | 0.806458015                            | N                                            | 0                                      | N                                   |
| AC002401.4   | 0.806513979                            | N                                            | 0                                      | N                                   |
| AC018628.1   | 0.806513979                            | N                                            | 0                                      | N                                   |
| CD209        | 0.806513979                            | N                                            | 5                                      | N                                   |
| DLL1         | 0.806513979                            | N                                            | 9                                      | N                                   |
| FER1L5       | 0.806513979                            | N                                            | 1                                      | N                                   |
| RHD          | 0.806513979                            | N                                            | 4                                      | N                                   |
| XPNPEP1      | 0.806513979                            | N                                            | 0                                      | N                                   |
| CAMK1D       | 0.806524968                            | N                                            | 11                                     | N                                   |
| PSMC1        | 0.806553268                            | N                                            | 0                                      | N                                   |
| RP11-394O4.5 | 0.806567171                            | N                                            | 0                                      | N                                   |
| AC004241.1   | 0.806574959                            | N                                            | 0                                      | N                                   |
| AC051619.8   | 0.806574959                            | N                                            | 0                                      | N                                   |
| AC099535.1   | 0.806574959                            | N                                            | 0                                      | N                                   |
| AL513327.1   | 0.806574959                            | N                                            | 0                                      | N                                   |
| AMD1         | 0.806574959                            | N                                            | 0                                      | N                                   |
| C19orf24     | 0.806574959                            | N                                            | 0                                      | N                                   |
| CAMTA2       | 0.806574959                            | N                                            | 1                                      | N                                   |
| CLEC2D       | 0.806574959                            | N                                            | 0                                      | N                                   |
| ELF2P3       | 0.806574959                            | N                                            | 0                                      | N                                   |
| ETHE1        | 0.806574959                            | N                                            | 0                                      | N                                   |
| HLA-C        | 0.806574959                            | N                                            | 38                                     | N                                   |
| MED23        | 0.806574959                            | N                                            | 3                                      | N                                   |
| METTLL16     | 0.806574959                            | N                                            | 0                                      | N                                   |
| MTFR1        | 0.806574959                            | N                                            | 1                                      | N                                   |
| PAICSP3      | 0.806574959                            | N                                            | 0                                      | N                                   |
| PIK3R2       | 0.806574959                            | N                                            | 20                                     | N                                   |
| NKRF         | 0.806847379                            | N                                            | 0                                      | N                                   |
| PPA2         | 0.806847379                            | N                                            | 2                                      | N                                   |
| AC017104.1   | 0.806944744                            | N                                            | 0                                      | N                                   |
| AC020779.1   | 0.806944744                            | N                                            | 0                                      | N                                   |
| AC073150.1   | 0.806944744                            | N                                            | 0                                      | N                                   |
| ASIC1        | 0.806944744                            | N                                            | 4                                      | N                                   |
| CCDC51       | 0.806944744                            | N                                            | 0                                      | N                                   |
| GEMIN4       | 0.806944744                            | N                                            | 0                                      | N                                   |
| Metazoa_SRP  | 0.806944744                            | N                                            | 0                                      | N                                   |
| SRP68        | 0.806944744                            | N                                            | 0                                      | N                                   |
| TMEM131      | 0.806944744                            | N                                            | 0                                      | N                                   |
| UTY          | 0.806944744                            | N                                            | 1                                      | N                                   |
| AC108125.1   | 0.806986678                            | N                                            | 0                                      | N                                   |
| AL162578.1   | 0.806986678                            | N                                            | 0                                      | N                                   |
| C2orf83      | 0.806986678                            | N                                            | 1                                      | N                                   |
| MTCO3P11     | 0.806986678                            | N                                            | 0                                      | N                                   |
| ZNHIT1P1     | 0.806986678                            | N                                            | 0                                      | N                                   |
| GPR89P       | 0.807025527                            | N                                            | 0                                      | N                                   |



| Gene symbols | FDR (differential expression analysis) | Differentially expressed gene? Y, Yes; N, No | Number of insulin related publications | Insulin related gene? Y, Yes; N, No |
|--------------|----------------------------------------|----------------------------------------------|----------------------------------------|-------------------------------------|
| LINC00173    | 0.807025527                            | N                                            | 0                                      | N                                   |
| MLLT1        | 0.807025527                            | N                                            | 0                                      | N                                   |
| PGM2L1       | 0.807025527                            | N                                            | 0                                      | N                                   |
| POLR2CP1     | 0.807025527                            | N                                            | 0                                      | N                                   |
| PTPRS        | 0.807025527                            | N                                            | 5                                      | N                                   |
| RNF115       | 0.807025527                            | N                                            | 0                                      | N                                   |
| RNF181       | 0.807025527                            | N                                            | 0                                      | N                                   |
| AL110504.1   | 0.807028845                            | N                                            | 0                                      | N                                   |
| C5orf51      | 0.807028845                            | N                                            | 0                                      | N                                   |
| IPO7P1       | 0.807028845                            | N                                            | 0                                      | N                                   |
| OGDHL        | 0.807028845                            | N                                            | 0                                      | N                                   |
| Z98752.2     | 0.807232557                            | N                                            | 0                                      | N                                   |
| PATL1        | 0.807419271                            | N                                            | 0                                      | N                                   |
| AC008739.5   | 0.807439585                            | N                                            | 0                                      | N                                   |
| FMC1         | 0.807439585                            | N                                            | 1                                      | N                                   |
| LYPD6        | 0.807439585                            | N                                            | 0                                      | N                                   |
| RBM5-AS1     | 0.807439585                            | N                                            | 0                                      | N                                   |
| TBC1D22A     | 0.807439585                            | N                                            | 0                                      | N                                   |
| AP001469.3   | 0.807566893                            | N                                            | 0                                      | N                                   |
| NPTXR        | 0.807716743                            | N                                            | 0                                      | N                                   |
| FOXRED2      | 0.807863091                            | N                                            | 0                                      | N                                   |
| PEX3         | 0.807863091                            | N                                            | 0                                      | N                                   |
| TKT          | 0.807863091                            | N                                            | 7                                      | N                                   |
| DCAF4        | 0.807932293                            | N                                            | 0                                      | N                                   |
| CAV3         | 0.807995832                            | N                                            | 37                                     | N                                   |
| LRRN3        | 0.808056023                            | N                                            | 0                                      | N                                   |
| Z98882.1     | 0.808305383                            | N                                            | 0                                      | N                                   |
| ALX3         | 0.808315055                            | N                                            | 5                                      | N                                   |
| GOLT1B       | 0.808315055                            | N                                            | 0                                      | N                                   |
| MIR9-3HG     | 0.808315055                            | N                                            | 0                                      | N                                   |
| MSMO1        | 0.808315055                            | N                                            | 0                                      | N                                   |
| UXS1         | 0.808315055                            | N                                            | 0                                      | N                                   |
| AC105760.1   | 0.808376569                            | N                                            | 0                                      | N                                   |
| AL021878.2   | 0.808376569                            | N                                            | 0                                      | N                                   |
| CACTIN-AS1   | 0.808376569                            | N                                            | 0                                      | N                                   |
| CCL22        | 0.808376569                            | N                                            | 10                                     | N                                   |
| GPR4         | 0.808376569                            | N                                            | 3                                      | N                                   |
| HDAC8        | 0.808376569                            | N                                            | 3                                      | N                                   |
| INSIG1       | 0.808376569                            | N                                            | 120                                    | Y                                   |
| RPUSD1       | 0.808376569                            | N                                            | 0                                      | N                                   |
| ZNF761       | 0.808376569                            | N                                            | 0                                      | N                                   |
| AC025048.2   | 0.80872592                             | N                                            | 0                                      | N                                   |
| WDR33        | 0.80872592                             | N                                            | 0                                      | N                                   |
| C2orf71      | 0.808835921                            | N                                            | 0                                      | N                                   |
| MCF2         | 0.808835921                            | N                                            | 2                                      | N                                   |
| RTN4RL2      | 0.808835921                            | N                                            | 0                                      | N                                   |
| SELENOO      | 0.808835921                            | N                                            | 0                                      | N                                   |
| CDHR3        | 0.808929119                            | N                                            | 0                                      | N                                   |
| FLAD1        | 0.808929119                            | N                                            | 0                                      | N                                   |
| FIP1L1       | 0.808991637                            | N                                            | 1                                      | N                                   |
| AC020559.1   | 0.809056228                            | N                                            | 0                                      | N                                   |
| AC125232.1   | 0.809056228                            | N                                            | 0                                      | N                                   |
| DHX35        | 0.809056228                            | N                                            | 0                                      | N                                   |
| EEF1DP3      | 0.809056228                            | N                                            | 0                                      | N                                   |
| HAGH         | 0.809056228                            | N                                            | 2                                      | N                                   |
| HELZ2        | 0.809056228                            | N                                            | 1                                      | N                                   |
| IER3IP1      | 0.809056228                            | N                                            | 2                                      | N                                   |
| MAP3K11      | 0.809056228                            | N                                            | 1                                      | N                                   |
| MAST2        | 0.809056228                            | N                                            | 2                                      | N                                   |
| MOGAT3       | 0.809056228                            | N                                            | 2                                      | N                                   |
| AL121992.1   | 0.809233844                            | N                                            | 0                                      | N                                   |
| DTNBP1       | 0.809233844                            | N                                            | 0                                      | N                                   |
| GABRB3       | 0.809233844                            | N                                            | 2                                      | N                                   |
| LINC01998    | 0.809233844                            | N                                            | 0                                      | N                                   |
| RPL21P32     | 0.809233844                            | N                                            | 0                                      | N                                   |
| TNS2         | 0.809233844                            | N                                            | 5                                      | N                                   |

| Gene symbols  | FDR (differential expression analysis) | Differentially expressed gene? Y, Yes; N, No | Number of insulin related publications | Insulin related gene? Y, Yes; N, No |
|---------------|----------------------------------------|----------------------------------------------|----------------------------------------|-------------------------------------|
| AZU1          | 0.809386383                            | N                                            | 1                                      | N                                   |
| AC135048.1    | 0.809420682                            | N                                            | 0                                      | N                                   |
| RPL7P49       | 0.809420682                            | N                                            | 0                                      | N                                   |
| AC093157.1    | 0.809468445                            | N                                            | 0                                      | N                                   |
| AHSA2         | 0.809468445                            | N                                            | 1                                      | N                                   |
| AP3B2         | 0.809468445                            | N                                            | 0                                      | N                                   |
| ATXN7L1       | 0.809468445                            | N                                            | 1                                      | N                                   |
| CLIC5         | 0.809468445                            | N                                            | 2                                      | N                                   |
| CSTB          | 0.809468445                            | N                                            | 4                                      | N                                   |
| DBN1          | 0.809468445                            | N                                            | 0                                      | N                                   |
| FAM83G        | 0.809468445                            | N                                            | 0                                      | N                                   |
| GRPEL2        | 0.809468445                            | N                                            | 0                                      | N                                   |
| IQANK1        | 0.809468445                            | N                                            | 0                                      | N                                   |
| NAA15         | 0.809468445                            | N                                            | 0                                      | N                                   |
| PARP12        | 0.809468445                            | N                                            | 0                                      | N                                   |
| TNFSF10       | 0.809468445                            | N                                            | 33                                     | N                                   |
| AL590326.2    | 0.809493397                            | N                                            | 0                                      | N                                   |
| CERS2         | 0.809493397                            | N                                            | 11                                     | N                                   |
| PHKG2         | 0.809493397                            | N                                            | 1                                      | N                                   |
| TMEM9B-AS1    | 0.809493397                            | N                                            | 0                                      | N                                   |
| ZNF442        | 0.809493397                            | N                                            | 0                                      | N                                   |
| AC022211.4    | 0.809605022                            | N                                            | 0                                      | N                                   |
| B4GALT6       | 0.809605022                            | N                                            | 1                                      | N                                   |
| MUC17         | 0.809669354                            | N                                            | 0                                      | N                                   |
| AC083806.2    | 0.809670827                            | N                                            | 0                                      | N                                   |
| AP2M1         | 0.809670827                            | N                                            | 2                                      | N                                   |
| CDC25A        | 0.809670827                            | N                                            | 8                                      | N                                   |
| FLJ37035      | 0.809670827                            | N                                            | 0                                      | N                                   |
| GAPDHP40      | 0.809670827                            | N                                            | 0                                      | N                                   |
| MTIL          | 0.809670827                            | N                                            | 1                                      | N                                   |
| ANKRD1        | 0.809747935                            | N                                            | 1                                      | N                                   |
| C10orf82      | 0.809747935                            | N                                            | 0                                      | N                                   |
| GSTP1P1       | 0.809747935                            | N                                            | 0                                      | N                                   |
| GTF3C2-AS1    | 0.809747935                            | N                                            | 0                                      | N                                   |
| SPCS1         | 0.809747935                            | N                                            | 0                                      | N                                   |
| TRAF1         | 0.809747935                            | N                                            | 10                                     | N                                   |
| MANEA-AS1     | 0.809926587                            | N                                            | 0                                      | N                                   |
| PALB2         | 0.809926587                            | N                                            | 0                                      | N                                   |
| PHF1          | 0.809944042                            | N                                            | 5                                      | N                                   |
| MIR663AHG     | 0.809969433                            | N                                            | 0                                      | N                                   |
| TRIM17        | 0.809969433                            | N                                            | 0                                      | N                                   |
| CD101         | 0.810010014                            | N                                            | 6                                      | N                                   |
| SSR2          | 0.810418458                            | N                                            | 1                                      | N                                   |
| ADD2          | 0.810640507                            | N                                            | 0                                      | N                                   |
| AL359643.2    | 0.810640507                            | N                                            | 0                                      | N                                   |
| AL512488.1    | 0.810640507                            | N                                            | 0                                      | N                                   |
| WAC-AS1       | 0.810677521                            | N                                            | 0                                      | N                                   |
| PTP4A1P4      | 0.810699932                            | N                                            | 0                                      | N                                   |
| ARHGEF26      | 0.81071517                             | N                                            | 1                                      | N                                   |
| TMOD4         | 0.81071517                             | N                                            | 0                                      | N                                   |
| AC007731.2    | 0.810930065                            | N                                            | 0                                      | N                                   |
| AC107954.1    | 0.810930065                            | N                                            | 0                                      | N                                   |
| NME9          | 0.810984989                            | N                                            | 0                                      | N                                   |
| CTD-2245F17.3 | 0.811083011                            | N                                            | 0                                      | N                                   |
| AL354872.1    | 0.811160151                            | N                                            | 0                                      | N                                   |
| PRKAG1        | 0.811160151                            | N                                            | 6                                      | N                                   |
| C8orf34       | 0.811283457                            | N                                            | 0                                      | N                                   |
| AC096720.2    | 0.811312289                            | N                                            | 0                                      | N                                   |
| AC239799.1    | 0.811312289                            | N                                            | 0                                      | N                                   |
| AP001094.4    | 0.811312289                            | N                                            | 0                                      | N                                   |
| CXCL8         | 0.811312289                            | N                                            | 56                                     | N                                   |
| RPSAP52       | 0.811312289                            | N                                            | 0                                      | N                                   |
| TRUB1         | 0.811312289                            | N                                            | 0                                      | N                                   |
| SEMA5B        | 0.811341698                            | N                                            | 0                                      | N                                   |
| AC026356.1    | 0.811368318                            | N                                            | 0                                      | N                                   |
| ACSM2A        | 0.811538691                            | N                                            | 0                                      | N                                   |

| Gene symbols | FDR (differential expression analysis) | Differentially expressed gene? Y, Yes; N, No | Number of insulin related publications | Insulin related gene? Y, Yes; N, No |
|--------------|----------------------------------------|----------------------------------------------|----------------------------------------|-------------------------------------|
| ANKRD30BL    | 0.811538691                            | N                                            | 0                                      | N                                   |
| AL359258.2   | 0.8115524                              | N                                            | 0                                      | N                                   |
| GNAI3        | 0.811554418                            | N                                            | 6                                      | N                                   |
| OTUD5        | 0.811578179                            | N                                            | 0                                      | N                                   |
| SLC12A4      | 0.811618041                            | N                                            | 1                                      | N                                   |
| TAF3         | 0.811618041                            | N                                            | 0                                      | N                                   |
| AC124283.4   | 0.811761645                            | N                                            | 0                                      | N                                   |
| ALG1L9P      | 0.811790556                            | N                                            | 0                                      | N                                   |
| AC100757.3   | 0.811896711                            | N                                            | 0                                      | N                                   |
| NHLRC3       | 0.81196068                             | N                                            | 0                                      | N                                   |
| AC009812.1   | 0.812056599                            | N                                            | 0                                      | N                                   |
| AC126323.2   | 0.812056599                            | N                                            | 0                                      | N                                   |
| C11orf68     | 0.812056599                            | N                                            | 0                                      | N                                   |
| CC2D2A       | 0.812073337                            | N                                            | 0                                      | N                                   |
| BAALC-AS1    | 0.81245946                             | N                                            | 0                                      | N                                   |
| ERCC1        | 0.81245946                             | N                                            | 7                                      | N                                   |
| RBPJ         | 0.81245946                             | N                                            | 8                                      | N                                   |
| AC105020.3   | 0.812807886                            | N                                            | 0                                      | N                                   |
| AL139274.2   | 0.812807886                            | N                                            | 0                                      | N                                   |
| AL592148.3   | 0.812807886                            | N                                            | 0                                      | N                                   |
| C14orf93     | 0.812807886                            | N                                            | 0                                      | N                                   |
| SERPING1     | 0.812807886                            | N                                            | 9                                      | N                                   |
| EEF1GP5      | 0.812807951                            | N                                            | 0                                      | N                                   |
| SETD6        | 0.812876974                            | N                                            | 0                                      | N                                   |
| DYRK3        | 0.81289994                             | N                                            | 0                                      | N                                   |
| CEP170       | 0.812945115                            | N                                            | 0                                      | N                                   |
| CTSV         | 0.812945115                            | N                                            | 1                                      | N                                   |
| DUXAP8       | 0.812945115                            | N                                            | 0                                      | N                                   |
| AC009126.1   | 0.812969323                            | N                                            | 0                                      | N                                   |
| CD9          | 0.812969323                            | N                                            | 22                                     | N                                   |
| ENO3         | 0.812969323                            | N                                            | 2                                      | N                                   |
| LMO2         | 0.812969323                            | N                                            | 2                                      | N                                   |
| SGPP1        | 0.812969323                            | N                                            | 3                                      | N                                   |
| SMCO4        | 0.812969323                            | N                                            | 0                                      | N                                   |
| THAP9        | 0.812969323                            | N                                            | 0                                      | N                                   |
| AC005828.7   | 0.812982717                            | N                                            | 0                                      | N                                   |
| ST7          | 0.812982717                            | N                                            | 5                                      | N                                   |
| NKX6-1       | 0.813266885                            | N                                            | 293                                    | Y                                   |
| ARHGEF10     | 0.813330827                            | N                                            | 1                                      | N                                   |
| AC055733.1   | 0.813454246                            | N                                            | 0                                      | N                                   |
| C19orf54     | 0.813454246                            | N                                            | 0                                      | N                                   |
| KAT7         | 0.813454246                            | N                                            | 0                                      | N                                   |
| MMP28        | 0.813454246                            | N                                            | 0                                      | N                                   |
| TGM2         | 0.813454246                            | N                                            | 9                                      | N                                   |
| TMEM8B       | 0.813454246                            | N                                            | 0                                      | N                                   |
| UBAP1L       | 0.813454246                            | N                                            | 0                                      | N                                   |
| ZNF141       | 0.813454246                            | N                                            | 0                                      | N                                   |
| TRIM8        | 0.813588467                            | N                                            | 2                                      | N                                   |
| ZNF695       | 0.813588467                            | N                                            | 0                                      | N                                   |
| BGLAP        | 0.813681001                            | N                                            | 17                                     | N                                   |
| COPS2        | 0.813681001                            | N                                            | 0                                      | N                                   |
| SAMD13       | 0.813681001                            | N                                            | 0                                      | N                                   |
| AC006058.1   | 0.813702981                            | N                                            | 0                                      | N                                   |
| AL133243.3   | 0.813702981                            | N                                            | 0                                      | N                                   |
| CANX         | 0.813702981                            | N                                            | 1                                      | N                                   |
| CYP2J2       | 0.813702981                            | N                                            | 11                                     | N                                   |
| DHX40        | 0.813702981                            | N                                            | 0                                      | N                                   |
| KCNIP4       | 0.813702981                            | N                                            | 0                                      | N                                   |
| MOB3B        | 0.813702981                            | N                                            | 0                                      | N                                   |
| OSBPL7       | 0.813702981                            | N                                            | 0                                      | N                                   |
| RPL37P23     | 0.813702981                            | N                                            | 0                                      | N                                   |
| TCEAL8       | 0.813702981                            | N                                            | 0                                      | N                                   |
| TMEM256P1    | 0.813702981                            | N                                            | 0                                      | N                                   |
| VAMP8        | 0.813702981                            | N                                            | 14                                     | N                                   |
| KIZ-AS1      | 0.813887651                            | N                                            | 0                                      | N                                   |
| KRT19        | 0.813887651                            | N                                            | 1                                      | N                                   |

| Gene symbols | FDR (differential expression analysis) | Differentially expressed gene? Y, Yes; N, No | Number of insulin related publications | Insulin related gene? Y, Yes; N, No |
|--------------|----------------------------------------|----------------------------------------------|----------------------------------------|-------------------------------------|
| PRKAR1A      | 0.813887651                            | N                                            | 13                                     | N                                   |
| RPAP2P1      | 0.813887651                            | N                                            | 0                                      | N                                   |
| AL162231.1   | 0.813950799                            | N                                            | 0                                      | N                                   |
| GALNT14      | 0.813972299                            | N                                            | 0                                      | N                                   |
| AC241520.1   | 0.814045863                            | N                                            | 0                                      | N                                   |
| SNHG20       | 0.814045863                            | N                                            | 0                                      | N                                   |
| ZNF778       | 0.814045863                            | N                                            | 0                                      | N                                   |
| AP001505.2   | 0.814070918                            | N                                            | 0                                      | N                                   |
| SNORD3B-2    | 0.814070918                            | N                                            | 0                                      | N                                   |
| CELF1        | 0.81430858                             | N                                            | 12                                     | N                                   |
| AC010680.2   | 0.814363321                            | N                                            | 0                                      | N                                   |
| AC234772.2   | 0.814363321                            | N                                            | 0                                      | N                                   |
| ASPHD1       | 0.814363321                            | N                                            | 0                                      | N                                   |
| ATG4A        | 0.814363321                            | N                                            | 0                                      | N                                   |
| DNMT3A       | 0.814363321                            | N                                            | 62                                     | N                                   |
| EPG5         | 0.814363321                            | N                                            | 0                                      | N                                   |
| FMR1-AS1     | 0.814363321                            | N                                            | 0                                      | N                                   |
| GGCT         | 0.814363321                            | N                                            | 5                                      | N                                   |
| KAT8         | 0.814363321                            | N                                            | 0                                      | N                                   |
| KC6          | 0.814363321                            | N                                            | 0                                      | N                                   |
| LINC01625    | 0.814363321                            | N                                            | 0                                      | N                                   |
| MCRIP2       | 0.814363321                            | N                                            | 0                                      | N                                   |
| MFSD10       | 0.814363321                            | N                                            | 0                                      | N                                   |
| SCN2B        | 0.814363321                            | N                                            | 0                                      | N                                   |
| SDCBPP3      | 0.814363321                            | N                                            | 0                                      | N                                   |
| SEPT10P1     | 0.814363321                            | N                                            | 0                                      | N                                   |
| SETDB2       | 0.814363321                            | N                                            | 0                                      | N                                   |
| SLC35B4      | 0.814363321                            | N                                            | 1                                      | N                                   |
| THUMPD2      | 0.814363321                            | N                                            | 0                                      | N                                   |
| TWIST1       | 0.814363321                            | N                                            | 19                                     | N                                   |
| ZNF691       | 0.814363321                            | N                                            | 0                                      | N                                   |
| MTMR9LP      | 0.814605691                            | N                                            | 0                                      | N                                   |
| RAB27A       | 0.814605691                            | N                                            | 55                                     | N                                   |
| AC055813.1   | 0.814689072                            | N                                            | 0                                      | N                                   |
| AC131212.3   | 0.814689072                            | N                                            | 0                                      | N                                   |
| AL079352.1   | 0.814689072                            | N                                            | 0                                      | N                                   |
| AL136526.1   | 0.814689072                            | N                                            | 0                                      | N                                   |
| AL161729.4   | 0.814689072                            | N                                            | 0                                      | N                                   |
| AL391994.1   | 0.814689072                            | N                                            | 0                                      | N                                   |
| CFAP57       | 0.814689072                            | N                                            | 0                                      | N                                   |
| GAS2L1       | 0.814689072                            | N                                            | 0                                      | N                                   |
| LINC02454    | 0.814689072                            | N                                            | 0                                      | N                                   |
| MSX1         | 0.814689072                            | N                                            | 13                                     | N                                   |
| SALRNA1      | 0.814689072                            | N                                            | 1                                      | N                                   |
| TSPAN19      | 0.814689072                            | N                                            | 0                                      | N                                   |
| PDXK         | 0.814735965                            | N                                            | 3                                      | N                                   |
| IFI16        | 0.81476645                             | N                                            | 2                                      | N                                   |
| ZNF793-AS1   | 0.814902041                            | N                                            | 0                                      | N                                   |
| AC011389.3   | 0.814923886                            | N                                            | 0                                      | N                                   |
| AC021683.3   | 0.814923886                            | N                                            | 0                                      | N                                   |
| EIF4EBP3     | 0.814923886                            | N                                            | 1                                      | N                                   |
| FAM178B      | 0.814923886                            | N                                            | 0                                      | N                                   |
| HHAT         | 0.814923886                            | N                                            | 1                                      | N                                   |
| ICE1         | 0.814923886                            | N                                            | 0                                      | N                                   |
| KIF3C        | 0.814923886                            | N                                            | 0                                      | N                                   |
| KRT222       | 0.814923886                            | N                                            | 0                                      | N                                   |
| LHFPL5       | 0.814923886                            | N                                            | 0                                      | N                                   |
| MED28        | 0.814923886                            | N                                            | 0                                      | N                                   |
| NWD2         | 0.814923886                            | N                                            | 1                                      | N                                   |
| ODCP         | 0.814923886                            | N                                            | 0                                      | N                                   |
| PRRT3-AS1    | 0.814923886                            | N                                            | 0                                      | N                                   |
| RN7SL73P     | 0.814923886                            | N                                            | 0                                      | N                                   |
| ZNF814       | 0.814923886                            | N                                            | 0                                      | N                                   |
| UTP4         | 0.815157891                            | N                                            | 0                                      | N                                   |
| NSUN4        | 0.815318734                            | N                                            | 1                                      | N                                   |
| AC008622.2   | 0.81538508                             | N                                            | 0                                      | N                                   |

| Gene symbols | FDR (differential expression analysis) | Differentially expressed gene? Y, Yes; N, No | Number of insulin related publications | Insulin related gene? Y, Yes; N, No |
|--------------|----------------------------------------|----------------------------------------------|----------------------------------------|-------------------------------------|
| UVSSA        | 0.815442164                            | N                                            | 0                                      | N                                   |
| AC124068.1   | 0.815469335                            | N                                            | 0                                      | N                                   |
| AC135050.3   | 0.815512108                            | N                                            | 0                                      | N                                   |
| AFG3L2       | 0.815555199                            | N                                            | 0                                      | N                                   |
| AC091181.1   | 0.81558207                             | N                                            | 0                                      | N                                   |
| AC108451.1   | 0.81558207                             | N                                            | 0                                      | N                                   |
| AC137627.1   | 0.81558207                             | N                                            | 0                                      | N                                   |
| AC239798.4   | 0.81558207                             | N                                            | 0                                      | N                                   |
| CAB39        | 0.81558207                             | N                                            | 0                                      | N                                   |
| FBXO45       | 0.81558207                             | N                                            | 1                                      | N                                   |
| GSTT2B       | 0.81558207                             | N                                            | 0                                      | N                                   |
| IMMP1LP2     | 0.81558207                             | N                                            | 0                                      | N                                   |
| MKNK1        | 0.81558207                             | N                                            | 11                                     | N                                   |
| PKN2         | 0.81558207                             | N                                            | 3                                      | N                                   |
| SCARNA15     | 0.81558207                             | N                                            | 0                                      | N                                   |
| SEC22C       | 0.81558207                             | N                                            | 0                                      | N                                   |
| SLC25A46     | 0.81558207                             | N                                            | 0                                      | N                                   |
| WDR89        | 0.81558207                             | N                                            | 0                                      | N                                   |
| AP000487.1   | 0.81563097                             | N                                            | 0                                      | N                                   |
| IYD          | 0.81583253                             | N                                            | 3                                      | N                                   |
| KCNN4        | 0.81583253                             | N                                            | 6                                      | N                                   |
| MANEAL       | 0.815851531                            | N                                            | 0                                      | N                                   |
| MAP3K20-AS1  | 0.815991852                            | N                                            | 0                                      | N                                   |
| AC010776.2   | 0.816013893                            | N                                            | 0                                      | N                                   |
| AC130472.1   | 0.816013893                            | N                                            | 0                                      | N                                   |
| BROX         | 0.816013893                            | N                                            | 3                                      | N                                   |
| DOCK5        | 0.816013893                            | N                                            | 2                                      | N                                   |
| H19          | 0.816013893                            | N                                            | 807                                    | Y                                   |
| INSL6        | 0.816013893                            | N                                            | 26                                     | N                                   |
| PPTC7        | 0.816013893                            | N                                            | 0                                      | N                                   |
| TNFRSF1B     | 0.816013893                            | N                                            | 17                                     | N                                   |
| TBX2-AS1     | 0.816203274                            | N                                            | 0                                      | N                                   |
| SLK          | 0.816234666                            | N                                            | 2                                      | N                                   |
| TTY15        | 0.816267672                            | N                                            | 0                                      | N                                   |
| AC110285.7   | 0.816436544                            | N                                            | 0                                      | N                                   |
| ATP11A       | 0.816436544                            | N                                            | 0                                      | N                                   |
| DOC2A        | 0.816436544                            | N                                            | 1                                      | N                                   |
| EPHA1        | 0.816436544                            | N                                            | 3                                      | N                                   |
| HDAC4        | 0.816436544                            | N                                            | 34                                     | N                                   |
| STAG2        | 0.816436544                            | N                                            | 1                                      | N                                   |
| SVIL         | 0.816436544                            | N                                            | 0                                      | N                                   |
| LINC01761    | 0.816583936                            | N                                            | 0                                      | N                                   |
| BTBD18       | 0.816596647                            | N                                            | 0                                      | N                                   |
| AC006145.1   | 0.81661451                             | N                                            | 0                                      | N                                   |
| AC009152.1   | 0.81661451                             | N                                            | 0                                      | N                                   |
| AC009779.4   | 0.81661451                             | N                                            | 0                                      | N                                   |
| AC108134.3   | 0.81661451                             | N                                            | 0                                      | N                                   |
| BTG1         | 0.81661451                             | N                                            | 2                                      | N                                   |
| GHR          | 0.81661451                             | N                                            | 839                                    | Y                                   |
| KCNT2        | 0.81661451                             | N                                            | 2                                      | N                                   |
| KLF3-AS1     | 0.81661451                             | N                                            | 0                                      | N                                   |
| PLA2G4D      | 0.81661451                             | N                                            | 0                                      | N                                   |
| SFXN3        | 0.81661451                             | N                                            | 1                                      | N                                   |
| SOAT2        | 0.81661451                             | N                                            | 2                                      | N                                   |
| TXK          | 0.81661451                             | N                                            | 2                                      | N                                   |
| AC099506.2   | 0.816629181                            | N                                            | 0                                      | N                                   |
| PPIF         | 0.816629181                            | N                                            | 6                                      | N                                   |
| YWHAZP3      | 0.816810257                            | N                                            | 0                                      | N                                   |
| BMS1P1       | 0.816867758                            | N                                            | 0                                      | N                                   |
| HSP90AB1     | 0.816867758                            | N                                            | 5                                      | N                                   |
| PCGF7P       | 0.816867758                            | N                                            | 0                                      | N                                   |
| RSPO3        | 0.816867758                            | N                                            | 6                                      | N                                   |
| STK26        | 0.816867758                            | N                                            | 0                                      | N                                   |
| PRR14        | 0.816918246                            | N                                            | 0                                      | N                                   |
| LNPB         | 0.817206239                            | N                                            | 0                                      | N                                   |
| S100A5       | 0.817206239                            | N                                            | 1                                      | N                                   |

| Gene symbols | FDR (differential expression analysis) | Differentially expressed gene? Y, Yes; N, No | Number of insulin related publications | Insulin related gene? Y, Yes; N, No |
|--------------|----------------------------------------|----------------------------------------------|----------------------------------------|-------------------------------------|
| TLE6         | 0.817206239                            | N                                            | 1                                      | N                                   |
| CSPP1        | 0.817210407                            | N                                            | 0                                      | N                                   |
| AC068946.1   | 0.817262901                            | N                                            | 0                                      | N                                   |
| PQLC2        | 0.81726791                             | N                                            | 0                                      | N                                   |
| AC008429.1   | 0.817331327                            | N                                            | 0                                      | N                                   |
| ATP13A2      | 0.817331327                            | N                                            | 0                                      | N                                   |
| POU5F1B      | 0.817368473                            | N                                            | 0                                      | N                                   |
| AC009133.1   | 0.817588939                            | N                                            | 0                                      | N                                   |
| CLIP1        | 0.817588939                            | N                                            | 0                                      | N                                   |
| PEX11G       | 0.817642556                            | N                                            | 1                                      | N                                   |
| ARIH2OS      | 0.817658                               | N                                            | 0                                      | N                                   |
| ATP5H        | 0.817658                               | N                                            | 2                                      | N                                   |
| FUZ          | 0.817658                               | N                                            | 2                                      | N                                   |
| KCTD11       | 0.817658                               | N                                            | 0                                      | N                                   |
| LRRC58       | 0.817658                               | N                                            | 0                                      | N                                   |
| TIMM8AP1     | 0.817658                               | N                                            | 0                                      | N                                   |
| RPARP-AS1    | 0.817738069                            | N                                            | 0                                      | N                                   |
| MRPL44       | 0.817828233                            | N                                            | 0                                      | N                                   |
| ZNF367       | 0.817986839                            | N                                            | 0                                      | N                                   |
| MIR4458HG    | 0.818104135                            | N                                            | 0                                      | N                                   |
| SEC13P1      | 0.818104135                            | N                                            | 0                                      | N                                   |
| SOX21        | 0.818104135                            | N                                            | 0                                      | N                                   |
| XKR8         | 0.818202293                            | N                                            | 0                                      | N                                   |
| MAGEF1       | 0.81831612                             | N                                            | 0                                      | N                                   |
| LINC02482    | 0.818338518                            | N                                            | 0                                      | N                                   |
| AL161932.1   | 0.818411468                            | N                                            | 0                                      | N                                   |
| WRN          | 0.818411468                            | N                                            | 23                                     | N                                   |
| AGTR1        | 0.81841718                             | N                                            | 28                                     | N                                   |
| NET1         | 0.81841718                             | N                                            | 1                                      | N                                   |
| NUDT9P1      | 0.81841718                             | N                                            | 0                                      | N                                   |
| PHYHD1       | 0.81841718                             | N                                            | 0                                      | N                                   |
| RASL11A      | 0.81841718                             | N                                            | 0                                      | N                                   |
| RPL35AP21    | 0.81841718                             | N                                            | 0                                      | N                                   |
| SLC8A3       | 0.81841718                             | N                                            | 1                                      | N                                   |
| AC005865.2   | 0.818437665                            | N                                            | 0                                      | N                                   |
| AC026202.2   | 0.818437665                            | N                                            | 0                                      | N                                   |
| AP5Z1        | 0.818437665                            | N                                            | 0                                      | N                                   |
| ARMC10       | 0.818437665                            | N                                            | 0                                      | N                                   |
| CYCS         | 0.818437665                            | N                                            | 3                                      | N                                   |
| DCAF13       | 0.818437665                            | N                                            | 0                                      | N                                   |
| EME2         | 0.818437665                            | N                                            | 0                                      | N                                   |
| NLGN1        | 0.818437665                            | N                                            | 0                                      | N                                   |
| NOC2LP2      | 0.818437665                            | N                                            | 0                                      | N                                   |
| PLEKHG6      | 0.818437665                            | N                                            | 0                                      | N                                   |
| SORCS2       | 0.818437665                            | N                                            | 6                                      | N                                   |
| AC092364.2   | 0.818473929                            | N                                            | 0                                      | N                                   |
| AL031118.1   | 0.81851587                             | N                                            | 0                                      | N                                   |
| ANGPTL7      | 0.818517578                            | N                                            | 1                                      | N                                   |
| ANKRD18CP    | 0.818659347                            | N                                            | 0                                      | N                                   |
| ABCA2        | 0.818803862                            | N                                            | 1                                      | N                                   |
| AC007346.1   | 0.818904692                            | N                                            | 0                                      | N                                   |
| AC016876.1   | 0.818904692                            | N                                            | 0                                      | N                                   |
| AC092902.2   | 0.818904692                            | N                                            | 0                                      | N                                   |
| LRFN4        | 0.818904692                            | N                                            | 0                                      | N                                   |
| NPEPL1       | 0.818904692                            | N                                            | 0                                      | N                                   |
| SLC35F3      | 0.818904692                            | N                                            | 0                                      | N                                   |
| ZNF92P3      | 0.818904692                            | N                                            | 0                                      | N                                   |
| LYRM1        | 0.81892252                             | N                                            | 7                                      | N                                   |
| RRP12        | 0.819027998                            | N                                            | 0                                      | N                                   |
| AL162231.3   | 0.819059075                            | N                                            | 0                                      | N                                   |
| C21orf2      | 0.819059075                            | N                                            | 0                                      | N                                   |
| CCNHP1       | 0.819059075                            | N                                            | 0                                      | N                                   |
| CCNT1        | 0.819059075                            | N                                            | 0                                      | N                                   |
| CRISPLD1     | 0.819059075                            | N                                            | 0                                      | N                                   |
| CTSA         | 0.819059075                            | N                                            | 14                                     | N                                   |
| CTSC         | 0.819059075                            | N                                            | 2                                      | N                                   |

| Gene symbols    | FDR (differential expression analysis) | Differentially expressed gene? Y, Yes; N, No | Number of insulin related publications | Insulin related gene? Y, Yes; N, No |
|-----------------|----------------------------------------|----------------------------------------------|----------------------------------------|-------------------------------------|
| DYNC1LI2        | 0.819059075                            | N                                            | 0                                      | N                                   |
| GLI3            | 0.819059075                            | N                                            | 10                                     | N                                   |
| GSPT1           | 0.819059075                            | N                                            | 0                                      | N                                   |
| GXYLT1P6        | 0.819059075                            | N                                            | 0                                      | N                                   |
| HMGB3P4         | 0.819059075                            | N                                            | 0                                      | N                                   |
| HSD11B1L        | 0.819059075                            | N                                            | 0                                      | N                                   |
| LINC01165       | 0.819059075                            | N                                            | 0                                      | N                                   |
| MEDAG           | 0.819059075                            | N                                            | 0                                      | N                                   |
| MYEOV           | 0.819059075                            | N                                            | 1                                      | N                                   |
| PPP2R1B         | 0.819059075                            | N                                            | 1                                      | N                                   |
| RWDD4P2         | 0.819059075                            | N                                            | 0                                      | N                                   |
| SAYSD1          | 0.819059075                            | N                                            | 0                                      | N                                   |
| TAF15           | 0.819059075                            | N                                            | 1                                      | N                                   |
| TOLLIP          | 0.819059075                            | N                                            | 2                                      | N                                   |
| VTI1BP1         | 0.819059075                            | N                                            | 0                                      | N                                   |
| AC011445.2      | 0.81908623                             | N                                            | 0                                      | N                                   |
| AC112504.1      | 0.819261613                            | N                                            | 0                                      | N                                   |
| RIMS3           | 0.819261613                            | N                                            | 0                                      | N                                   |
| AC006330.1      | 0.819272972                            | N                                            | 0                                      | N                                   |
| XPO4            | 0.819272972                            | N                                            | 1                                      | N                                   |
| AL161452.1      | 0.819343496                            | N                                            | 0                                      | N                                   |
| PKD2L2          | 0.819343496                            | N                                            | 0                                      | N                                   |
| CSK             | 0.819404512                            | N                                            | 98                                     | N                                   |
| FAM156A         | 0.819405771                            | N                                            | 0                                      | N                                   |
| DPM3            | 0.819510029                            | N                                            | 0                                      | N                                   |
| ARID4B          | 0.819664555                            | N                                            | 0                                      | N                                   |
| AC010095.1      | 0.819830877                            | N                                            | 0                                      | N                                   |
| AC015795.1      | 0.819830877                            | N                                            | 0                                      | N                                   |
| AC092079.1      | 0.819830877                            | N                                            | 0                                      | N                                   |
| BEND6           | 0.819830877                            | N                                            | 0                                      | N                                   |
| CEP164P1        | 0.819830877                            | N                                            | 0                                      | N                                   |
| GP1BA           | 0.819830877                            | N                                            | 1                                      | N                                   |
| HDAC6           | 0.819830877                            | N                                            | 17                                     | N                                   |
| MIRLET7BHG      | 0.819830877                            | N                                            | 1                                      | N                                   |
| PCGF2           | 0.819830877                            | N                                            | 1                                      | N                                   |
| PVT1            | 0.819830877                            | N                                            | 2                                      | N                                   |
| PYGO2           | 0.819830877                            | N                                            | 1                                      | N                                   |
| RAMP2-AS1       | 0.819830877                            | N                                            | 0                                      | N                                   |
| RNF14           | 0.819830877                            | N                                            | 0                                      | N                                   |
| SLC25A29        | 0.819830877                            | N                                            | 0                                      | N                                   |
| AL136295.1      | 0.819893271                            | N                                            | 0                                      | N                                   |
| AL359764.1      | 0.819893271                            | N                                            | 0                                      | N                                   |
| AL365357.1      | 0.819893271                            | N                                            | 0                                      | N                                   |
| BAIAP3          | 0.819893271                            | N                                            | 2                                      | N                                   |
| HIST1H2AC       | 0.819893271                            | N                                            | 0                                      | N                                   |
| KCNJ5           | 0.819893271                            | N                                            | 3                                      | N                                   |
| RBM39           | 0.819893271                            | N                                            | 0                                      | N                                   |
| RBMXL2          | 0.819893271                            | N                                            | 0                                      | N                                   |
| RP11-524D16_A.3 | 0.819893271                            | N                                            | 0                                      | N                                   |
| SLC6A20         | 0.819893271                            | N                                            | 0                                      | N                                   |
| ZSCAN22         | 0.819893271                            | N                                            | 0                                      | N                                   |
| AC022182.2      | 0.820365014                            | N                                            | 0                                      | N                                   |
| AGGF1           | 0.820365014                            | N                                            | 1                                      | N                                   |
| C6orf136        | 0.820365014                            | N                                            | 0                                      | N                                   |
| DNAJC9-AS1      | 0.820365014                            | N                                            | 0                                      | N                                   |
| FOXQ1           | 0.820365014                            | N                                            | 3                                      | N                                   |
| PHBP13          | 0.820365014                            | N                                            | 0                                      | N                                   |
| SNAPC2          | 0.820396959                            | N                                            | 0                                      | N                                   |
| ATP2A1          | 0.820424177                            | N                                            | 5                                      | N                                   |
| GFRA2           | 0.820490471                            | N                                            | 1                                      | N                                   |
| NDOR1           | 0.820490471                            | N                                            | 0                                      | N                                   |
| PTPRE           | 0.820542445                            | N                                            | 4                                      | N                                   |
| RRP9            | 0.820542445                            | N                                            | 0                                      | N                                   |
| TCAIM           | 0.820542445                            | N                                            | 0                                      | N                                   |
| METTTL26        | 0.820544427                            | N                                            | 0                                      | N                                   |
| AC093768.1      | 0.820556699                            | N                                            | 0                                      | N                                   |

| Gene symbols | FDR (differential expression analysis) | Differentially expressed gene? Y, Yes; N, No | Number of insulin related publications | Insulin related gene? Y, Yes; N, No |
|--------------|----------------------------------------|----------------------------------------------|----------------------------------------|-------------------------------------|
| ARHGEF28     | 0.820556699                            | N                                            | 0                                      | N                                   |
| DTX2         | 0.820556699                            | N                                            | 0                                      | N                                   |
| AL157871.3   | 0.820634626                            | N                                            | 0                                      | N                                   |
| AC004825.2   | 0.820871477                            | N                                            | 0                                      | N                                   |
| AC106795.1   | 0.820871477                            | N                                            | 0                                      | N                                   |
| AC122718.2   | 0.820871477                            | N                                            | 0                                      | N                                   |
| AC132812.2   | 0.820871477                            | N                                            | 0                                      | N                                   |
| ADAT3        | 0.820871477                            | N                                            | 0                                      | N                                   |
| AL731577.1   | 0.820871477                            | N                                            | 0                                      | N                                   |
| DDX50        | 0.820871477                            | N                                            | 0                                      | N                                   |
| ELFN1        | 0.820871477                            | N                                            | 0                                      | N                                   |
| GRIN2A       | 0.820871477                            | N                                            | 2                                      | N                                   |
| SSH3         | 0.820871477                            | N                                            | 0                                      | N                                   |
| TTL10-AS1    | 0.820871477                            | N                                            | 0                                      | N                                   |
| FNTAP2       | 0.820921054                            | N                                            | 0                                      | N                                   |
| NUMBL        | 0.820941226                            | N                                            | 0                                      | N                                   |
| RPL35        | 0.821158283                            | N                                            | 0                                      | N                                   |
| AC007308.6   | 0.821197818                            | N                                            | 0                                      | N                                   |
| AC126474.2   | 0.821197818                            | N                                            | 0                                      | N                                   |
| ADAP1        | 0.821197818                            | N                                            | 1                                      | N                                   |
| TAF7         | 0.821197818                            | N                                            | 0                                      | N                                   |
| TTL12        | 0.821197818                            | N                                            | 0                                      | N                                   |
| PSMD8P1      | 0.821232594                            | N                                            | 0                                      | N                                   |
| GPER1        | 0.821330253                            | N                                            | 37                                     | N                                   |
| CBR4         | 0.821375202                            | N                                            | 2                                      | N                                   |
| RABEP2       | 0.821375202                            | N                                            | 0                                      | N                                   |
| RPIA         | 0.821375202                            | N                                            | 1                                      | N                                   |
| SLC25A38     | 0.821375202                            | N                                            | 1                                      | N                                   |
| AC021491.2   | 0.821429771                            | N                                            | 0                                      | N                                   |
| C11orf72     | 0.821445797                            | N                                            | 0                                      | N                                   |
| AC025538.1   | 0.821497036                            | N                                            | 0                                      | N                                   |
| CHGB         | 0.821497036                            | N                                            | 11                                     | N                                   |
| FAM171A1     | 0.821497036                            | N                                            | 0                                      | N                                   |
| LY6G5B       | 0.821497036                            | N                                            | 0                                      | N                                   |
| AC005736.1   | 0.821561919                            | N                                            | 0                                      | N                                   |
| AC006001.2   | 0.821561919                            | N                                            | 0                                      | N                                   |
| AL049840.3   | 0.821561919                            | N                                            | 0                                      | N                                   |
| ANP32BP3     | 0.821561919                            | N                                            | 0                                      | N                                   |
| AP001781.3   | 0.821561919                            | N                                            | 0                                      | N                                   |
| FPR2         | 0.821561919                            | N                                            | 7                                      | N                                   |
| GLUD1        | 0.821561919                            | N                                            | 52                                     | N                                   |
| JAK2         | 0.821561919                            | N                                            | 476                                    | Y                                   |
| PSPN         | 0.821561919                            | N                                            | 0                                      | N                                   |
| RHOJ         | 0.821561919                            | N                                            | 0                                      | N                                   |
| TUBGCP6      | 0.821561919                            | N                                            | 0                                      | N                                   |
| FITM2        | 0.821611288                            | N                                            | 4                                      | N                                   |
| AC091178.1   | 0.821865407                            | N                                            | 0                                      | N                                   |
| AC005306.1   | 0.821878282                            | N                                            | 0                                      | N                                   |
| DHX32        | 0.821878282                            | N                                            | 0                                      | N                                   |
| HNRNPA0      | 0.821878282                            | N                                            | 0                                      | N                                   |
| POLR3A       | 0.821878282                            | N                                            | 0                                      | N                                   |
| TAS2R14      | 0.821878282                            | N                                            | 0                                      | N                                   |
| TNXB         | 0.821878282                            | N                                            | 1                                      | N                                   |
| PCDHB6       | 0.821886331                            | N                                            | 0                                      | N                                   |
| AC023906.1   | 0.821902953                            | N                                            | 0                                      | N                                   |
| ZIM2-AS1     | 0.822015852                            | N                                            | 0                                      | N                                   |
| GPHN         | 0.822054314                            | N                                            | 0                                      | N                                   |
| ABHD18       | 0.822242048                            | N                                            | 0                                      | N                                   |
| BOLA3-AS1    | 0.822242048                            | N                                            | 0                                      | N                                   |
| ABCA17P      | 0.822245093                            | N                                            | 0                                      | N                                   |
| AC022007.1   | 0.822245093                            | N                                            | 0                                      | N                                   |
| AC079601.1   | 0.822245093                            | N                                            | 0                                      | N                                   |
| AC090181.2   | 0.822245093                            | N                                            | 0                                      | N                                   |
| AL353608.4   | 0.822245093                            | N                                            | 0                                      | N                                   |
| AP5B1        | 0.822245093                            | N                                            | 0                                      | N                                   |
| C5AR2        | 0.822245093                            | N                                            | 15                                     | N                                   |



| Gene symbols | FDR (differential expression analysis) | Differentially expressed gene? Y, Yes; N, No | Number of insulin related publications | Insulin related gene? Y, Yes; N, No |
|--------------|----------------------------------------|----------------------------------------------|----------------------------------------|-------------------------------------|
| HSBP1P2      | 0.822245093                            | N                                            | 0                                      | N                                   |
| MFSD14C      | 0.822245093                            | N                                            | 0                                      | N                                   |
| RCC2         | 0.822245093                            | N                                            | 0                                      | N                                   |
| SF3B5        | 0.822245093                            | N                                            | 0                                      | N                                   |
| STUB1        | 0.822245093                            | N                                            | 9                                      | N                                   |
| TMUB2        | 0.822245093                            | N                                            | 0                                      | N                                   |
| TRIML2       | 0.822245093                            | N                                            | 0                                      | N                                   |
| AL592429.1   | 0.822342414                            | N                                            | 0                                      | N                                   |
| DIS3         | 0.822342414                            | N                                            | 2                                      | N                                   |
| FGD1         | 0.822342414                            | N                                            | 0                                      | N                                   |
| MYC          | 0.822342414                            | N                                            | 916                                    | Y                                   |
| RSBN1        | 0.822342414                            | N                                            | 0                                      | N                                   |
| SMARCC2      | 0.822342414                            | N                                            | 0                                      | N                                   |
| GSTM3P2      | 0.822380238                            | N                                            | 0                                      | N                                   |
| HNRNPH1P1    | 0.822380238                            | N                                            | 0                                      | N                                   |
| HIST2H4B     | 0.82242186                             | N                                            | 0                                      | N                                   |
| L2HGDH       | 0.82242186                             | N                                            | 0                                      | N                                   |
| PRRX2        | 0.82242186                             | N                                            | 3                                      | N                                   |
| TBXA2R       | 0.82242186                             | N                                            | 13                                     | N                                   |
| AC243654.2   | 0.822563607                            | N                                            | 0                                      | N                                   |
| FLG-AS1      | 0.822563607                            | N                                            | 0                                      | N                                   |
| UBE2V2       | 0.822563607                            | N                                            | 1                                      | N                                   |
| ZNF292       | 0.822563607                            | N                                            | 0                                      | N                                   |
| PCED1A       | 0.822643474                            | N                                            | 0                                      | N                                   |
| AC008575.1   | 0.822832163                            | N                                            | 0                                      | N                                   |
| AL513550.1   | 0.822832163                            | N                                            | 0                                      | N                                   |
| DNM3         | 0.822894135                            | N                                            | 0                                      | N                                   |
| LINC00854    | 0.822894135                            | N                                            | 0                                      | N                                   |
| NDUFAB1      | 0.822894135                            | N                                            | 1                                      | N                                   |
| TAF1A-AS1    | 0.822894135                            | N                                            | 0                                      | N                                   |
| ZNF876P      | 0.822894135                            | N                                            | 0                                      | N                                   |
| AL137845.1   | 0.822935986                            | N                                            | 0                                      | N                                   |
| AL139811.1   | 0.823063843                            | N                                            | 0                                      | N                                   |
| AC090617.3   | 0.823107898                            | N                                            | 0                                      | N                                   |
| AC092119.2   | 0.823107898                            | N                                            | 0                                      | N                                   |
| AC093535.1   | 0.823107898                            | N                                            | 0                                      | N                                   |
| AP001476.1   | 0.823107898                            | N                                            | 0                                      | N                                   |
| BAZ1A        | 0.823107898                            | N                                            | 0                                      | N                                   |
| FDXR         | 0.823107898                            | N                                            | 1                                      | N                                   |
| NBPF14       | 0.823107898                            | N                                            | 0                                      | N                                   |
| RGS13        | 0.823107898                            | N                                            | 0                                      | N                                   |
| SNX3         | 0.823107898                            | N                                            | 1                                      | N                                   |
| TTC33        | 0.823107898                            | N                                            | 0                                      | N                                   |
| ZNF782       | 0.823107898                            | N                                            | 0                                      | N                                   |
| ZNF878       | 0.823107898                            | N                                            | 0                                      | N                                   |
| CYTOR        | 0.823127024                            | N                                            | 0                                      | N                                   |
| METRN        | 0.823127024                            | N                                            | 3                                      | N                                   |
| NELFCD       | 0.823127024                            | N                                            | 0                                      | N                                   |
| RXFP1        | 0.823127024                            | N                                            | 122                                    | Y                                   |
| VTI1B        | 0.823130714                            | N                                            | 0                                      | N                                   |
| SLC34A3      | 0.823149274                            | N                                            | 1                                      | N                                   |
| NIN          | 0.823162297                            | N                                            | 58                                     | N                                   |
| ATG101       | 0.823271117                            | N                                            | 0                                      | N                                   |
| HAAO         | 0.823271117                            | N                                            | 0                                      | N                                   |
| MIR3142HG    | 0.823271117                            | N                                            | 0                                      | N                                   |
| SGCE         | 0.823271117                            | N                                            | 7                                      | N                                   |
| C8orf59      | 0.823529879                            | N                                            | 0                                      | N                                   |
| RASGEF1B     | 0.823534583                            | N                                            | 0                                      | N                                   |
| HEXIM2       | 0.823644658                            | N                                            | 0                                      | N                                   |
| AL645728.1   | 0.823686311                            | N                                            | 0                                      | N                                   |
| GTF2A2       | 0.823686311                            | N                                            | 0                                      | N                                   |
| PHTF1        | 0.823686311                            | N                                            | 1                                      | N                                   |
| RNF2         | 0.823686311                            | N                                            | 3                                      | N                                   |
| SERPINE2     | 0.823686311                            | N                                            | 19                                     | N                                   |
| RTL10        | 0.823735075                            | N                                            | 0                                      | N                                   |
| AC012653.2   | 0.82378421                             | N                                            | 0                                      | N                                   |

| Gene symbols | FDR (differential expression analysis) | Differentially expressed gene? Y, Yes; N, No | Number of insulin related publications | Insulin related gene? Y, Yes; N, No |
|--------------|----------------------------------------|----------------------------------------------|----------------------------------------|-------------------------------------|
| AC023301.1   | 0.82378421                             | N                                            | 0                                      | N                                   |
| GMCL1        | 0.82378421                             | N                                            | 0                                      | N                                   |
| SKP2         | 0.82378421                             | N                                            | 28                                     | N                                   |
| GOLGA8J      | 0.823823619                            | N                                            | 0                                      | N                                   |
| NT5DC3       | 0.823823619                            | N                                            | 0                                      | N                                   |
| EFHB         | 0.824290553                            | N                                            | 0                                      | N                                   |
| SLC12A2      | 0.824290553                            | N                                            | 11                                     | N                                   |
| KRBOX4       | 0.824368047                            | N                                            | 0                                      | N                                   |
| ZNF589       | 0.824397703                            | N                                            | 0                                      | N                                   |
| AC010680.4   | 0.824480165                            | N                                            | 0                                      | N                                   |
| AL008727.1   | 0.824480165                            | N                                            | 0                                      | N                                   |
| KRT8         | 0.824480165                            | N                                            | 5                                      | N                                   |
| MTAP         | 0.824480165                            | N                                            | 3                                      | N                                   |
| ZC3H10       | 0.824480165                            | N                                            | 0                                      | N                                   |
| PEG10        | 0.824563283                            | N                                            | 11                                     | N                                   |
| AC133539.1   | 0.824566836                            | N                                            | 0                                      | N                                   |
| Z86062.1     | 0.824566836                            | N                                            | 0                                      | N                                   |
| AC141586.1   | 0.824634684                            | N                                            | 0                                      | N                                   |
| CHID1        | 0.824634684                            | N                                            | 0                                      | N                                   |
| MYO3B        | 0.824634684                            | N                                            | 0                                      | N                                   |
| PPP1R37      | 0.824634684                            | N                                            | 0                                      | N                                   |
| SNRK         | 0.824634684                            | N                                            | 4                                      | N                                   |
| AL355338.1   | 0.824758274                            | N                                            | 0                                      | N                                   |
| NPPA-AS1     | 0.824758274                            | N                                            | 0                                      | N                                   |
| AC011005.1   | 0.824812433                            | N                                            | 0                                      | N                                   |
| AC093536.1   | 0.824812433                            | N                                            | 0                                      | N                                   |
| AC118344.2   | 0.824812433                            | N                                            | 0                                      | N                                   |
| AL031429.2   | 0.824812433                            | N                                            | 0                                      | N                                   |
| AL133445.2   | 0.824812433                            | N                                            | 0                                      | N                                   |
| ARHGAP9      | 0.824812433                            | N                                            | 0                                      | N                                   |
| ATP6V1C2     | 0.824812433                            | N                                            | 0                                      | N                                   |
| BUD31        | 0.824812433                            | N                                            | 0                                      | N                                   |
| DBP          | 0.824812433                            | N                                            | 885                                    | Y                                   |
| ELOVL1       | 0.824812433                            | N                                            | 4                                      | N                                   |
| EMB          | 0.824812433                            | N                                            | 8                                      | N                                   |
| HAPLN1       | 0.824812433                            | N                                            | 1                                      | N                                   |
| LINC02267    | 0.824812433                            | N                                            | 0                                      | N                                   |
| MFSD4A       | 0.824812433                            | N                                            | 1                                      | N                                   |
| MKRN2        | 0.824812433                            | N                                            | 0                                      | N                                   |
| PCSK4        | 0.824812433                            | N                                            | 5                                      | N                                   |
| RPL7L1       | 0.824812433                            | N                                            | 0                                      | N                                   |
| SERPINB8     | 0.824812433                            | N                                            | 2                                      | N                                   |
| TMEM5        | 0.824812433                            | N                                            | 0                                      | N                                   |
| VASH1        | 0.824812433                            | N                                            | 4                                      | N                                   |
| ZBTB17       | 0.824812433                            | N                                            | 1                                      | N                                   |
| AC093908.1   | 0.824874426                            | N                                            | 0                                      | N                                   |
| GPR153       | 0.824874426                            | N                                            | 0                                      | N                                   |
| LINC02204    | 0.824874426                            | N                                            | 0                                      | N                                   |
| TAF2         | 0.824874426                            | N                                            | 0                                      | N                                   |
| AC012213.2   | 0.82490419                             | N                                            | 0                                      | N                                   |
| AC132938.6   | 0.82490419                             | N                                            | 0                                      | N                                   |
| ASL          | 0.82490419                             | N                                            | 101                                    | Y                                   |
| INTS9        | 0.82490419                             | N                                            | 0                                      | N                                   |
| RAB8B        | 0.82490419                             | N                                            | 2                                      | N                                   |
| TIPARP-AS1   | 0.82490419                             | N                                            | 0                                      | N                                   |
| AL162586.1   | 0.824937963                            | N                                            | 0                                      | N                                   |
| AQP11        | 0.824937963                            | N                                            | 0                                      | N                                   |
| COX11        | 0.824937963                            | N                                            | 1                                      | N                                   |
| NAPEPLD      | 0.824937963                            | N                                            | 1                                      | N                                   |
| ORMDL2       | 0.824937963                            | N                                            | 0                                      | N                                   |
| PIGFP1       | 0.824937963                            | N                                            | 0                                      | N                                   |
| SRP68P3      | 0.824937963                            | N                                            | 0                                      | N                                   |
| ST6GALNAC6   | 0.824937963                            | N                                            | 0                                      | N                                   |
| SUCLG2       | 0.824937963                            | N                                            | 1                                      | N                                   |
| SYT12        | 0.824937963                            | N                                            | 0                                      | N                                   |
| TVP23A       | 0.824937963                            | N                                            | 0                                      | N                                   |

| Gene symbols | FDR (differential expression analysis) | Differentially expressed gene? Y, Yes; N, No | Number of insulin related publications | Insulin related gene? Y, Yes; N, No |
|--------------|----------------------------------------|----------------------------------------------|----------------------------------------|-------------------------------------|
| CHD2         | 0.825030126                            | N                                            | 1                                      | N                                   |
| MATR3        | 0.825030126                            | N                                            | 0                                      | N                                   |
| MUC1         | 0.825030126                            | N                                            | 36                                     | N                                   |
| PRKAR2A-AS1  | 0.825030126                            | N                                            | 0                                      | N                                   |
| TMEM132D     | 0.825030126                            | N                                            | 0                                      | N                                   |
| PDIK1L       | 0.825066891                            | N                                            | 0                                      | N                                   |
| FOXA1        | 0.82514139                             | N                                            | 52                                     | N                                   |
| ADCK5        | 0.825148039                            | N                                            | 0                                      | N                                   |
| AKR7A2       | 0.825148039                            | N                                            | 0                                      | N                                   |
| C7orf26      | 0.825148039                            | N                                            | 0                                      | N                                   |
| CHRNA1       | 0.825148039                            | N                                            | 0                                      | N                                   |
| HDAC2-AS2    | 0.825211624                            | N                                            | 0                                      | N                                   |
| BRX1P1       | 0.825305577                            | N                                            | 0                                      | N                                   |
| LRP2BP       | 0.825305577                            | N                                            | 2                                      | N                                   |
| AC008736.1   | 0.825335583                            | N                                            | 0                                      | N                                   |
| GPR161       | 0.825335583                            | N                                            | 0                                      | N                                   |
| MRPS17       | 0.825335583                            | N                                            | 0                                      | N                                   |
| RPL13        | 0.825467045                            | N                                            | 0                                      | N                                   |
| RABAC1       | 0.825522874                            | N                                            | 0                                      | N                                   |
| AC138915.4   | 0.825623345                            | N                                            | 0                                      | N                                   |
| C4orf22      | 0.825623345                            | N                                            | 0                                      | N                                   |
| AC006518.1   | 0.825624821                            | N                                            | 0                                      | N                                   |
| PKN1         | 0.825624821                            | N                                            | 0                                      | N                                   |
| CCDC28B      | 0.825625819                            | N                                            | 0                                      | N                                   |
| FBXO31       | 0.825625819                            | N                                            | 1                                      | N                                   |
| SNRNP200     | 0.825625819                            | N                                            | 0                                      | N                                   |
| STXBP6       | 0.825625819                            | N                                            | 1                                      | N                                   |
| HMGXB3       | 0.825693369                            | N                                            | 0                                      | N                                   |
| AC100757.1   | 0.82573236                             | N                                            | 0                                      | N                                   |
| AL136379.1   | 0.82573236                             | N                                            | 0                                      | N                                   |
| CCDC65       | 0.825929374                            | N                                            | 0                                      | N                                   |
| ESYT3        | 0.825929374                            | N                                            | 0                                      | N                                   |
| METTL5       | 0.825929374                            | N                                            | 0                                      | N                                   |
| PFN1         | 0.825929374                            | N                                            | 1                                      | N                                   |
| RPSAP16      | 0.825929374                            | N                                            | 0                                      | N                                   |
| AC005696.1   | 0.825960384                            | N                                            | 0                                      | N                                   |
| AC111170.3   | 0.826042342                            | N                                            | 0                                      | N                                   |
| SOCS7        | 0.826106187                            | N                                            | 13                                     | N                                   |
| AC073343.2   | 0.826149119                            | N                                            | 0                                      | N                                   |
| COMT         | 0.826149119                            | N                                            | 37                                     | N                                   |
| LUC7L        | 0.826149119                            | N                                            | 0                                      | N                                   |
| OXLD1        | 0.826149119                            | N                                            | 0                                      | N                                   |
| SUZ12P1      | 0.826149119                            | N                                            | 0                                      | N                                   |
| CFL1P5       | 0.826228329                            | N                                            | 0                                      | N                                   |
| IMP4         | 0.826228329                            | N                                            | 0                                      | N                                   |
| AC005670.2   | 0.826618734                            | N                                            | 0                                      | N                                   |
| AC007342.3   | 0.826618734                            | N                                            | 0                                      | N                                   |
| AC020904.2   | 0.826618734                            | N                                            | 0                                      | N                                   |
| AC124303.2   | 0.826618734                            | N                                            | 0                                      | N                                   |
| C7orf43      | 0.826618734                            | N                                            | 0                                      | N                                   |
| CATSPERG     | 0.826618734                            | N                                            | 0                                      | N                                   |
| ERGIC2       | 0.826618734                            | N                                            | 0                                      | N                                   |
| FHL3         | 0.826618734                            | N                                            | 1                                      | N                                   |
| FLG2         | 0.826618734                            | N                                            | 0                                      | N                                   |
| FOXA2        | 0.826618734                            | N                                            | 199                                    | Y                                   |
| HECTD4       | 0.826618734                            | N                                            | 1                                      | N                                   |
| REEP6        | 0.826618734                            | N                                            | 0                                      | N                                   |
| TBC1D9       | 0.826618734                            | N                                            | 1                                      | N                                   |
| ZMIZ1-AS1    | 0.826618734                            | N                                            | 0                                      | N                                   |
| TPTE2P1      | 0.826658246                            | N                                            | 0                                      | N                                   |
| AC034102.1   | 0.826709724                            | N                                            | 0                                      | N                                   |
| AC106782.2   | 0.826709724                            | N                                            | 0                                      | N                                   |
| AC110615.1   | 0.826709724                            | N                                            | 0                                      | N                                   |
| COX6B2       | 0.826709724                            | N                                            | 0                                      | N                                   |
| CXorf38      | 0.826709724                            | N                                            | 0                                      | N                                   |
| EPB41L5      | 0.826709724                            | N                                            | 0                                      | N                                   |

| Gene symbols | FDR (differential expression analysis) | Differentially expressed gene? Y, Yes; N, No | Number of insulin related publications | Insulin related gene? Y, Yes; N, No |
|--------------|----------------------------------------|----------------------------------------------|----------------------------------------|-------------------------------------|
| GLTP         | 0.826709724                            | N                                            | 0                                      | N                                   |
| INHBA        | 0.826709724                            | N                                            | 12                                     | N                                   |
| LINC02344    | 0.826709724                            | N                                            | 0                                      | N                                   |
| TM4SF19-AS1  | 0.826709724                            | N                                            | 0                                      | N                                   |
| TMEM141      | 0.826709724                            | N                                            | 0                                      | N                                   |
| AC090527.2   | 0.826751253                            | N                                            | 0                                      | N                                   |
| BMI1         | 0.826891237                            | N                                            | 11                                     | N                                   |
| FLJ22447     | 0.826931034                            | N                                            | 0                                      | N                                   |
| MS4A7        | 0.826931034                            | N                                            | 0                                      | N                                   |
| PSG4         | 0.826931034                            | N                                            | 0                                      | N                                   |
| SLC4A4       | 0.826931034                            | N                                            | 11                                     | N                                   |
| AC026355.2   | 0.827277507                            | N                                            | 0                                      | N                                   |
| AC105020.1   | 0.827277507                            | N                                            | 0                                      | N                                   |
| LINC00506    | 0.827277507                            | N                                            | 0                                      | N                                   |
| SEPT7        | 0.827316615                            | N                                            | 3                                      | N                                   |
| AC007744.1   | 0.827316615                            | N                                            | 0                                      | N                                   |
| AC080078.2   | 0.827316615                            | N                                            | 0                                      | N                                   |
| AL391001.1   | 0.827316615                            | N                                            | 0                                      | N                                   |
| FOXP2        | 0.827316615                            | N                                            | 0                                      | N                                   |
| LCA5         | 0.827316615                            | N                                            | 1                                      | N                                   |
| PAFAH1B2     | 0.827316615                            | N                                            | 0                                      | N                                   |
| RMST         | 0.827316615                            | N                                            | 1                                      | N                                   |
| SZT2-AS1     | 0.827316615                            | N                                            | 0                                      | N                                   |
| TEX41        | 0.827316615                            | N                                            | 0                                      | N                                   |
| CDK5RAP3     | 0.827324803                            | N                                            | 1                                      | N                                   |
| NUTF2        | 0.827504797                            | N                                            | 0                                      | N                                   |
| TUFM         | 0.827710422                            | N                                            | 0                                      | N                                   |
| IVD          | 0.827724077                            | N                                            | 42                                     | N                                   |
| PDCD2        | 0.827724077                            | N                                            | 0                                      | N                                   |
| SNORA13      | 0.827724077                            | N                                            | 0                                      | N                                   |
| SNX6         | 0.827724077                            | N                                            | 2                                      | N                                   |
| PRPF4B       | 0.827741361                            | N                                            | 0                                      | N                                   |
| ANKRD20A8P   | 0.828012562                            | N                                            | 0                                      | N                                   |
| LRRC46       | 0.828508355                            | N                                            | 0                                      | N                                   |
| OR2C3        | 0.828508355                            | N                                            | 0                                      | N                                   |
| AC005730.3   | 0.828602648                            | N                                            | 0                                      | N                                   |
| GPS1         | 0.828602648                            | N                                            | 2                                      | N                                   |
| VWA7         | 0.828602648                            | N                                            | 0                                      | N                                   |
| AC022968.1   | 0.828765592                            | N                                            | 0                                      | N                                   |
| ATP5F1       | 0.828765592                            | N                                            | 2                                      | N                                   |
| COL18A1-AS1  | 0.828765592                            | N                                            | 0                                      | N                                   |
| PRR18        | 0.828765592                            | N                                            | 0                                      | N                                   |
| S1PR2        | 0.828765592                            | N                                            | 7                                      | N                                   |
| SFRP2        | 0.828765592                            | N                                            | 13                                     | N                                   |
| AF131216.1   | 0.828784152                            | N                                            | 0                                      | N                                   |
| AC016027.2   | 0.828813038                            | N                                            | 0                                      | N                                   |
| C20orf27     | 0.828813038                            | N                                            | 0                                      | N                                   |
| DYNLRB1      | 0.828813038                            | N                                            | 0                                      | N                                   |
| TAF11        | 0.828813038                            | N                                            | 0                                      | N                                   |
| MARK2        | 0.828867464                            | N                                            | 16                                     | N                                   |
| AC005332.10  | 0.828913333                            | N                                            | 0                                      | N                                   |
| AC008443.1   | 0.828913333                            | N                                            | 0                                      | N                                   |
| AC008567.2   | 0.828913333                            | N                                            | 0                                      | N                                   |
| AC010735.1   | 0.828913333                            | N                                            | 0                                      | N                                   |
| AC022400.7   | 0.828913333                            | N                                            | 0                                      | N                                   |
| AC027290.2   | 0.828913333                            | N                                            | 0                                      | N                                   |
| AC044810.2   | 0.828913333                            | N                                            | 0                                      | N                                   |
| AC069218.1   | 0.828913333                            | N                                            | 0                                      | N                                   |
| AC104164.1   | 0.828913333                            | N                                            | 0                                      | N                                   |
| AC109466.1   | 0.828913333                            | N                                            | 0                                      | N                                   |
| AC117395.2   | 0.828913333                            | N                                            | 0                                      | N                                   |
| AC139792.2   | 0.828913333                            | N                                            | 0                                      | N                                   |
| ACAA1        | 0.828913333                            | N                                            | 5                                      | N                                   |
| AFF2         | 0.828913333                            | N                                            | 0                                      | N                                   |
| AL035071.1   | 0.828913333                            | N                                            | 0                                      | N                                   |
| AL133243.1   | 0.828913333                            | N                                            | 0                                      | N                                   |

| Gene symbols   | FDR (differential expression analysis) | Differentially expressed gene? Y, Yes; N, No | Number of insulin related publications | Insulin related gene? Y, Yes; N, No |
|----------------|----------------------------------------|----------------------------------------------|----------------------------------------|-------------------------------------|
| AL138767.1     | 0.828913333                            | N                                            | 0                                      | N                                   |
| AL391095.3     | 0.828913333                            | N                                            | 0                                      | N                                   |
| ANK1           | 0.828913333                            | N                                            | 4                                      | N                                   |
| AP001033.2     | 0.828913333                            | N                                            | 0                                      | N                                   |
| AVPR1A         | 0.828913333                            | N                                            | 4                                      | N                                   |
| CCDC57         | 0.828913333                            | N                                            | 0                                      | N                                   |
| CCDC85B        | 0.828913333                            | N                                            | 0                                      | N                                   |
| CHMP1B         | 0.828913333                            | N                                            | 0                                      | N                                   |
| DDX18P4        | 0.828913333                            | N                                            | 0                                      | N                                   |
| DKFZP434A062   | 0.828913333                            | N                                            | 0                                      | N                                   |
| DNER           | 0.828913333                            | N                                            | 1                                      | N                                   |
| EXTL3-AS1      | 0.828913333                            | N                                            | 0                                      | N                                   |
| FAM86B3P       | 0.828913333                            | N                                            | 0                                      | N                                   |
| GALNT18        | 0.828913333                            | N                                            | 1                                      | N                                   |
| LCP1           | 0.828913333                            | N                                            | 1                                      | N                                   |
| LINC00933      | 0.828913333                            | N                                            | 0                                      | N                                   |
| LINC00971      | 0.828913333                            | N                                            | 0                                      | N                                   |
| LINC01468      | 0.828913333                            | N                                            | 0                                      | N                                   |
| MFS5D8         | 0.828913333                            | N                                            | 0                                      | N                                   |
| OPA1           | 0.828913333                            | N                                            | 33                                     | N                                   |
| PCBP2          | 0.828913333                            | N                                            | 4                                      | N                                   |
| PPAN-P2RY11    | 0.828913333                            | N                                            | 0                                      | N                                   |
| PPIAP11        | 0.828913333                            | N                                            | 0                                      | N                                   |
| PPP1R7         | 0.828913333                            | N                                            | 0                                      | N                                   |
| SLC25A3P1      | 0.828913333                            | N                                            | 0                                      | N                                   |
| TGIF2-C20orf24 | 0.828913333                            | N                                            | 0                                      | N                                   |
| THOC7          | 0.828913333                            | N                                            | 0                                      | N                                   |
| U2AF1L4        | 0.828913333                            | N                                            | 0                                      | N                                   |
| UBE2O          | 0.828913333                            | N                                            | 1                                      | N                                   |
| ULK4           | 0.828913333                            | N                                            | 0                                      | N                                   |
| UNC13D         | 0.828913333                            | N                                            | 0                                      | N                                   |
| WFDC1          | 0.828913333                            | N                                            | 0                                      | N                                   |
| ZBTB8B         | 0.828913333                            | N                                            | 0                                      | N                                   |
| CAND2          | 0.828927369                            | N                                            | 0                                      | N                                   |
| ITPK1          | 0.829060407                            | N                                            | 2                                      | N                                   |
| MSMP           | 0.829060407                            | N                                            | 0                                      | N                                   |
| NSRP1          | 0.829074628                            | N                                            | 0                                      | N                                   |
| AC019131.2     | 0.829240469                            | N                                            | 0                                      | N                                   |
| TERC           | 0.829413153                            | N                                            | 10                                     | N                                   |
| CDK5R1         | 0.829505184                            | N                                            | 6                                      | N                                   |
| TIMM23B        | 0.829505184                            | N                                            | 0                                      | N                                   |
| TOX4P1         | 0.829599511                            | N                                            | 0                                      | N                                   |
| ZBED4          | 0.829599511                            | N                                            | 0                                      | N                                   |
| LINC00311      | 0.829606707                            | N                                            | 0                                      | N                                   |
| ZNF259P1       | 0.829606707                            | N                                            | 0                                      | N                                   |
| ZSWIM1         | 0.829621418                            | N                                            | 0                                      | N                                   |
| HIF1A-AS2      | 0.829644946                            | N                                            | 0                                      | N                                   |
| GAPDHP61       | 0.82977718                             | N                                            | 0                                      | N                                   |
| BCL7A          | 0.82982561                             | N                                            | 0                                      | N                                   |
| TFB2M          | 0.829828715                            | N                                            | 4                                      | N                                   |
| DNAH10         | 0.829991342                            | N                                            | 1                                      | N                                   |
| ZNF205         | 0.829991342                            | N                                            | 0                                      | N                                   |
| CCDC106        | 0.830120602                            | N                                            | 0                                      | N                                   |
| AC019226.2     | 0.83017877                             | N                                            | 0                                      | N                                   |
| COX15          | 0.83017877                             | N                                            | 0                                      | N                                   |
| IFI27L2        | 0.83017877                             | N                                            | 0                                      | N                                   |
| MATR3          | 0.83017877                             | N                                            | 0                                      | N                                   |
| ABTB2          | 0.830201795                            | N                                            | 0                                      | N                                   |
| ANKRD34A       | 0.830201795                            | N                                            | 0                                      | N                                   |
| PGAP3          | 0.830201795                            | N                                            | 1                                      | N                                   |
| RGL2           | 0.830201795                            | N                                            | 4                                      | N                                   |
| SLC6A4         | 0.830201795                            | N                                            | 23                                     | N                                   |
| UPP1           | 0.830204521                            | N                                            | 0                                      | N                                   |
| UBA5           | 0.830666639                            | N                                            | 0                                      | N                                   |
| MSN            | 0.830711474                            | N                                            | 94                                     | N                                   |
| CCIN           | 0.830794422                            | N                                            | 0                                      | N                                   |

| Gene symbols | FDR (differential expression analysis) | Differentially expressed gene? Y, Yes; N, No | Number of insulin related publications | Insulin related gene? Y, Yes; N, No |
|--------------|----------------------------------------|----------------------------------------------|----------------------------------------|-------------------------------------|
| DDA1         | 0.830794422                            | N                                            | 0                                      | N                                   |
| IGBP1P3      | 0.830794422                            | N                                            | 0                                      | N                                   |
| MTIF3        | 0.830794422                            | N                                            | 3                                      | N                                   |
| C8orf82      | 0.830926697                            | N                                            | 0                                      | N                                   |
| SCOC         | 0.830926697                            | N                                            | 0                                      | N                                   |
| DHX33        | 0.830959423                            | N                                            | 0                                      | N                                   |
| PURB         | 0.830959423                            | N                                            | 0                                      | N                                   |
| RP1          | 0.830959423                            | N                                            | 77                                     | N                                   |
| SF3A1        | 0.830959423                            | N                                            | 0                                      | N                                   |
| AC104071.1   | 0.830976772                            | N                                            | 0                                      | N                                   |
| CD84         | 0.830976772                            | N                                            | 0                                      | N                                   |
| PPM1AP1      | 0.830976772                            | N                                            | 0                                      | N                                   |
| AC245140.2   | 0.830977052                            | N                                            | 0                                      | N                                   |
| AL354836.1   | 0.830977052                            | N                                            | 0                                      | N                                   |
| AP000866.1   | 0.830977052                            | N                                            | 0                                      | N                                   |
| EARS2        | 0.830977052                            | N                                            | 0                                      | N                                   |
| PRRC2B       | 0.830977052                            | N                                            | 0                                      | N                                   |
| STX18-IT1    | 0.830977052                            | N                                            | 0                                      | N                                   |
| TMEM55A      | 0.830977052                            | N                                            | 0                                      | N                                   |
| AC112496.1   | 0.831032483                            | N                                            | 0                                      | N                                   |
| FLNC         | 0.831032483                            | N                                            | 3                                      | N                                   |
| SIX3         | 0.831032483                            | N                                            | 6                                      | N                                   |
| SLC17A9      | 0.831032483                            | N                                            | 4                                      | N                                   |
| RCHY1        | 0.831132386                            | N                                            | 1                                      | N                                   |
| EBPL         | 0.831316241                            | N                                            | 0                                      | N                                   |
| RAB40A       | 0.831343725                            | N                                            | 0                                      | N                                   |
| ALDH3A1      | 0.831356797                            | N                                            | 5                                      | N                                   |
| ARHGAP45     | 0.831356797                            | N                                            | 0                                      | N                                   |
| DHX38        | 0.831356797                            | N                                            | 0                                      | N                                   |
| FAM58A       | 0.831356797                            | N                                            | 0                                      | N                                   |
| FENDRR       | 0.831356797                            | N                                            | 0                                      | N                                   |
| GABRR2       | 0.831356797                            | N                                            | 0                                      | N                                   |
| GGA1         | 0.831356797                            | N                                            | 5                                      | N                                   |
| HELB         | 0.831356797                            | N                                            | 1                                      | N                                   |
| LINC01828    | 0.831356797                            | N                                            | 0                                      | N                                   |
| LSM3P5       | 0.831356797                            | N                                            | 0                                      | N                                   |
| MMGT1        | 0.831356797                            | N                                            | 0                                      | N                                   |
| MYH15        | 0.831356797                            | N                                            | 1                                      | N                                   |
| NF2          | 0.831356797                            | N                                            | 10                                     | N                                   |
| POLR2L       | 0.831356797                            | N                                            | 0                                      | N                                   |
| PTCD1        | 0.831356797                            | N                                            | 1                                      | N                                   |
| RGS14        | 0.831356797                            | N                                            | 0                                      | N                                   |
| SLC16A10     | 0.831356797                            | N                                            | 1                                      | N                                   |
| SMARCE1P3    | 0.831356797                            | N                                            | 0                                      | N                                   |
| SNORA65      | 0.831356797                            | N                                            | 0                                      | N                                   |
| TBX6         | 0.831356797                            | N                                            | 0                                      | N                                   |
| UTP14A       | 0.831356797                            | N                                            | 0                                      | N                                   |
| ZNF79        | 0.831356797                            | N                                            | 0                                      | N                                   |
| AC092894.1   | 0.831397511                            | N                                            | 0                                      | N                                   |
| AC010719.1   | 0.831402382                            | N                                            | 0                                      | N                                   |
| AC073389.1   | 0.831402382                            | N                                            | 0                                      | N                                   |
| ACAP3        | 0.831402382                            | N                                            | 0                                      | N                                   |
| AP000894.4   | 0.831402382                            | N                                            | 0                                      | N                                   |
| DNPH1        | 0.831402382                            | N                                            | 0                                      | N                                   |
| ENDOG        | 0.831402382                            | N                                            | 6                                      | N                                   |
| GAPDHP38     | 0.831402382                            | N                                            | 0                                      | N                                   |
| HUS1B        | 0.831402382                            | N                                            | 0                                      | N                                   |
| PRPF18       | 0.831402382                            | N                                            | 0                                      | N                                   |
| RPL12P4      | 0.831402382                            | N                                            | 0                                      | N                                   |
| C9orf84      | 0.831564177                            | N                                            | 0                                      | N                                   |
| ASAP1-IT2    | 0.831744786                            | N                                            | 0                                      | N                                   |
| RNF166       | 0.831744786                            | N                                            | 0                                      | N                                   |
| AC093297.2   | 0.831827339                            | N                                            | 0                                      | N                                   |
| KBTBD4       | 0.831867866                            | N                                            | 0                                      | N                                   |
| CENPV        | 0.831966463                            | N                                            | 0                                      | N                                   |
| RMDN1        | 0.831966463                            | N                                            | 0                                      | N                                   |

| Gene symbols | FDR (differential expression analysis) | Differentially expressed gene? Y, Yes; N, No | Number of insulin related publications | Insulin related gene? Y, Yes; N, No |
|--------------|----------------------------------------|----------------------------------------------|----------------------------------------|-------------------------------------|
| DCAF7        | 0.831991506                            | N                                            | 0                                      | N                                   |
| NDUFS8       | 0.831991506                            | N                                            | 2                                      | N                                   |
| NQO2         | 0.831991506                            | N                                            | 1                                      | N                                   |
| TIFA         | 0.831991506                            | N                                            | 0                                      | N                                   |
| TOX2         | 0.831991506                            | N                                            | 0                                      | N                                   |
| CCDC173      | 0.832091146                            | N                                            | 0                                      | N                                   |
| AL359752.1   | 0.832211248                            | N                                            | 0                                      | N                                   |
| AL451042.2   | 0.832211248                            | N                                            | 0                                      | N                                   |
| CARD14       | 0.832211248                            | N                                            | 1                                      | N                                   |
| CTBP2P8      | 0.832211248                            | N                                            | 0                                      | N                                   |
| MTND6P5      | 0.832303251                            | N                                            | 0                                      | N                                   |
| PPP1R26      | 0.832370351                            | N                                            | 0                                      | N                                   |
| DDX3Y        | 0.832375025                            | N                                            | 3                                      | N                                   |
| PMPCA        | 0.832375025                            | N                                            | 0                                      | N                                   |
| LINC00882    | 0.832563344                            | N                                            | 0                                      | N                                   |
| CARD16       | 0.832616155                            | N                                            | 0                                      | N                                   |
| ETNK1        | 0.832616155                            | N                                            | 2                                      | N                                   |
| AL158835.1   | 0.832820174                            | N                                            | 0                                      | N                                   |
| AC068768.1   | 0.832899571                            | N                                            | 0                                      | N                                   |
| ALKBH2       | 0.832899571                            | N                                            | 0                                      | N                                   |
| AP000692.1   | 0.832899571                            | N                                            | 0                                      | N                                   |
| LINC00852    | 0.832899571                            | N                                            | 0                                      | N                                   |
| MCF2L2       | 0.832899571                            | N                                            | 0                                      | N                                   |
| SCN3B        | 0.832899571                            | N                                            | 1                                      | N                                   |
| AC006529.1   | 0.832904898                            | N                                            | 0                                      | N                                   |
| AC008147.4   | 0.832904898                            | N                                            | 0                                      | N                                   |
| AC012651.1   | 0.832904898                            | N                                            | 0                                      | N                                   |
| AC138951.2   | 0.832904898                            | N                                            | 0                                      | N                                   |
| AP001267.3   | 0.832904898                            | N                                            | 0                                      | N                                   |
| DGKB         | 0.832904898                            | N                                            | 17                                     | N                                   |
| LINC00513    | 0.832904898                            | N                                            | 0                                      | N                                   |
| PAN2         | 0.832904898                            | N                                            | 2                                      | N                                   |
| PLCL2        | 0.832904898                            | N                                            | 1                                      | N                                   |
| SH3BP4       | 0.832904898                            | N                                            | 2                                      | N                                   |
| SUDS3P1      | 0.832904898                            | N                                            | 0                                      | N                                   |
| TEX26-AS1    | 0.832904898                            | N                                            | 0                                      | N                                   |
| ZNF710       | 0.832904898                            | N                                            | 0                                      | N                                   |
| AC005229.1   | 0.832935371                            | N                                            | 0                                      | N                                   |
| AC012593.1   | 0.832935371                            | N                                            | 0                                      | N                                   |
| AC024293.1   | 0.832935371                            | N                                            | 0                                      | N                                   |
| AC133552.1   | 0.832935371                            | N                                            | 0                                      | N                                   |
| AL669831.5   | 0.832935371                            | N                                            | 0                                      | N                                   |
| ARHGEF11     | 0.832935371                            | N                                            | 10                                     | N                                   |
| CRELD1       | 0.832935371                            | N                                            | 0                                      | N                                   |
| DKK2         | 0.832935371                            | N                                            | 4                                      | N                                   |
| IFI44L       | 0.832935371                            | N                                            | 0                                      | N                                   |
| IGF2BP1      | 0.832935371                            | N                                            | 70                                     | N                                   |
| KIFC3        | 0.832935371                            | N                                            | 0                                      | N                                   |
| LINC01252    | 0.832935371                            | N                                            | 0                                      | N                                   |
| PDZD7        | 0.832935371                            | N                                            | 0                                      | N                                   |
| SLC30A2      | 0.832935371                            | N                                            | 4                                      | N                                   |
| SMPD3        | 0.832935371                            | N                                            | 4                                      | N                                   |
| SRGAP3       | 0.832935371                            | N                                            | 1                                      | N                                   |
| TAS2R6P      | 0.832935371                            | N                                            | 0                                      | N                                   |
| UQCRFS1      | 0.832935371                            | N                                            | 0                                      | N                                   |
| ZADH2        | 0.832935371                            | N                                            | 0                                      | N                                   |
| EED          | 0.832937895                            | N                                            | 14                                     | N                                   |
| NPDC1        | 0.833080321                            | N                                            | 0                                      | N                                   |
| AL603750.1   | 0.833176512                            | N                                            | 0                                      | N                                   |
| MTDH         | 0.833176512                            | N                                            | 5                                      | N                                   |
| AC135352.1   | 0.833481565                            | N                                            | 0                                      | N                                   |
| KDM4D        | 0.833481565                            | N                                            | 0                                      | N                                   |
| SLC25A40     | 0.833481565                            | N                                            | 0                                      | N                                   |
| AL121672.2   | 0.833486142                            | N                                            | 0                                      | N                                   |
| CNN2P6       | 0.833486142                            | N                                            | 0                                      | N                                   |
| PDCL         | 0.83349257                             | N                                            | 1                                      | N                                   |

| Gene symbols    | FDR (differential expression analysis) | Differentially expressed gene? Y, Yes; N, No | Number of insulin related publications | Insulin related gene? Y, Yes; N, No |
|-----------------|----------------------------------------|----------------------------------------------|----------------------------------------|-------------------------------------|
| AC013731.1      | 0.833540211                            | N                                            | 0                                      | N                                   |
| DNM1P47         | 0.833540211                            | N                                            | 0                                      | N                                   |
| GCNT1P1         | 0.833540211                            | N                                            | 0                                      | N                                   |
| LTBP2           | 0.833540211                            | N                                            | 3                                      | N                                   |
| UQCRHL          | 0.833540211                            | N                                            | 0                                      | N                                   |
| AC017100.2      | 0.833727913                            | N                                            | 0                                      | N                                   |
| CARNMT1         | 0.833727913                            | N                                            | 0                                      | N                                   |
| PITPNA          | 0.833727913                            | N                                            | 0                                      | N                                   |
| GSTZ1           | 0.833806949                            | N                                            | 3                                      | N                                   |
| LINC02043       | 0.833806949                            | N                                            | 0                                      | N                                   |
| VGLL2           | 0.833944848                            | N                                            | 0                                      | N                                   |
| COX6A1          | 0.834087603                            | N                                            | 1                                      | N                                   |
| KATNBL1P6       | 0.834087603                            | N                                            | 0                                      | N                                   |
| MTO1            | 0.834109083                            | N                                            | 0                                      | N                                   |
| SIN3A           | 0.834109083                            | N                                            | 6                                      | N                                   |
| FAM204A         | 0.834127737                            | N                                            | 0                                      | N                                   |
| AC018630.2      | 0.834142679                            | N                                            | 0                                      | N                                   |
| AL590730.1      | 0.834142679                            | N                                            | 0                                      | N                                   |
| EDIL3           | 0.834142679                            | N                                            | 3                                      | N                                   |
| HSD17B14        | 0.834142679                            | N                                            | 1                                      | N                                   |
| LGALS8          | 0.834142679                            | N                                            | 2                                      | N                                   |
| AL133320.1      | 0.834280454                            | N                                            | 0                                      | N                                   |
| KIF17           | 0.834405523                            | N                                            | 1                                      | N                                   |
| 7SK             | 0.834438196                            | N                                            | 1                                      | N                                   |
| AC061975.1      | 0.834438196                            | N                                            | 0                                      | N                                   |
| ARHGEF1         | 0.834438196                            | N                                            | 45                                     | N                                   |
| CBX8            | 0.834438196                            | N                                            | 1                                      | N                                   |
| CIAPIN1P        | 0.834438196                            | N                                            | 0                                      | N                                   |
| HECTD2          | 0.834438196                            | N                                            | 0                                      | N                                   |
| HRCT1           | 0.834438196                            | N                                            | 0                                      | N                                   |
| PLS3            | 0.834438196                            | N                                            | 0                                      | N                                   |
| SYT15           | 0.834438196                            | N                                            | 1                                      | N                                   |
| LAMC3           | 0.834462847                            | N                                            | 0                                      | N                                   |
| AL049758.1      | 0.834530319                            | N                                            | 0                                      | N                                   |
| PLCD3           | 0.834530319                            | N                                            | 0                                      | N                                   |
| UFM1            | 0.834541548                            | N                                            | 4                                      | N                                   |
| NDUFA2          | 0.834640344                            | N                                            | 1                                      | N                                   |
| CREB1           | 0.834653798                            | N                                            | 101                                    | Y                                   |
| GCLC            | 0.834653798                            | N                                            | 27                                     | N                                   |
| MON1B           | 0.834653798                            | N                                            | 0                                      | N                                   |
| AC074143.1      | 0.834906512                            | N                                            | 0                                      | N                                   |
| AC110048.1      | 0.834906512                            | N                                            | 0                                      | N                                   |
| AC026362.2      | 0.834915964                            | N                                            | 0                                      | N                                   |
| P3H4            | 0.834927844                            | N                                            | 0                                      | N                                   |
| TMEM143         | 0.834927844                            | N                                            | 0                                      | N                                   |
| AC090498.1      | 0.835031912                            | N                                            | 0                                      | N                                   |
| LPP-AS2         | 0.835031912                            | N                                            | 0                                      | N                                   |
| POLRMT          | 0.835031912                            | N                                            | 2                                      | N                                   |
| TMEM134         | 0.835031912                            | N                                            | 0                                      | N                                   |
| TAF6L           | 0.835141905                            | N                                            | 0                                      | N                                   |
| AC002454.1      | 0.835621797                            | N                                            | 0                                      | N                                   |
| WDR12           | 0.835920441                            | N                                            | 0                                      | N                                   |
| GID8            | 0.836078342                            | N                                            | 0                                      | N                                   |
| CA13            | 0.836194789                            | N                                            | 2                                      | N                                   |
| YTHDF2P1        | 0.836194789                            | N                                            | 0                                      | N                                   |
| LMNTD1          | 0.83619916                             | N                                            | 0                                      | N                                   |
| RNASEK-C17orf49 | 0.83619916                             | N                                            | 0                                      | N                                   |
| EIF5P1          | 0.836375748                            | N                                            | 0                                      | N                                   |
| ACTG1P20        | 0.836428924                            | N                                            | 0                                      | N                                   |
| AL008721.2      | 0.836428924                            | N                                            | 0                                      | N                                   |
| INHBA-AS1       | 0.836428924                            | N                                            | 0                                      | N                                   |
| TMTC1           | 0.836428924                            | N                                            | 0                                      | N                                   |
| USF2            | 0.836428924                            | N                                            | 25                                     | N                                   |
| AL450313.1      | 0.836615914                            | N                                            | 0                                      | N                                   |
| RASA4           | 0.836615914                            | N                                            | 0                                      | N                                   |
| SLC43A1         | 0.836615914                            | N                                            | 3                                      | N                                   |



| Gene symbols | FDR (differential expression analysis) | Differentially expressed gene? Y, Yes; N, No | Number of insulin related publications | Insulin related gene? Y, Yes; N, No |
|--------------|----------------------------------------|----------------------------------------------|----------------------------------------|-------------------------------------|
| AC089987.1   | 0.83668072                             | N                                            | 0                                      | N                                   |
| CEP68        | 0.83668072                             | N                                            | 0                                      | N                                   |
| ITPR3        | 0.83668072                             | N                                            | 2                                      | N                                   |
| PLCB2        | 0.83668072                             | N                                            | 3                                      | N                                   |
| AC004893.2   | 0.836707256                            | N                                            | 0                                      | N                                   |
| ATPAF1       | 0.836722076                            | N                                            | 0                                      | N                                   |
| LINC00970    | 0.836722076                            | N                                            | 0                                      | N                                   |
| NSMAF        | 0.836722076                            | N                                            | 1                                      | N                                   |
| AC020688.1   | 0.836857752                            | N                                            | 0                                      | N                                   |
| AC132872.1   | 0.836857752                            | N                                            | 0                                      | N                                   |
| ALG12        | 0.83686662                             | N                                            | 0                                      | N                                   |
| TNFRSF10D    | 0.83686662                             | N                                            | 0                                      | N                                   |
| NAB1         | 0.836881476                            | N                                            | 1                                      | N                                   |
| AC034231.1   | 0.836894101                            | N                                            | 0                                      | N                                   |
| AC046158.2   | 0.837240573                            | N                                            | 0                                      | N                                   |
| AC084824.1   | 0.837240573                            | N                                            | 0                                      | N                                   |
| AC105036.3   | 0.837240573                            | N                                            | 0                                      | N                                   |
| ACAP2-IT1    | 0.837240573                            | N                                            | 0                                      | N                                   |
| AL162431.2   | 0.837240573                            | N                                            | 0                                      | N                                   |
| EIF4A1       | 0.837240573                            | N                                            | 1                                      | N                                   |
| LINC00624    | 0.837240573                            | N                                            | 0                                      | N                                   |
| MFSD3        | 0.837240573                            | N                                            | 0                                      | N                                   |
| NIPBL        | 0.837240573                            | N                                            | 1                                      | N                                   |
| NTN4         | 0.837240573                            | N                                            | 2                                      | N                                   |
| POU5F2       | 0.837240573                            | N                                            | 0                                      | N                                   |
| AL049737.1   | 0.837259579                            | N                                            | 0                                      | N                                   |
| ARHGAP8      | 0.837259579                            | N                                            | 0                                      | N                                   |
| CLCF1        | 0.837259579                            | N                                            | 0                                      | N                                   |
| ESYT1        | 0.837259579                            | N                                            | 0                                      | N                                   |
| GTF2H2C      | 0.837259579                            | N                                            | 0                                      | N                                   |
| IRF7         | 0.837259579                            | N                                            | 6                                      | N                                   |
| RPS12        | 0.837259579                            | N                                            | 0                                      | N                                   |
| SMIM26       | 0.837259579                            | N                                            | 0                                      | N                                   |
| ATP6V0A4     | 0.837412391                            | N                                            | 1                                      | N                                   |
| COPSSP1      | 0.837412391                            | N                                            | 0                                      | N                                   |
| DGCR2        | 0.837412391                            | N                                            | 2                                      | N                                   |
| DISP2        | 0.837412391                            | N                                            | 0                                      | N                                   |
| DNPEP        | 0.837412391                            | N                                            | 0                                      | N                                   |
| PRKCD        | 0.837412391                            | N                                            | 59                                     | N                                   |
| NPY1R        | 0.837446376                            | N                                            | 6                                      | N                                   |
| CEP85L       | 0.837481169                            | N                                            | 0                                      | N                                   |
| NUP214       | 0.837481169                            | N                                            | 0                                      | N                                   |
| FAM208B      | 0.837613324                            | N                                            | 0                                      | N                                   |
| FRRS1        | 0.837613324                            | N                                            | 0                                      | N                                   |
| GPM6A        | 0.837613324                            | N                                            | 3                                      | N                                   |
| AP003097.1   | 0.837699758                            | N                                            | 0                                      | N                                   |
| BACE1-AS     | 0.837699758                            | N                                            | 1                                      | N                                   |
| AC099850.2   | 0.837781041                            | N                                            | 0                                      | N                                   |
| RASA1        | 0.83812439                             | N                                            | 6                                      | N                                   |
| TNFRSF25     | 0.83812439                             | N                                            | 1                                      | N                                   |
| ASH1L-AS1    | 0.838150579                            | N                                            | 0                                      | N                                   |
| DGKG         | 0.838150579                            | N                                            | 1                                      | N                                   |
| SLC25A43     | 0.838150579                            | N                                            | 0                                      | N                                   |
| UBE2D2       | 0.838150579                            | N                                            | 1                                      | N                                   |
| ZFAT         | 0.838150579                            | N                                            | 0                                      | N                                   |
| SEPT5        | 0.838151374                            | N                                            | 1                                      | N                                   |
| AC027020.2   | 0.838151374                            | N                                            | 0                                      | N                                   |
| ADAMTSL1     | 0.838151773                            | N                                            | 0                                      | N                                   |
| AL441992.1   | 0.838151773                            | N                                            | 0                                      | N                                   |
| AL807757.1   | 0.838151773                            | N                                            | 0                                      | N                                   |
| AP001462.1   | 0.838151773                            | N                                            | 0                                      | N                                   |
| AP003733.4   | 0.838151773                            | N                                            | 0                                      | N                                   |
| RSL1D1       | 0.838151773                            | N                                            | 0                                      | N                                   |
| SP100        | 0.838151773                            | N                                            | 0                                      | N                                   |
| BATF2        | 0.838174109                            | N                                            | 0                                      | N                                   |
| LACTB2       | 0.838174109                            | N                                            | 0                                      | N                                   |

| Gene symbols | FDR (differential expression analysis) | Differentially expressed gene? Y, Yes; N, No | Number of insulin related publications | Insulin related gene? Y, Yes; N, No |
|--------------|----------------------------------------|----------------------------------------------|----------------------------------------|-------------------------------------|
| MYPN         | 0.838174109                            | N                                            | 0                                      | N                                   |
| RAB6C-AS1    | 0.838174109                            | N                                            | 0                                      | N                                   |
| AC079248.1   | 0.838206565                            | N                                            | 0                                      | N                                   |
| AC131212.4   | 0.838206565                            | N                                            | 0                                      | N                                   |
| CHST11       | 0.838206565                            | N                                            | 1                                      | N                                   |
| COL20A1      | 0.838206565                            | N                                            | 0                                      | N                                   |
| SERPINF1     | 0.838206565                            | N                                            | 6                                      | N                                   |
| Z82243.1     | 0.838206565                            | N                                            | 0                                      | N                                   |
| AC093274.1   | 0.838351968                            | N                                            | 0                                      | N                                   |
| BCL2L15      | 0.838351968                            | N                                            | 0                                      | N                                   |
| MSS51        | 0.838351968                            | N                                            | 2                                      | N                                   |
| AC027228.3   | 0.838385487                            | N                                            | 0                                      | N                                   |
| AC069360.1   | 0.838385487                            | N                                            | 0                                      | N                                   |
| AC107976.1   | 0.838385487                            | N                                            | 0                                      | N                                   |
| AL138962.1   | 0.838385487                            | N                                            | 0                                      | N                                   |
| AL355312.2   | 0.838385487                            | N                                            | 0                                      | N                                   |
| AP002967.1   | 0.838385487                            | N                                            | 0                                      | N                                   |
| C10orf35     | 0.838385487                            | N                                            | 0                                      | N                                   |
| C19orf53     | 0.838385487                            | N                                            | 0                                      | N                                   |
| CCDC86       | 0.838385487                            | N                                            | 0                                      | N                                   |
| CDK8P2       | 0.838385487                            | N                                            | 0                                      | N                                   |
| HAUS6P3      | 0.838385487                            | N                                            | 0                                      | N                                   |
| IRX3         | 0.838385487                            | N                                            | 5                                      | N                                   |
| KCTD1        | 0.838385487                            | N                                            | 1                                      | N                                   |
| LINC01695    | 0.838385487                            | N                                            | 0                                      | N                                   |
| MIR600HG     | 0.838385487                            | N                                            | 0                                      | N                                   |
| NAA25        | 0.838385487                            | N                                            | 2                                      | N                                   |
| PUDP         | 0.838385487                            | N                                            | 0                                      | N                                   |
| RASGRP2      | 0.838385487                            | N                                            | 1                                      | N                                   |
| SKIV2L       | 0.838385487                            | N                                            | 1                                      | N                                   |
| SNORA50A     | 0.838385487                            | N                                            | 0                                      | N                                   |
| SULF2        | 0.838385487                            | N                                            | 4                                      | N                                   |
| VPS25        | 0.838385487                            | N                                            | 0                                      | N                                   |
| CCNB3        | 0.838508354                            | N                                            | 0                                      | N                                   |
| GBP4         | 0.838508354                            | N                                            | 0                                      | N                                   |
| MAGOH2P      | 0.838508354                            | N                                            | 0                                      | N                                   |
| RPL3P2       | 0.838508354                            | N                                            | 0                                      | N                                   |
| AC008079.2   | 0.838551622                            | N                                            | 0                                      | N                                   |
| AC024361.1   | 0.838766871                            | N                                            | 0                                      | N                                   |
| AC012065.5   | 0.838869867                            | N                                            | 0                                      | N                                   |
| BAIAP2       | 0.838869867                            | N                                            | 38                                     | N                                   |
| HCFC2        | 0.838869867                            | N                                            | 0                                      | N                                   |
| PHF20        | 0.838869867                            | N                                            | 1                                      | N                                   |
| SIAH1        | 0.838869867                            | N                                            | 1                                      | N                                   |
| TGDS         | 0.838869867                            | N                                            | 1                                      | N                                   |
| TLL10        | 0.838869867                            | N                                            | 0                                      | N                                   |
| U73169.1     | 0.838869867                            | N                                            | 0                                      | N                                   |
| EFEMP2       | 0.838932143                            | N                                            | 1                                      | N                                   |
| KPNA3        | 0.838932143                            | N                                            | 0                                      | N                                   |
| RPL23        | 0.838932143                            | N                                            | 2                                      | N                                   |
| AK7          | 0.838974871                            | N                                            | 0                                      | N                                   |
| C19orf25     | 0.838974871                            | N                                            | 0                                      | N                                   |
| MTX1         | 0.838974871                            | N                                            | 0                                      | N                                   |
| RPL5         | 0.838974871                            | N                                            | 1                                      | N                                   |
| POU4F2       | 0.839060893                            | N                                            | 7                                      | N                                   |
| RP11-46E17.8 | 0.839060893                            | N                                            | 0                                      | N                                   |
| TMEM129      | 0.839060893                            | N                                            | 0                                      | N                                   |
| GATA2        | 0.8391138                              | N                                            | 16                                     | N                                   |
| NR2C2        | 0.839133089                            | N                                            | 7                                      | N                                   |
| CCDC81       | 0.839138186                            | N                                            | 0                                      | N                                   |
| OXCT1-AS1    | 0.839138186                            | N                                            | 0                                      | N                                   |
| LINC00964    | 0.83920146                             | N                                            | 0                                      | N                                   |
| PTPRB        | 0.83920535                             | N                                            | 1                                      | N                                   |
| AL359885.1   | 0.839265094                            | N                                            | 0                                      | N                                   |
| SEMA6A       | 0.839265094                            | N                                            | 1                                      | N                                   |
| SNORA12      | 0.839265094                            | N                                            | 0                                      | N                                   |

| Gene symbols | FDR (differential expression analysis) | Differentially expressed gene? Y, Yes; N, No | Number of insulin related publications | Insulin related gene? Y, Yes; N, No |
|--------------|----------------------------------------|----------------------------------------------|----------------------------------------|-------------------------------------|
| RPL24P4      | 0.83931979                             | N                                            | 0                                      | N                                   |
| AL359636.1   | 0.839503906                            | N                                            | 0                                      | N                                   |
| PPIL4        | 0.839530247                            | N                                            | 0                                      | N                                   |
| AL353608.3   | 0.839566266                            | N                                            | 0                                      | N                                   |
| BTN2A3P      | 0.839566266                            | N                                            | 0                                      | N                                   |
| AL118511.1   | 0.839574061                            | N                                            | 0                                      | N                                   |
| TAS2R46      | 0.839574061                            | N                                            | 0                                      | N                                   |
| OCEL1        | 0.8395933                              | N                                            | 0                                      | N                                   |
| AC016168.3   | 0.839700861                            | N                                            | 0                                      | N                                   |
| AC133552.2   | 0.839700861                            | N                                            | 0                                      | N                                   |
| AKR7A3       | 0.839700861                            | N                                            | 0                                      | N                                   |
| AL354920.1   | 0.839700861                            | N                                            | 0                                      | N                                   |
| ANKRD44-IT1  | 0.839700861                            | N                                            | 0                                      | N                                   |
| ARHGAP28     | 0.839700861                            | N                                            | 0                                      | N                                   |
| HERC2P2      | 0.839700861                            | N                                            | 0                                      | N                                   |
| LOXL4        | 0.839700861                            | N                                            | 0                                      | N                                   |
| POLB         | 0.839700861                            | N                                            | 1                                      | N                                   |
| RPS4XP17     | 0.839700861                            | N                                            | 0                                      | N                                   |
| ZSWIM3       | 0.839700861                            | N                                            | 0                                      | N                                   |
| PTOV1-AS1    | 0.839842639                            | N                                            | 0                                      | N                                   |
| AC005921.3   | 0.839846154                            | N                                            | 0                                      | N                                   |
| AC011453.1   | 0.839846154                            | N                                            | 0                                      | N                                   |
| AC126389.1   | 0.839846154                            | N                                            | 0                                      | N                                   |
| ADD3         | 0.839846154                            | N                                            | 0                                      | N                                   |
| CYB5R4       | 0.839846154                            | N                                            | 1                                      | N                                   |
| FAM129A      | 0.839846154                            | N                                            | 2                                      | N                                   |
| HOXA10       | 0.839846154                            | N                                            | 35                                     | N                                   |
| MRFAP1       | 0.839846154                            | N                                            | 0                                      | N                                   |
| NDUFB4P12    | 0.839846154                            | N                                            | 0                                      | N                                   |
| PAPOLA       | 0.839846154                            | N                                            | 2                                      | N                                   |
| PI4KAP2      | 0.839846154                            | N                                            | 0                                      | N                                   |
| SHC3         | 0.839846154                            | N                                            | 0                                      | N                                   |
| SLC25A30     | 0.839846154                            | N                                            | 0                                      | N                                   |
| SMC1B        | 0.839846154                            | N                                            | 0                                      | N                                   |
| TIMM10B      | 0.839846154                            | N                                            | 0                                      | N                                   |
| TMED8        | 0.839846154                            | N                                            | 0                                      | N                                   |
| ZNF143       | 0.839846154                            | N                                            | 3                                      | N                                   |
| AC021054.1   | 0.839884902                            | N                                            | 0                                      | N                                   |
| AC022211.1   | 0.839884902                            | N                                            | 0                                      | N                                   |
| AC104027.1   | 0.839940919                            | N                                            | 0                                      | N                                   |
| SSPO         | 0.839940919                            | N                                            | 0                                      | N                                   |
| AC060234.2   | 0.839947631                            | N                                            | 0                                      | N                                   |
| AC097523.2   | 0.839947631                            | N                                            | 0                                      | N                                   |
| AP000944.1   | 0.839947631                            | N                                            | 0                                      | N                                   |
| HNRNPA3      | 0.839947631                            | N                                            | 0                                      | N                                   |
| ANKS6        | 0.84005239                             | N                                            | 0                                      | N                                   |
| ATRAID       | 0.84005239                             | N                                            | 0                                      | N                                   |
| FBXO44       | 0.84005239                             | N                                            | 0                                      | N                                   |
| AC012254.2   | 0.840443048                            | N                                            | 0                                      | N                                   |
| AC022079.1   | 0.840443048                            | N                                            | 0                                      | N                                   |
| AF131216.4   | 0.840443048                            | N                                            | 0                                      | N                                   |
| APOL3        | 0.840443048                            | N                                            | 1                                      | N                                   |
| CREB3L1      | 0.840443048                            | N                                            | 3                                      | N                                   |
| EDNRB        | 0.840443048                            | N                                            | 44                                     | N                                   |
| LEAP2        | 0.840443048                            | N                                            | 2                                      | N                                   |
| MATN1        | 0.840443048                            | N                                            | 5                                      | N                                   |
| NFYC-AS1     | 0.840443048                            | N                                            | 0                                      | N                                   |
| PLD1         | 0.840443048                            | N                                            | 37                                     | N                                   |
| RPL18        | 0.840443048                            | N                                            | 0                                      | N                                   |
| SLC25A25-AS1 | 0.840443048                            | N                                            | 0                                      | N                                   |
| AC073055.1   | 0.84047394                             | N                                            | 0                                      | N                                   |
| AL117378.1   | 0.84047394                             | N                                            | 0                                      | N                                   |
| PCSK5        | 0.84047394                             | N                                            | 2                                      | N                                   |
| RPS3A        | 0.84047394                             | N                                            | 0                                      | N                                   |
| TSPEAR-AS2   | 0.84047394                             | N                                            | 0                                      | N                                   |
| WNT4         | 0.84047394                             | N                                            | 28                                     | N                                   |

| Gene symbols | FDR (differential expression analysis) | Differentially expressed gene? Y, Yes; N, No | Number of insulin related publications | Insulin related gene? Y, Yes; N, No |
|--------------|----------------------------------------|----------------------------------------------|----------------------------------------|-------------------------------------|
| AC005072.1   | 0.84047681                             | N                                            | 0                                      | N                                   |
| AC009948.3   | 0.84047681                             | N                                            | 0                                      | N                                   |
| AC068620.2   | 0.84047681                             | N                                            | 0                                      | N                                   |
| AC087386.1   | 0.84047681                             | N                                            | 0                                      | N                                   |
| AC108114.1   | 0.84047681                             | N                                            | 0                                      | N                                   |
| AC114876.1   | 0.84047681                             | N                                            | 0                                      | N                                   |
| AC243967.3   | 0.84047681                             | N                                            | 0                                      | N                                   |
| AL359273.1   | 0.84047681                             | N                                            | 0                                      | N                                   |
| ASB6         | 0.84047681                             | N                                            | 2                                      | N                                   |
| CCDC121      | 0.84047681                             | N                                            | 0                                      | N                                   |
| CCNO         | 0.84047681                             | N                                            | 0                                      | N                                   |
| CHM          | 0.84047681                             | N                                            | 27                                     | N                                   |
| DOCK3        | 0.84047681                             | N                                            | 1                                      | N                                   |
| EXOC8        | 0.84047681                             | N                                            | 1                                      | N                                   |
| FRMD4B       | 0.84047681                             | N                                            | 2                                      | N                                   |
| NACC2        | 0.84047681                             | N                                            | 0                                      | N                                   |
| PSMD11       | 0.84047681                             | N                                            | 1                                      | N                                   |
| RPL21P99     | 0.84047681                             | N                                            | 0                                      | N                                   |
| RUNDC1       | 0.84047681                             | N                                            | 0                                      | N                                   |
| TEX15        | 0.84047681                             | N                                            | 0                                      | N                                   |
| AC008764.8   | 0.840517262                            | N                                            | 0                                      | N                                   |
| AL157823.1   | 0.840517262                            | N                                            | 0                                      | N                                   |
| DNAH5        | 0.840517262                            | N                                            | 1                                      | N                                   |
| FAM212B-AS1  | 0.840517262                            | N                                            | 0                                      | N                                   |
| FP565260.7   | 0.840517262                            | N                                            | 0                                      | N                                   |
| LINC01254    | 0.840517262                            | N                                            | 0                                      | N                                   |
| LZTS2        | 0.840517262                            | N                                            | 0                                      | N                                   |
| MPRIP        | 0.840517262                            | N                                            | 0                                      | N                                   |
| SDAD1P1      | 0.840517262                            | N                                            | 0                                      | N                                   |
| TFCP2        | 0.840517262                            | N                                            | 0                                      | N                                   |
| VSTM5        | 0.840517262                            | N                                            | 0                                      | N                                   |
| ZNF738       | 0.840517262                            | N                                            | 0                                      | N                                   |
| EMILIN3      | 0.840764908                            | N                                            | 0                                      | N                                   |
| UBE2B        | 0.840764908                            | N                                            | 0                                      | N                                   |
| ABHD17A      | 0.840785709                            | N                                            | 0                                      | N                                   |
| CDR2         | 0.840785709                            | N                                            | 1                                      | N                                   |
| DLK2         | 0.840785709                            | N                                            | 2                                      | N                                   |
| EMX2         | 0.840785709                            | N                                            | 3                                      | N                                   |
| HSPA8P15     | 0.840785709                            | N                                            | 0                                      | N                                   |
| MIF-AS1      | 0.840785709                            | N                                            | 0                                      | N                                   |
| NAALADL1     | 0.840785709                            | N                                            | 0                                      | N                                   |
| C11orf63     | 0.840835941                            | N                                            | 0                                      | N                                   |
| RAG1         | 0.840849324                            | N                                            | 34                                     | N                                   |
| FRMD8        | 0.841594246                            | N                                            | 0                                      | N                                   |
| PAK6         | 0.841594246                            | N                                            | 1                                      | N                                   |
| PPFIA3       | 0.841594246                            | N                                            | 0                                      | N                                   |
| ZBTB11-AS1   | 0.841594246                            | N                                            | 0                                      | N                                   |
| AC010395.2   | 0.841602432                            | N                                            | 0                                      | N                                   |
| PEX11B       | 0.841602432                            | N                                            | 0                                      | N                                   |
| ABHD17C      | 0.841668459                            | N                                            | 0                                      | N                                   |
| AC005972.1   | 0.841668459                            | N                                            | 0                                      | N                                   |
| AC027279.1   | 0.841668459                            | N                                            | 0                                      | N                                   |
| AC040162.3   | 0.841668459                            | N                                            | 0                                      | N                                   |
| AC087241.4   | 0.841668459                            | N                                            | 0                                      | N                                   |
| AL078644.1   | 0.841668459                            | N                                            | 0                                      | N                                   |
| AL138899.1   | 0.841668459                            | N                                            | 0                                      | N                                   |
| ANKRD26      | 0.841668459                            | N                                            | 5                                      | N                                   |
| CCDC66       | 0.841668459                            | N                                            | 0                                      | N                                   |
| CDKN1A       | 0.841668459                            | N                                            | 161                                    | Y                                   |
| DCAF11       | 0.841668459                            | N                                            | 0                                      | N                                   |
| ETFB         | 0.841668459                            | N                                            | 2                                      | N                                   |
| FAM171A2     | 0.841668459                            | N                                            | 0                                      | N                                   |
| GFAP         | 0.841668459                            | N                                            | 217                                    | Y                                   |
| KCNH1        | 0.841668459                            | N                                            | 2                                      | N                                   |
| KIAA0753     | 0.841668459                            | N                                            | 0                                      | N                                   |
| LILRB3       | 0.841668459                            | N                                            | 1                                      | N                                   |

| Gene symbols  | FDR (differential expression analysis) | Differentially expressed gene? Y, Yes; N, No | Number of insulin related publications | Insulin related gene? Y, Yes; N, No |
|---------------|----------------------------------------|----------------------------------------------|----------------------------------------|-------------------------------------|
| PACRGL        | 0.841668459                            | N                                            | 0                                      | N                                   |
| PPATP1        | 0.841668459                            | N                                            | 0                                      | N                                   |
| RN7SL744P     | 0.841668459                            | N                                            | 0                                      | N                                   |
| RP11-392E22.9 | 0.841668459                            | N                                            | 0                                      | N                                   |
| RPL3          | 0.841668459                            | N                                            | 1                                      | N                                   |
| TASP1         | 0.841668459                            | N                                            | 0                                      | N                                   |
| TBC1D10A      | 0.841668459                            | N                                            | 2                                      | N                                   |
| TCTE3         | 0.841668459                            | N                                            | 0                                      | N                                   |
| TMEM132E      | 0.841668459                            | N                                            | 0                                      | N                                   |
| TMEM94        | 0.841668459                            | N                                            | 0                                      | N                                   |
| TSGA10        | 0.841668459                            | N                                            | 0                                      | N                                   |
| NECAB1        | 0.841714487                            | N                                            | 0                                      | N                                   |
| NNT           | 0.841714487                            | N                                            | 43                                     | N                                   |
| RCOR1         | 0.841714487                            | N                                            | 1                                      | N                                   |
| AL392023.2    | 0.841917559                            | N                                            | 0                                      | N                                   |
| RPL10A        | 0.84212214                             | N                                            | 2                                      | N                                   |
| PTK6          | 0.842208101                            | N                                            | 6                                      | N                                   |
| PLBD1         | 0.842231959                            | N                                            | 0                                      | N                                   |
| AC091982.4    | 0.842574839                            | N                                            | 0                                      | N                                   |
| AFAP1L1       | 0.842675377                            | N                                            | 0                                      | N                                   |
| ARL17B        | 0.842694266                            | N                                            | 0                                      | N                                   |
| MEIG1         | 0.842694266                            | N                                            | 0                                      | N                                   |
| SPCS3         | 0.842752224                            | N                                            | 0                                      | N                                   |
| AL049844.1    | 0.842765084                            | N                                            | 0                                      | N                                   |
| AC078795.1    | 0.842783024                            | N                                            | 0                                      | N                                   |
| AC092384.2    | 0.842783024                            | N                                            | 0                                      | N                                   |
| AC130324.3    | 0.842783024                            | N                                            | 0                                      | N                                   |
| CARD9         | 0.842783024                            | N                                            | 3                                      | N                                   |
| EML1          | 0.842783024                            | N                                            | 0                                      | N                                   |
| FAM201A       | 0.842783024                            | N                                            | 0                                      | N                                   |
| LINC02391     | 0.842783024                            | N                                            | 0                                      | N                                   |
| LOXL3         | 0.842783024                            | N                                            | 0                                      | N                                   |
| NALCN         | 0.842783024                            | N                                            | 4                                      | N                                   |
| SHCBP1L       | 0.842783024                            | N                                            | 0                                      | N                                   |
| SLC44A5       | 0.842783024                            | N                                            | 0                                      | N                                   |
| SSFA2         | 0.842783024                            | N                                            | 0                                      | N                                   |
| TET1P1        | 0.842783024                            | N                                            | 0                                      | N                                   |
| TNNI1         | 0.842783024                            | N                                            | 3                                      | N                                   |
| VIL1          | 0.842783024                            | N                                            | 1                                      | N                                   |
| ZFPL1         | 0.842783024                            | N                                            | 0                                      | N                                   |
| UNG           | 0.842810328                            | N                                            | 7                                      | N                                   |
| AL355482.1    | 0.842888128                            | N                                            | 0                                      | N                                   |
| CALM1         | 0.842959872                            | N                                            | 5                                      | N                                   |
| AP001284.1    | 0.843071182                            | N                                            | 0                                      | N                                   |
| CLPP          | 0.843071182                            | N                                            | 8                                      | N                                   |
| CXCL12        | 0.843071182                            | N                                            | 150                                    | Y                                   |
| FAM53A        | 0.843071182                            | N                                            | 0                                      | N                                   |
| MAML1         | 0.843071182                            | N                                            | 4                                      | N                                   |
| FBXO6         | 0.843202002                            | N                                            | 0                                      | N                                   |
| SSR4          | 0.843202002                            | N                                            | 1                                      | N                                   |
| USP14         | 0.843333877                            | N                                            | 1                                      | N                                   |
| RASSF4        | 0.84333727                             | N                                            | 0                                      | N                                   |
| AC022306.2    | 0.843409402                            | N                                            | 0                                      | N                                   |
| EFHC1         | 0.843409402                            | N                                            | 2                                      | N                                   |
| LSM1          | 0.843409402                            | N                                            | 2                                      | N                                   |
| PHKG1         | 0.843409402                            | N                                            | 1                                      | N                                   |
| RN7SKP97      | 0.843409402                            | N                                            | 0                                      | N                                   |
| SMARCE1       | 0.843409402                            | N                                            | 0                                      | N                                   |
| TBX18         | 0.843409402                            | N                                            | 11                                     | N                                   |
| DCTD          | 0.843686118                            | N                                            | 0                                      | N                                   |
| TMEM173       | 0.843761561                            | N                                            | 4                                      | N                                   |
| LINC02245     | 0.843841686                            | N                                            | 0                                      | N                                   |
| GPR68         | 0.843926958                            | N                                            | 5                                      | N                                   |
| AC005632.2    | 0.843992479                            | N                                            | 0                                      | N                                   |
| AC079341.1    | 0.843992479                            | N                                            | 0                                      | N                                   |
| AC109361.1    | 0.843992479                            | N                                            | 0                                      | N                                   |

| Gene symbols  | FDR (differential expression analysis) | Differentially expressed gene? Y, Yes; N, No | Number of insulin related publications | Insulin related gene? Y, Yes; N, No |
|---------------|----------------------------------------|----------------------------------------------|----------------------------------------|-------------------------------------|
| CLEC4M        | 0.843992479                            | N                                            | 0                                      | N                                   |
| CNOT11        | 0.843992479                            | N                                            | 0                                      | N                                   |
| EOMES         | 0.843992479                            | N                                            | 7                                      | N                                   |
| FAM126A       | 0.843992479                            | N                                            | 0                                      | N                                   |
| ZC3H4         | 0.843992479                            | N                                            | 0                                      | N                                   |
| AC105285.1    | 0.844004394                            | N                                            | 0                                      | N                                   |
| ABCE1         | 0.844312896                            | N                                            | 1                                      | N                                   |
| AC104964.2    | 0.844312896                            | N                                            | 0                                      | N                                   |
| AL008729.1    | 0.844312896                            | N                                            | 0                                      | N                                   |
| AL357520.1    | 0.844312896                            | N                                            | 0                                      | N                                   |
| DNAJB7        | 0.844312896                            | N                                            | 0                                      | N                                   |
| DZIP1         | 0.844312896                            | N                                            | 0                                      | N                                   |
| P2RX4         | 0.844312896                            | N                                            | 2                                      | N                                   |
| SLC39A13      | 0.844312896                            | N                                            | 1                                      | N                                   |
| AC002366.1    | 0.844372303                            | N                                            | 0                                      | N                                   |
| COMMD3-BMI1   | 0.844372303                            | N                                            | 0                                      | N                                   |
| NARFL         | 0.844372303                            | N                                            | 0                                      | N                                   |
| SIRT3         | 0.844372303                            | N                                            | 104                                    | Y                                   |
| AC018647.2    | 0.844419917                            | N                                            | 0                                      | N                                   |
| AC019109.1    | 0.844419917                            | N                                            | 0                                      | N                                   |
| ANKLE2        | 0.844419917                            | N                                            | 0                                      | N                                   |
| MAP10         | 0.844419917                            | N                                            | 0                                      | N                                   |
| MZF1          | 0.844419917                            | N                                            | 2                                      | N                                   |
| OPRK1         | 0.844419917                            | N                                            | 0                                      | N                                   |
| ZAP70         | 0.844419917                            | N                                            | 11                                     | N                                   |
| AC009088.4    | 0.844446103                            | N                                            | 0                                      | N                                   |
| PHBP19        | 0.844446103                            | N                                            | 0                                      | N                                   |
| VPS37B        | 0.844446103                            | N                                            | 0                                      | N                                   |
| PCDH12        | 0.844620911                            | N                                            | 0                                      | N                                   |
| APEX2         | 0.844694263                            | N                                            | 0                                      | N                                   |
| APOBEC3F      | 0.844694263                            | N                                            | 0                                      | N                                   |
| EXOSC3P1      | 0.844694263                            | N                                            | 0                                      | N                                   |
| SLC24A3       | 0.844694263                            | N                                            | 0                                      | N                                   |
| PARVB         | 0.845010451                            | N                                            | 2                                      | N                                   |
| PLXDC1        | 0.845052303                            | N                                            | 0                                      | N                                   |
| TMEM156       | 0.845058844                            | N                                            | 0                                      | N                                   |
| PRKX          | 0.845126269                            | N                                            | 0                                      | N                                   |
| CD274         | 0.845143282                            | N                                            | 24                                     | N                                   |
| TTC27         | 0.845143282                            | N                                            | 0                                      | N                                   |
| WIZ           | 0.845143282                            | N                                            | 0                                      | N                                   |
| PTPMT1        | 0.845152252                            | N                                            | 5                                      | N                                   |
| C5orf17       | 0.845360595                            | N                                            | 0                                      | N                                   |
| PRMT3         | 0.845360595                            | N                                            | 1                                      | N                                   |
| SERGEF        | 0.845360595                            | N                                            | 0                                      | N                                   |
| MRPL3P1       | 0.845487735                            | N                                            | 0                                      | N                                   |
| RNF7P1        | 0.845487735                            | N                                            | 0                                      | N                                   |
| SFXN5         | 0.845487735                            | N                                            | 1                                      | N                                   |
| WDFY2         | 0.845521515                            | N                                            | 1                                      | N                                   |
| DDX42         | 0.845544982                            | N                                            | 1                                      | N                                   |
| LIFR-AS1      | 0.845544982                            | N                                            | 0                                      | N                                   |
| LTBP3         | 0.845544982                            | N                                            | 0                                      | N                                   |
| PITHD1        | 0.845544982                            | N                                            | 0                                      | N                                   |
| RP11-193H22.2 | 0.845544982                            | N                                            | 0                                      | N                                   |
| WWP2          | 0.845612264                            | N                                            | 1                                      | N                                   |
| SMAD5         | 0.84561288                             | N                                            | 9                                      | N                                   |
| AC022415.1    | 0.845634934                            | N                                            | 0                                      | N                                   |
| AC102945.2    | 0.845634934                            | N                                            | 0                                      | N                                   |
| ATP6V0C       | 0.845634934                            | N                                            | 0                                      | N                                   |
| CRX           | 0.845634934                            | N                                            | 3                                      | N                                   |
| CRY1          | 0.845634934                            | N                                            | 48                                     | N                                   |
| MEI1          | 0.845634934                            | N                                            | 0                                      | N                                   |
| NPHP4         | 0.845634934                            | N                                            | 0                                      | N                                   |
| PMEL          | 0.845634934                            | N                                            | 2                                      | N                                   |
| RAB24         | 0.845634934                            | N                                            | 0                                      | N                                   |
| SSB           | 0.845634934                            | N                                            | 57                                     | N                                   |
| TIGD7         | 0.845634934                            | N                                            | 1                                      | N                                   |

| Gene symbols | FDR (differential expression analysis) | Differentially expressed gene? Y, Yes; N, No | Number of insulin related publications | Insulin related gene? Y, Yes; N, No |
|--------------|----------------------------------------|----------------------------------------------|----------------------------------------|-------------------------------------|
| AC004148.2   | 0.845647721                            | N                                            | 0                                      | N                                   |
| AC027097.1   | 0.845647721                            | N                                            | 0                                      | N                                   |
| AC121247.1   | 0.845647721                            | N                                            | 0                                      | N                                   |
| AC131212.2   | 0.845647721                            | N                                            | 0                                      | N                                   |
| AP000357.1   | 0.845647721                            | N                                            | 0                                      | N                                   |
| APEH         | 0.845647721                            | N                                            | 0                                      | N                                   |
| AZIN1        | 0.845647721                            | N                                            | 2                                      | N                                   |
| CPEB1        | 0.845647721                            | N                                            | 3                                      | N                                   |
| DHRS7B       | 0.845647721                            | N                                            | 0                                      | N                                   |
| DPP7         | 0.845647721                            | N                                            | 0                                      | N                                   |
| FGF22        | 0.845647721                            | N                                            | 4                                      | N                                   |
| HIGD2A       | 0.845647721                            | N                                            | 0                                      | N                                   |
| HSPE1-MOB4   | 0.845647721                            | N                                            | 0                                      | N                                   |
| LINC01119    | 0.845647721                            | N                                            | 0                                      | N                                   |
| NEUROD2      | 0.845647721                            | N                                            | 2                                      | N                                   |
| NSD1         | 0.845647721                            | N                                            | 8                                      | N                                   |
| PABPC1       | 0.845647721                            | N                                            | 1                                      | N                                   |
| PLD4         | 0.845647721                            | N                                            | 0                                      | N                                   |
| PLEKHG5      | 0.845647721                            | N                                            | 0                                      | N                                   |
| PRDX3        | 0.845647721                            | N                                            | 10                                     | N                                   |
| PWWP2B       | 0.845647721                            | N                                            | 0                                      | N                                   |
| RINL         | 0.845647721                            | N                                            | 0                                      | N                                   |
| SIGLEC8      | 0.845647721                            | N                                            | 0                                      | N                                   |
| SLAIN2       | 0.845647721                            | N                                            | 0                                      | N                                   |
| SLC44A1      | 0.845647721                            | N                                            | 0                                      | N                                   |
| SMG5         | 0.845647721                            | N                                            | 0                                      | N                                   |
| TAPT1        | 0.845647721                            | N                                            | 0                                      | N                                   |
| TPM3P8       | 0.845647721                            | N                                            | 0                                      | N                                   |
| ZFAND1       | 0.845647721                            | N                                            | 0                                      | N                                   |
| AL358472.3   | 0.845660118                            | N                                            | 0                                      | N                                   |
| AC007405.1   | 0.845812606                            | N                                            | 0                                      | N                                   |
| KIAA1522     | 0.845812606                            | N                                            | 0                                      | N                                   |
| PCSK6-AS1    | 0.845812606                            | N                                            | 0                                      | N                                   |
| RLIMP1       | 0.84588105                             | N                                            | 0                                      | N                                   |
| RPL37AP8     | 0.845923991                            | N                                            | 0                                      | N                                   |
| AC020661.5   | 0.84605356                             | N                                            | 0                                      | N                                   |
| AC092979.1   | 0.846127144                            | N                                            | 0                                      | N                                   |
| RIN1         | 0.846127144                            | N                                            | 3                                      | N                                   |
| SERHL2       | 0.846127144                            | N                                            | 0                                      | N                                   |
| THAP5        | 0.846127144                            | N                                            | 0                                      | N                                   |
| TMEM104      | 0.846127144                            | N                                            | 0                                      | N                                   |
| AP000253.1   | 0.84613763                             | N                                            | 0                                      | N                                   |
| ATP5I        | 0.84613763                             | N                                            | 1                                      | N                                   |
| SLC38A11     | 0.84613763                             | N                                            | 0                                      | N                                   |
| AC010132.2   | 0.846169183                            | N                                            | 0                                      | N                                   |
| ADGRL1       | 0.846169183                            | N                                            | 0                                      | N                                   |
| CARMN        | 0.846169183                            | N                                            | 0                                      | N                                   |
| LINC02154    | 0.846169183                            | N                                            | 0                                      | N                                   |
| MBNL2        | 0.846169183                            | N                                            | 3                                      | N                                   |
| RFXANK       | 0.846169183                            | N                                            | 0                                      | N                                   |
| TRIM23       | 0.846169183                            | N                                            | 0                                      | N                                   |
| COX7A2P2     | 0.846187949                            | N                                            | 0                                      | N                                   |
| AC005532.2   | 0.846219968                            | N                                            | 0                                      | N                                   |
| AC034154.1   | 0.846219968                            | N                                            | 0                                      | N                                   |
| AL359881.3   | 0.846219968                            | N                                            | 0                                      | N                                   |
| AL512310.12  | 0.846219968                            | N                                            | 0                                      | N                                   |
| C2CD6        | 0.846219968                            | N                                            | 0                                      | N                                   |
| CKLF-CMTM1   | 0.846219968                            | N                                            | 0                                      | N                                   |
| CNOT1        | 0.846219968                            | N                                            | 4                                      | N                                   |
| FECH         | 0.846219968                            | N                                            | 0                                      | N                                   |
| LEO1         | 0.846219968                            | N                                            | 0                                      | N                                   |
| MVK          | 0.846219968                            | N                                            | 3                                      | N                                   |
| ZNF439       | 0.846219968                            | N                                            | 0                                      | N                                   |
| PIAS4        | 0.846359699                            | N                                            | 2                                      | N                                   |
| BARX1-AS1    | 0.846438041                            | N                                            | 0                                      | N                                   |
| AC036214.2   | 0.846596849                            | N                                            | 0                                      | N                                   |

| Gene symbols | FDR (differential expression analysis) | Differentially expressed gene? Y, Yes; N, No | Number of insulin related publications | Insulin related gene? Y, Yes; N, No |
|--------------|----------------------------------------|----------------------------------------------|----------------------------------------|-------------------------------------|
| AC093225.1   | 0.846596849                            | N                                            | 0                                      | N                                   |
| ACVR1C       | 0.846596849                            | N                                            | 12                                     | N                                   |
| AL138725.1   | 0.846596849                            | N                                            | 0                                      | N                                   |
| AL627223.1   | 0.846596849                            | N                                            | 0                                      | N                                   |
| DNMBP        | 0.846596849                            | N                                            | 0                                      | N                                   |
| ERGIC1       | 0.846596849                            | N                                            | 0                                      | N                                   |
| FAM111B      | 0.846596849                            | N                                            | 0                                      | N                                   |
| GPR55        | 0.846596849                            | N                                            | 24                                     | N                                   |
| NFIX         | 0.846596849                            | N                                            | 1                                      | N                                   |
| NSUN5        | 0.846596849                            | N                                            | 0                                      | N                                   |
| PPL          | 0.846596849                            | N                                            | 28                                     | N                                   |
| RN7SKP175    | 0.846596849                            | N                                            | 0                                      | N                                   |
| RPS19P1      | 0.846596849                            | N                                            | 0                                      | N                                   |
| SH3RF2       | 0.846596849                            | N                                            | 0                                      | N                                   |
| SLITRK2      | 0.846596849                            | N                                            | 0                                      | N                                   |
| TRAM2-AS1    | 0.846596849                            | N                                            | 0                                      | N                                   |
| TLL9         | 0.846596849                            | N                                            | 0                                      | N                                   |
| UBE3D        | 0.846596849                            | N                                            | 0                                      | N                                   |
| AC092117.2   | 0.84663189                             | N                                            | 0                                      | N                                   |
| MTCO1P25     | 0.84663189                             | N                                            | 0                                      | N                                   |
| ANKRD52      | 0.846701821                            | N                                            | 0                                      | N                                   |
| AP001330.5   | 0.846701821                            | N                                            | 0                                      | N                                   |
| CC2D1A       | 0.846701821                            | N                                            | 1                                      | N                                   |
| CDK20        | 0.846701821                            | N                                            | 0                                      | N                                   |
| FTCDNL1      | 0.846701821                            | N                                            | 0                                      | N                                   |
| GPALPP1      | 0.846701821                            | N                                            | 0                                      | N                                   |
| PRKAB1       | 0.846701821                            | N                                            | 13                                     | N                                   |
| SERPINB6     | 0.846701821                            | N                                            | 0                                      | N                                   |
| SLC15A2      | 0.846701821                            | N                                            | 2                                      | N                                   |
| TRIM65       | 0.846701821                            | N                                            | 0                                      | N                                   |
| TSSC4        | 0.846701821                            | N                                            | 0                                      | N                                   |
| ZNF428       | 0.846701821                            | N                                            | 0                                      | N                                   |
| AC015878.2   | 0.846808131                            | N                                            | 0                                      | N                                   |
| AC107980.1   | 0.846808131                            | N                                            | 0                                      | N                                   |
| LRRC39       | 0.846808131                            | N                                            | 0                                      | N                                   |
| Metazoa_SRP  | 0.846808131                            | N                                            | 0                                      | N                                   |
| SNORA79B     | 0.846808131                            | N                                            | 0                                      | N                                   |
| TRIM39       | 0.846808131                            | N                                            | 0                                      | N                                   |
| FOXC2        | 0.84681089                             | N                                            | 32                                     | N                                   |
| LINC01003    | 0.84681089                             | N                                            | 0                                      | N                                   |
| MYL6P1       | 0.84681089                             | N                                            | 0                                      | N                                   |
| TMC2         | 0.84681089                             | N                                            | 0                                      | N                                   |
| AC007620.3   | 0.84706025                             | N                                            | 0                                      | N                                   |
| AC067942.2   | 0.84707425                             | N                                            | 0                                      | N                                   |
| AC093802.1   | 0.84707425                             | N                                            | 0                                      | N                                   |
| ARL8A        | 0.847159208                            | N                                            | 0                                      | N                                   |
| BHLHE41      | 0.847290879                            | N                                            | 2                                      | N                                   |
| SLC26A4-AS1  | 0.847290879                            | N                                            | 0                                      | N                                   |
| AL360093.1   | 0.847351134                            | N                                            | 0                                      | N                                   |
| CRYAB        | 0.847351134                            | N                                            | 10                                     | N                                   |
| CTSL         | 0.847351134                            | N                                            | 30                                     | N                                   |
| FAM212A      | 0.847351134                            | N                                            | 0                                      | N                                   |
| HOMER2       | 0.847351134                            | N                                            | 0                                      | N                                   |
| NLGN4Y       | 0.847351134                            | N                                            | 1                                      | N                                   |
| POFUT1       | 0.847351134                            | N                                            | 0                                      | N                                   |
| POLR1C       | 0.847351134                            | N                                            | 0                                      | N                                   |
| RIBC1        | 0.847351134                            | N                                            | 0                                      | N                                   |
| TMEM108      | 0.847351134                            | N                                            | 0                                      | N                                   |
| XYLB         | 0.847351134                            | N                                            | 1                                      | N                                   |
| ZNF880       | 0.847351134                            | N                                            | 0                                      | N                                   |
| BEST3        | 0.847545844                            | N                                            | 0                                      | N                                   |
| HEXDC        | 0.847545844                            | N                                            | 0                                      | N                                   |
| ACTN4P1      | 0.847591033                            | N                                            | 0                                      | N                                   |
| CTNNBIP1     | 0.847591033                            | N                                            | 0                                      | N                                   |
| ETFBKMT      | 0.847591033                            | N                                            | 0                                      | N                                   |
| FRMPD3       | 0.847591033                            | N                                            | 0                                      | N                                   |



| Gene symbols | FDR (differential expression analysis) | Differentially expressed gene? Y, Yes; N, No | Number of insulin related publications | Insulin related gene? Y, Yes; N, No |
|--------------|----------------------------------------|----------------------------------------------|----------------------------------------|-------------------------------------|
| GALK1        | 0.847591033                            | N                                            | 2                                      | N                                   |
| LSM12        | 0.847591033                            | N                                            | 0                                      | N                                   |
| SLC4A2       | 0.847591033                            | N                                            | 1                                      | N                                   |
| SPAG9        | 0.847591033                            | N                                            | 0                                      | N                                   |
| Z98048.1     | 0.847591033                            | N                                            | 0                                      | N                                   |
| GNPTG        | 0.847646585                            | N                                            | 1                                      | N                                   |
| THNSL2       | 0.847646585                            | N                                            | 2                                      | N                                   |
| AC138207.6   | 0.847764176                            | N                                            | 0                                      | N                                   |
| LITD1        | 0.847764176                            | N                                            | 0                                      | N                                   |
| LINC00950    | 0.847764176                            | N                                            | 0                                      | N                                   |
| NFATC1       | 0.847764176                            | N                                            | 32                                     | N                                   |
| AC007688.1   | 0.847780009                            | N                                            | 0                                      | N                                   |
| HGH1         | 0.847780009                            | N                                            | 3                                      | N                                   |
| POU3F1       | 0.847780009                            | N                                            | 2                                      | N                                   |
| AC011294.1   | 0.847794473                            | N                                            | 0                                      | N                                   |
| AC018797.1   | 0.847794473                            | N                                            | 0                                      | N                                   |
| AC106827.1   | 0.847794473                            | N                                            | 0                                      | N                                   |
| CPLX2        | 0.847794473                            | N                                            | 2                                      | N                                   |
| CRY2         | 0.847794473                            | N                                            | 38                                     | N                                   |
| DGCR9        | 0.847794473                            | N                                            | 0                                      | N                                   |
| KLF3P1       | 0.847794473                            | N                                            | 0                                      | N                                   |
| MCOLN3       | 0.847794473                            | N                                            | 1                                      | N                                   |
| OTOGL        | 0.847794473                            | N                                            | 0                                      | N                                   |
| PEX6         | 0.847794473                            | N                                            | 0                                      | N                                   |
| PIGW         | 0.847794473                            | N                                            | 0                                      | N                                   |
| ZNF624       | 0.847794473                            | N                                            | 0                                      | N                                   |
| AL157712.1   | 0.847826633                            | N                                            | 0                                      | N                                   |
| RAI1         | 0.847847912                            | N                                            | 2                                      | N                                   |
| AC008770.4   | 0.848039001                            | N                                            | 0                                      | N                                   |
| AL138756.1   | 0.848039001                            | N                                            | 0                                      | N                                   |
| DIAPH1       | 0.848039001                            | N                                            | 3                                      | N                                   |
| MYL5         | 0.848039001                            | N                                            | 1                                      | N                                   |
| AC006116.5   | 0.848042497                            | N                                            | 0                                      | N                                   |
| ZNF250       | 0.848063425                            | N                                            | 0                                      | N                                   |
| AC106806.1   | 0.848081773                            | N                                            | 0                                      | N                                   |
| HDGFL3       | 0.848083516                            | N                                            | 0                                      | N                                   |
| LRP4-AS1     | 0.848083516                            | N                                            | 0                                      | N                                   |
| ADGRG2       | 0.848393682                            | N                                            | 0                                      | N                                   |
| TTC13        | 0.848393682                            | N                                            | 0                                      | N                                   |
| CD2AP        | 0.84840947                             | N                                            | 10                                     | N                                   |
| APOBEC4      | 0.84853448                             | N                                            | 0                                      | N                                   |
| CSTF3-AS1    | 0.84869323                             | N                                            | 0                                      | N                                   |
| AC006116.6   | 0.848772978                            | N                                            | 0                                      | N                                   |
| AC090186.1   | 0.848772978                            | N                                            | 0                                      | N                                   |
| AL139147.1   | 0.848772978                            | N                                            | 0                                      | N                                   |
| AP001065.1   | 0.848772978                            | N                                            | 0                                      | N                                   |
| CYB5R2       | 0.848772978                            | N                                            | 2                                      | N                                   |
| MTSS1        | 0.848772978                            | N                                            | 5                                      | N                                   |
| OBSCN        | 0.848772978                            | N                                            | 0                                      | N                                   |
| RBM47        | 0.848772978                            | N                                            | 2                                      | N                                   |
| RPL38        | 0.848772978                            | N                                            | 1                                      | N                                   |
| VTI1BP2      | 0.848772978                            | N                                            | 0                                      | N                                   |
| FAM21EP      | 0.848775258                            | N                                            | 0                                      | N                                   |
| CCDC58       | 0.848841345                            | N                                            | 0                                      | N                                   |
| ZNF496       | 0.84884988                             | N                                            | 0                                      | N                                   |
| KANSL1L      | 0.8488605                              | N                                            | 0                                      | N                                   |
| PHLDB2       | 0.8488605                              | N                                            | 1                                      | N                                   |
| RN7SL118P    | 0.8488605                              | N                                            | 0                                      | N                                   |
| AC005736.2   | 0.848900491                            | N                                            | 0                                      | N                                   |
| NPC2         | 0.849148592                            | N                                            | 2                                      | N                                   |
| HBS1L        | 0.849165057                            | N                                            | 0                                      | N                                   |
| ZDHHC13      | 0.849165057                            | N                                            | 0                                      | N                                   |
| AC024592.3   | 0.849172997                            | N                                            | 0                                      | N                                   |
| TPRG1        | 0.849185479                            | N                                            | 0                                      | N                                   |
| KLHDC7B      | 0.849204429                            | N                                            | 0                                      | N                                   |
| H3F3A        | 0.849248272                            | N                                            | 0                                      | N                                   |

| Gene symbols | FDR (differential expression analysis) | Differentially expressed gene? Y, Yes; N, No | Number of insulin related publications | Insulin related gene? Y, Yes; N, No |
|--------------|----------------------------------------|----------------------------------------------|----------------------------------------|-------------------------------------|
| AC099654.2   | 0.849320911                            | N                                            | 0                                      | N                                   |
| RPS15        | 0.849320911                            | N                                            | 3                                      | N                                   |
| AP000550.1   | 0.84933094                             | N                                            | 0                                      | N                                   |
| ZNF703       | 0.849404786                            | N                                            | 0                                      | N                                   |
| AC090377.1   | 0.84941849                             | N                                            | 0                                      | N                                   |
| AKAP11       | 0.84941849                             | N                                            | 1                                      | N                                   |
| AL050331.1   | 0.84941849                             | N                                            | 0                                      | N                                   |
| HNRNPUL2     | 0.84941849                             | N                                            | 0                                      | N                                   |
| MCM3AP-AS1   | 0.84941849                             | N                                            | 0                                      | N                                   |
| MRPL22P1     | 0.84941849                             | N                                            | 0                                      | N                                   |
| RB1CC1       | 0.84941849                             | N                                            | 5                                      | N                                   |
| CHCHD3P1     | 0.849622069                            | N                                            | 0                                      | N                                   |
| GOLGA8S      | 0.849622069                            | N                                            | 0                                      | N                                   |
| TBCCD1       | 0.849622069                            | N                                            | 0                                      | N                                   |
| TNFAIP2      | 0.849622069                            | N                                            | 2                                      | N                                   |
| WISP3        | 0.849622069                            | N                                            | 34                                     | N                                   |
| BTF3L4P2     | 0.849668899                            | N                                            | 0                                      | N                                   |
| RNF10        | 0.849724164                            | N                                            | 2                                      | N                                   |
| C22orf39     | 0.849859843                            | N                                            | 0                                      | N                                   |
| SUPV3L1      | 0.849859843                            | N                                            | 0                                      | N                                   |
| SLC6A12      | 0.84997066                             | N                                            | 2                                      | N                                   |
| AC006160.1   | 0.850016083                            | N                                            | 0                                      | N                                   |
| AC012435.1   | 0.850073382                            | N                                            | 0                                      | N                                   |
| AKIRIN2P1    | 0.850073382                            | N                                            | 0                                      | N                                   |
| SAR1B        | 0.850073382                            | N                                            | 3                                      | N                                   |
| TGFBR3L      | 0.850073382                            | N                                            | 0                                      | N                                   |
| ACY1         | 0.850092735                            | N                                            | 2                                      | N                                   |
| TAOK2        | 0.850092735                            | N                                            | 0                                      | N                                   |
| AC005086.3   | 0.850104277                            | N                                            | 0                                      | N                                   |
| AC012409.5   | 0.850104277                            | N                                            | 0                                      | N                                   |
| AKIRIN1      | 0.850104277                            | N                                            | 0                                      | N                                   |
| AL022068.1   | 0.850104277                            | N                                            | 0                                      | N                                   |
| AL110115.1   | 0.850104277                            | N                                            | 0                                      | N                                   |
| AL136964.1   | 0.850104277                            | N                                            | 0                                      | N                                   |
| CCT8         | 0.850104277                            | N                                            | 0                                      | N                                   |
| PLEKHA3P1    | 0.850104277                            | N                                            | 0                                      | N                                   |
| PTPN20       | 0.850104277                            | N                                            | 0                                      | N                                   |
| STARD6       | 0.850104277                            | N                                            | 0                                      | N                                   |
| LARP1B       | 0.850108115                            | N                                            | 0                                      | N                                   |
| KCNC4        | 0.850219486                            | N                                            | 0                                      | N                                   |
| FOXP3-AS1    | 0.850276504                            | N                                            | 0                                      | N                                   |
| RBM14        | 0.850454468                            | N                                            | 0                                      | N                                   |
| SLC5A9       | 0.850454468                            | N                                            | 0                                      | N                                   |
| ZNF500       | 0.850454468                            | N                                            | 0                                      | N                                   |
| HDAC1P1      | 0.850454659                            | N                                            | 0                                      | N                                   |
| AC093817.1   | 0.850510375                            | N                                            | 0                                      | N                                   |
| AL590787.1   | 0.850510375                            | N                                            | 0                                      | N                                   |
| ARPC3P1      | 0.850510375                            | N                                            | 0                                      | N                                   |
| DFNA5        | 0.850510375                            | N                                            | 0                                      | N                                   |
| FASN         | 0.850510375                            | N                                            | 235                                    | Y                                   |
| HIP1R        | 0.850510375                            | N                                            | 1                                      | N                                   |
| KCNG4        | 0.850510375                            | N                                            | 0                                      | N                                   |
| MUL1         | 0.850510375                            | N                                            | 4                                      | N                                   |
| NACA         | 0.850510375                            | N                                            | 2                                      | N                                   |
| PA2G4P2      | 0.850510375                            | N                                            | 0                                      | N                                   |
| SH2B3        | 0.850510375                            | N                                            | 14                                     | N                                   |
| TUBB4BP2     | 0.850510375                            | N                                            | 0                                      | N                                   |
| LIFR         | 0.850527458                            | N                                            | 19                                     | N                                   |
| AC020571.1   | 0.850620798                            | N                                            | 0                                      | N                                   |
| ZNF599       | 0.850620798                            | N                                            | 0                                      | N                                   |
| AL512288.2   | 0.850650326                            | N                                            | 0                                      | N                                   |
| Z97634.1     | 0.850650326                            | N                                            | 0                                      | N                                   |
| NAIP         | 0.850654265                            | N                                            | 1                                      | N                                   |
| AC009407.1   | 0.850909298                            | N                                            | 0                                      | N                                   |
| AC025165.1   | 0.850909298                            | N                                            | 0                                      | N                                   |
| AL109811.1   | 0.850909298                            | N                                            | 0                                      | N                                   |

| Gene symbols | FDR (differential expression analysis) | Differentially expressed gene? Y, Yes; N, No | Number of insulin related publications | Insulin related gene? Y, Yes; N, No |
|--------------|----------------------------------------|----------------------------------------------|----------------------------------------|-------------------------------------|
| AL157935.1   | 0.850909298                            | N                                            | 0                                      | N                                   |
| ANKRD61      | 0.850909298                            | N                                            | 0                                      | N                                   |
| C22orf34     | 0.850909298                            | N                                            | 0                                      | N                                   |
| EID1         | 0.850909298                            | N                                            | 2                                      | N                                   |
| AC092646.1   | 0.851090715                            | N                                            | 0                                      | N                                   |
| GMPPA        | 0.851090715                            | N                                            | 0                                      | N                                   |
| NAPA         | 0.851090715                            | N                                            | 18                                     | N                                   |
| PTBP1P       | 0.851090715                            | N                                            | 0                                      | N                                   |
| RNF2P1       | 0.851090715                            | N                                            | 0                                      | N                                   |
| UFL1         | 0.851090715                            | N                                            | 1                                      | N                                   |
| PTP4A1P3     | 0.851117506                            | N                                            | 0                                      | N                                   |
| AC011611.4   | 0.851147373                            | N                                            | 0                                      | N                                   |
| LINC01391    | 0.851147373                            | N                                            | 0                                      | N                                   |
| METTL7A      | 0.851147373                            | N                                            | 0                                      | N                                   |
| NAP1L1       | 0.851147373                            | N                                            | 3                                      | N                                   |
| NMD3         | 0.851147373                            | N                                            | 1                                      | N                                   |
| PRPF40B      | 0.851147373                            | N                                            | 0                                      | N                                   |
| TEN1-CDK3    | 0.851147373                            | N                                            | 0                                      | N                                   |
| ZNF625       | 0.851147373                            | N                                            | 0                                      | N                                   |
| AC106707.2   | 0.851254912                            | N                                            | 0                                      | N                                   |
| SNRK-AS1     | 0.85130654                             | N                                            | 0                                      | N                                   |
| VWC2L        | 0.85130654                             | N                                            | 0                                      | N                                   |
| TCF25        | 0.851386261                            | N                                            | 0                                      | N                                   |
| ABHD16A      | 0.85141298                             | N                                            | 0                                      | N                                   |
| BMP3         | 0.851551958                            | N                                            | 10                                     | N                                   |
| SLC5A6       | 0.851608045                            | N                                            | 0                                      | N                                   |
| TECRP1       | 0.851685682                            | N                                            | 0                                      | N                                   |
| BCR          | 0.851916937                            | N                                            | 215                                    | Y                                   |
| AC092535.1   | 0.851954531                            | N                                            | 0                                      | N                                   |
| AP000695.3   | 0.851954531                            | N                                            | 0                                      | N                                   |
| ARPC5        | 0.851954531                            | N                                            | 0                                      | N                                   |
| BICD2        | 0.851954531                            | N                                            | 1                                      | N                                   |
| GRB10        | 0.851954531                            | N                                            | 143                                    | Y                                   |
| PPIAP16      | 0.851954531                            | N                                            | 0                                      | N                                   |
| TCERG1       | 0.851954531                            | N                                            | 2                                      | N                                   |
| AC005480.1   | 0.851956038                            | N                                            | 0                                      | N                                   |
| AMN1         | 0.851968533                            | N                                            | 0                                      | N                                   |
| PRKCQ-AS1    | 0.852101893                            | N                                            | 0                                      | N                                   |
| AC016582.2   | 0.85215545                             | N                                            | 0                                      | N                                   |
| AL365184.2   | 0.85215545                             | N                                            | 0                                      | N                                   |
| ARHGEF3      | 0.85215545                             | N                                            | 0                                      | N                                   |
| CISD1        | 0.85215545                             | N                                            | 8                                      | N                                   |
| DNAAF1       | 0.85215545                             | N                                            | 0                                      | N                                   |
| DND1         | 0.85215545                             | N                                            | 0                                      | N                                   |
| GAMT         | 0.85215545                             | N                                            | 5                                      | N                                   |
| MADCAM1      | 0.85215545                             | N                                            | 6                                      | N                                   |
| MTCO2P19     | 0.85215545                             | N                                            | 0                                      | N                                   |
| NCAM1        | 0.85215545                             | N                                            | 10                                     | N                                   |
| NPM1P24      | 0.85215545                             | N                                            | 0                                      | N                                   |
| PIP4K2A      | 0.85215545                             | N                                            | 1                                      | N                                   |
| PPP1R11P1    | 0.85215545                             | N                                            | 0                                      | N                                   |
| PTP4A1P1     | 0.85215545                             | N                                            | 0                                      | N                                   |
| RAD21-AS1    | 0.85215545                             | N                                            | 0                                      | N                                   |
| STK40        | 0.85215545                             | N                                            | 0                                      | N                                   |
| VSIR         | 0.85215545                             | N                                            | 0                                      | N                                   |
| TRAPPC9      | 0.852210949                            | N                                            | 0                                      | N                                   |
| NPM1P27      | 0.852277742                            | N                                            | 0                                      | N                                   |
| LLGL1        | 0.85228743                             | N                                            | 0                                      | N                                   |
| PSMB2        | 0.852474249                            | N                                            | 1                                      | N                                   |
| ST13         | 0.852474249                            | N                                            | 0                                      | N                                   |
| TOM1L2       | 0.852520791                            | N                                            | 0                                      | N                                   |
| AL356966.1   | 0.852546814                            | N                                            | 0                                      | N                                   |
| ARFGAP3      | 0.852546814                            | N                                            | 0                                      | N                                   |
| EBAG9        | 0.852546814                            | N                                            | 0                                      | N                                   |
| NR1I2        | 0.852546814                            | N                                            | 51                                     | N                                   |
| SULT2B1      | 0.852546814                            | N                                            | 2                                      | N                                   |

| Gene symbols | FDR (differential expression analysis) | Differentially expressed gene? Y, Yes; N, No | Number of insulin related publications | Insulin related gene? Y, Yes; N, No |
|--------------|----------------------------------------|----------------------------------------------|----------------------------------------|-------------------------------------|
| AC008676.1   | 0.852601305                            | N                                            | 0                                      | N                                   |
| AL139287.1   | 0.852601305                            | N                                            | 0                                      | N                                   |
| AC135983.3   | 0.852721145                            | N                                            | 0                                      | N                                   |
| AGER         | 0.852721145                            | N                                            | 58                                     | N                                   |
| AL049776.1   | 0.852721145                            | N                                            | 0                                      | N                                   |
| AC078850.2   | 0.852849334                            | N                                            | 0                                      | N                                   |
| BEX2         | 0.852887499                            | N                                            | 0                                      | N                                   |
| FIBCD1       | 0.852887499                            | N                                            | 0                                      | N                                   |
| AC026310.3   | 0.853082075                            | N                                            | 0                                      | N                                   |
| AC060780.1   | 0.853082075                            | N                                            | 0                                      | N                                   |
| CITED1       | 0.853082075                            | N                                            | 5                                      | N                                   |
| CPS1-IT1     | 0.853082075                            | N                                            | 0                                      | N                                   |
| MRS2         | 0.853082075                            | N                                            | 0                                      | N                                   |
| NANOS3       | 0.853082075                            | N                                            | 0                                      | N                                   |
| RAD18        | 0.853082075                            | N                                            | 1                                      | N                                   |
| S100A1       | 0.853082075                            | N                                            | 5                                      | N                                   |
| SLC4A11      | 0.853082075                            | N                                            | 0                                      | N                                   |
| SRRM2        | 0.853082075                            | N                                            | 0                                      | N                                   |
| MRPL2        | 0.853084405                            | N                                            | 0                                      | N                                   |
| AL445523.1   | 0.853085679                            | N                                            | 0                                      | N                                   |
| AUTS2        | 0.853085679                            | N                                            | 0                                      | N                                   |
| B9D1         | 0.853085679                            | N                                            | 0                                      | N                                   |
| CCDC112      | 0.853085679                            | N                                            | 0                                      | N                                   |
| EIF3E        | 0.853085679                            | N                                            | 19                                     | N                                   |
| SNHG26       | 0.853085679                            | N                                            | 0                                      | N                                   |
| SSUH2        | 0.853085679                            | N                                            | 0                                      | N                                   |
| TRRAP        | 0.853085679                            | N                                            | 0                                      | N                                   |
| ORAI1        | 0.853124511                            | N                                            | 20                                     | N                                   |
| LPAR2        | 0.853155983                            | N                                            | 1                                      | N                                   |
| MCCC1        | 0.853155983                            | N                                            | 3                                      | N                                   |
| AC114781.4   | 0.853165009                            | N                                            | 0                                      | N                                   |
| CDH2         | 0.853165009                            | N                                            | 10                                     | N                                   |
| SNX25        | 0.853165009                            | N                                            | 0                                      | N                                   |
| AP001011.1   | 0.853245688                            | N                                            | 0                                      | N                                   |
| AC091185.1   | 0.853303351                            | N                                            | 0                                      | N                                   |
| LINC00664    | 0.853303351                            | N                                            | 0                                      | N                                   |
| PRRT4        | 0.853344151                            | N                                            | 0                                      | N                                   |
| AC007906.2   | 0.853366886                            | N                                            | 0                                      | N                                   |
| AC115837.1   | 0.853366886                            | N                                            | 0                                      | N                                   |
| AL353898.3   | 0.853366886                            | N                                            | 0                                      | N                                   |
| BAG2         | 0.853366886                            | N                                            | 0                                      | N                                   |
| C17orf58     | 0.853366886                            | N                                            | 0                                      | N                                   |
| C2CD5        | 0.853366886                            | N                                            | 0                                      | N                                   |
| CCDC47       | 0.853366886                            | N                                            | 0                                      | N                                   |
| FBLN7        | 0.853366886                            | N                                            | 0                                      | N                                   |
| IQCJ         | 0.853366886                            | N                                            | 0                                      | N                                   |
| LINC01963    | 0.853366886                            | N                                            | 0                                      | N                                   |
| MIR222HG     | 0.853366886                            | N                                            | 0                                      | N                                   |
| MTATP6P19    | 0.853366886                            | N                                            | 0                                      | N                                   |
| MUC5AC       | 0.853366886                            | N                                            | 13                                     | N                                   |
| NR2F6        | 0.853366886                            | N                                            | 0                                      | N                                   |
| PAICSP4      | 0.853366886                            | N                                            | 0                                      | N                                   |
| PECAM1       | 0.853366886                            | N                                            | 9                                      | N                                   |
| PPP4R1L      | 0.853366886                            | N                                            | 0                                      | N                                   |
| PRDM11       | 0.853366886                            | N                                            | 0                                      | N                                   |
| RAB34        | 0.853366886                            | N                                            | 1                                      | N                                   |
| SHE          | 0.853366886                            | N                                            | 1000                                   | Y                                   |
| SLC35A3      | 0.853366886                            | N                                            | 0                                      | N                                   |
| GOLGA4       | 0.853374809                            | N                                            | 0                                      | N                                   |
| TFF3         | 0.853378402                            | N                                            | 23                                     | N                                   |
| ASB14        | 0.853433786                            | N                                            | 1                                      | N                                   |
| ZC2HC1C      | 0.853590289                            | N                                            | 0                                      | N                                   |
| AP1S2        | 0.853622627                            | N                                            | 0                                      | N                                   |
| BACH1-IT1    | 0.853622627                            | N                                            | 0                                      | N                                   |
| C1orf210     | 0.853622627                            | N                                            | 0                                      | N                                   |
| C3orf62      | 0.853622627                            | N                                            | 0                                      | N                                   |

| Gene symbols | FDR (differential expression analysis) | Differentially expressed gene? Y, Yes; N, No | Number of insulin related publications | Insulin related gene? Y, Yes; N, No |
|--------------|----------------------------------------|----------------------------------------------|----------------------------------------|-------------------------------------|
| CTU2         | 0.853622627                            | N                                            | 0                                      | N                                   |
| KCNA3        | 0.853622627                            | N                                            | 11                                     | N                                   |
| LINC01970    | 0.853622627                            | N                                            | 0                                      | N                                   |
| MED4         | 0.853622627                            | N                                            | 2                                      | N                                   |
| MRPS23       | 0.853622627                            | N                                            | 0                                      | N                                   |
| PAICS        | 0.853622627                            | N                                            | 0                                      | N                                   |
| RN7SKP23     | 0.853622627                            | N                                            | 0                                      | N                                   |
| RRBP1        | 0.853622627                            | N                                            | 0                                      | N                                   |
| SBSPON       | 0.853622627                            | N                                            | 0                                      | N                                   |
| SCO1         | 0.853622627                            | N                                            | 3                                      | N                                   |
| YTHDC1       | 0.853622627                            | N                                            | 0                                      | N                                   |
| ZNF451       | 0.853622627                            | N                                            | 0                                      | N                                   |
| RAVER2       | 0.853730677                            | N                                            | 0                                      | N                                   |
| RARA         | 0.853828624                            | N                                            | 31                                     | N                                   |
| DPP6         | 0.853860901                            | N                                            | 3                                      | N                                   |
| RBFOX1       | 0.854130234                            | N                                            | 2                                      | N                                   |
| RPAP1        | 0.854130234                            | N                                            | 0                                      | N                                   |
| AL356488.3   | 0.854149879                            | N                                            | 0                                      | N                                   |
| ATP5J        | 0.854149879                            | N                                            | 2                                      | N                                   |
| EEF1DP2      | 0.854149879                            | N                                            | 0                                      | N                                   |
| FAM91A1      | 0.854149879                            | N                                            | 0                                      | N                                   |
| GOLGA8A      | 0.854149879                            | N                                            | 0                                      | N                                   |
| LINC00554    | 0.854149879                            | N                                            | 0                                      | N                                   |
| MDN1         | 0.854149879                            | N                                            | 0                                      | N                                   |
| OLA1         | 0.854149879                            | N                                            | 0                                      | N                                   |
| RALGAPA2     | 0.854149879                            | N                                            | 2                                      | N                                   |
| RBMS3-AS2    | 0.854149879                            | N                                            | 0                                      | N                                   |
| RTP4         | 0.854149879                            | N                                            | 0                                      | N                                   |
| TMEM206      | 0.854149879                            | N                                            | 0                                      | N                                   |
| RNF39        | 0.85419444                             | N                                            | 1                                      | N                                   |
| CACNG8       | 0.854215125                            | N                                            | 0                                      | N                                   |
| PSMA2        | 0.854215125                            | N                                            | 0                                      | N                                   |
| TATDN1       | 0.854248127                            | N                                            | 0                                      | N                                   |
| NFKBIZ       | 0.854368998                            | N                                            | 0                                      | N                                   |
| WNT8B        | 0.854572578                            | N                                            | 1                                      | N                                   |
| AC127537.3   | 0.854642341                            | N                                            | 0                                      | N                                   |
| C11orf95     | 0.854642341                            | N                                            | 0                                      | N                                   |
| ECHDC3       | 0.854648109                            | N                                            | 2                                      | N                                   |
| RFT1         | 0.854648109                            | N                                            | 0                                      | N                                   |
| ST8SIA5      | 0.854648109                            | N                                            | 0                                      | N                                   |
| WHAMM        | 0.854648109                            | N                                            | 0                                      | N                                   |
| NOX4         | 0.854706874                            | N                                            | 134                                    | Y                                   |
| LINC01694    | 0.85472485                             | N                                            | 0                                      | N                                   |
| AC138623.1   | 0.854827591                            | N                                            | 0                                      | N                                   |
| NAT6         | 0.854827591                            | N                                            | 0                                      | N                                   |
| TSKS         | 0.85483979                             | N                                            | 0                                      | N                                   |
| PPP1R2P1     | 0.854845994                            | N                                            | 0                                      | N                                   |
| AC138150.1   | 0.85484953                             | N                                            | 0                                      | N                                   |
| Metazoa_SRP  | 0.85484953                             | N                                            | 0                                      | N                                   |
| AL354919.1   | 0.854851379                            | N                                            | 0                                      | N                                   |
| AL583839.1   | 0.854851379                            | N                                            | 0                                      | N                                   |
| BCAP29       | 0.854851379                            | N                                            | 0                                      | N                                   |
| KMT2B        | 0.854851379                            | N                                            | 2                                      | N                                   |
| LENG8        | 0.854851379                            | N                                            | 0                                      | N                                   |
| SPG20-AS1    | 0.854851379                            | N                                            | 0                                      | N                                   |
| UBXN10       | 0.854851379                            | N                                            | 0                                      | N                                   |
| ZIC1         | 0.854851379                            | N                                            | 3                                      | N                                   |
| AC006011.2   | 0.854857028                            | N                                            | 0                                      | N                                   |
| AC007637.1   | 0.854857028                            | N                                            | 0                                      | N                                   |
| AC016738.1   | 0.854857028                            | N                                            | 0                                      | N                                   |
| AC119751.5   | 0.854857028                            | N                                            | 0                                      | N                                   |
| AC245389.2   | 0.854857028                            | N                                            | 0                                      | N                                   |
| AFDN-AS1     | 0.854857028                            | N                                            | 0                                      | N                                   |
| AL138781.1   | 0.854857028                            | N                                            | 0                                      | N                                   |
| AL445223.1   | 0.854857028                            | N                                            | 0                                      | N                                   |
| AL512633.1   | 0.854857028                            | N                                            | 0                                      | N                                   |

| Gene symbols | FDR (differential expression analysis) | Differentially expressed gene? Y, Yes; N, No | Number of insulin related publications | Insulin related gene? Y, Yes; N, No |
|--------------|----------------------------------------|----------------------------------------------|----------------------------------------|-------------------------------------|
| AP000873.2   | 0.854857028                            | N                                            | 0                                      | N                                   |
| AP005121.1   | 0.854857028                            | N                                            | 0                                      | N                                   |
| BNC1         | 0.854857028                            | N                                            | 0                                      | N                                   |
| BTBD10P1     | 0.854857028                            | N                                            | 0                                      | N                                   |
| FOX12        | 0.854857028                            | N                                            | 0                                      | N                                   |
| GGT7         | 0.854857028                            | N                                            | 0                                      | N                                   |
| HS3ST1       | 0.854857028                            | N                                            | 1                                      | N                                   |
| HYI          | 0.854857028                            | N                                            | 0                                      | N                                   |
| ISY1-RAB43   | 0.854857028                            | N                                            | 0                                      | N                                   |
| ITPKC        | 0.854857028                            | N                                            | 0                                      | N                                   |
| PIGF         | 0.854857028                            | N                                            | 43                                     | N                                   |
| PTDSS1       | 0.854857028                            | N                                            | 1                                      | N                                   |
| RAB6C        | 0.854857028                            | N                                            | 0                                      | N                                   |
| SURF6        | 0.854857028                            | N                                            | 0                                      | N                                   |
| TSEN15       | 0.854857028                            | N                                            | 0                                      | N                                   |
| MED18        | 0.854971321                            | N                                            | 0                                      | N                                   |
| PCMT1        | 0.854978208                            | N                                            | 4                                      | N                                   |
| AC092910.1   | 0.855040984                            | N                                            | 0                                      | N                                   |
| UBE2D1       | 0.855040984                            | N                                            | 0                                      | N                                   |
| ECSIT        | 0.855076505                            | N                                            | 0                                      | N                                   |
| PLEKHM2      | 0.855130646                            | N                                            | 0                                      | N                                   |
| RGL3         | 0.855208359                            | N                                            | 0                                      | N                                   |
| ZCCHC14      | 0.855208359                            | N                                            | 0                                      | N                                   |
| AC093162.2   | 0.855213964                            | N                                            | 0                                      | N                                   |
| ATP6V1B2     | 0.855213964                            | N                                            | 1                                      | N                                   |
| CASP3        | 0.855213964                            | N                                            | 1000                                   | Y                                   |
| DYNAP        | 0.855213964                            | N                                            | 0                                      | N                                   |
| FLJ27354     | 0.855213964                            | N                                            | 0                                      | N                                   |
| LAMTOR3P1    | 0.855213964                            | N                                            | 0                                      | N                                   |
| LGMNP1       | 0.855213964                            | N                                            | 0                                      | N                                   |
| MESTP1       | 0.855213964                            | N                                            | 0                                      | N                                   |
| RN7SL329P    | 0.855213964                            | N                                            | 0                                      | N                                   |
| STX1B        | 0.855213964                            | N                                            | 0                                      | N                                   |
| AP000593.2   | 0.855254753                            | N                                            | 0                                      | N                                   |
| PSTPIP1      | 0.855270984                            | N                                            | 0                                      | N                                   |
| AC008895.1   | 0.855437873                            | N                                            | 0                                      | N                                   |
| AC092135.1   | 0.855481475                            | N                                            | 0                                      | N                                   |
| DENND6B      | 0.855821509                            | N                                            | 0                                      | N                                   |
| KTN1-AS1     | 0.855821509                            | N                                            | 0                                      | N                                   |
| NAMA         | 0.855821509                            | N                                            | 3                                      | N                                   |
| ABI3         | 0.85583563                             | N                                            | 0                                      | N                                   |
| AC002519.2   | 0.85583563                             | N                                            | 0                                      | N                                   |
| ADNP-AS1     | 0.85583563                             | N                                            | 0                                      | N                                   |
| AL353583.1   | 0.85583563                             | N                                            | 0                                      | N                                   |
| AL451064.1   | 0.85583563                             | N                                            | 0                                      | N                                   |
| ARL6IP1P3    | 0.85583563                             | N                                            | 0                                      | N                                   |
| CELF4        | 0.85583563                             | N                                            | 1                                      | N                                   |
| NDUFA10      | 0.85583563                             | N                                            | 2                                      | N                                   |
| SAMD3        | 0.85583563                             | N                                            | 0                                      | N                                   |
| SDAD1        | 0.85583563                             | N                                            | 0                                      | N                                   |
| ST3GAL2      | 0.855860445                            | N                                            | 1                                      | N                                   |
| C13orf42     | 0.855868022                            | N                                            | 0                                      | N                                   |
| AC008969.1   | 0.855874534                            | N                                            | 0                                      | N                                   |
| DMWD         | 0.855874534                            | N                                            | 0                                      | N                                   |
| POMK         | 0.855874534                            | N                                            | 0                                      | N                                   |
| SNX12        | 0.855874534                            | N                                            | 0                                      | N                                   |
| ZNF335       | 0.855874534                            | N                                            | 0                                      | N                                   |
| NAT8L        | 0.855948598                            | N                                            | 1                                      | N                                   |
| PLSCR3       | 0.85597715                             | N                                            | 1                                      | N                                   |
| QSOX2        | 0.85597715                             | N                                            | 2                                      | N                                   |
| CPT1A        | 0.85600412                             | N                                            | 125                                    | Y                                   |
| NFS1         | 0.85600412                             | N                                            | 0                                      | N                                   |
| CASD1        | 0.856188181                            | N                                            | 0                                      | N                                   |
| DYNC2H1      | 0.856188181                            | N                                            | 0                                      | N                                   |
| ARF1         | 0.856272999                            | N                                            | 12                                     | N                                   |
| CHST7        | 0.856272999                            | N                                            | 0                                      | N                                   |

| Gene symbols | FDR (differential expression analysis) | Differentially expressed gene? Y, Yes; N, No | Number of insulin related publications | Insulin related gene? Y, Yes; N, No |
|--------------|----------------------------------------|----------------------------------------------|----------------------------------------|-------------------------------------|
| LINC02324    | 0.856272999                            | N                                            | 0                                      | N                                   |
| LMBRD2       | 0.856272999                            | N                                            | 0                                      | N                                   |
| RAP2B        | 0.856272999                            | N                                            | 1                                      | N                                   |
| TRAF3IP1     | 0.856272999                            | N                                            | 0                                      | N                                   |
| EIF1AXP1     | 0.856332902                            | N                                            | 0                                      | N                                   |
| MYO15B       | 0.856427387                            | N                                            | 0                                      | N                                   |
| AC100800.1   | 0.856450168                            | N                                            | 0                                      | N                                   |
| AC121333.1   | 0.856450168                            | N                                            | 0                                      | N                                   |
| IPO9-AS1     | 0.856450168                            | N                                            | 0                                      | N                                   |
| RFESDP1      | 0.856450168                            | N                                            | 0                                      | N                                   |
| SOCS5        | 0.856450168                            | N                                            | 1                                      | N                                   |
| NDUFA7       | 0.856508708                            | N                                            | 0                                      | N                                   |
| NPLOC4       | 0.856606403                            | N                                            | 0                                      | N                                   |
| AL132655.1   | 0.856787984                            | N                                            | 0                                      | N                                   |
| AL022323.3   | 0.856831063                            | N                                            | 0                                      | N                                   |
| SMKR1        | 0.856845042                            | N                                            | 0                                      | N                                   |
| CDPF1        | 0.856901691                            | N                                            | 0                                      | N                                   |
| C1orf162     | 0.856985859                            | N                                            | 0                                      | N                                   |
| MIF4GD       | 0.856985859                            | N                                            | 0                                      | N                                   |
| MX1          | 0.856985859                            | N                                            | 8                                      | N                                   |
| MYPOP        | 0.85703947                             | N                                            | 0                                      | N                                   |
| PKNOX2       | 0.85703947                             | N                                            | 1                                      | N                                   |
| RDX          | 0.85703947                             | N                                            | 2                                      | N                                   |
| PEX12P1      | 0.857189881                            | N                                            | 0                                      | N                                   |
| TAF1L        | 0.857230387                            | N                                            | 0                                      | N                                   |
| AC016949.1   | 0.857245226                            | N                                            | 0                                      | N                                   |
| SF3B2        | 0.857292322                            | N                                            | 0                                      | N                                   |
| NT5C3A       | 0.857304977                            | N                                            | 1                                      | N                                   |
| FDX2         | 0.857323205                            | N                                            | 0                                      | N                                   |
| USP42        | 0.857356566                            | N                                            | 0                                      | N                                   |
| PTBP2        | 0.857377153                            | N                                            | 3                                      | N                                   |
| AC015802.3   | 0.857613915                            | N                                            | 0                                      | N                                   |
| AC106820.1   | 0.857613915                            | N                                            | 0                                      | N                                   |
| AL359740.1   | 0.857613915                            | N                                            | 0                                      | N                                   |
| ANXA9        | 0.857613915                            | N                                            | 0                                      | N                                   |
| KRT23        | 0.857613915                            | N                                            | 0                                      | N                                   |
| MAN2C1       | 0.857613915                            | N                                            | 0                                      | N                                   |
| PGGT1BP2     | 0.857613915                            | N                                            | 0                                      | N                                   |
| TCHH         | 0.857613915                            | N                                            | 1                                      | N                                   |
| TMEM140      | 0.857613915                            | N                                            | 0                                      | N                                   |
| ZSCAN29      | 0.857679241                            | N                                            | 0                                      | N                                   |
| SRPRA        | 0.85770472                             | N                                            | 0                                      | N                                   |
| AC083799.1   | 0.857781384                            | N                                            | 0                                      | N                                   |
| WDR7         | 0.857781384                            | N                                            | 1                                      | N                                   |
| CYP51A1-AS1  | 0.857788417                            | N                                            | 0                                      | N                                   |
| FAM212B      | 0.857795459                            | N                                            | 0                                      | N                                   |
| RAB1F        | 0.857795459                            | N                                            | 1                                      | N                                   |
| ADCY3        | 0.857818132                            | N                                            | 8                                      | N                                   |
| ANKEF1       | 0.857818132                            | N                                            | 0                                      | N                                   |
| KRT18P31     | 0.857818132                            | N                                            | 0                                      | N                                   |
| PPP1R15A     | 0.857818132                            | N                                            | 10                                     | N                                   |
| TGFBRAP1     | 0.857839925                            | N                                            | 1                                      | N                                   |
| AC011933.2   | 0.857949159                            | N                                            | 0                                      | N                                   |
| AC022819.1   | 0.857949159                            | N                                            | 0                                      | N                                   |
| AC253576.2   | 0.857949159                            | N                                            | 0                                      | N                                   |
| ALOX12P2     | 0.857949159                            | N                                            | 0                                      | N                                   |
| BX470102.1   | 0.857949159                            | N                                            | 0                                      | N                                   |
| GPBP1        | 0.857949159                            | N                                            | 1                                      | N                                   |
| LNX1         | 0.857949159                            | N                                            | 0                                      | N                                   |
| PSMB5        | 0.857949159                            | N                                            | 4                                      | N                                   |
| RHBDL2       | 0.857949159                            | N                                            | 0                                      | N                                   |
| S100A10      | 0.857949159                            | N                                            | 1                                      | N                                   |
| SRCIN1       | 0.857949159                            | N                                            | 0                                      | N                                   |
| STRAP        | 0.857949159                            | N                                            | 5                                      | N                                   |
| UBE2Q2P10    | 0.857949159                            | N                                            | 0                                      | N                                   |
| WDSUB1       | 0.857949159                            | N                                            | 0                                      | N                                   |

| Gene symbols | FDR (differential expression analysis) | Differentially expressed gene? Y, Yes; N, No | Number of insulin related publications | Insulin related gene? Y, Yes; N, No |
|--------------|----------------------------------------|----------------------------------------------|----------------------------------------|-------------------------------------|
| AC139887.2   | 0.858028041                            | N                                            | 0                                      | N                                   |
| RPAIN        | 0.858028041                            | N                                            | 0                                      | N                                   |
| SCARA5       | 0.858028041                            | N                                            | 1                                      | N                                   |
| TAF13        | 0.858028041                            | N                                            | 1                                      | N                                   |
| TRIM66       | 0.858028041                            | N                                            | 0                                      | N                                   |
| ZNRF3-AS1    | 0.858028041                            | N                                            | 0                                      | N                                   |
| AC007996.1   | 0.85804833                             | N                                            | 0                                      | N                                   |
| AC009061.2   | 0.85804833                             | N                                            | 0                                      | N                                   |
| AC034238.2   | 0.85804833                             | N                                            | 0                                      | N                                   |
| AC104809.2   | 0.85804833                             | N                                            | 0                                      | N                                   |
| AC118758.3   | 0.85804833                             | N                                            | 0                                      | N                                   |
| AC244636.2   | 0.85804833                             | N                                            | 0                                      | N                                   |
| AL353150.1   | 0.85804833                             | N                                            | 0                                      | N                                   |
| CHD4         | 0.85804833                             | N                                            | 1                                      | N                                   |
| CYP2T1P      | 0.85804833                             | N                                            | 0                                      | N                                   |
| DDX60        | 0.85804833                             | N                                            | 0                                      | N                                   |
| ERF          | 0.85804833                             | N                                            | 5                                      | N                                   |
| GMEB1        | 0.85804833                             | N                                            | 0                                      | N                                   |
| MTMR8        | 0.85804833                             | N                                            | 0                                      | N                                   |
| PGAP1        | 0.85804833                             | N                                            | 0                                      | N                                   |
| RPL13AP7     | 0.85804833                             | N                                            | 0                                      | N                                   |
| TTC7A        | 0.85804833                             | N                                            | 1                                      | N                                   |
| UBXN6        | 0.85804833                             | N                                            | 0                                      | N                                   |
| ZDHHC3       | 0.85804833                             | N                                            | 1                                      | N                                   |
| ZNF169       | 0.85804833                             | N                                            | 0                                      | N                                   |
| ZNF395       | 0.85804833                             | N                                            | 0                                      | N                                   |
| ZNF579       | 0.85804833                             | N                                            | 0                                      | N                                   |
| GLRX         | 0.858062511                            | N                                            | 4                                      | N                                   |
| GPC1         | 0.858062511                            | N                                            | 2                                      | N                                   |
| TPRKBP2      | 0.858073637                            | N                                            | 0                                      | N                                   |
| NRIP2        | 0.858160271                            | N                                            | 0                                      | N                                   |
| AC093525.7   | 0.858365197                            | N                                            | 0                                      | N                                   |
| AL117350.1   | 0.858365197                            | N                                            | 0                                      | N                                   |
| C1orf226     | 0.858365197                            | N                                            | 0                                      | N                                   |
| CAMK2N2      | 0.858365197                            | N                                            | 0                                      | N                                   |
| CCDC169      | 0.858365197                            | N                                            | 0                                      | N                                   |
| AL590542.1   | 0.858410609                            | N                                            | 0                                      | N                                   |
| HYKK         | 0.858410609                            | N                                            | 0                                      | N                                   |
| PCNPP1       | 0.858410609                            | N                                            | 0                                      | N                                   |
| SNX5P1       | 0.858410609                            | N                                            | 0                                      | N                                   |
| AC004899.2   | 0.858423122                            | N                                            | 0                                      | N                                   |
| LRRN2        | 0.858423122                            | N                                            | 0                                      | N                                   |
| WNT3         | 0.858423122                            | N                                            | 18                                     | N                                   |
| NAT16        | 0.858463833                            | N                                            | 0                                      | N                                   |
| ACTR3BP2     | 0.858591513                            | N                                            | 0                                      | N                                   |
| AD000671.1   | 0.858591513                            | N                                            | 0                                      | N                                   |
| CEBPA-AS1    | 0.858591513                            | N                                            | 0                                      | N                                   |
| COX5A        | 0.858591513                            | N                                            | 6                                      | N                                   |
| OXSRI        | 0.858591513                            | N                                            | 0                                      | N                                   |
| PRRT2        | 0.858591513                            | N                                            | 0                                      | N                                   |
| SARIAP4      | 0.858591513                            | N                                            | 0                                      | N                                   |
| AC005230.1   | 0.858625456                            | N                                            | 0                                      | N                                   |
| AC008946.1   | 0.858625456                            | N                                            | 0                                      | N                                   |
| ANKRD11      | 0.858625456                            | N                                            | 0                                      | N                                   |
| AP000229.1   | 0.858625456                            | N                                            | 0                                      | N                                   |
| CRABP2       | 0.858625456                            | N                                            | 5                                      | N                                   |
| FUT8-AS1     | 0.858625456                            | N                                            | 0                                      | N                                   |
| RP4-714D9.5  | 0.858625456                            | N                                            | 0                                      | N                                   |
| SPTBN1       | 0.858625456                            | N                                            | 3                                      | N                                   |
| C16orf71     | 0.858701976                            | N                                            | 0                                      | N                                   |
| AQP6         | 0.858709915                            | N                                            | 0                                      | N                                   |
| SCNM1        | 0.858709915                            | N                                            | 0                                      | N                                   |
| ZNF746       | 0.858709915                            | N                                            | 2                                      | N                                   |
| RPL5P1       | 0.858868343                            | N                                            | 0                                      | N                                   |
| GPR89B       | 0.85899748                             | N                                            | 0                                      | N                                   |
| GRID1        | 0.859135471                            | N                                            | 0                                      | N                                   |



| Gene symbols | FDR (differential expression analysis) | Differentially expressed gene? Y, Yes; N, No | Number of insulin related publications | Insulin related gene? Y, Yes; N, No |
|--------------|----------------------------------------|----------------------------------------------|----------------------------------------|-------------------------------------|
| LINC02246    | 0.859192631                            | N                                            | 0                                      | N                                   |
| NIFKP8       | 0.859214525                            | N                                            | 0                                      | N                                   |
| AC022239.4   | 0.859249016                            | N                                            | 0                                      | N                                   |
| ADIPOR1P2    | 0.859249016                            | N                                            | 0                                      | N                                   |
| AP000802.1   | 0.859249016                            | N                                            | 0                                      | N                                   |
| ARRB1        | 0.859249016                            | N                                            | 19                                     | N                                   |
| LINC01285    | 0.859249016                            | N                                            | 0                                      | N                                   |
| S100A6       | 0.859249016                            | N                                            | 4                                      | N                                   |
| TNRC6A       | 0.859249016                            | N                                            | 1                                      | N                                   |
| MEN1         | 0.859298219                            | N                                            | 192                                    | Y                                   |
| AC007656.2   | 0.859348953                            | N                                            | 0                                      | N                                   |
| AC009967.1   | 0.859348953                            | N                                            | 0                                      | N                                   |
| AC011978.2   | 0.859348953                            | N                                            | 0                                      | N                                   |
| AL136295.5   | 0.859348953                            | N                                            | 0                                      | N                                   |
| ELOVL4       | 0.859348953                            | N                                            | 1                                      | N                                   |
| LINC02298    | 0.859348953                            | N                                            | 0                                      | N                                   |
| MAN1B1-AS1   | 0.859348953                            | N                                            | 0                                      | N                                   |
| NPHP3        | 0.859348953                            | N                                            | 0                                      | N                                   |
| RPL5P29      | 0.859348953                            | N                                            | 0                                      | N                                   |
| TMED7-TICAM2 | 0.859348953                            | N                                            | 0                                      | N                                   |
| AC108676.1   | 0.859409378                            | N                                            | 0                                      | N                                   |
| AC020916.1   | 0.859492133                            | N                                            | 0                                      | N                                   |
| AC089983.1   | 0.859492133                            | N                                            | 0                                      | N                                   |
| AC239799.2   | 0.859492133                            | N                                            | 0                                      | N                                   |
| AL138785.1   | 0.859492133                            | N                                            | 0                                      | N                                   |
| GDF9         | 0.859492133                            | N                                            | 24                                     | N                                   |
| GTPBP10      | 0.859492133                            | N                                            | 0                                      | N                                   |
| HSPA8P7      | 0.859492133                            | N                                            | 0                                      | N                                   |
| WNT9A        | 0.859492133                            | N                                            | 4                                      | N                                   |
| ZNF575       | 0.859492133                            | N                                            | 0                                      | N                                   |
| LASP1        | 0.859506207                            | N                                            | 2                                      | N                                   |
| ZFAND2A      | 0.859506207                            | N                                            | 0                                      | N                                   |
| JUN          | 0.859534077                            | N                                            | 1000                                   | Y                                   |
| PNCK         | 0.859534077                            | N                                            | 2                                      | N                                   |
| TICAM1       | 0.859534077                            | N                                            | 3                                      | N                                   |
| AF121898.1   | 0.859631211                            | N                                            | 0                                      | N                                   |
| HEMK1        | 0.859631211                            | N                                            | 0                                      | N                                   |
| SURF1        | 0.859631211                            | N                                            | 5                                      | N                                   |
| ADH1C        | 0.859663154                            | N                                            | 1                                      | N                                   |
| ATP6V0A2     | 0.859880425                            | N                                            | 0                                      | N                                   |
| FRG1         | 0.859880425                            | N                                            | 0                                      | N                                   |
| NBPF10       | 0.859880425                            | N                                            | 0                                      | N                                   |
| POU4F1       | 0.859880425                            | N                                            | 4                                      | N                                   |
| AC007529.1   | 0.860020439                            | N                                            | 0                                      | N                                   |
| MYO1F        | 0.860020439                            | N                                            | 0                                      | N                                   |
| MPP4         | 0.860058322                            | N                                            | 0                                      | N                                   |
| AP000347.2   | 0.860236003                            | N                                            | 0                                      | N                                   |
| CDK12        | 0.860236003                            | N                                            | 1                                      | N                                   |
| VTA1         | 0.860286145                            | N                                            | 0                                      | N                                   |
| AL023803.3   | 0.860412019                            | N                                            | 0                                      | N                                   |
| NADSYN1      | 0.86045824                             | N                                            | 2                                      | N                                   |
| SLC35A5      | 0.860492552                            | N                                            | 0                                      | N                                   |
| WEE1         | 0.860492552                            | N                                            | 2                                      | N                                   |
| RHOT2        | 0.860517902                            | N                                            | 0                                      | N                                   |
| AC092435.4   | 0.860863458                            | N                                            | 0                                      | N                                   |
| AL161725.1   | 0.860863458                            | N                                            | 0                                      | N                                   |
| NLRP3P1      | 0.860863458                            | N                                            | 0                                      | N                                   |
| CDK2AP1      | 0.860994489                            | N                                            | 0                                      | N                                   |
| BRI3P1       | 0.861030867                            | N                                            | 0                                      | N                                   |
| AC135012.1   | 0.861034955                            | N                                            | 0                                      | N                                   |
| CNTN4        | 0.861034955                            | N                                            | 1                                      | N                                   |
| TMEM220      | 0.861034955                            | N                                            | 0                                      | N                                   |
| AC012313.4   | 0.861235095                            | N                                            | 0                                      | N                                   |
| AC084816.1   | 0.861235095                            | N                                            | 0                                      | N                                   |
| ANAPC1P1     | 0.861235095                            | N                                            | 0                                      | N                                   |
| ANKRD33B     | 0.861235095                            | N                                            | 0                                      | N                                   |

| Gene symbols | FDR (differential expression analysis) | Differentially expressed gene? Y, Yes; N, No | Number of insulin related publications | Insulin related gene? Y, Yes; N, No |
|--------------|----------------------------------------|----------------------------------------------|----------------------------------------|-------------------------------------|
| DUSP19       | 0.861235095                            | N                                            | 0                                      | N                                   |
| MT1X         | 0.861235095                            | N                                            | 1                                      | N                                   |
| RN7SL605P    | 0.861235095                            | N                                            | 0                                      | N                                   |
| RTL3         | 0.861235095                            | N                                            | 0                                      | N                                   |
| SRR          | 0.861257301                            | N                                            | 23                                     | N                                   |
| MOCS2        | 0.861356274                            | N                                            | 0                                      | N                                   |
| SAA1         | 0.861356274                            | N                                            | 17                                     | N                                   |
| RP1-34H18.1  | 0.861368841                            | N                                            | 0                                      | N                                   |
| HUNK         | 0.862039902                            | N                                            | 1                                      | N                                   |
| HDAC1P2      | 0.862147597                            | N                                            | 0                                      | N                                   |
| RPS24P13     | 0.862147597                            | N                                            | 0                                      | N                                   |
| AC068389.1   | 0.862170591                            | N                                            | 0                                      | N                                   |
| AC124242.2   | 0.862170591                            | N                                            | 0                                      | N                                   |
| AC133065.4   | 0.862170591                            | N                                            | 0                                      | N                                   |
| AC144548.2   | 0.862170591                            | N                                            | 0                                      | N                                   |
| ACACB        | 0.862170591                            | N                                            | 40                                     | N                                   |
| AKR7A2P1     | 0.862170591                            | N                                            | 0                                      | N                                   |
| ANAPC5       | 0.862170591                            | N                                            | 0                                      | N                                   |
| AP000942.1   | 0.862170591                            | N                                            | 0                                      | N                                   |
| BMPR1APS1    | 0.862170591                            | N                                            | 0                                      | N                                   |
| CASC3        | 0.862170591                            | N                                            | 0                                      | N                                   |
| CBARP        | 0.862170591                            | N                                            | 0                                      | N                                   |
| HFM1         | 0.862170591                            | N                                            | 0                                      | N                                   |
| LINC01666    | 0.862170591                            | N                                            | 0                                      | N                                   |
| LPO          | 0.862170591                            | N                                            | 141                                    | Y                                   |
| MAEA         | 0.862170591                            | N                                            | 6                                      | N                                   |
| METAP2       | 0.862170591                            | N                                            | 2                                      | N                                   |
| MIER3        | 0.862170591                            | N                                            | 0                                      | N                                   |
| MIPEPP3      | 0.862170591                            | N                                            | 0                                      | N                                   |
| NID2         | 0.862170591                            | N                                            | 1                                      | N                                   |
| PEX7         | 0.862170591                            | N                                            | 1                                      | N                                   |
| PIGL         | 0.862170591                            | N                                            | 0                                      | N                                   |
| PLEKHO2      | 0.862170591                            | N                                            | 0                                      | N                                   |
| POMT1        | 0.862170591                            | N                                            | 0                                      | N                                   |
| PTHLH        | 0.862170591                            | N                                            | 25                                     | N                                   |
| RAVER1       | 0.862170591                            | N                                            | 0                                      | N                                   |
| SAMD12       | 0.862170591                            | N                                            | 1                                      | N                                   |
| SLCO2A1      | 0.862170591                            | N                                            | 1                                      | N                                   |
| SPIN2A       | 0.862170591                            | N                                            | 0                                      | N                                   |
| PPFIA4       | 0.862182197                            | N                                            | 0                                      | N                                   |
| TST          | 0.862249452                            | N                                            | 44                                     | N                                   |
| MIER2        | 0.862331688                            | N                                            | 0                                      | N                                   |
| GOLGA6L4     | 0.862335735                            | N                                            | 0                                      | N                                   |
| MARS2        | 0.862335735                            | N                                            | 0                                      | N                                   |
| OSBP2        | 0.862366089                            | N                                            | 1                                      | N                                   |
| AC027288.1   | 0.862463601                            | N                                            | 0                                      | N                                   |
| AWAT2        | 0.862593764                            | N                                            | 0                                      | N                                   |
| RN7SL455P    | 0.862593764                            | N                                            | 0                                      | N                                   |
| RAPSN        | 0.862650871                            | N                                            | 0                                      | N                                   |
| AP1B1        | 0.862659115                            | N                                            | 0                                      | N                                   |
| CRIPAK       | 0.862659115                            | N                                            | 0                                      | N                                   |
| LAD1         | 0.862659115                            | N                                            | 1                                      | N                                   |
| TNS1         | 0.862659115                            | N                                            | 3                                      | N                                   |
| AC023794.5   | 0.862787422                            | N                                            | 0                                      | N                                   |
| HEATR6       | 0.862799996                            | N                                            | 0                                      | N                                   |
| ANKRD7       | 0.862817044                            | N                                            | 0                                      | N                                   |
| AC018797.2   | 0.862883404                            | N                                            | 0                                      | N                                   |
| LINC00896    | 0.862883404                            | N                                            | 0                                      | N                                   |
| MCFD2        | 0.862883404                            | N                                            | 0                                      | N                                   |
| NPFFR1       | 0.862903884                            | N                                            | 0                                      | N                                   |
| ZFP64        | 0.862903884                            | N                                            | 0                                      | N                                   |
| AC006213.1   | 0.862908868                            | N                                            | 0                                      | N                                   |
| AC108463.3   | 0.862908868                            | N                                            | 0                                      | N                                   |
| SHISA6       | 0.862928048                            | N                                            | 0                                      | N                                   |
| ADAM19       | 0.863049971                            | N                                            | 2                                      | N                                   |
| ZSWIM2       | 0.863060946                            | N                                            | 0                                      | N                                   |

| Gene symbols | FDR (differential expression analysis) | Differentially expressed gene? Y, Yes; N, No | Number of insulin related publications | Insulin related gene? Y, Yes; N, No |
|--------------|----------------------------------------|----------------------------------------------|----------------------------------------|-------------------------------------|
| AC104964.3   | 0.863149794                            | N                                            | 0                                      | N                                   |
| RNF141       | 0.863149794                            | N                                            | 0                                      | N                                   |
| AC092568.1   | 0.863153387                            | N                                            | 0                                      | N                                   |
| AC027682.4   | 0.863154291                            | N                                            | 0                                      | N                                   |
| RPL23AP42    | 0.863154291                            | N                                            | 0                                      | N                                   |
| CHCHD3P2     | 0.863181714                            | N                                            | 0                                      | N                                   |
| CHMP6        | 0.863181714                            | N                                            | 0                                      | N                                   |
| CNRIP1       | 0.863181714                            | N                                            | 0                                      | N                                   |
| LINC00501    | 0.863181714                            | N                                            | 0                                      | N                                   |
| LINC02547    | 0.863181714                            | N                                            | 0                                      | N                                   |
| MCRIP2P1     | 0.863181714                            | N                                            | 0                                      | N                                   |
| TXNDC17      | 0.863181714                            | N                                            | 4                                      | N                                   |
| AC092611.3   | 0.86321385                             | N                                            | 0                                      | N                                   |
| AC004832.5   | 0.863358164                            | N                                            | 0                                      | N                                   |
| AC006026.1   | 0.863358164                            | N                                            | 0                                      | N                                   |
| AC008758.1   | 0.863358164                            | N                                            | 0                                      | N                                   |
| AC013403.2   | 0.863358164                            | N                                            | 0                                      | N                                   |
| AC118282.4   | 0.863358164                            | N                                            | 0                                      | N                                   |
| CSNK1G2      | 0.863358164                            | N                                            | 0                                      | N                                   |
| DNAJC11      | 0.863358164                            | N                                            | 0                                      | N                                   |
| ZFP30        | 0.863358164                            | N                                            | 0                                      | N                                   |
| HABP4        | 0.86342665                             | N                                            | 0                                      | N                                   |
| LIMK2        | 0.86342665                             | N                                            | 2                                      | N                                   |
| MAK          | 0.86342665                             | N                                            | 141                                    | Y                                   |
| ZNF90P1      | 0.86342665                             | N                                            | 0                                      | N                                   |
| SH2D6        | 0.863493661                            | N                                            | 0                                      | N                                   |
| DGCR6        | 0.863502411                            | N                                            | 0                                      | N                                   |
| NGF          | 0.863502411                            | N                                            | 523                                    | Y                                   |
| XKR4         | 0.863502411                            | N                                            | 0                                      | N                                   |
| AC068790.4   | 0.863594491                            | N                                            | 0                                      | N                                   |
| TRAPPC5      | 0.863615887                            | N                                            | 0                                      | N                                   |
| FAM189B      | 0.863618458                            | N                                            | 0                                      | N                                   |
| IPO5         | 0.863618458                            | N                                            | 0                                      | N                                   |
| KLKB1        | 0.863618458                            | N                                            | 1                                      | N                                   |
| SMIM30       | 0.863618458                            | N                                            | 0                                      | N                                   |
| ULK1         | 0.863618458                            | N                                            | 57                                     | N                                   |
| PRDX3P2      | 0.863629518                            | N                                            | 0                                      | N                                   |
| PEX1         | 0.863629573                            | N                                            | 1                                      | N                                   |
| PROSER2      | 0.863719705                            | N                                            | 0                                      | N                                   |
| PSMA2P3      | 0.863780256                            | N                                            | 0                                      | N                                   |
| AL512631.1   | 0.863785899                            | N                                            | 0                                      | N                                   |
| STARD4       | 0.864114623                            | N                                            | 1                                      | N                                   |
| F12          | 0.864173443                            | N                                            | 273                                    | Y                                   |
| DLGAP4       | 0.864232391                            | N                                            | 0                                      | N                                   |
| PRPF19       | 0.864232391                            | N                                            | 1                                      | N                                   |
| AP003467.2   | 0.864271299                            | N                                            | 0                                      | N                                   |
| SNHG17       | 0.864271299                            | N                                            | 0                                      | N                                   |
| MYCBP2-AS2   | 0.864272238                            | N                                            | 0                                      | N                                   |
| AL008987.1   | 0.86428313                             | N                                            | 0                                      | N                                   |
| CASP8        | 0.86428313                             | N                                            | 64                                     | N                                   |
| GGT1         | 0.86428313                             | N                                            | 6                                      | N                                   |
| PPP1R9A      | 0.86428313                             | N                                            | 1                                      | N                                   |
| LDHAP7       | 0.864286349                            | N                                            | 0                                      | N                                   |
| AP004147.1   | 0.86439552                             | N                                            | 0                                      | N                                   |
| AL353662.1   | 0.86457169                             | N                                            | 0                                      | N                                   |
| AXDND1       | 0.86457169                             | N                                            | 0                                      | N                                   |
| LINC02084    | 0.86458835                             | N                                            | 0                                      | N                                   |
| AC015712.2   | 0.86460513                             | N                                            | 0                                      | N                                   |
| ZNF197-AS1   | 0.86460513                             | N                                            | 0                                      | N                                   |
| AC022167.2   | 0.864707669                            | N                                            | 0                                      | N                                   |
| ARL5A        | 0.864707669                            | N                                            | 0                                      | N                                   |
| IL10RA       | 0.864707669                            | N                                            | 1                                      | N                                   |
| LINC00467    | 0.864707669                            | N                                            | 1                                      | N                                   |
| RAB11FIP4    | 0.864707669                            | N                                            | 1                                      | N                                   |
| AC005224.1   | 0.864713779                            | N                                            | 0                                      | N                                   |
| AC112722.1   | 0.864844039                            | N                                            | 0                                      | N                                   |

| Gene symbols | FDR (differential expression analysis) | Differentially expressed gene? Y, Yes; N, No | Number of insulin related publications | Insulin related gene? Y, Yes; N, No |
|--------------|----------------------------------------|----------------------------------------------|----------------------------------------|-------------------------------------|
| GJD3         | 0.864844039                            | N                                            | 0                                      | N                                   |
| RPS5         | 0.864844039                            | N                                            | 0                                      | N                                   |
| FITM1        | 0.864869832                            | N                                            | 1                                      | N                                   |
| CBX6         | 0.864933197                            | N                                            | 0                                      | N                                   |
| AL512594.1   | 0.864994577                            | N                                            | 0                                      | N                                   |
| NIM1K        | 0.865161165                            | N                                            | 0                                      | N                                   |
| TPD52        | 0.865161165                            | N                                            | 1                                      | N                                   |
| STAM2        | 0.865601109                            | N                                            | 1                                      | N                                   |
| ADGRE2       | 0.865647252                            | N                                            | 0                                      | N                                   |
| CERK         | 0.865810109                            | N                                            | 4                                      | N                                   |
| SNX19P1      | 0.865820521                            | N                                            | 0                                      | N                                   |
| AC098592.2   | 0.865861391                            | N                                            | 0                                      | N                                   |
| AP000756.2   | 0.865861391                            | N                                            | 0                                      | N                                   |
| CA9          | 0.865861391                            | N                                            | 11                                     | N                                   |
| DHCR24       | 0.865861391                            | N                                            | 14                                     | N                                   |
| KRT42P       | 0.865861391                            | N                                            | 0                                      | N                                   |
| MKRN3        | 0.865861391                            | N                                            | 3                                      | N                                   |
| MPP1         | 0.865861391                            | N                                            | 1                                      | N                                   |
| PLEKHB1      | 0.865861391                            | N                                            | 0                                      | N                                   |
| RHOBTB2      | 0.865861391                            | N                                            | 0                                      | N                                   |
| SPCS2        | 0.865861391                            | N                                            | 0                                      | N                                   |
| AC004969.1   | 0.865909453                            | N                                            | 0                                      | N                                   |
| AC132068.1   | 0.865909453                            | N                                            | 0                                      | N                                   |
| ATG4D        | 0.865909453                            | N                                            | 0                                      | N                                   |
| HOXB3        | 0.865909453                            | N                                            | 3                                      | N                                   |
| MRPL22       | 0.865909453                            | N                                            | 0                                      | N                                   |
| NOD1         | 0.865909453                            | N                                            | 31                                     | N                                   |
| AC009163.7   | 0.865990442                            | N                                            | 0                                      | N                                   |
| AL359915.2   | 0.865990442                            | N                                            | 0                                      | N                                   |
| ERN2         | 0.865990442                            | N                                            | 27                                     | N                                   |
| ESS2         | 0.865990442                            | N                                            | 0                                      | N                                   |
| NRP2         | 0.865990442                            | N                                            | 5                                      | N                                   |
| POLR2J3      | 0.865990442                            | N                                            | 0                                      | N                                   |
| YPEL4        | 0.865990442                            | N                                            | 0                                      | N                                   |
| AC026786.1   | 0.866062879                            | N                                            | 0                                      | N                                   |
| GALNT2       | 0.866062879                            | N                                            | 5                                      | N                                   |
| ANGPT4       | 0.86608814                             | N                                            | 5                                      | N                                   |
| C10orf76     | 0.86608814                             | N                                            | 0                                      | N                                   |
| CD81-AS1     | 0.86608814                             | N                                            | 0                                      | N                                   |
| CHMP5        | 0.86608814                             | N                                            | 0                                      | N                                   |
| ABCD3        | 0.866100434                            | N                                            | 1                                      | N                                   |
| AL591503.3   | 0.866100434                            | N                                            | 0                                      | N                                   |
| MAPK8IP3     | 0.866100434                            | N                                            | 3                                      | N                                   |
| RUFY2        | 0.866100434                            | N                                            | 0                                      | N                                   |
| AC005775.1   | 0.866225129                            | N                                            | 0                                      | N                                   |
| AC025423.1   | 0.866225129                            | N                                            | 0                                      | N                                   |
| CYP20A1      | 0.866225129                            | N                                            | 0                                      | N                                   |
| LBX1         | 0.866225129                            | N                                            | 1                                      | N                                   |
| SLC25A14P1   | 0.866225129                            | N                                            | 0                                      | N                                   |
| TFAP2B       | 0.866225129                            | N                                            | 7                                      | N                                   |
| ZBTB49       | 0.866225129                            | N                                            | 0                                      | N                                   |
| AC011468.4   | 0.866227348                            | N                                            | 0                                      | N                                   |
| CCDC24       | 0.866227348                            | N                                            | 0                                      | N                                   |
| PLA2G7       | 0.866227348                            | N                                            | 10                                     | N                                   |
| CYB561D1     | 0.86623996                             | N                                            | 0                                      | N                                   |
| MMP17        | 0.86623996                             | N                                            | 1                                      | N                                   |
| SFT2D1       | 0.86623996                             | N                                            | 0                                      | N                                   |
| TXNDC9       | 0.86623996                             | N                                            | 0                                      | N                                   |
| AC107385.1   | 0.866417414                            | N                                            | 0                                      | N                                   |
| XYLT1        | 0.866477088                            | N                                            | 1                                      | N                                   |
| DDX3X        | 0.866544695                            | N                                            | 2                                      | N                                   |
| MAP3K14      | 0.866544695                            | N                                            | 3                                      | N                                   |
| TMEM9        | 0.866544695                            | N                                            | 0                                      | N                                   |
| MED17        | 0.86663249                             | N                                            | 1                                      | N                                   |
| ZNF562       | 0.866663911                            | N                                            | 0                                      | N                                   |
| CHD5         | 0.866674067                            | N                                            | 2                                      | N                                   |

| Gene symbols | FDR (differential expression analysis) | Differentially expressed gene? Y, Yes; N, No | Number of insulin related publications | Insulin related gene? Y, Yes; N, No |
|--------------|----------------------------------------|----------------------------------------------|----------------------------------------|-------------------------------------|
| PRKCH        | 0.866674067                            | N                                            | 1                                      | N                                   |
| KCNN1        | 0.866717514                            | N                                            | 2                                      | N                                   |
| ADO          | 0.866721648                            | N                                            | 36                                     | N                                   |
| EPHA2        | 0.866721648                            | N                                            | 11                                     | N                                   |
| GRIP1        | 0.866721648                            | N                                            | 3                                      | N                                   |
| NINL         | 0.866721648                            | N                                            | 0                                      | N                                   |
| PHLPP2       | 0.866721648                            | N                                            | 11                                     | N                                   |
| SLC35A2      | 0.866721648                            | N                                            | 1                                      | N                                   |
| STX2         | 0.866721648                            | N                                            | 0                                      | N                                   |
| UBE2E3       | 0.866721648                            | N                                            | 1                                      | N                                   |
| KIFC2        | 0.866811467                            | N                                            | 0                                      | N                                   |
| WASHC5       | 0.866865869                            | N                                            | 0                                      | N                                   |
| TXNRD2       | 0.86694539                             | N                                            | 4                                      | N                                   |
| AC096536.1   | 0.866954994                            | N                                            | 0                                      | N                                   |
| AFMID        | 0.866954994                            | N                                            | 2                                      | N                                   |
| ALDOA        | 0.866954994                            | N                                            | 5                                      | N                                   |
| CFB          | 0.866954994                            | N                                            | 13                                     | N                                   |
| CYP4F8       | 0.866954994                            | N                                            | 0                                      | N                                   |
| FAM92A       | 0.866954994                            | N                                            | 0                                      | N                                   |
| SRP14-AS1    | 0.866954994                            | N                                            | 0                                      | N                                   |
| TRIP11       | 0.866954994                            | N                                            | 0                                      | N                                   |
| AL049610.1   | 0.866973921                            | N                                            | 0                                      | N                                   |
| LINC00894    | 0.866973921                            | N                                            | 0                                      | N                                   |
| LINC01725    | 0.866973921                            | N                                            | 0                                      | N                                   |
| OGFRP1       | 0.866973921                            | N                                            | 0                                      | N                                   |
| PMS2         | 0.866973921                            | N                                            | 1                                      | N                                   |
| PROSER1      | 0.866973921                            | N                                            | 0                                      | N                                   |
| MARCH2       | 0.866991491                            | N                                            | 0                                      | N                                   |
| FDPSP5       | 0.866998515                            | N                                            | 0                                      | N                                   |
| GSG1L        | 0.866998515                            | N                                            | 0                                      | N                                   |
| FBXW4        | 0.867089082                            | N                                            | 0                                      | N                                   |
| AVEN         | 0.867224896                            | N                                            | 1                                      | N                                   |
| RPL32P3      | 0.867224896                            | N                                            | 0                                      | N                                   |
| OCLM         | 0.867231181                            | N                                            | 0                                      | N                                   |
| FARSB        | 0.867238895                            | N                                            | 1                                      | N                                   |
| KCNC2        | 0.867238895                            | N                                            | 2                                      | N                                   |
| AC092653.1   | 0.867453242                            | N                                            | 0                                      | N                                   |
| C3           | 0.867453242                            | N                                            | 653                                    | Y                                   |
| CAMTA1       | 0.867453242                            | N                                            | 6                                      | N                                   |
| SAMD11       | 0.867453242                            | N                                            | 0                                      | N                                   |
| KBTBD12      | 0.867488665                            | N                                            | 0                                      | N                                   |
| DHRS2        | 0.867518855                            | N                                            | 0                                      | N                                   |
| WT1-AS       | 0.867525591                            | N                                            | 2                                      | N                                   |
| AC011921.3   | 0.867582257                            | N                                            | 0                                      | N                                   |
| GOLIM4       | 0.867582257                            | N                                            | 0                                      | N                                   |
| GSC          | 0.867612518                            | N                                            | 41                                     | N                                   |
| TARS         | 0.867612518                            | N                                            | 2                                      | N                                   |
| AC023389.2   | 0.867627336                            | N                                            | 0                                      | N                                   |
| AC092620.3   | 0.867627336                            | N                                            | 0                                      | N                                   |
| AC007216.4   | 0.867650935                            | N                                            | 0                                      | N                                   |
| AC021087.3   | 0.867650935                            | N                                            | 0                                      | N                                   |
| AC068888.2   | 0.867650935                            | N                                            | 0                                      | N                                   |
| AC107953.1   | 0.867650935                            | N                                            | 0                                      | N                                   |
| FAXC         | 0.867650935                            | N                                            | 0                                      | N                                   |
| KRIT1        | 0.867650935                            | N                                            | 2                                      | N                                   |
| OR4F13P      | 0.867650935                            | N                                            | 0                                      | N                                   |
| RN7SL672P    | 0.867650935                            | N                                            | 0                                      | N                                   |
| SHANK2       | 0.867650935                            | N                                            | 2                                      | N                                   |
| SLC18A3      | 0.867650935                            | N                                            | 8                                      | N                                   |
| HEXA-AS1     | 0.867660312                            | N                                            | 0                                      | N                                   |
| BICDL1       | 0.86768115                             | N                                            | 0                                      | N                                   |
| HSPBP1       | 0.86768115                             | N                                            | 0                                      | N                                   |
| PCBP1        | 0.86768115                             | N                                            | 2                                      | N                                   |
| PTP4A2       | 0.86768115                             | N                                            | 0                                      | N                                   |
| RPRD1A       | 0.86768115                             | N                                            | 0                                      | N                                   |
| WWTR1-AS1    | 0.86776512                             | N                                            | 0                                      | N                                   |

| Gene symbols | FDR (differential expression analysis) | Differentially expressed gene? Y, Yes; N, No | Number of insulin related publications | Insulin related gene? Y, Yes; N, No |
|--------------|----------------------------------------|----------------------------------------------|----------------------------------------|-------------------------------------|
| AC024587.1   | 0.867775984                            | N                                            | 0                                      | N                                   |
| AC120057.4   | 0.867775984                            | N                                            | 0                                      | N                                   |
| RABL3        | 0.867775984                            | N                                            | 0                                      | N                                   |
| TINF2        | 0.867775984                            | N                                            | 2                                      | N                                   |
| WDR43        | 0.867775984                            | N                                            | 0                                      | N                                   |
| ZNF529-AS1   | 0.867775984                            | N                                            | 0                                      | N                                   |
| NUP153       | 0.867965436                            | N                                            | 1                                      | N                                   |
| AC015971.1   | 0.868045144                            | N                                            | 0                                      | N                                   |
| CNGA1        | 0.868142245                            | N                                            | 3                                      | N                                   |
| TSPAN18      | 0.86826516                             | N                                            | 1                                      | N                                   |
| LINC00630    | 0.868374347                            | N                                            | 0                                      | N                                   |
| IRAK1BP1     | 0.868398052                            | N                                            | 0                                      | N                                   |
| KIN          | 0.868398052                            | N                                            | 146                                    | Y                                   |
| LINC00596    | 0.868398052                            | N                                            | 0                                      | N                                   |
| SYT11        | 0.868398052                            | N                                            | 3                                      | N                                   |
| AC006033.2   | 0.868460619                            | N                                            | 0                                      | N                                   |
| AC021205.3   | 0.868460619                            | N                                            | 0                                      | N                                   |
| AC034229.2   | 0.868460619                            | N                                            | 0                                      | N                                   |
| FASTKD3      | 0.868460619                            | N                                            | 0                                      | N                                   |
| FBXO27       | 0.868460619                            | N                                            | 0                                      | N                                   |
| HAX1         | 0.868460619                            | N                                            | 0                                      | N                                   |
| MRFAP1L1     | 0.868460619                            | N                                            | 0                                      | N                                   |
| PITPNC1      | 0.868491111                            | N                                            | 1                                      | N                                   |
| SLCS1A       | 0.868515589                            | N                                            | 0                                      | N                                   |
| SLC37A1      | 0.868633265                            | N                                            | 0                                      | N                                   |
| CREBBP       | 0.868691676                            | N                                            | 50                                     | N                                   |
| FUNDC2P1     | 0.868691676                            | N                                            | 0                                      | N                                   |
| GOLGA3       | 0.868691676                            | N                                            | 1                                      | N                                   |
| IPO13        | 0.868691676                            | N                                            | 0                                      | N                                   |
| MPND         | 0.868691676                            | N                                            | 0                                      | N                                   |
| RBBP4        | 0.868691676                            | N                                            | 4                                      | N                                   |
| AC087499.1   | 0.868697328                            | N                                            | 0                                      | N                                   |
| SCIMP        | 0.868697328                            | N                                            | 0                                      | N                                   |
| NCLN         | 0.868768885                            | N                                            | 1                                      | N                                   |
| ACP7         | 0.868800798                            | N                                            | 0                                      | N                                   |
| AC002524.1   | 0.868811718                            | N                                            | 0                                      | N                                   |
| AC009977.1   | 0.868811718                            | N                                            | 0                                      | N                                   |
| ARHGAP23     | 0.868811718                            | N                                            | 0                                      | N                                   |
| BORCS6       | 0.868811718                            | N                                            | 0                                      | N                                   |
| EIF2AK2      | 0.868811718                            | N                                            | 6                                      | N                                   |
| EPN1         | 0.868811718                            | N                                            | 0                                      | N                                   |
| FAM76A       | 0.868811718                            | N                                            | 0                                      | N                                   |
| HNRNPKP2     | 0.868811718                            | N                                            | 0                                      | N                                   |
| KMT5C        | 0.868811718                            | N                                            | 0                                      | N                                   |
| NDUFA11      | 0.868811718                            | N                                            | 0                                      | N                                   |
| P3H3         | 0.868811718                            | N                                            | 0                                      | N                                   |
| PPP1R16A     | 0.868811718                            | N                                            | 0                                      | N                                   |
| TROVE2       | 0.868811718                            | N                                            | 0                                      | N                                   |
| TNIP1        | 0.868847896                            | N                                            | 3                                      | N                                   |
| AC006270.2   | 0.868876175                            | N                                            | 0                                      | N                                   |
| CLUHP3       | 0.868876175                            | N                                            | 0                                      | N                                   |
| AC073848.1   | 0.868903308                            | N                                            | 0                                      | N                                   |
| AC006210.2   | 0.868933614                            | N                                            | 0                                      | N                                   |
| ACP6         | 0.868933614                            | N                                            | 0                                      | N                                   |
| AL022328.4   | 0.868933614                            | N                                            | 0                                      | N                                   |
| AC087392.4   | 0.868989359                            | N                                            | 0                                      | N                                   |
| LUC7L3       | 0.868989359                            | N                                            | 1                                      | N                                   |
| AC112255.1   | 0.869053302                            | N                                            | 0                                      | N                                   |
| MYTIL        | 0.869115613                            | N                                            | 4                                      | N                                   |
| ZKSCAN3      | 0.869176431                            | N                                            | 1                                      | N                                   |
| TNIK         | 0.869250032                            | N                                            | 0                                      | N                                   |
| AC069262.1   | 0.86925132                             | N                                            | 0                                      | N                                   |
| AC063950.1   | 0.869333665                            | N                                            | 0                                      | N                                   |
| AMN          | 0.869333665                            | N                                            | 8                                      | N                                   |
| NDUFV2       | 0.869333665                            | N                                            | 2                                      | N                                   |
| ARL6         | 0.869376736                            | N                                            | 1                                      | N                                   |

| Gene symbols | FDR (differential expression analysis) | Differentially expressed gene? Y, Yes; N, No | Number of insulin related publications | Insulin related gene? Y, Yes; N, No |
|--------------|----------------------------------------|----------------------------------------------|----------------------------------------|-------------------------------------|
| TTC9C        | 0.869376736                            | N                                            | 0                                      | N                                   |
| AL135905.2   | 0.869390647                            | N                                            | 0                                      | N                                   |
| KPNA1        | 0.869390647                            | N                                            | 0                                      | N                                   |
| AC004554.1   | 0.869401222                            | N                                            | 0                                      | N                                   |
| OR5P2        | 0.869401222                            | N                                            | 0                                      | N                                   |
| PPP1R14BP3   | 0.869401222                            | N                                            | 0                                      | N                                   |
| AC116351.1   | 0.86955178                             | N                                            | 0                                      | N                                   |
| ARHGAP27     | 0.86955178                             | N                                            | 0                                      | N                                   |
| HMGN1P8      | 0.86955178                             | N                                            | 0                                      | N                                   |
| PIWIL3       | 0.86955178                             | N                                            | 0                                      | N                                   |
| SEMA4C       | 0.869600128                            | N                                            | 0                                      | N                                   |
| AC009779.3   | 0.869617362                            | N                                            | 0                                      | N                                   |
| AC012557.1   | 0.869617362                            | N                                            | 0                                      | N                                   |
| AC072061.1   | 0.869706103                            | N                                            | 0                                      | N                                   |
| AC090825.1   | 0.869706103                            | N                                            | 0                                      | N                                   |
| AC105150.1   | 0.869706103                            | N                                            | 0                                      | N                                   |
| ALDH1A3      | 0.869706103                            | N                                            | 10                                     | N                                   |
| CCNE1        | 0.869706103                            | N                                            | 8                                      | N                                   |
| RFKP1        | 0.869706103                            | N                                            | 0                                      | N                                   |
| TRAFD1       | 0.869706103                            | N                                            | 0                                      | N                                   |
| CLDN10       | 0.869822296                            | N                                            | 1                                      | N                                   |
| BOLA2P1      | 0.869897901                            | N                                            | 0                                      | N                                   |
| STK33        | 0.869897901                            | N                                            | 1                                      | N                                   |
| ELL3         | 0.869978835                            | N                                            | 0                                      | N                                   |
| GAS2         | 0.869978835                            | N                                            | 2                                      | N                                   |
| WDR82P2      | 0.869978835                            | N                                            | 0                                      | N                                   |
| ZNF671       | 0.869978835                            | N                                            | 0                                      | N                                   |
| PTN          | 0.870030611                            | N                                            | 19                                     | N                                   |
| RNASET2      | 0.87005978                             | N                                            | 0                                      | N                                   |
| FAM98C       | 0.870069445                            | N                                            | 0                                      | N                                   |
| NFXL1        | 0.870148763                            | N                                            | 0                                      | N                                   |
| TFEB         | 0.870148763                            | N                                            | 26                                     | N                                   |
| AC025031.3   | 0.870315435                            | N                                            | 0                                      | N                                   |
| ZNF513       | 0.870349611                            | N                                            | 0                                      | N                                   |
| THADA        | 0.870359936                            | N                                            | 32                                     | N                                   |
| AC079601.2   | 0.870364145                            | N                                            | 0                                      | N                                   |
| AC097527.1   | 0.870364145                            | N                                            | 0                                      | N                                   |
| FUT4         | 0.870364145                            | N                                            | 1                                      | N                                   |
| HADHAP1      | 0.870364145                            | N                                            | 0                                      | N                                   |
| PTPA         | 0.870364145                            | N                                            | 0                                      | N                                   |
| TOR1B        | 0.870364145                            | N                                            | 0                                      | N                                   |
| GAB2         | 0.870436797                            | N                                            | 21                                     | N                                   |
| BMPER        | 0.870462607                            | N                                            | 0                                      | N                                   |
| RALB         | 0.870635338                            | N                                            | 3                                      | N                                   |
| AC019171.1   | 0.870829436                            | N                                            | 0                                      | N                                   |
| AC091390.4   | 0.870829436                            | N                                            | 0                                      | N                                   |
| AICDA        | 0.870829436                            | N                                            | 5                                      | N                                   |
| AL356432.3   | 0.870829436                            | N                                            | 0                                      | N                                   |
| AP001258.1   | 0.870829436                            | N                                            | 0                                      | N                                   |
| BCL11B       | 0.870829436                            | N                                            | 0                                      | N                                   |
| BTN2A2       | 0.870829436                            | N                                            | 0                                      | N                                   |
| CCDC88B      | 0.870829436                            | N                                            | 0                                      | N                                   |
| CDK19        | 0.870829436                            | N                                            | 1                                      | N                                   |
| CTXND1       | 0.870829436                            | N                                            | 0                                      | N                                   |
| FZD3         | 0.870829436                            | N                                            | 7                                      | N                                   |
| GMCL1P1      | 0.870829436                            | N                                            | 0                                      | N                                   |
| HTN3         | 0.870829436                            | N                                            | 2                                      | N                                   |
| IFIT3        | 0.870829436                            | N                                            | 3                                      | N                                   |
| KAT6B        | 0.870829436                            | N                                            | 2                                      | N                                   |
| LAX1         | 0.870829436                            | N                                            | 0                                      | N                                   |
| MAST3        | 0.870829436                            | N                                            | 0                                      | N                                   |
| PACERR       | 0.870829436                            | N                                            | 0                                      | N                                   |
| RBBP9        | 0.870829436                            | N                                            | 0                                      | N                                   |
| UBA1         | 0.870829436                            | N                                            | 2                                      | N                                   |
| ZNF146       | 0.870829436                            | N                                            | 0                                      | N                                   |
| AC108058.1   | 0.870927552                            | N                                            | 0                                      | N                                   |

| Gene symbols | FDR (differential expression analysis) | Differentially expressed gene? Y, Yes; N, No | Number of insulin related publications | Insulin related gene? Y, Yes; N, No |
|--------------|----------------------------------------|----------------------------------------------|----------------------------------------|-------------------------------------|
| AC133963.1   | 0.870927552                            | N                                            | 0                                      | N                                   |
| AL117190.1   | 0.871153265                            | N                                            | 0                                      | N                                   |
| ANXA13       | 0.871153265                            | N                                            | 0                                      | N                                   |
| AC141928.1   | 0.871212765                            | N                                            | 0                                      | N                                   |
| ARFGAP1      | 0.871265469                            | N                                            | 0                                      | N                                   |
| AC007237.1   | 0.871353207                            | N                                            | 0                                      | N                                   |
| AC026367.3   | 0.871353207                            | N                                            | 0                                      | N                                   |
| CBX4         | 0.871353207                            | N                                            | 0                                      | N                                   |
| CDC42P6      | 0.871353207                            | N                                            | 0                                      | N                                   |
| FAN1         | 0.871353207                            | N                                            | 0                                      | N                                   |
| KLHL11       | 0.871353207                            | N                                            | 0                                      | N                                   |
| NAA50        | 0.871353207                            | N                                            | 0                                      | N                                   |
| PPHLN1       | 0.871353207                            | N                                            | 0                                      | N                                   |
| TBC1D29      | 0.871353207                            | N                                            | 0                                      | N                                   |
| AC118465.1   | 0.871432398                            | N                                            | 0                                      | N                                   |
| BIRC3        | 0.871432398                            | N                                            | 9                                      | N                                   |
| CNKSR1       | 0.871432398                            | N                                            | 1                                      | N                                   |
| GSN-AS1      | 0.871432398                            | N                                            | 0                                      | N                                   |
| PRKACA       | 0.871432398                            | N                                            | 4                                      | N                                   |
| CD300LG      | 0.87158257                             | N                                            | 1                                      | N                                   |
| CYP2W1       | 0.87158257                             | N                                            | 0                                      | N                                   |
| AC005412.1   | 0.871582734                            | N                                            | 0                                      | N                                   |
| AC027088.4   | 0.871582734                            | N                                            | 0                                      | N                                   |
| AP002833.3   | 0.871582734                            | N                                            | 0                                      | N                                   |
| APOOP5       | 0.871582734                            | N                                            | 0                                      | N                                   |
| B3GALNT1     | 0.871582734                            | N                                            | 0                                      | N                                   |
| CDHR5        | 0.871582734                            | N                                            | 0                                      | N                                   |
| CNIH1        | 0.871582734                            | N                                            | 0                                      | N                                   |
| EHD3         | 0.871582734                            | N                                            | 2                                      | N                                   |
| GIGYF1       | 0.871582734                            | N                                            | 2                                      | N                                   |
| KIF16B       | 0.871582734                            | N                                            | 0                                      | N                                   |
| LINC00426    | 0.871582734                            | N                                            | 0                                      | N                                   |
| LPXN         | 0.871582734                            | N                                            | 0                                      | N                                   |
| PANO1        | 0.871582734                            | N                                            | 0                                      | N                                   |
| PLXNA3       | 0.871582734                            | N                                            | 1                                      | N                                   |
| PTPRVP       | 0.871582734                            | N                                            | 0                                      | N                                   |
| RN7SL81P     | 0.871582734                            | N                                            | 0                                      | N                                   |
| SLC30A6      | 0.871582734                            | N                                            | 1                                      | N                                   |
| AC018554.1   | 0.871638454                            | N                                            | 0                                      | N                                   |
| AC106760.2   | 0.871638454                            | N                                            | 0                                      | N                                   |
| ADAMTSL4     | 0.871638454                            | N                                            | 1                                      | N                                   |
| BTBD2        | 0.871638454                            | N                                            | 0                                      | N                                   |
| CD180        | 0.871638454                            | N                                            | 2                                      | N                                   |
| CD81         | 0.871638454                            | N                                            | 19                                     | N                                   |
| DNAAF5       | 0.871638454                            | N                                            | 0                                      | N                                   |
| FAU          | 0.871638454                            | N                                            | 25                                     | N                                   |
| LINC00482    | 0.871638454                            | N                                            | 0                                      | N                                   |
| SLC19A3      | 0.871638454                            | N                                            | 1                                      | N                                   |
| SPATA2L      | 0.871638454                            | N                                            | 0                                      | N                                   |
| TM4SF19      | 0.871638454                            | N                                            | 0                                      | N                                   |
| UNC45A       | 0.8716461                              | N                                            | 0                                      | N                                   |
| FAM103A1     | 0.871732831                            | N                                            | 0                                      | N                                   |
| XPO7         | 0.871732831                            | N                                            | 0                                      | N                                   |
| CNKSR2       | 0.871974728                            | N                                            | 1                                      | N                                   |
| F7           | 0.872055458                            | N                                            | 29                                     | N                                   |
| PRADC1P1     | 0.872055458                            | N                                            | 0                                      | N                                   |
| WNT10A       | 0.872055458                            | N                                            | 5                                      | N                                   |
| RPL7AP50     | 0.872108994                            | N                                            | 0                                      | N                                   |
| CFLIP1       | 0.872273515                            | N                                            | 0                                      | N                                   |
| AF129075.1   | 0.872455312                            | N                                            | 0                                      | N                                   |
| BCOR         | 0.872455312                            | N                                            | 4                                      | N                                   |
| NTSR1        | 0.872455312                            | N                                            | 5                                      | N                                   |
| NUMA1        | 0.872455312                            | N                                            | 2                                      | N                                   |
| PHF10        | 0.872455312                            | N                                            | 0                                      | N                                   |
| RPP38        | 0.872455312                            | N                                            | 0                                      | N                                   |
| SOX6         | 0.872455312                            | N                                            | 16                                     | N                                   |



| Gene symbols | FDR (differential expression analysis) | Differentially expressed gene? Y, Yes; N, No | Number of insulin related publications | Insulin related gene? Y, Yes; N, No |
|--------------|----------------------------------------|----------------------------------------------|----------------------------------------|-------------------------------------|
| LINC00471    | 0.872611254                            | N                                            | 0                                      | N                                   |
| MAP3K7CL     | 0.872611254                            | N                                            | 0                                      | N                                   |
| ZNF385B      | 0.872611254                            | N                                            | 0                                      | N                                   |
| AC005050.1   | 0.872734691                            | N                                            | 0                                      | N                                   |
| PHC1P1       | 0.872734691                            | N                                            | 0                                      | N                                   |
| STPG1        | 0.872734691                            | N                                            | 0                                      | N                                   |
| AC084125.2   | 0.87302076                             | N                                            | 0                                      | N                                   |
| ADCY10P1     | 0.87302076                             | N                                            | 0                                      | N                                   |
| COL1A1       | 0.87302076                             | N                                            | 72                                     | N                                   |
| GPR89A       | 0.87302076                             | N                                            | 0                                      | N                                   |
| ADRB3        | 0.873323461                            | N                                            | 82                                     | N                                   |
| MAP2K6       | 0.873323461                            | N                                            | 12                                     | N                                   |
| PXYLP1       | 0.873323461                            | N                                            | 0                                      | N                                   |
| RMRP         | 0.873323461                            | N                                            | 2                                      | N                                   |
| TLE1         | 0.873323461                            | N                                            | 6                                      | N                                   |
| TNK2         | 0.873323461                            | N                                            | 2                                      | N                                   |
| FAM76B       | 0.87342231                             | N                                            | 0                                      | N                                   |
| LRFN1        | 0.873457045                            | N                                            | 0                                      | N                                   |
| AQR          | 0.873628408                            | N                                            | 3                                      | N                                   |
| ASNSP6       | 0.873628408                            | N                                            | 0                                      | N                                   |
| ATP1B3P1     | 0.873628408                            | N                                            | 0                                      | N                                   |
| C21orf62-AS1 | 0.873628408                            | N                                            | 0                                      | N                                   |
| DHX36        | 0.873628408                            | N                                            | 0                                      | N                                   |
| GTF2B        | 0.873628408                            | N                                            | 0                                      | N                                   |
| KTN1         | 0.873628408                            | N                                            | 1                                      | N                                   |
| NUTF2P2      | 0.873628408                            | N                                            | 0                                      | N                                   |
| TSPAN3       | 0.873628408                            | N                                            | 0                                      | N                                   |
| TUT1         | 0.873628408                            | N                                            | 0                                      | N                                   |
| UBTD1        | 0.873628408                            | N                                            | 0                                      | N                                   |
| ZNF16        | 0.873628408                            | N                                            | 0                                      | N                                   |
| AL353746.1   | 0.873647237                            | N                                            | 0                                      | N                                   |
| COLGALT1     | 0.873829326                            | N                                            | 0                                      | N                                   |
| GUSBP2       | 0.873966958                            | N                                            | 0                                      | N                                   |
| AC089984.3   | 0.874012508                            | N                                            | 0                                      | N                                   |
| ENTPD1       | 0.874012508                            | N                                            | 2                                      | N                                   |
| HNF4A        | 0.874012508                            | N                                            | 282                                    | Y                                   |
| AC009127.2   | 0.874107937                            | N                                            | 0                                      | N                                   |
| AC009133.5   | 0.874107937                            | N                                            | 0                                      | N                                   |
| AC113615.1   | 0.874107937                            | N                                            | 0                                      | N                                   |
| AC123595.1   | 0.874107937                            | N                                            | 0                                      | N                                   |
| FAM49A       | 0.874107937                            | N                                            | 0                                      | N                                   |
| GDNF         | 0.874107937                            | N                                            | 158                                    | Y                                   |
| GPR27        | 0.874107937                            | N                                            | 2                                      | N                                   |
| IRF6         | 0.874107937                            | N                                            | 1                                      | N                                   |
| NEK8         | 0.874107937                            | N                                            | 0                                      | N                                   |
| PIGQ         | 0.874107937                            | N                                            | 0                                      | N                                   |
| SAMD9L       | 0.874107937                            | N                                            | 0                                      | N                                   |
| ARHGAP29     | 0.874143772                            | N                                            | 0                                      | N                                   |
| HNRNPLL      | 0.874476275                            | N                                            | 1                                      | N                                   |
| RBP1         | 0.874476275                            | N                                            | 4                                      | N                                   |
| RBMX2P3      | 0.87447898                             | N                                            | 0                                      | N                                   |
| AC009163.4   | 0.87450377                             | N                                            | 0                                      | N                                   |
| TAF9         | 0.87450377                             | N                                            | 0                                      | N                                   |
| MID1IP1      | 0.874556817                            | N                                            | 0                                      | N                                   |
| CAPG         | 0.874559896                            | N                                            | 1                                      | N                                   |
| PAQR8        | 0.874559896                            | N                                            | 0                                      | N                                   |
| SLC9A3R1     | 0.874559896                            | N                                            | 3                                      | N                                   |
| AC009053.2   | 0.874592772                            | N                                            | 0                                      | N                                   |
| AC093249.2   | 0.874592772                            | N                                            | 0                                      | N                                   |
| AC104237.3   | 0.874592772                            | N                                            | 0                                      | N                                   |
| AC105101.1   | 0.874592772                            | N                                            | 0                                      | N                                   |
| AMZ2P2       | 0.874592772                            | N                                            | 0                                      | N                                   |
| BX537318.1   | 0.874592772                            | N                                            | 0                                      | N                                   |
| CNOT8        | 0.874592772                            | N                                            | 2                                      | N                                   |
| DAGLB        | 0.874592772                            | N                                            | 1                                      | N                                   |
| DPYSL5       | 0.874592772                            | N                                            | 0                                      | N                                   |

| Gene symbols   | FDR (differential expression analysis) | Differentially expressed gene? Y, Yes; N, No | Number of insulin related publications | Insulin related gene? Y, Yes; N, No |
|----------------|----------------------------------------|----------------------------------------------|----------------------------------------|-------------------------------------|
| GNPAT          | 0.874592772                            | N                                            | 0                                      | N                                   |
| GNRH1          | 0.874592772                            | N                                            | 7                                      | N                                   |
| IQGAP2         | 0.874592772                            | N                                            | 2                                      | N                                   |
| LINC01270      | 0.874592772                            | N                                            | 0                                      | N                                   |
| PAK1           | 0.874592772                            | N                                            | 44                                     | N                                   |
| RHBDF1P1       | 0.874592772                            | N                                            | 0                                      | N                                   |
| RPL36A-HNRNPH2 | 0.874592772                            | N                                            | 0                                      | N                                   |
| RPS9           | 0.874592772                            | N                                            | 3                                      | N                                   |
| RSPH4A         | 0.874592772                            | N                                            | 0                                      | N                                   |
| SERINC2        | 0.874592772                            | N                                            | 0                                      | N                                   |
| SLC41A3        | 0.874592772                            | N                                            | 1                                      | N                                   |
| YES1           | 0.874592772                            | N                                            | 6                                      | N                                   |
| AC023509.3     | 0.874605135                            | N                                            | 0                                      | N                                   |
| ALG8           | 0.874605135                            | N                                            | 0                                      | N                                   |
| ANKRD26P4      | 0.874605135                            | N                                            | 0                                      | N                                   |
| GANAB          | 0.874605135                            | N                                            | 1                                      | N                                   |
| PROCR          | 0.874605135                            | N                                            | 8                                      | N                                   |
| SMC2-AS1       | 0.874605135                            | N                                            | 0                                      | N                                   |
| SMIM13         | 0.874605135                            | N                                            | 1                                      | N                                   |
| TBCAP3         | 0.874605135                            | N                                            | 0                                      | N                                   |
| ZNF716         | 0.874605135                            | N                                            | 0                                      | N                                   |
| KCTD14         | 0.874610873                            | N                                            | 0                                      | N                                   |
| PLIN5          | 0.874610873                            | N                                            | 26                                     | N                                   |
| PPP4C          | 0.874610873                            | N                                            | 0                                      | N                                   |
| SOD1P3         | 0.874610873                            | N                                            | 0                                      | N                                   |
| AC084082.1     | 0.874656182                            | N                                            | 0                                      | N                                   |
| AC105345.1     | 0.874734385                            | N                                            | 0                                      | N                                   |
| AC093849.1     | 0.874877525                            | N                                            | 0                                      | N                                   |
| AC107983.2     | 0.874877525                            | N                                            | 0                                      | N                                   |
| AC108866.1     | 0.874877525                            | N                                            | 0                                      | N                                   |
| ADGRF1         | 0.874877525                            | N                                            | 0                                      | N                                   |
| AJ011932.1     | 0.874877525                            | N                                            | 0                                      | N                                   |
| AL138759.1     | 0.874877525                            | N                                            | 0                                      | N                                   |
| AP005117.1     | 0.874877525                            | N                                            | 0                                      | N                                   |
| ASCL4          | 0.874877525                            | N                                            | 0                                      | N                                   |
| CDX1           | 0.874877525                            | N                                            | 3                                      | N                                   |
| FAM196A        | 0.874877525                            | N                                            | 0                                      | N                                   |
| FNDC4          | 0.874877525                            | N                                            | 1                                      | N                                   |
| RPL37          | 0.874877525                            | N                                            | 0                                      | N                                   |
| UCN2           | 0.874877525                            | N                                            | 9                                      | N                                   |
| ZNF618         | 0.874877525                            | N                                            | 0                                      | N                                   |
| CHMP2B         | 0.874933491                            | N                                            | 1                                      | N                                   |
| CU633906.2     | 0.874933491                            | N                                            | 0                                      | N                                   |
| RP11-521C22.3  | 0.874933491                            | N                                            | 0                                      | N                                   |
| STAC2          | 0.874933491                            | N                                            | 0                                      | N                                   |
| AC104986.2     | 0.87496962                             | N                                            | 0                                      | N                                   |
| AC108488.1     | 0.87496962                             | N                                            | 0                                      | N                                   |
| ANKS1B         | 0.87496962                             | N                                            | 0                                      | N                                   |
| CARMIL2        | 0.87496962                             | N                                            | 0                                      | N                                   |
| DPP3P2         | 0.87496962                             | N                                            | 0                                      | N                                   |
| RHPN1          | 0.87496962                             | N                                            | 1                                      | N                                   |
| AC005014.1     | 0.874982635                            | N                                            | 0                                      | N                                   |
| AC114495.2     | 0.874982635                            | N                                            | 0                                      | N                                   |
| AC244669.1     | 0.874982635                            | N                                            | 0                                      | N                                   |
| ANGPTL6        | 0.874982635                            | N                                            | 19                                     | N                                   |
| CADM2          | 0.874982635                            | N                                            | 3                                      | N                                   |
| CASK           | 0.874982635                            | N                                            | 8                                      | N                                   |
| COPS4          | 0.874982635                            | N                                            | 0                                      | N                                   |
| CPT2           | 0.874982635                            | N                                            | 27                                     | N                                   |
| CUTA           | 0.874982635                            | N                                            | 0                                      | N                                   |
| LDAH           | 0.874982635                            | N                                            | 1                                      | N                                   |
| NSD3           | 0.874982635                            | N                                            | 1                                      | N                                   |
| PEBP1P2        | 0.874982635                            | N                                            | 0                                      | N                                   |
| PLAGL1         | 0.874982635                            | N                                            | 35                                     | N                                   |
| PLAGL2         | 0.874982635                            | N                                            | 3                                      | N                                   |
| SLC2A3P4       | 0.874982635                            | N                                            | 0                                      | N                                   |

| Gene symbols | FDR (differential expression analysis) | Differentially expressed gene? Y, Yes; N, No | Number of insulin related publications | Insulin related gene? Y, Yes; N, No |
|--------------|----------------------------------------|----------------------------------------------|----------------------------------------|-------------------------------------|
| AC009362.1   | 0.875077353                            | N                                            | 0                                      | N                                   |
| AC063976.2   | 0.875077353                            | N                                            | 0                                      | N                                   |
| ACOT12       | 0.875077353                            | N                                            | 1                                      | N                                   |
| AL356056.2   | 0.875077353                            | N                                            | 0                                      | N                                   |
| AP4B1-AS1    | 0.875077353                            | N                                            | 0                                      | N                                   |
| LINC02073    | 0.875077353                            | N                                            | 0                                      | N                                   |
| PADI2        | 0.875077353                            | N                                            | 2                                      | N                                   |
| RAMP2        | 0.875077353                            | N                                            | 3                                      | N                                   |
| RPL29P11     | 0.875077353                            | N                                            | 0                                      | N                                   |
| RPS4XP16     | 0.875077353                            | N                                            | 0                                      | N                                   |
| SDHD         | 0.875077353                            | N                                            | 2                                      | N                                   |
| SP9          | 0.875077353                            | N                                            | 2                                      | N                                   |
| TMED10P2     | 0.875077353                            | N                                            | 0                                      | N                                   |
| AKT2         | 0.87514244                             | N                                            | 466                                    | Y                                   |
| ELF3         | 0.875241745                            | N                                            | 4                                      | N                                   |
| CD44         | 0.875277267                            | N                                            | 234                                    | Y                                   |
| GLULP6       | 0.875363096                            | N                                            | 0                                      | N                                   |
| AC098591.2   | 0.87537458                             | N                                            | 0                                      | N                                   |
| CSNK1D       | 0.87537458                             | N                                            | 1                                      | N                                   |
| LINC01182    | 0.87537458                             | N                                            | 0                                      | N                                   |
| PRPSAP1      | 0.87537458                             | N                                            | 1                                      | N                                   |
| SLX4IP       | 0.87537458                             | N                                            | 0                                      | N                                   |
| ZBTB7B       | 0.87537458                             | N                                            | 2                                      | N                                   |
| MYLK4        | 0.875405269                            | N                                            | 0                                      | N                                   |
| THUMPD3-AS1  | 0.875405269                            | N                                            | 0                                      | N                                   |
| SHROOM1      | 0.875445788                            | N                                            | 0                                      | N                                   |
| IKBKE        | 0.875466394                            | N                                            | 26                                     | N                                   |
| NECAP1       | 0.875466394                            | N                                            | 0                                      | N                                   |
| PGBD2        | 0.875466394                            | N                                            | 0                                      | N                                   |
| PHC2         | 0.875466394                            | N                                            | 0                                      | N                                   |
| XYLT2        | 0.875504707                            | N                                            | 1                                      | N                                   |
| ZNHIT3       | 0.875504707                            | N                                            | 0                                      | N                                   |
| PAX3         | 0.87561896                             | N                                            | 31                                     | N                                   |
| ZSCAN12      | 0.875643124                            | N                                            | 0                                      | N                                   |
| TEX21P       | 0.875647202                            | N                                            | 0                                      | N                                   |
| KCNAB1       | 0.875649241                            | N                                            | 1                                      | N                                   |
| PRH1         | 0.875649241                            | N                                            | 0                                      | N                                   |
| UBA52        | 0.875649241                            | N                                            | 0                                      | N                                   |
| C14orf132    | 0.875854336                            | N                                            | 0                                      | N                                   |
| NLRX1        | 0.875854336                            | N                                            | 2                                      | N                                   |
| SH3GLB2      | 0.875854336                            | N                                            | 0                                      | N                                   |
| AC009065.5   | 0.875955677                            | N                                            | 0                                      | N                                   |
| AC010735.2   | 0.875955677                            | N                                            | 0                                      | N                                   |
| AC012676.5   | 0.875955677                            | N                                            | 0                                      | N                                   |
| AC020917.4   | 0.875955677                            | N                                            | 0                                      | N                                   |
| AC020978.7   | 0.875955677                            | N                                            | 0                                      | N                                   |
| AC021006.3   | 0.875955677                            | N                                            | 0                                      | N                                   |
| AC026471.1   | 0.875955677                            | N                                            | 0                                      | N                                   |
| AC083843.3   | 0.875955677                            | N                                            | 0                                      | N                                   |
| AC090502.4   | 0.875955677                            | N                                            | 0                                      | N                                   |
| AC092546.1   | 0.875955677                            | N                                            | 0                                      | N                                   |
| AC093616.1   | 0.875955677                            | N                                            | 0                                      | N                                   |
| AC103591.3   | 0.875955677                            | N                                            | 0                                      | N                                   |
| AC109326.1   | 0.875955677                            | N                                            | 0                                      | N                                   |
| AL137792.1   | 0.875955677                            | N                                            | 0                                      | N                                   |
| AL353622.1   | 0.875955677                            | N                                            | 0                                      | N                                   |
| AL357568.1   | 0.875955677                            | N                                            | 0                                      | N                                   |
| ATF1         | 0.875955677                            | N                                            | 7                                      | N                                   |
| C2orf74      | 0.875955677                            | N                                            | 0                                      | N                                   |
| CASP3P1      | 0.875955677                            | N                                            | 0                                      | N                                   |
| CCNDBP1      | 0.875955677                            | N                                            | 0                                      | N                                   |
| CRB1         | 0.875955677                            | N                                            | 1                                      | N                                   |
| DHX57        | 0.875955677                            | N                                            | 0                                      | N                                   |
| DUSP7        | 0.875955677                            | N                                            | 0                                      | N                                   |
| HNRNPA3P6    | 0.875955677                            | N                                            | 0                                      | N                                   |
| LINC01978    | 0.875955677                            | N                                            | 0                                      | N                                   |

| Gene symbols | FDR (differential expression analysis) | Differentially expressed gene? Y, Yes; N, No | Number of insulin related publications | Insulin related gene? Y, Yes; N, No |
|--------------|----------------------------------------|----------------------------------------------|----------------------------------------|-------------------------------------|
| N4BP2        | 0.875955677                            | N                                            | 0                                      | N                                   |
| PDP1         | 0.875955677                            | N                                            | 11                                     | N                                   |
| PPP1R2P3     | 0.875955677                            | N                                            | 0                                      | N                                   |
| PTPRQ        | 0.875955677                            | N                                            | 0                                      | N                                   |
| RHBDF2       | 0.875955677                            | N                                            | 0                                      | N                                   |
| RP11-517A5.4 | 0.875955677                            | N                                            | 0                                      | N                                   |
| SEC61B       | 0.875955677                            | N                                            | 0                                      | N                                   |
| SERF1A       | 0.875955677                            | N                                            | 0                                      | N                                   |
| SLC1A4       | 0.875955677                            | N                                            | 0                                      | N                                   |
| SLC30A9      | 0.875955677                            | N                                            | 0                                      | N                                   |
| SMG1P3       | 0.875955677                            | N                                            | 0                                      | N                                   |
| SOCS5P4      | 0.875955677                            | N                                            | 0                                      | N                                   |
| STAG3L4      | 0.875955677                            | N                                            | 0                                      | N                                   |
| SYT8         | 0.875955677                            | N                                            | 2                                      | N                                   |
| TADA1        | 0.875955677                            | N                                            | 0                                      | N                                   |
| TMEM100      | 0.875955677                            | N                                            | 0                                      | N                                   |
| TMEM120B     | 0.875955677                            | N                                            | 0                                      | N                                   |
| TTC12        | 0.875955677                            | N                                            | 0                                      | N                                   |
| UBE2V2P3     | 0.875955677                            | N                                            | 0                                      | N                                   |
| VIRMA        | 0.875955677                            | N                                            | 0                                      | N                                   |
| ZFP1         | 0.875955677                            | N                                            | 0                                      | N                                   |
| AC080014.1   | 0.875989789                            | N                                            | 0                                      | N                                   |
| CNNM2        | 0.875989789                            | N                                            | 4                                      | N                                   |
| INO80B-WBP1  | 0.875989789                            | N                                            | 0                                      | N                                   |
| POU2F1       | 0.875989789                            | N                                            | 15                                     | N                                   |
| PRR34        | 0.875989789                            | N                                            | 0                                      | N                                   |
| BEX1         | 0.876290748                            | N                                            | 1                                      | N                                   |
| RARG         | 0.876290748                            | N                                            | 2                                      | N                                   |
| AC108463.1   | 0.87638049                             | N                                            | 0                                      | N                                   |
| BEX3         | 0.87638049                             | N                                            | 0                                      | N                                   |
| CCDC75P1     | 0.87638049                             | N                                            | 0                                      | N                                   |
| PHKA1        | 0.87638049                             | N                                            | 2                                      | N                                   |
| TLL7         | 0.87638049                             | N                                            | 0                                      | N                                   |
| UQCRBP1      | 0.876486652                            | N                                            | 0                                      | N                                   |
| GPR20        | 0.876500456                            | N                                            | 1                                      | N                                   |
| NUFIP1       | 0.876500456                            | N                                            | 0                                      | N                                   |
| ZNF175       | 0.87653448                             | N                                            | 0                                      | N                                   |
| CRACR2B      | 0.876662273                            | N                                            | 1                                      | N                                   |
| EXOC3L2      | 0.876673691                            | N                                            | 1                                      | N                                   |
| HAS3         | 0.876673691                            | N                                            | 7                                      | N                                   |
| PCGF5        | 0.876673691                            | N                                            | 0                                      | N                                   |
| SIRT5        | 0.876673691                            | N                                            | 11                                     | N                                   |
| AC007326.2   | 0.876697435                            | N                                            | 0                                      | N                                   |
| AC096919.1   | 0.876713098                            | N                                            | 0                                      | N                                   |
| AC104794.2   | 0.876713098                            | N                                            | 0                                      | N                                   |
| AC147067.1   | 0.876713098                            | N                                            | 0                                      | N                                   |
| ACOT8        | 0.876713098                            | N                                            | 1                                      | N                                   |
| AL353625.1   | 0.876713098                            | N                                            | 0                                      | N                                   |
| AL354861.1   | 0.876713098                            | N                                            | 0                                      | N                                   |
| C4orf32      | 0.876713098                            | N                                            | 1                                      | N                                   |
| LINC01247    | 0.876934547                            | N                                            | 0                                      | N                                   |
| IP6K1        | 0.877080767                            | N                                            | 19                                     | N                                   |
| TMEM14B      | 0.877080767                            | N                                            | 0                                      | N                                   |
| AC093495.1   | 0.87721773                             | N                                            | 0                                      | N                                   |
| VPS35        | 0.87721773                             | N                                            | 5                                      | N                                   |
| TBC1D5       | 0.877263871                            | N                                            | 0                                      | N                                   |
| AC105219.1   | 0.877276058                            | N                                            | 0                                      | N                                   |
| SRPRB        | 0.877276058                            | N                                            | 0                                      | N                                   |
| TOLLIP-AS1   | 0.877276058                            | N                                            | 0                                      | N                                   |
| UBXN1        | 0.877276058                            | N                                            | 0                                      | N                                   |
| EFHD1        | 0.877282138                            | N                                            | 1                                      | N                                   |
| AP000708.1   | 0.877316671                            | N                                            | 0                                      | N                                   |
| ATG10        | 0.877361699                            | N                                            | 1                                      | N                                   |
| SCRN2        | 0.877361699                            | N                                            | 0                                      | N                                   |
| RPL30        | 0.877492194                            | N                                            | 0                                      | N                                   |
| DHX37        | 0.877499703                            | N                                            | 0                                      | N                                   |

| Gene symbols | FDR (differential expression analysis) | Differentially expressed gene? Y, Yes; N, No | Number of insulin related publications | Insulin related gene? Y, Yes; N, No |
|--------------|----------------------------------------|----------------------------------------------|----------------------------------------|-------------------------------------|
| AC006064.4   | 0.877521105                            | N                                            | 0                                      | N                                   |
| AC092653.2   | 0.877521105                            | N                                            | 0                                      | N                                   |
| AC007318.1   | 0.87754988                             | N                                            | 0                                      | N                                   |
| JPX          | 0.87755644                             | N                                            | 3                                      | N                                   |
| AC093890.1   | 0.877569638                            | N                                            | 0                                      | N                                   |
| PLXNB2       | 0.877569638                            | N                                            | 0                                      | N                                   |
| ZNF385D      | 0.877662198                            | N                                            | 0                                      | N                                   |
| AC023813.2   | 0.87776635                             | N                                            | 0                                      | N                                   |
| CBY1         | 0.87776635                             | N                                            | 0                                      | N                                   |
| KIAA1614     | 0.87776635                             | N                                            | 0                                      | N                                   |
| SNUPN        | 0.877800161                            | N                                            | 0                                      | N                                   |
| FNDC11       | 0.877877987                            | N                                            | 0                                      | N                                   |
| AC004000.1   | 0.877903565                            | N                                            | 0                                      | N                                   |
| AC010326.2   | 0.877903565                            | N                                            | 0                                      | N                                   |
| AC074183.2   | 0.877903565                            | N                                            | 0                                      | N                                   |
| AC090643.1   | 0.877903565                            | N                                            | 0                                      | N                                   |
| AL160153.1   | 0.877903565                            | N                                            | 0                                      | N                                   |
| CAPZA2       | 0.877903565                            | N                                            | 0                                      | N                                   |
| FABP7P1      | 0.877903565                            | N                                            | 0                                      | N                                   |
| FRS3         | 0.877903565                            | N                                            | 2                                      | N                                   |
| PLEK2        | 0.877903565                            | N                                            | 1                                      | N                                   |
| RPL18P10     | 0.877903565                            | N                                            | 0                                      | N                                   |
| RWDD3        | 0.877903565                            | N                                            | 0                                      | N                                   |
| EPN2         | 0.878071133                            | N                                            | 0                                      | N                                   |
| MBD2         | 0.878071133                            | N                                            | 7                                      | N                                   |
| ZNF180       | 0.878071133                            | N                                            | 0                                      | N                                   |
| ZBTB46       | 0.878154434                            | N                                            | 0                                      | N                                   |
| ABCA4        | 0.878157444                            | N                                            | 4                                      | N                                   |
| AC002486.2   | 0.878157444                            | N                                            | 0                                      | N                                   |
| AC092614.1   | 0.878157444                            | N                                            | 0                                      | N                                   |
| AC106047.1   | 0.878157444                            | N                                            | 0                                      | N                                   |
| AC108120.1   | 0.878157444                            | N                                            | 0                                      | N                                   |
| AL353726.1   | 0.878157444                            | N                                            | 0                                      | N                                   |
| CECR7        | 0.878157444                            | N                                            | 0                                      | N                                   |
| CNBD2        | 0.878157444                            | N                                            | 0                                      | N                                   |
| DCP2         | 0.878157444                            | N                                            | 2                                      | N                                   |
| DDX6P1       | 0.878157444                            | N                                            | 0                                      | N                                   |
| FAF2P1       | 0.878157444                            | N                                            | 0                                      | N                                   |
| GNRHR2       | 0.878157444                            | N                                            | 2                                      | N                                   |
| KIRREL1-IT1  | 0.878157444                            | N                                            | 0                                      | N                                   |
| MAATS1       | 0.878157444                            | N                                            | 0                                      | N                                   |
| MOSPD2       | 0.878157444                            | N                                            | 0                                      | N                                   |
| NUTF2P4      | 0.878157444                            | N                                            | 0                                      | N                                   |
| PPIAP22      | 0.878157444                            | N                                            | 0                                      | N                                   |
| THAP8        | 0.878157444                            | N                                            | 0                                      | N                                   |
| VMP1         | 0.878157444                            | N                                            | 1                                      | N                                   |
| ZNF747       | 0.878157444                            | N                                            | 0                                      | N                                   |
| AL356234.1   | 0.878226906                            | N                                            | 0                                      | N                                   |
| AC099548.2   | 0.878312117                            | N                                            | 0                                      | N                                   |
| ADIPOR2      | 0.878312117                            | N                                            | 344                                    | Y                                   |
| EREG         | 0.878312117                            | N                                            | 14                                     | N                                   |
| LAPTM5       | 0.878312117                            | N                                            | 0                                      | N                                   |
| YWHAEP5      | 0.878312117                            | N                                            | 0                                      | N                                   |
| ZNF543       | 0.878312117                            | N                                            | 0                                      | N                                   |
| TRIM6-TRIM34 | 0.878474307                            | N                                            | 0                                      | N                                   |
| RPL23AP37    | 0.878545495                            | N                                            | 0                                      | N                                   |
| DPYD-IT1     | 0.878561353                            | N                                            | 0                                      | N                                   |
| ATOX1        | 0.878786028                            | N                                            | 1                                      | N                                   |
| AP3D1        | 0.878849243                            | N                                            | 1                                      | N                                   |
| ABCA12       | 0.878865398                            | N                                            | 1                                      | N                                   |
| AC009690.1   | 0.878865398                            | N                                            | 0                                      | N                                   |
| AC011492.1   | 0.878865398                            | N                                            | 0                                      | N                                   |
| AC016747.4   | 0.878865398                            | N                                            | 0                                      | N                                   |
| AC022483.1   | 0.878865398                            | N                                            | 0                                      | N                                   |
| AC027373.1   | 0.878865398                            | N                                            | 0                                      | N                                   |
| AKIRIN1P2    | 0.878865398                            | N                                            | 0                                      | N                                   |

| Gene symbols | FDR (differential expression analysis) | Differentially expressed gene? Y, Yes; N, No | Number of insulin related publications | Insulin related gene? Y, Yes; N, No |
|--------------|----------------------------------------|----------------------------------------------|----------------------------------------|-------------------------------------|
| AL024498.1   | 0.878865398                            | N                                            | 0                                      | N                                   |
| AL354696.1   | 0.878865398                            | N                                            | 0                                      | N                                   |
| AL513548.1   | 0.878865398                            | N                                            | 0                                      | N                                   |
| AL583722.1   | 0.878865398                            | N                                            | 0                                      | N                                   |
| ASB3         | 0.878865398                            | N                                            | 0                                      | N                                   |
| BBIP1        | 0.878865398                            | N                                            | 0                                      | N                                   |
| C1GALT1P2    | 0.878865398                            | N                                            | 0                                      | N                                   |
| CAMK1G       | 0.878865398                            | N                                            | 0                                      | N                                   |
| CRYZP2       | 0.878865398                            | N                                            | 0                                      | N                                   |
| DNAJC19P5    | 0.878865398                            | N                                            | 0                                      | N                                   |
| ECM1         | 0.878865398                            | N                                            | 9                                      | N                                   |
| FAM200B      | 0.878865398                            | N                                            | 0                                      | N                                   |
| FLJ40194     | 0.878865398                            | N                                            | 0                                      | N                                   |
| LINC01144    | 0.878865398                            | N                                            | 0                                      | N                                   |
| MAPK4        | 0.878865398                            | N                                            | 2                                      | N                                   |
| MAU2         | 0.878865398                            | N                                            | 0                                      | N                                   |
| SEH1L        | 0.878865398                            | N                                            | 0                                      | N                                   |
| SNORA71B     | 0.878865398                            | N                                            | 0                                      | N                                   |
| TLK2         | 0.878865398                            | N                                            | 0                                      | N                                   |
| TMEM18       | 0.878865398                            | N                                            | 9                                      | N                                   |
| U73166.1     | 0.878865398                            | N                                            | 0                                      | N                                   |
| AC015813.2   | 0.878924404                            | N                                            | 0                                      | N                                   |
| AC097488.1   | 0.878924404                            | N                                            | 0                                      | N                                   |
| AC104806.2   | 0.878924404                            | N                                            | 0                                      | N                                   |
| C12orf66     | 0.878924404                            | N                                            | 0                                      | N                                   |
| SPON2        | 0.878924404                            | N                                            | 1                                      | N                                   |
| CCDC87       | 0.87894374                             | N                                            | 0                                      | N                                   |
| CHKB         | 0.87894374                             | N                                            | 1                                      | N                                   |
| IMPG1        | 0.87894374                             | N                                            | 0                                      | N                                   |
| LINC00652    | 0.87894374                             | N                                            | 0                                      | N                                   |
| LINC00700    | 0.87894374                             | N                                            | 0                                      | N                                   |
| AC022730.4   | 0.878959088                            | N                                            | 0                                      | N                                   |
| LINC02338    | 0.878959088                            | N                                            | 0                                      | N                                   |
| PRKD2        | 0.879020445                            | N                                            | 1                                      | N                                   |
| AL133243.2   | 0.879123476                            | N                                            | 0                                      | N                                   |
| PIK3R5       | 0.879123476                            | N                                            | 2                                      | N                                   |
| SPRYD3       | 0.879123476                            | N                                            | 0                                      | N                                   |
| AL079342.2   | 0.879134834                            | N                                            | 0                                      | N                                   |
| CFH          | 0.879134834                            | N                                            | 10                                     | N                                   |
| SLC16A6      | 0.879134834                            | N                                            | 0                                      | N                                   |
| PABPC4L      | 0.879227897                            | N                                            | 0                                      | N                                   |
| AC027271.1   | 0.8792474                              | N                                            | 0                                      | N                                   |
| AC080013.3   | 0.8792474                              | N                                            | 0                                      | N                                   |
| AC092295.2   | 0.8792474                              | N                                            | 0                                      | N                                   |
| AL391095.1   | 0.8792474                              | N                                            | 0                                      | N                                   |
| AP002833.1   | 0.8792474                              | N                                            | 0                                      | N                                   |
| APOBEC3D     | 0.8792474                              | N                                            | 0                                      | N                                   |
| BRAP         | 0.8792474                              | N                                            | 5                                      | N                                   |
| EPGN         | 0.8792474                              | N                                            | 0                                      | N                                   |
| FAM66B       | 0.8792474                              | N                                            | 0                                      | N                                   |
| KPNA2P2      | 0.8792474                              | N                                            | 0                                      | N                                   |
| MLXIPL       | 0.8792474                              | N                                            | 120                                    | Y                                   |
| WDR25        | 0.8792474                              | N                                            | 0                                      | N                                   |
| Y_RNA        | 0.8792474                              | N                                            | 2                                      | N                                   |
| AC092747.4   | 0.879270574                            | N                                            | 0                                      | N                                   |
| CTA-292E10.9 | 0.879270574                            | N                                            | 0                                      | N                                   |
| HS3ST3B1     | 0.879270574                            | N                                            | 0                                      | N                                   |
| RRNAD1       | 0.879270574                            | N                                            | 0                                      | N                                   |
| ZNF556       | 0.879270574                            | N                                            | 0                                      | N                                   |
| ABCB10       | 0.879359523                            | N                                            | 0                                      | N                                   |
| FAM98B       | 0.879359523                            | N                                            | 0                                      | N                                   |
| FZD4         | 0.879359523                            | N                                            | 8                                      | N                                   |
| PKIB         | 0.879359523                            | N                                            | 2                                      | N                                   |
| RIOK3P1      | 0.879359523                            | N                                            | 0                                      | N                                   |
| SYTL1        | 0.879359523                            | N                                            | 1                                      | N                                   |
| NFIA         | 0.879409825                            | N                                            | 7                                      | N                                   |

| Gene symbols   | FDR (differential expression analysis) | Differentially expressed gene? Y, Yes; N, No | Number of insulin related publications | Insulin related gene? Y, Yes; N, No |
|----------------|----------------------------------------|----------------------------------------------|----------------------------------------|-------------------------------------|
| OLA1P2         | 0.879409825                            | N                                            | 0                                      | N                                   |
| ZNF304         | 0.879409825                            | N                                            | 0                                      | N                                   |
| RASGRF1        | 0.879450767                            | N                                            | 27                                     | N                                   |
| MYOZ2          | 0.87948803                             | N                                            | 2                                      | N                                   |
| AC016542.1     | 0.879510743                            | N                                            | 0                                      | N                                   |
| C11orf71       | 0.879510743                            | N                                            | 0                                      | N                                   |
| RPS12P16       | 0.879510743                            | N                                            | 0                                      | N                                   |
| WIPF3          | 0.879510743                            | N                                            | 0                                      | N                                   |
| DIS3L          | 0.879590191                            | N                                            | 0                                      | N                                   |
| ACOT11         | 0.879642555                            | N                                            | 1                                      | N                                   |
| AMD1P3         | 0.879642555                            | N                                            | 0                                      | N                                   |
| TRMT2A         | 0.879642555                            | N                                            | 0                                      | N                                   |
| HNF1A-AS1      | 0.879656607                            | N                                            | 0                                      | N                                   |
| S100A16        | 0.879656607                            | N                                            | 2                                      | N                                   |
| AC007787.2     | 0.87971452                             | N                                            | 0                                      | N                                   |
| URAHF          | 0.87971452                             | N                                            | 2                                      | N                                   |
| CICP27         | 0.879719931                            | N                                            | 0                                      | N                                   |
| HIGD1A         | 0.879719931                            | N                                            | 1                                      | N                                   |
| LMO7-AS1       | 0.879719931                            | N                                            | 0                                      | N                                   |
| VPS25P1        | 0.879719931                            | N                                            | 0                                      | N                                   |
| AMZ2P1         | 0.879818699                            | N                                            | 0                                      | N                                   |
| AC022080.2     | 0.879823335                            | N                                            | 0                                      | N                                   |
| TAGLN          | 0.879823335                            | N                                            | 11                                     | N                                   |
| CTD-2277K2.1   | 0.879824722                            | N                                            | 0                                      | N                                   |
| GALNT4         | 0.879883077                            | N                                            | 0                                      | N                                   |
| AC074367.1     | 0.88009001                             | N                                            | 0                                      | N                                   |
| GPR83          | 0.880154202                            | N                                            | 2                                      | N                                   |
| NAMPTP1        | 0.880154202                            | N                                            | 0                                      | N                                   |
| HNRNPUL1       | 0.880171233                            | N                                            | 0                                      | N                                   |
| MAPKAPK3       | 0.880171233                            | N                                            | 1                                      | N                                   |
| AK3P2          | 0.880313162                            | N                                            | 0                                      | N                                   |
| EID2           | 0.880313162                            | N                                            | 0                                      | N                                   |
| AL671710.1     | 0.880353677                            | N                                            | 0                                      | N                                   |
| CDIP1          | 0.880353677                            | N                                            | 0                                      | N                                   |
| RAD1P1         | 0.880353677                            | N                                            | 0                                      | N                                   |
| VAR5           | 0.880353677                            | N                                            | 2                                      | N                                   |
| ARMCX5-GPRASP2 | 0.88044359                             | N                                            | 0                                      | N                                   |
| FBXO38         | 0.880445811                            | N                                            | 0                                      | N                                   |
| ZNF28          | 0.880445811                            | N                                            | 0                                      | N                                   |
| IGSF8          | 0.880589922                            | N                                            | 0                                      | N                                   |
| KIAA1644       | 0.880589922                            | N                                            | 0                                      | N                                   |
| AC012676.4     | 0.880623494                            | N                                            | 0                                      | N                                   |
| AP5S1          | 0.880623494                            | N                                            | 0                                      | N                                   |
| APOBEC3G       | 0.880623494                            | N                                            | 1                                      | N                                   |
| BARX1          | 0.880623494                            | N                                            | 2                                      | N                                   |
| BCL2L1         | 0.880623494                            | N                                            | 167                                    | Y                                   |
| FAM196B        | 0.880623494                            | N                                            | 0                                      | N                                   |
| GANC           | 0.880623494                            | N                                            | 1                                      | N                                   |
| MAFG-AS1       | 0.880623494                            | N                                            | 0                                      | N                                   |
| MLC1           | 0.880623494                            | N                                            | 2                                      | N                                   |
| PAOX           | 0.880623494                            | N                                            | 1                                      | N                                   |
| SMAGP          | 0.880623494                            | N                                            | 1                                      | N                                   |
| TMEM97P2       | 0.880623494                            | N                                            | 0                                      | N                                   |
| AC060766.1     | 0.880626724                            | N                                            | 0                                      | N                                   |
| AL157702.2     | 0.880647189                            | N                                            | 0                                      | N                                   |
| EPHA1-AS1      | 0.880647189                            | N                                            | 0                                      | N                                   |
| GKAP1          | 0.880647189                            | N                                            | 1                                      | N                                   |
| AC020656.2     | 0.880806209                            | N                                            | 0                                      | N                                   |
| TXNP1          | 0.880822923                            | N                                            | 0                                      | N                                   |
| AC006273.1     | 0.880826688                            | N                                            | 0                                      | N                                   |
| RRAS           | 0.880899044                            | N                                            | 7                                      | N                                   |
| AC010878.1     | 0.88089934                             | N                                            | 0                                      | N                                   |
| AC131649.2     | 0.88089934                             | N                                            | 0                                      | N                                   |
| AP001889.1     | 0.88089934                             | N                                            | 0                                      | N                                   |
| COX7A2         | 0.88089934                             | N                                            | 2                                      | N                                   |
| FARSA          | 0.88089934                             | N                                            | 0                                      | N                                   |

| Gene symbols  | FDR (differential expression analysis) | Differentially expressed gene? Y, Yes; N, No | Number of insulin related publications | Insulin related gene? Y, Yes; N, No |
|---------------|----------------------------------------|----------------------------------------------|----------------------------------------|-------------------------------------|
| HRH3          | 0.88089934                             | N                                            | 0                                      | N                                   |
| SCAMP4        | 0.880929669                            | N                                            | 0                                      | N                                   |
| USP24         | 0.880929669                            | N                                            | 0                                      | N                                   |
| AC055811.2    | 0.880981573                            | N                                            | 0                                      | N                                   |
| ALOXE3        | 0.880981573                            | N                                            | 1                                      | N                                   |
| SSR1          | 0.880981573                            | N                                            | 2                                      | N                                   |
| TMEM147       | 0.880994713                            | N                                            | 0                                      | N                                   |
| AC002310.1    | 0.88102485                             | N                                            | 0                                      | N                                   |
| AC006486.1    | 0.88102485                             | N                                            | 0                                      | N                                   |
| AC021483.2    | 0.88102485                             | N                                            | 0                                      | N                                   |
| AC023043.4    | 0.88102485                             | N                                            | 0                                      | N                                   |
| MAGEA10       | 0.88102485                             | N                                            | 0                                      | N                                   |
| PLRG1         | 0.88102485                             | N                                            | 0                                      | N                                   |
| SNX16         | 0.88102485                             | N                                            | 1                                      | N                                   |
| SPTB          | 0.88102485                             | N                                            | 5                                      | N                                   |
| NUDCD3        | 0.881041529                            | N                                            | 0                                      | N                                   |
| SPAG7         | 0.881044109                            | N                                            | 0                                      | N                                   |
| LINC00926     | 0.881216359                            | N                                            | 0                                      | N                                   |
| NUP210L       | 0.881216359                            | N                                            | 0                                      | N                                   |
| ARAP3         | 0.881276557                            | N                                            | 1                                      | N                                   |
| CDKN1C        | 0.881276557                            | N                                            | 104                                    | Y                                   |
| DPYS          | 0.881276557                            | N                                            | 0                                      | N                                   |
| FAM87A        | 0.881276557                            | N                                            | 0                                      | N                                   |
| LINC00595     | 0.881276557                            | N                                            | 0                                      | N                                   |
| LINC01579     | 0.881276557                            | N                                            | 0                                      | N                                   |
| OSGEP         | 0.881276557                            | N                                            | 0                                      | N                                   |
| RPTOR         | 0.881276557                            | N                                            | 70                                     | N                                   |
| SPIN2B        | 0.881276557                            | N                                            | 1                                      | N                                   |
| TUBA4A        | 0.881276557                            | N                                            | 0                                      | N                                   |
| AOX3P         | 0.881444077                            | N                                            | 1                                      | N                                   |
| GRPEL2P2      | 0.881444077                            | N                                            | 0                                      | N                                   |
| NT5C3AP1      | 0.881444077                            | N                                            | 0                                      | N                                   |
| AC087203.3    | 0.881444085                            | N                                            | 0                                      | N                                   |
| AC108010.1    | 0.88148477                             | N                                            | 0                                      | N                                   |
| AL596325.1    | 0.88148477                             | N                                            | 0                                      | N                                   |
| RAPGEF5       | 0.88148477                             | N                                            | 0                                      | N                                   |
| SUPT20H       | 0.88148477                             | N                                            | 0                                      | N                                   |
| AK3P5         | 0.881489718                            | N                                            | 0                                      | N                                   |
| IFFO2         | 0.881568114                            | N                                            | 0                                      | N                                   |
| RIOK2         | 0.881568114                            | N                                            | 0                                      | N                                   |
| AC104117.2    | 0.881770042                            | N                                            | 0                                      | N                                   |
| AL160286.1    | 0.881770042                            | N                                            | 0                                      | N                                   |
| GNA13         | 0.881770042                            | N                                            | 2                                      | N                                   |
| HEIH          | 0.881770042                            | N                                            | 1                                      | N                                   |
| KIAA0087      | 0.881770042                            | N                                            | 0                                      | N                                   |
| RHOT1         | 0.881770042                            | N                                            | 0                                      | N                                   |
| RP11-112N13.1 | 0.881770042                            | N                                            | 0                                      | N                                   |
| RP11-22P4.1   | 0.881770042                            | N                                            | 0                                      | N                                   |
| RPL5P12       | 0.881770042                            | N                                            | 0                                      | N                                   |
| SERPIN1       | 0.881770042                            | N                                            | 0                                      | N                                   |
| WNK2          | 0.881770042                            | N                                            | 0                                      | N                                   |
| AC090922.1    | 0.881837294                            | N                                            | 0                                      | N                                   |
| AL359845.1    | 0.882097554                            | N                                            | 0                                      | N                                   |
| C2orf50       | 0.882097554                            | N                                            | 0                                      | N                                   |
| DLD           | 0.882097554                            | N                                            | 13                                     | N                                   |
| KLF10         | 0.882097554                            | N                                            | 5                                      | N                                   |
| LRRFIP2       | 0.882097554                            | N                                            | 0                                      | N                                   |
| SMC5-AS1      | 0.882097554                            | N                                            | 0                                      | N                                   |
| TMED1         | 0.882097554                            | N                                            | 0                                      | N                                   |
| LINC00525     | 0.882102842                            | N                                            | 0                                      | N                                   |
| SMAD3         | 0.882106672                            | N                                            | 151                                    | Y                                   |
| ANKRD18DP     | 0.882126118                            | N                                            | 0                                      | N                                   |
| COL13A1       | 0.882126118                            | N                                            | 1                                      | N                                   |
| PTGR2         | 0.882126118                            | N                                            | 1                                      | N                                   |
| ZNF622        | 0.882245026                            | N                                            | 0                                      | N                                   |
| AL035563.1    | 0.88237283                             | N                                            | 0                                      | N                                   |



| Gene symbols | FDR (differential expression analysis) | Differentially expressed gene? Y, Yes; N, No | Number of insulin related publications | Insulin related gene? Y, Yes; N, No |
|--------------|----------------------------------------|----------------------------------------------|----------------------------------------|-------------------------------------|
| COQ10B       | 0.88237283                             | N                                            | 0                                      | N                                   |
| LTN1         | 0.882461755                            | N                                            | 0                                      | N                                   |
| AC005840.3   | 0.882711464                            | N                                            | 0                                      | N                                   |
| SLC27A1      | 0.882711464                            | N                                            | 51                                     | N                                   |
| THSD1        | 0.882711464                            | N                                            | 0                                      | N                                   |
| RPS6KB1      | 0.882856152                            | N                                            | 17                                     | N                                   |
| ATG9B        | 0.88290392                             | N                                            | 0                                      | N                                   |
| PHLDB1       | 0.88296565                             | N                                            | 1                                      | N                                   |
| PKD1P6       | 0.883118482                            | N                                            | 0                                      | N                                   |
| SLC25A17     | 0.883402691                            | N                                            | 0                                      | N                                   |
| TIE1         | 0.883402691                            | N                                            | 5                                      | N                                   |
| AC002985.1   | 0.883419895                            | N                                            | 0                                      | N                                   |
| AC092123.1   | 0.883419895                            | N                                            | 0                                      | N                                   |
| IFT140       | 0.883419895                            | N                                            | 1                                      | N                                   |
| JMJD4        | 0.883419895                            | N                                            | 0                                      | N                                   |
| AC018638.7   | 0.883678285                            | N                                            | 0                                      | N                                   |
| APBB1        | 0.883678285                            | N                                            | 4                                      | N                                   |
| LARP4B       | 0.883678285                            | N                                            | 0                                      | N                                   |
| PRR3         | 0.883678285                            | N                                            | 0                                      | N                                   |
| TLR3         | 0.883678285                            | N                                            | 44                                     | N                                   |
| AL138847.2   | 0.883685872                            | N                                            | 0                                      | N                                   |
| AC013472.1   | 0.883893937                            | N                                            | 0                                      | N                                   |
| BEAN1        | 0.883893937                            | N                                            | 0                                      | N                                   |
| CHMP4B       | 0.883893937                            | N                                            | 0                                      | N                                   |
| AC100814.1   | 0.884108169                            | N                                            | 0                                      | N                                   |
| AC109439.1   | 0.884108169                            | N                                            | 0                                      | N                                   |
| ADCK2        | 0.884108169                            | N                                            | 0                                      | N                                   |
| AL731566.1   | 0.884108169                            | N                                            | 0                                      | N                                   |
| DZANK1       | 0.884108169                            | N                                            | 0                                      | N                                   |
| INPP1        | 0.884108169                            | N                                            | 0                                      | N                                   |
| IRAK3        | 0.884108169                            | N                                            | 3                                      | N                                   |
| TRHDE        | 0.884108169                            | N                                            | 1                                      | N                                   |
| AC004803.1   | 0.884191021                            | N                                            | 0                                      | N                                   |
| AC010323.1   | 0.884191021                            | N                                            | 0                                      | N                                   |
| AC090568.2   | 0.884191021                            | N                                            | 0                                      | N                                   |
| HMGN4        | 0.884191021                            | N                                            | 0                                      | N                                   |
| TYW5         | 0.884228763                            | N                                            | 0                                      | N                                   |
| HSD17B11     | 0.884249793                            | N                                            | 1                                      | N                                   |
| MYO1G        | 0.884249793                            | N                                            | 0                                      | N                                   |
| PEL12        | 0.884249793                            | N                                            | 0                                      | N                                   |
| TMEM14DP     | 0.884249793                            | N                                            | 0                                      | N                                   |
| AC078883.1   | 0.884287213                            | N                                            | 0                                      | N                                   |
| C9orf16      | 0.884287213                            | N                                            | 0                                      | N                                   |
| ME3          | 0.884287213                            | N                                            | 7                                      | N                                   |
| MROH1        | 0.884287213                            | N                                            | 0                                      | N                                   |
| TDRD3        | 0.884287213                            | N                                            | 0                                      | N                                   |
| AC051619.5   | 0.884362507                            | N                                            | 0                                      | N                                   |
| TRIP10       | 0.884537115                            | N                                            | 6                                      | N                                   |
| AC098859.1   | 0.884583459                            | N                                            | 0                                      | N                                   |
| AP000577.1   | 0.884707331                            | N                                            | 0                                      | N                                   |
| SPR          | 0.884710724                            | N                                            | 84                                     | N                                   |
| AL022100.1   | 0.884745278                            | N                                            | 0                                      | N                                   |
| CD7          | 0.884745278                            | N                                            | 4                                      | N                                   |
| IL12RB1      | 0.884745278                            | N                                            | 1                                      | N                                   |
| MUC12        | 0.884745278                            | N                                            | 1                                      | N                                   |
| ZMIZ2        | 0.884745278                            | N                                            | 1                                      | N                                   |
| PTGES2       | 0.885029258                            | N                                            | 2                                      | N                                   |
| MYL12BP1     | 0.885072663                            | N                                            | 0                                      | N                                   |
| AC015818.9   | 0.885170944                            | N                                            | 0                                      | N                                   |
| AC090774.3   | 0.885202581                            | N                                            | 0                                      | N                                   |
| AC068134.3   | 0.885412823                            | N                                            | 0                                      | N                                   |
| C7orf25      | 0.885412823                            | N                                            | 0                                      | N                                   |
| AL139156.1   | 0.885417314                            | N                                            | 0                                      | N                                   |
| GRIPAP1      | 0.885417314                            | N                                            | 0                                      | N                                   |
| MIER1        | 0.885417314                            | N                                            | 1                                      | N                                   |
| ZNF707       | 0.885493035                            | N                                            | 0                                      | N                                   |

| Gene symbols | FDR (differential expression analysis) | Differentially expressed gene? Y, Yes; N, No | Number of insulin related publications | Insulin related gene? Y, Yes; N, No |
|--------------|----------------------------------------|----------------------------------------------|----------------------------------------|-------------------------------------|
| AC093227.1   | 0.885504638                            | N                                            | 0                                      | N                                   |
| AC079140.3   | 0.885623934                            | N                                            | 0                                      | N                                   |
| ADAM10       | 0.885623934                            | N                                            | 35                                     | N                                   |
| AL157770.1   | 0.885623934                            | N                                            | 0                                      | N                                   |
| EPPIN        | 0.885623934                            | N                                            | 0                                      | N                                   |
| PTGR1        | 0.885630868                            | N                                            | 1                                      | N                                   |
| AC079466.1   | 0.885646964                            | N                                            | 0                                      | N                                   |
| AC245595.1   | 0.885646964                            | N                                            | 0                                      | N                                   |
| ACBD6        | 0.885646964                            | N                                            | 0                                      | N                                   |
| LINC01873    | 0.885646964                            | N                                            | 0                                      | N                                   |
| PSMC6        | 0.885646964                            | N                                            | 1                                      | N                                   |
| RHOC         | 0.885646964                            | N                                            | 12                                     | N                                   |
| RHOF         | 0.885646964                            | N                                            | 0                                      | N                                   |
| TIA1         | 0.885646964                            | N                                            | 4                                      | N                                   |
| RPS21        | 0.885742421                            | N                                            | 0                                      | N                                   |
| AL953862.1   | 0.885957102                            | N                                            | 0                                      | N                                   |
| ITPRIP       | 0.885957102                            | N                                            | 0                                      | N                                   |
| MMS19        | 0.885957102                            | N                                            | 0                                      | N                                   |
| PIWIL1       | 0.885957102                            | N                                            | 2                                      | N                                   |
| AC130462.1   | 0.885972174                            | N                                            | 0                                      | N                                   |
| ADGRE5       | 0.886003923                            | N                                            | 2                                      | N                                   |
| AL512791.2   | 0.886003923                            | N                                            | 0                                      | N                                   |
| CD226        | 0.886003923                            | N                                            | 3                                      | N                                   |
| DNM2         | 0.886003923                            | N                                            | 0                                      | N                                   |
| HSPE1P11     | 0.886003923                            | N                                            | 0                                      | N                                   |
| RN7SKP11     | 0.886003923                            | N                                            | 0                                      | N                                   |
| RPL37AP1     | 0.886003923                            | N                                            | 0                                      | N                                   |
| STC1         | 0.886003923                            | N                                            | 16                                     | N                                   |
| LINC01006    | 0.886041495                            | N                                            | 0                                      | N                                   |
| WNK3         | 0.886041495                            | N                                            | 0                                      | N                                   |
| KCND1        | 0.886080536                            | N                                            | 0                                      | N                                   |
| AC079414.3   | 0.886157251                            | N                                            | 0                                      | N                                   |
| RN7SL274P    | 0.886157251                            | N                                            | 0                                      | N                                   |
| ISG20        | 0.886165992                            | N                                            | 1                                      | N                                   |
| NRK          | 0.886176535                            | N                                            | 64                                     | N                                   |
| AC040970.1   | 0.886223282                            | N                                            | 0                                      | N                                   |
| AL355816.2   | 0.886223282                            | N                                            | 0                                      | N                                   |
| SCARNA18     | 0.886247326                            | N                                            | 0                                      | N                                   |
| AC009229.4   | 0.886251191                            | N                                            | 0                                      | N                                   |
| AC010904.1   | 0.886251191                            | N                                            | 0                                      | N                                   |
| AC011498.4   | 0.886251191                            | N                                            | 0                                      | N                                   |
| AC097534.1   | 0.886251191                            | N                                            | 0                                      | N                                   |
| AC100861.1   | 0.886251191                            | N                                            | 0                                      | N                                   |
| GAL          | 0.886251191                            | N                                            | 278                                    | Y                                   |
| LINC02024    | 0.886251191                            | N                                            | 0                                      | N                                   |
| MFSD12       | 0.886251191                            | N                                            | 0                                      | N                                   |
| NSDHL        | 0.886251191                            | N                                            | 0                                      | N                                   |
| ONECUT3      | 0.886251191                            | N                                            | 1                                      | N                                   |
| RBM23        | 0.886251191                            | N                                            | 0                                      | N                                   |
| RP1-309I22.2 | 0.886251191                            | N                                            | 0                                      | N                                   |
| RPN2         | 0.886251191                            | N                                            | 1                                      | N                                   |
| RPS20P22     | 0.886251191                            | N                                            | 0                                      | N                                   |
| RPS27L       | 0.886251191                            | N                                            | 0                                      | N                                   |
| SERPINF2     | 0.886251191                            | N                                            | 0                                      | N                                   |
| ZNF445       | 0.886251191                            | N                                            | 0                                      | N                                   |
| TMEM204      | 0.886267297                            | N                                            | 0                                      | N                                   |
| SRP54        | 0.886472663                            | N                                            | 0                                      | N                                   |
| AC099063.2   | 0.886473159                            | N                                            | 0                                      | N                                   |
| TPM3P7       | 0.886564074                            | N                                            | 0                                      | N                                   |
| OST4         | 0.886569837                            | N                                            | 0                                      | N                                   |
| MMRN2        | 0.88661146                             | N                                            | 0                                      | N                                   |
| AL691432.2   | 0.886643348                            | N                                            | 0                                      | N                                   |
| NUDT16       | 0.8868998                              | N                                            | 0                                      | N                                   |
| COPS9        | 0.886928666                            | N                                            | 0                                      | N                                   |
| AC103810.1   | 0.88699474                             | N                                            | 0                                      | N                                   |
| CCDC39       | 0.88699474                             | N                                            | 0                                      | N                                   |

| Gene symbols | FDR (differential expression analysis) | Differentially expressed gene? Y, Yes; N, No | Number of insulin related publications | Insulin related gene? Y, Yes; N, No |
|--------------|----------------------------------------|----------------------------------------------|----------------------------------------|-------------------------------------|
| ICE2P1       | 0.88699474                             | N                                            | 0                                      | N                                   |
| TIAM2        | 0.88699474                             | N                                            | 0                                      | N                                   |
| AC109587.1   | 0.887125945                            | N                                            | 0                                      | N                                   |
| AP002414.3   | 0.887125945                            | N                                            | 0                                      | N                                   |
| ASXL3        | 0.887125945                            | N                                            | 2                                      | N                                   |
| ST3GAL6-AS1  | 0.887125945                            | N                                            | 0                                      | N                                   |
| AL132989.1   | 0.887165998                            | N                                            | 0                                      | N                                   |
| AC012158.1   | 0.887248866                            | N                                            | 0                                      | N                                   |
| C1orf109     | 0.887248866                            | N                                            | 0                                      | N                                   |
| MOB4         | 0.887248866                            | N                                            | 1                                      | N                                   |
| CLIC6        | 0.887255783                            | N                                            | 1                                      | N                                   |
| ABRACL       | 0.887263562                            | N                                            | 0                                      | N                                   |
| AC008536.1   | 0.887263562                            | N                                            | 0                                      | N                                   |
| AL132657.1   | 0.887263562                            | N                                            | 0                                      | N                                   |
| COL6A5       | 0.887263562                            | N                                            | 0                                      | N                                   |
| LINC01105    | 0.887263562                            | N                                            | 0                                      | N                                   |
| MFAP3L       | 0.887263562                            | N                                            | 0                                      | N                                   |
| PCBP4        | 0.887263562                            | N                                            | 0                                      | N                                   |
| RPS10-NUDT3  | 0.887263562                            | N                                            | 0                                      | N                                   |
| SCARB1       | 0.887263562                            | N                                            | 48                                     | N                                   |
| THBD         | 0.887263562                            | N                                            | 12                                     | N                                   |
| LYRM4        | 0.887510645                            | N                                            | 0                                      | N                                   |
| USH1G        | 0.887549177                            | N                                            | 1                                      | N                                   |
| TLN2         | 0.887596556                            | N                                            | 0                                      | N                                   |
| ARSB         | 0.887714759                            | N                                            | 2                                      | N                                   |
| NIT1         | 0.887765632                            | N                                            | 6                                      | N                                   |
| AC080038.1   | 0.887911058                            | N                                            | 0                                      | N                                   |
| ACADVL       | 0.887911058                            | N                                            | 21                                     | N                                   |
| ANP32BP1     | 0.887911058                            | N                                            | 0                                      | N                                   |
| ATP2C2-AS1   | 0.887911058                            | N                                            | 0                                      | N                                   |
| ATP5F1P1     | 0.887911058                            | N                                            | 0                                      | N                                   |
| BDP1P        | 0.887911058                            | N                                            | 0                                      | N                                   |
| CDH5         | 0.887911058                            | N                                            | 3                                      | N                                   |
| CHST8        | 0.887911058                            | N                                            | 0                                      | N                                   |
| DPM2         | 0.887911058                            | N                                            | 0                                      | N                                   |
| DUSP1        | 0.887911058                            | N                                            | 45                                     | N                                   |
| FAM118A      | 0.887911058                            | N                                            | 0                                      | N                                   |
| NDUFS7       | 0.887911058                            | N                                            | 0                                      | N                                   |
| NEK1         | 0.887911058                            | N                                            | 0                                      | N                                   |
| NME1-NME2    | 0.887911058                            | N                                            | 0                                      | N                                   |
| PCDH7        | 0.887911058                            | N                                            | 1                                      | N                                   |
| PON2         | 0.887911058                            | N                                            | 18                                     | N                                   |
| PPP2R1A      | 0.887911058                            | N                                            | 5                                      | N                                   |
| RN7SKP203    | 0.887911058                            | N                                            | 0                                      | N                                   |
| RN7SL362P    | 0.887911058                            | N                                            | 0                                      | N                                   |
| RNF34        | 0.887911058                            | N                                            | 1                                      | N                                   |
| SDSL         | 0.887911058                            | N                                            | 0                                      | N                                   |
| SEC11B       | 0.887911058                            | N                                            | 0                                      | N                                   |
| SELENON      | 0.887911058                            | N                                            | 1                                      | N                                   |
| SIX6         | 0.887911058                            | N                                            | 3                                      | N                                   |
| STC2         | 0.887911058                            | N                                            | 27                                     | N                                   |
| TMEM160      | 0.887911058                            | N                                            | 1                                      | N                                   |
| TNNI3        | 0.887911058                            | N                                            | 1                                      | N                                   |
| UGGT2        | 0.887911058                            | N                                            | 0                                      | N                                   |
| ZFHX4        | 0.887911058                            | N                                            | 0                                      | N                                   |
| SRGAP1       | 0.88794141                             | N                                            | 0                                      | N                                   |
| ACTL8        | 0.88797011                             | N                                            | 0                                      | N                                   |
| ERMP1        | 0.888054499                            | N                                            | 0                                      | N                                   |
| AC090826.2   | 0.888066114                            | N                                            | 0                                      | N                                   |
| AL593856.1   | 0.888066114                            | N                                            | 0                                      | N                                   |
| ATP5L        | 0.888066114                            | N                                            | 1                                      | N                                   |
| LRRC69       | 0.888066114                            | N                                            | 0                                      | N                                   |
| MS4A4E       | 0.888066114                            | N                                            | 0                                      | N                                   |
| SENP7        | 0.888066114                            | N                                            | 0                                      | N                                   |
| SMURF1       | 0.888066114                            | N                                            | 6                                      | N                                   |
| POLR1E       | 0.888149176                            | N                                            | 1                                      | N                                   |

| Gene symbols | FDR (differential expression analysis) | Differentially expressed gene? Y, Yes; N, No | Number of insulin related publications | Insulin related gene? Y, Yes; N, No |
|--------------|----------------------------------------|----------------------------------------------|----------------------------------------|-------------------------------------|
| POM121       | 0.888149176                            | N                                            | 1                                      | N                                   |
| RPS3AP25     | 0.888160748                            | N                                            | 0                                      | N                                   |
| GPR151       | 0.888203497                            | N                                            | 0                                      | N                                   |
| ITGB2        | 0.888216094                            | N                                            | 2                                      | N                                   |
| RPL6         | 0.888229306                            | N                                            | 1                                      | N                                   |
| AL031320.2   | 0.88823923                             | N                                            | 0                                      | N                                   |
| ANXA8L1      | 0.88823923                             | N                                            | 0                                      | N                                   |
| RENBP        | 0.88823923                             | N                                            | 1                                      | N                                   |
| TRAK1        | 0.88823923                             | N                                            | 0                                      | N                                   |
| TXLNA        | 0.88823923                             | N                                            | 0                                      | N                                   |
| CREBZF       | 0.88825168                             | N                                            | 1                                      | N                                   |
| PM20D2       | 0.88836783                             | N                                            | 0                                      | N                                   |
| LINC01553    | 0.888379643                            | N                                            | 0                                      | N                                   |
| ARAP2        | 0.888435382                            | N                                            | 1                                      | N                                   |
| SLC22A31     | 0.888502031                            | N                                            | 0                                      | N                                   |
| ADAT2        | 0.888555897                            | N                                            | 0                                      | N                                   |
| FP325330.3   | 0.888582347                            | N                                            | 0                                      | N                                   |
| AC015871.4   | 0.888612788                            | N                                            | 0                                      | N                                   |
| AL591503.1   | 0.888612788                            | N                                            | 0                                      | N                                   |
| CCNE2        | 0.888612788                            | N                                            | 1                                      | N                                   |
| RPL23AP35    | 0.888612788                            | N                                            | 0                                      | N                                   |
| SYDE2        | 0.888612788                            | N                                            | 0                                      | N                                   |
| AC013444.1   | 0.888623153                            | N                                            | 0                                      | N                                   |
| ACSS2        | 0.888623153                            | N                                            | 6                                      | N                                   |
| AL136982.3   | 0.888623153                            | N                                            | 0                                      | N                                   |
| APOBEC3A     | 0.888623153                            | N                                            | 0                                      | N                                   |
| ARPC4-TTLL3  | 0.888623153                            | N                                            | 0                                      | N                                   |
| AXIN2        | 0.888623153                            | N                                            | 21                                     | N                                   |
| DNAJC19P9    | 0.888623153                            | N                                            | 0                                      | N                                   |
| MNX1         | 0.888623153                            | N                                            | 27                                     | N                                   |
| RAB40C       | 0.888623153                            | N                                            | 0                                      | N                                   |
| SCAP         | 0.888623153                            | N                                            | 70                                     | N                                   |
| TIGIT        | 0.888623153                            | N                                            | 5                                      | N                                   |
| USE1         | 0.888623153                            | N                                            | 0                                      | N                                   |
| ZNRF2P2      | 0.888623153                            | N                                            | 0                                      | N                                   |
| AC133552.5   | 0.88868179                             | N                                            | 0                                      | N                                   |
| KITLG        | 0.88868179                             | N                                            | 6                                      | N                                   |
| MAF1         | 0.888694481                            | N                                            | 5                                      | N                                   |
| USP15        | 0.888694481                            | N                                            | 1                                      | N                                   |
| WDR1         | 0.888694481                            | N                                            | 1                                      | N                                   |
| MARCH3       | 0.888705535                            | N                                            | 0                                      | N                                   |
| AC007389.1   | 0.888705535                            | N                                            | 0                                      | N                                   |
| AC007619.2   | 0.888705535                            | N                                            | 0                                      | N                                   |
| AC079416.2   | 0.888705535                            | N                                            | 0                                      | N                                   |
| AC092368.3   | 0.888705535                            | N                                            | 0                                      | N                                   |
| AC092910.2   | 0.888705535                            | N                                            | 0                                      | N                                   |
| AC096664.2   | 0.888705535                            | N                                            | 0                                      | N                                   |
| AC107021.1   | 0.888705535                            | N                                            | 0                                      | N                                   |
| AC110792.4   | 0.888705535                            | N                                            | 0                                      | N                                   |
| AC124276.1   | 0.888705535                            | N                                            | 0                                      | N                                   |
| AC133919.1   | 0.888705535                            | N                                            | 0                                      | N                                   |
| AC137630.4   | 0.888705535                            | N                                            | 0                                      | N                                   |
| AF274858.3   | 0.888705535                            | N                                            | 0                                      | N                                   |
| AJAP1        | 0.888705535                            | N                                            | 0                                      | N                                   |
| AK2          | 0.888705535                            | N                                            | 5                                      | N                                   |
| AL023802.1   | 0.888705535                            | N                                            | 0                                      | N                                   |
| AL033527.2   | 0.888705535                            | N                                            | 0                                      | N                                   |
| AL158147.2   | 0.888705535                            | N                                            | 0                                      | N                                   |
| AP001453.3   | 0.888705535                            | N                                            | 0                                      | N                                   |
| ATAT1        | 0.888705535                            | N                                            | 0                                      | N                                   |
| C11orf21     | 0.888705535                            | N                                            | 0                                      | N                                   |
| CHRD         | 0.888705535                            | N                                            | 1                                      | N                                   |
| CSGALNACT2   | 0.888705535                            | N                                            | 0                                      | N                                   |
| DCDC2B       | 0.888705535                            | N                                            | 0                                      | N                                   |
| DPH3         | 0.888705535                            | N                                            | 0                                      | N                                   |
| ENTPD1-AS1   | 0.888705535                            | N                                            | 0                                      | N                                   |

| Gene symbols | FDR (differential expression analysis) | Differentially expressed gene? Y, Yes; N, No | Number of insulin related publications | Insulin related gene? Y, Yes; N, No |
|--------------|----------------------------------------|----------------------------------------------|----------------------------------------|-------------------------------------|
| FZD8         | 0.888705535                            | N                                            | 0                                      | N                                   |
| HCG15        | 0.888705535                            | N                                            | 0                                      | N                                   |
| HSPA13       | 0.888705535                            | N                                            | 0                                      | N                                   |
| INTS6-AS1    | 0.888705535                            | N                                            | 0                                      | N                                   |
| ITGA5        | 0.888705535                            | N                                            | 3                                      | N                                   |
| LRG1         | 0.888705535                            | N                                            | 6                                      | N                                   |
| LY9          | 0.888705535                            | N                                            | 2                                      | N                                   |
| MAN1A2P1     | 0.888705535                            | N                                            | 0                                      | N                                   |
| MSRA         | 0.888705535                            | N                                            | 8                                      | N                                   |
| NR3C2        | 0.888705535                            | N                                            | 11                                     | N                                   |
| PDE6B        | 0.888705535                            | N                                            | 3                                      | N                                   |
| PFKP         | 0.888705535                            | N                                            | 3                                      | N                                   |
| PRKAR1B      | 0.888705535                            | N                                            | 0                                      | N                                   |
| RFPL4B       | 0.888705535                            | N                                            | 0                                      | N                                   |
| RN7SL558P    | 0.888705535                            | N                                            | 0                                      | N                                   |
| RN7SL751P    | 0.888705535                            | N                                            | 0                                      | N                                   |
| RTN4RL1      | 0.888705535                            | N                                            | 0                                      | N                                   |
| SDK1         | 0.888705535                            | N                                            | 1                                      | N                                   |
| SEMA3A       | 0.888705535                            | N                                            | 4                                      | N                                   |
| SLC50A1      | 0.888705535                            | N                                            | 1                                      | N                                   |
| SMC5         | 0.888705535                            | N                                            | 1                                      | N                                   |
| TERF1        | 0.888705535                            | N                                            | 1                                      | N                                   |
| TLR4         | 0.888705535                            | N                                            | 564                                    | Y                                   |
| TOR1A        | 0.888705535                            | N                                            | 0                                      | N                                   |
| TPM2         | 0.888705535                            | N                                            | 0                                      | N                                   |
| TRIM68       | 0.888705535                            | N                                            | 0                                      | N                                   |
| ZNF431       | 0.888705535                            | N                                            | 0                                      | N                                   |
| AL138752.2   | 0.888745977                            | N                                            | 0                                      | N                                   |
| RGPD4-AS1    | 0.888745977                            | N                                            | 0                                      | N                                   |
| ZIK1P1       | 0.888745977                            | N                                            | 0                                      | N                                   |
| AL359094.1   | 0.88887362                             | N                                            | 0                                      | N                                   |
| TTC5         | 0.88887362                             | N                                            | 0                                      | N                                   |
| ARHGEF10L    | 0.888987517                            | N                                            | 0                                      | N                                   |
| EYA3         | 0.888987517                            | N                                            | 0                                      | N                                   |
| GPM6B        | 0.888987517                            | N                                            | 0                                      | N                                   |
| SCRT1        | 0.888987517                            | N                                            | 0                                      | N                                   |
| USP48        | 0.888987517                            | N                                            | 0                                      | N                                   |
| ZNF45        | 0.888987517                            | N                                            | 0                                      | N                                   |
| ECI1         | 0.889013531                            | N                                            | 0                                      | N                                   |
| RNF24        | 0.889092553                            | N                                            | 1                                      | N                                   |
| SCARNA2      | 0.889092553                            | N                                            | 0                                      | N                                   |
| AC010999.2   | 0.889226754                            | N                                            | 0                                      | N                                   |
| AL023806.1   | 0.889226754                            | N                                            | 0                                      | N                                   |
| MPI          | 0.889226754                            | N                                            | 76                                     | N                                   |
| SLC52A1      | 0.889226754                            | N                                            | 0                                      | N                                   |
| SNORA71C     | 0.889226754                            | N                                            | 0                                      | N                                   |
| ABCB4        | 0.889606553                            | N                                            | 5                                      | N                                   |
| AC012100.3   | 0.889606553                            | N                                            | 0                                      | N                                   |
| AGAP11       | 0.889606553                            | N                                            | 0                                      | N                                   |
| AL161454.1   | 0.889606553                            | N                                            | 0                                      | N                                   |
| BCKDK        | 0.889606553                            | N                                            | 4                                      | N                                   |
| C2CD2        | 0.889606553                            | N                                            | 0                                      | N                                   |
| COX6CP1      | 0.889606553                            | N                                            | 0                                      | N                                   |
| DDX3P3       | 0.889606553                            | N                                            | 0                                      | N                                   |
| GOLGA8IP     | 0.889606553                            | N                                            | 0                                      | N                                   |
| IRS3P        | 0.889606553                            | N                                            | 22                                     | N                                   |
| KCTD3        | 0.889606553                            | N                                            | 0                                      | N                                   |
| PLCD1        | 0.889606553                            | N                                            | 4                                      | N                                   |
| PRRG4        | 0.889606553                            | N                                            | 1                                      | N                                   |
| RN7SKP281    | 0.889606553                            | N                                            | 0                                      | N                                   |
| SAMD14       | 0.889606553                            | N                                            | 0                                      | N                                   |
| SERPINB9     | 0.889606553                            | N                                            | 1                                      | N                                   |
| WBP11P1      | 0.889606553                            | N                                            | 0                                      | N                                   |
| WDPCP        | 0.889606553                            | N                                            | 0                                      | N                                   |
| ZNF217       | 0.889606553                            | N                                            | 2                                      | N                                   |
| AKTIP        | 0.889628732                            | N                                            | 3                                      | N                                   |

| Gene symbols | FDR (differential expression analysis) | Differentially expressed gene? Y, Yes; N, No | Number of insulin related publications | Insulin related gene? Y, Yes; N, No |
|--------------|----------------------------------------|----------------------------------------------|----------------------------------------|-------------------------------------|
| AC090970.3   | 0.889669381                            | N                                            | 0                                      | N                                   |
| AL590762.3   | 0.889669381                            | N                                            | 0                                      | N                                   |
| SMLR1        | 0.889669381                            | N                                            | 0                                      | N                                   |
| AC012313.3   | 0.88971569                             | N                                            | 0                                      | N                                   |
| ACP2         | 0.88971569                             | N                                            | 3                                      | N                                   |
| ACSM3        | 0.88971569                             | N                                            | 4                                      | N                                   |
| AL590235.1   | 0.88971569                             | N                                            | 0                                      | N                                   |
| AL928654.1   | 0.88971569                             | N                                            | 0                                      | N                                   |
| BMP2         | 0.88971569                             | N                                            | 189                                    | Y                                   |
| CXCL16       | 0.88971569                             | N                                            | 12                                     | N                                   |
| FKBP15       | 0.88971569                             | N                                            | 0                                      | N                                   |
| HEY1         | 0.88971569                             | N                                            | 5                                      | N                                   |
| LINC00861    | 0.88971569                             | N                                            | 0                                      | N                                   |
| LINC01993    | 0.88971569                             | N                                            | 0                                      | N                                   |
| MCTS2P       | 0.88971569                             | N                                            | 0                                      | N                                   |
| NAA30        | 0.88971569                             | N                                            | 0                                      | N                                   |
| NBPF9        | 0.88971569                             | N                                            | 0                                      | N                                   |
| PCOLCE       | 0.88971569                             | N                                            | 6                                      | N                                   |
| ZNF536       | 0.88971569                             | N                                            | 0                                      | N                                   |
| CHST15       | 0.889764852                            | N                                            | 0                                      | N                                   |
| FAM174B      | 0.889764852                            | N                                            | 0                                      | N                                   |
| AP002770.1   | 0.889795648                            | N                                            | 0                                      | N                                   |
| CIAO1        | 0.889795648                            | N                                            | 0                                      | N                                   |
| DHDDS        | 0.889795648                            | N                                            | 0                                      | N                                   |
| MED8         | 0.889795648                            | N                                            | 0                                      | N                                   |
| NSUN5P2      | 0.889795648                            | N                                            | 0                                      | N                                   |
| PSMD3        | 0.889795648                            | N                                            | 1                                      | N                                   |
| TENM1        | 0.889795648                            | N                                            | 0                                      | N                                   |
| AC074019.1   | 0.889804492                            | N                                            | 0                                      | N                                   |
| AC009318.4   | 0.889867622                            | N                                            | 0                                      | N                                   |
| TTC30B       | 0.889867622                            | N                                            | 0                                      | N                                   |
| AC007875.3   | 0.889871764                            | N                                            | 0                                      | N                                   |
| RN7SL30P     | 0.889871764                            | N                                            | 0                                      | N                                   |
| AL355581.1   | 0.889964511                            | N                                            | 0                                      | N                                   |
| RPL10P9      | 0.889964511                            | N                                            | 0                                      | N                                   |
| TAPT1-AS1    | 0.889964511                            | N                                            | 0                                      | N                                   |
| ABL2         | 0.890191398                            | N                                            | 0                                      | N                                   |
| LINC00116    | 0.890191398                            | N                                            | 0                                      | N                                   |
| MAGEL2       | 0.890191398                            | N                                            | 4                                      | N                                   |
| PPM1M        | 0.890191398                            | N                                            | 0                                      | N                                   |
| SCAND3P1     | 0.890191398                            | N                                            | 0                                      | N                                   |
| Z98885.3     | 0.890191398                            | N                                            | 0                                      | N                                   |
| AP002360.4   | 0.890271371                            | N                                            | 0                                      | N                                   |
| PLA2G16      | 0.890271371                            | N                                            | 3                                      | N                                   |
| VGLL4        | 0.890271371                            | N                                            | 0                                      | N                                   |
| AC005258.1   | 0.890278294                            | N                                            | 0                                      | N                                   |
| DNHD1        | 0.890278294                            | N                                            | 0                                      | N                                   |
| NR5A2        | 0.890278294                            | N                                            | 22                                     | N                                   |
| GPR182       | 0.89036173                             | N                                            | 0                                      | N                                   |
| AC036108.3   | 0.890449466                            | N                                            | 0                                      | N                                   |
| ORAI2        | 0.890449466                            | N                                            | 2                                      | N                                   |
| PDLIM5       | 0.890449466                            | N                                            | 0                                      | N                                   |
| BHLHE22      | 0.890767963                            | N                                            | 3                                      | N                                   |
| GUSBP6       | 0.890767963                            | N                                            | 0                                      | N                                   |
| SMG1P4       | 0.890767963                            | N                                            | 0                                      | N                                   |
| MPZ          | 0.890976818                            | N                                            | 4                                      | N                                   |
| SEPT14       | 0.891229347                            | N                                            | 0                                      | N                                   |
| AARSD1       | 0.891229347                            | N                                            | 0                                      | N                                   |
| AC006449.2   | 0.891229347                            | N                                            | 0                                      | N                                   |
| AC012615.6   | 0.891229347                            | N                                            | 0                                      | N                                   |
| C9orf147     | 0.891229347                            | N                                            | 0                                      | N                                   |
| GATC         | 0.891229347                            | N                                            | 1                                      | N                                   |
| ZNF497       | 0.891229347                            | N                                            | 0                                      | N                                   |
| BTBD3        | 0.891239531                            | N                                            | 0                                      | N                                   |
| HES5         | 0.891239531                            | N                                            | 7                                      | N                                   |
| LRRC37A6P    | 0.891239531                            | N                                            | 0                                      | N                                   |

| Gene symbols | FDR (differential expression analysis) | Differentially expressed gene? Y, Yes; N, No | Number of insulin related publications | Insulin related gene? Y, Yes; N, No |
|--------------|----------------------------------------|----------------------------------------------|----------------------------------------|-------------------------------------|
| RN7SKP30     | 0.891239531                            | N                                            | 0                                      | N                                   |
| B4GALNT1     | 0.891298132                            | N                                            | 1                                      | N                                   |
| AP4S1        | 0.891306698                            | N                                            | 0                                      | N                                   |
| LINC01239    | 0.891320678                            | N                                            | 0                                      | N                                   |
| AL158064.1   | 0.891349034                            | N                                            | 0                                      | N                                   |
| CASP1        | 0.891480169                            | N                                            | 9                                      | N                                   |
| RNF207       | 0.891492916                            | N                                            | 0                                      | N                                   |
| AJ239328.1   | 0.891525798                            | N                                            | 0                                      | N                                   |
| DBI          | 0.891525798                            | N                                            | 40                                     | N                                   |
| LINC01550    | 0.891525798                            | N                                            | 0                                      | N                                   |
| LSM14A       | 0.891525798                            | N                                            | 0                                      | N                                   |
| PDE1B        | 0.891525798                            | N                                            | 2                                      | N                                   |
| PLAUR        | 0.891525798                            | N                                            | 27                                     | N                                   |
| PRPF39       | 0.891525798                            | N                                            | 0                                      | N                                   |
| RANBP20P     | 0.891525798                            | N                                            | 0                                      | N                                   |
| SCARNA1      | 0.891525798                            | N                                            | 0                                      | N                                   |
| TRPV2        | 0.891525798                            | N                                            | 24                                     | N                                   |
| YBX1P1       | 0.891525798                            | N                                            | 0                                      | N                                   |
| CUEDC1       | 0.891563507                            | N                                            | 0                                      | N                                   |
| VASH2        | 0.891563507                            | N                                            | 1                                      | N                                   |
| IPMKP1       | 0.891647871                            | N                                            | 0                                      | N                                   |
| AL136295.3   | 0.891667779                            | N                                            | 0                                      | N                                   |
| CCDC59       | 0.891667779                            | N                                            | 0                                      | N                                   |
| FUT7         | 0.891667779                            | N                                            | 3                                      | N                                   |
| GCF2         | 0.891667779                            | N                                            | 3                                      | N                                   |
| IFIT5        | 0.891667779                            | N                                            | 0                                      | N                                   |
| AC016355.1   | 0.89167098                             | N                                            | 0                                      | N                                   |
| GZF1         | 0.89167098                             | N                                            | 0                                      | N                                   |
| LAMTOR1      | 0.89167098                             | N                                            | 2                                      | N                                   |
| LYSMD3       | 0.89167098                             | N                                            | 0                                      | N                                   |
| MAOB         | 0.89167098                             | N                                            | 7                                      | N                                   |
| PLXNA4       | 0.89167098                             | N                                            | 0                                      | N                                   |
| ZNF492       | 0.89167098                             | N                                            | 0                                      | N                                   |
| Metazoa_SRP  | 0.891707312                            | N                                            | 0                                      | N                                   |
| RBM22P2      | 0.891707312                            | N                                            | 0                                      | N                                   |
| USP9Y        | 0.891712397                            | N                                            | 1                                      | N                                   |
| ABHD15       | 0.891844486                            | N                                            | 3                                      | N                                   |
| AC005915.1   | 0.891844486                            | N                                            | 0                                      | N                                   |
| AP001330.1   | 0.891844486                            | N                                            | 0                                      | N                                   |
| NEMF         | 0.891844486                            | N                                            | 1                                      | N                                   |
| RPL36        | 0.891844486                            | N                                            | 0                                      | N                                   |
| SLC36A3      | 0.891844486                            | N                                            | 0                                      | N                                   |
| TNFRSF14     | 0.891844486                            | N                                            | 3                                      | N                                   |
| TRA2A        | 0.891844486                            | N                                            | 0                                      | N                                   |
| AC112503.2   | 0.892082331                            | N                                            | 0                                      | N                                   |
| CHORDC1      | 0.892082331                            | N                                            | 0                                      | N                                   |
| OSGIN1       | 0.892082331                            | N                                            | 2                                      | N                                   |
| AL354707.1   | 0.89240401                             | N                                            | 0                                      | N                                   |
| PATZ1        | 0.89240401                             | N                                            | 0                                      | N                                   |
| SENCR        | 0.89240401                             | N                                            | 0                                      | N                                   |
| ATP1A1       | 0.892417839                            | N                                            | 6                                      | N                                   |
| AC003002.4   | 0.89248573                             | N                                            | 0                                      | N                                   |
| C15orf56     | 0.89248573                             | N                                            | 0                                      | N                                   |
| C3orf18      | 0.89248573                             | N                                            | 0                                      | N                                   |
| CENPBD1P1    | 0.89248573                             | N                                            | 0                                      | N                                   |
| GDPD5        | 0.89248573                             | N                                            | 1                                      | N                                   |
| GIT1         | 0.89248573                             | N                                            | 0                                      | N                                   |
| HSPD1P4      | 0.89248573                             | N                                            | 0                                      | N                                   |
| LINC01179    | 0.89248573                             | N                                            | 0                                      | N                                   |
| SFTPD-AS1    | 0.89248573                             | N                                            | 0                                      | N                                   |
| AC009812.3   | 0.892573774                            | N                                            | 0                                      | N                                   |
| ANKMY1       | 0.892573774                            | N                                            | 0                                      | N                                   |
| HSPA1A       | 0.892573774                            | N                                            | 11                                     | N                                   |
| LINC01776    | 0.892573774                            | N                                            | 0                                      | N                                   |
| TMEM50B      | 0.892573774                            | N                                            | 0                                      | N                                   |
| VIM-AS1      | 0.892573774                            | N                                            | 0                                      | N                                   |

| Gene symbols  | FDR (differential expression analysis) | Differentially expressed gene? Y, Yes; N, No | Number of insulin related publications | Insulin related gene? Y, Yes; N, No |
|---------------|----------------------------------------|----------------------------------------------|----------------------------------------|-------------------------------------|
| MICE          | 0.892600237                            | N                                            | 1000                                   | Y                                   |
| LCLAT1        | 0.892623401                            | N                                            | 0                                      | N                                   |
| TAF9B         | 0.892623401                            | N                                            | 0                                      | N                                   |
| CRYZ          | 0.892672362                            | N                                            | 3                                      | N                                   |
| RN7SL328P     | 0.892687711                            | N                                            | 0                                      | N                                   |
| SLC22A3       | 0.892860931                            | N                                            | 7                                      | N                                   |
| AC005546.1    | 0.892891159                            | N                                            | 0                                      | N                                   |
| AL122125.1    | 0.892891159                            | N                                            | 0                                      | N                                   |
| EMC7          | 0.892891159                            | N                                            | 0                                      | N                                   |
| KCNV2         | 0.892891159                            | N                                            | 0                                      | N                                   |
| MRPL38        | 0.892891159                            | N                                            | 0                                      | N                                   |
| STRN          | 0.892891159                            | N                                            | 0                                      | N                                   |
| STXBP3        | 0.892891159                            | N                                            | 19                                     | N                                   |
| GTF2F2P1      | 0.893081484                            | N                                            | 0                                      | N                                   |
| AC091948.1    | 0.893094697                            | N                                            | 0                                      | N                                   |
| AP000350.7    | 0.893135375                            | N                                            | 0                                      | N                                   |
| TCF7          | 0.893135375                            | N                                            | 11                                     | N                                   |
| C9orf139      | 0.893274118                            | N                                            | 0                                      | N                                   |
| CTCFL         | 0.893311223                            | N                                            | 4                                      | N                                   |
| PNPLA6        | 0.893488121                            | N                                            | 1                                      | N                                   |
| SRP72P2       | 0.893488121                            | N                                            | 0                                      | N                                   |
| ACTC1         | 0.89348966                             | N                                            | 1                                      | N                                   |
| DCC           | 0.893601137                            | N                                            | 27                                     | N                                   |
| DIEXF         | 0.893601137                            | N                                            | 0                                      | N                                   |
| SLITRK5       | 0.893601137                            | N                                            | 1                                      | N                                   |
| U40455.1      | 0.893601137                            | N                                            | 0                                      | N                                   |
| ZNF681        | 0.893601137                            | N                                            | 0                                      | N                                   |
| DNAJC19       | 0.893849461                            | N                                            | 0                                      | N                                   |
| AC127502.1    | 0.89392821                             | N                                            | 0                                      | N                                   |
| ZRANB3        | 0.89392821                             | N                                            | 2                                      | N                                   |
| CEPT1         | 0.893936947                            | N                                            | 1                                      | N                                   |
| FDX1P1        | 0.893945867                            | N                                            | 0                                      | N                                   |
| TMEM218       | 0.893964326                            | N                                            | 0                                      | N                                   |
| AC096586.2    | 0.894231002                            | N                                            | 0                                      | N                                   |
| PAK3          | 0.894231002                            | N                                            | 1                                      | N                                   |
| TMEM258       | 0.894231002                            | N                                            | 0                                      | N                                   |
| TRIT1         | 0.894231002                            | N                                            | 0                                      | N                                   |
| LY96          | 0.89441621                             | N                                            | 5                                      | N                                   |
| RHBDL1        | 0.89441621                             | N                                            | 0                                      | N                                   |
| RPS2          | 0.894417923                            | N                                            | 0                                      | N                                   |
| AC080079.1    | 0.894447483                            | N                                            | 0                                      | N                                   |
| AC091144.2    | 0.894447483                            | N                                            | 0                                      | N                                   |
| ATXN2         | 0.894447483                            | N                                            | 6                                      | N                                   |
| C3orf52       | 0.894447483                            | N                                            | 0                                      | N                                   |
| DIDO1         | 0.894447483                            | N                                            | 0                                      | N                                   |
| HEPACAM       | 0.894447483                            | N                                            | 0                                      | N                                   |
| RFNG          | 0.894447483                            | N                                            | 0                                      | N                                   |
| RNASEH2B-AS1  | 0.894447483                            | N                                            | 0                                      | N                                   |
| RP11-206L10.3 | 0.894447483                            | N                                            | 0                                      | N                                   |
| STXBP1        | 0.894447483                            | N                                            | 18                                     | N                                   |
| TMEM115       | 0.894447483                            | N                                            | 0                                      | N                                   |
| TTL4          | 0.894447483                            | N                                            | 0                                      | N                                   |
| CTRC          | 0.894512482                            | N                                            | 4                                      | N                                   |
| LMO7DN        | 0.894550164                            | N                                            | 0                                      | N                                   |
| CLEC7A        | 0.894570977                            | N                                            | 0                                      | N                                   |
| AC078814.1    | 0.894650555                            | N                                            | 0                                      | N                                   |
| AL157400.4    | 0.894650555                            | N                                            | 0                                      | N                                   |
| PRPS1         | 0.894661975                            | N                                            | 2                                      | N                                   |
| ARIH2         | 0.894729005                            | N                                            | 0                                      | N                                   |
| AC007608.4    | 0.894764283                            | N                                            | 0                                      | N                                   |
| AL445649.1    | 0.894764283                            | N                                            | 0                                      | N                                   |
| FLYWCH1       | 0.894764283                            | N                                            | 0                                      | N                                   |
| SUGT1         | 0.894764283                            | N                                            | 0                                      | N                                   |
| ARHGEF17      | 0.894789144                            | N                                            | 0                                      | N                                   |
| RPS7          | 0.894789144                            | N                                            | 0                                      | N                                   |
| AC064801.2    | 0.894856629                            | N                                            | 0                                      | N                                   |



| Gene symbols | FDR (differential expression analysis) | Differentially expressed gene? Y, Yes; N, No | Number of insulin related publications | Insulin related gene? Y, Yes; N, No |
|--------------|----------------------------------------|----------------------------------------------|----------------------------------------|-------------------------------------|
| MADD         | 0.894856629                            | N                                            | 14                                     | N                                   |
| GBGT1        | 0.894862336                            | N                                            | 0                                      | N                                   |
| PCDHB1       | 0.895094366                            | N                                            | 0                                      | N                                   |
| PTAR1        | 0.895094366                            | N                                            | 0                                      | N                                   |
| ZMYND8       | 0.895094366                            | N                                            | 0                                      | N                                   |
| AC004528.1   | 0.895261296                            | N                                            | 0                                      | N                                   |
| IKZF3        | 0.895267862                            | N                                            | 1                                      | N                                   |
| CCDC130      | 0.895321149                            | N                                            | 0                                      | N                                   |
| FAM221A      | 0.895343541                            | N                                            | 0                                      | N                                   |
| ABHD12       | 0.895489569                            | N                                            | 1                                      | N                                   |
| PIGV         | 0.895489569                            | N                                            | 1                                      | N                                   |
| PTPN22       | 0.895489569                            | N                                            | 80                                     | N                                   |
| ZNF843       | 0.895489569                            | N                                            | 0                                      | N                                   |
| ZNF90        | 0.895489569                            | N                                            | 0                                      | N                                   |
| AL133367.1   | 0.895588396                            | N                                            | 0                                      | N                                   |
| HLA-H        | 0.895588396                            | N                                            | 2                                      | N                                   |
| HMGB3P9      | 0.895588396                            | N                                            | 0                                      | N                                   |
| SNTB1        | 0.895588396                            | N                                            | 0                                      | N                                   |
| ZNF330       | 0.895588396                            | N                                            | 0                                      | N                                   |
| CARD8-AS1    | 0.895626735                            | N                                            | 0                                      | N                                   |
| CR382287.2   | 0.895736785                            | N                                            | 0                                      | N                                   |
| RAB13        | 0.895850048                            | N                                            | 8                                      | N                                   |
| RNF128       | 0.895899679                            | N                                            | 2                                      | N                                   |
| TMC3-AS1     | 0.895899679                            | N                                            | 0                                      | N                                   |
| AC006978.2   | 0.896072923                            | N                                            | 0                                      | N                                   |
| AC009065.8   | 0.896072923                            | N                                            | 0                                      | N                                   |
| AC009118.3   | 0.896072923                            | N                                            | 0                                      | N                                   |
| AC092171.2   | 0.896072923                            | N                                            | 0                                      | N                                   |
| RCBTB2P1     | 0.896072923                            | N                                            | 0                                      | N                                   |
| SEMA6D       | 0.896072923                            | N                                            | 0                                      | N                                   |
| RAB3D        | 0.896162212                            | N                                            | 8                                      | N                                   |
| AC007041.1   | 0.896177223                            | N                                            | 0                                      | N                                   |
| AL358472.2   | 0.896177223                            | N                                            | 0                                      | N                                   |
| COG8         | 0.896177223                            | N                                            | 0                                      | N                                   |
| FAM26E       | 0.896177223                            | N                                            | 0                                      | N                                   |
| LENG8-AS1    | 0.896177223                            | N                                            | 0                                      | N                                   |
| LSS          | 0.896177223                            | N                                            | 19                                     | N                                   |
| NECTIN3      | 0.896177223                            | N                                            | 0                                      | N                                   |
| NONOP2       | 0.896177223                            | N                                            | 0                                      | N                                   |
| SLC25A44     | 0.896177223                            | N                                            | 0                                      | N                                   |
| UBALD1       | 0.896177223                            | N                                            | 0                                      | N                                   |
| AC090197.1   | 0.896230162                            | N                                            | 0                                      | N                                   |
| FPGT         | 0.896230162                            | N                                            | 0                                      | N                                   |
| THOC2        | 0.896230162                            | N                                            | 0                                      | N                                   |
| AC091132.4   | 0.896295896                            | N                                            | 0                                      | N                                   |
| AL356020.1   | 0.896295896                            | N                                            | 0                                      | N                                   |
| AXL          | 0.896295896                            | N                                            | 38                                     | N                                   |
| DNAL4        | 0.896295896                            | N                                            | 0                                      | N                                   |
| FO393409.1   | 0.896295896                            | N                                            | 0                                      | N                                   |
| KLRA1P       | 0.896295896                            | N                                            | 0                                      | N                                   |
| MICU2        | 0.896295896                            | N                                            | 1                                      | N                                   |
| SPACA6       | 0.896295896                            | N                                            | 0                                      | N                                   |
| SPDYE3       | 0.896295896                            | N                                            | 0                                      | N                                   |
| TCP10        | 0.896295896                            | N                                            | 0                                      | N                                   |
| TNFRSF9      | 0.896295896                            | N                                            | 9                                      | N                                   |
| PPIA         | 0.896359186                            | N                                            | 11                                     | N                                   |
| TNFAIP6      | 0.896420373                            | N                                            | 8                                      | N                                   |
| C1QTNF7      | 0.896511648                            | N                                            | 0                                      | N                                   |
| FGFRL1       | 0.896511648                            | N                                            | 4                                      | N                                   |
| FZD1         | 0.896511648                            | N                                            | 4                                      | N                                   |
| NECAB3       | 0.896511648                            | N                                            | 0                                      | N                                   |
| SLC25A4      | 0.896511648                            | N                                            | 2                                      | N                                   |
| AC079922.2   | 0.896514305                            | N                                            | 0                                      | N                                   |
| B4GALNT3     | 0.896514305                            | N                                            | 0                                      | N                                   |
| PACS2        | 0.896514305                            | N                                            | 5                                      | N                                   |
| AC004846.2   | 0.89652523                             | N                                            | 0                                      | N                                   |

| Gene symbols | FDR (differential expression analysis) | Differentially expressed gene? Y, Yes; N, No | Number of insulin related publications | Insulin related gene? Y, Yes; N, No |
|--------------|----------------------------------------|----------------------------------------------|----------------------------------------|-------------------------------------|
| CAVI         | 0.89652523                             | N                                            | 188                                    | Y                                   |
| RAX2         | 0.89652523                             | N                                            | 0                                      | N                                   |
| LCAT         | 0.89656633                             | N                                            | 93                                     | N                                   |
| NCKAP1       | 0.89656925                             | N                                            | 0                                      | N                                   |
| HSDL1        | 0.896589171                            | N                                            | 1                                      | N                                   |
| SPOCD1       | 0.896608108                            | N                                            | 0                                      | N                                   |
| AL121748.2   | 0.896799135                            | N                                            | 0                                      | N                                   |
| PRTG         | 0.896799135                            | N                                            | 0                                      | N                                   |
| KCNA5        | 0.896878037                            | N                                            | 5                                      | N                                   |
| RAB5CP2      | 0.896878037                            | N                                            | 0                                      | N                                   |
| AC010894.2   | 0.896958152                            | N                                            | 0                                      | N                                   |
| AL031058.1   | 0.896958152                            | N                                            | 0                                      | N                                   |
| ATG16L2      | 0.896958152                            | N                                            | 0                                      | N                                   |
| HAGHL        | 0.896958152                            | N                                            | 0                                      | N                                   |
| OR2A1-AS1    | 0.896958152                            | N                                            | 0                                      | N                                   |
| TSPOAP1-AS1  | 0.896958152                            | N                                            | 0                                      | N                                   |
| ZC3HAV1L     | 0.896958152                            | N                                            | 0                                      | N                                   |
| AL353801.3   | 0.89698415                             | N                                            | 0                                      | N                                   |
| AC073896.2   | 0.89725356                             | N                                            | 0                                      | N                                   |
| ARL9         | 0.89725356                             | N                                            | 0                                      | N                                   |
| NEU4         | 0.89725356                             | N                                            | 2                                      | N                                   |
| RPL23AP53    | 0.89725356                             | N                                            | 0                                      | N                                   |
| SETD1B       | 0.89725356                             | N                                            | 0                                      | N                                   |
| ZNF333       | 0.89725356                             | N                                            | 0                                      | N                                   |
| POLR3G       | 0.897398365                            | N                                            | 0                                      | N                                   |
| AC087294.1   | 0.897471632                            | N                                            | 0                                      | N                                   |
| BOD1L1       | 0.897471632                            | N                                            | 0                                      | N                                   |
| HADH         | 0.897471632                            | N                                            | 53                                     | N                                   |
| KIF2A        | 0.897471632                            | N                                            | 1                                      | N                                   |
| ERICH1       | 0.897484986                            | N                                            | 0                                      | N                                   |
| GAL3ST4      | 0.897484986                            | N                                            | 0                                      | N                                   |
| FAR2         | 0.897486879                            | N                                            | 1                                      | N                                   |
| PDE6D        | 0.897486879                            | N                                            | 1                                      | N                                   |
| AC136475.5   | 0.897649279                            | N                                            | 0                                      | N                                   |
| MAPK11       | 0.897649279                            | N                                            | 1                                      | N                                   |
| Z95114.3     | 0.897649279                            | N                                            | 0                                      | N                                   |
| AC008771.1   | 0.89786316                             | N                                            | 0                                      | N                                   |
| AC099329.2   | 0.89786316                             | N                                            | 0                                      | N                                   |
| DNAJC5B      | 0.89786316                             | N                                            | 0                                      | N                                   |
| SIM2         | 0.897890548                            | N                                            | 0                                      | N                                   |
| AL139089.1   | 0.897946186                            | N                                            | 0                                      | N                                   |
| RPS29        | 0.897946186                            | N                                            | 0                                      | N                                   |
| PANK1        | 0.897956666                            | N                                            | 3                                      | N                                   |
| PPA1         | 0.897956666                            | N                                            | 1                                      | N                                   |
| CMTM6        | 0.897957651                            | N                                            | 0                                      | N                                   |
| AC111000.4   | 0.898019219                            | N                                            | 0                                      | N                                   |
| AC136944.1   | 0.898019219                            | N                                            | 0                                      | N                                   |
| AL133279.3   | 0.898019219                            | N                                            | 0                                      | N                                   |
| AL359736.1   | 0.898019219                            | N                                            | 0                                      | N                                   |
| AL513475.2   | 0.898019219                            | N                                            | 0                                      | N                                   |
| AP005329.1   | 0.898019219                            | N                                            | 0                                      | N                                   |
| BIRC2        | 0.898019219                            | N                                            | 7                                      | N                                   |
| BX284613.1   | 0.898019219                            | N                                            | 0                                      | N                                   |
| CALM1P1      | 0.898019219                            | N                                            | 0                                      | N                                   |
| LINC01085    | 0.898019219                            | N                                            | 0                                      | N                                   |
| LRRC47       | 0.898019219                            | N                                            | 0                                      | N                                   |
| MYBBP1A      | 0.898019219                            | N                                            | 4                                      | N                                   |
| NME2P1       | 0.898019219                            | N                                            | 0                                      | N                                   |
| NOP14-AS1    | 0.898019219                            | N                                            | 0                                      | N                                   |
| PCED1B-AS1   | 0.898019219                            | N                                            | 0                                      | N                                   |
| PFDN1        | 0.898019219                            | N                                            | 0                                      | N                                   |
| PPP1R12A     | 0.898019219                            | N                                            | 15                                     | N                                   |
| RPL23P2      | 0.898019219                            | N                                            | 0                                      | N                                   |
| SLC29A3      | 0.898019219                            | N                                            | 18                                     | N                                   |
| TSSK4        | 0.898019219                            | N                                            | 0                                      | N                                   |
| ERCC2        | 0.898069767                            | N                                            | 6                                      | N                                   |

| Gene symbols | FDR (differential expression analysis) | Differentially expressed gene? Y, Yes; N, No | Number of insulin related publications | Insulin related gene? Y, Yes; N, No |
|--------------|----------------------------------------|----------------------------------------------|----------------------------------------|-------------------------------------|
| MBOAT2       | 0.89807556                             | N                                            | 0                                      | N                                   |
| AC087257.1   | 0.898082539                            | N                                            | 0                                      | N                                   |
| TCEAL2       | 0.898142515                            | N                                            | 0                                      | N                                   |
| AC007614.6   | 0.898280591                            | N                                            | 0                                      | N                                   |
| AFDN         | 0.898280591                            | N                                            | 0                                      | N                                   |
| AL031594.1   | 0.898280591                            | N                                            | 0                                      | N                                   |
| ANK3         | 0.898280591                            | N                                            | 0                                      | N                                   |
| ATP5G2P4     | 0.898280591                            | N                                            | 0                                      | N                                   |
| C8orf58      | 0.898280591                            | N                                            | 0                                      | N                                   |
| CLNS1AP1     | 0.898280591                            | N                                            | 0                                      | N                                   |
| COP55        | 0.898280591                            | N                                            | 1                                      | N                                   |
| FLJ30679     | 0.898280591                            | N                                            | 0                                      | N                                   |
| GIGYF2       | 0.898280591                            | N                                            | 6                                      | N                                   |
| MCMD2C2      | 0.898280591                            | N                                            | 0                                      | N                                   |
| NDUFB7       | 0.898280591                            | N                                            | 2                                      | N                                   |
| PCAT19       | 0.898280591                            | N                                            | 0                                      | N                                   |
| PRELP        | 0.898280591                            | N                                            | 3                                      | N                                   |
| SENP8        | 0.898280591                            | N                                            | 0                                      | N                                   |
| SNX7         | 0.898280591                            | N                                            | 1                                      | N                                   |
| ZACN         | 0.898280591                            | N                                            | 0                                      | N                                   |
| NDP          | 0.898318624                            | N                                            | 23                                     | N                                   |
| STK10        | 0.898318624                            | N                                            | 0                                      | N                                   |
| AL645608.1   | 0.898338272                            | N                                            | 0                                      | N                                   |
| MMP25        | 0.898338272                            | N                                            | 0                                      | N                                   |
| TLDC1        | 0.898338272                            | N                                            | 0                                      | N                                   |
| KIAA1143     | 0.898366739                            | N                                            | 0                                      | N                                   |
| EDF1         | 0.898368766                            | N                                            | 1                                      | N                                   |
| AC009159.4   | 0.898473966                            | N                                            | 0                                      | N                                   |
| AC106795.2   | 0.898473966                            | N                                            | 0                                      | N                                   |
| GTF2H2       | 0.898473966                            | N                                            | 0                                      | N                                   |
| LINC01336    | 0.898473966                            | N                                            | 0                                      | N                                   |
| LRRC56       | 0.898473966                            | N                                            | 0                                      | N                                   |
| PARP4        | 0.898473966                            | N                                            | 0                                      | N                                   |
| PAX2         | 0.898473966                            | N                                            | 23                                     | N                                   |
| RP1-506.6    | 0.898473966                            | N                                            | 0                                      | N                                   |
| SDE2         | 0.898473966                            | N                                            | 0                                      | N                                   |
| TMEM168      | 0.898473966                            | N                                            | 0                                      | N                                   |
| UQCRQ        | 0.898473966                            | N                                            | 1                                      | N                                   |
| CEP162       | 0.898725288                            | N                                            | 0                                      | N                                   |
| ALG14        | 0.898751453                            | N                                            | 0                                      | N                                   |
| MFSD14B      | 0.898751453                            | N                                            | 0                                      | N                                   |
| SELENOT      | 0.898751453                            | N                                            | 1                                      | N                                   |
| AL049829.3   | 0.898885059                            | N                                            | 0                                      | N                                   |
| ZSCAN16-AS1  | 0.898885059                            | N                                            | 0                                      | N                                   |
| AC024257.3   | 0.89894784                             | N                                            | 0                                      | N                                   |
| AL365475.1   | 0.89894784                             | N                                            | 0                                      | N                                   |
| CHST10       | 0.89894784                             | N                                            | 0                                      | N                                   |
| LINC02175    | 0.89894784                             | N                                            | 0                                      | N                                   |
| DOC2B        | 0.898960045                            | N                                            | 16                                     | N                                   |
| TRIM62       | 0.898960045                            | N                                            | 0                                      | N                                   |
| TSPYL1       | 0.898960045                            | N                                            | 0                                      | N                                   |
| YIPF1        | 0.898960045                            | N                                            | 0                                      | N                                   |
| AC233280.1   | 0.898986237                            | N                                            | 0                                      | N                                   |
| NVL          | 0.898992506                            | N                                            | 2                                      | N                                   |
| STK4         | 0.898992506                            | N                                            | 5                                      | N                                   |
| MRPL19       | 0.898993841                            | N                                            | 0                                      | N                                   |
| NLGN2        | 0.898993841                            | N                                            | 2                                      | N                                   |
| RASGRP3      | 0.898993841                            | N                                            | 2                                      | N                                   |
| SRL          | 0.898993841                            | N                                            | 89                                     | N                                   |
| AC005332.7   | 0.899009996                            | N                                            | 0                                      | N                                   |
| AC022400.3   | 0.899009996                            | N                                            | 0                                      | N                                   |
| AL035587.1   | 0.899009996                            | N                                            | 0                                      | N                                   |
| AL355472.1   | 0.899009996                            | N                                            | 0                                      | N                                   |
| API5         | 0.899009996                            | N                                            | 2                                      | N                                   |
| NOS1AP       | 0.899009996                            | N                                            | 8                                      | N                                   |
| PEX16        | 0.899009996                            | N                                            | 1                                      | N                                   |

| Gene symbols | FDR (differential expression analysis) | Differentially expressed gene? Y, Yes; N, No | Number of insulin related publications | Insulin related gene? Y, Yes; N, No |
|--------------|----------------------------------------|----------------------------------------------|----------------------------------------|-------------------------------------|
| PPP1CB       | 0.899009996                            | N                                            | 5                                      | N                                   |
| RN7SKP40     | 0.899009996                            | N                                            | 0                                      | N                                   |
| SDCBP2-AS1   | 0.899009996                            | N                                            | 0                                      | N                                   |
| TNFAIP3      | 0.899009996                            | N                                            | 25                                     | N                                   |
| TSPAN4       | 0.899009996                            | N                                            | 0                                      | N                                   |
| HSPA9P1      | 0.899023247                            | N                                            | 0                                      | N                                   |
| LIX1L        | 0.899023247                            | N                                            | 0                                      | N                                   |
| AC005539.1   | 0.899101943                            | N                                            | 0                                      | N                                   |
| ODF3B        | 0.899101943                            | N                                            | 1                                      | N                                   |
| AC098484.2   | 0.899216384                            | N                                            | 0                                      | N                                   |
| AC099791.1   | 0.899216384                            | N                                            | 0                                      | N                                   |
| RDH10        | 0.899216384                            | N                                            | 5                                      | N                                   |
| AC010547.5   | 0.899222482                            | N                                            | 0                                      | N                                   |
| AL117692.1   | 0.899222482                            | N                                            | 0                                      | N                                   |
| CDHR4        | 0.899222482                            | N                                            | 0                                      | N                                   |
| MCM3AP       | 0.899222482                            | N                                            | 0                                      | N                                   |
| SOX1         | 0.899222482                            | N                                            | 6                                      | N                                   |
| AC005332.1   | 0.899252675                            | N                                            | 0                                      | N                                   |
| AC009948.4   | 0.899275691                            | N                                            | 0                                      | N                                   |
| SRI          | 0.899275691                            | N                                            | 303                                    | Y                                   |
| TM4SF4       | 0.899275691                            | N                                            | 2                                      | N                                   |
| TMEM92-AS1   | 0.899275691                            | N                                            | 0                                      | N                                   |
| EIF3K        | 0.899299922                            | N                                            | 0                                      | N                                   |
| FOXG1        | 0.899299922                            | N                                            | 7                                      | N                                   |
| POMGNT1      | 0.899299922                            | N                                            | 0                                      | N                                   |
| RN7SL151P    | 0.899299922                            | N                                            | 0                                      | N                                   |
| TSNAXIP1     | 0.899299922                            | N                                            | 0                                      | N                                   |
| AC004466.2   | 0.899311789                            | N                                            | 0                                      | N                                   |
| LINC00884    | 0.899311789                            | N                                            | 0                                      | N                                   |
| ADAM22       | 0.899358601                            | N                                            | 2                                      | N                                   |
| FAM135B      | 0.899358601                            | N                                            | 0                                      | N                                   |
| FFAR4        | 0.899358601                            | N                                            | 95                                     | N                                   |
| PSMA6P1      | 0.899358601                            | N                                            | 0                                      | N                                   |
| TTC34        | 0.899358601                            | N                                            | 0                                      | N                                   |
| IGHG1        | 0.899380047                            | N                                            | 1                                      | N                                   |
| RAF1         | 0.899380047                            | N                                            | 39                                     | N                                   |
| AC022494.1   | 0.899409498                            | N                                            | 0                                      | N                                   |
| AKAP12       | 0.899409498                            | N                                            | 2                                      | N                                   |
| AL049636.1   | 0.899409498                            | N                                            | 0                                      | N                                   |
| AL136295.2   | 0.899409498                            | N                                            | 0                                      | N                                   |
| AL354696.2   | 0.899409498                            | N                                            | 0                                      | N                                   |
| FZD5         | 0.899409498                            | N                                            | 2                                      | N                                   |
| MAMLD1       | 0.899409498                            | N                                            | 1                                      | N                                   |
| MOB3A        | 0.899409498                            | N                                            | 0                                      | N                                   |
| MOG          | 0.899409498                            | N                                            | 23                                     | N                                   |
| POLR3GP1     | 0.899409498                            | N                                            | 0                                      | N                                   |
| RIPOR1       | 0.899409498                            | N                                            | 0                                      | N                                   |
| TMEFF1       | 0.899409498                            | N                                            | 1                                      | N                                   |
| FRMD4A       | 0.899495961                            | N                                            | 0                                      | N                                   |
| AC092143.4   | 0.899686139                            | N                                            | 0                                      | N                                   |
| AL731571.1   | 0.899686139                            | N                                            | 0                                      | N                                   |
| FAM120B      | 0.899686139                            | N                                            | 0                                      | N                                   |
| AC110373.1   | 0.899839712                            | N                                            | 0                                      | N                                   |
| NRBP1        | 0.899848763                            | N                                            | 0                                      | N                                   |
| NSUN6        | 0.899848763                            | N                                            | 0                                      | N                                   |
| CRNKL1       | 0.899850708                            | N                                            | 0                                      | N                                   |
| PNPLA2       | 0.899850708                            | N                                            | 105                                    | Y                                   |
| COL4A1       | 0.899881117                            | N                                            | 6                                      | N                                   |
| ZNF215       | 0.900073021                            | N                                            | 2                                      | N                                   |
| AC135048.4   | 0.90010884                             | N                                            | 0                                      | N                                   |
| MAVS         | 0.90010884                             | N                                            | 1                                      | N                                   |
| C15orf54     | 0.900156779                            | N                                            | 0                                      | N                                   |
| FAM210CP     | 0.90029252                             | N                                            | 0                                      | N                                   |
| LINC00683    | 0.90029252                             | N                                            | 0                                      | N                                   |
| ZNF813       | 0.90029252                             | N                                            | 0                                      | N                                   |
| AC011511.1   | 0.90031481                             | N                                            | 0                                      | N                                   |

| Gene symbols  | FDR (differential expression analysis) | Differentially expressed gene? Y, Yes; N, No | Number of insulin related publications | Insulin related gene? Y, Yes; N, No |
|---------------|----------------------------------------|----------------------------------------------|----------------------------------------|-------------------------------------|
| NBPF11        | 0.900364081                            | N                                            | 0                                      | N                                   |
| ALKBH7        | 0.900364779                            | N                                            | 0                                      | N                                   |
| AP002990.1    | 0.900364779                            | N                                            | 0                                      | N                                   |
| B3GAT2        | 0.900364779                            | N                                            | 0                                      | N                                   |
| CCDC184       | 0.900364779                            | N                                            | 0                                      | N                                   |
| CHCHD2        | 0.900364779                            | N                                            | 1                                      | N                                   |
| CPA4          | 0.900364779                            | N                                            | 2                                      | N                                   |
| NSRP1P1       | 0.900364779                            | N                                            | 0                                      | N                                   |
| VPS16         | 0.900364779                            | N                                            | 0                                      | N                                   |
| AL671277.2    | 0.900387376                            | N                                            | 0                                      | N                                   |
| AL158066.1    | 0.90042491                             | N                                            | 0                                      | N                                   |
| RAP1GAP       | 0.900538538                            | N                                            | 2                                      | N                                   |
| AL590666.3    | 0.900562752                            | N                                            | 0                                      | N                                   |
| INPP5J        | 0.900562752                            | N                                            | 0                                      | N                                   |
| ARRDC1        | 0.900677566                            | N                                            | 0                                      | N                                   |
| HCG25         | 0.900677566                            | N                                            | 0                                      | N                                   |
| KDELC1        | 0.900677566                            | N                                            | 0                                      | N                                   |
| MUT           | 0.900677566                            | N                                            | 55                                     | N                                   |
| CASC2         | 0.900729001                            | N                                            | 0                                      | N                                   |
| NRG4          | 0.900729001                            | N                                            | 18                                     | N                                   |
| RAPGEF1       | 0.900735651                            | N                                            | 3                                      | N                                   |
| AL358472.1    | 0.901092945                            | N                                            | 0                                      | N                                   |
| CSNK2A3       | 0.901092945                            | N                                            | 0                                      | N                                   |
| ATP8B1        | 0.901178874                            | N                                            | 5                                      | N                                   |
| RIMKLBP2      | 0.901186852                            | N                                            | 0                                      | N                                   |
| AC007541.1    | 0.901349207                            | N                                            | 0                                      | N                                   |
| AL591848.3    | 0.901349207                            | N                                            | 0                                      | N                                   |
| FAM177A1      | 0.901349207                            | N                                            | 0                                      | N                                   |
| GIN1          | 0.901349207                            | N                                            | 0                                      | N                                   |
| MBD6          | 0.901349207                            | N                                            | 0                                      | N                                   |
| THSD7A        | 0.901364341                            | N                                            | 1                                      | N                                   |
| CLOCK         | 0.901475977                            | N                                            | 529                                    | Y                                   |
| OCLN          | 0.901475977                            | N                                            | 26                                     | N                                   |
| GRTP1         | 0.901529257                            | N                                            | 0                                      | N                                   |
| EIF2S1        | 0.901590558                            | N                                            | 1                                      | N                                   |
| FAM47E-STBD1  | 0.901590558                            | N                                            | 0                                      | N                                   |
| RN7SKP16      | 0.901590558                            | N                                            | 0                                      | N                                   |
| IQCG          | 0.901626696                            | N                                            | 0                                      | N                                   |
| AC007390.2    | 0.901785209                            | N                                            | 0                                      | N                                   |
| CNDP2         | 0.901785209                            | N                                            | 1                                      | N                                   |
| DNAJA2        | 0.901785209                            | N                                            | 0                                      | N                                   |
| HOXA9         | 0.901785209                            | N                                            | 12                                     | N                                   |
| CEP350        | 0.901888076                            | N                                            | 0                                      | N                                   |
| AL353751.1    | 0.902030531                            | N                                            | 0                                      | N                                   |
| FAM72C        | 0.902030531                            | N                                            | 0                                      | N                                   |
| KLHDC7A       | 0.902030531                            | N                                            | 0                                      | N                                   |
| PCDH19        | 0.902030531                            | N                                            | 0                                      | N                                   |
| AC005154.3    | 0.902057732                            | N                                            | 0                                      | N                                   |
| AC005899.1    | 0.902057732                            | N                                            | 0                                      | N                                   |
| AC007066.1    | 0.902057732                            | N                                            | 0                                      | N                                   |
| AC007743.1    | 0.902057732                            | N                                            | 0                                      | N                                   |
| ACTG1P3       | 0.902057732                            | N                                            | 0                                      | N                                   |
| AL133517.1    | 0.902057732                            | N                                            | 0                                      | N                                   |
| BRAT1         | 0.902057732                            | N                                            | 0                                      | N                                   |
| CRTC2         | 0.902057732                            | N                                            | 94                                     | N                                   |
| CTD-2576F9.1  | 0.902057732                            | N                                            | 0                                      | N                                   |
| KPNA4         | 0.902057732                            | N                                            | 0                                      | N                                   |
| MHENCN        | 0.902057732                            | N                                            | 0                                      | N                                   |
| RP11-508N12.4 | 0.902057732                            | N                                            | 0                                      | N                                   |
| RPL4          | 0.902057732                            | N                                            | 0                                      | N                                   |
| SLC25A39P1    | 0.902057732                            | N                                            | 0                                      | N                                   |
| TRADD         | 0.902057732                            | N                                            | 5                                      | N                                   |
| FBXO40        | 0.902062892                            | N                                            | 3                                      | N                                   |
| METTL12       | 0.902062892                            | N                                            | 0                                      | N                                   |
| MFN1          | 0.902062892                            | N                                            | 31                                     | N                                   |
| RNF19A        | 0.902062892                            | N                                            | 1                                      | N                                   |

| Gene symbols | FDR (differential expression analysis) | Differentially expressed gene? Y, Yes; N, No | Number of insulin related publications | Insulin related gene? Y, Yes; N, No |
|--------------|----------------------------------------|----------------------------------------------|----------------------------------------|-------------------------------------|
| ZNF783       | 0.902062892                            | N                                            | 0                                      | N                                   |
| AP000936.2   | 0.902080063                            | N                                            | 0                                      | N                                   |
| SREK1        | 0.902261499                            | N                                            | 0                                      | N                                   |
| AC009951.1   | 0.902329198                            | N                                            | 0                                      | N                                   |
| AC025574.1   | 0.902329198                            | N                                            | 0                                      | N                                   |
| AC087239.1   | 0.902329198                            | N                                            | 0                                      | N                                   |
| AC092612.1   | 0.902329198                            | N                                            | 0                                      | N                                   |
| AL359095.1   | 0.902329198                            | N                                            | 0                                      | N                                   |
| FO680682.1   | 0.902329198                            | N                                            | 0                                      | N                                   |
| HSPA2        | 0.902329198                            | N                                            | 2                                      | N                                   |
| METTL14      | 0.902329198                            | N                                            | 4                                      | N                                   |
| NIPA2        | 0.902329198                            | N                                            | 0                                      | N                                   |
| AC105760.2   | 0.902371414                            | N                                            | 0                                      | N                                   |
| AC013714.1   | 0.902526264                            | N                                            | 0                                      | N                                   |
| AC020978.8   | 0.902526264                            | N                                            | 0                                      | N                                   |
| AC026877.1   | 0.902526264                            | N                                            | 0                                      | N                                   |
| AC090502.2   | 0.902526264                            | N                                            | 0                                      | N                                   |
| AC092139.4   | 0.902526264                            | N                                            | 0                                      | N                                   |
| AC107308.1   | 0.902526264                            | N                                            | 0                                      | N                                   |
| AL354892.3   | 0.902526264                            | N                                            | 0                                      | N                                   |
| AL355916.1   | 0.902526264                            | N                                            | 0                                      | N                                   |
| AL627422.1   | 0.902526264                            | N                                            | 0                                      | N                                   |
| ANKDD1B      | 0.902526264                            | N                                            | 0                                      | N                                   |
| AP003080.1   | 0.902526264                            | N                                            | 0                                      | N                                   |
| BEND7        | 0.902526264                            | N                                            | 0                                      | N                                   |
| CABIN1       | 0.902526264                            | N                                            | 0                                      | N                                   |
| FICD         | 0.902526264                            | N                                            | 1                                      | N                                   |
| GDF10        | 0.902526264                            | N                                            | 3                                      | N                                   |
| MGAT4B       | 0.902526264                            | N                                            | 0                                      | N                                   |
| MMADHC       | 0.902526264                            | N                                            | 1                                      | N                                   |
| MTHFR        | 0.902526264                            | N                                            | 94                                     | N                                   |
| NUS1         | 0.902526264                            | N                                            | 0                                      | N                                   |
| OTUD6A       | 0.902526264                            | N                                            | 0                                      | N                                   |
| PRKD3        | 0.902526264                            | N                                            | 0                                      | N                                   |
| RPL3P3       | 0.902526264                            | N                                            | 0                                      | N                                   |
| TMEM147-AS1  | 0.902526264                            | N                                            | 0                                      | N                                   |
| ZNF649       | 0.902526264                            | N                                            | 0                                      | N                                   |
| NGFR         | 0.902720456                            | N                                            | 16                                     | N                                   |
| PPWD1        | 0.902720456                            | N                                            | 0                                      | N                                   |
| EXPH5        | 0.902814718                            | N                                            | 0                                      | N                                   |
| AC078991.1   | 0.903144986                            | N                                            | 0                                      | N                                   |
| MED31        | 0.903168807                            | N                                            | 0                                      | N                                   |
| RNF214       | 0.903225965                            | N                                            | 0                                      | N                                   |
| THAP12P3     | 0.903225965                            | N                                            | 0                                      | N                                   |
| AC233723.1   | 0.903250074                            | N                                            | 0                                      | N                                   |
| VPS37D       | 0.903267712                            | N                                            | 0                                      | N                                   |
| AC234782.2   | 0.903272352                            | N                                            | 0                                      | N                                   |
| ANKRD29      | 0.903272352                            | N                                            | 0                                      | N                                   |
| RORA-AS1     | 0.903321221                            | N                                            | 0                                      | N                                   |
| AC135983.2   | 0.903328417                            | N                                            | 0                                      | N                                   |
| AL356299.2   | 0.903328417                            | N                                            | 0                                      | N                                   |
| ATP6V1G3     | 0.903328417                            | N                                            | 0                                      | N                                   |
| HSPD1P1      | 0.903328417                            | N                                            | 0                                      | N                                   |
| LINC01586    | 0.903328417                            | N                                            | 0                                      | N                                   |
| PLAC8        | 0.903328417                            | N                                            | 2                                      | N                                   |
| RND1         | 0.903328417                            | N                                            | 1                                      | N                                   |
| RNF126P1     | 0.903328417                            | N                                            | 0                                      | N                                   |
| SLC15A3      | 0.903328417                            | N                                            | 0                                      | N                                   |
| ADH5P3       | 0.903471218                            | N                                            | 0                                      | N                                   |
| AL133338.1   | 0.903471218                            | N                                            | 0                                      | N                                   |
| AL442125.2   | 0.903471218                            | N                                            | 0                                      | N                                   |
| AP001453.1   | 0.903471218                            | N                                            | 0                                      | N                                   |
| AP002957.1   | 0.903471218                            | N                                            | 0                                      | N                                   |
| CEP290       | 0.903471218                            | N                                            | 0                                      | N                                   |
| EPHA6        | 0.903471218                            | N                                            | 1                                      | N                                   |
| FER1L6       | 0.903471218                            | N                                            | 0                                      | N                                   |

| Gene symbols  | FDR (differential expression analysis) | Differentially expressed gene? Y, Yes; N, No | Number of insulin related publications | Insulin related gene? Y, Yes; N, No |
|---------------|----------------------------------------|----------------------------------------------|----------------------------------------|-------------------------------------|
| KCNJ16        | 0.903471218                            | N                                            | 1                                      | N                                   |
| LINC01778     | 0.903471218                            | N                                            | 0                                      | N                                   |
| MICAL3        | 0.903471218                            | N                                            | 1                                      | N                                   |
| VAT1L         | 0.903471218                            | N                                            | 0                                      | N                                   |
| ZNF639        | 0.903471218                            | N                                            | 0                                      | N                                   |
| AL138831.3    | 0.903489124                            | N                                            | 0                                      | N                                   |
| GPRC5A        | 0.90351825                             | N                                            | 0                                      | N                                   |
| AC012074.1    | 0.903608719                            | N                                            | 0                                      | N                                   |
| MLF2          | 0.903608719                            | N                                            | 0                                      | N                                   |
| POMT2         | 0.903608719                            | N                                            | 0                                      | N                                   |
| RHEBP1        | 0.903608719                            | N                                            | 0                                      | N                                   |
| XPO5          | 0.903608719                            | N                                            | 0                                      | N                                   |
| AL022322.2    | 0.903704095                            | N                                            | 0                                      | N                                   |
| C14orf105     | 0.903704095                            | N                                            | 0                                      | N                                   |
| LEKR1         | 0.903704095                            | N                                            | 2                                      | N                                   |
| PRKXP1        | 0.903704095                            | N                                            | 0                                      | N                                   |
| CYTH4         | 0.903718533                            | N                                            | 0                                      | N                                   |
| PAPD7         | 0.90373609                             | N                                            | 0                                      | N                                   |
| AL158050.1    | 0.903762706                            | N                                            | 0                                      | N                                   |
| CWC15         | 0.903762706                            | N                                            | 0                                      | N                                   |
| AC092658.1    | 0.903779281                            | N                                            | 0                                      | N                                   |
| AC114801.2    | 0.903779281                            | N                                            | 0                                      | N                                   |
| C15orf40      | 0.903779281                            | N                                            | 0                                      | N                                   |
| AC020907.2    | 0.90386122                             | N                                            | 0                                      | N                                   |
| CMTR1         | 0.90386122                             | N                                            | 0                                      | N                                   |
| DGKI          | 0.90386122                             | N                                            | 0                                      | N                                   |
| LRAT          | 0.90386122                             | N                                            | 3                                      | N                                   |
| PRR12         | 0.90386122                             | N                                            | 0                                      | N                                   |
| RBM46         | 0.90386122                             | N                                            | 0                                      | N                                   |
| SGMS1         | 0.90386122                             | N                                            | 5                                      | N                                   |
| MCL1          | 0.903885234                            | N                                            | 20                                     | N                                   |
| AC015920.1    | 0.903907526                            | N                                            | 0                                      | N                                   |
| PRDX1         | 0.904008663                            | N                                            | 12                                     | N                                   |
| AC016747.3    | 0.904120199                            | N                                            | 0                                      | N                                   |
| SEMA6B        | 0.904120199                            | N                                            | 0                                      | N                                   |
| CSPG4P10      | 0.904235601                            | N                                            | 0                                      | N                                   |
| P2RX5-TAX1BP3 | 0.904235601                            | N                                            | 0                                      | N                                   |
| TMEM132A      | 0.904235601                            | N                                            | 0                                      | N                                   |
| PLA2G4F       | 0.904274398                            | N                                            | 0                                      | N                                   |
| ANKRD44       | 0.90427582                             | N                                            | 0                                      | N                                   |
| SEPT7P2       | 0.90427582                             | N                                            | 0                                      | N                                   |
| AL450326.1    | 0.904360523                            | N                                            | 0                                      | N                                   |
| AC048341.3    | 0.904388919                            | N                                            | 0                                      | N                                   |
| ATP1B2        | 0.904388919                            | N                                            | 1                                      | N                                   |
| BOLA3P2       | 0.904388919                            | N                                            | 0                                      | N                                   |
| TIMM17A       | 0.904388919                            | N                                            | 0                                      | N                                   |
| AC114928.1    | 0.904458558                            | N                                            | 0                                      | N                                   |
| SEMA6A-AS1    | 0.904458558                            | N                                            | 0                                      | N                                   |
| PPARD         | 0.904475737                            | N                                            | 51                                     | N                                   |
| AC073082.1    | 0.904583073                            | N                                            | 0                                      | N                                   |
| GNL3LP1       | 0.904583073                            | N                                            | 0                                      | N                                   |
| RBM48         | 0.904583073                            | N                                            | 0                                      | N                                   |
| RBMS2P1       | 0.904583073                            | N                                            | 0                                      | N                                   |
| TPTE          | 0.904583073                            | N                                            | 2                                      | N                                   |
| LTBP1         | 0.90468122                             | N                                            | 3                                      | N                                   |
| AL391825.1    | 0.904817976                            | N                                            | 0                                      | N                                   |
| AC025678.3    | 0.905051436                            | N                                            | 0                                      | N                                   |
| LINC00574     | 0.90512223                             | N                                            | 0                                      | N                                   |
| CPT1B         | 0.90512545                             | N                                            | 73                                     | N                                   |
| EEF1A1P25     | 0.90512545                             | N                                            | 0                                      | N                                   |
| FGF12         | 0.90512545                             | N                                            | 1                                      | N                                   |
| KLC2          | 0.90512545                             | N                                            | 1                                      | N                                   |
| RPS6          | 0.90512545                             | N                                            | 90                                     | N                                   |
| ST6GALNAC4    | 0.90512545                             | N                                            | 0                                      | N                                   |
| KCNG2         | 0.905476589                            | N                                            | 0                                      | N                                   |
| SDHCP3        | 0.905476589                            | N                                            | 0                                      | N                                   |

| Gene symbols | FDR (differential expression analysis) | Differentially expressed gene? Y, Yes; N, No | Number of insulin related publications | Insulin related gene? Y, Yes; N, No |
|--------------|----------------------------------------|----------------------------------------------|----------------------------------------|-------------------------------------|
| CNOT6LP1     | 0.905505113                            | N                                            | 0                                      | N                                   |
| AC025198.1   | 0.905538584                            | N                                            | 0                                      | N                                   |
| AC091812.2   | 0.905538584                            | N                                            | 0                                      | N                                   |
| AC234783.1   | 0.905538584                            | N                                            | 0                                      | N                                   |
| AL049840.4   | 0.905538584                            | N                                            | 0                                      | N                                   |
| AL356488.2   | 0.905538584                            | N                                            | 0                                      | N                                   |
| EIF2AK1      | 0.905538584                            | N                                            | 5                                      | N                                   |
| KIF13B       | 0.905538584                            | N                                            | 0                                      | N                                   |
| POU3F3       | 0.905538584                            | N                                            | 0                                      | N                                   |
| UBOX5        | 0.905538584                            | N                                            | 0                                      | N                                   |
| VOPP1        | 0.905538584                            | N                                            | 0                                      | N                                   |
| FBXL5        | 0.905607158                            | N                                            | 0                                      | N                                   |
| AC104561.2   | 0.905608992                            | N                                            | 0                                      | N                                   |
| AGAP1-IT1    | 0.905608992                            | N                                            | 0                                      | N                                   |
| AMD1P4       | 0.905608992                            | N                                            | 0                                      | N                                   |
| AP003716.1   | 0.905608992                            | N                                            | 0                                      | N                                   |
| ZBTB24       | 0.905608992                            | N                                            | 0                                      | N                                   |
| KRT18P4      | 0.905620335                            | N                                            | 0                                      | N                                   |
| PRSS27       | 0.905763636                            | N                                            | 0                                      | N                                   |
| RN7SKP80     | 0.905763636                            | N                                            | 0                                      | N                                   |
| RP3-341O5.3  | 0.905763636                            | N                                            | 0                                      | N                                   |
| SWSAP1       | 0.905763636                            | N                                            | 0                                      | N                                   |
| AC015969.1   | 0.905841961                            | N                                            | 0                                      | N                                   |
| PPP3CA       | 0.906008465                            | N                                            | 5                                      | N                                   |
| LINC00893    | 0.906029863                            | N                                            | 0                                      | N                                   |
| ANP32AP1     | 0.9060429                              | N                                            | 0                                      | N                                   |
| QRSL1P1      | 0.9060429                              | N                                            | 0                                      | N                                   |
| ALDOAP1      | 0.906121135                            | N                                            | 0                                      | N                                   |
| AC025048.6   | 0.906157587                            | N                                            | 0                                      | N                                   |
| DPP3         | 0.906200107                            | N                                            | 0                                      | N                                   |
| SKI          | 0.906273036                            | N                                            | 39                                     | N                                   |
| AC018754.1   | 0.906508739                            | N                                            | 0                                      | N                                   |
| RPRML        | 0.906508739                            | N                                            | 0                                      | N                                   |
| MLH3         | 0.906589777                            | N                                            | 1                                      | N                                   |
| ABHD8        | 0.90703389                             | N                                            | 0                                      | N                                   |
| DLGAP1       | 0.90703389                             | N                                            | 0                                      | N                                   |
| LINC02453    | 0.90703389                             | N                                            | 0                                      | N                                   |
| AGKP1        | 0.907063633                            | N                                            | 0                                      | N                                   |
| ASAH2B       | 0.907063633                            | N                                            | 0                                      | N                                   |
| RALGPS2      | 0.907063633                            | N                                            | 1                                      | N                                   |
| MT1XP1       | 0.907120234                            | N                                            | 0                                      | N                                   |
| AC104619.4   | 0.907133932                            | N                                            | 0                                      | N                                   |
| AC111000.5   | 0.907133932                            | N                                            | 0                                      | N                                   |
| ALPK3        | 0.907133932                            | N                                            | 0                                      | N                                   |
| GLRXP2       | 0.907133932                            | N                                            | 0                                      | N                                   |
| LRRC57       | 0.907133932                            | N                                            | 0                                      | N                                   |
| MAFTRR       | 0.907133932                            | N                                            | 0                                      | N                                   |
| NELL2        | 0.907133932                            | N                                            | 1                                      | N                                   |
| PRKAR1AP1    | 0.907133932                            | N                                            | 0                                      | N                                   |
| RIOK1        | 0.907133932                            | N                                            | 0                                      | N                                   |
| RN7SL644P    | 0.907133932                            | N                                            | 0                                      | N                                   |
| RPLP0P2      | 0.907133932                            | N                                            | 0                                      | N                                   |
| TMED9        | 0.907133932                            | N                                            | 1                                      | N                                   |
| UBA3         | 0.907133932                            | N                                            | 1                                      | N                                   |
| USP45        | 0.907133932                            | N                                            | 2                                      | N                                   |
| VILL         | 0.907133932                            | N                                            | 1                                      | N                                   |
| ZRSR2        | 0.907133932                            | N                                            | 0                                      | N                                   |
| AC010618.1   | 0.907182019                            | N                                            | 0                                      | N                                   |
| AC053513.1   | 0.907182019                            | N                                            | 0                                      | N                                   |
| AC124276.1   | 0.907182019                            | N                                            | 0                                      | N                                   |
| AC138393.1   | 0.907182019                            | N                                            | 0                                      | N                                   |
| AL358781.1   | 0.907182019                            | N                                            | 0                                      | N                                   |
| EIF2S2       | 0.907182019                            | N                                            | 1                                      | N                                   |
| FRMPD4       | 0.907182019                            | N                                            | 0                                      | N                                   |
| GABRG3       | 0.907182019                            | N                                            | 0                                      | N                                   |
| GNG11        | 0.907182019                            | N                                            | 1                                      | N                                   |



| Gene symbols | FDR (differential expression analysis) | Differentially expressed gene? Y, Yes; N, No | Number of insulin related publications | Insulin related gene? Y, Yes; N, No |
|--------------|----------------------------------------|----------------------------------------------|----------------------------------------|-------------------------------------|
| HDAC2        | 0.907182019                            | N                                            | 23                                     | N                                   |
| MAP4K4       | 0.907182019                            | N                                            | 21                                     | N                                   |
| NXPE1        | 0.907182019                            | N                                            | 1                                      | N                                   |
| RPL37A       | 0.907182019                            | N                                            | 0                                      | N                                   |
| SNHG8        | 0.907182019                            | N                                            | 0                                      | N                                   |
| TAS2R31      | 0.907182019                            | N                                            | 0                                      | N                                   |
| ZNRD1ASP     | 0.907182019                            | N                                            | 0                                      | N                                   |
| IFIT1P1      | 0.907222428                            | N                                            | 0                                      | N                                   |
| NR1H3        | 0.907235353                            | N                                            | 106                                    | Y                                   |
| AC079949.2   | 0.907236681                            | N                                            | 0                                      | N                                   |
| C2orf82      | 0.907236681                            | N                                            | 0                                      | N                                   |
| ZNF121       | 0.907236681                            | N                                            | 0                                      | N                                   |
| ABHD1        | 0.907277182                            | N                                            | 0                                      | N                                   |
| AC011447.3   | 0.907277182                            | N                                            | 0                                      | N                                   |
| ATP11C       | 0.907277182                            | N                                            | 0                                      | N                                   |
| ATP1B4       | 0.907277182                            | N                                            | 0                                      | N                                   |
| FAM92B       | 0.907277182                            | N                                            | 0                                      | N                                   |
| LRCH2        | 0.907277182                            | N                                            | 0                                      | N                                   |
| OR5P1P       | 0.907277182                            | N                                            | 0                                      | N                                   |
| PRR23C       | 0.907277182                            | N                                            | 0                                      | N                                   |
| SEPT7P6      | 0.907277182                            | N                                            | 0                                      | N                                   |
| SLU7         | 0.907277182                            | N                                            | 0                                      | N                                   |
| TAF4B        | 0.907277182                            | N                                            | 1                                      | N                                   |
| AC020893.2   | 0.907290728                            | N                                            | 0                                      | N                                   |
| AC034114.1   | 0.907290728                            | N                                            | 0                                      | N                                   |
| AC083964.2   | 0.907290728                            | N                                            | 0                                      | N                                   |
| AC124891.1   | 0.907290728                            | N                                            | 0                                      | N                                   |
| AMZ2         | 0.907290728                            | N                                            | 0                                      | N                                   |
| BTBD10P2     | 0.907290728                            | N                                            | 0                                      | N                                   |
| COPS8        | 0.907290728                            | N                                            | 0                                      | N                                   |
| DET1         | 0.907290728                            | N                                            | 0                                      | N                                   |
| DOCK9        | 0.907290728                            | N                                            | 1                                      | N                                   |
| GADD45A      | 0.907290728                            | N                                            | 18                                     | N                                   |
| NUDT4        | 0.907290728                            | N                                            | 0                                      | N                                   |
| PGS1         | 0.907290728                            | N                                            | 1                                      | N                                   |
| STK4-AS1     | 0.907290728                            | N                                            | 0                                      | N                                   |
| TCEA1P2      | 0.907290728                            | N                                            | 0                                      | N                                   |
| AL161756.1   | 0.907349136                            | N                                            | 0                                      | N                                   |
| AL606490.5   | 0.907349136                            | N                                            | 0                                      | N                                   |
| BLOC1S3      | 0.907485701                            | N                                            | 0                                      | N                                   |
| PLEKHG2      | 0.907485701                            | N                                            | 0                                      | N                                   |
| POLR3H       | 0.907485701                            | N                                            | 0                                      | N                                   |
| AC009336.3   | 0.907508158                            | N                                            | 0                                      | N                                   |
| AC083899.2   | 0.907508158                            | N                                            | 0                                      | N                                   |
| AC145350.2   | 0.907508158                            | N                                            | 0                                      | N                                   |
| CFAP74       | 0.907508158                            | N                                            | 0                                      | N                                   |
| LYPLA2P1     | 0.907508158                            | N                                            | 0                                      | N                                   |
| MEIS1        | 0.907508158                            | N                                            | 3                                      | N                                   |
| PDCL3P4      | 0.907530225                            | N                                            | 0                                      | N                                   |
| RPL24        | 0.907530225                            | N                                            | 0                                      | N                                   |
| TADA2B       | 0.907588531                            | N                                            | 0                                      | N                                   |
| WASHC1       | 0.907588531                            | N                                            | 0                                      | N                                   |
| SEPT10       | 0.907647406                            | N                                            | 0                                      | N                                   |
| AC008163.1   | 0.907647406                            | N                                            | 0                                      | N                                   |
| AC114755.1   | 0.907647406                            | N                                            | 0                                      | N                                   |
| AC116651.1   | 0.907647406                            | N                                            | 0                                      | N                                   |
| AL158152.1   | 0.907647406                            | N                                            | 0                                      | N                                   |
| AP003969.2   | 0.907647406                            | N                                            | 0                                      | N                                   |
| C8G          | 0.907647406                            | N                                            | 0                                      | N                                   |
| KCTD4        | 0.907647406                            | N                                            | 0                                      | N                                   |
| LMO4         | 0.907647406                            | N                                            | 5                                      | N                                   |
| RAP1A        | 0.907647406                            | N                                            | 5                                      | N                                   |
| RING1        | 0.907647406                            | N                                            | 2                                      | N                                   |
| RPL7         | 0.907647406                            | N                                            | 1                                      | N                                   |
| OR7E38P      | 0.907681635                            | N                                            | 0                                      | N                                   |
| AL137058.2   | 0.907719161                            | N                                            | 0                                      | N                                   |

| Gene symbols       | FDR (differential expression analysis) | Differentially expressed gene? Y, Yes; N, No | Number of insulin related publications | Insulin related gene? Y, Yes; N, No |
|--------------------|----------------------------------------|----------------------------------------------|----------------------------------------|-------------------------------------|
| AL390726.3         | 0.907719161                            | N                                            | 0                                      | N                                   |
| NIFKP3             | 0.907719161                            | N                                            | 0                                      | N                                   |
| SPTBN5             | 0.907719161                            | N                                            | 0                                      | N                                   |
| SOX21-AS1          | 0.907797518                            | N                                            | 0                                      | N                                   |
| AC009962.1         | 0.90784297                             | N                                            | 0                                      | N                                   |
| SFXN4              | 0.90784297                             | N                                            | 0                                      | N                                   |
| AP000526.1         | 0.907855214                            | N                                            | 0                                      | N                                   |
| BHMT2              | 0.907957213                            | N                                            | 1                                      | N                                   |
| CNOT3              | 0.907993048                            | N                                            | 3                                      | N                                   |
| INTS1              | 0.908033145                            | N                                            | 0                                      | N                                   |
| KRT8P50            | 0.908033145                            | N                                            | 0                                      | N                                   |
| RGMB-AS1           | 0.908033145                            | N                                            | 1                                      | N                                   |
| RHBDD3             | 0.908033145                            | N                                            | 0                                      | N                                   |
| AIMP1P2            | 0.908101237                            | N                                            | 0                                      | N                                   |
| ADAMTS9-AS1        | 0.908291406                            | N                                            | 0                                      | N                                   |
| CSNK1G2P1          | 0.908360825                            | N                                            | 0                                      | N                                   |
| SLC27A3            | 0.908378733                            | N                                            | 3                                      | N                                   |
| CSPG4P11           | 0.90838385                             | N                                            | 0                                      | N                                   |
| ENGASE             | 0.908422361                            | N                                            | 0                                      | N                                   |
| LETM1              | 0.908422361                            | N                                            | 8                                      | N                                   |
| VIPR2              | 0.908422361                            | N                                            | 31                                     | N                                   |
| PLS3-AS1           | 0.908489269                            | N                                            | 0                                      | N                                   |
| AC004492.1         | 0.908541546                            | N                                            | 0                                      | N                                   |
| AC026403.1         | 0.908541546                            | N                                            | 0                                      | N                                   |
| AC079447.1         | 0.908541546                            | N                                            | 0                                      | N                                   |
| AP003068.2         | 0.908541546                            | N                                            | 0                                      | N                                   |
| CPN2               | 0.908541546                            | N                                            | 0                                      | N                                   |
| FAM27E3            | 0.908541546                            | N                                            | 0                                      | N                                   |
| GNL3L              | 0.908541546                            | N                                            | 0                                      | N                                   |
| LRRC28             | 0.908541546                            | N                                            | 0                                      | N                                   |
| PCAT18             | 0.908541546                            | N                                            | 0                                      | N                                   |
| PDCD6              | 0.908541546                            | N                                            | 0                                      | N                                   |
| PDK1               | 0.908541546                            | N                                            | 286                                    | Y                                   |
| PTGER4P2-CDK2AP2P2 | 0.908541546                            | N                                            | 0                                      | N                                   |
| RAD51-AS1          | 0.908541546                            | N                                            | 0                                      | N                                   |
| RASSF7             | 0.908541546                            | N                                            | 0                                      | N                                   |
| SBNO1              | 0.908541546                            | N                                            | 0                                      | N                                   |
| SGTA               | 0.908541546                            | N                                            | 1                                      | N                                   |
| SRD5A3             | 0.908541546                            | N                                            | 0                                      | N                                   |
| TRIM52             | 0.908541546                            | N                                            | 0                                      | N                                   |
| ZDHHC18            | 0.908541546                            | N                                            | 0                                      | N                                   |
| ZIC2               | 0.908541546                            | N                                            | 2                                      | N                                   |
| TRIM37             | 0.908611673                            | N                                            | 3                                      | N                                   |
| LINC01876          | 0.908675229                            | N                                            | 0                                      | N                                   |
| AC084346.2         | 0.908709541                            | N                                            | 0                                      | N                                   |
| AC091170.1         | 0.908709541                            | N                                            | 0                                      | N                                   |
| AL139423.1         | 0.908709541                            | N                                            | 0                                      | N                                   |
| C10orf111          | 0.908709541                            | N                                            | 0                                      | N                                   |
| KIAA1107           | 0.908709541                            | N                                            | 0                                      | N                                   |
| KIAA1755           | 0.908709541                            | N                                            | 0                                      | N                                   |
| LMF2               | 0.908709541                            | N                                            | 0                                      | N                                   |
| ZNF580             | 0.908709541                            | N                                            | 0                                      | N                                   |
| AC003072.1         | 0.908726254                            | N                                            | 0                                      | N                                   |
| TUBB1              | 0.908726254                            | N                                            | 1                                      | N                                   |
| S1PR4              | 0.909045768                            | N                                            | 1                                      | N                                   |
| AC087164.1         | 0.909117334                            | N                                            | 0                                      | N                                   |
| CDYL2              | 0.909117334                            | N                                            | 0                                      | N                                   |
| HTD2               | 0.909117334                            | N                                            | 0                                      | N                                   |
| MIDN               | 0.909117334                            | N                                            | 0                                      | N                                   |
| MPP5               | 0.909117334                            | N                                            | 1                                      | N                                   |
| TMTC3              | 0.909117334                            | N                                            | 0                                      | N                                   |
| TOGARAM2           | 0.909117334                            | N                                            | 0                                      | N                                   |
| uc_338             | 0.909117334                            | N                                            | 0                                      | N                                   |
| ZNF546             | 0.909117334                            | N                                            | 0                                      | N                                   |
| AC018797.3         | 0.909151098                            | N                                            | 0                                      | N                                   |
| AL049830.1         | 0.909151098                            | N                                            | 0                                      | N                                   |

| Gene symbols | FDR (differential expression analysis) | Differentially expressed gene? Y, Yes; N, No | Number of insulin related publications | Insulin related gene? Y, Yes; N, No |
|--------------|----------------------------------------|----------------------------------------------|----------------------------------------|-------------------------------------|
| TOX          | 0.909237923                            | N                                            | 27                                     | N                                   |
| CEACAM1      | 0.909411627                            | N                                            | 53                                     | N                                   |
| DISP3        | 0.909437177                            | N                                            | 0                                      | N                                   |
| AC138356.1   | 0.909681248                            | N                                            | 0                                      | N                                   |
| C1GALTIC1    | 0.909681248                            | N                                            | 0                                      | N                                   |
| KIF5A        | 0.909681248                            | N                                            | 0                                      | N                                   |
| PGAM1P6      | 0.909681248                            | N                                            | 0                                      | N                                   |
| TMEM87A      | 0.909681248                            | N                                            | 0                                      | N                                   |
| TNNC1        | 0.909681248                            | N                                            | 2                                      | N                                   |
| AC022400.6   | 0.909692786                            | N                                            | 0                                      | N                                   |
| AL358176.4   | 0.909692786                            | N                                            | 0                                      | N                                   |
| AL512652.1   | 0.909692786                            | N                                            | 0                                      | N                                   |
| CHTOP        | 0.909692786                            | N                                            | 0                                      | N                                   |
| DUXAP10      | 0.909692786                            | N                                            | 0                                      | N                                   |
| HES2         | 0.909692786                            | N                                            | 1                                      | N                                   |
| JUNB         | 0.909692786                            | N                                            | 44                                     | N                                   |
| Metazoa_SRP  | 0.909692786                            | N                                            | 0                                      | N                                   |
| MTA1         | 0.909692786                            | N                                            | 4                                      | N                                   |
| RNF44        | 0.909692786                            | N                                            | 0                                      | N                                   |
| SLC22A17     | 0.909692786                            | N                                            | 0                                      | N                                   |
| TGFBI        | 0.909692786                            | N                                            | 7                                      | N                                   |
| ZNF324       | 0.909692786                            | N                                            | 0                                      | N                                   |
| ZNF483       | 0.909692786                            | N                                            | 0                                      | N                                   |
| AC005831.1   | 0.909732647                            | N                                            | 0                                      | N                                   |
| MLIP         | 0.909836682                            | N                                            | 0                                      | N                                   |
| FBXL12       | 0.909863597                            | N                                            | 0                                      | N                                   |
| AL512378.1   | 0.909876673                            | N                                            | 0                                      | N                                   |
| AC008395.1   | 0.910020755                            | N                                            | 0                                      | N                                   |
| CLK2P1       | 0.910020755                            | N                                            | 0                                      | N                                   |
| CNTNAP3      | 0.910020755                            | N                                            | 0                                      | N                                   |
| ABHD14A-ACY1 | 0.910045669                            | N                                            | 0                                      | N                                   |
| AL391834.1   | 0.910045669                            | N                                            | 0                                      | N                                   |
| AC004241.4   | 0.910086112                            | N                                            | 0                                      | N                                   |
| AC027307.3   | 0.910086112                            | N                                            | 0                                      | N                                   |
| ELAVL3       | 0.910086112                            | N                                            | 2                                      | N                                   |
| LDOC1        | 0.910086112                            | N                                            | 1                                      | N                                   |
| ZSCAN20      | 0.910128203                            | N                                            | 0                                      | N                                   |
| AP4M1        | 0.910404512                            | N                                            | 0                                      | N                                   |
| CLUAP1       | 0.910404512                            | N                                            | 1                                      | N                                   |
| CNN1         | 0.910404512                            | N                                            | 0                                      | N                                   |
| HYMAI        | 0.910404512                            | N                                            | 9                                      | N                                   |
| IP6K2        | 0.910404512                            | N                                            | 2                                      | N                                   |
| ZFAND6       | 0.910404512                            | N                                            | 2                                      | N                                   |
| AC005537.1   | 0.910409656                            | N                                            | 0                                      | N                                   |
| LSM12P1      | 0.910479638                            | N                                            | 0                                      | N                                   |
| AC145207.9   | 0.910638418                            | N                                            | 0                                      | N                                   |
| AC106779.1   | 0.910786837                            | N                                            | 0                                      | N                                   |
| ANKRD19P     | 0.910786837                            | N                                            | 0                                      | N                                   |
| CORO1B       | 0.910786837                            | N                                            | 0                                      | N                                   |
| KLRG1        | 0.910786837                            | N                                            | 26                                     | N                                   |
| NPL          | 0.910786837                            | N                                            | 36                                     | N                                   |
| RP11-58E21.4 | 0.910786837                            | N                                            | 0                                      | N                                   |
| DLG5-AS1     | 0.910961399                            | N                                            | 0                                      | N                                   |
| DENND2D      | 0.911110223                            | N                                            | 0                                      | N                                   |
| ENTPD8       | 0.911110223                            | N                                            | 0                                      | N                                   |
| AC010401.2   | 0.911190298                            | N                                            | 0                                      | N                                   |
| AC124283.3   | 0.911190298                            | N                                            | 0                                      | N                                   |
| ACTG1        | 0.911190298                            | N                                            | 0                                      | N                                   |
| AF129408.1   | 0.911190298                            | N                                            | 0                                      | N                                   |
| AL022323.4   | 0.911190298                            | N                                            | 0                                      | N                                   |
| AL162595.1   | 0.911190298                            | N                                            | 0                                      | N                                   |
| BRF2         | 0.911190298                            | N                                            | 1                                      | N                                   |
| C6orf132     | 0.911190298                            | N                                            | 0                                      | N                                   |
| MTCH1        | 0.911190298                            | N                                            | 0                                      | N                                   |
| PDE8A        | 0.911190298                            | N                                            | 5                                      | N                                   |
| PSG8-AS1     | 0.911190298                            | N                                            | 0                                      | N                                   |

| Gene symbols | FDR (differential expression analysis) | Differentially expressed gene? Y, Yes; N, No | Number of insulin related publications | Insulin related gene? Y, Yes; N, No |
|--------------|----------------------------------------|----------------------------------------------|----------------------------------------|-------------------------------------|
| RELA         | 0.911190298                            | N                                            | 206                                    | Y                                   |
| RPL14        | 0.911190298                            | N                                            | 0                                      | N                                   |
| RSF1-IT1     | 0.911190298                            | N                                            | 0                                      | N                                   |
| AL049842.1   | 0.911233441                            | N                                            | 0                                      | N                                   |
| SMIM11A      | 0.911280866                            | N                                            | 0                                      | N                                   |
| CGRRF1       | 0.911333527                            | N                                            | 1                                      | N                                   |
| DAPK3        | 0.911355564                            | N                                            | 2                                      | N                                   |
| EMSY         | 0.911373318                            | N                                            | 0                                      | N                                   |
| RN7SL38P     | 0.911373318                            | N                                            | 0                                      | N                                   |
| RPS24        | 0.911432886                            | N                                            | 0                                      | N                                   |
| AC002310.3   | 0.911511443                            | N                                            | 0                                      | N                                   |
| AC005351.1   | 0.911511443                            | N                                            | 0                                      | N                                   |
| AC092490.1   | 0.911511443                            | N                                            | 0                                      | N                                   |
| AL023495.1   | 0.911511443                            | N                                            | 0                                      | N                                   |
| CD47         | 0.911511443                            | N                                            | 23                                     | N                                   |
| CRKL         | 0.911511443                            | N                                            | 11                                     | N                                   |
| GYG1         | 0.911511443                            | N                                            | 3                                      | N                                   |
| INAVA        | 0.911511443                            | N                                            | 0                                      | N                                   |
| INCA1        | 0.911511443                            | N                                            | 0                                      | N                                   |
| INVS         | 0.911511443                            | N                                            | 4                                      | N                                   |
| IZUMO4       | 0.911511443                            | N                                            | 0                                      | N                                   |
| LINC01134    | 0.911511443                            | N                                            | 0                                      | N                                   |
| SP2-AS1      | 0.911511443                            | N                                            | 0                                      | N                                   |
| SRGAP2B      | 0.911511443                            | N                                            | 0                                      | N                                   |
| AC027279.4   | 0.911542677                            | N                                            | 0                                      | N                                   |
| ALDOC        | 0.911542677                            | N                                            | 1                                      | N                                   |
| OLA1P1       | 0.911610917                            | N                                            | 0                                      | N                                   |
| ZCCHC4       | 0.911685436                            | N                                            | 0                                      | N                                   |
| DSC1         | 0.91179346                             | N                                            | 0                                      | N                                   |
| EMILIN1      | 0.91179346                             | N                                            | 0                                      | N                                   |
| LIN7A        | 0.91179346                             | N                                            | 2                                      | N                                   |
| PC           | 0.91179346                             | N                                            | 1000                                   | Y                                   |
| RELL2        | 0.911818483                            | N                                            | 0                                      | N                                   |
| AC010997.3   | 0.911838263                            | N                                            | 0                                      | N                                   |
| AC013549.3   | 0.911838263                            | N                                            | 0                                      | N                                   |
| AC036164.1   | 0.911838263                            | N                                            | 0                                      | N                                   |
| AC067852.4   | 0.911838263                            | N                                            | 0                                      | N                                   |
| AC090079.1   | 0.911838263                            | N                                            | 0                                      | N                                   |
| AC096586.1   | 0.911838263                            | N                                            | 0                                      | N                                   |
| ADAM1B       | 0.911838263                            | N                                            | 0                                      | N                                   |
| AL158825.2   | 0.911838263                            | N                                            | 0                                      | N                                   |
| AP002812.5   | 0.911838263                            | N                                            | 0                                      | N                                   |
| DBH-AS1      | 0.911838263                            | N                                            | 0                                      | N                                   |
| DPY19L4      | 0.911838263                            | N                                            | 0                                      | N                                   |
| IRAK2        | 0.911838263                            | N                                            | 19                                     | N                                   |
| LIMS2        | 0.911838263                            | N                                            | 1                                      | N                                   |
| MAPK6PS3     | 0.911838263                            | N                                            | 0                                      | N                                   |
| SCARNA9      | 0.911838263                            | N                                            | 0                                      | N                                   |
| SUCLG2P2     | 0.911838263                            | N                                            | 0                                      | N                                   |
| SYN1         | 0.911838263                            | N                                            | 4                                      | N                                   |
| TNFRSF4      | 0.911838263                            | N                                            | 6                                      | N                                   |
| ZNF213       | 0.911838263                            | N                                            | 0                                      | N                                   |
| ZNF879       | 0.911838263                            | N                                            | 0                                      | N                                   |
| AC087289.3   | 0.912002322                            | N                                            | 0                                      | N                                   |
| FAM186B      | 0.912002322                            | N                                            | 0                                      | N                                   |
| LIN7C        | 0.912002322                            | N                                            | 1                                      | N                                   |
| NANP         | 0.912002322                            | N                                            | 4                                      | N                                   |
| LAPTM4B      | 0.912006689                            | N                                            | 1                                      | N                                   |
| AL606530.1   | 0.912084228                            | N                                            | 0                                      | N                                   |
| RPS15AP38    | 0.912084228                            | N                                            | 0                                      | N                                   |
| AC102953.2   | 0.912156063                            | N                                            | 0                                      | N                                   |
| CNNM3        | 0.912159477                            | N                                            | 1                                      | N                                   |
| ZNF569       | 0.912159477                            | N                                            | 0                                      | N                                   |
| MAPK7        | 0.912165287                            | N                                            | 3                                      | N                                   |
| AC127496.1   | 0.912311321                            | N                                            | 0                                      | N                                   |
| UBA6         | 0.912314528                            | N                                            | 0                                      | N                                   |

| Gene symbols | FDR (differential expression analysis) | Differentially expressed gene? Y, Yes; N, No | Number of insulin related publications | Insulin related gene? Y, Yes; N, No |
|--------------|----------------------------------------|----------------------------------------------|----------------------------------------|-------------------------------------|
| AC073508.3   | 0.912418395                            | N                                            | 0                                      | N                                   |
| AC087501.5   | 0.912418395                            | N                                            | 0                                      | N                                   |
| COX6CP15     | 0.912418395                            | N                                            | 0                                      | N                                   |
| FAM131C      | 0.912504176                            | N                                            | 0                                      | N                                   |
| PHF21B       | 0.912516799                            | N                                            | 0                                      | N                                   |
| SEMA3B       | 0.912813848                            | N                                            | 1                                      | N                                   |
| TMPRSS12     | 0.912813848                            | N                                            | 0                                      | N                                   |
| AL353803.1   | 0.912835699                            | N                                            | 0                                      | N                                   |
| FUT6         | 0.912835699                            | N                                            | 0                                      | N                                   |
| AL355001.2   | 0.912849694                            | N                                            | 0                                      | N                                   |
| AL662791.2   | 0.912849694                            | N                                            | 0                                      | N                                   |
| LINC00517    | 0.912849694                            | N                                            | 0                                      | N                                   |
| MPPE1        | 0.912849694                            | N                                            | 0                                      | N                                   |
| SLIT3        | 0.912849694                            | N                                            | 3                                      | N                                   |
| TNRC18P1     | 0.912849694                            | N                                            | 0                                      | N                                   |
| KLHL18       | 0.912850296                            | N                                            | 0                                      | N                                   |
| CLUHP6       | 0.912885575                            | N                                            | 0                                      | N                                   |
| INO80        | 0.912903065                            | N                                            | 1                                      | N                                   |
| C12orf73     | 0.912992534                            | N                                            | 0                                      | N                                   |
| DBNDD2       | 0.912992534                            | N                                            | 0                                      | N                                   |
| AC005089.1   | 0.913093307                            | N                                            | 0                                      | N                                   |
| ARL5AP4      | 0.913166232                            | N                                            | 0                                      | N                                   |
| EXOG         | 0.913169821                            | N                                            | 1                                      | N                                   |
| KRT7         | 0.913169821                            | N                                            | 12                                     | N                                   |
| LINC02018    | 0.913169821                            | N                                            | 0                                      | N                                   |
| RGS6         | 0.913169821                            | N                                            | 4                                      | N                                   |
| SLC5A5       | 0.913169821                            | N                                            | 1                                      | N                                   |
| AP000568.1   | 0.913219995                            | N                                            | 0                                      | N                                   |
| FBXW4P1      | 0.913376327                            | N                                            | 0                                      | N                                   |
| LRRC37A7P    | 0.913376327                            | N                                            | 0                                      | N                                   |
| HLA-F        | 0.91339588                             | N                                            | 5                                      | N                                   |
| SLC22A23     | 0.91339588                             | N                                            | 0                                      | N                                   |
| ARF6         | 0.913425641                            | N                                            | 34                                     | N                                   |
| ACSS3        | 0.913431162                            | N                                            | 1                                      | N                                   |
| IGSF3        | 0.913431162                            | N                                            | 0                                      | N                                   |
| RRN3P1       | 0.913439158                            | N                                            | 0                                      | N                                   |
| FOXL2        | 0.913674476                            | N                                            | 10                                     | N                                   |
| AC005224.3   | 0.913794419                            | N                                            | 0                                      | N                                   |
| CRMP1        | 0.913794419                            | N                                            | 2                                      | N                                   |
| AC005082.1   | 0.914057281                            | N                                            | 0                                      | N                                   |
| AF038458.1   | 0.914057281                            | N                                            | 0                                      | N                                   |
| PSMA1        | 0.914143914                            | N                                            | 1                                      | N                                   |
| AC009093.2   | 0.914168995                            | N                                            | 0                                      | N                                   |
| AC078899.1   | 0.914168995                            | N                                            | 0                                      | N                                   |
| AC123912.5   | 0.914168995                            | N                                            | 0                                      | N                                   |
| GIPC1        | 0.914168995                            | N                                            | 12                                     | N                                   |
| PLCG1        | 0.914168995                            | N                                            | 5                                      | N                                   |
| TBCE         | 0.914168995                            | N                                            | 0                                      | N                                   |
| TRAPPC8      | 0.914168995                            | N                                            | 0                                      | N                                   |
| Z95114.4     | 0.914168995                            | N                                            | 0                                      | N                                   |
| ZSCAN12P1    | 0.914168995                            | N                                            | 0                                      | N                                   |
| C11orf45     | 0.914281615                            | N                                            | 0                                      | N                                   |
| CCR7         | 0.914281615                            | N                                            | 32                                     | N                                   |
| DGCR6L       | 0.914281615                            | N                                            | 0                                      | N                                   |
| OAZ3         | 0.914314515                            | N                                            | 0                                      | N                                   |
| AL031772.1   | 0.91453943                             | N                                            | 0                                      | N                                   |
| CCDC157      | 0.91453943                             | N                                            | 0                                      | N                                   |
| CENPBD1      | 0.91453943                             | N                                            | 0                                      | N                                   |
| DSG2         | 0.91453943                             | N                                            | 4                                      | N                                   |
| SH2D4A       | 0.91453943                             | N                                            | 0                                      | N                                   |
| AC060766.5   | 0.914555292                            | N                                            | 0                                      | N                                   |
| DDX21        | 0.914555292                            | N                                            | 0                                      | N                                   |
| PDHB         | 0.914555292                            | N                                            | 9                                      | N                                   |
| AKAP2        | 0.914585397                            | N                                            | 1                                      | N                                   |
| AL355596.1   | 0.914585397                            | N                                            | 0                                      | N                                   |
| ALG1L15P     | 0.914585397                            | N                                            | 0                                      | N                                   |

| Gene symbols  | FDR (differential expression analysis) | Differentially expressed gene? Y, Yes; N, No | Number of insulin related publications | Insulin related gene? Y, Yes; N, No |
|---------------|----------------------------------------|----------------------------------------------|----------------------------------------|-------------------------------------|
| AMER2         | 0.914585397                            | N                                            | 0                                      | N                                   |
| ANXA7         | 0.914585397                            | N                                            | 4                                      | N                                   |
| COX10         | 0.914585397                            | N                                            | 3                                      | N                                   |
| ESR2          | 0.914585397                            | N                                            | 43                                     | N                                   |
| MCM9          | 0.914585397                            | N                                            | 0                                      | N                                   |
| SLC3A1        | 0.914585397                            | N                                            | 0                                      | N                                   |
| AC136632.1    | 0.914600223                            | N                                            | 0                                      | N                                   |
| AC027237.3    | 0.914648125                            | N                                            | 0                                      | N                                   |
| AL031666.3    | 0.914648125                            | N                                            | 0                                      | N                                   |
| AL353743.3    | 0.914648125                            | N                                            | 0                                      | N                                   |
| IRX5          | 0.914648125                            | N                                            | 1                                      | N                                   |
| PMCHL2        | 0.914648125                            | N                                            | 0                                      | N                                   |
| AC009927.1    | 0.914666267                            | N                                            | 0                                      | N                                   |
| PPP1R13L      | 0.914671263                            | N                                            | 0                                      | N                                   |
| UPB1          | 0.914671263                            | N                                            | 0                                      | N                                   |
| IQCB1         | 0.914687513                            | N                                            | 0                                      | N                                   |
| PNKDP1        | 0.914736288                            | N                                            | 0                                      | N                                   |
| PRRT1         | 0.914736288                            | N                                            | 0                                      | N                                   |
| SLC45A3       | 0.914736288                            | N                                            | 2                                      | N                                   |
| CTR9          | 0.914813075                            | N                                            | 0                                      | N                                   |
| FYB1          | 0.914813075                            | N                                            | 0                                      | N                                   |
| PAN3-AS1      | 0.914813075                            | N                                            | 0                                      | N                                   |
| NDUFAF4       | 0.914820261                            | N                                            | 0                                      | N                                   |
| PTPRD-AS1     | 0.914820261                            | N                                            | 0                                      | N                                   |
| AC005840.2    | 0.914875697                            | N                                            | 0                                      | N                                   |
| KCNJ8         | 0.914900171                            | N                                            | 4                                      | N                                   |
| AC106820.4    | 0.915054782                            | N                                            | 0                                      | N                                   |
| AC123769.1    | 0.915054782                            | N                                            | 0                                      | N                                   |
| GUK1          | 0.915054782                            | N                                            | 0                                      | N                                   |
| ZNF433        | 0.915077285                            | N                                            | 0                                      | N                                   |
| SEPHS2        | 0.915101345                            | N                                            | 0                                      | N                                   |
| AC044849.1    | 0.915212545                            | N                                            | 0                                      | N                                   |
| AC080011.1    | 0.915212545                            | N                                            | 0                                      | N                                   |
| HCLS1         | 0.91523753                             | N                                            | 0                                      | N                                   |
| MST1R         | 0.91523753                             | N                                            | 2                                      | N                                   |
| AMER3         | 0.915277423                            | N                                            | 0                                      | N                                   |
| DNAH6         | 0.915277423                            | N                                            | 0                                      | N                                   |
| NAP1L1P3      | 0.915382803                            | N                                            | 0                                      | N                                   |
| RPL3P7        | 0.915382803                            | N                                            | 0                                      | N                                   |
| NDUFAF7       | 0.915433689                            | N                                            | 0                                      | N                                   |
| SLC12A8       | 0.915577706                            | N                                            | 0                                      | N                                   |
| CSGALNACT1    | 0.915596247                            | N                                            | 0                                      | N                                   |
| RP11-427J23.1 | 0.915739173                            | N                                            | 0                                      | N                                   |
| SLCO5A1       | 0.915739173                            | N                                            | 1                                      | N                                   |
| SRF           | 0.915739173                            | N                                            | 70                                     | N                                   |
| TMEM35A       | 0.915739173                            | N                                            | 0                                      | N                                   |
| TRMT13        | 0.915739173                            | N                                            | 0                                      | N                                   |
| ABHD14A       | 0.915751629                            | N                                            | 0                                      | N                                   |
| AC021106.1    | 0.915897575                            | N                                            | 0                                      | N                                   |
| FAM155A-IT1   | 0.916097582                            | N                                            | 0                                      | N                                   |
| IPO4          | 0.916097582                            | N                                            | 0                                      | N                                   |
| KCNA7         | 0.916097582                            | N                                            | 1                                      | N                                   |
| MFSD9         | 0.916097582                            | N                                            | 1                                      | N                                   |
| MRNIP         | 0.916097582                            | N                                            | 0                                      | N                                   |
| SMYD2         | 0.916097582                            | N                                            | 0                                      | N                                   |
| TMEM50A       | 0.916097582                            | N                                            | 0                                      | N                                   |
| Z69733.1      | 0.916097582                            | N                                            | 0                                      | N                                   |
| CNGB1         | 0.916101313                            | N                                            | 1                                      | N                                   |
| DBIL5P2       | 0.916205224                            | N                                            | 0                                      | N                                   |
| PRRG2         | 0.916205224                            | N                                            | 0                                      | N                                   |
| CU634019.6    | 0.916378325                            | N                                            | 0                                      | N                                   |
| FAM86JP       | 0.916378325                            | N                                            | 0                                      | N                                   |
| AL358334.2    | 0.916391893                            | N                                            | 0                                      | N                                   |
| NTF3          | 0.916391893                            | N                                            | 5                                      | N                                   |
| ANXA2P2       | 0.916409637                            | N                                            | 0                                      | N                                   |
| SLC27A2       | 0.916409637                            | N                                            | 10                                     | N                                   |

| Gene symbols | FDR (differential expression analysis) | Differentially expressed gene? Y, Yes; N, No | Number of insulin related publications | Insulin related gene? Y, Yes; N, No |
|--------------|----------------------------------------|----------------------------------------------|----------------------------------------|-------------------------------------|
| SPATA25      | 0.91642928                             | N                                            | 0                                      | N                                   |
| AC020558.3   | 0.91644241                             | N                                            | 0                                      | N                                   |
| AC090819.1   | 0.91644241                             | N                                            | 0                                      | N                                   |
| ACTBP2       | 0.91644241                             | N                                            | 0                                      | N                                   |
| AFAP1-AS1    | 0.91644241                             | N                                            | 0                                      | N                                   |
| AL121790.1   | 0.91644241                             | N                                            | 0                                      | N                                   |
| AL353597.3   | 0.91644241                             | N                                            | 0                                      | N                                   |
| AL356750.1   | 0.91644241                             | N                                            | 0                                      | N                                   |
| ATL3         | 0.91644241                             | N                                            | 0                                      | N                                   |
| ATP5HP4      | 0.91644241                             | N                                            | 0                                      | N                                   |
| B3GAT1       | 0.91644241                             | N                                            | 0                                      | N                                   |
| CD79B        | 0.91644241                             | N                                            | 4                                      | N                                   |
| CDS1         | 0.91644241                             | N                                            | 1                                      | N                                   |
| EAF1-AS1     | 0.91644241                             | N                                            | 0                                      | N                                   |
| FBXO18       | 0.91644241                             | N                                            | 0                                      | N                                   |
| GUCY1A2      | 0.91644241                             | N                                            | 0                                      | N                                   |
| IL11         | 0.91644241                             | N                                            | 42                                     | N                                   |
| LINC00205    | 0.91644241                             | N                                            | 0                                      | N                                   |
| LINC01106    | 0.91644241                             | N                                            | 0                                      | N                                   |
| LINC02080    | 0.91644241                             | N                                            | 0                                      | N                                   |
| LSM1P1       | 0.91644241                             | N                                            | 0                                      | N                                   |
| MAP2K3       | 0.91644241                             | N                                            | 6                                      | N                                   |
| NDUFB2       | 0.91644241                             | N                                            | 0                                      | N                                   |
| PPP1R14A     | 0.91644241                             | N                                            | 1                                      | N                                   |
| RLF          | 0.91644241                             | N                                            | 67                                     | N                                   |
| RPL26        | 0.91644241                             | N                                            | 0                                      | N                                   |
| SCARNA22     | 0.91644241                             | N                                            | 0                                      | N                                   |
| SERPINA10    | 0.91644241                             | N                                            | 0                                      | N                                   |
| ST3GAL4      | 0.91644241                             | N                                            | 2                                      | N                                   |
| SUCLA2P1     | 0.91644241                             | N                                            | 0                                      | N                                   |
| TEF          | 0.91644241                             | N                                            | 55                                     | N                                   |
| TMPRSS4      | 0.91644241                             | N                                            | 0                                      | N                                   |
| TPRG1LP1     | 0.91644241                             | N                                            | 0                                      | N                                   |
| TRABD2B      | 0.91644241                             | N                                            | 0                                      | N                                   |
| TSPY26P      | 0.91644241                             | N                                            | 0                                      | N                                   |
| VWA5B2       | 0.91644241                             | N                                            | 0                                      | N                                   |
| ZDHHC1       | 0.91644241                             | N                                            | 0                                      | N                                   |
| ABCD1        | 0.916453888                            | N                                            | 1                                      | N                                   |
| AC091133.4   | 0.916453888                            | N                                            | 0                                      | N                                   |
| AL157394.1   | 0.916453888                            | N                                            | 0                                      | N                                   |
| C16orf45     | 0.916453888                            | N                                            | 0                                      | N                                   |
| CLEC4A       | 0.916453888                            | N                                            | 0                                      | N                                   |
| IL18R1       | 0.916453888                            | N                                            | 3                                      | N                                   |
| KHNYN        | 0.916453888                            | N                                            | 0                                      | N                                   |
| Metazoa_SRP  | 0.916453888                            | N                                            | 0                                      | N                                   |
| NACAP2       | 0.916453888                            | N                                            | 0                                      | N                                   |
| NEXN-AS1     | 0.916453888                            | N                                            | 0                                      | N                                   |
| PCAT1        | 0.916453888                            | N                                            | 0                                      | N                                   |
| RPL11P3      | 0.916453888                            | N                                            | 0                                      | N                                   |
| SIRPG-AS1    | 0.916453888                            | N                                            | 0                                      | N                                   |
| ST8SIA3      | 0.916453888                            | N                                            | 0                                      | N                                   |
| TADA3        | 0.916453888                            | N                                            | 0                                      | N                                   |
| TDRD9        | 0.916453888                            | N                                            | 0                                      | N                                   |
| AC007431.3   | 0.916663518                            | N                                            | 0                                      | N                                   |
| AC120042.1   | 0.916663518                            | N                                            | 0                                      | N                                   |
| EMC2         | 0.916663518                            | N                                            | 0                                      | N                                   |
| FKBP11       | 0.916663518                            | N                                            | 3                                      | N                                   |
| PDS5A        | 0.916663518                            | N                                            | 0                                      | N                                   |
| AC133065.2   | 0.916681435                            | N                                            | 0                                      | N                                   |
| AL359715.3   | 0.916681435                            | N                                            | 0                                      | N                                   |
| FASTKD1      | 0.916681435                            | N                                            | 0                                      | N                                   |
| PCDHB9       | 0.916681435                            | N                                            | 0                                      | N                                   |
| PKP3         | 0.916681435                            | N                                            | 0                                      | N                                   |
| TESK1        | 0.916681435                            | N                                            | 1                                      | N                                   |
| AC090155.1   | 0.916731375                            | N                                            | 0                                      | N                                   |
| ANOS1        | 0.916897704                            | N                                            | 3                                      | N                                   |

| Gene symbols                 | FDR (differential expression analysis) | Differentially expressed gene? Y, Yes; N, No | Number of insulin related publications | Insulin related gene? Y, Yes; N, No |
|------------------------------|----------------------------------------|----------------------------------------------|----------------------------------------|-------------------------------------|
| LYPD3                        | 0.916963776                            | N                                            | 0                                      | N                                   |
| AC092053.1                   | 0.916996334                            | N                                            | 0                                      | N                                   |
| DZIP3                        | 0.916996334                            | N                                            | 0                                      | N                                   |
| KLF7P1                       | 0.916996334                            | N                                            | 0                                      | N                                   |
| MED16                        | 0.916996334                            | N                                            | 0                                      | N                                   |
| MTMR14                       | 0.916996334                            | N                                            | 2                                      | N                                   |
| PTPDC1                       | 0.917035813                            | N                                            | 0                                      | N                                   |
| AL137026.1                   | 0.917045847                            | N                                            | 0                                      | N                                   |
| CUX2                         | 0.917045847                            | N                                            | 0                                      | N                                   |
| FUT9                         | 0.917045847                            | N                                            | 0                                      | N                                   |
| LTB4R2                       | 0.917045847                            | N                                            | 1                                      | N                                   |
| PADI4                        | 0.917045847                            | N                                            | 4                                      | N                                   |
| ZNF318                       | 0.917161942                            | N                                            | 0                                      | N                                   |
| EEF1B2                       | 0.917165874                            | N                                            | 0                                      | N                                   |
| FGF1                         | 0.917175367                            | N                                            | 177                                    | Y                                   |
| SHH                          | 0.917309855                            | N                                            | 133                                    | Y                                   |
| ZNF730                       | 0.917454388                            | N                                            | 0                                      | N                                   |
| AC034205.1                   | 0.91754208                             | N                                            | 0                                      | N                                   |
| AC110491.1                   | 0.91754208                             | N                                            | 0                                      | N                                   |
| MDC1                         | 0.91754208                             | N                                            | 2                                      | N                                   |
| NOC3L                        | 0.91754208                             | N                                            | 2                                      | N                                   |
| NPM1P51                      | 0.91754208                             | N                                            | 0                                      | N                                   |
| AL139317.3                   | 0.917611399                            | N                                            | 0                                      | N                                   |
| LSM14B                       | 0.917611399                            | N                                            | 1                                      | N                                   |
| PDCD11                       | 0.917611399                            | N                                            | 1                                      | N                                   |
| AL160286.2                   | 0.917623861                            | N                                            | 0                                      | N                                   |
| TTBK1                        | 0.917644154                            | N                                            | 0                                      | N                                   |
| GDI1                         | 0.917654186                            | N                                            | 0                                      | N                                   |
| AC093899.2                   | 0.917661722                            | N                                            | 0                                      | N                                   |
| DPPA4                        | 0.917862008                            | N                                            | 1                                      | N                                   |
| C1orf50                      | 0.918141283                            | N                                            | 0                                      | N                                   |
| FKTN                         | 0.918141283                            | N                                            | 0                                      | N                                   |
| AC134312.5                   | 0.918204245                            | N                                            | 0                                      | N                                   |
| GRB2                         | 0.918204245                            | N                                            | 372                                    | Y                                   |
| AC079834.2                   | 0.918209575                            | N                                            | 0                                      | N                                   |
| AC100858.1                   | 0.918209575                            | N                                            | 0                                      | N                                   |
| AC100821.2                   | 0.918221096                            | N                                            | 0                                      | N                                   |
| ZC3H12C                      | 0.918221096                            | N                                            | 0                                      | N                                   |
| AC010401.3                   | 0.918260712                            | N                                            | 0                                      | N                                   |
| BR13                         | 0.918260712                            | N                                            | 0                                      | N                                   |
| chr22-38_28785274-29006793.1 | 0.918260712                            | N                                            | 0                                      | N                                   |
| CMTM1                        | 0.918260712                            | N                                            | 0                                      | N                                   |
| GPR37L1                      | 0.918260712                            | N                                            | 0                                      | N                                   |
| LLGL2                        | 0.918260712                            | N                                            | 0                                      | N                                   |
| STPG4                        | 0.918260712                            | N                                            | 0                                      | N                                   |
| AC013726.1                   | 0.918366262                            | N                                            | 0                                      | N                                   |
| AC024220.1                   | 0.918366262                            | N                                            | 0                                      | N                                   |
| AC145285.2                   | 0.918366262                            | N                                            | 0                                      | N                                   |
| AL354740.1                   | 0.918366262                            | N                                            | 0                                      | N                                   |
| AL390728.6                   | 0.918366262                            | N                                            | 0                                      | N                                   |
| EXOC3L4                      | 0.918366262                            | N                                            | 0                                      | N                                   |
| GLCCI1                       | 0.918366262                            | N                                            | 0                                      | N                                   |
| LINC00865                    | 0.918366262                            | N                                            | 0                                      | N                                   |
| MYL6P3                       | 0.918366262                            | N                                            | 0                                      | N                                   |
| RPS14                        | 0.918366262                            | N                                            | 1                                      | N                                   |
| SDF4                         | 0.918366262                            | N                                            | 1                                      | N                                   |
| SPN                          | 0.918366262                            | N                                            | 13                                     | N                                   |
| ZNF623                       | 0.918366262                            | N                                            | 0                                      | N                                   |
| PCBP2-OT1                    | 0.918585181                            | N                                            | 0                                      | N                                   |
| AC005954.2                   | 0.918605743                            | N                                            | 0                                      | N                                   |
| AC023090.2                   | 0.91864003                             | N                                            | 0                                      | N                                   |
| DGCR5                        | 0.918656168                            | N                                            | 0                                      | N                                   |
| GTF2F2                       | 0.918688039                            | N                                            | 0                                      | N                                   |
| PKP2                         | 0.918688039                            | N                                            | 1                                      | N                                   |
| UNCX                         | 0.918688039                            | N                                            | 0                                      | N                                   |
| FAM74A6                      | 0.918728361                            | N                                            | 0                                      | N                                   |



| Gene symbols | FDR (differential expression analysis) | Differentially expressed gene? Y, Yes; N, No | Number of insulin related publications | Insulin related gene? Y, Yes; N, No |
|--------------|----------------------------------------|----------------------------------------------|----------------------------------------|-------------------------------------|
| LDHAP2       | 0.918728361                            | N                                            | 0                                      | N                                   |
| MFSD7        | 0.918728361                            | N                                            | 0                                      | N                                   |
| ZBTB7A       | 0.918930944                            | N                                            | 3                                      | N                                   |
| AC004771.3   | 0.918970071                            | N                                            | 0                                      | N                                   |
| AC009065.1   | 0.918970071                            | N                                            | 0                                      | N                                   |
| AC083973.1   | 0.918970071                            | N                                            | 0                                      | N                                   |
| AL121603.2   | 0.918970071                            | N                                            | 0                                      | N                                   |
| AL512383.1   | 0.918970071                            | N                                            | 0                                      | N                                   |
| EIF4EBP1     | 0.918970071                            | N                                            | 244                                    | Y                                   |
| FCRL2        | 0.918970071                            | N                                            | 0                                      | N                                   |
| KIAA0391     | 0.918970071                            | N                                            | 0                                      | N                                   |
| KLK15        | 0.918970071                            | N                                            | 1                                      | N                                   |
| LINC01481    | 0.918970071                            | N                                            | 0                                      | N                                   |
| PAG1         | 0.918970071                            | N                                            | 5                                      | N                                   |
| PPOX         | 0.918970071                            | N                                            | 0                                      | N                                   |
| RPS13P2      | 0.918970071                            | N                                            | 0                                      | N                                   |
| AC097063.1   | 0.918971158                            | N                                            | 0                                      | N                                   |
| AL391988.1   | 0.918971158                            | N                                            | 0                                      | N                                   |
| ANKRD16      | 0.918971158                            | N                                            | 0                                      | N                                   |
| CALM1P2      | 0.918971158                            | N                                            | 0                                      | N                                   |
| FASTK        | 0.918971158                            | N                                            | 0                                      | N                                   |
| LARP4        | 0.918971158                            | N                                            | 0                                      | N                                   |
| OSBPL6       | 0.918971158                            | N                                            | 0                                      | N                                   |
| RNF20        | 0.918971158                            | N                                            | 2                                      | N                                   |
| SYNGR3       | 0.918971158                            | N                                            | 0                                      | N                                   |
| UNC5CL       | 0.918971158                            | N                                            | 0                                      | N                                   |
| WDYHV1       | 0.918971158                            | N                                            | 0                                      | N                                   |
| Z99774.1     | 0.918971158                            | N                                            | 0                                      | N                                   |
| AC092803.2   | 0.919015068                            | N                                            | 0                                      | N                                   |
| AGPS         | 0.919015068                            | N                                            | 1                                      | N                                   |
| EFNA3        | 0.919015068                            | N                                            | 1                                      | N                                   |
| FBXW9        | 0.919015068                            | N                                            | 0                                      | N                                   |
| VPS33A       | 0.919015068                            | N                                            | 0                                      | N                                   |
| AC096543.1   | 0.919044138                            | N                                            | 0                                      | N                                   |
| AP002761.1   | 0.919044138                            | N                                            | 0                                      | N                                   |
| PBX2P1       | 0.919044138                            | N                                            | 0                                      | N                                   |
| AC010136.1   | 0.919105932                            | N                                            | 0                                      | N                                   |
| AL671277.1   | 0.919105932                            | N                                            | 0                                      | N                                   |
| DAAM2        | 0.919105932                            | N                                            | 0                                      | N                                   |
| AC023908.3   | 0.919199158                            | N                                            | 0                                      | N                                   |
| AC099489.3   | 0.919199158                            | N                                            | 0                                      | N                                   |
| E2F3P1       | 0.919199158                            | N                                            | 0                                      | N                                   |
| PPM1D        | 0.919199158                            | N                                            | 3                                      | N                                   |
| SDHCP2       | 0.919199158                            | N                                            | 0                                      | N                                   |
| SIDT1        | 0.919199158                            | N                                            | 0                                      | N                                   |
| ZNF282       | 0.919199158                            | N                                            | 0                                      | N                                   |
| AC112778.1   | 0.919246542                            | N                                            | 0                                      | N                                   |
| AC120114.2   | 0.919246542                            | N                                            | 0                                      | N                                   |
| AC129502.1   | 0.919246542                            | N                                            | 0                                      | N                                   |
| AL645922.1   | 0.919246542                            | N                                            | 0                                      | N                                   |
| CDH26        | 0.919246542                            | N                                            | 0                                      | N                                   |
| TERF2        | 0.919246542                            | N                                            | 0                                      | N                                   |
| ZBED5        | 0.919246542                            | N                                            | 0                                      | N                                   |
| AL133480.2   | 0.919289557                            | N                                            | 0                                      | N                                   |
| ATP6V1D      | 0.919289557                            | N                                            | 0                                      | N                                   |
| CTNNA2       | 0.919289557                            | N                                            | 1                                      | N                                   |
| SNX21        | 0.919289557                            | N                                            | 0                                      | N                                   |
| UXT-AS1      | 0.919289557                            | N                                            | 0                                      | N                                   |
| AC008915.1   | 0.919326312                            | N                                            | 0                                      | N                                   |
| AC010867.1   | 0.919326312                            | N                                            | 0                                      | N                                   |
| AC011700.1   | 0.919326312                            | N                                            | 0                                      | N                                   |
| AC018644.1   | 0.919326312                            | N                                            | 0                                      | N                                   |
| AC018755.3   | 0.919326312                            | N                                            | 0                                      | N                                   |
| AC021087.2   | 0.919326312                            | N                                            | 0                                      | N                                   |
| AC027796.3   | 0.919326312                            | N                                            | 0                                      | N                                   |
| AC037486.1   | 0.919326312                            | N                                            | 0                                      | N                                   |

| Gene symbols  | FDR (differential expression analysis) | Differentially expressed gene? Y, Yes; N, No | Number of insulin related publications | Insulin related gene? Y, Yes; N, No |
|---------------|----------------------------------------|----------------------------------------------|----------------------------------------|-------------------------------------|
| AC093909.6    | 0.919326312                            | N                                            | 0                                      | N                                   |
| AC110769.2    | 0.919326312                            | N                                            | 0                                      | N                                   |
| AC114811.2    | 0.919326312                            | N                                            | 0                                      | N                                   |
| AC132938.2    | 0.919326312                            | N                                            | 0                                      | N                                   |
| AL132642.2    | 0.919326312                            | N                                            | 0                                      | N                                   |
| AL731556.1    | 0.919326312                            | N                                            | 0                                      | N                                   |
| AP000866.2    | 0.919326312                            | N                                            | 0                                      | N                                   |
| AREG          | 0.919326312                            | N                                            | 29                                     | N                                   |
| BOLA2-SMG1P6  | 0.919326312                            | N                                            | 0                                      | N                                   |
| CDADC1        | 0.919326312                            | N                                            | 0                                      | N                                   |
| FBXO16        | 0.919326312                            | N                                            | 0                                      | N                                   |
| HNRNPDP1      | 0.919326312                            | N                                            | 0                                      | N                                   |
| IL21R         | 0.919326312                            | N                                            | 17                                     | N                                   |
| LAMTOR3P2     | 0.919326312                            | N                                            | 0                                      | N                                   |
| MMP10         | 0.919326312                            | N                                            | 5                                      | N                                   |
| PGM2          | 0.919326312                            | N                                            | 4                                      | N                                   |
| PTBP3         | 0.919326312                            | N                                            | 2                                      | N                                   |
| RP11-467J12.4 | 0.919326312                            | N                                            | 0                                      | N                                   |
| SUCLG1        | 0.919326312                            | N                                            | 3                                      | N                                   |
| USPL1         | 0.919326312                            | N                                            | 0                                      | N                                   |
| YAP1P1        | 0.919326312                            | N                                            | 0                                      | N                                   |
| ZNF829        | 0.919326312                            | N                                            | 0                                      | N                                   |
| SIPA1L3       | 0.919350746                            | N                                            | 0                                      | N                                   |
| SPIDR         | 0.919365175                            | N                                            | 0                                      | N                                   |
| AC113382.1    | 0.91942531                             | N                                            | 0                                      | N                                   |
| GOLGA7B       | 0.919498409                            | N                                            | 0                                      | N                                   |
| MOB3C         | 0.919571803                            | N                                            | 0                                      | N                                   |
| NYAP2         | 0.919571803                            | N                                            | 1                                      | N                                   |
| RPEP4         | 0.919571803                            | N                                            | 0                                      | N                                   |
| SECISBP2      | 0.919571803                            | N                                            | 1                                      | N                                   |
| PIIP5K2       | 0.919586925                            | N                                            | 2                                      | N                                   |
| AC007681.1    | 0.919658205                            | N                                            | 0                                      | N                                   |
| AC098850.1    | 0.919658205                            | N                                            | 0                                      | N                                   |
| AKR1E2        | 0.919658205                            | N                                            | 0                                      | N                                   |
| AP001999.1    | 0.919658205                            | N                                            | 0                                      | N                                   |
| DCAF4L1       | 0.919658205                            | N                                            | 0                                      | N                                   |
| ECE2          | 0.919658205                            | N                                            | 3                                      | N                                   |
| EPHX4         | 0.919658205                            | N                                            | 0                                      | N                                   |
| IRX2          | 0.919658205                            | N                                            | 5                                      | N                                   |
| RN7SL7P       | 0.919658205                            | N                                            | 0                                      | N                                   |
| YWHAZ         | 0.919658205                            | N                                            | 10                                     | N                                   |
| ZCCHC10       | 0.919658205                            | N                                            | 0                                      | N                                   |
| SF3B6         | 0.91966736                             | N                                            | 0                                      | N                                   |
| AC004898.1    | 0.919698358                            | N                                            | 0                                      | N                                   |
| AC243960.2    | 0.919698358                            | N                                            | 0                                      | N                                   |
| AL354811.1    | 0.919698358                            | N                                            | 0                                      | N                                   |
| AL356801.1    | 0.919698358                            | N                                            | 0                                      | N                                   |
| ANKRD34C-AS1  | 0.919698358                            | N                                            | 0                                      | N                                   |
| FAM9B         | 0.919698358                            | N                                            | 1                                      | N                                   |
| KAT6A         | 0.919698358                            | N                                            | 0                                      | N                                   |
| NNAT          | 0.919698358                            | N                                            | 29                                     | N                                   |
| SLC9A3-AS1    | 0.919698358                            | N                                            | 0                                      | N                                   |
| VWA8-AS1      | 0.919698358                            | N                                            | 0                                      | N                                   |
| F5            | 0.919710218                            | N                                            | 27                                     | N                                   |
| RN7SL615P     | 0.919710218                            | N                                            | 0                                      | N                                   |
| AC073352.1    | 0.91971898                             | N                                            | 0                                      | N                                   |
| AL080243.2    | 0.91971898                             | N                                            | 0                                      | N                                   |
| TRPV3         | 0.91971898                             | N                                            | 4                                      | N                                   |
| ZNF581        | 0.91971898                             | N                                            | 0                                      | N                                   |
| MARCH7        | 0.91976027                             | N                                            | 0                                      | N                                   |
| AC090772.4    | 0.91976027                             | N                                            | 0                                      | N                                   |
| AC245884.8    | 0.91976027                             | N                                            | 0                                      | N                                   |
| BTNL9         | 0.91976027                             | N                                            | 0                                      | N                                   |
| C11orf52      | 0.91976027                             | N                                            | 0                                      | N                                   |
| CCDC103       | 0.91976027                             | N                                            | 0                                      | N                                   |
| CCDC73        | 0.91976027                             | N                                            | 0                                      | N                                   |

| Gene symbols | FDR (differential expression analysis) | Differentially expressed gene? Y, Yes; N, No | Number of insulin related publications | Insulin related gene? Y, Yes; N, No |
|--------------|----------------------------------------|----------------------------------------------|----------------------------------------|-------------------------------------|
| CKMT2-AS1    | 0.91976027                             | N                                            | 0                                      | N                                   |
| COX16        | 0.91976027                             | N                                            | 0                                      | N                                   |
| FSCN1P1      | 0.91976027                             | N                                            | 0                                      | N                                   |
| LINC01844    | 0.91976027                             | N                                            | 0                                      | N                                   |
| LINC02057    | 0.91976027                             | N                                            | 0                                      | N                                   |
| LPAR1        | 0.91976027                             | N                                            | 0                                      | N                                   |
| MUC2         | 0.91976027                             | N                                            | 16                                     | N                                   |
| NRG3         | 0.91976027                             | N                                            | 2                                      | N                                   |
| PCNPP5       | 0.91976027                             | N                                            | 0                                      | N                                   |
| PKMP1        | 0.91976027                             | N                                            | 0                                      | N                                   |
| PPID         | 0.91976027                             | N                                            | 24                                     | N                                   |
| PPM1B        | 0.91976027                             | N                                            | 5                                      | N                                   |
| RAP1GDS1     | 0.91976027                             | N                                            | 0                                      | N                                   |
| ROMO1        | 0.91976027                             | N                                            | 1                                      | N                                   |
| RPF2         | 0.91976027                             | N                                            | 0                                      | N                                   |
| RRAGA        | 0.91976027                             | N                                            | 2                                      | N                                   |
| SPAAR        | 0.91976027                             | N                                            | 0                                      | N                                   |
| SUGT1P1      | 0.91976027                             | N                                            | 0                                      | N                                   |
| UGDH-AS1     | 0.91976027                             | N                                            | 0                                      | N                                   |
| USP28        | 0.91976027                             | N                                            | 1                                      | N                                   |
| VDAC1P1      | 0.91976027                             | N                                            | 0                                      | N                                   |
| ZNF100       | 0.91976027                             | N                                            | 0                                      | N                                   |
| ZNF407       | 0.91976027                             | N                                            | 2                                      | N                                   |
| PPARGC1B     | 0.919780479                            | N                                            | 33                                     | N                                   |
| CFHR1        | 0.919950249                            | N                                            | 1                                      | N                                   |
| ZNF552       | 0.919950249                            | N                                            | 0                                      | N                                   |
| GLIS2        | 0.919959237                            | N                                            | 6                                      | N                                   |
| SLC19A2      | 0.919959237                            | N                                            | 20                                     | N                                   |
| AP003393.1   | 0.920024859                            | N                                            | 0                                      | N                                   |
| MBOAT7       | 0.920073762                            | N                                            | 7                                      | N                                   |
| AC083862.2   | 0.920251526                            | N                                            | 0                                      | N                                   |
| AC090971.5   | 0.920251526                            | N                                            | 0                                      | N                                   |
| AC145207.2   | 0.920251526                            | N                                            | 0                                      | N                                   |
| AL009174.1   | 0.920251526                            | N                                            | 0                                      | N                                   |
| BHLHB9       | 0.920251526                            | N                                            | 1                                      | N                                   |
| BLOC1S2      | 0.920251526                            | N                                            | 0                                      | N                                   |
| FBXL18       | 0.920251526                            | N                                            | 0                                      | N                                   |
| FPGS         | 0.920251526                            | N                                            | 2                                      | N                                   |
| GNB2         | 0.920251526                            | N                                            | 2                                      | N                                   |
| IL1RAPL2     | 0.920251526                            | N                                            | 0                                      | N                                   |
| LACTB2-AS1   | 0.920251526                            | N                                            | 0                                      | N                                   |
| NALT1        | 0.920251526                            | N                                            | 0                                      | N                                   |
| NFATC3       | 0.920251526                            | N                                            | 18                                     | N                                   |
| PRKAG2       | 0.920251526                            | N                                            | 12                                     | N                                   |
| RPL7L1P3     | 0.920251526                            | N                                            | 0                                      | N                                   |
| TMOD3        | 0.920251526                            | N                                            | 2                                      | N                                   |
| AP001972.4   | 0.920262245                            | N                                            | 0                                      | N                                   |
| ISLR2        | 0.920262245                            | N                                            | 0                                      | N                                   |
| PARP3        | 0.920262245                            | N                                            | 0                                      | N                                   |
| TSEN2P1      | 0.920262245                            | N                                            | 0                                      | N                                   |
| PROX1        | 0.920375745                            | N                                            | 32                                     | N                                   |
| CASKIN2      | 0.920489582                            | N                                            | 0                                      | N                                   |
| FAT2         | 0.920489582                            | N                                            | 0                                      | N                                   |
| NDUFB11      | 0.920538922                            | N                                            | 0                                      | N                                   |
| AGTRAP       | 0.920567543                            | N                                            | 11                                     | N                                   |
| FUK          | 0.920567543                            | N                                            | 0                                      | N                                   |
| PTGDR2       | 0.920567543                            | N                                            | 2                                      | N                                   |
| AL021368.2   | 0.920587122                            | N                                            | 0                                      | N                                   |
| HLA-B        | 0.920587122                            | N                                            | 166                                    | Y                                   |
| STK25        | 0.920587122                            | N                                            | 11                                     | N                                   |
| AC135178.5   | 0.920613392                            | N                                            | 0                                      | N                                   |
| RN7SL47P     | 0.920623454                            | N                                            | 0                                      | N                                   |
| AC104966.1   | 0.920659919                            | N                                            | 0                                      | N                                   |
| AL357373.1   | 0.920659919                            | N                                            | 0                                      | N                                   |
| CIDECP       | 0.920659919                            | N                                            | 0                                      | N                                   |
| DDX6P2       | 0.920659919                            | N                                            | 0                                      | N                                   |

| Gene symbols | FDR (differential expression analysis) | Differentially expressed gene? Y, Yes; N, No | Number of insulin related publications | Insulin related gene? Y, Yes; N, No |
|--------------|----------------------------------------|----------------------------------------------|----------------------------------------|-------------------------------------|
| MKNK2        | 0.920659919                            | N                                            | 8                                      | N                                   |
| AC009336.2   | 0.920688683                            | N                                            | 0                                      | N                                   |
| AC120036.1   | 0.920688683                            | N                                            | 0                                      | N                                   |
| AL049646.1   | 0.920688683                            | N                                            | 0                                      | N                                   |
| ARF4P3       | 0.920688683                            | N                                            | 0                                      | N                                   |
| EIF5B        | 0.920688683                            | N                                            | 1                                      | N                                   |
| GVQW1        | 0.920688683                            | N                                            | 0                                      | N                                   |
| HOXC12       | 0.920688683                            | N                                            | 0                                      | N                                   |
| LINC00342    | 0.920688683                            | N                                            | 0                                      | N                                   |
| RAB43        | 0.920688683                            | N                                            | 1                                      | N                                   |
| SEC11C       | 0.920688683                            | N                                            | 0                                      | N                                   |
| SELL         | 0.920688683                            | N                                            | 108                                    | Y                                   |
| TBK1         | 0.920688683                            | N                                            | 24                                     | N                                   |
| AF013593.1   | 0.920717344                            | N                                            | 0                                      | N                                   |
| AP003392.5   | 0.920717344                            | N                                            | 0                                      | N                                   |
| HERC2P3      | 0.920717344                            | N                                            | 0                                      | N                                   |
| LINC00959    | 0.920717344                            | N                                            | 0                                      | N                                   |
| PRDM8        | 0.920717344                            | N                                            | 1                                      | N                                   |
| TPTE2        | 0.920717344                            | N                                            | 0                                      | N                                   |
| TRAPPC6B     | 0.920717344                            | N                                            | 0                                      | N                                   |
| Z74021.1     | 0.920717344                            | N                                            | 0                                      | N                                   |
| AC008074.3   | 0.920725365                            | N                                            | 0                                      | N                                   |
| AC139100.2   | 0.920725365                            | N                                            | 0                                      | N                                   |
| AC244093.4   | 0.920725365                            | N                                            | 0                                      | N                                   |
| ADGRG7       | 0.920725365                            | N                                            | 0                                      | N                                   |
| LTBP4        | 0.920725365                            | N                                            | 2                                      | N                                   |
| MITD1        | 0.920725365                            | N                                            | 0                                      | N                                   |
| NUTM2A-AS1   | 0.920725365                            | N                                            | 0                                      | N                                   |
| TTC29        | 0.920725365                            | N                                            | 1                                      | N                                   |
| NUDT14       | 0.920750311                            | N                                            | 0                                      | N                                   |
| WWC1         | 0.920750311                            | N                                            | 0                                      | N                                   |
| CALM2P2      | 0.920770742                            | N                                            | 0                                      | N                                   |
| MRGPRF       | 0.920770742                            | N                                            | 0                                      | N                                   |
| TMED2        | 0.920795089                            | N                                            | 0                                      | N                                   |
| AC010342.1   | 0.920807271                            | N                                            | 0                                      | N                                   |
| AC097059.1   | 0.920807271                            | N                                            | 0                                      | N                                   |
| ACTR1B       | 0.920807271                            | N                                            | 0                                      | N                                   |
| AL049757.1   | 0.920807271                            | N                                            | 0                                      | N                                   |
| AL732372.2   | 0.920807271                            | N                                            | 0                                      | N                                   |
| CLIP2        | 0.920807271                            | N                                            | 2                                      | N                                   |
| COX10-AS1    | 0.920807271                            | N                                            | 0                                      | N                                   |
| EIF2S2P4     | 0.920807271                            | N                                            | 0                                      | N                                   |
| FERMT1       | 0.920807271                            | N                                            | 0                                      | N                                   |
| HSD17B7P1    | 0.920807271                            | N                                            | 0                                      | N                                   |
| NOP14        | 0.920807271                            | N                                            | 0                                      | N                                   |
| SNX4         | 0.920807271                            | N                                            | 1                                      | N                                   |
| ZSCAN30      | 0.920807271                            | N                                            | 0                                      | N                                   |
| AC009309.1   | 0.920863877                            | N                                            | 0                                      | N                                   |
| IKBKB        | 0.92087213                             | N                                            | 251                                    | Y                                   |
| SPRN         | 0.92087213                             | N                                            | 0                                      | N                                   |
| AC006329.1   | 0.920877292                            | N                                            | 0                                      | N                                   |
| DUX4L16      | 0.920924178                            | N                                            | 0                                      | N                                   |
| AL662899.3   | 0.920961194                            | N                                            | 0                                      | N                                   |
| KRT19P1      | 0.920961194                            | N                                            | 0                                      | N                                   |
| SLC31A2      | 0.920961194                            | N                                            | 1                                      | N                                   |
| AC004951.3   | 0.921023524                            | N                                            | 0                                      | N                                   |
| AC012065.4   | 0.921023524                            | N                                            | 0                                      | N                                   |
| AL080243.1   | 0.921023524                            | N                                            | 0                                      | N                                   |
| AL357054.3   | 0.921023524                            | N                                            | 0                                      | N                                   |
| AP002490.1   | 0.921023524                            | N                                            | 0                                      | N                                   |
| ARHGAP22     | 0.921023524                            | N                                            | 0                                      | N                                   |
| GOT2P2       | 0.921023524                            | N                                            | 0                                      | N                                   |
| GUCA1A       | 0.921023524                            | N                                            | 0                                      | N                                   |
| MEF2C-AS1    | 0.921023524                            | N                                            | 0                                      | N                                   |
| ZNF678       | 0.921023524                            | N                                            | 0                                      | N                                   |
| SNORA46      | 0.921024271                            | N                                            | 0                                      | N                                   |

| Gene symbols | FDR (differential expression analysis) | Differentially expressed gene? Y, Yes; N, No | Number of insulin related publications | Insulin related gene? Y, Yes; N, No |
|--------------|----------------------------------------|----------------------------------------------|----------------------------------------|-------------------------------------|
| FAM92A1P2    | 0.921118973                            | N                                            | 0                                      | N                                   |
| AGTPBP1      | 0.921182544                            | N                                            | 0                                      | N                                   |
| AP003038.1   | 0.921182544                            | N                                            | 0                                      | N                                   |
| FP671120.1   | 0.921182544                            | N                                            | 0                                      | N                                   |
| NDUFB8       | 0.921182544                            | N                                            | 1                                      | N                                   |
| PSENE1       | 0.921182544                            | N                                            | 0                                      | N                                   |
| SLC9C1       | 0.921182544                            | N                                            | 0                                      | N                                   |
| TM9SF1       | 0.921182544                            | N                                            | 0                                      | N                                   |
| GOLM1        | 0.921222025                            | N                                            | 0                                      | N                                   |
| AC104825.1   | 0.921239029                            | N                                            | 0                                      | N                                   |
| AL136311.1   | 0.921239029                            | N                                            | 0                                      | N                                   |
| SNX17        | 0.921239029                            | N                                            | 1                                      | N                                   |
| AC011468.1   | 0.921264063                            | N                                            | 0                                      | N                                   |
| BBS5         | 0.921264063                            | N                                            | 1                                      | N                                   |
| CHKB-CPT1B   | 0.921308708                            | N                                            | 0                                      | N                                   |
| FN3K         | 0.921308708                            | N                                            | 2                                      | N                                   |
| PIM1         | 0.921350986                            | N                                            | 5                                      | N                                   |
| MAPKBP1      | 0.921410808                            | N                                            | 0                                      | N                                   |
| SLC10A7      | 0.921461321                            | N                                            | 0                                      | N                                   |
| LINC02099    | 0.921534316                            | N                                            | 0                                      | N                                   |
| IPO7         | 0.921574827                            | N                                            | 0                                      | N                                   |
| SLC23A3      | 0.921574827                            | N                                            | 0                                      | N                                   |
| TPP2         | 0.921574827                            | N                                            | 0                                      | N                                   |
| HGNC:18790   | 0.92172501                             | N                                            | 0                                      | N                                   |
| PACSN3       | 0.921738745                            | N                                            | 1                                      | N                                   |
| KCNC1        | 0.921776714                            | N                                            | 1                                      | N                                   |
| NCOR2        | 0.921776714                            | N                                            | 14                                     | N                                   |
| MARCH4       | 0.921835693                            | N                                            | 0                                      | N                                   |
| AGGF1P8      | 0.921835693                            | N                                            | 0                                      | N                                   |
| AL138895.2   | 0.921835693                            | N                                            | 0                                      | N                                   |
| ELMO1        | 0.921835693                            | N                                            | 3                                      | N                                   |
| GDF5         | 0.921835693                            | N                                            | 5                                      | N                                   |
| HTRA4        | 0.921835693                            | N                                            | 0                                      | N                                   |
| PCDH17       | 0.921835693                            | N                                            | 1                                      | N                                   |
| RFFL         | 0.921835693                            | N                                            | 0                                      | N                                   |
| RP1L1        | 0.921835693                            | N                                            | 0                                      | N                                   |
| BRWD1P1      | 0.921851697                            | N                                            | 0                                      | N                                   |
| AIP          | 0.92192034                             | N                                            | 91                                     | N                                   |
| AL359922.2   | 0.92192034                             | N                                            | 0                                      | N                                   |
| ETF1P1       | 0.92192034                             | N                                            | 0                                      | N                                   |
| NWD1         | 0.92192034                             | N                                            | 1                                      | N                                   |
| PCCB         | 0.92192034                             | N                                            | 0                                      | N                                   |
| RABL2B       | 0.92192034                             | N                                            | 0                                      | N                                   |
| TAT          | 0.92192034                             | N                                            | 207                                    | Y                                   |
| UIMC1        | 0.92192034                             | N                                            | 0                                      | N                                   |
| GABPAP       | 0.921939135                            | N                                            | 0                                      | N                                   |
| TACR2        | 0.921939135                            | N                                            | 0                                      | N                                   |
| AL049597.2   | 0.921973661                            | N                                            | 0                                      | N                                   |
| C11orf70     | 0.922046432                            | N                                            | 0                                      | N                                   |
| AL442125.1   | 0.922076295                            | N                                            | 0                                      | N                                   |
| TMEM191A     | 0.922078381                            | N                                            | 0                                      | N                                   |
| EAF2         | 0.92239392                             | N                                            | 0                                      | N                                   |
| PTS          | 0.92239392                             | N                                            | 91                                     | N                                   |
| SLC35D1      | 0.922406911                            | N                                            | 0                                      | N                                   |
| AC007038.2   | 0.922466805                            | N                                            | 0                                      | N                                   |
| AL353740.1   | 0.922466805                            | N                                            | 0                                      | N                                   |
| DHX29        | 0.922524294                            | N                                            | 0                                      | N                                   |
| EXOC6        | 0.922524294                            | N                                            | 1                                      | N                                   |
| LINC01435    | 0.922524294                            | N                                            | 0                                      | N                                   |
| A2M-AS1      | 0.922627322                            | N                                            | 0                                      | N                                   |
| AC005000.1   | 0.922627322                            | N                                            | 0                                      | N                                   |
| AC008937.3   | 0.922627322                            | N                                            | 0                                      | N                                   |
| AC010547.1   | 0.922627322                            | N                                            | 0                                      | N                                   |
| AC011611.1   | 0.922627322                            | N                                            | 0                                      | N                                   |
| AC012645.4   | 0.922627322                            | N                                            | 0                                      | N                                   |
| AKIRIN2      | 0.922627322                            | N                                            | 0                                      | N                                   |

| Gene symbols | FDR (differential expression analysis) | Differentially expressed gene? Y, Yes; N, No | Number of insulin related publications | Insulin related gene? Y, Yes; N, No |
|--------------|----------------------------------------|----------------------------------------------|----------------------------------------|-------------------------------------|
| AL355388.2   | 0.922627322                            | N                                            | 0                                      | N                                   |
| AL604028.2   | 0.922627322                            | N                                            | 0                                      | N                                   |
| CFAP43       | 0.922627322                            | N                                            | 0                                      | N                                   |
| CRLF1        | 0.922627322                            | N                                            | 2                                      | N                                   |
| EBF1         | 0.922627322                            | N                                            | 17                                     | N                                   |
| ESRRAP2      | 0.922627322                            | N                                            | 0                                      | N                                   |
| FAM222A      | 0.922627322                            | N                                            | 0                                      | N                                   |
| ILK          | 0.922627322                            | N                                            | 35                                     | N                                   |
| LINC00678    | 0.922627322                            | N                                            | 0                                      | N                                   |
| MYH14        | 0.922627322                            | N                                            | 1                                      | N                                   |
| PROZ         | 0.922627322                            | N                                            | 0                                      | N                                   |
| PYROXD1      | 0.922627322                            | N                                            | 0                                      | N                                   |
| RNVU1-14     | 0.922627322                            | N                                            | 0                                      | N                                   |
| SLC16A3      | 0.922627322                            | N                                            | 3                                      | N                                   |
| AC009163.1   | 0.922686406                            | N                                            | 0                                      | N                                   |
| AL031313.1   | 0.922686406                            | N                                            | 0                                      | N                                   |
| AL606760.1   | 0.922686406                            | N                                            | 0                                      | N                                   |
| MAP3K20      | 0.922726534                            | N                                            | 0                                      | N                                   |
| RPS20P10     | 0.922726534                            | N                                            | 0                                      | N                                   |
| DUX4L18      | 0.922763178                            | N                                            | 0                                      | N                                   |
| FAM173A      | 0.922763178                            | N                                            | 0                                      | N                                   |
| Metazoa_SRP  | 0.922763178                            | N                                            | 0                                      | N                                   |
| UBL5P2       | 0.922763178                            | N                                            | 0                                      | N                                   |
| KLHL35       | 0.922845592                            | N                                            | 0                                      | N                                   |
| AC008443.5   | 0.9228489                              | N                                            | 0                                      | N                                   |
| SPRY4        | 0.922897459                            | N                                            | 6                                      | N                                   |
| NBPF25P      | 0.922910261                            | N                                            | 0                                      | N                                   |
| FP325332.1   | 0.922937978                            | N                                            | 0                                      | N                                   |
| HLA-K        | 0.922937978                            | N                                            | 0                                      | N                                   |
| SHB          | 0.922937978                            | N                                            | 17                                     | N                                   |
| TIMMDC1      | 0.922937978                            | N                                            | 0                                      | N                                   |
| FAM104A      | 0.923181132                            | N                                            | 0                                      | N                                   |
| TMEM266      | 0.923264146                            | N                                            | 0                                      | N                                   |
| LINC01588    | 0.923343848                            | N                                            | 0                                      | N                                   |
| CFDP1        | 0.92335092                             | N                                            | 0                                      | N                                   |
| CPSF1        | 0.92335092                             | N                                            | 0                                      | N                                   |
| DMBT1P1      | 0.92335092                             | N                                            | 0                                      | N                                   |
| RTL6         | 0.92335092                             | N                                            | 0                                      | N                                   |
| TIAF1        | 0.92335092                             | N                                            | 0                                      | N                                   |
| TMEM229A     | 0.92335092                             | N                                            | 0                                      | N                                   |
| AL606834.3   | 0.923352915                            | N                                            | 0                                      | N                                   |
| AL450345.1   | 0.923403888                            | N                                            | 0                                      | N                                   |
| AC016877.1   | 0.923523956                            | N                                            | 0                                      | N                                   |
| CACNB3       | 0.923523956                            | N                                            | 2                                      | N                                   |
| AC007342.4   | 0.923559854                            | N                                            | 0                                      | N                                   |
| AC022274.1   | 0.923559854                            | N                                            | 0                                      | N                                   |
| SAMD15       | 0.923559854                            | N                                            | 0                                      | N                                   |
| MFAP4        | 0.923601796                            | N                                            | 1                                      | N                                   |
| PAQR9-AS1    | 0.923609302                            | N                                            | 0                                      | N                                   |
| AC010864.1   | 0.923671111                            | N                                            | 0                                      | N                                   |
| AC069240.2   | 0.923671111                            | N                                            | 0                                      | N                                   |
| PCBD1        | 0.923671111                            | N                                            | 4                                      | N                                   |
| LDLRAP1      | 0.923747365                            | N                                            | 0                                      | N                                   |
| LCNL1        | 0.923932845                            | N                                            | 0                                      | N                                   |
| DDX6         | 0.923991447                            | N                                            | 1                                      | N                                   |
| DUSP2        | 0.923991447                            | N                                            | 3                                      | N                                   |
| ZNF414       | 0.923991447                            | N                                            | 0                                      | N                                   |
| SEPT3        | 0.92400845                             | N                                            | 0                                      | N                                   |
| PMS1         | 0.924083984                            | N                                            | 0                                      | N                                   |
| AC012368.1   | 0.924246784                            | N                                            | 0                                      | N                                   |
| NDUFS5       | 0.924261989                            | N                                            | 1                                      | N                                   |
| AC034238.1   | 0.924275079                            | N                                            | 0                                      | N                                   |
| B3GNT7       | 0.924312948                            | N                                            | 0                                      | N                                   |
| POLR3C       | 0.92454345                             | N                                            | 0                                      | N                                   |
| RASA2-IT1    | 0.92454345                             | N                                            | 0                                      | N                                   |
| RN7SL834P    | 0.92454345                             | N                                            | 0                                      | N                                   |

| Gene symbols | FDR (differential expression analysis) | Differentially expressed gene? Y, Yes; N, No | Number of insulin related publications | Insulin related gene? Y, Yes; N, No |
|--------------|----------------------------------------|----------------------------------------------|----------------------------------------|-------------------------------------|
| ZFY          | 0.92454345                             | N                                            | 0                                      | N                                   |
| FAM201B      | 0.924708258                            | N                                            | 0                                      | N                                   |
| PFN1P1       | 0.924708258                            | N                                            | 0                                      | N                                   |
| TDRKH-AS1    | 0.924708258                            | N                                            | 0                                      | N                                   |
| TEX14        | 0.924708258                            | N                                            | 1                                      | N                                   |
| AC026461.3   | 0.924713745                            | N                                            | 0                                      | N                                   |
| AC078809.1   | 0.924713745                            | N                                            | 0                                      | N                                   |
| AC092070.2   | 0.924713745                            | N                                            | 0                                      | N                                   |
| AL049873.2   | 0.924713745                            | N                                            | 0                                      | N                                   |
| AL356512.1   | 0.924713745                            | N                                            | 0                                      | N                                   |
| AP002748.4   | 0.924713745                            | N                                            | 0                                      | N                                   |
| AP3M1        | 0.924713745                            | N                                            | 0                                      | N                                   |
| CNN3P1       | 0.924713745                            | N                                            | 0                                      | N                                   |
| COQ8A        | 0.924713745                            | N                                            | 0                                      | N                                   |
| CTA-544A11.1 | 0.924713745                            | N                                            | 0                                      | N                                   |
| DCUN1D5      | 0.924713745                            | N                                            | 0                                      | N                                   |
| GLB1L        | 0.924713745                            | N                                            | 0                                      | N                                   |
| GLIPR1       | 0.924713745                            | N                                            | 0                                      | N                                   |
| LINC00449    | 0.924713745                            | N                                            | 0                                      | N                                   |
| PER2         | 0.924713745                            | N                                            | 72                                     | N                                   |
| PHEX         | 0.924713745                            | N                                            | 11                                     | N                                   |
| RN7SL650P    | 0.924713745                            | N                                            | 0                                      | N                                   |
| ROCK2        | 0.924713745                            | N                                            | 23                                     | N                                   |
| RPS28P7      | 0.924713745                            | N                                            | 0                                      | N                                   |
| SGK3         | 0.924713745                            | N                                            | 16                                     | N                                   |
| TAGLN2       | 0.924713745                            | N                                            | 4                                      | N                                   |
| SSC5D        | 0.924750962                            | N                                            | 0                                      | N                                   |
| FNIP2        | 0.92484947                             | N                                            | 1                                      | N                                   |
| GCC2-AS1     | 0.924985703                            | N                                            | 0                                      | N                                   |
| NFRKB        | 0.925044993                            | N                                            | 0                                      | N                                   |
| ZKSCAN4      | 0.925054395                            | N                                            | 0                                      | N                                   |
| C14orf166    | 0.925126889                            | N                                            | 0                                      | N                                   |
| LINC01562    | 0.925126889                            | N                                            | 0                                      | N                                   |
| AL513327.3   | 0.925139295                            | N                                            | 0                                      | N                                   |
| NOL9         | 0.925203749                            | N                                            | 0                                      | N                                   |
| AC002985.2   | 0.925207256                            | N                                            | 0                                      | N                                   |
| AC004839.1   | 0.925207256                            | N                                            | 0                                      | N                                   |
| AC093484.2   | 0.925207256                            | N                                            | 0                                      | N                                   |
| AC113367.2   | 0.925207256                            | N                                            | 0                                      | N                                   |
| LINP1        | 0.925207256                            | N                                            | 1                                      | N                                   |
| SEC14L1P1    | 0.925588513                            | N                                            | 0                                      | N                                   |
| AC090617.6   | 0.925667601                            | N                                            | 0                                      | N                                   |
| AC097721.1   | 0.925667601                            | N                                            | 0                                      | N                                   |
| AC115618.2   | 0.925667601                            | N                                            | 0                                      | N                                   |
| IL17D        | 0.925667601                            | N                                            | 0                                      | N                                   |
| RHOB         | 0.925667601                            | N                                            | 12                                     | N                                   |
| AP3M2        | 0.925860541                            | N                                            | 0                                      | N                                   |
| E2F5         | 0.925860541                            | N                                            | 0                                      | N                                   |
| EGFLAM       | 0.925860541                            | N                                            | 0                                      | N                                   |
| FP671120.4   | 0.925860541                            | N                                            | 0                                      | N                                   |
| CNPY3        | 0.92603726                             | N                                            | 0                                      | N                                   |
| VWC2         | 0.926080263                            | N                                            | 0                                      | N                                   |
| AC097376.1   | 0.926097258                            | N                                            | 0                                      | N                                   |
| C1orf56      | 0.926116996                            | N                                            | 0                                      | N                                   |
| FRY          | 0.926116996                            | N                                            | 75                                     | N                                   |
| GLB1L2       | 0.926116996                            | N                                            | 0                                      | N                                   |
| HAR1A        | 0.926116996                            | N                                            | 0                                      | N                                   |
| NOP53        | 0.926116996                            | N                                            | 0                                      | N                                   |
| SPEG         | 0.926116996                            | N                                            | 0                                      | N                                   |
| AL391597.1   | 0.926176548                            | N                                            | 0                                      | N                                   |
| CC2D1B       | 0.926184459                            | N                                            | 0                                      | N                                   |
| NDUFV2P1     | 0.926184459                            | N                                            | 0                                      | N                                   |
| SDCBP        | 0.926184459                            | N                                            | 3                                      | N                                   |
| AL606760.3   | 0.926354206                            | N                                            | 0                                      | N                                   |
| CYTH1        | 0.926354206                            | N                                            | 0                                      | N                                   |
| EPB41L4B     | 0.926354206                            | N                                            | 0                                      | N                                   |

| Gene symbols | FDR (differential expression analysis) | Differentially expressed gene? Y, Yes; N, No | Number of insulin related publications | Insulin related gene? Y, Yes; N, No |
|--------------|----------------------------------------|----------------------------------------------|----------------------------------------|-------------------------------------|
| RN7SL65P     | 0.926354206                            | N                                            | 0                                      | N                                   |
| RPAP3        | 0.926354206                            | N                                            | 1                                      | N                                   |
| WDR35        | 0.926354206                            | N                                            | 1                                      | N                                   |
| ZNF443       | 0.926354206                            | N                                            | 0                                      | N                                   |
| SOCS1        | 0.926372843                            | N                                            | 108                                    | Y                                   |
| PODXL        | 0.926382619                            | N                                            | 2                                      | N                                   |
| PARL         | 0.926387316                            | N                                            | 8                                      | N                                   |
| EIF4G1       | 0.926443114                            | N                                            | 6                                      | N                                   |
| MYO9B        | 0.92647259                             | N                                            | 1                                      | N                                   |
| RN7SKP273    | 0.92647259                             | N                                            | 0                                      | N                                   |
| STX16-NPEPL1 | 0.92647259                             | N                                            | 0                                      | N                                   |
| CDH7         | 0.926511941                            | N                                            | 0                                      | N                                   |
| AL513318.1   | 0.926572958                            | N                                            | 0                                      | N                                   |
| CPVL         | 0.926572958                            | N                                            | 1                                      | N                                   |
| LYN          | 0.926572958                            | N                                            | 52                                     | N                                   |
| AL031123.2   | 0.926686297                            | N                                            | 0                                      | N                                   |
| EXOC3        | 0.926686297                            | N                                            | 1                                      | N                                   |
| MMAB         | 0.926686297                            | N                                            | 2                                      | N                                   |
| RAB28        | 0.926686297                            | N                                            | 1                                      | N                                   |
| RBM4         | 0.926686297                            | N                                            | 3                                      | N                                   |
| TPMTP1       | 0.926686297                            | N                                            | 0                                      | N                                   |
| AL513165.1   | 0.926691489                            | N                                            | 0                                      | N                                   |
| PPP4R3B      | 0.926716771                            | N                                            | 0                                      | N                                   |
| RNF113A      | 0.926743965                            | N                                            | 0                                      | N                                   |
| WNK4         | 0.926908146                            | N                                            | 7                                      | N                                   |
| BLVRB        | 0.926970132                            | N                                            | 0                                      | N                                   |
| PHACTR4      | 0.926970132                            | N                                            | 0                                      | N                                   |
| ROCK1        | 0.926970132                            | N                                            | 42                                     | N                                   |
| RTFDC1       | 0.926970132                            | N                                            | 0                                      | N                                   |
| RBM25        | 0.926983832                            | N                                            | 1                                      | N                                   |
| PCGF6        | 0.927030021                            | N                                            | 0                                      | N                                   |
| AC004678.2   | 0.927032224                            | N                                            | 0                                      | N                                   |
| AC018630.6   | 0.927032224                            | N                                            | 0                                      | N                                   |
| AC024619.4   | 0.927032224                            | N                                            | 0                                      | N                                   |
| AC025164.2   | 0.927032224                            | N                                            | 0                                      | N                                   |
| ACADL        | 0.927032224                            | N                                            | 12                                     | N                                   |
| AL360219.1   | 0.927032224                            | N                                            | 0                                      | N                                   |
| AP005899.1   | 0.927032224                            | N                                            | 0                                      | N                                   |
| AP1S1        | 0.927032224                            | N                                            | 0                                      | N                                   |
| ASCC2        | 0.927032224                            | N                                            | 0                                      | N                                   |
| BEND4        | 0.927032224                            | N                                            | 0                                      | N                                   |
| C5orf64      | 0.927032224                            | N                                            | 0                                      | N                                   |
| CD74         | 0.927032224                            | N                                            | 10                                     | N                                   |
| EPB41L3      | 0.927032224                            | N                                            | 1                                      | N                                   |
| INTS14       | 0.927032224                            | N                                            | 0                                      | N                                   |
| KCNRG        | 0.927032224                            | N                                            | 1                                      | N                                   |
| LINC02447    | 0.927032224                            | N                                            | 0                                      | N                                   |
| MCRIP1       | 0.927032224                            | N                                            | 0                                      | N                                   |
| OPCML        | 0.927032224                            | N                                            | 0                                      | N                                   |
| PCOLCE-AS1   | 0.927032224                            | N                                            | 0                                      | N                                   |
| PTTG1IP      | 0.927032224                            | N                                            | 0                                      | N                                   |
| PXDNL        | 0.927032224                            | N                                            | 0                                      | N                                   |
| RETREG1      | 0.927032224                            | N                                            | 0                                      | N                                   |
| TOP1         | 0.927032224                            | N                                            | 3                                      | N                                   |
| TRAF7        | 0.927032224                            | N                                            | 0                                      | N                                   |
| VCPKMT       | 0.927032224                            | N                                            | 0                                      | N                                   |
| ZNF503       | 0.92705069                             | N                                            | 0                                      | N                                   |
| AL080317.3   | 0.927160348                            | N                                            | 0                                      | N                                   |
| PEMT         | 0.927160348                            | N                                            | 53                                     | N                                   |
| AC094103.1   | 0.92717062                             | N                                            | 0                                      | N                                   |
| COMMD8       | 0.927186259                            | N                                            | 0                                      | N                                   |
| NRXN2        | 0.927186259                            | N                                            | 0                                      | N                                   |
| TAF4         | 0.927368051                            | N                                            | 0                                      | N                                   |
| AC089999.3   | 0.927571362                            | N                                            | 0                                      | N                                   |
| SMU1         | 0.927577653                            | N                                            | 0                                      | N                                   |
| PARS2        | 0.927593678                            | N                                            | 0                                      | N                                   |



| Gene symbols | FDR (differential expression analysis) | Differentially expressed gene? Y, Yes; N, No | Number of insulin related publications | Insulin related gene? Y, Yes; N, No |
|--------------|----------------------------------------|----------------------------------------------|----------------------------------------|-------------------------------------|
| TMEM189      | 0.927593678                            | N                                            | 0                                      | N                                   |
| AL022476.1   | 0.927606913                            | N                                            | 0                                      | N                                   |
| COMMD2       | 0.927606913                            | N                                            | 0                                      | N                                   |
| DNAJC15      | 0.927606913                            | N                                            | 2                                      | N                                   |
| FNDC3A       | 0.927606913                            | N                                            | 0                                      | N                                   |
| GLUD1P3      | 0.927606913                            | N                                            | 0                                      | N                                   |
| LCOR         | 0.927606913                            | N                                            | 0                                      | N                                   |
| ONECUT2      | 0.927606913                            | N                                            | 5                                      | N                                   |
| PHGDH        | 0.927606913                            | N                                            | 3                                      | N                                   |
| SARS2        | 0.927606913                            | N                                            | 0                                      | N                                   |
| SOGA3        | 0.927606913                            | N                                            | 0                                      | N                                   |
| ACPI         | 0.927634147                            | N                                            | 26                                     | N                                   |
| KAT14        | 0.927659395                            | N                                            | 0                                      | N                                   |
| EIF4BP7      | 0.927678665                            | N                                            | 0                                      | N                                   |
| GDAP1        | 0.927700779                            | N                                            | 3                                      | N                                   |
| AC127502.2   | 0.927795977                            | N                                            | 0                                      | N                                   |
| AL136370.1   | 0.927795977                            | N                                            | 0                                      | N                                   |
| ATP6AP1L     | 0.927795977                            | N                                            | 0                                      | N                                   |
| DUSP8        | 0.927795977                            | N                                            | 3                                      | N                                   |
| LINC01531    | 0.927795977                            | N                                            | 0                                      | N                                   |
| NBPF20       | 0.927795977                            | N                                            | 0                                      | N                                   |
| PLAC9        | 0.927795977                            | N                                            | 0                                      | N                                   |
| SMARCB1      | 0.927795977                            | N                                            | 6                                      | N                                   |
| AC120114.4   | 0.927911489                            | N                                            | 0                                      | N                                   |
| AC135050.1   | 0.927911489                            | N                                            | 0                                      | N                                   |
| AP001107.1   | 0.927911489                            | N                                            | 0                                      | N                                   |
| ATP13A1      | 0.927911489                            | N                                            | 0                                      | N                                   |
| CNEP1R1      | 0.927911489                            | N                                            | 0                                      | N                                   |
| CRIPT        | 0.927911489                            | N                                            | 0                                      | N                                   |
| NUP133       | 0.927911489                            | N                                            | 0                                      | N                                   |
| RNFT1        | 0.927911489                            | N                                            | 0                                      | N                                   |
| PDGFC        | 0.928035398                            | N                                            | 7                                      | N                                   |
| SLC27A4      | 0.928035398                            | N                                            | 30                                     | N                                   |
| AC096887.2   | 0.928040453                            | N                                            | 0                                      | N                                   |
| THUMPD3P1    | 0.928040453                            | N                                            | 0                                      | N                                   |
| FAM83E       | 0.928063939                            | N                                            | 1                                      | N                                   |
| GVINP1       | 0.928145212                            | N                                            | 0                                      | N                                   |
| PIP5KL1      | 0.928187698                            | N                                            | 0                                      | N                                   |
| AC004889.1   | 0.9281883                              | N                                            | 0                                      | N                                   |
| ITGA3        | 0.9281883                              | N                                            | 2                                      | N                                   |
| TLR2         | 0.9281883                              | N                                            | 169                                    | Y                                   |
| WDR83OS      | 0.9281883                              | N                                            | 0                                      | N                                   |
| Z99289.1     | 0.9281883                              | N                                            | 0                                      | N                                   |
| AC073578.4   | 0.928223838                            | N                                            | 0                                      | N                                   |
| NR4A3        | 0.928251342                            | N                                            | 34                                     | N                                   |
| NRSN2-AS1    | 0.928251342                            | N                                            | 0                                      | N                                   |
| AC004893.1   | 0.928727478                            | N                                            | 0                                      | N                                   |
| SGSM1        | 0.928814357                            | N                                            | 0                                      | N                                   |
| FGFR1OP2     | 0.928828811                            | N                                            | 0                                      | N                                   |
| AC007255.1   | 0.928860998                            | N                                            | 0                                      | N                                   |
| AMER1        | 0.928860998                            | N                                            | 4                                      | N                                   |
| ANO7L1       | 0.928860998                            | N                                            | 0                                      | N                                   |
| DNAJC12      | 0.928860998                            | N                                            | 1                                      | N                                   |
| HPGD         | 0.928860998                            | N                                            | 3                                      | N                                   |
| MTR          | 0.928860998                            | N                                            | 11                                     | N                                   |
| PLPP7        | 0.928860998                            | N                                            | 0                                      | N                                   |
| RTL5         | 0.928860998                            | N                                            | 0                                      | N                                   |
| ZNF541       | 0.928860998                            | N                                            | 0                                      | N                                   |
| AC091060.1   | 0.929022462                            | N                                            | 0                                      | N                                   |
| AC097637.1   | 0.929022462                            | N                                            | 0                                      | N                                   |
| AC105233.3   | 0.929022462                            | N                                            | 0                                      | N                                   |
| AP002472.1   | 0.929022462                            | N                                            | 0                                      | N                                   |
| HGS          | 0.929022462                            | N                                            | 13                                     | N                                   |
| OTX1         | 0.929022462                            | N                                            | 0                                      | N                                   |
| SLCO4C1      | 0.929022462                            | N                                            | 0                                      | N                                   |
| TTC32        | 0.929022462                            | N                                            | 0                                      | N                                   |

| Gene symbols  | FDR (differential expression analysis) | Differentially expressed gene? Y, Yes; N, No | Number of insulin related publications | Insulin related gene? Y, Yes; N, No |
|---------------|----------------------------------------|----------------------------------------------|----------------------------------------|-------------------------------------|
| ZGLP1         | 0.929022462                            | N                                            | 0                                      | N                                   |
| BX571846.1    | 0.929036438                            | N                                            | 0                                      | N                                   |
| AL121749.1    | 0.929094497                            | N                                            | 0                                      | N                                   |
| ANKRD18EP     | 0.929357529                            | N                                            | 0                                      | N                                   |
| CPAMD8        | 0.929498383                            | N                                            | 0                                      | N                                   |
| TGFB1I1       | 0.929498383                            | N                                            | 4                                      | N                                   |
| TNFRSF10A-AS1 | 0.92956102                             | N                                            | 0                                      | N                                   |
| UBXN8         | 0.929617714                            | N                                            | 0                                      | N                                   |
| MIB2          | 0.929658184                            | N                                            | 1                                      | N                                   |
| AL590399.1    | 0.929660544                            | N                                            | 0                                      | N                                   |
| SCAF1         | 0.929698496                            | N                                            | 3                                      | N                                   |
| TBPL1         | 0.929698496                            | N                                            | 0                                      | N                                   |
| AL365203.3    | 0.92974039                             | N                                            | 0                                      | N                                   |
| ATN1          | 0.929744833                            | N                                            | 0                                      | N                                   |
| WDR49         | 0.92984532                             | N                                            | 0                                      | N                                   |
| AP000580.1    | 0.9298914                              | N                                            | 0                                      | N                                   |
| ZFYVE28       | 0.929901435                            | N                                            | 0                                      | N                                   |
| AQP3          | 0.929910113                            | N                                            | 21                                     | N                                   |
| LINC00996     | 0.929910113                            | N                                            | 0                                      | N                                   |
| AL356273.2    | 0.929925873                            | N                                            | 0                                      | N                                   |
| CUL3          | 0.929925873                            | N                                            | 9                                      | N                                   |
| LINC00680     | 0.929925873                            | N                                            | 0                                      | N                                   |
| LINC02280     | 0.929925873                            | N                                            | 0                                      | N                                   |
| MARCKSL1      | 0.929925873                            | N                                            | 0                                      | N                                   |
| MT1G          | 0.929925873                            | N                                            | 1                                      | N                                   |
| MYL12B        | 0.929925873                            | N                                            | 1                                      | N                                   |
| NDUFA5        | 0.929925873                            | N                                            | 3                                      | N                                   |
| PDE4C         | 0.929925873                            | N                                            | 7                                      | N                                   |
| PRDM16        | 0.929925873                            | N                                            | 83                                     | N                                   |
| PRELID3BP10   | 0.929925873                            | N                                            | 0                                      | N                                   |
| PRPF38AP2     | 0.929925873                            | N                                            | 0                                      | N                                   |
| RAMP1         | 0.929925873                            | N                                            | 4                                      | N                                   |
| SIAH3         | 0.929925873                            | N                                            | 0                                      | N                                   |
| TAS2R1        | 0.929925873                            | N                                            | 0                                      | N                                   |
| ZNF775        | 0.929925873                            | N                                            | 0                                      | N                                   |
| HOOK2         | 0.929949882                            | N                                            | 1                                      | N                                   |
| ACRV1         | 0.930085783                            | N                                            | 0                                      | N                                   |
| MFSD1P1       | 0.930085783                            | N                                            | 0                                      | N                                   |
| TNPO1P2       | 0.930095006                            | N                                            | 0                                      | N                                   |
| AP005432.1    | 0.930170925                            | N                                            | 0                                      | N                                   |
| MRPS17P1      | 0.930220952                            | N                                            | 0                                      | N                                   |
| JPH2          | 0.930313815                            | N                                            | 0                                      | N                                   |
| DLX2          | 0.930330532                            | N                                            | 3                                      | N                                   |
| ATP1A3        | 0.930395561                            | N                                            | 1                                      | N                                   |
| CALML3-AS1    | 0.930395561                            | N                                            | 0                                      | N                                   |
| LINC00668     | 0.930395561                            | N                                            | 0                                      | N                                   |
| SAMD9         | 0.930395561                            | N                                            | 0                                      | N                                   |
| AIFM1P1       | 0.930401534                            | N                                            | 0                                      | N                                   |
| SCARNA5       | 0.930401534                            | N                                            | 0                                      | N                                   |
| AC093766.1    | 0.930440713                            | N                                            | 0                                      | N                                   |
| ADPGK         | 0.930519899                            | N                                            | 0                                      | N                                   |
| RN7SL192P     | 0.930519899                            | N                                            | 0                                      | N                                   |
| RPL4P4        | 0.930519899                            | N                                            | 0                                      | N                                   |
| TBC1D15       | 0.930519899                            | N                                            | 1                                      | N                                   |
| WIPI2         | 0.930519899                            | N                                            | 1                                      | N                                   |
| NLRC5         | 0.930549456                            | N                                            | 2                                      | N                                   |
| BDNF          | 0.930697493                            | N                                            | 877                                    | Y                                   |
| AP004245.1    | 0.93070378                             | N                                            | 0                                      | N                                   |
| ABHD13        | 0.930732226                            | N                                            | 0                                      | N                                   |
| AL157402.2    | 0.930732226                            | N                                            | 0                                      | N                                   |
| CCDC97        | 0.930732226                            | N                                            | 0                                      | N                                   |
| COPS7A        | 0.930732226                            | N                                            | 0                                      | N                                   |
| CROCCP2       | 0.930732226                            | N                                            | 0                                      | N                                   |
| EIF3KP1       | 0.930732226                            | N                                            | 0                                      | N                                   |
| EIF5          | 0.930732226                            | N                                            | 2                                      | N                                   |
| FIS1          | 0.930732226                            | N                                            | 22                                     | N                                   |

| Gene symbols  | FDR (differential expression analysis) | Differentially expressed gene? Y, Yes; N, No | Number of insulin related publications | Insulin related gene? Y, Yes; N, No |
|---------------|----------------------------------------|----------------------------------------------|----------------------------------------|-------------------------------------|
| PTPRN2        | 0.930732226                            | N                                            | 48                                     | N                                   |
| RFK           | 0.930732226                            | N                                            | 0                                      | N                                   |
| RORB          | 0.930732226                            | N                                            | 2                                      | N                                   |
| RPS20         | 0.930732226                            | N                                            | 1                                      | N                                   |
| SLC9A1        | 0.930732226                            | N                                            | 15                                     | N                                   |
| WFDC8         | 0.930732226                            | N                                            | 0                                      | N                                   |
| ZNF256        | 0.930732226                            | N                                            | 0                                      | N                                   |
| ZNRF3         | 0.930732226                            | N                                            | 1                                      | N                                   |
| AC068228.1    | 0.930877988                            | N                                            | 0                                      | N                                   |
| AC137723.1    | 0.930877988                            | N                                            | 0                                      | N                                   |
| CH17-340M24.3 | 0.930877988                            | N                                            | 0                                      | N                                   |
| GADD45G       | 0.930877988                            | N                                            | 1                                      | N                                   |
| MOB1A         | 0.930877988                            | N                                            | 0                                      | N                                   |
| AP002414.1    | 0.930931614                            | N                                            | 0                                      | N                                   |
| PDE12         | 0.930931614                            | N                                            | 0                                      | N                                   |
| BAD           | 0.931000557                            | N                                            | 838                                    | Y                                   |
| AL590428.1    | 0.931006322                            | N                                            | 0                                      | N                                   |
| AC005242.1    | 0.931027966                            | N                                            | 0                                      | N                                   |
| ATP5HP2       | 0.931027966                            | N                                            | 0                                      | N                                   |
| PIK3R4        | 0.931027966                            | N                                            | 2                                      | N                                   |
| TANGO6        | 0.931027966                            | N                                            | 0                                      | N                                   |
| COASY         | 0.931099958                            | N                                            | 0                                      | N                                   |
| DIO2          | 0.93110082                             | N                                            | 46                                     | N                                   |
| AL137784.3    | 0.93115335                             | N                                            | 0                                      | N                                   |
| GTPBP4        | 0.93115335                             | N                                            | 0                                      | N                                   |
| PALM3         | 0.93115335                             | N                                            | 0                                      | N                                   |
| SOWAHC        | 0.931292653                            | N                                            | 0                                      | N                                   |
| SPSB2         | 0.931292653                            | N                                            | 0                                      | N                                   |
| AD000864.1    | 0.931318453                            | N                                            | 0                                      | N                                   |
| AP005432.2    | 0.931318453                            | N                                            | 0                                      | N                                   |
| DUSP28        | 0.931318453                            | N                                            | 0                                      | N                                   |
| TSPAN11       | 0.931318453                            | N                                            | 0                                      | N                                   |
| HOMER2P1      | 0.931346461                            | N                                            | 0                                      | N                                   |
| AC025171.1    | 0.931351421                            | N                                            | 0                                      | N                                   |
| RAD23A        | 0.931351421                            | N                                            | 1                                      | N                                   |
| AC025884.2    | 0.931364011                            | N                                            | 0                                      | N                                   |
| AC037459.1    | 0.931387967                            | N                                            | 0                                      | N                                   |
| AC074085.2    | 0.931387967                            | N                                            | 0                                      | N                                   |
| AKNA          | 0.931387967                            | N                                            | 0                                      | N                                   |
| AL021068.1    | 0.931387967                            | N                                            | 0                                      | N                                   |
| CA12          | 0.931387967                            | N                                            | 0                                      | N                                   |
| EBF4          | 0.931387967                            | N                                            | 0                                      | N                                   |
| MYOSLID       | 0.931387967                            | N                                            | 0                                      | N                                   |
| PTGDR         | 0.931387967                            | N                                            | 0                                      | N                                   |
| SV2A          | 0.931387967                            | N                                            | 2                                      | N                                   |
| TMEM205       | 0.931387967                            | N                                            | 0                                      | N                                   |
| VASP          | 0.931387967                            | N                                            | 23                                     | N                                   |
| CLDN16        | 0.931440137                            | N                                            | 0                                      | N                                   |
| PENK          | 0.931440137                            | N                                            | 2                                      | N                                   |
| FUT11         | 0.931475751                            | N                                            | 0                                      | N                                   |
| ELMOD2        | 0.931515927                            | N                                            | 0                                      | N                                   |
| FOXC2-AS1     | 0.931515927                            | N                                            | 0                                      | N                                   |
| MGRN1         | 0.931515927                            | N                                            | 2                                      | N                                   |
| TXLNG         | 0.931515927                            | N                                            | 1                                      | N                                   |
| CR1           | 0.93156093                             | N                                            | 20                                     | N                                   |
| DMTN          | 0.93156093                             | N                                            | 0                                      | N                                   |
| DNAJC24       | 0.93156093                             | N                                            | 1                                      | N                                   |
| WDR59         | 0.93156093                             | N                                            | 0                                      | N                                   |
| AC007383.1    | 0.931616529                            | N                                            | 0                                      | N                                   |
| AC058791.1    | 0.931616529                            | N                                            | 0                                      | N                                   |
| AMOT          | 0.931616529                            | N                                            | 2                                      | N                                   |
| LINC01535     | 0.931616529                            | N                                            | 0                                      | N                                   |
| AC027796.4    | 0.931640079                            | N                                            | 0                                      | N                                   |
| AC073072.1    | 0.931965882                            | N                                            | 0                                      | N                                   |
| AC007346.2    | 0.932015497                            | N                                            | 0                                      | N                                   |
| AC018682.1    | 0.932015497                            | N                                            | 0                                      | N                                   |

| Gene symbols | FDR (differential expression analysis) | Differentially expressed gene? Y, Yes; N, No | Number of insulin related publications | Insulin related gene? Y, Yes; N, No |
|--------------|----------------------------------------|----------------------------------------------|----------------------------------------|-------------------------------------|
| AC138207.2   | 0.932015497                            | N                                            | 0                                      | N                                   |
| AL034379.1   | 0.932015497                            | N                                            | 0                                      | N                                   |
| AL450384.2   | 0.932015497                            | N                                            | 0                                      | N                                   |
| BMS1P4       | 0.932015497                            | N                                            | 0                                      | N                                   |
| ERC2         | 0.932015497                            | N                                            | 3                                      | N                                   |
| FAM153B      | 0.932015497                            | N                                            | 0                                      | N                                   |
| FAR1         | 0.932015497                            | N                                            | 0                                      | N                                   |
| GCAT         | 0.932015497                            | N                                            | 1                                      | N                                   |
| GPX4         | 0.932015497                            | N                                            | 16                                     | N                                   |
| MFGES        | 0.932015497                            | N                                            | 10                                     | N                                   |
| PGK1P2       | 0.932015497                            | N                                            | 0                                      | N                                   |
| PICK1        | 0.932015497                            | N                                            | 9                                      | N                                   |
| SHANK3       | 0.932015497                            | N                                            | 9                                      | N                                   |
| SLC30A8      | 0.932015497                            | N                                            | 275                                    | Y                                   |
| SMARCAL1     | 0.932015497                            | N                                            | 0                                      | N                                   |
| TLEIP1       | 0.932015497                            | N                                            | 0                                      | N                                   |
| TMEM59L      | 0.932015497                            | N                                            | 1                                      | N                                   |
| UBE2FP1      | 0.932015497                            | N                                            | 0                                      | N                                   |
| ZBTB38       | 0.932015497                            | N                                            | 2                                      | N                                   |
| ZNF446       | 0.932015497                            | N                                            | 0                                      | N                                   |
| ZNF669       | 0.932015497                            | N                                            | 0                                      | N                                   |
| NCKIPSD      | 0.932055801                            | N                                            | 0                                      | N                                   |
| EIF4E2P1     | 0.932089777                            | N                                            | 0                                      | N                                   |
| NUDT2        | 0.932179627                            | N                                            | 1                                      | N                                   |
| RAB3GAP2     | 0.932179627                            | N                                            | 0                                      | N                                   |
| AP000911.3   | 0.932257225                            | N                                            | 0                                      | N                                   |
| ARMC8P1      | 0.932257225                            | N                                            | 0                                      | N                                   |
| CDC34        | 0.932257225                            | N                                            | 2                                      | N                                   |
| HMGCR        | 0.932257225                            | N                                            | 67                                     | N                                   |
| NOL4L        | 0.932257225                            | N                                            | 0                                      | N                                   |
| ZNF131       | 0.932257225                            | N                                            | 0                                      | N                                   |
| ZNF837       | 0.932257225                            | N                                            | 0                                      | N                                   |
| ERP29P1      | 0.932271107                            | N                                            | 0                                      | N                                   |
| GABRB2       | 0.932327771                            | N                                            | 0                                      | N                                   |
| EGR1         | 0.93235345                             | N                                            | 141                                    | Y                                   |
| IRF4         | 0.93235345                             | N                                            | 12                                     | N                                   |
| ZNF823       | 0.93235345                             | N                                            | 0                                      | N                                   |
| ZEB2         | 0.932409804                            | N                                            | 9                                      | N                                   |
| HIPK1        | 0.932419177                            | N                                            | 0                                      | N                                   |
| EIF3A        | 0.932429743                            | N                                            | 2                                      | N                                   |
| AL117348.2   | 0.932545127                            | N                                            | 0                                      | N                                   |
| AC105339.1   | 0.932560366                            | N                                            | 0                                      | N                                   |
| OGDH         | 0.932560366                            | N                                            | 5                                      | N                                   |
| AC004076.2   | 0.932574239                            | N                                            | 0                                      | N                                   |
| CCDC150P1    | 0.932651479                            | N                                            | 0                                      | N                                   |
| RAX          | 0.932651479                            | N                                            | 3                                      | N                                   |
| RPL10P16     | 0.932651479                            | N                                            | 0                                      | N                                   |
| AC007159.1   | 0.932805833                            | N                                            | 0                                      | N                                   |
| KIF7         | 0.932805833                            | N                                            | 0                                      | N                                   |
| ORC4         | 0.932805833                            | N                                            | 0                                      | N                                   |
| AL358975.1   | 0.932923987                            | N                                            | 0                                      | N                                   |
| AC015967.1   | 0.932973114                            | N                                            | 0                                      | N                                   |
| AC113191.1   | 0.932973114                            | N                                            | 0                                      | N                                   |
| USP17L7      | 0.932973114                            | N                                            | 0                                      | N                                   |
| AL391419.1   | 0.932975621                            | N                                            | 0                                      | N                                   |
| ARHGAP4      | 0.932990531                            | N                                            | 0                                      | N                                   |
| LINC00643    | 0.932990531                            | N                                            | 0                                      | N                                   |
| LINC02021    | 0.932990531                            | N                                            | 0                                      | N                                   |
| PUM2         | 0.932990531                            | N                                            | 0                                      | N                                   |
| UROD         | 0.932990531                            | N                                            | 0                                      | N                                   |
| RAD17P1      | 0.93306322                             | N                                            | 0                                      | N                                   |
| 7SK          | 0.933110367                            | N                                            | 1                                      | N                                   |
| AL441883.1   | 0.933112012                            | N                                            | 0                                      | N                                   |
| KDM5D        | 0.933112012                            | N                                            | 0                                      | N                                   |
| AC010522.1   | 0.933132758                            | N                                            | 0                                      | N                                   |
| AC012464.3   | 0.933132758                            | N                                            | 0                                      | N                                   |

| Gene symbols | FDR (differential expression analysis) | Differentially expressed gene? Y, Yes; N, No | Number of insulin related publications | Insulin related gene? Y, Yes; N, No |
|--------------|----------------------------------------|----------------------------------------------|----------------------------------------|-------------------------------------|
| AC091874.1   | 0.933132758                            | N                                            | 0                                      | N                                   |
| AC093677.1   | 0.933132758                            | N                                            | 0                                      | N                                   |
| AC112721.2   | 0.933132758                            | N                                            | 0                                      | N                                   |
| AC233982.1   | 0.933132758                            | N                                            | 0                                      | N                                   |
| CARM1        | 0.933132758                            | N                                            | 4                                      | N                                   |
| MORC4        | 0.933132758                            | N                                            | 0                                      | N                                   |
| MYCL         | 0.933132758                            | N                                            | 7                                      | N                                   |
| PCTP         | 0.933132758                            | N                                            | 10                                     | N                                   |
| PRDM5        | 0.933132758                            | N                                            | 1                                      | N                                   |
| RPL5P23      | 0.933132758                            | N                                            | 0                                      | N                                   |
| RPL5P34      | 0.933132758                            | N                                            | 0                                      | N                                   |
| SGK494       | 0.933132758                            | N                                            | 0                                      | N                                   |
| STARD4-AS1   | 0.933132758                            | N                                            | 0                                      | N                                   |
| TMTC2        | 0.933132758                            | N                                            | 0                                      | N                                   |
| DGAT2        | 0.933205406                            | N                                            | 73                                     | N                                   |
| OSBPL9P4     | 0.933205406                            | N                                            | 0                                      | N                                   |
| AC007552.1   | 0.933212134                            | N                                            | 0                                      | N                                   |
| CAST         | 0.933214535                            | N                                            | 136                                    | Y                                   |
| AC091231.1   | 0.933235759                            | N                                            | 0                                      | N                                   |
| AC004951.1   | 0.933328203                            | N                                            | 0                                      | N                                   |
| CYHR1        | 0.933328203                            | N                                            | 0                                      | N                                   |
| TTC19        | 0.933328203                            | N                                            | 0                                      | N                                   |
| PSMA2P1      | 0.933394945                            | N                                            | 0                                      | N                                   |
| AC091492.1   | 0.933420009                            | N                                            | 0                                      | N                                   |
| ICE2         | 0.933420009                            | N                                            | 0                                      | N                                   |
| CHCHD2P9     | 0.933556816                            | N                                            | 0                                      | N                                   |
| CERNA1       | 0.933675721                            | N                                            | 0                                      | N                                   |
| AC005726.4   | 0.933711025                            | N                                            | 0                                      | N                                   |
| AK9          | 0.933711025                            | N                                            | 0                                      | N                                   |
| LINC01287    | 0.933711025                            | N                                            | 0                                      | N                                   |
| LINC02394    | 0.933711025                            | N                                            | 0                                      | N                                   |
| SEM1         | 0.933711025                            | N                                            | 1                                      | N                                   |
| SLC8A1-AS1   | 0.933711025                            | N                                            | 0                                      | N                                   |
| SPSB1        | 0.933711025                            | N                                            | 0                                      | N                                   |
| TAS2R30      | 0.933711025                            | N                                            | 0                                      | N                                   |
| THAP12       | 0.933711025                            | N                                            | 0                                      | N                                   |
| ULBP2        | 0.933711025                            | N                                            | 1                                      | N                                   |
| AL445238.1   | 0.933935939                            | N                                            | 0                                      | N                                   |
| ENOX2        | 0.93395353                             | N                                            | 1                                      | N                                   |
| SRGN         | 0.93395353                             | N                                            | 0                                      | N                                   |
| AL109918.1   | 0.934063103                            | N                                            | 0                                      | N                                   |
| BRK1         | 0.934063103                            | N                                            | 0                                      | N                                   |
| CAD          | 0.934063103                            | N                                            | 1000                                   | Y                                   |
| EPB41L4A-AS1 | 0.934063103                            | N                                            | 0                                      | N                                   |
| NDUFAF2      | 0.934063103                            | N                                            | 1                                      | N                                   |
| ANGPTL2      | 0.934095251                            | N                                            | 20                                     | N                                   |
| AC133473.1   | 0.934150213                            | N                                            | 0                                      | N                                   |
| COL6A6       | 0.934150213                            | N                                            | 0                                      | N                                   |
| CADPS2       | 0.934172873                            | N                                            | 0                                      | N                                   |
| TWF1         | 0.934172873                            | N                                            | 1                                      | N                                   |
| AC068042.1   | 0.934197602                            | N                                            | 0                                      | N                                   |
| AC018630.1   | 0.934225119                            | N                                            | 0                                      | N                                   |
| AC009090.1   | 0.934348543                            | N                                            | 0                                      | N                                   |
| AC034236.2   | 0.934348543                            | N                                            | 0                                      | N                                   |
| PSME3        | 0.934348543                            | N                                            | 3                                      | N                                   |
| AC073842.2   | 0.934511216                            | N                                            | 0                                      | N                                   |
| AKR1C2       | 0.934511216                            | N                                            | 4                                      | N                                   |
| AKT1S1       | 0.934511216                            | N                                            | 29                                     | N                                   |
| AL162426.1   | 0.934511216                            | N                                            | 0                                      | N                                   |
| BHLHE40-AS1  | 0.934511216                            | N                                            | 0                                      | N                                   |
| CYCSP12      | 0.934511216                            | N                                            | 0                                      | N                                   |
| IDNK         | 0.934511216                            | N                                            | 0                                      | N                                   |
| AACS         | 0.934577949                            | N                                            | 5                                      | N                                   |
| BDKRB2       | 0.934577949                            | N                                            | 4                                      | N                                   |
| MBNL1-AS1    | 0.934577949                            | N                                            | 0                                      | N                                   |
| TRPC5        | 0.934577949                            | N                                            | 11                                     | N                                   |

| Gene symbols | FDR (differential expression analysis) | Differentially expressed gene? Y, Yes; N, No | Number of insulin related publications | Insulin related gene? Y, Yes; N, No |
|--------------|----------------------------------------|----------------------------------------------|----------------------------------------|-------------------------------------|
| ABCC10       | 0.934608577                            | N                                            | 1                                      | N                                   |
| AC009509.4   | 0.934608577                            | N                                            | 0                                      | N                                   |
| AC010099.3   | 0.934608577                            | N                                            | 0                                      | N                                   |
| AC023830.2   | 0.934608577                            | N                                            | 0                                      | N                                   |
| AC069079.1   | 0.934608577                            | N                                            | 0                                      | N                                   |
| AC090425.2   | 0.934608577                            | N                                            | 0                                      | N                                   |
| AD000091.1   | 0.934608577                            | N                                            | 0                                      | N                                   |
| AL031710.2   | 0.934608577                            | N                                            | 0                                      | N                                   |
| AL671855.1   | 0.934608577                            | N                                            | 0                                      | N                                   |
| BNIP3P1      | 0.934608577                            | N                                            | 0                                      | N                                   |
| IL12A        | 0.934608577                            | N                                            | 4                                      | N                                   |
| LAMTOR4      | 0.934608577                            | N                                            | 0                                      | N                                   |
| NAGPA        | 0.934608577                            | N                                            | 0                                      | N                                   |
| PLEKHN1      | 0.934608577                            | N                                            | 1                                      | N                                   |
| RASSF8       | 0.934608577                            | N                                            | 1                                      | N                                   |
| AC093525.2   | 0.934679414                            | N                                            | 0                                      | N                                   |
| SQOR         | 0.934679414                            | N                                            | 0                                      | N                                   |
| CASP7        | 0.934737931                            | N                                            | 58                                     | N                                   |
| DDX50P2      | 0.934737931                            | N                                            | 0                                      | N                                   |
| NXF3         | 0.93475066                             | N                                            | 0                                      | N                                   |
| AC139887.4   | 0.934803524                            | N                                            | 0                                      | N                                   |
| AC023538.1   | 0.935002236                            | N                                            | 0                                      | N                                   |
| AC125603.4   | 0.935002236                            | N                                            | 0                                      | N                                   |
| AGXT         | 0.935002236                            | N                                            | 2                                      | N                                   |
| B3GALT6      | 0.935002236                            | N                                            | 0                                      | N                                   |
| C12orf75     | 0.935002236                            | N                                            | 0                                      | N                                   |
| DUOX1        | 0.935002236                            | N                                            | 14                                     | N                                   |
| FMN2         | 0.935002236                            | N                                            | 0                                      | N                                   |
| GAS6-AS1     | 0.935002236                            | N                                            | 0                                      | N                                   |
| HSP90AB7P    | 0.935002236                            | N                                            | 0                                      | N                                   |
| MAGI1-IT1    | 0.935002236                            | N                                            | 0                                      | N                                   |
| METTL9       | 0.935002236                            | N                                            | 0                                      | N                                   |
| MRPS21P6     | 0.935002236                            | N                                            | 0                                      | N                                   |
| RPS15AP12    | 0.935002236                            | N                                            | 0                                      | N                                   |
| SLC25A20P1   | 0.935002236                            | N                                            | 0                                      | N                                   |
| SORCS3       | 0.935002236                            | N                                            | 1                                      | N                                   |
| ST3GAL1P1    | 0.935002236                            | N                                            | 0                                      | N                                   |
| TMEM241      | 0.935002236                            | N                                            | 0                                      | N                                   |
| WDR20        | 0.935002236                            | N                                            | 0                                      | N                                   |
| WSB2         | 0.935002236                            | N                                            | 2                                      | N                                   |
| XAGE2        | 0.935002236                            | N                                            | 0                                      | N                                   |
| GOLT1A       | 0.93504712                             | N                                            | 0                                      | N                                   |
| LINC00920    | 0.935121663                            | N                                            | 0                                      | N                                   |
| PPP4R3A      | 0.935121663                            | N                                            | 0                                      | N                                   |
| REPS2        | 0.935121663                            | N                                            | 3                                      | N                                   |
| SLC2A4       | 0.935121663                            | N                                            | 1000                                   | Y                                   |
| STK17A       | 0.935121663                            | N                                            | 0                                      | N                                   |
| SEC22A       | 0.935159544                            | N                                            | 1                                      | N                                   |
| AL022722.1   | 0.935430936                            | N                                            | 0                                      | N                                   |
| BX248409.1   | 0.935430936                            | N                                            | 0                                      | N                                   |
| AL136984.1   | 0.935554266                            | N                                            | 0                                      | N                                   |
| ALMS1-IT1    | 0.935554266                            | N                                            | 0                                      | N                                   |
| ATP5A1       | 0.935554266                            | N                                            | 5                                      | N                                   |
| CICP18       | 0.935554266                            | N                                            | 0                                      | N                                   |
| ERAP2        | 0.935554266                            | N                                            | 11                                     | N                                   |
| NEXN         | 0.935554266                            | N                                            | 0                                      | N                                   |
| RPS3P2       | 0.935554266                            | N                                            | 0                                      | N                                   |
| SSC4D        | 0.935554266                            | N                                            | 0                                      | N                                   |
| THEMIS       | 0.935554266                            | N                                            | 1                                      | N                                   |
| VSNL1        | 0.935554266                            | N                                            | 1                                      | N                                   |
| ZFP36L2      | 0.935554266                            | N                                            | 3                                      | N                                   |
| AC079777.1   | 0.935583598                            | N                                            | 0                                      | N                                   |
| SOX5         | 0.935583598                            | N                                            | 6                                      | N                                   |
| C9orf47      | 0.935723047                            | N                                            | 0                                      | N                                   |
| CYP27B1      | 0.935723047                            | N                                            | 50                                     | N                                   |
| PFKM         | 0.935723047                            | N                                            | 10                                     | N                                   |

| Gene symbols | FDR (differential expression analysis) | Differentially expressed gene? Y, Yes; N, No | Number of insulin related publications | Insulin related gene? Y, Yes; N, No |
|--------------|----------------------------------------|----------------------------------------------|----------------------------------------|-------------------------------------|
| SLFN11       | 0.935723047                            | N                                            | 0                                      | N                                   |
| ZNF75A       | 0.935723047                            | N                                            | 0                                      | N                                   |
| ANKRD37      | 0.935849899                            | N                                            | 0                                      | N                                   |
| LMTK3        | 0.935849899                            | N                                            | 0                                      | N                                   |
| AL589843.2   | 0.935857657                            | N                                            | 0                                      | N                                   |
| LINC02199    | 0.935857657                            | N                                            | 0                                      | N                                   |
| CFAP53       | 0.936105532                            | N                                            | 0                                      | N                                   |
| FAM107A      | 0.936105532                            | N                                            | 2                                      | N                                   |
| NHLRC1       | 0.936105532                            | N                                            | 2                                      | N                                   |
| SEMA4F       | 0.936105532                            | N                                            | 0                                      | N                                   |
| SLC35E1P1    | 0.936105532                            | N                                            | 0                                      | N                                   |
| SLFN12       | 0.936105532                            | N                                            | 0                                      | N                                   |
| AC004801.6   | 0.936136677                            | N                                            | 0                                      | N                                   |
| ZBTB22       | 0.936136677                            | N                                            | 0                                      | N                                   |
| CDC20B       | 0.936286545                            | N                                            | 1                                      | N                                   |
| IL33         | 0.936286545                            | N                                            | 35                                     | N                                   |
| RGCC         | 0.936286545                            | N                                            | 3                                      | N                                   |
| ZNF528-AS1   | 0.936286545                            | N                                            | 0                                      | N                                   |
| PLCXD3       | 0.936319052                            | N                                            | 2                                      | N                                   |
| AC091078.1   | 0.936350311                            | N                                            | 0                                      | N                                   |
| ALG3         | 0.936350311                            | N                                            | 0                                      | N                                   |
| PCSK7        | 0.936350311                            | N                                            | 4                                      | N                                   |
| SLC25A51     | 0.936350311                            | N                                            | 0                                      | N                                   |
| SUSD2        | 0.936520084                            | N                                            | 1                                      | N                                   |
| DLG1         | 0.936541368                            | N                                            | 6                                      | N                                   |
| KIF19        | 0.936606756                            | N                                            | 0                                      | N                                   |
| AC112694.1   | 0.936796393                            | N                                            | 0                                      | N                                   |
| AL135903.1   | 0.936796393                            | N                                            | 0                                      | N                                   |
| ARHGEF19     | 0.936796393                            | N                                            | 2                                      | N                                   |
| ELOVL6       | 0.936796393                            | N                                            | 44                                     | N                                   |
| GADD45B      | 0.936796393                            | N                                            | 7                                      | N                                   |
| LINC00243    | 0.936796393                            | N                                            | 0                                      | N                                   |
| PTCH2        | 0.936796393                            | N                                            | 0                                      | N                                   |
| RNPEP        | 0.936796393                            | N                                            | 0                                      | N                                   |
| SLC26A6      | 0.936796393                            | N                                            | 4                                      | N                                   |
| TNFRSF11A    | 0.936796393                            | N                                            | 24                                     | N                                   |
| AC067940.1   | 0.936841057                            | N                                            | 0                                      | N                                   |
| AC020763.2   | 0.937138154                            | N                                            | 0                                      | N                                   |
| FNBP1        | 0.937138154                            | N                                            | 0                                      | N                                   |
| FRMD8P1      | 0.9371419                              | N                                            | 0                                      | N                                   |
| HMG1P24      | 0.9371419                              | N                                            | 0                                      | N                                   |
| TMSB4XP4     | 0.9371419                              | N                                            | 0                                      | N                                   |
| AC025171.2   | 0.937161839                            | N                                            | 0                                      | N                                   |
| DGUOK        | 0.937345894                            | N                                            | 0                                      | N                                   |
| EIF4A1P10    | 0.937345894                            | N                                            | 0                                      | N                                   |
| LINC01965    | 0.937345894                            | N                                            | 0                                      | N                                   |
| NAT10        | 0.937345894                            | N                                            | 0                                      | N                                   |
| INPP5F       | 0.93737211                             | N                                            | 1                                      | N                                   |
| AC007663.2   | 0.937538759                            | N                                            | 0                                      | N                                   |
| AC005520.3   | 0.937576383                            | N                                            | 0                                      | N                                   |
| AC022558.1   | 0.937576383                            | N                                            | 0                                      | N                                   |
| AC026348.1   | 0.937576383                            | N                                            | 0                                      | N                                   |
| AC093698.2   | 0.937576383                            | N                                            | 0                                      | N                                   |
| AC138207.4   | 0.937576383                            | N                                            | 0                                      | N                                   |
| ACVR2B       | 0.937576383                            | N                                            | 7                                      | N                                   |
| ADIPOQ       | 0.937576383                            | N                                            | 1000                                   | Y                                   |
| AF127577.6   | 0.937576383                            | N                                            | 0                                      | N                                   |
| AIDA         | 0.937576383                            | N                                            | 80                                     | N                                   |
| AL512662.1   | 0.937576383                            | N                                            | 0                                      | N                                   |
| AL590552.1   | 0.937576383                            | N                                            | 0                                      | N                                   |
| ALX4         | 0.937576383                            | N                                            | 4                                      | N                                   |
| CCNC         | 0.937576383                            | N                                            | 3                                      | N                                   |
| CDK14        | 0.937576383                            | N                                            | 0                                      | N                                   |
| FAM155A      | 0.937576383                            | N                                            | 0                                      | N                                   |
| FXNP2        | 0.937576383                            | N                                            | 0                                      | N                                   |
| FZD6         | 0.937576383                            | N                                            | 2                                      | N                                   |

| Gene symbols | FDR (differential expression analysis) | Differentially expressed gene? Y, Yes; N, No | Number of insulin related publications | Insulin related gene? Y, Yes; N, No |
|--------------|----------------------------------------|----------------------------------------------|----------------------------------------|-------------------------------------|
| GAL3ST1      | 0.937576383                            | N                                            | 0                                      | N                                   |
| GTF2A1       | 0.937576383                            | N                                            | 0                                      | N                                   |
| HADHA        | 0.937576383                            | N                                            | 6                                      | N                                   |
| IL18         | 0.937576383                            | N                                            | 227                                    | Y                                   |
| IL18BP       | 0.937576383                            | N                                            | 1                                      | N                                   |
| IQUB         | 0.937576383                            | N                                            | 0                                      | N                                   |
| LINC01137    | 0.937576383                            | N                                            | 0                                      | N                                   |
| LINC02253    | 0.937576383                            | N                                            | 0                                      | N                                   |
| MSANTD2P1    | 0.937576383                            | N                                            | 0                                      | N                                   |
| PCDH8        | 0.937576383                            | N                                            | 0                                      | N                                   |
| PIP          | 0.937576383                            | N                                            | 513                                    | Y                                   |
| RASL12       | 0.937576383                            | N                                            | 1                                      | N                                   |
| RBM41        | 0.937576383                            | N                                            | 0                                      | N                                   |
| RPL7P13      | 0.937576383                            | N                                            | 0                                      | N                                   |
| SLC25A18     | 0.937576383                            | N                                            | 0                                      | N                                   |
| STPG3-AS1    | 0.937576383                            | N                                            | 0                                      | N                                   |
| STRIP1       | 0.937576383                            | N                                            | 2                                      | N                                   |
| SUPT4H1      | 0.937576383                            | N                                            | 0                                      | N                                   |
| TAF1C        | 0.937576383                            | N                                            | 0                                      | N                                   |
| TCF20        | 0.937576383                            | N                                            | 0                                      | N                                   |
| TMEM262      | 0.937576383                            | N                                            | 0                                      | N                                   |
| UPF1         | 0.937576383                            | N                                            | 4                                      | N                                   |
| AC010970.1   | 0.937586189                            | N                                            | 0                                      | N                                   |
| AC078927.1   | 0.937586189                            | N                                            | 0                                      | N                                   |
| AC079140.2   | 0.937586189                            | N                                            | 0                                      | N                                   |
| AC087752.4   | 0.937586189                            | N                                            | 0                                      | N                                   |
| AC097641.3   | 0.937586189                            | N                                            | 0                                      | N                                   |
| AC109454.2   | 0.937586189                            | N                                            | 0                                      | N                                   |
| AC109992.2   | 0.937586189                            | N                                            | 0                                      | N                                   |
| ADRA2B       | 0.937586189                            | N                                            | 10                                     | N                                   |
| AL096817.1   | 0.937586189                            | N                                            | 0                                      | N                                   |
| AL122035.2   | 0.937586189                            | N                                            | 0                                      | N                                   |
| AL139288.1   | 0.937586189                            | N                                            | 0                                      | N                                   |
| AL354798.1   | 0.937586189                            | N                                            | 0                                      | N                                   |
| CPT1C        | 0.937586189                            | N                                            | 8                                      | N                                   |
| CTBP2        | 0.937586189                            | N                                            | 3                                      | N                                   |
| DACT2        | 0.937586189                            | N                                            | 0                                      | N                                   |
| DCHS1        | 0.937586189                            | N                                            | 0                                      | N                                   |
| DGKD         | 0.937586189                            | N                                            | 3                                      | N                                   |
| FAAP20       | 0.937586189                            | N                                            | 0                                      | N                                   |
| FMOD         | 0.937586189                            | N                                            | 8                                      | N                                   |
| GPR160       | 0.937586189                            | N                                            | 1                                      | N                                   |
| KRT18P5      | 0.937586189                            | N                                            | 0                                      | N                                   |
| LAGE3        | 0.937586189                            | N                                            | 1                                      | N                                   |
| LINC01116    | 0.937586189                            | N                                            | 0                                      | N                                   |
| LONRF2       | 0.937586189                            | N                                            | 1                                      | N                                   |
| MED24        | 0.937586189                            | N                                            | 0                                      | N                                   |
| MTND4P16     | 0.937586189                            | N                                            | 0                                      | N                                   |
| PATE4        | 0.937586189                            | N                                            | 0                                      | N                                   |
| PDCD10       | 0.937586189                            | N                                            | 0                                      | N                                   |
| PDSS2        | 0.937586189                            | N                                            | 0                                      | N                                   |
| POLR3E       | 0.937586189                            | N                                            | 0                                      | N                                   |
| PPP2R3C      | 0.937586189                            | N                                            | 1                                      | N                                   |
| PREX1        | 0.937586189                            | N                                            | 6                                      | N                                   |
| SEC14L1      | 0.937586189                            | N                                            | 1                                      | N                                   |
| SEC23B       | 0.937586189                            | N                                            | 1                                      | N                                   |
| SGSM3        | 0.937586189                            | N                                            | 0                                      | N                                   |
| SMARCD2      | 0.937586189                            | N                                            | 0                                      | N                                   |
| SMPD2        | 0.937586189                            | N                                            | 0                                      | N                                   |
| SNPH         | 0.937586189                            | N                                            | 0                                      | N                                   |
| STK32C       | 0.937586189                            | N                                            | 0                                      | N                                   |
| TACC2        | 0.937586189                            | N                                            | 0                                      | N                                   |
| TAL1         | 0.937586189                            | N                                            | 6                                      | N                                   |
| Z95115.1     | 0.937586189                            | N                                            | 0                                      | N                                   |
| ZC3H15       | 0.937586189                            | N                                            | 0                                      | N                                   |
| AC124319.2   | 0.937599548                            | N                                            | 0                                      | N                                   |



| Gene symbols | FDR (differential expression analysis) | Differentially expressed gene? Y, Yes; N, No | Number of insulin related publications | Insulin related gene? Y, Yes; N, No |
|--------------|----------------------------------------|----------------------------------------------|----------------------------------------|-------------------------------------|
| AL162311.3   | 0.937599548                            | N                                            | 0                                      | N                                   |
| AL359715.2   | 0.937599548                            | N                                            | 0                                      | N                                   |
| TNRC18       | 0.937599548                            | N                                            | 0                                      | N                                   |
| AAGAB        | 0.93762126                             | N                                            | 0                                      | N                                   |
| RWDD4        | 0.93762126                             | N                                            | 0                                      | N                                   |
| GREM2        | 0.937632406                            | N                                            | 1                                      | N                                   |
| RPS25        | 0.937632406                            | N                                            | 1                                      | N                                   |
| HMGA2        | 0.937819631                            | N                                            | 32                                     | N                                   |
| AC007547.1   | 0.93783809                             | N                                            | 0                                      | N                                   |
| AC009318.3   | 0.938061454                            | N                                            | 0                                      | N                                   |
| ACTG1P17     | 0.938061454                            | N                                            | 0                                      | N                                   |
| AMIGO2       | 0.938061454                            | N                                            | 0                                      | N                                   |
| BMP4         | 0.938061454                            | N                                            | 114                                    | Y                                   |
| C1orf61      | 0.938061454                            | N                                            | 0                                      | N                                   |
| ISOC2        | 0.938061454                            | N                                            | 0                                      | N                                   |
| MDH1B        | 0.938061454                            | N                                            | 0                                      | N                                   |
| TAS2R13      | 0.938061454                            | N                                            | 0                                      | N                                   |
| TFAP2C       | 0.938061454                            | N                                            | 67                                     | N                                   |
| C17orf80     | 0.938097062                            | N                                            | 0                                      | N                                   |
| NINJ1        | 0.938192412                            | N                                            | 2                                      | N                                   |
| PCIF1        | 0.938192412                            | N                                            | 3                                      | N                                   |
| AP001350.1   | 0.938321714                            | N                                            | 0                                      | N                                   |
| PRPS1L1      | 0.938338385                            | N                                            | 0                                      | N                                   |
| CPED1        | 0.938392413                            | N                                            | 0                                      | N                                   |
| EXOC1        | 0.938392413                            | N                                            | 1                                      | N                                   |
| SPPL2B       | 0.938392413                            | N                                            | 0                                      | N                                   |
| XKR7         | 0.938392413                            | N                                            | 0                                      | N                                   |
| KRT18        | 0.938393491                            | N                                            | 11                                     | N                                   |
| AC006530.1   | 0.93841901                             | N                                            | 0                                      | N                                   |
| AC022497.1   | 0.93841901                             | N                                            | 0                                      | N                                   |
| ATP5G2P1     | 0.93841901                             | N                                            | 0                                      | N                                   |
| MILR1        | 0.93841901                             | N                                            | 0                                      | N                                   |
| SLC4A10      | 0.93841901                             | N                                            | 0                                      | N                                   |
| SPECC1       | 0.93841901                             | N                                            | 0                                      | N                                   |
| AC015813.1   | 0.938520407                            | N                                            | 0                                      | N                                   |
| AC069148.1   | 0.938520407                            | N                                            | 0                                      | N                                   |
| C1orf53      | 0.938520407                            | N                                            | 0                                      | N                                   |
| CALHM2       | 0.938520407                            | N                                            | 0                                      | N                                   |
| DCBLD1       | 0.938520407                            | N                                            | 0                                      | N                                   |
| HNRNPA1P48   | 0.938520407                            | N                                            | 0                                      | N                                   |
| SMARCD1      | 0.938520407                            | N                                            | 1                                      | N                                   |
| WDFY1        | 0.938520407                            | N                                            | 0                                      | N                                   |
| AC004461.2   | 0.938546507                            | N                                            | 0                                      | N                                   |
| AC024884.2   | 0.938546507                            | N                                            | 0                                      | N                                   |
| AC084855.2   | 0.938546507                            | N                                            | 0                                      | N                                   |
| RAB21        | 0.938546507                            | N                                            | 1                                      | N                                   |
| SH3TC1       | 0.938546507                            | N                                            | 0                                      | N                                   |
| SPON1        | 0.938546507                            | N                                            | 0                                      | N                                   |
| SRD5A3P1     | 0.938546507                            | N                                            | 0                                      | N                                   |
| SUMO1P3      | 0.938546507                            | N                                            | 0                                      | N                                   |
| TCP11L1      | 0.938546507                            | N                                            | 0                                      | N                                   |
| ZSCAN10      | 0.938546507                            | N                                            | 0                                      | N                                   |
| SLC13A4      | 0.938585529                            | N                                            | 0                                      | N                                   |
| WNT10B       | 0.938695783                            | N                                            | 30                                     | N                                   |
| WDR17        | 0.938701117                            | N                                            | 0                                      | N                                   |
| ZRANB2-AS1   | 0.93871406                             | N                                            | 0                                      | N                                   |
| ARHGAP6      | 0.938853364                            | N                                            | 1                                      | N                                   |
| AC005229.4   | 0.938872275                            | N                                            | 0                                      | N                                   |
| AC010343.1   | 0.938872275                            | N                                            | 0                                      | N                                   |
| AC039056.2   | 0.938872275                            | N                                            | 0                                      | N                                   |
| AL590644.1   | 0.938872275                            | N                                            | 0                                      | N                                   |
| HLX          | 0.938872275                            | N                                            | 1                                      | N                                   |
| LINC00921    | 0.938872275                            | N                                            | 0                                      | N                                   |
| LINC02241    | 0.938872275                            | N                                            | 0                                      | N                                   |
| MAP2K1       | 0.938872275                            | N                                            | 102                                    | Y                                   |
| MAP6D1       | 0.938872275                            | N                                            | 0                                      | N                                   |

| Gene symbols | FDR (differential expression analysis) | Differentially expressed gene? Y, Yes; N, No | Number of insulin related publications | Insulin related gene? Y, Yes; N, No |
|--------------|----------------------------------------|----------------------------------------------|----------------------------------------|-------------------------------------|
| MORF4        | 0.938872275                            | N                                            | 0                                      | N                                   |
| MYH11        | 0.938872275                            | N                                            | 3                                      | N                                   |
| PHF6         | 0.938872275                            | N                                            | 0                                      | N                                   |
| PIH1D2       | 0.938872275                            | N                                            | 0                                      | N                                   |
| RPL12P20     | 0.938872275                            | N                                            | 0                                      | N                                   |
| AC138207.7   | 0.938904933                            | N                                            | 0                                      | N                                   |
| GPC6         | 0.938918814                            | N                                            | 3                                      | N                                   |
| BLOC1S5      | 0.938927546                            | N                                            | 0                                      | N                                   |
| AL034346.1   | 0.939018435                            | N                                            | 0                                      | N                                   |
| AC090559.2   | 0.939085193                            | N                                            | 0                                      | N                                   |
| PRX          | 0.939085193                            | N                                            | 20                                     | N                                   |
| ZFP62        | 0.939085193                            | N                                            | 0                                      | N                                   |
| AC004067.1   | 0.939116204                            | N                                            | 0                                      | N                                   |
| AC007383.3   | 0.939116204                            | N                                            | 0                                      | N                                   |
| AC008072.1   | 0.939116204                            | N                                            | 0                                      | N                                   |
| AC013701.1   | 0.939116204                            | N                                            | 0                                      | N                                   |
| AC130324.1   | 0.939116204                            | N                                            | 0                                      | N                                   |
| AC234772.3   | 0.939116204                            | N                                            | 0                                      | N                                   |
| AL118496.1   | 0.939116204                            | N                                            | 0                                      | N                                   |
| LUADT1       | 0.939116204                            | N                                            | 0                                      | N                                   |
| NHSL1        | 0.939116204                            | N                                            | 1                                      | N                                   |
| ZNF71        | 0.939116204                            | N                                            | 0                                      | N                                   |
| ALOX12-AS1   | 0.939126016                            | N                                            | 0                                      | N                                   |
| PIBF1        | 0.939126016                            | N                                            | 0                                      | N                                   |
| AC005224.4   | 0.939290317                            | N                                            | 0                                      | N                                   |
| AC104596.1   | 0.939290317                            | N                                            | 0                                      | N                                   |
| ATP5C1P1     | 0.939290317                            | N                                            | 0                                      | N                                   |
| GALNT3       | 0.939290317                            | N                                            | 1                                      | N                                   |
| PHF13        | 0.939448993                            | N                                            | 0                                      | N                                   |
| PSME1        | 0.939448993                            | N                                            | 6                                      | N                                   |
| AL135818.1   | 0.939550628                            | N                                            | 0                                      | N                                   |
| MAPRE2       | 0.939600091                            | N                                            | 0                                      | N                                   |
| REV3L-IT1    | 0.939600091                            | N                                            | 0                                      | N                                   |
| PIN4         | 0.939626326                            | N                                            | 2                                      | N                                   |
| AC010997.4   | 0.939795624                            | N                                            | 0                                      | N                                   |
| AC092999.1   | 0.939948305                            | N                                            | 0                                      | N                                   |
| AC138028.6   | 0.939948305                            | N                                            | 0                                      | N                                   |
| ACTA2-AS1    | 0.939948305                            | N                                            | 0                                      | N                                   |
| AL135791.1   | 0.939948305                            | N                                            | 0                                      | N                                   |
| CLEC11A      | 0.939948305                            | N                                            | 0                                      | N                                   |
| KRTAP2-3     | 0.939948305                            | N                                            | 0                                      | N                                   |
| LRRC37A4P    | 0.939948305                            | N                                            | 0                                      | N                                   |
| MAPKAPK5     | 0.939948305                            | N                                            | 2                                      | N                                   |
| RDH11        | 0.939948305                            | N                                            | 1                                      | N                                   |
| RN7SL749P    | 0.939948305                            | N                                            | 0                                      | N                                   |
| SMIM10L1     | 0.939948305                            | N                                            | 0                                      | N                                   |
| TMEM27       | 0.939948305                            | N                                            | 13                                     | N                                   |
| VDAC1P11     | 0.939948305                            | N                                            | 0                                      | N                                   |
| WDR6         | 0.939948305                            | N                                            | 1                                      | N                                   |
| ZNF132       | 0.939948305                            | N                                            | 0                                      | N                                   |
| ZNF833P      | 0.939948305                            | N                                            | 0                                      | N                                   |
| PARM1        | 0.939986496                            | N                                            | 3                                      | N                                   |
| ETV5         | 0.939987814                            | N                                            | 7                                      | N                                   |
| RFX3-AS1     | 0.940167475                            | N                                            | 0                                      | N                                   |
| AC008741.2   | 0.940171211                            | N                                            | 0                                      | N                                   |
| AL357153.3   | 0.940171211                            | N                                            | 0                                      | N                                   |
| DHX58        | 0.940171211                            | N                                            | 1                                      | N                                   |
| LINC01429    | 0.940171211                            | N                                            | 0                                      | N                                   |
| FNTB         | 0.940206672                            | N                                            | 0                                      | N                                   |
| RHEBP2       | 0.940248592                            | N                                            | 0                                      | N                                   |
| CMIP         | 0.940291654                            | N                                            | 2                                      | N                                   |
| SLC14A2      | 0.94032097                             | N                                            | 0                                      | N                                   |
| GRIP2        | 0.940412601                            | N                                            | 0                                      | N                                   |
| LEF1-AS1     | 0.940412601                            | N                                            | 0                                      | N                                   |
| PRMT8        | 0.940412601                            | N                                            | 0                                      | N                                   |
| SLC45A1      | 0.940412601                            | N                                            | 0                                      | N                                   |

| Gene symbols | FDR (differential expression analysis) | Differentially expressed gene? Y, Yes; N, No | Number of insulin related publications | Insulin related gene? Y, Yes; N, No |
|--------------|----------------------------------------|----------------------------------------------|----------------------------------------|-------------------------------------|
| AL353804.1   | 0.940494571                            | N                                            | 0                                      | N                                   |
| AP002761.3   | 0.940494571                            | N                                            | 0                                      | N                                   |
| FAM58BP      | 0.940494571                            | N                                            | 0                                      | N                                   |
| PKHD1L1      | 0.940494571                            | N                                            | 0                                      | N                                   |
| SUSD3        | 0.940579338                            | N                                            | 1                                      | N                                   |
| AC092903.2   | 0.940599245                            | N                                            | 0                                      | N                                   |
| DGAT1        | 0.940599245                            | N                                            | 112                                    | Y                                   |
| DPH1         | 0.940599245                            | N                                            | 0                                      | N                                   |
| GNG12-AS1    | 0.940599245                            | N                                            | 0                                      | N                                   |
| IFNLR1       | 0.940599245                            | N                                            | 0                                      | N                                   |
| ISCA2P1      | 0.940599245                            | N                                            | 0                                      | N                                   |
| ISM1         | 0.940599245                            | N                                            | 0                                      | N                                   |
| MFSD13A      | 0.940599245                            | N                                            | 0                                      | N                                   |
| MYL6B        | 0.940599245                            | N                                            | 0                                      | N                                   |
| NUDT22       | 0.940599245                            | N                                            | 0                                      | N                                   |
| OSBPL5       | 0.940599245                            | N                                            | 1                                      | N                                   |
| RARSP1       | 0.940599245                            | N                                            | 0                                      | N                                   |
| RNF180       | 0.940599245                            | N                                            | 1                                      | N                                   |
| ROBO3        | 0.940599245                            | N                                            | 1                                      | N                                   |
| ZCCHC17      | 0.940599245                            | N                                            | 0                                      | N                                   |
| MRPS36       | 0.940745024                            | N                                            | 0                                      | N                                   |
| NKIRAS2      | 0.940856446                            | N                                            | 1                                      | N                                   |
| RARA-AS1     | 0.940856446                            | N                                            | 0                                      | N                                   |
| SBF1         | 0.940856446                            | N                                            | 0                                      | N                                   |
| SFRP1        | 0.940856446                            | N                                            | 13                                     | N                                   |
| VPS18        | 0.940856446                            | N                                            | 0                                      | N                                   |
| AC006249.1   | 0.940875542                            | N                                            | 0                                      | N                                   |
| AC093525.4   | 0.940875542                            | N                                            | 0                                      | N                                   |
| AC112492.5   | 0.940875542                            | N                                            | 0                                      | N                                   |
| AC142472.1   | 0.940875542                            | N                                            | 0                                      | N                                   |
| AP002761.4   | 0.940875542                            | N                                            | 0                                      | N                                   |
| CNPPD1       | 0.940875542                            | N                                            | 0                                      | N                                   |
| RPL19        | 0.940875542                            | N                                            | 1                                      | N                                   |
| VAC14-AS1    | 0.940875542                            | N                                            | 0                                      | N                                   |
| AC115618.1   | 0.940984218                            | N                                            | 0                                      | N                                   |
| IDO2         | 0.940984218                            | N                                            | 1                                      | N                                   |
| LINC02177    | 0.940984218                            | N                                            | 0                                      | N                                   |
| MAS1         | 0.940984218                            | N                                            | 3                                      | N                                   |
| AC116407.1   | 0.940984628                            | N                                            | 0                                      | N                                   |
| AKNAD1       | 0.940984628                            | N                                            | 1                                      | N                                   |
| GTF3C4       | 0.940984628                            | N                                            | 0                                      | N                                   |
| LINC00942    | 0.940984628                            | N                                            | 0                                      | N                                   |
| ST8SIA2      | 0.940984628                            | N                                            | 2                                      | N                                   |
| STX5         | 0.940984628                            | N                                            | 0                                      | N                                   |
| AC006486.2   | 0.941102464                            | N                                            | 0                                      | N                                   |
| NRROS        | 0.941102464                            | N                                            | 0                                      | N                                   |
| SLC20A1      | 0.941102464                            | N                                            | 6                                      | N                                   |
| SLC2A13      | 0.941102464                            | N                                            | 1                                      | N                                   |
| SNORA2C      | 0.941102464                            | N                                            | 0                                      | N                                   |
| TPST2        | 0.941102464                            | N                                            | 1                                      | N                                   |
| CXorf56      | 0.941167816                            | N                                            | 0                                      | N                                   |
| KLF12        | 0.941167816                            | N                                            | 1                                      | N                                   |
| SLC10A1      | 0.941195584                            | N                                            | 1                                      | N                                   |
| RAD1         | 0.941210496                            | N                                            | 3                                      | N                                   |
| AC108727.1   | 0.941314968                            | N                                            | 0                                      | N                                   |
| GAB3         | 0.941314968                            | N                                            | 2                                      | N                                   |
| C1orf216     | 0.941334505                            | N                                            | 0                                      | N                                   |
| AC021016.2   | 0.941369628                            | N                                            | 0                                      | N                                   |
| C11orf24     | 0.941371501                            | N                                            | 0                                      | N                                   |
| ZBTB10       | 0.941371501                            | N                                            | 0                                      | N                                   |
| CNTNAP3B     | 0.941380589                            | N                                            | 0                                      | N                                   |
| MGEA5        | 0.94140792                             | N                                            | 4                                      | N                                   |
| RN7SL202P    | 0.941467923                            | N                                            | 0                                      | N                                   |
| B3GALT5      | 0.94148786                             | N                                            | 0                                      | N                                   |
| CYR61        | 0.94148786                             | N                                            | 56                                     | N                                   |
| ENTPD5       | 0.941531185                            | N                                            | 2                                      | N                                   |

| Gene symbols | FDR (differential expression analysis) | Differentially expressed gene? Y, Yes; N, No | Number of insulin related publications | Insulin related gene? Y, Yes; N, No |
|--------------|----------------------------------------|----------------------------------------------|----------------------------------------|-------------------------------------|
| AL354714.1   | 0.94157814                             | N                                            | 0                                      | N                                   |
| FAM160A2     | 0.94157814                             | N                                            | 0                                      | N                                   |
| MX2          | 0.94157814                             | N                                            | 5                                      | N                                   |
| AC005304.3   | 0.94158422                             | N                                            | 0                                      | N                                   |
| AC080112.2   | 0.941607316                            | N                                            | 0                                      | N                                   |
| DALRD3       | 0.941607316                            | N                                            | 0                                      | N                                   |
| LINC01234    | 0.941607316                            | N                                            | 0                                      | N                                   |
| PAX9         | 0.941607316                            | N                                            | 0                                      | N                                   |
| SYNE3        | 0.941607316                            | N                                            | 0                                      | N                                   |
| ALS2CR12     | 0.941774358                            | N                                            | 0                                      | N                                   |
| MESD         | 0.941774358                            | N                                            | 0                                      | N                                   |
| PSME2P2      | 0.941774358                            | N                                            | 0                                      | N                                   |
| RFESD        | 0.941774358                            | N                                            | 0                                      | N                                   |
| AC020910.4   | 0.941844173                            | N                                            | 0                                      | N                                   |
| AL954705.1   | 0.941844173                            | N                                            | 0                                      | N                                   |
| NPHS1        | 0.941844173                            | N                                            | 5                                      | N                                   |
| AL512408.1   | 0.941991685                            | N                                            | 0                                      | N                                   |
| ARPC1B       | 0.941991685                            | N                                            | 2                                      | N                                   |
| C8orf31      | 0.941991685                            | N                                            | 0                                      | N                                   |
| CMC4         | 0.941991685                            | N                                            | 0                                      | N                                   |
| HAVCR2       | 0.941991685                            | N                                            | 7                                      | N                                   |
| ZNF385A      | 0.941991685                            | N                                            | 0                                      | N                                   |
| LILRA1       | 0.942006313                            | N                                            | 0                                      | N                                   |
| GNAL         | 0.942059988                            | N                                            | 0                                      | N                                   |
| LINC02108    | 0.942098701                            | N                                            | 0                                      | N                                   |
| UBAC2-AS1    | 0.942327076                            | N                                            | 0                                      | N                                   |
| ATIC         | 0.942431312                            | N                                            | 7                                      | N                                   |
| PCSK2        | 0.942431312                            | N                                            | 31                                     | N                                   |
| AC020661.1   | 0.942435268                            | N                                            | 0                                      | N                                   |
| AC022613.2   | 0.942435268                            | N                                            | 0                                      | N                                   |
| AGA          | 0.942435268                            | N                                            | 495                                    | Y                                   |
| C6orf141     | 0.942435268                            | N                                            | 0                                      | N                                   |
| EMCN         | 0.942435268                            | N                                            | 0                                      | N                                   |
| LINC01426    | 0.942435268                            | N                                            | 0                                      | N                                   |
| RPH3AL       | 0.942435268                            | N                                            | 8                                      | N                                   |
| FAM89B       | 0.942470885                            | N                                            | 1                                      | N                                   |
| NLRC3        | 0.942501058                            | N                                            | 0                                      | N                                   |
| SIRPB2       | 0.942501058                            | N                                            | 0                                      | N                                   |
| AC021146.2   | 0.942834835                            | N                                            | 0                                      | N                                   |
| AC091982.1   | 0.942857219                            | N                                            | 0                                      | N                                   |
| AL139123.1   | 0.942857219                            | N                                            | 0                                      | N                                   |
| C17orf99     | 0.942857219                            | N                                            | 0                                      | N                                   |
| LINC01176    | 0.942857219                            | N                                            | 0                                      | N                                   |
| RANBP3L      | 0.942857219                            | N                                            | 0                                      | N                                   |
| RPS4XP6      | 0.942857219                            | N                                            | 0                                      | N                                   |
| TMEM63A      | 0.942865315                            | N                                            | 0                                      | N                                   |
| AC021766.1   | 0.942924077                            | N                                            | 0                                      | N                                   |
| THEMIS2      | 0.942924077                            | N                                            | 0                                      | N                                   |
| AC005261.5   | 0.942965645                            | N                                            | 0                                      | N                                   |
| AC009137.2   | 0.942965645                            | N                                            | 0                                      | N                                   |
| AL669831.4   | 0.942965645                            | N                                            | 0                                      | N                                   |
| ATP6V1F      | 0.942965645                            | N                                            | 0                                      | N                                   |
| B4GALT2      | 0.942965645                            | N                                            | 0                                      | N                                   |
| CAVIN1       | 0.942965645                            | N                                            | 20                                     | N                                   |
| MEAF6        | 0.942965645                            | N                                            | 0                                      | N                                   |
| PP14571      | 0.942965645                            | N                                            | 0                                      | N                                   |
| SLC25A5P3    | 0.942965645                            | N                                            | 0                                      | N                                   |
| SLC35E2      | 0.942965645                            | N                                            | 0                                      | N                                   |
| ZNHIT2       | 0.942965645                            | N                                            | 0                                      | N                                   |
| CARD8        | 0.942972651                            | N                                            | 3                                      | N                                   |
| ZBTB11       | 0.942972651                            | N                                            | 0                                      | N                                   |
| AC006064.2   | 0.942973635                            | N                                            | 0                                      | N                                   |
| AC138969.1   | 0.942984179                            | N                                            | 0                                      | N                                   |
| AL118557.1   | 0.942984179                            | N                                            | 0                                      | N                                   |
| ARHGAP22-IT1 | 0.942984179                            | N                                            | 0                                      | N                                   |
| FAHD2A       | 0.942984179                            | N                                            | 1                                      | N                                   |

| Gene symbols | FDR (differential expression analysis) | Differentially expressed gene? Y, Yes; N, No | Number of insulin related publications | Insulin related gene? Y, Yes; N, No |
|--------------|----------------------------------------|----------------------------------------------|----------------------------------------|-------------------------------------|
| LINC02523    | 0.942984179                            | N                                            | 0                                      | N                                   |
| MED10        | 0.942984179                            | N                                            | 0                                      | N                                   |
| PTCHD4       | 0.942984179                            | N                                            | 0                                      | N                                   |
| SHQ1         | 0.942984179                            | N                                            | 0                                      | N                                   |
| STX3         | 0.942984179                            | N                                            | 3                                      | N                                   |
| RAB37        | 0.943069171                            | N                                            | 3                                      | N                                   |
| SUCLG2-AS1   | 0.943168847                            | N                                            | 0                                      | N                                   |
| RBM48P1      | 0.943172533                            | N                                            | 0                                      | N                                   |
| AHI1         | 0.943288204                            | N                                            | 4                                      | N                                   |
| CAAP1        | 0.943288204                            | N                                            | 0                                      | N                                   |
| ITGB2-AS1    | 0.943288204                            | N                                            | 0                                      | N                                   |
| GAPDHP35     | 0.943290481                            | N                                            | 0                                      | N                                   |
| AL137779.2   | 0.943324                               | N                                            | 0                                      | N                                   |
| TSPAN5       | 0.943324                               | N                                            | 1                                      | N                                   |
| NLGN4X       | 0.943324826                            | N                                            | 2                                      | N                                   |
| AC087623.4   | 0.943485496                            | N                                            | 0                                      | N                                   |
| AC092170.1   | 0.943485496                            | N                                            | 0                                      | N                                   |
| LCMT1-AS1    | 0.943485496                            | N                                            | 0                                      | N                                   |
| SOX17        | 0.943485496                            | N                                            | 57                                     | N                                   |
| ACOT4        | 0.943496273                            | N                                            | 0                                      | N                                   |
| HSD17B13     | 0.943496273                            | N                                            | 2                                      | N                                   |
| ITGAE        | 0.943504114                            | N                                            | 0                                      | N                                   |
| AC092683.2   | 0.943570305                            | N                                            | 0                                      | N                                   |
| PSMD6-AS2    | 0.943589702                            | N                                            | 0                                      | N                                   |
| AC105250.1   | 0.943681587                            | N                                            | 0                                      | N                                   |
| AC135977.1   | 0.943681587                            | N                                            | 0                                      | N                                   |
| ASIC3        | 0.943681587                            | N                                            | 6                                      | N                                   |
| DBET         | 0.943681587                            | N                                            | 0                                      | N                                   |
| JTB          | 0.943681587                            | N                                            | 0                                      | N                                   |
| SLC16A1      | 0.943681587                            | N                                            | 31                                     | N                                   |
| SRRM2-AS1    | 0.943681587                            | N                                            | 0                                      | N                                   |
| TMEM155      | 0.943681587                            | N                                            | 0                                      | N                                   |
| USB1         | 0.943681587                            | N                                            | 0                                      | N                                   |
| ZNF271P      | 0.943681587                            | N                                            | 0                                      | N                                   |
| ZNF700       | 0.943681587                            | N                                            | 0                                      | N                                   |
| DENND5B-AS1  | 0.943692247                            | N                                            | 0                                      | N                                   |
| NDN          | 0.943692247                            | N                                            | 10                                     | N                                   |
| RARRES3      | 0.943692247                            | N                                            | 0                                      | N                                   |
| MUC5B        | 0.943831085                            | N                                            | 5                                      | N                                   |
| AC013451.2   | 0.943835953                            | N                                            | 0                                      | N                                   |
| AL049830.3   | 0.943835953                            | N                                            | 0                                      | N                                   |
| C15orf65     | 0.943835953                            | N                                            | 0                                      | N                                   |
| RNF17        | 0.943835953                            | N                                            | 0                                      | N                                   |
| AC233290.2   | 0.943840213                            | N                                            | 0                                      | N                                   |
| AC012354.2   | 0.943946308                            | N                                            | 0                                      | N                                   |
| AC015743.1   | 0.943946308                            | N                                            | 0                                      | N                                   |
| AC124276.2   | 0.943946308                            | N                                            | 0                                      | N                                   |
| CDYL         | 0.943946308                            | N                                            | 0                                      | N                                   |
| MIR548XHG    | 0.943946308                            | N                                            | 0                                      | N                                   |
| NEK5         | 0.943946308                            | N                                            | 0                                      | N                                   |
| RAB11A       | 0.943946308                            | N                                            | 4                                      | N                                   |
| TCEA2        | 0.943946308                            | N                                            | 0                                      | N                                   |
| BBS10        | 0.944070355                            | N                                            | 1                                      | N                                   |
| CCDC144NL    | 0.944079614                            | N                                            | 0                                      | N                                   |
| GLMP         | 0.944082386                            | N                                            | 0                                      | N                                   |
| AC244394.1   | 0.944090119                            | N                                            | 0                                      | N                                   |
| HR           | 0.944090119                            | N                                            | 1000                                   | Y                                   |
| ZNF101P2     | 0.944090119                            | N                                            | 0                                      | N                                   |
| ZNF853       | 0.944090119                            | N                                            | 0                                      | N                                   |
| AC069061.4   | 0.944109045                            | N                                            | 0                                      | N                                   |
| AL604028.1   | 0.944109045                            | N                                            | 0                                      | N                                   |
| SMAD5-AS1    | 0.944109045                            | N                                            | 0                                      | N                                   |
| AC025176.1   | 0.944121758                            | N                                            | 0                                      | N                                   |
| YBX1P8       | 0.944121758                            | N                                            | 0                                      | N                                   |
| AL365361.1   | 0.944134668                            | N                                            | 0                                      | N                                   |
| DUX4L19      | 0.944273887                            | N                                            | 0                                      | N                                   |

| Gene symbols  | FDR (differential expression analysis) | Differentially expressed gene? Y, Yes; N, No | Number of insulin related publications | Insulin related gene? Y, Yes; N, No |
|---------------|----------------------------------------|----------------------------------------------|----------------------------------------|-------------------------------------|
| GPN2          | 0.944273887                            | N                                            | 0                                      | N                                   |
| PLAA          | 0.944273887                            | N                                            | 3                                      | N                                   |
| TMUB1         | 0.944486124                            | N                                            | 0                                      | N                                   |
| AC004982.2    | 0.944596268                            | N                                            | 0                                      | N                                   |
| AC016526.3    | 0.944596268                            | N                                            | 0                                      | N                                   |
| AC073254.1    | 0.944596268                            | N                                            | 0                                      | N                                   |
| AC093909.4    | 0.944596268                            | N                                            | 0                                      | N                                   |
| AC105277.1    | 0.944596268                            | N                                            | 0                                      | N                                   |
| AL021707.6    | 0.944596268                            | N                                            | 0                                      | N                                   |
| AL359999.1    | 0.944596268                            | N                                            | 0                                      | N                                   |
| CD96          | 0.944596268                            | N                                            | 0                                      | N                                   |
| DLSTP1        | 0.944596268                            | N                                            | 0                                      | N                                   |
| ELOC          | 0.944596268                            | N                                            | 1                                      | N                                   |
| FAR1-IT1      | 0.944596268                            | N                                            | 0                                      | N                                   |
| GUCY1A3       | 0.944596268                            | N                                            | 0                                      | N                                   |
| HSF5          | 0.944596268                            | N                                            | 1                                      | N                                   |
| IGFALS        | 0.944596268                            | N                                            | 78                                     | N                                   |
| LPAR3         | 0.944596268                            | N                                            | 1                                      | N                                   |
| LPAR4         | 0.944596268                            | N                                            | 0                                      | N                                   |
| LRRTM2        | 0.944596268                            | N                                            | 0                                      | N                                   |
| MAPK8         | 0.944596268                            | N                                            | 139                                    | Y                                   |
| NBPF19        | 0.944596268                            | N                                            | 0                                      | N                                   |
| NECAP2        | 0.944596268                            | N                                            | 0                                      | N                                   |
| NOTCH2NL      | 0.944596268                            | N                                            | 0                                      | N                                   |
| NSMCE3        | 0.944596268                            | N                                            | 0                                      | N                                   |
| PDZK1         | 0.944596268                            | N                                            | 7                                      | N                                   |
| PIP5K1P2      | 0.944596268                            | N                                            | 0                                      | N                                   |
| POTEE         | 0.944596268                            | N                                            | 0                                      | N                                   |
| RAB3IP        | 0.944596268                            | N                                            | 0                                      | N                                   |
| RER1          | 0.944596268                            | N                                            | 0                                      | N                                   |
| RNF138P1      | 0.944596268                            | N                                            | 0                                      | N                                   |
| SPNS2         | 0.944596268                            | N                                            | 1                                      | N                                   |
| VDAC1         | 0.944596268                            | N                                            | 14                                     | N                                   |
| SPTSSA        | 0.944688756                            | N                                            | 0                                      | N                                   |
| KLF16         | 0.944719228                            | N                                            | 0                                      | N                                   |
| MAP2K2        | 0.944719228                            | N                                            | 27                                     | N                                   |
| MYO18A        | 0.944719228                            | N                                            | 0                                      | N                                   |
| OGFRL1        | 0.944719228                            | N                                            | 0                                      | N                                   |
| PMS2P4        | 0.944719228                            | N                                            | 0                                      | N                                   |
| ZNF99         | 0.944719228                            | N                                            | 0                                      | N                                   |
| EFCAB5        | 0.944738136                            | N                                            | 0                                      | N                                   |
| ZFP69         | 0.944738136                            | N                                            | 4                                      | N                                   |
| FBXO8         | 0.944940401                            | N                                            | 0                                      | N                                   |
| AC007952.2    | 0.944971917                            | N                                            | 0                                      | N                                   |
| AC079801.1    | 0.944971917                            | N                                            | 0                                      | N                                   |
| AJ011931.1    | 0.944971917                            | N                                            | 0                                      | N                                   |
| AL021578.1    | 0.944971917                            | N                                            | 0                                      | N                                   |
| AL365181.1    | 0.944971917                            | N                                            | 0                                      | N                                   |
| DYNLT3P1      | 0.944971917                            | N                                            | 0                                      | N                                   |
| LINC01111     | 0.944971917                            | N                                            | 0                                      | N                                   |
| NHLRC2        | 0.944971917                            | N                                            | 1                                      | N                                   |
| TSPAN13       | 0.944971917                            | N                                            | 0                                      | N                                   |
| AC019227.1    | 0.945050523                            | N                                            | 0                                      | N                                   |
| AC020928.1    | 0.945050523                            | N                                            | 0                                      | N                                   |
| AL662797.3    | 0.945050523                            | N                                            | 0                                      | N                                   |
| AP001107.5    | 0.945050523                            | N                                            | 0                                      | N                                   |
| DDX10P2       | 0.945050523                            | N                                            | 0                                      | N                                   |
| NDST2         | 0.945050523                            | N                                            | 0                                      | N                                   |
| PRPS1P2       | 0.945050523                            | N                                            | 0                                      | N                                   |
| AC007686.3    | 0.945231274                            | N                                            | 0                                      | N                                   |
| MTCL1         | 0.945231274                            | N                                            | 0                                      | N                                   |
| OAZ1          | 0.945231274                            | N                                            | 1                                      | N                                   |
| RP11-258C19.7 | 0.945231274                            | N                                            | 0                                      | N                                   |
| RSU1P3        | 0.945231274                            | N                                            | 0                                      | N                                   |
| SNORA80B      | 0.945231274                            | N                                            | 0                                      | N                                   |
| UNC13A        | 0.945231274                            | N                                            | 7                                      | N                                   |

| Gene symbols | FDR (differential expression analysis) | Differentially expressed gene? Y, Yes; N, No | Number of insulin related publications | Insulin related gene? Y, Yes; N, No |
|--------------|----------------------------------------|----------------------------------------------|----------------------------------------|-------------------------------------|
| ZDHHC14      | 0.945231274                            | N                                            | 0                                      | N                                   |
| ZNF252P-AS1  | 0.945231274                            | N                                            | 0                                      | N                                   |
| YKT6         | 0.945311099                            | N                                            | 1                                      | N                                   |
| AC005332.2   | 0.945403406                            | N                                            | 0                                      | N                                   |
| AC009078.1   | 0.945403406                            | N                                            | 0                                      | N                                   |
| AC009716.2   | 0.945403406                            | N                                            | 0                                      | N                                   |
| AC018521.5   | 0.945403406                            | N                                            | 0                                      | N                                   |
| AC078881.1   | 0.945403406                            | N                                            | 0                                      | N                                   |
| AC090198.1   | 0.945403406                            | N                                            | 0                                      | N                                   |
| ACSL1        | 0.945403406                            | N                                            | 44                                     | N                                   |
| ADRA2C       | 0.945403406                            | N                                            | 5                                      | N                                   |
| AL356776.1   | 0.945403406                            | N                                            | 0                                      | N                                   |
| AL365214.2   | 0.945403406                            | N                                            | 0                                      | N                                   |
| ARID3A       | 0.945403406                            | N                                            | 0                                      | N                                   |
| C9orf170     | 0.945403406                            | N                                            | 0                                      | N                                   |
| CST6         | 0.945403406                            | N                                            | 1                                      | N                                   |
| FAM180A      | 0.945403406                            | N                                            | 0                                      | N                                   |
| FRAT1        | 0.945403406                            | N                                            | 5                                      | N                                   |
| FRMD1        | 0.945403406                            | N                                            | 0                                      | N                                   |
| GPR63        | 0.945403406                            | N                                            | 0                                      | N                                   |
| IPP          | 0.945403406                            | N                                            | 74                                     | N                                   |
| KCNJ2-AS1    | 0.945403406                            | N                                            | 0                                      | N                                   |
| LRIT3        | 0.945403406                            | N                                            | 0                                      | N                                   |
| PCSK1N       | 0.945403406                            | N                                            | 5                                      | N                                   |
| PDCD6IPP1    | 0.945403406                            | N                                            | 0                                      | N                                   |
| PI4KB        | 0.945403406                            | N                                            | 1                                      | N                                   |
| PMS2P3       | 0.945403406                            | N                                            | 0                                      | N                                   |
| RBKS         | 0.945403406                            | N                                            | 0                                      | N                                   |
| TIMM23       | 0.945403406                            | N                                            | 0                                      | N                                   |
| USP11        | 0.945403406                            | N                                            | 1                                      | N                                   |
| ELMSAN1      | 0.945459418                            | N                                            | 0                                      | N                                   |
| ETV2         | 0.945506219                            | N                                            | 0                                      | N                                   |
| TSGA13       | 0.945545227                            | N                                            | 0                                      | N                                   |
| ROGDI        | 0.94565472                             | N                                            | 0                                      | N                                   |
| AC004801.7   | 0.945659108                            | N                                            | 0                                      | N                                   |
| GPAA1        | 0.945659108                            | N                                            | 0                                      | N                                   |
| GUCA1B       | 0.945659108                            | N                                            | 0                                      | N                                   |
| AC006277.1   | 0.945753779                            | N                                            | 0                                      | N                                   |
| AC084017.1   | 0.945753779                            | N                                            | 0                                      | N                                   |
| AC098820.1   | 0.945753779                            | N                                            | 0                                      | N                                   |
| AL353997.2   | 0.945753779                            | N                                            | 0                                      | N                                   |
| CCL28        | 0.945753779                            | N                                            | 3                                      | N                                   |
| CLVS1        | 0.945753779                            | N                                            | 0                                      | N                                   |
| POLR3GL      | 0.945753779                            | N                                            | 0                                      | N                                   |
| VPS51        | 0.945753779                            | N                                            | 1                                      | N                                   |
| ZNF24        | 0.945753779                            | N                                            | 0                                      | N                                   |
| GTPBP8       | 0.945763338                            | N                                            | 0                                      | N                                   |
| USP32P1      | 0.945825958                            | N                                            | 0                                      | N                                   |
| SH2D5        | 0.945842437                            | N                                            | 0                                      | N                                   |
| CA5BP1       | 0.945845184                            | N                                            | 0                                      | N                                   |
| AL022344.2   | 0.945860612                            | N                                            | 0                                      | N                                   |
| GPR180       | 0.946053625                            | N                                            | 0                                      | N                                   |
| HS6ST1P1     | 0.946053625                            | N                                            | 0                                      | N                                   |
| IL10         | 0.946053625                            | N                                            | 660                                    | Y                                   |
| AC245052.3   | 0.946110962                            | N                                            | 0                                      | N                                   |
| AL162171.1   | 0.946110962                            | N                                            | 0                                      | N                                   |
| AL845472.1   | 0.946110962                            | N                                            | 0                                      | N                                   |
| PER1         | 0.946110962                            | N                                            | 61                                     | N                                   |
| KRT13        | 0.946210848                            | N                                            | 0                                      | N                                   |
| SYNE1        | 0.946210848                            | N                                            | 0                                      | N                                   |
| CCND3P1      | 0.946353452                            | N                                            | 0                                      | N                                   |
| ATF5         | 0.946446453                            | N                                            | 4                                      | N                                   |
| ELOCP18      | 0.946446453                            | N                                            | 0                                      | N                                   |
| SPATA1       | 0.946446453                            | N                                            | 0                                      | N                                   |
| AC025259.2   | 0.946449049                            | N                                            | 0                                      | N                                   |
| KXD1         | 0.946508146                            | N                                            | 0                                      | N                                   |

| Gene symbols | FDR (differential expression analysis) | Differentially expressed gene? Y, Yes; N, No | Number of insulin related publications | Insulin related gene? Y, Yes; N, No |
|--------------|----------------------------------------|----------------------------------------------|----------------------------------------|-------------------------------------|
| PAPD5        | 0.946508146                            | N                                            | 0                                      | N                                   |
| ZNF19        | 0.946508146                            | N                                            | 0                                      | N                                   |
| AC007614.5   | 0.946546322                            | N                                            | 0                                      | N                                   |
| AC074029.2   | 0.946546322                            | N                                            | 0                                      | N                                   |
| AC104986.1   | 0.946546322                            | N                                            | 0                                      | N                                   |
| AL161901.1   | 0.946546322                            | N                                            | 0                                      | N                                   |
| AL357153.4   | 0.946546322                            | N                                            | 0                                      | N                                   |
| AL603766.1   | 0.946546322                            | N                                            | 0                                      | N                                   |
| CCDC14       | 0.946546322                            | N                                            | 1                                      | N                                   |
| LINC00632    | 0.946546322                            | N                                            | 0                                      | N                                   |
| MRAP2        | 0.946546322                            | N                                            | 1                                      | N                                   |
| MTRF1        | 0.946546322                            | N                                            | 0                                      | N                                   |
| PLOD3        | 0.946546322                            | N                                            | 1                                      | N                                   |
| SLC1A3       | 0.946546322                            | N                                            | 10                                     | N                                   |
| TRIM5        | 0.946546322                            | N                                            | 0                                      | N                                   |
| FLJ16779     | 0.946637667                            | N                                            | 0                                      | N                                   |
| TMBIM1       | 0.946725091                            | N                                            | 2                                      | N                                   |
| SDHAF2       | 0.946727381                            | N                                            | 0                                      | N                                   |
| AC127070.1   | 0.946732521                            | N                                            | 0                                      | N                                   |
| AC234781.2   | 0.946878002                            | N                                            | 0                                      | N                                   |
| H2BFM        | 0.946878002                            | N                                            | 0                                      | N                                   |
| TACR1        | 0.946878002                            | N                                            | 4                                      | N                                   |
| AP001062.3   | 0.946912979                            | N                                            | 0                                      | N                                   |
| EFCAB7       | 0.946943342                            | N                                            | 0                                      | N                                   |
| EXOC7        | 0.946943342                            | N                                            | 7                                      | N                                   |
| MAPK9        | 0.946943342                            | N                                            | 7                                      | N                                   |
| RBM6         | 0.946943342                            | N                                            | 1                                      | N                                   |
| TBC1D10C     | 0.946943342                            | N                                            | 0                                      | N                                   |
| TYMP         | 0.946943342                            | N                                            | 0                                      | N                                   |
| AC130371.2   | 0.947077421                            | N                                            | 0                                      | N                                   |
| AC234782.4   | 0.947077421                            | N                                            | 0                                      | N                                   |
| AL031651.1   | 0.947077421                            | N                                            | 0                                      | N                                   |
| AL133492.1   | 0.947077421                            | N                                            | 0                                      | N                                   |
| AL136038.4   | 0.947077421                            | N                                            | 0                                      | N                                   |
| AL590867.2   | 0.947077421                            | N                                            | 0                                      | N                                   |
| AP005403.1   | 0.947077421                            | N                                            | 0                                      | N                                   |
| AP006285.2   | 0.947077421                            | N                                            | 0                                      | N                                   |
| FKBP5        | 0.947077421                            | N                                            | 18                                     | N                                   |
| GRM6         | 0.947077421                            | N                                            | 0                                      | N                                   |
| KLF6         | 0.947077421                            | N                                            | 11                                     | N                                   |
| LINC01226    | 0.947077421                            | N                                            | 0                                      | N                                   |
| POLR2J4      | 0.947077421                            | N                                            | 0                                      | N                                   |
| PQLC1        | 0.947077421                            | N                                            | 0                                      | N                                   |
| SEMA3F-AS1   | 0.947077421                            | N                                            | 0                                      | N                                   |
| ZNF518A      | 0.947077421                            | N                                            | 0                                      | N                                   |
| ABCC2        | 0.947093639                            | N                                            | 7                                      | N                                   |
| AC092143.1   | 0.947093639                            | N                                            | 0                                      | N                                   |
| AC125494.2   | 0.947093639                            | N                                            | 0                                      | N                                   |
| AP001180.5   | 0.947093639                            | N                                            | 0                                      | N                                   |
| CABLES1      | 0.947093639                            | N                                            | 2                                      | N                                   |
| CORO7-PAM16  | 0.947093639                            | N                                            | 0                                      | N                                   |
| DEAF1        | 0.947093639                            | N                                            | 1                                      | N                                   |
| FAM19A2      | 0.947093639                            | N                                            | 1                                      | N                                   |
| IDH3G        | 0.947093639                            | N                                            | 2                                      | N                                   |
| LIN28A       | 0.947093639                            | N                                            | 13                                     | N                                   |
| LINC01819    | 0.947093639                            | N                                            | 0                                      | N                                   |
| MPV17L       | 0.947093639                            | N                                            | 0                                      | N                                   |
| NOS1         | 0.947093639                            | N                                            | 75                                     | N                                   |
| SPDYA        | 0.947093639                            | N                                            | 0                                      | N                                   |
| ZBTB39       | 0.947093639                            | N                                            | 0                                      | N                                   |
| AC121338.2   | 0.947137108                            | N                                            | 0                                      | N                                   |
| AC138517.1   | 0.947137108                            | N                                            | 0                                      | N                                   |
| AL450003.2   | 0.947137108                            | N                                            | 0                                      | N                                   |
| C17orf49     | 0.947137108                            | N                                            | 0                                      | N                                   |
| GLUD1P2      | 0.947137108                            | N                                            | 0                                      | N                                   |
| LINC02133    | 0.947137108                            | N                                            | 0                                      | N                                   |



| Gene symbols | FDR (differential expression analysis) | Differentially expressed gene? Y, Yes; N, No | Number of insulin related publications | Insulin related gene? Y, Yes; N, No |
|--------------|----------------------------------------|----------------------------------------------|----------------------------------------|-------------------------------------|
| ATG4C        | 0.947232783                            | N                                            | 0                                      | N                                   |
| BRSK2        | 0.947232783                            | N                                            | 7                                      | N                                   |
| TMEM39B      | 0.947232783                            | N                                            | 0                                      | N                                   |
| HLF          | 0.947341389                            | N                                            | 17                                     | N                                   |
| LINC01521    | 0.947341389                            | N                                            | 0                                      | N                                   |
| AC012322.1   | 0.947379322                            | N                                            | 0                                      | N                                   |
| AC133065.5   | 0.947379322                            | N                                            | 0                                      | N                                   |
| AC245041.1   | 0.947379322                            | N                                            | 0                                      | N                                   |
| ANXA6        | 0.947379322                            | N                                            | 3                                      | N                                   |
| CREB5        | 0.947379322                            | N                                            | 2                                      | N                                   |
| HEBP2        | 0.947379322                            | N                                            | 0                                      | N                                   |
| KRBOX1       | 0.947379322                            | N                                            | 0                                      | N                                   |
| SNORA47      | 0.947379322                            | N                                            | 0                                      | N                                   |
| AC008764.10  | 0.94738002                             | N                                            | 0                                      | N                                   |
| LAMTOR2      | 0.94738002                             | N                                            | 0                                      | N                                   |
| LRRC29       | 0.94738002                             | N                                            | 0                                      | N                                   |
| PLAC8L1      | 0.94738002                             | N                                            | 0                                      | N                                   |
| AL121718.1   | 0.947412976                            | N                                            | 0                                      | N                                   |
| AC092164.1   | 0.947437533                            | N                                            | 0                                      | N                                   |
| BCKDHA       | 0.947437533                            | N                                            | 6                                      | N                                   |
| SDCCAG3P1    | 0.947437533                            | N                                            | 0                                      | N                                   |
| SORT1        | 0.947437533                            | N                                            | 10                                     | N                                   |
| GPRC5D-AS1   | 0.947463132                            | N                                            | 0                                      | N                                   |
| UBE3C        | 0.947463132                            | N                                            | 1                                      | N                                   |
| AC004490.1   | 0.947609955                            | N                                            | 0                                      | N                                   |
| AL162741.1   | 0.947609955                            | N                                            | 0                                      | N                                   |
| ATP6V0E1P2   | 0.947609955                            | N                                            | 0                                      | N                                   |
| C5orf66      | 0.947609955                            | N                                            | 0                                      | N                                   |
| COX11P1      | 0.947609955                            | N                                            | 0                                      | N                                   |
| DUSP5P1      | 0.947609955                            | N                                            | 0                                      | N                                   |
| HSPE1P26     | 0.947609955                            | N                                            | 0                                      | N                                   |
| KB-1674E1.2  | 0.947609955                            | N                                            | 0                                      | N                                   |
| LINC01569    | 0.947609955                            | N                                            | 0                                      | N                                   |
| NDUFB11P1    | 0.947609955                            | N                                            | 0                                      | N                                   |
| PTCSC3       | 0.947609955                            | N                                            | 1                                      | N                                   |
| UNC119       | 0.947609955                            | N                                            | 0                                      | N                                   |
| ZNF416       | 0.947609955                            | N                                            | 0                                      | N                                   |
| SLC39A8      | 0.947628965                            | N                                            | 4                                      | N                                   |
| WDR18        | 0.947628965                            | N                                            | 0                                      | N                                   |
| IRF2BPL      | 0.947640676                            | N                                            | 0                                      | N                                   |
| METTL23      | 0.947640676                            | N                                            | 0                                      | N                                   |
| RACK1        | 0.947640676                            | N                                            | 31                                     | N                                   |
| GAPDH        | 0.947738472                            | N                                            | 185                                    | Y                                   |
| REEP2        | 0.947738472                            | N                                            | 0                                      | N                                   |
| SNRNP70      | 0.947738472                            | N                                            | 0                                      | N                                   |
| VPS45        | 0.947738472                            | N                                            | 1                                      | N                                   |
| ZBTB8OSP2    | 0.947738472                            | N                                            | 0                                      | N                                   |
| AHCYP7       | 0.947908888                            | N                                            | 0                                      | N                                   |
| CHRN2        | 0.947908888                            | N                                            | 1                                      | N                                   |
| FDFT1        | 0.947908888                            | N                                            | 4                                      | N                                   |
| PDE4A        | 0.947908888                            | N                                            | 3                                      | N                                   |
| RANBP2       | 0.947908888                            | N                                            | 2                                      | N                                   |
| TMEM179      | 0.947908888                            | N                                            | 0                                      | N                                   |
| TMEM99       | 0.947908888                            | N                                            | 0                                      | N                                   |
| TTC23        | 0.947908888                            | N                                            | 0                                      | N                                   |
| EPHA3        | 0.947925069                            | N                                            | 8                                      | N                                   |
| AC008708.2   | 0.947930458                            | N                                            | 0                                      | N                                   |
| CALU         | 0.947930458                            | N                                            | 23                                     | N                                   |
| MYO1C        | 0.947930458                            | N                                            | 17                                     | N                                   |
| SCARNA13     | 0.947930458                            | N                                            | 0                                      | N                                   |
| TMIGD3       | 0.947930458                            | N                                            | 0                                      | N                                   |
| ULK2         | 0.947930458                            | N                                            | 5                                      | N                                   |
| WASH3P       | 0.947930458                            | N                                            | 0                                      | N                                   |
| MTX2         | 0.948003247                            | N                                            | 0                                      | N                                   |
| LDLRAD3      | 0.948143251                            | N                                            | 0                                      | N                                   |
| NOCT         | 0.948209121                            | N                                            | 0                                      | N                                   |

| Gene symbols | FDR (differential expression analysis) | Differentially expressed gene? Y, Yes; N, No | Number of insulin related publications | Insulin related gene? Y, Yes; N, No |
|--------------|----------------------------------------|----------------------------------------------|----------------------------------------|-------------------------------------|
| NOL3         | 0.948215205                            | N                                            | 2                                      | N                                   |
| TMEM256      | 0.948294393                            | N                                            | 0                                      | N                                   |
| AC005616.1   | 0.94842423                             | N                                            | 0                                      | N                                   |
| AL354714.2   | 0.94842423                             | N                                            | 0                                      | N                                   |
| XPO6         | 0.94843003                             | N                                            | 0                                      | N                                   |
| ZNHIT1       | 0.948433264                            | N                                            | 0                                      | N                                   |
| SPOPL        | 0.948441625                            | N                                            | 0                                      | N                                   |
| AL596247.1   | 0.948449388                            | N                                            | 0                                      | N                                   |
| CLUH         | 0.948570688                            | N                                            | 0                                      | N                                   |
| IRS1         | 0.948570688                            | N                                            | 1000                                   | Y                                   |
| TCEAL3       | 0.948570688                            | N                                            | 0                                      | N                                   |
| GCNT1        | 0.948594207                            | N                                            | 0                                      | N                                   |
| PRKCZ        | 0.948594207                            | N                                            | 11                                     | N                                   |
| UBL5         | 0.948594207                            | N                                            | 6                                      | N                                   |
| KCNK4        | 0.948639367                            | N                                            | 0                                      | N                                   |
| AC087280.1   | 0.948834311                            | N                                            | 0                                      | N                                   |
| BECN1        | 0.948834311                            | N                                            | 43                                     | N                                   |
| CXCR6        | 0.948834311                            | N                                            | 2                                      | N                                   |
| KIAA0408     | 0.948834311                            | N                                            | 0                                      | N                                   |
| LINC01238    | 0.948834311                            | N                                            | 0                                      | N                                   |
| RPL21        | 0.948834311                            | N                                            | 0                                      | N                                   |
| ZBTB18       | 0.948834311                            | N                                            | 0                                      | N                                   |
| AC005392.1   | 0.948886746                            | N                                            | 0                                      | N                                   |
| AC092683.1   | 0.948886746                            | N                                            | 0                                      | N                                   |
| BLOC1S6      | 0.948886746                            | N                                            | 0                                      | N                                   |
| TRIM56       | 0.948886746                            | N                                            | 0                                      | N                                   |
| INAFM1       | 0.948997576                            | N                                            | 0                                      | N                                   |
| RPRD1B       | 0.948997576                            | N                                            | 0                                      | N                                   |
| ZNF300P1     | 0.948997576                            | N                                            | 0                                      | N                                   |
| ATP6V1E1P1   | 0.949048283                            | N                                            | 0                                      | N                                   |
| PEX10        | 0.949048283                            | N                                            | 0                                      | N                                   |
| CCDC28A      | 0.949163788                            | N                                            | 0                                      | N                                   |
| IL17RD       | 0.949163788                            | N                                            | 3                                      | N                                   |
| KCNK3        | 0.949163788                            | N                                            | 1                                      | N                                   |
| AC103591.2   | 0.949173684                            | N                                            | 0                                      | N                                   |
| EPM2AIP1     | 0.949173684                            | N                                            | 1                                      | N                                   |
| LGII         | 0.949173684                            | N                                            | 0                                      | N                                   |
| UNC13B       | 0.949173684                            | N                                            | 5                                      | N                                   |
| AL024493.1   | 0.949250024                            | N                                            | 0                                      | N                                   |
| CD160        | 0.949250024                            | N                                            | 0                                      | N                                   |
| MORN2        | 0.949250024                            | N                                            | 0                                      | N                                   |
| PTPN18       | 0.949250024                            | N                                            | 1                                      | N                                   |
| LINC02421    | 0.949260878                            | N                                            | 0                                      | N                                   |
| REXO1        | 0.949365966                            | N                                            | 0                                      | N                                   |
| TNFRSF10A    | 0.949412107                            | N                                            | 4                                      | N                                   |
| AC007848.2   | 0.949510786                            | N                                            | 0                                      | N                                   |
| AP000786.1   | 0.949510786                            | N                                            | 0                                      | N                                   |
| C6orf203     | 0.949510786                            | N                                            | 0                                      | N                                   |
| STRA6        | 0.949510786                            | N                                            | 18                                     | N                                   |
| RAB17        | 0.949524561                            | N                                            | 0                                      | N                                   |
| AC027601.3   | 0.949560599                            | N                                            | 0                                      | N                                   |
| MIPEP        | 0.949560599                            | N                                            | 0                                      | N                                   |
| AC008875.1   | 0.949604647                            | N                                            | 0                                      | N                                   |
| HINT1P1      | 0.949604647                            | N                                            | 0                                      | N                                   |
| RRP8         | 0.949604647                            | N                                            | 0                                      | N                                   |
| SAMM50P1     | 0.949604647                            | N                                            | 0                                      | N                                   |
| AL356056.1   | 0.949691645                            | N                                            | 0                                      | N                                   |
| C21orf62     | 0.949725496                            | N                                            | 0                                      | N                                   |
| MRPL4        | 0.949725496                            | N                                            | 0                                      | N                                   |
| RFXAP        | 0.949725496                            | N                                            | 0                                      | N                                   |
| CNOT7P2      | 0.949767993                            | N                                            | 0                                      | N                                   |
| FKBP1C       | 0.949767993                            | N                                            | 0                                      | N                                   |
| SOX30        | 0.949767993                            | N                                            | 0                                      | N                                   |
| AC018665.1   | 0.949809867                            | N                                            | 0                                      | N                                   |
| AC108704.2   | 0.949809867                            | N                                            | 0                                      | N                                   |
| SLC6A10P     | 0.949809867                            | N                                            | 0                                      | N                                   |

| Gene symbols | FDR (differential expression analysis) | Differentially expressed gene? Y, Yes; N, No | Number of insulin related publications | Insulin related gene? Y, Yes; N, No |
|--------------|----------------------------------------|----------------------------------------------|----------------------------------------|-------------------------------------|
| H2AFY2       | 0.949890064                            | N                                            | 0                                      | N                                   |
| AC015818.2   | 0.94993913                             | N                                            | 0                                      | N                                   |
| AL365184.1   | 0.94993913                             | N                                            | 0                                      | N                                   |
| EFS          | 0.94993913                             | N                                            | 42                                     | N                                   |
| EIF4E2       | 0.94993913                             | N                                            | 1                                      | N                                   |
| GOLGA2P1     | 0.94993913                             | N                                            | 0                                      | N                                   |
| NELFA        | 0.94993913                             | N                                            | 0                                      | N                                   |
| MOB2         | 0.949948289                            | N                                            | 1                                      | N                                   |
| CCDC22       | 0.950120029                            | N                                            | 0                                      | N                                   |
| CTBP1-AS2    | 0.950120029                            | N                                            | 0                                      | N                                   |
| SMARCAD1     | 0.950120029                            | N                                            | 1                                      | N                                   |
| AC025423.3   | 0.950139826                            | N                                            | 0                                      | N                                   |
| AC114763.1   | 0.950139826                            | N                                            | 0                                      | N                                   |
| AC244517.11  | 0.950139826                            | N                                            | 0                                      | N                                   |
| FAM193B      | 0.950139826                            | N                                            | 0                                      | N                                   |
| GPBP1L1      | 0.950139826                            | N                                            | 0                                      | N                                   |
| GPR12        | 0.950139826                            | N                                            | 0                                      | N                                   |
| MIPEPP1      | 0.950139826                            | N                                            | 0                                      | N                                   |
| MVB12A       | 0.950139826                            | N                                            | 0                                      | N                                   |
| NPIPP1       | 0.950139826                            | N                                            | 0                                      | N                                   |
| RAP2C        | 0.950139826                            | N                                            | 0                                      | N                                   |
| AC007881.3   | 0.950140173                            | N                                            | 0                                      | N                                   |
| AC090152.1   | 0.950140173                            | N                                            | 0                                      | N                                   |
| AC091691.1   | 0.950140173                            | N                                            | 0                                      | N                                   |
| AC096733.2   | 0.950140173                            | N                                            | 0                                      | N                                   |
| AC099689.1   | 0.950140173                            | N                                            | 0                                      | N                                   |
| ACTR2        | 0.950140173                            | N                                            | 2                                      | N                                   |
| ANKRD18B     | 0.950140173                            | N                                            | 0                                      | N                                   |
| ANO9         | 0.950140173                            | N                                            | 0                                      | N                                   |
| BCAP31       | 0.950140173                            | N                                            | 1                                      | N                                   |
| C11orf58     | 0.950140173                            | N                                            | 0                                      | N                                   |
| CLDN15       | 0.950140173                            | N                                            | 0                                      | N                                   |
| CNTN1        | 0.950140173                            | N                                            | 1                                      | N                                   |
| DDAH2        | 0.950140173                            | N                                            | 7                                      | N                                   |
| FAM206A      | 0.950140173                            | N                                            | 0                                      | N                                   |
| GAD2         | 0.950140173                            | N                                            | 12                                     | N                                   |
| IPO8P1       | 0.950140173                            | N                                            | 0                                      | N                                   |
| POM121C      | 0.950140173                            | N                                            | 1                                      | N                                   |
| PPP1R12C     | 0.950140173                            | N                                            | 0                                      | N                                   |
| SLC13A5      | 0.950140173                            | N                                            | 9                                      | N                                   |
| TMEM158      | 0.950140173                            | N                                            | 0                                      | N                                   |
| TMEM164      | 0.950140173                            | N                                            | 0                                      | N                                   |
| ZFYVE27      | 0.950140173                            | N                                            | 0                                      | N                                   |
| ZPR1         | 0.950140173                            | N                                            | 1                                      | N                                   |
| TIPRL        | 0.950259306                            | N                                            | 0                                      | N                                   |
| AC004057.1   | 0.950360884                            | N                                            | 0                                      | N                                   |
| AC016027.1   | 0.950360884                            | N                                            | 0                                      | N                                   |
| AC018653.3   | 0.950360884                            | N                                            | 0                                      | N                                   |
| AC068631.1   | 0.950360884                            | N                                            | 0                                      | N                                   |
| AC104938.1   | 0.950360884                            | N                                            | 0                                      | N                                   |
| ACTR3        | 0.950360884                            | N                                            | 1                                      | N                                   |
| AL358176.3   | 0.950360884                            | N                                            | 0                                      | N                                   |
| AL512286.1   | 0.950360884                            | N                                            | 0                                      | N                                   |
| CAPN3        | 0.950360884                            | N                                            | 6                                      | N                                   |
| FGL2         | 0.950360884                            | N                                            | 1                                      | N                                   |
| MAL2         | 0.950360884                            | N                                            | 1                                      | N                                   |
| NR2F1        | 0.950360884                            | N                                            | 3                                      | N                                   |
| VPS4B        | 0.950360884                            | N                                            | 1                                      | N                                   |
| YIF1B        | 0.950360884                            | N                                            | 0                                      | N                                   |
| AC068338.3   | 0.950492717                            | N                                            | 0                                      | N                                   |
| AC105114.1   | 0.950492717                            | N                                            | 0                                      | N                                   |
| AC124944.3   | 0.950492717                            | N                                            | 0                                      | N                                   |
| CLIC3        | 0.950513009                            | N                                            | 0                                      | N                                   |
| PAXBP1-AS1   | 0.950517074                            | N                                            | 0                                      | N                                   |
| AC024243.1   | 0.950578546                            | N                                            | 0                                      | N                                   |
| AC016877.3   | 0.950584827                            | N                                            | 0                                      | N                                   |

| Gene symbols | FDR (differential expression analysis) | Differentially expressed gene? Y, Yes; N, No | Number of insulin related publications | Insulin related gene? Y, Yes; N, No |
|--------------|----------------------------------------|----------------------------------------------|----------------------------------------|-------------------------------------|
| AC093249.6   | 0.950584827                            | N                                            | 0                                      | N                                   |
| AC234582.1   | 0.950584827                            | N                                            | 0                                      | N                                   |
| AIFM3        | 0.950584827                            | N                                            | 0                                      | N                                   |
| CCDC88C      | 0.950584827                            | N                                            | 0                                      | N                                   |
| COX4I1P1     | 0.950584827                            | N                                            | 0                                      | N                                   |
| MSANTD3      | 0.950584827                            | N                                            | 0                                      | N                                   |
| PLXNB3       | 0.950584827                            | N                                            | 0                                      | N                                   |
| RPL41P2      | 0.950584827                            | N                                            | 0                                      | N                                   |
| TNK1         | 0.950584827                            | N                                            | 0                                      | N                                   |
| TRAPPC12     | 0.950584827                            | N                                            | 0                                      | N                                   |
| DYNC1I2      | 0.950591589                            | N                                            | 0                                      | N                                   |
| TRMT5        | 0.950591589                            | N                                            | 0                                      | N                                   |
| SLC28A3      | 0.950600952                            | N                                            | 2                                      | N                                   |
| SRD5A3-AS1   | 0.950600952                            | N                                            | 0                                      | N                                   |
| EIF4G2       | 0.950623235                            | N                                            | 1                                      | N                                   |
| LINC02256    | 0.950753527                            | N                                            | 0                                      | N                                   |
| EIF2D        | 0.950883173                            | N                                            | 0                                      | N                                   |
| Z98043.1     | 0.950987831                            | N                                            | 0                                      | N                                   |
| AC026474.1   | 0.951031363                            | N                                            | 0                                      | N                                   |
| AC073109.1   | 0.951031363                            | N                                            | 0                                      | N                                   |
| AC083836.1   | 0.951031363                            | N                                            | 0                                      | N                                   |
| AC092802.1   | 0.951031363                            | N                                            | 0                                      | N                                   |
| AC131235.1   | 0.951031363                            | N                                            | 0                                      | N                                   |
| ACAP1        | 0.951031363                            | N                                            | 2                                      | N                                   |
| AL121578.1   | 0.951031363                            | N                                            | 0                                      | N                                   |
| C9orf43      | 0.951031363                            | N                                            | 0                                      | N                                   |
| CNN2P4       | 0.951031363                            | N                                            | 0                                      | N                                   |
| CPHLIP       | 0.951031363                            | N                                            | 0                                      | N                                   |
| DPH6         | 0.951031363                            | N                                            | 0                                      | N                                   |
| FOXP4        | 0.951031363                            | N                                            | 2                                      | N                                   |
| GPR37        | 0.951031363                            | N                                            | 1                                      | N                                   |
| HMSD         | 0.951031363                            | N                                            | 0                                      | N                                   |
| ITGA7        | 0.951031363                            | N                                            | 2                                      | N                                   |
| KLF5         | 0.951031363                            | N                                            | 9                                      | N                                   |
| LYSMD2       | 0.951031363                            | N                                            | 0                                      | N                                   |
| NDUFAF4P1    | 0.951031363                            | N                                            | 0                                      | N                                   |
| NDUFB9P2     | 0.951031363                            | N                                            | 0                                      | N                                   |
| NEDD8-MDP1   | 0.951031363                            | N                                            | 0                                      | N                                   |
| PRR36        | 0.951031363                            | N                                            | 0                                      | N                                   |
| PTMS         | 0.951031363                            | N                                            | 42                                     | N                                   |
| PYCARD       | 0.951031363                            | N                                            | 12                                     | N                                   |
| RAB1B        | 0.951031363                            | N                                            | 1                                      | N                                   |
| RN7SKP231    | 0.951031363                            | N                                            | 0                                      | N                                   |
| RPS15AP10    | 0.951031363                            | N                                            | 0                                      | N                                   |
| U47924.2     | 0.951031363                            | N                                            | 0                                      | N                                   |
| WDR66        | 0.951031363                            | N                                            | 0                                      | N                                   |
| WDR73        | 0.951031363                            | N                                            | 0                                      | N                                   |
| AL596223.1   | 0.951032661                            | N                                            | 0                                      | N                                   |
| SEMA5A-AS1   | 0.951032661                            | N                                            | 0                                      | N                                   |
| AC027559.1   | 0.951154094                            | N                                            | 0                                      | N                                   |
| AL078581.1   | 0.951154094                            | N                                            | 0                                      | N                                   |
| DNAH12       | 0.951154094                            | N                                            | 0                                      | N                                   |
| RNF121       | 0.951243542                            | N                                            | 0                                      | N                                   |
| PPP2R5C      | 0.951280626                            | N                                            | 2                                      | N                                   |
| LINC00909    | 0.951324626                            | N                                            | 0                                      | N                                   |
| AARS         | 0.95134044                             | N                                            | 2                                      | N                                   |
| ABR          | 0.95134044                             | N                                            | 61                                     | N                                   |
| AC003681.1   | 0.95134044                             | N                                            | 0                                      | N                                   |
| AC004686.1   | 0.95134044                             | N                                            | 0                                      | N                                   |
| AC008735.1   | 0.95134044                             | N                                            | 0                                      | N                                   |
| AC011468.5   | 0.95134044                             | N                                            | 0                                      | N                                   |
| AC103591.1   | 0.95134044                             | N                                            | 0                                      | N                                   |
| AC105411.1   | 0.95134044                             | N                                            | 0                                      | N                                   |
| ADK          | 0.95134044                             | N                                            | 9                                      | N                                   |
| AL109804.1   | 0.95134044                             | N                                            | 0                                      | N                                   |
| AL357568.2   | 0.95134044                             | N                                            | 0                                      | N                                   |

| Gene symbols | FDR (differential expression analysis) | Differentially expressed gene? Y, Yes; N, No | Number of insulin related publications | Insulin related gene? Y, Yes; N, No |
|--------------|----------------------------------------|----------------------------------------------|----------------------------------------|-------------------------------------|
| AL391244.3   | 0.95134044                             | N                                            | 0                                      | N                                   |
| ALAD         | 0.95134044                             | N                                            | 2                                      | N                                   |
| C19orf73     | 0.95134044                             | N                                            | 0                                      | N                                   |
| CD59         | 0.95134044                             | N                                            | 20                                     | N                                   |
| CD63         | 0.95134044                             | N                                            | 18                                     | N                                   |
| CHD7         | 0.95134044                             | N                                            | 1                                      | N                                   |
| COBLL1       | 0.95134044                             | N                                            | 6                                      | N                                   |
| COQ8B        | 0.95134044                             | N                                            | 0                                      | N                                   |
| CTNND2       | 0.95134044                             | N                                            | 1                                      | N                                   |
| E2F6         | 0.95134044                             | N                                            | 0                                      | N                                   |
| EHHADH       | 0.95134044                             | N                                            | 4                                      | N                                   |
| ENAM         | 0.95134044                             | N                                            | 2                                      | N                                   |
| FGF18        | 0.95134044                             | N                                            | 8                                      | N                                   |
| FXR2         | 0.95134044                             | N                                            | 4                                      | N                                   |
| GALK2        | 0.95134044                             | N                                            | 0                                      | N                                   |
| GRIK4        | 0.95134044                             | N                                            | 1                                      | N                                   |
| HERC6        | 0.95134044                             | N                                            | 0                                      | N                                   |
| HESX1        | 0.95134044                             | N                                            | 10                                     | N                                   |
| IER5L        | 0.95134044                             | N                                            | 1                                      | N                                   |
| IRF5         | 0.95134044                             | N                                            | 8                                      | N                                   |
| LINC02012    | 0.95134044                             | N                                            | 0                                      | N                                   |
| LRRC37A15P   | 0.95134044                             | N                                            | 0                                      | N                                   |
| MCU          | 0.95134044                             | N                                            | 29                                     | N                                   |
| METTL7B      | 0.95134044                             | N                                            | 0                                      | N                                   |
| MGMT         | 0.95134044                             | N                                            | 17                                     | N                                   |
| MYO7B        | 0.95134044                             | N                                            | 0                                      | N                                   |
| NAA60        | 0.95134044                             | N                                            | 0                                      | N                                   |
| NACA3P       | 0.95134044                             | N                                            | 0                                      | N                                   |
| PFN2         | 0.95134044                             | N                                            | 1                                      | N                                   |
| RASSF9       | 0.95134044                             | N                                            | 0                                      | N                                   |
| RGMA         | 0.95134044                             | N                                            | 1                                      | N                                   |
| RN7SL141P    | 0.95134044                             | N                                            | 0                                      | N                                   |
| RPL32        | 0.95134044                             | N                                            | 3                                      | N                                   |
| RPS19        | 0.95134044                             | N                                            | 1                                      | N                                   |
| RPS3AP37     | 0.95134044                             | N                                            | 0                                      | N                                   |
| RTP5         | 0.95134044                             | N                                            | 0                                      | N                                   |
| SCG5         | 0.95134044                             | N                                            | 14                                     | N                                   |
| SLC25A1      | 0.95134044                             | N                                            | 4                                      | N                                   |
| SNORA26      | 0.95134044                             | N                                            | 0                                      | N                                   |
| TBC1D4       | 0.95134044                             | N                                            | 200                                    | Y                                   |
| TEPSIN       | 0.95134044                             | N                                            | 0                                      | N                                   |
| TMSB15B      | 0.95134044                             | N                                            | 0                                      | N                                   |
| TSPAN17      | 0.95134044                             | N                                            | 0                                      | N                                   |
| UAP1         | 0.95134044                             | N                                            | 0                                      | N                                   |
| USP12        | 0.95134044                             | N                                            | 0                                      | N                                   |
| WDR91        | 0.95134044                             | N                                            | 0                                      | N                                   |
| ZNF600       | 0.95134044                             | N                                            | 0                                      | N                                   |
| MLANA        | 0.95142984                             | N                                            | 1                                      | N                                   |
| TUBB3        | 0.95142984                             | N                                            | 5                                      | N                                   |
| AC104662.3   | 0.951443243                            | N                                            | 0                                      | N                                   |
| DUSP6        | 0.951443243                            | N                                            | 17                                     | N                                   |
| NUDT11       | 0.951443243                            | N                                            | 0                                      | N                                   |
| PHTF2        | 0.951461565                            | N                                            | 0                                      | N                                   |
| SMARCA4      | 0.951461565                            | N                                            | 4                                      | N                                   |
| AL606534.5   | 0.951504174                            | N                                            | 0                                      | N                                   |
| APIAR        | 0.951504174                            | N                                            | 0                                      | N                                   |
| CASP9        | 0.951504174                            | N                                            | 49                                     | N                                   |
| COMMD9       | 0.951504174                            | N                                            | 0                                      | N                                   |
| FAM217B      | 0.951504174                            | N                                            | 0                                      | N                                   |
| RPP25L       | 0.951504174                            | N                                            | 0                                      | N                                   |
| TMEM33       | 0.951504174                            | N                                            | 0                                      | N                                   |
| CCDC117      | 0.951579911                            | N                                            | 1                                      | N                                   |
| RFLNB        | 0.951579911                            | N                                            | 0                                      | N                                   |
| TMSB4Y       | 0.951579911                            | N                                            | 0                                      | N                                   |
| XRCC6P1      | 0.951579911                            | N                                            | 0                                      | N                                   |
| AC006547.1   | 0.951626442                            | N                                            | 0                                      | N                                   |

| Gene symbols  | FDR (differential expression analysis) | Differentially expressed gene? Y, Yes; N, No | Number of insulin related publications | Insulin related gene? Y, Yes; N, No |
|---------------|----------------------------------------|----------------------------------------------|----------------------------------------|-------------------------------------|
| CD109         | 0.951626442                            | N                                            | 0                                      | N                                   |
| TPCN2         | 0.951626442                            | N                                            | 8                                      | N                                   |
| ZNF770        | 0.951626442                            | N                                            | 0                                      | N                                   |
| CCT6P3        | 0.95163999                             | N                                            | 0                                      | N                                   |
| AC023512.1    | 0.951644872                            | N                                            | 0                                      | N                                   |
| INS-IGF2      | 0.951748111                            | N                                            | 28                                     | N                                   |
| SEPT8         | 0.951759501                            | N                                            | 0                                      | N                                   |
| AC005476.1    | 0.951759501                            | N                                            | 0                                      | N                                   |
| AC090739.1    | 0.951759501                            | N                                            | 0                                      | N                                   |
| AC126763.1    | 0.951759501                            | N                                            | 0                                      | N                                   |
| AL031055.1    | 0.951759501                            | N                                            | 0                                      | N                                   |
| BX322557.1    | 0.951759501                            | N                                            | 0                                      | N                                   |
| C19orf60      | 0.951759501                            | N                                            | 0                                      | N                                   |
| CYP4F3        | 0.951759501                            | N                                            | 0                                      | N                                   |
| DNAH9         | 0.951759501                            | N                                            | 0                                      | N                                   |
| ENPP4         | 0.951759501                            | N                                            | 0                                      | N                                   |
| GGT5          | 0.951759501                            | N                                            | 0                                      | N                                   |
| MTMR9         | 0.951759501                            | N                                            | 2                                      | N                                   |
| RP11-102K13.5 | 0.951759501                            | N                                            | 0                                      | N                                   |
| RP11-337C18.9 | 0.951759501                            | N                                            | 0                                      | N                                   |
| SALRNA3       | 0.951759501                            | N                                            | 0                                      | N                                   |
| SNORA14B      | 0.951759501                            | N                                            | 0                                      | N                                   |
| SULT1A3       | 0.951759501                            | N                                            | 1                                      | N                                   |
| USP2-AS1      | 0.951759501                            | N                                            | 0                                      | N                                   |
| CAGE1         | 0.951762769                            | N                                            | 0                                      | N                                   |
| AC117382.2    | 0.951812153                            | N                                            | 0                                      | N                                   |
| KCNT1         | 0.951812153                            | N                                            | 0                                      | N                                   |
| MALSU1        | 0.951812153                            | N                                            | 0                                      | N                                   |
| QARS          | 0.951812153                            | N                                            | 0                                      | N                                   |
| ZNF512B       | 0.951812153                            | N                                            | 0                                      | N                                   |
| AC018809.2    | 0.951899396                            | N                                            | 0                                      | N                                   |
| AC024909.3    | 0.951899396                            | N                                            | 0                                      | N                                   |
| AC026464.5    | 0.951899396                            | N                                            | 0                                      | N                                   |
| AC097374.1    | 0.951899396                            | N                                            | 0                                      | N                                   |
| AC112250.1    | 0.951899396                            | N                                            | 0                                      | N                                   |
| AL158154.2    | 0.951899396                            | N                                            | 0                                      | N                                   |
| AP001979.1    | 0.951899396                            | N                                            | 0                                      | N                                   |
| CHMP4BP1      | 0.951899396                            | N                                            | 0                                      | N                                   |
| FCAR          | 0.951899396                            | N                                            | 0                                      | N                                   |
| PCNPP3        | 0.951899396                            | N                                            | 0                                      | N                                   |
| RBM22         | 0.951899396                            | N                                            | 0                                      | N                                   |
| SLC25A14      | 0.951899396                            | N                                            | 7                                      | N                                   |
| SLC35C1       | 0.951899396                            | N                                            | 0                                      | N                                   |
| SSTR4         | 0.951899396                            | N                                            | 25                                     | N                                   |
| ZFP57         | 0.951899396                            | N                                            | 7                                      | N                                   |
| AL035252.3    | 0.952041845                            | N                                            | 0                                      | N                                   |
| AL358072.1    | 0.952041845                            | N                                            | 0                                      | N                                   |
| CES2          | 0.952041845                            | N                                            | 6                                      | N                                   |
| RAD17         | 0.952041845                            | N                                            | 1                                      | N                                   |
| AC012513.3    | 0.952332201                            | N                                            | 0                                      | N                                   |
| C17orf105     | 0.952332201                            | N                                            | 0                                      | N                                   |
| AC240504.1    | 0.952365508                            | N                                            | 0                                      | N                                   |
| C11orf74      | 0.952365508                            | N                                            | 0                                      | N                                   |
| RPS17         | 0.952375287                            | N                                            | 0                                      | N                                   |
| CROCCP3       | 0.952381655                            | N                                            | 0                                      | N                                   |
| LINC01004     | 0.952381655                            | N                                            | 0                                      | N                                   |
| TEX261        | 0.952381655                            | N                                            | 0                                      | N                                   |
| TMBIM4        | 0.952381655                            | N                                            | 0                                      | N                                   |
| STT3A         | 0.952505315                            | N                                            | 1                                      | N                                   |
| AC026412.1    | 0.952548001                            | N                                            | 0                                      | N                                   |
| TDRD1         | 0.952548001                            | N                                            | 1                                      | N                                   |
| SOBP          | 0.952685623                            | N                                            | 0                                      | N                                   |
| FBXL19        | 0.952786475                            | N                                            | 0                                      | N                                   |
| HEXIM1        | 0.952802554                            | N                                            | 2                                      | N                                   |
| PRKRA         | 0.952802554                            | N                                            | 0                                      | N                                   |
| PTGS1         | 0.952802554                            | N                                            | 33                                     | N                                   |

| Gene symbols | FDR (differential expression analysis) | Differentially expressed gene? Y, Yes; N, No | Number of insulin related publications | Insulin related gene? Y, Yes; N, No |
|--------------|----------------------------------------|----------------------------------------------|----------------------------------------|-------------------------------------|
| RPS26P21     | 0.952802554                            | N                                            | 0                                      | N                                   |
| PKMP5        | 0.952940283                            | N                                            | 0                                      | N                                   |
| PPP1R3E      | 0.952940283                            | N                                            | 1                                      | N                                   |
| SH3GL2       | 0.952940283                            | N                                            | 0                                      | N                                   |
| AL390719.1   | 0.953147257                            | N                                            | 0                                      | N                                   |
| AP000808.1   | 0.953289994                            | N                                            | 0                                      | N                                   |
| CLCN1        | 0.953289994                            | N                                            | 2                                      | N                                   |
| CUL4A        | 0.953289994                            | N                                            | 4                                      | N                                   |
| MPHOSPH10    | 0.953289994                            | N                                            | 1                                      | N                                   |
| RPS10P7      | 0.953289994                            | N                                            | 0                                      | N                                   |
| SRGAP2       | 0.953289994                            | N                                            | 1                                      | N                                   |
| TGFB1        | 0.953289994                            | N                                            | 272                                    | Y                                   |
| AP002518.1   | 0.953327653                            | N                                            | 0                                      | N                                   |
| SLC22A14     | 0.953327653                            | N                                            | 0                                      | N                                   |
| CISH         | 0.953342905                            | N                                            | 16                                     | N                                   |
| TMEM170A     | 0.953372377                            | N                                            | 0                                      | N                                   |
| PNPLA8       | 0.953417186                            | N                                            | 0                                      | N                                   |
| AC004584.3   | 0.95354345                             | N                                            | 0                                      | N                                   |
| AKAP8L       | 0.95354345                             | N                                            | 0                                      | N                                   |
| ATF4P3       | 0.95354345                             | N                                            | 0                                      | N                                   |
| IFI35        | 0.95354345                             | N                                            | 0                                      | N                                   |
| KCNJ2        | 0.95354345                             | N                                            | 2                                      | N                                   |
| MAP7D1       | 0.95354345                             | N                                            | 0                                      | N                                   |
| MPG          | 0.95354345                             | N                                            | 134                                    | Y                                   |
| RN7SL396P    | 0.95354345                             | N                                            | 0                                      | N                                   |
| SETDB1       | 0.95354345                             | N                                            | 1                                      | N                                   |
| SLC5A12      | 0.95354345                             | N                                            | 1                                      | N                                   |
| SYMPK        | 0.95354345                             | N                                            | 0                                      | N                                   |
| AC093627.4   | 0.95366296                             | N                                            | 0                                      | N                                   |
| AP1M2        | 0.95366296                             | N                                            | 0                                      | N                                   |
| PLEKHD1      | 0.95366296                             | N                                            | 0                                      | N                                   |
| FUNDC2P2     | 0.953665541                            | N                                            | 0                                      | N                                   |
| SHANK1       | 0.953665541                            | N                                            | 4                                      | N                                   |
| IFI27L1      | 0.953713738                            | N                                            | 0                                      | N                                   |
| PRKCZ-AS1    | 0.953713738                            | N                                            | 0                                      | N                                   |
| RN7SL371P    | 0.953713738                            | N                                            | 0                                      | N                                   |
| AC139099.4   | 0.953805285                            | N                                            | 0                                      | N                                   |
| AL021807.1   | 0.953805285                            | N                                            | 0                                      | N                                   |
| AL356258.1   | 0.953805285                            | N                                            | 0                                      | N                                   |
| AL627171.1   | 0.953805285                            | N                                            | 0                                      | N                                   |
| CTDP1        | 0.953805285                            | N                                            | 0                                      | N                                   |
| NENF         | 0.953805285                            | N                                            | 0                                      | N                                   |
| RN7SL735P    | 0.953805285                            | N                                            | 0                                      | N                                   |
| SIK3-IT1     | 0.953805285                            | N                                            | 0                                      | N                                   |
| VPS9D1-AS1   | 0.953805285                            | N                                            | 0                                      | N                                   |
| ADAMTS15     | 0.95389996                             | N                                            | 0                                      | N                                   |
| ZNF285       | 0.95389996                             | N                                            | 0                                      | N                                   |
| MTMR11       | 0.953912333                            | N                                            | 0                                      | N                                   |
| ABRAXAS1     | 0.953927189                            | N                                            | 0                                      | N                                   |
| AC005696.4   | 0.953927189                            | N                                            | 0                                      | N                                   |
| AC025857.2   | 0.953927189                            | N                                            | 0                                      | N                                   |
| GFM1         | 0.953927189                            | N                                            | 0                                      | N                                   |
| LINC02564    | 0.953927189                            | N                                            | 0                                      | N                                   |
| NANOGP5      | 0.953927189                            | N                                            | 0                                      | N                                   |
| TOR4A        | 0.953927189                            | N                                            | 0                                      | N                                   |
| AC025449.1   | 0.953982991                            | N                                            | 0                                      | N                                   |
| RALY-AS1     | 0.953982991                            | N                                            | 0                                      | N                                   |
| AC006064.1   | 0.953998395                            | N                                            | 0                                      | N                                   |
| AL442663.3   | 0.954037908                            | N                                            | 0                                      | N                                   |
| ADI1         | 0.954044636                            | N                                            | 0                                      | N                                   |
| ANKRD49      | 0.954044636                            | N                                            | 0                                      | N                                   |
| AC087741.3   | 0.954097745                            | N                                            | 0                                      | N                                   |
| AC104563.1   | 0.954097745                            | N                                            | 0                                      | N                                   |
| AL359715.4   | 0.954097745                            | N                                            | 0                                      | N                                   |
| C4orf48      | 0.954097745                            | N                                            | 0                                      | N                                   |
| FNDC10       | 0.954097745                            | N                                            | 0                                      | N                                   |

| Gene symbols | FDR (differential expression analysis) | Differentially expressed gene? Y, Yes; N, No | Number of insulin related publications | Insulin related gene? Y, Yes; N, No |
|--------------|----------------------------------------|----------------------------------------------|----------------------------------------|-------------------------------------|
| SETD3        | 0.954097745                            | N                                            | 0                                      | N                                   |
| TRPT1        | 0.954097745                            | N                                            | 0                                      | N                                   |
| ZNF295-AS1   | 0.954097745                            | N                                            | 0                                      | N                                   |
| BSN          | 0.954097834                            | N                                            | 8                                      | N                                   |
| AC110769.3   | 0.954120624                            | N                                            | 0                                      | N                                   |
| CNOT10       | 0.954128532                            | N                                            | 0                                      | N                                   |
| E2F3P2       | 0.954209158                            | N                                            | 0                                      | N                                   |
| SNORA71D     | 0.954209158                            | N                                            | 0                                      | N                                   |
| AC084783.1   | 0.954244199                            | N                                            | 0                                      | N                                   |
| LINC01715    | 0.954244199                            | N                                            | 0                                      | N                                   |
| AC091806.1   | 0.954252663                            | N                                            | 0                                      | N                                   |
| AC100774.1   | 0.954252663                            | N                                            | 0                                      | N                                   |
| AC137834.2   | 0.954252663                            | N                                            | 0                                      | N                                   |
| C1orf158     | 0.954252663                            | N                                            | 0                                      | N                                   |
| DDX31        | 0.954252663                            | N                                            | 0                                      | N                                   |
| DOCK2        | 0.954252663                            | N                                            | 2                                      | N                                   |
| MYZAP        | 0.954252663                            | N                                            | 0                                      | N                                   |
| NCF1         | 0.954252663                            | N                                            | 4                                      | N                                   |
| NFIB         | 0.954252663                            | N                                            | 9                                      | N                                   |
| PDCD7        | 0.954252663                            | N                                            | 0                                      | N                                   |
| PRUNE2       | 0.954252663                            | N                                            | 0                                      | N                                   |
| SLC1A2       | 0.954252663                            | N                                            | 10                                     | N                                   |
| SLC37A2      | 0.954252663                            | N                                            | 1                                      | N                                   |
| SPSB3        | 0.954252663                            | N                                            | 0                                      | N                                   |
| ZNF107       | 0.954252663                            | N                                            | 0                                      | N                                   |
| ATP5O        | 0.954391254                            | N                                            | 4                                      | N                                   |
| AC074091.1   | 0.954398272                            | N                                            | 0                                      | N                                   |
| AC244131.2   | 0.954398272                            | N                                            | 0                                      | N                                   |
| SOD1         | 0.954402619                            | N                                            | 159                                    | Y                                   |
| AC109458.1   | 0.954648941                            | N                                            | 0                                      | N                                   |
| CCDC188      | 0.954648941                            | N                                            | 0                                      | N                                   |
| CRTC1        | 0.954648941                            | N                                            | 36                                     | N                                   |
| TMEM209      | 0.954648941                            | N                                            | 0                                      | N                                   |
| GNAI2P1      | 0.954798115                            | N                                            | 0                                      | N                                   |
| LINC00895    | 0.954828916                            | N                                            | 0                                      | N                                   |
| LRP3         | 0.954932662                            | N                                            | 0                                      | N                                   |
| AC245052.5   | 0.955014378                            | N                                            | 0                                      | N                                   |
| AL390066.1   | 0.955014378                            | N                                            | 0                                      | N                                   |
| RNF144A      | 0.955028047                            | N                                            | 0                                      | N                                   |
| AC246787.1   | 0.955126249                            | N                                            | 0                                      | N                                   |
| B3GALT4      | 0.955189676                            | N                                            | 0                                      | N                                   |
| FLCN         | 0.955189676                            | N                                            | 2                                      | N                                   |
| MAGI2        | 0.955189676                            | N                                            | 0                                      | N                                   |
| AC007032.1   | 0.955199997                            | N                                            | 0                                      | N                                   |
| KDELC1P1     | 0.955199997                            | N                                            | 0                                      | N                                   |
| AC006001.3   | 0.955225788                            | N                                            | 0                                      | N                                   |
| AC007370.2   | 0.955225788                            | N                                            | 0                                      | N                                   |
| AC008021.1   | 0.955225788                            | N                                            | 0                                      | N                                   |
| DLG5         | 0.955225788                            | N                                            | 1                                      | N                                   |
| HES1         | 0.955225788                            | N                                            | 67                                     | N                                   |
| TMEM44       | 0.955225788                            | N                                            | 0                                      | N                                   |
| EDA          | 0.955230861                            | N                                            | 35                                     | N                                   |
| AC073488.1   | 0.955331714                            | N                                            | 0                                      | N                                   |
| AC074212.1   | 0.955331714                            | N                                            | 0                                      | N                                   |
| AC006028.1   | 0.955404829                            | N                                            | 0                                      | N                                   |
| AC040934.1   | 0.955520659                            | N                                            | 0                                      | N                                   |
| AC113367.1   | 0.955520659                            | N                                            | 0                                      | N                                   |
| AL021918.1   | 0.955520659                            | N                                            | 0                                      | N                                   |
| AL159153.1   | 0.955520659                            | N                                            | 0                                      | N                                   |
| LEMD2        | 0.955520659                            | N                                            | 0                                      | N                                   |
| RPS16P5      | 0.955520659                            | N                                            | 0                                      | N                                   |
| SBF1P1       | 0.955520659                            | N                                            | 0                                      | N                                   |
| SLC25A16     | 0.955520659                            | N                                            | 0                                      | N                                   |
| CYCSP23      | 0.955552145                            | N                                            | 0                                      | N                                   |
| AL157400.3   | 0.95562087                             | N                                            | 0                                      | N                                   |
| CCNT2-AS1    | 0.95562087                             | N                                            | 0                                      | N                                   |



| Gene symbols | FDR (differential expression analysis) | Differentially expressed gene? Y, Yes; N, No | Number of insulin related publications | Insulin related gene? Y, Yes; N, No |
|--------------|----------------------------------------|----------------------------------------------|----------------------------------------|-------------------------------------|
| CORO1C       | 0.95562087                             | N                                            | 0                                      | N                                   |
| DENND1A      | 0.95562087                             | N                                            | 11                                     | N                                   |
| FAM69B       | 0.95562087                             | N                                            | 0                                      | N                                   |
| RPS29P3      | 0.95562087                             | N                                            | 0                                      | N                                   |
| ZBTB40       | 0.95562087                             | N                                            | 0                                      | N                                   |
| DOCK8        | 0.955639689                            | N                                            | 1                                      | N                                   |
| KIAA0100     | 0.955639689                            | N                                            | 0                                      | N                                   |
| FNBP1P1      | 0.955679351                            | N                                            | 0                                      | N                                   |
| AC022075.1   | 0.955760809                            | N                                            | 0                                      | N                                   |
| EEF1DP5      | 0.955780605                            | N                                            | 0                                      | N                                   |
| EXOC5        | 0.955780605                            | N                                            | 1                                      | N                                   |
| MRI1         | 0.955792846                            | N                                            | 0                                      | N                                   |
| PKN2-AS1     | 0.955792846                            | N                                            | 0                                      | N                                   |
| AC005725.1   | 0.955840077                            | N                                            | 0                                      | N                                   |
| AC015712.6   | 0.955840077                            | N                                            | 0                                      | N                                   |
| AC019270.1   | 0.955840077                            | N                                            | 0                                      | N                                   |
| AC021086.1   | 0.955840077                            | N                                            | 0                                      | N                                   |
| AC022400.9   | 0.955840077                            | N                                            | 0                                      | N                                   |
| AC027287.1   | 0.955840077                            | N                                            | 0                                      | N                                   |
| AC105105.2   | 0.955840077                            | N                                            | 0                                      | N                                   |
| ACADS        | 0.955840077                            | N                                            | 7                                      | N                                   |
| ACTN2        | 0.955840077                            | N                                            | 3                                      | N                                   |
| AL049875.1   | 0.955840077                            | N                                            | 0                                      | N                                   |
| ALPK1        | 0.955840077                            | N                                            | 1                                      | N                                   |
| BRD7P4       | 0.955840077                            | N                                            | 0                                      | N                                   |
| CCDC140      | 0.955840077                            | N                                            | 0                                      | N                                   |
| CCDC151      | 0.955840077                            | N                                            | 0                                      | N                                   |
| COL7A1       | 0.955840077                            | N                                            | 0                                      | N                                   |
| DIRAS3       | 0.955840077                            | N                                            | 2                                      | N                                   |
| DIS3L2       | 0.955840077                            | N                                            | 3                                      | N                                   |
| GUCY1B3      | 0.955840077                            | N                                            | 1                                      | N                                   |
| IMPDH1P5     | 0.955840077                            | N                                            | 0                                      | N                                   |
| MBTPS1       | 0.955840077                            | N                                            | 1                                      | N                                   |
| MKKS         | 0.955840077                            | N                                            | 0                                      | N                                   |
| MMP12        | 0.955840077                            | N                                            | 10                                     | N                                   |
| NIFKP6       | 0.955840077                            | N                                            | 0                                      | N                                   |
| PDE7B        | 0.955840077                            | N                                            | 2                                      | N                                   |
| PPP1R1B      | 0.955840077                            | N                                            | 3                                      | N                                   |
| PRRT3        | 0.955840077                            | N                                            | 0                                      | N                                   |
| RARS         | 0.955840077                            | N                                            | 23                                     | N                                   |
| SNX8         | 0.955840077                            | N                                            | 1                                      | N                                   |
| SRM          | 0.955840077                            | N                                            | 63                                     | N                                   |
| STK39        | 0.955840077                            | N                                            | 8                                      | N                                   |
| SUSD1        | 0.955840077                            | N                                            | 0                                      | N                                   |
| TCTEX1D1     | 0.955840077                            | N                                            | 0                                      | N                                   |
| WAPL         | 0.955840077                            | N                                            | 0                                      | N                                   |
| AC073073.1   | 0.955862849                            | N                                            | 0                                      | N                                   |
| AC012512.1   | 0.956167884                            | N                                            | 0                                      | N                                   |
| AC016722.2   | 0.956167884                            | N                                            | 0                                      | N                                   |
| AC116337.1   | 0.956167884                            | N                                            | 0                                      | N                                   |
| BMS1         | 0.956167884                            | N                                            | 0                                      | N                                   |
| CTXN1        | 0.956167884                            | N                                            | 0                                      | N                                   |
| DNM1P35      | 0.956167884                            | N                                            | 0                                      | N                                   |
| GLRXP3       | 0.956167884                            | N                                            | 0                                      | N                                   |
| HGF          | 0.956167884                            | N                                            | 619                                    | Y                                   |
| TAF9BP1      | 0.956167884                            | N                                            | 0                                      | N                                   |
| TMCO3        | 0.956167884                            | N                                            | 0                                      | N                                   |
| ZNF394       | 0.956167884                            | N                                            | 0                                      | N                                   |
| ZBTB14       | 0.956189397                            | N                                            | 0                                      | N                                   |
| AL592076.1   | 0.956352576                            | N                                            | 0                                      | N                                   |
| AL671986.1   | 0.956352576                            | N                                            | 0                                      | N                                   |
| DVL2         | 0.956352576                            | N                                            | 3                                      | N                                   |
| SEC11A       | 0.956352576                            | N                                            | 0                                      | N                                   |
| YDJC         | 0.956352576                            | N                                            | 0                                      | N                                   |
| AC006059.1   | 0.956437418                            | N                                            | 0                                      | N                                   |
| TMSB15B      | 0.956437418                            | N                                            | 0                                      | N                                   |

| Gene symbols  | FDR (differential expression analysis) | Differentially expressed gene? Y, Yes; N, No | Number of insulin related publications | Insulin related gene? Y, Yes; N, No |
|---------------|----------------------------------------|----------------------------------------------|----------------------------------------|-------------------------------------|
| KCNIP4-IT1    | 0.956576039                            | N                                            | 0                                      | N                                   |
| ZBTB26        | 0.956656791                            | N                                            | 0                                      | N                                   |
| ADORA1        | 0.956684896                            | N                                            | 114                                    | Y                                   |
| AP000866.6    | 0.956684896                            | N                                            | 0                                      | N                                   |
| CAP1P2        | 0.956684896                            | N                                            | 0                                      | N                                   |
| LINC01121     | 0.956684896                            | N                                            | 0                                      | N                                   |
| SELENOS       | 0.956684896                            | N                                            | 6                                      | N                                   |
| SLC26A10      | 0.956684896                            | N                                            | 0                                      | N                                   |
| MCPH1         | 0.956782109                            | N                                            | 1                                      | N                                   |
| SULT1C4       | 0.956934825                            | N                                            | 0                                      | N                                   |
| AC004908.3    | 0.956963171                            | N                                            | 0                                      | N                                   |
| AC025031.2    | 0.956963171                            | N                                            | 0                                      | N                                   |
| DLST          | 0.956963171                            | N                                            | 2                                      | N                                   |
| RRN3          | 0.956963171                            | N                                            | 1                                      | N                                   |
| DDX19A        | 0.956968495                            | N                                            | 0                                      | N                                   |
| AC003102.2    | 0.957114244                            | N                                            | 0                                      | N                                   |
| AC011379.1    | 0.957114244                            | N                                            | 0                                      | N                                   |
| AC024896.1    | 0.957143346                            | N                                            | 0                                      | N                                   |
| AC083904.1    | 0.957157943                            | N                                            | 0                                      | N                                   |
| MAP3K12       | 0.957157943                            | N                                            | 0                                      | N                                   |
| AC009303.4    | 0.957345197                            | N                                            | 0                                      | N                                   |
| CCDC3         | 0.957345197                            | N                                            | 2                                      | N                                   |
| IQCB2P        | 0.957345197                            | N                                            | 0                                      | N                                   |
| MIOS          | 0.957345197                            | N                                            | 1                                      | N                                   |
| PLA2G15       | 0.957345197                            | N                                            | 0                                      | N                                   |
| AC027575.4    | 0.957397534                            | N                                            | 0                                      | N                                   |
| FBXO4         | 0.957397534                            | N                                            | 1                                      | N                                   |
| MAP3K6        | 0.957397534                            | N                                            | 0                                      | N                                   |
| MIR137HG      | 0.957397534                            | N                                            | 0                                      | N                                   |
| RPL22L1       | 0.957397534                            | N                                            | 0                                      | N                                   |
| SLC52A2       | 0.957397534                            | N                                            | 0                                      | N                                   |
| AC008750.8    | 0.957402627                            | N                                            | 0                                      | N                                   |
| GGT6          | 0.957402627                            | N                                            | 0                                      | N                                   |
| TUBA8         | 0.957469122                            | N                                            | 0                                      | N                                   |
| GXYLT1        | 0.95755                                | N                                            | 0                                      | N                                   |
| RNASEK        | 0.95756911                             | N                                            | 0                                      | N                                   |
| AL354733.2    | 0.957571347                            | N                                            | 0                                      | N                                   |
| FAM214B       | 0.957571347                            | N                                            | 0                                      | N                                   |
| LINC01436     | 0.957571347                            | N                                            | 0                                      | N                                   |
| MPIG6B        | 0.957571347                            | N                                            | 0                                      | N                                   |
| POTEF         | 0.957571347                            | N                                            | 0                                      | N                                   |
| ZNF20         | 0.957571347                            | N                                            | 0                                      | N                                   |
| ZRSR1         | 0.957571347                            | N                                            | 0                                      | N                                   |
| JMJD8         | 0.957612864                            | N                                            | 0                                      | N                                   |
| AC013472.3    | 0.957657382                            | N                                            | 0                                      | N                                   |
| ATF4P4        | 0.957657382                            | N                                            | 0                                      | N                                   |
| IPO7P2        | 0.957657382                            | N                                            | 0                                      | N                                   |
| AGAP2-AS1     | 0.957658992                            | N                                            | 0                                      | N                                   |
| AP002353.1    | 0.957658992                            | N                                            | 0                                      | N                                   |
| ATP5G2        | 0.957658992                            | N                                            | 3                                      | N                                   |
| LINC01836     | 0.957658992                            | N                                            | 0                                      | N                                   |
| PKMP4         | 0.957658992                            | N                                            | 0                                      | N                                   |
| SYDE1         | 0.957658992                            | N                                            | 0                                      | N                                   |
| TCF23         | 0.957658992                            | N                                            | 0                                      | N                                   |
| TMEM120A      | 0.957658992                            | N                                            | 0                                      | N                                   |
| VAMP3         | 0.957658992                            | N                                            | 40                                     | N                                   |
| RP11-346C20.4 | 0.957674425                            | N                                            | 0                                      | N                                   |
| AL512599.1    | 0.957700994                            | N                                            | 0                                      | N                                   |
| AC114271.1    | 0.957738369                            | N                                            | 0                                      | N                                   |
| LINC00957     | 0.957738369                            | N                                            | 0                                      | N                                   |
| THEM4         | 0.957738369                            | N                                            | 6                                      | N                                   |
| TRAPPC13      | 0.957738369                            | N                                            | 0                                      | N                                   |
| MYD88         | 0.957839356                            | N                                            | 123                                    | Y                                   |
| C1R           | 0.957965777                            | N                                            | 8                                      | N                                   |
| U91328.2      | 0.957985017                            | N                                            | 0                                      | N                                   |
| AF230666.2    | 0.958002692                            | N                                            | 0                                      | N                                   |

| Gene symbols | FDR (differential expression analysis) | Differentially expressed gene? Y, Yes; N, No | Number of insulin related publications | Insulin related gene? Y, Yes; N, No |
|--------------|----------------------------------------|----------------------------------------------|----------------------------------------|-------------------------------------|
| FAM104B      | 0.958002692                            | N                                            | 0                                      | N                                   |
| TGIF2        | 0.958002692                            | N                                            | 3                                      | N                                   |
| KB-1674E1.1  | 0.958140156                            | N                                            | 0                                      | N                                   |
| FAM110D      | 0.958163204                            | N                                            | 0                                      | N                                   |
| PLEKHA3      | 0.958163204                            | N                                            | 0                                      | N                                   |
| A1BG-AS1     | 0.958223511                            | N                                            | 0                                      | N                                   |
| ZNF525       | 0.958223511                            | N                                            | 0                                      | N                                   |
| AL136115.2   | 0.95835802                             | N                                            | 0                                      | N                                   |
| PLEKHH3      | 0.958388349                            | N                                            | 0                                      | N                                   |
| DIMT1        | 0.95839936                             | N                                            | 0                                      | N                                   |
| AC009065.4   | 0.958405677                            | N                                            | 0                                      | N                                   |
| LDLRAD2      | 0.958405677                            | N                                            | 0                                      | N                                   |
| PNMA2        | 0.958405677                            | N                                            | 0                                      | N                                   |
| AC011504.1   | 0.958447353                            | N                                            | 0                                      | N                                   |
| AC060766.3   | 0.958447353                            | N                                            | 0                                      | N                                   |
| AC073548.1   | 0.958447353                            | N                                            | 0                                      | N                                   |
| AC103746.1   | 0.958447353                            | N                                            | 0                                      | N                                   |
| AL136360.1   | 0.958447353                            | N                                            | 0                                      | N                                   |
| AL357054.4   | 0.958447353                            | N                                            | 0                                      | N                                   |
| AP002495.1   | 0.958447353                            | N                                            | 0                                      | N                                   |
| BACH1-IT2    | 0.958447353                            | N                                            | 0                                      | N                                   |
| C12orf29     | 0.958447353                            | N                                            | 0                                      | N                                   |
| CNPY2        | 0.958447353                            | N                                            | 0                                      | N                                   |
| DARS         | 0.958447353                            | N                                            | 1                                      | N                                   |
| DPY19L1P1    | 0.958447353                            | N                                            | 0                                      | N                                   |
| ECHDC1       | 0.958447353                            | N                                            | 1                                      | N                                   |
| EML3         | 0.958447353                            | N                                            | 0                                      | N                                   |
| FBLL1        | 0.958447353                            | N                                            | 0                                      | N                                   |
| FBXO33       | 0.958447353                            | N                                            | 0                                      | N                                   |
| FSCN1        | 0.958447353                            | N                                            | 1                                      | N                                   |
| JOSD2        | 0.958447353                            | N                                            | 0                                      | N                                   |
| LSP1         | 0.958447353                            | N                                            | 2                                      | N                                   |
| MEAF6P1      | 0.958447353                            | N                                            | 0                                      | N                                   |
| MRPL30       | 0.958447353                            | N                                            | 0                                      | N                                   |
| MRPS33P3     | 0.958447353                            | N                                            | 0                                      | N                                   |
| PANX2        | 0.958447353                            | N                                            | 4                                      | N                                   |
| PICART1      | 0.958447353                            | N                                            | 0                                      | N                                   |
| PROX1-AS1    | 0.958447353                            | N                                            | 0                                      | N                                   |
| PYGB         | 0.958447353                            | N                                            | 4                                      | N                                   |
| RUBCN        | 0.958447353                            | N                                            | 0                                      | N                                   |
| SNORD3B-1    | 0.958447353                            | N                                            | 0                                      | N                                   |
| SORBS3       | 0.958447353                            | N                                            | 2                                      | N                                   |
| SRFBP1       | 0.958447353                            | N                                            | 1                                      | N                                   |
| TEX264       | 0.958447353                            | N                                            | 0                                      | N                                   |
| USMG5P1      | 0.958447353                            | N                                            | 0                                      | N                                   |
| USP44        | 0.958447353                            | N                                            | 0                                      | N                                   |
| WTIP         | 0.958447353                            | N                                            | 0                                      | N                                   |
| ZNF317       | 0.958447353                            | N                                            | 0                                      | N                                   |
| SUMO2P17     | 0.958590269                            | N                                            | 0                                      | N                                   |
| SYNPO        | 0.958692779                            | N                                            | 1                                      | N                                   |
| BX539320.1   | 0.95879361                             | N                                            | 0                                      | N                                   |
| THAP12P7     | 0.95879361                             | N                                            | 0                                      | N                                   |
| ZNF850       | 0.958807189                            | N                                            | 0                                      | N                                   |
| AC067863.2   | 0.95897416                             | N                                            | 0                                      | N                                   |
| AC104667.1   | 0.95897416                             | N                                            | 0                                      | N                                   |
| AL355032.1   | 0.95897416                             | N                                            | 0                                      | N                                   |
| AL627309.5   | 0.95897416                             | N                                            | 0                                      | N                                   |
| ANKRD23      | 0.95897416                             | N                                            | 2                                      | N                                   |
| CTC1         | 0.95897416                             | N                                            | 0                                      | N                                   |
| ECT2L        | 0.95897416                             | N                                            | 0                                      | N                                   |
| ELN          | 0.95897416                             | N                                            | 9                                      | N                                   |
| INF2         | 0.95897416                             | N                                            | 1                                      | N                                   |
| KCNS3        | 0.95897416                             | N                                            | 0                                      | N                                   |
| PAPPA-AS2    | 0.95897416                             | N                                            | 0                                      | N                                   |
| PRKAA1       | 0.95897416                             | N                                            | 66                                     | N                                   |
| USP32P2      | 0.95897416                             | N                                            | 0                                      | N                                   |

| Gene symbols | FDR (differential expression analysis) | Differentially expressed gene? Y, Yes; N, No | Number of insulin related publications | Insulin related gene? Y, Yes; N, No |
|--------------|----------------------------------------|----------------------------------------------|----------------------------------------|-------------------------------------|
| ZNF732       | 0.95897416                             | N                                            | 0                                      | N                                   |
| RMND1        | 0.958980416                            | N                                            | 1                                      | N                                   |
| ACTBP12      | 0.958984296                            | N                                            | 0                                      | N                                   |
| AC024940.1   | 0.95902486                             | N                                            | 0                                      | N                                   |
| ADRB1        | 0.95902486                             | N                                            | 176                                    | Y                                   |
| ASB9         | 0.95902486                             | N                                            | 0                                      | N                                   |
| EML2         | 0.95902486                             | N                                            | 1                                      | N                                   |
| ERI3-IT1     | 0.95902486                             | N                                            | 0                                      | N                                   |
| MAP3K13      | 0.95902486                             | N                                            | 1                                      | N                                   |
| RBPMS        | 0.95902486                             | N                                            | 1                                      | N                                   |
| ROCK1P1      | 0.95902486                             | N                                            | 0                                      | N                                   |
| SFRP4        | 0.95902486                             | N                                            | 26                                     | N                                   |
| THAP12P8     | 0.95902486                             | N                                            | 0                                      | N                                   |
| TIMM9        | 0.95902486                             | N                                            | 1                                      | N                                   |
| AC016737.1   | 0.95904098                             | N                                            | 0                                      | N                                   |
| AC105446.1   | 0.959186293                            | N                                            | 0                                      | N                                   |
| PPP1R3A      | 0.959186293                            | N                                            | 19                                     | N                                   |
| RNPEPL1      | 0.959186293                            | N                                            | 0                                      | N                                   |
| SLC30A10     | 0.959186293                            | N                                            | 1                                      | N                                   |
| SNORA5A      | 0.959186293                            | N                                            | 0                                      | N                                   |
| PPP2R2C      | 0.959203271                            | N                                            | 1                                      | N                                   |
| ABHD5        | 0.959301689                            | N                                            | 27                                     | N                                   |
| AC009570.1   | 0.959301689                            | N                                            | 0                                      | N                                   |
| AC025470.1   | 0.959301689                            | N                                            | 0                                      | N                                   |
| ATP6V1E1     | 0.959301689                            | N                                            | 0                                      | N                                   |
| FAM105A      | 0.959301689                            | N                                            | 1                                      | N                                   |
| HTR1D        | 0.959301689                            | N                                            | 4                                      | N                                   |
| SCARNA10     | 0.959301689                            | N                                            | 0                                      | N                                   |
| AC087632.1   | 0.95942121                             | N                                            | 0                                      | N                                   |
| AC126755.1   | 0.959427645                            | N                                            | 0                                      | N                                   |
| TMEM253      | 0.959430656                            | N                                            | 0                                      | N                                   |
| AC098818.2   | 0.959552938                            | N                                            | 0                                      | N                                   |
| PIGO         | 0.959552938                            | N                                            | 1                                      | N                                   |
| SNORA38B     | 0.959552938                            | N                                            | 0                                      | N                                   |
| AC117503.4   | 0.959605814                            | N                                            | 0                                      | N                                   |
| ZNF670       | 0.959605814                            | N                                            | 0                                      | N                                   |
| AC009268.2   | 0.959611005                            | N                                            | 0                                      | N                                   |
| AC023830.3   | 0.959611005                            | N                                            | 0                                      | N                                   |
| AL022322.1   | 0.959611005                            | N                                            | 0                                      | N                                   |
| DPCD         | 0.959611005                            | N                                            | 0                                      | N                                   |
| DPH5         | 0.959611005                            | N                                            | 0                                      | N                                   |
| EPSTI1       | 0.959611005                            | N                                            | 0                                      | N                                   |
| FAM66A       | 0.959611005                            | N                                            | 0                                      | N                                   |
| HRK          | 0.959611005                            | N                                            | 8                                      | N                                   |
| KANK2        | 0.959611005                            | N                                            | 0                                      | N                                   |
| LDHA         | 0.959611005                            | N                                            | 31                                     | N                                   |
| RN7SL3       | 0.959611005                            | N                                            | 0                                      | N                                   |
| TRPV1        | 0.959611005                            | N                                            | 84                                     | N                                   |
| USHBP1       | 0.959611005                            | N                                            | 0                                      | N                                   |
| ZNF627       | 0.959611005                            | N                                            | 0                                      | N                                   |
| AC007620.2   | 0.959626638                            | N                                            | 0                                      | N                                   |
| AC093816.1   | 0.959626638                            | N                                            | 0                                      | N                                   |
| ERLIN2       | 0.959626638                            | N                                            | 1                                      | N                                   |
| IVNS1ABP     | 0.959626638                            | N                                            | 0                                      | N                                   |
| LINC02078    | 0.959626638                            | N                                            | 0                                      | N                                   |
| SNORA63C     | 0.959626638                            | N                                            | 0                                      | N                                   |
| AC026124.2   | 0.95970765                             | N                                            | 0                                      | N                                   |
| AC068792.1   | 0.95970765                             | N                                            | 0                                      | N                                   |
| AL139174.1   | 0.95970765                             | N                                            | 0                                      | N                                   |
| DNAJC5       | 0.95970765                             | N                                            | 0                                      | N                                   |
| GK           | 0.95970765                             | N                                            | 981                                    | Y                                   |
| SSTR1        | 0.95970765                             | N                                            | 60                                     | N                                   |
| ZNF410       | 0.95970765                             | N                                            | 1                                      | N                                   |
| AC079915.1   | 0.959749305                            | N                                            | 0                                      | N                                   |
| AC245100.2   | 0.959749305                            | N                                            | 0                                      | N                                   |
| AGO2         | 0.959749305                            | N                                            | 19                                     | N                                   |

| Gene symbols | FDR (differential expression analysis) | Differentially expressed gene? Y, Yes; N, No | Number of insulin related publications | Insulin related gene? Y, Yes; N, No |
|--------------|----------------------------------------|----------------------------------------------|----------------------------------------|-------------------------------------|
| AL121821.1   | 0.959749305                            | N                                            | 0                                      | N                                   |
| AL137246.1   | 0.959749305                            | N                                            | 0                                      | N                                   |
| APOL2        | 0.959749305                            | N                                            | 0                                      | N                                   |
| ARMC5        | 0.959749305                            | N                                            | 1                                      | N                                   |
| ARMC7        | 0.959749305                            | N                                            | 0                                      | N                                   |
| BACH2        | 0.959749305                            | N                                            | 8                                      | N                                   |
| CDON         | 0.959749305                            | N                                            | 0                                      | N                                   |
| FAM47E       | 0.959749305                            | N                                            | 0                                      | N                                   |
| FBXO22       | 0.959749305                            | N                                            | 0                                      | N                                   |
| FDX1         | 0.959749305                            | N                                            | 0                                      | N                                   |
| KDSR         | 0.959749305                            | N                                            | 0                                      | N                                   |
| METAP1       | 0.959749305                            | N                                            | 0                                      | N                                   |
| NCKAP1L      | 0.959749305                            | N                                            | 0                                      | N                                   |
| OR10Y1P      | 0.959749305                            | N                                            | 0                                      | N                                   |
| PIK3R1       | 0.959749305                            | N                                            | 85                                     | N                                   |
| PKD1         | 0.959749305                            | N                                            | 31                                     | N                                   |
| PKP4-AS1     | 0.959749305                            | N                                            | 0                                      | N                                   |
| RECQL5       | 0.959749305                            | N                                            | 0                                      | N                                   |
| RIT1         | 0.959749305                            | N                                            | 3                                      | N                                   |
| STK16        | 0.959749305                            | N                                            | 0                                      | N                                   |
| TPMT         | 0.959749305                            | N                                            | 0                                      | N                                   |
| UCK2         | 0.959749305                            | N                                            | 0                                      | N                                   |
| WDR24        | 0.959749305                            | N                                            | 0                                      | N                                   |
| ZNF236       | 0.959749305                            | N                                            | 0                                      | N                                   |
| AC012640.4   | 0.959755835                            | N                                            | 0                                      | N                                   |
| SS18L1       | 0.959760904                            | N                                            | 1                                      | N                                   |
| SAV1         | 0.959763836                            | N                                            | 3                                      | N                                   |
| KCNH7        | 0.95976794                             | N                                            | 0                                      | N                                   |
| RN7SL300P    | 0.95976794                             | N                                            | 0                                      | N                                   |
| AL139220.2   | 0.959796988                            | N                                            | 0                                      | N                                   |
| CAMK2B       | 0.959796988                            | N                                            | 5                                      | N                                   |
| AC090587.2   | 0.959865009                            | N                                            | 0                                      | N                                   |
| AC006120.1   | 0.959942746                            | N                                            | 0                                      | N                                   |
| CHMP2A       | 0.959942746                            | N                                            | 0                                      | N                                   |
| GEMIN7       | 0.959942746                            | N                                            | 0                                      | N                                   |
| LPAR5        | 0.959942746                            | N                                            | 1                                      | N                                   |
| TMEM81       | 0.959942746                            | N                                            | 0                                      | N                                   |
| DUSP23       | 0.960151266                            | N                                            | 0                                      | N                                   |
| AP003119.3   | 0.960193596                            | N                                            | 0                                      | N                                   |
| KCND3        | 0.960214153                            | N                                            | 2                                      | N                                   |
| LINC01465    | 0.960313638                            | N                                            | 0                                      | N                                   |
| AC007192.1   | 0.960325855                            | N                                            | 0                                      | N                                   |
| AC012181.2   | 0.960325855                            | N                                            | 0                                      | N                                   |
| C6orf106     | 0.960325855                            | N                                            | 0                                      | N                                   |
| NDUFA13      | 0.960325855                            | N                                            | 2                                      | N                                   |
| SNHG16       | 0.960325855                            | N                                            | 0                                      | N                                   |
| SNORA31      | 0.960325855                            | N                                            | 0                                      | N                                   |
| TMCC1-AS1    | 0.960325855                            | N                                            | 0                                      | N                                   |
| TMSB4X       | 0.960325855                            | N                                            | 0                                      | N                                   |
| ZNF239       | 0.960325855                            | N                                            | 0                                      | N                                   |
| CLSTN2       | 0.960389875                            | N                                            | 1                                      | N                                   |
| ABCB7        | 0.96042543                             | N                                            | 0                                      | N                                   |
| AC005479.1   | 0.96042543                             | N                                            | 0                                      | N                                   |
| AC025283.2   | 0.96042543                             | N                                            | 0                                      | N                                   |
| AC105235.1   | 0.96042543                             | N                                            | 0                                      | N                                   |
| AC109322.1   | 0.96042543                             | N                                            | 0                                      | N                                   |
| AC244517.4   | 0.96042543                             | N                                            | 0                                      | N                                   |
| AGPAT2       | 0.96042543                             | N                                            | 52                                     | N                                   |
| AL135925.1   | 0.96042543                             | N                                            | 0                                      | N                                   |
| AP000640.1   | 0.96042543                             | N                                            | 0                                      | N                                   |
| CHD3         | 0.96042543                             | N                                            | 0                                      | N                                   |
| COX6B1P1     | 0.96042543                             | N                                            | 0                                      | N                                   |
| FOSL1P1      | 0.96042543                             | N                                            | 0                                      | N                                   |
| HSF2         | 0.96042543                             | N                                            | 1                                      | N                                   |
| IRF8         | 0.96042543                             | N                                            | 2                                      | N                                   |
| LINC00824    | 0.96042543                             | N                                            | 0                                      | N                                   |

| Gene symbols | FDR (differential expression analysis) | Differentially expressed gene? Y, Yes; N, No | Number of insulin related publications | Insulin related gene? Y, Yes; N, No |
|--------------|----------------------------------------|----------------------------------------------|----------------------------------------|-------------------------------------|
| MAPK8IP2     | 0.96042543                             | N                                            | 3                                      | N                                   |
| MAT2B        | 0.96042543                             | N                                            | 2                                      | N                                   |
| NMD3P1       | 0.96042543                             | N                                            | 0                                      | N                                   |
| OAS3         | 0.96042543                             | N                                            | 1                                      | N                                   |
| PCNX3        | 0.96042543                             | N                                            | 0                                      | N                                   |
| PRRC2A       | 0.96042543                             | N                                            | 1                                      | N                                   |
| PTER         | 0.96042543                             | N                                            | 10                                     | N                                   |
| SH3GL1       | 0.96042543                             | N                                            | 1                                      | N                                   |
| SLC47A1      | 0.96042543                             | N                                            | 3                                      | N                                   |
| SPOP         | 0.96042543                             | N                                            | 4                                      | N                                   |
| STARD9       | 0.96042543                             | N                                            | 0                                      | N                                   |
| TSEN15P1     | 0.96042543                             | N                                            | 0                                      | N                                   |
| TTN-AS1      | 0.96042543                             | N                                            | 0                                      | N                                   |
| ZBED5-AS1    | 0.96042543                             | N                                            | 0                                      | N                                   |
| ZBTB8A       | 0.96042543                             | N                                            | 0                                      | N                                   |
| PPP3CB-AS1   | 0.96049634                             | N                                            | 0                                      | N                                   |
| UBE2K        | 0.96049634                             | N                                            | 0                                      | N                                   |
| AC091152.1   | 0.960518237                            | N                                            | 0                                      | N                                   |
| DLGAP2       | 0.960518237                            | N                                            | 4                                      | N                                   |
| ZNF207       | 0.960546685                            | N                                            | 0                                      | N                                   |
| ZNF365       | 0.960573762                            | N                                            | 0                                      | N                                   |
| AL096865.1   | 0.960592328                            | N                                            | 0                                      | N                                   |
| PPP6R2       | 0.960592328                            | N                                            | 0                                      | N                                   |
| SEC61A2      | 0.960592328                            | N                                            | 1                                      | N                                   |
| AC105399.1   | 0.960611902                            | N                                            | 0                                      | N                                   |
| FSCN2        | 0.960611902                            | N                                            | 0                                      | N                                   |
| AC241584.1   | 0.960690415                            | N                                            | 0                                      | N                                   |
| ABCB6        | 0.960723478                            | N                                            | 1                                      | N                                   |
| AC005255.1   | 0.960723478                            | N                                            | 0                                      | N                                   |
| AL139011.2   | 0.960723478                            | N                                            | 0                                      | N                                   |
| AL590822.2   | 0.960723478                            | N                                            | 0                                      | N                                   |
| BCL2L2       | 0.960723478                            | N                                            | 2                                      | N                                   |
| CYP2D6       | 0.960723478                            | N                                            | 30                                     | N                                   |
| GNPNAT1      | 0.960723478                            | N                                            | 2                                      | N                                   |
| RTKN         | 0.960723478                            | N                                            | 0                                      | N                                   |
| USMG5        | 0.960745009                            | N                                            | 5                                      | N                                   |
| AC005412.2   | 0.96087041                             | N                                            | 0                                      | N                                   |
| NAPSA        | 0.960886139                            | N                                            | 0                                      | N                                   |
| NOV          | 0.960886139                            | N                                            | 1000                                   | Y                                   |
| TRIM35       | 0.960886139                            | N                                            | 0                                      | N                                   |
| CCDC114      | 0.960964353                            | N                                            | 0                                      | N                                   |
| PDLIM2       | 0.960964353                            | N                                            | 4                                      | N                                   |
| SMG8         | 0.960964353                            | N                                            | 0                                      | N                                   |
| RDH16        | 0.96096969                             | N                                            | 2                                      | N                                   |
| ZNF845       | 0.96096969                             | N                                            | 0                                      | N                                   |
| AC022558.3   | 0.960983204                            | N                                            | 0                                      | N                                   |
| AC104763.1   | 0.960983204                            | N                                            | 0                                      | N                                   |
| ALG1L2       | 0.960983204                            | N                                            | 0                                      | N                                   |
| CHST6        | 0.960983204                            | N                                            | 0                                      | N                                   |
| LZIC         | 0.960983204                            | N                                            | 0                                      | N                                   |
| RPS18        | 0.960983204                            | N                                            | 0                                      | N                                   |
| SDK2         | 0.960983204                            | N                                            | 0                                      | N                                   |
| ZNF3         | 0.960983204                            | N                                            | 0                                      | N                                   |
| DCUN1D1      | 0.960997584                            | N                                            | 0                                      | N                                   |
| ENO2         | 0.960997584                            | N                                            | 4                                      | N                                   |
| GCOM2        | 0.960997584                            | N                                            | 0                                      | N                                   |
| IFNWP19      | 0.960997584                            | N                                            | 0                                      | N                                   |
| PRKAR2A      | 0.960997584                            | N                                            | 4                                      | N                                   |
| RARB         | 0.960997584                            | N                                            | 2                                      | N                                   |
| SLC25A32     | 0.960997584                            | N                                            | 0                                      | N                                   |
| ZNF182       | 0.960997584                            | N                                            | 0                                      | N                                   |
| AC114324.2   | 0.961045214                            | N                                            | 0                                      | N                                   |
| AC136601.2   | 0.961045214                            | N                                            | 0                                      | N                                   |
| AC005498.3   | 0.961061222                            | N                                            | 0                                      | N                                   |
| RALGDS       | 0.961061222                            | N                                            | 16                                     | N                                   |
| SMAP2        | 0.961061222                            | N                                            | 0                                      | N                                   |

| Gene symbols | FDR (differential expression analysis) | Differentially expressed gene? Y, Yes; N, No | Number of insulin related publications | Insulin related gene? Y, Yes; N, No |
|--------------|----------------------------------------|----------------------------------------------|----------------------------------------|-------------------------------------|
| AC041040.1   | 0.961079363                            | N                                            | 0                                      | N                                   |
| CELF5        | 0.961098802                            | N                                            | 0                                      | N                                   |
| AKR1A1       | 0.961171555                            | N                                            | 1                                      | N                                   |
| HIVEP3       | 0.961312978                            | N                                            | 0                                      | N                                   |
| KLHL20       | 0.961312978                            | N                                            | 0                                      | N                                   |
| ZNF597       | 0.961312978                            | N                                            | 0                                      | N                                   |
| ARID1A       | 0.961337654                            | N                                            | 5                                      | N                                   |
| C5orf22      | 0.961337654                            | N                                            | 0                                      | N                                   |
| HS3ST6       | 0.961337654                            | N                                            | 0                                      | N                                   |
| IARS2        | 0.961337654                            | N                                            | 0                                      | N                                   |
| ITGA2        | 0.961337654                            | N                                            | 5                                      | N                                   |
| SHISA5       | 0.961337654                            | N                                            | 0                                      | N                                   |
| SOX15        | 0.961337654                            | N                                            | 1                                      | N                                   |
| XPNPPE2      | 0.961337654                            | N                                            | 0                                      | N                                   |
| AC009053.1   | 0.96162083                             | N                                            | 0                                      | N                                   |
| AGFG1        | 0.96162083                             | N                                            | 2                                      | N                                   |
| IGSF9        | 0.96162083                             | N                                            | 0                                      | N                                   |
| RN7SL525P    | 0.96162083                             | N                                            | 0                                      | N                                   |
| CLYBL        | 0.961685921                            | N                                            | 0                                      | N                                   |
| AL160408.1   | 0.96172886                             | N                                            | 0                                      | N                                   |
| C19orf44     | 0.96172886                             | N                                            | 0                                      | N                                   |
| C19orf70     | 0.96172886                             | N                                            | 0                                      | N                                   |
| CHI3L2       | 0.96172886                             | N                                            | 3                                      | N                                   |
| FOSB         | 0.96172886                             | N                                            | 19                                     | N                                   |
| MTOR         | 0.96172886                             | N                                            | 1000                                   | Y                                   |
| YBX1P10      | 0.96172886                             | N                                            | 0                                      | N                                   |
| CHST1        | 0.961804821                            | N                                            | 0                                      | N                                   |
| GPRASP1      | 0.9619053                              | N                                            | 0                                      | N                                   |
| AC009269.6   | 0.961927518                            | N                                            | 0                                      | N                                   |
| LINC01419    | 0.961955789                            | N                                            | 0                                      | N                                   |
| AC079354.1   | 0.961994457                            | N                                            | 0                                      | N                                   |
| ACTRT3       | 0.961994457                            | N                                            | 0                                      | N                                   |
| AL596220.1   | 0.961994457                            | N                                            | 0                                      | N                                   |
| LDHAL6CP     | 0.961994457                            | N                                            | 0                                      | N                                   |
| PRR19        | 0.961994457                            | N                                            | 0                                      | N                                   |
| SIGLEC10     | 0.961994457                            | N                                            | 0                                      | N                                   |
| PNMA1        | 0.962028294                            | N                                            | 0                                      | N                                   |
| AL663058.1   | 0.962045717                            | N                                            | 0                                      | N                                   |
| FAM20C       | 0.962095789                            | N                                            | 2                                      | N                                   |
| LINC01662    | 0.962095789                            | N                                            | 0                                      | N                                   |
| TMEM200A     | 0.962095789                            | N                                            | 0                                      | N                                   |
| AL356277.3   | 0.962138398                            | N                                            | 0                                      | N                                   |
| SMIM20       | 0.962138398                            | N                                            | 0                                      | N                                   |
| ADIPOR1      | 0.962450202                            | N                                            | 404                                    | Y                                   |
| SNORA37      | 0.962450202                            | N                                            | 0                                      | N                                   |
| AC011462.4   | 0.9624996                              | N                                            | 0                                      | N                                   |
| NOC4L        | 0.96254402                             | N                                            | 0                                      | N                                   |
| AC008080.1   | 0.962597843                            | N                                            | 0                                      | N                                   |
| IAH1         | 0.962601323                            | N                                            | 0                                      | N                                   |
| PRR7         | 0.962746086                            | N                                            | 0                                      | N                                   |
| TEX36        | 0.962747217                            | N                                            | 0                                      | N                                   |
| PPP1R12A-AS1 | 0.962777461                            | N                                            | 0                                      | N                                   |
| RPL10        | 0.962777461                            | N                                            | 0                                      | N                                   |
| UBE2Q2P2     | 0.962819699                            | N                                            | 0                                      | N                                   |
| SEMA7A       | 0.962836196                            | N                                            | 0                                      | N                                   |
| AC011773.3   | 0.96287751                             | N                                            | 0                                      | N                                   |
| ER13         | 0.96287751                             | N                                            | 0                                      | N                                   |
| GNL3         | 0.96287751                             | N                                            | 0                                      | N                                   |
| POU5F1       | 0.96287751                             | N                                            | 51                                     | N                                   |
| ARSE         | 0.962890226                            | N                                            | 0                                      | N                                   |
| AC104532.2   | 0.962932925                            | N                                            | 0                                      | N                                   |
| AL139094.1   | 0.962932925                            | N                                            | 0                                      | N                                   |
| PMS2P10      | 0.962932925                            | N                                            | 0                                      | N                                   |
| MFNG         | 0.962943502                            | N                                            | 0                                      | N                                   |
| RNF215       | 0.962943502                            | N                                            | 0                                      | N                                   |
| IGF2         | 0.962944907                            | N                                            | 1000                                   | Y                                   |

| Gene symbols | FDR (differential expression analysis) | Differentially expressed gene? Y, Yes; N, No | Number of insulin related publications | Insulin related gene? Y, Yes; N, No |
|--------------|----------------------------------------|----------------------------------------------|----------------------------------------|-------------------------------------|
| COL6A3       | 0.962987214                            | N                                            | 11                                     | N                                   |
| TRMT44       | 0.962987214                            | N                                            | 0                                      | N                                   |
| CIC          | 0.963005151                            | N                                            | 167                                    | Y                                   |
| RAB1C        | 0.963005151                            | N                                            | 0                                      | N                                   |
| ZNF644       | 0.963032395                            | N                                            | 0                                      | N                                   |
| STX8P1       | 0.963074982                            | N                                            | 0                                      | N                                   |
| AC005261.6   | 0.963224602                            | N                                            | 0                                      | N                                   |
| ASH2LP2      | 0.963224602                            | N                                            | 0                                      | N                                   |
| BCL7B        | 0.963224602                            | N                                            | 1                                      | N                                   |
| PIEZO1       | 0.963224602                            | N                                            | 4                                      | N                                   |
| ZNF721       | 0.963449381                            | N                                            | 0                                      | N                                   |
| MOBP         | 0.963463812                            | N                                            | 0                                      | N                                   |
| AC007750.1   | 0.963502492                            | N                                            | 0                                      | N                                   |
| AC012645.2   | 0.963502492                            | N                                            | 0                                      | N                                   |
| CLCN4        | 0.963502492                            | N                                            | 0                                      | N                                   |
| MAPK10       | 0.963675096                            | N                                            | 5                                      | N                                   |
| AC002128.1   | 0.963768913                            | N                                            | 0                                      | N                                   |
| CHERP        | 0.963768913                            | N                                            | 0                                      | N                                   |
| COTL1        | 0.963768913                            | N                                            | 0                                      | N                                   |
| RPGRIP1L     | 0.963768913                            | N                                            | 2                                      | N                                   |
| FAM35A       | 0.963773048                            | N                                            | 0                                      | N                                   |
| FAM92A1P1    | 0.96378474                             | N                                            | 0                                      | N                                   |
| HMOX1        | 0.96378474                             | N                                            | 324                                    | Y                                   |
| SLC12A9      | 0.96378474                             | N                                            | 0                                      | N                                   |
| AC104024.2   | 0.963808504                            | N                                            | 0                                      | N                                   |
| HMG5         | 0.963863812                            | N                                            | 2                                      | N                                   |
| PPIB         | 0.963863812                            | N                                            | 3                                      | N                                   |
| WNT2B        | 0.963863812                            | N                                            | 1                                      | N                                   |
| AC090373.1   | 0.963968413                            | N                                            | 0                                      | N                                   |
| AC107214.1   | 0.963968413                            | N                                            | 0                                      | N                                   |
| FIBP         | 0.963968413                            | N                                            | 0                                      | N                                   |
| MYOM2        | 0.963968413                            | N                                            | 0                                      | N                                   |
| TAX1BP3      | 0.963968413                            | N                                            | 7                                      | N                                   |
| PLEKHH2      | 0.963998729                            | N                                            | 0                                      | N                                   |
| SCNN1A       | 0.964266002                            | N                                            | 3                                      | N                                   |
| PCAT29       | 0.96432017                             | N                                            | 0                                      | N                                   |
| ZNF214       | 0.96432017                             | N                                            | 2                                      | N                                   |
| AC015813.4   | 0.964349129                            | N                                            | 0                                      | N                                   |
| AL353572.2   | 0.964349129                            | N                                            | 0                                      | N                                   |
| PLXNA2       | 0.964349129                            | N                                            | 1                                      | N                                   |
| AC005041.1   | 0.964391858                            | N                                            | 0                                      | N                                   |
| AC073621.1   | 0.964391858                            | N                                            | 0                                      | N                                   |
| AC079298.2   | 0.964391858                            | N                                            | 0                                      | N                                   |
| GALNT5       | 0.964391858                            | N                                            | 0                                      | N                                   |
| LINC02104    | 0.964391858                            | N                                            | 0                                      | N                                   |
| RN7SKP56     | 0.964391858                            | N                                            | 0                                      | N                                   |
| FAM21FP      | 0.964422481                            | N                                            | 0                                      | N                                   |
| CAPN12       | 0.964423806                            | N                                            | 0                                      | N                                   |
| AC011815.1   | 0.96463791                             | N                                            | 0                                      | N                                   |
| AC068491.3   | 0.96463791                             | N                                            | 0                                      | N                                   |
| AC116359.1   | 0.96463791                             | N                                            | 0                                      | N                                   |
| HDAC7        | 0.96463791                             | N                                            | 6                                      | N                                   |
| SNX14        | 0.964752653                            | N                                            | 0                                      | N                                   |
| AC048338.2   | 0.964811107                            | N                                            | 0                                      | N                                   |
| AL022326.1   | 0.964811107                            | N                                            | 0                                      | N                                   |
| AL357552.2   | 0.964811107                            | N                                            | 0                                      | N                                   |
| CEACAMP10    | 0.964811107                            | N                                            | 0                                      | N                                   |
| CEP295NL     | 0.964811107                            | N                                            | 0                                      | N                                   |
| DCAF13P1     | 0.964811107                            | N                                            | 0                                      | N                                   |
| DGKQ         | 0.964811107                            | N                                            | 0                                      | N                                   |
| KIF27        | 0.964811107                            | N                                            | 0                                      | N                                   |
| LIN7B        | 0.964811107                            | N                                            | 1                                      | N                                   |
| NPAT         | 0.964811107                            | N                                            | 0                                      | N                                   |
| PSMB8        | 0.964811107                            | N                                            | 3                                      | N                                   |
| RIMKLBP1     | 0.964811107                            | N                                            | 0                                      | N                                   |
| SMARCC1      | 0.964811107                            | N                                            | 1                                      | N                                   |



| Gene symbols | FDR (differential expression analysis) | Differentially expressed gene? Y, Yes; N, No | Number of insulin related publications | Insulin related gene? Y, Yes; N, No |
|--------------|----------------------------------------|----------------------------------------------|----------------------------------------|-------------------------------------|
| AC008906.1   | 0.964954865                            | N                                            | 0                                      | N                                   |
| SETP6        | 0.964954865                            | N                                            | 0                                      | N                                   |
| KLHL21       | 0.96501122                             | N                                            | 0                                      | N                                   |
| AL133410.1   | 0.965062291                            | N                                            | 0                                      | N                                   |
| ZNF566       | 0.965062291                            | N                                            | 0                                      | N                                   |
| AC105339.2   | 0.965096562                            | N                                            | 0                                      | N                                   |
| ACTR6        | 0.965096562                            | N                                            | 0                                      | N                                   |
| METTL15      | 0.965096562                            | N                                            | 0                                      | N                                   |
| AC241585.2   | 0.965125944                            | N                                            | 0                                      | N                                   |
| KCNQ5        | 0.965125944                            | N                                            | 1                                      | N                                   |
| AC010615.2   | 0.965209277                            | N                                            | 0                                      | N                                   |
| AC048338.1   | 0.965209277                            | N                                            | 0                                      | N                                   |
| TMEM105      | 0.965209277                            | N                                            | 0                                      | N                                   |
| AC006116.2   | 0.965237086                            | N                                            | 0                                      | N                                   |
| AL136295.6   | 0.965284125                            | N                                            | 0                                      | N                                   |
| C2CD2L       | 0.965284125                            | N                                            | 2                                      | N                                   |
| FOXP2        | 0.965284125                            | N                                            | 2                                      | N                                   |
| GMDS         | 0.965284125                            | N                                            | 4                                      | N                                   |
| MTHFS        | 0.965284125                            | N                                            | 1                                      | N                                   |
| PRKCSH       | 0.965284125                            | N                                            | 4                                      | N                                   |
| TMEM30A      | 0.965284125                            | N                                            | 2                                      | N                                   |
| UBC          | 0.965284125                            | N                                            | 222                                    | Y                                   |
| ZNF354C      | 0.965284125                            | N                                            | 1                                      | N                                   |
| AC092447.5   | 0.965308909                            | N                                            | 0                                      | N                                   |
| AP003170.1   | 0.965500092                            | N                                            | 0                                      | N                                   |
| AL450306.1   | 0.965528991                            | N                                            | 0                                      | N                                   |
| C3AR1        | 0.965528991                            | N                                            | 1                                      | N                                   |
| CLNS1A       | 0.965528991                            | N                                            | 1                                      | N                                   |
| HERC2P4      | 0.965528991                            | N                                            | 0                                      | N                                   |
| NUPL2        | 0.965528991                            | N                                            | 0                                      | N                                   |
| RAC2         | 0.965528991                            | N                                            | 8                                      | N                                   |
| RASSF1-AS1   | 0.965528991                            | N                                            | 0                                      | N                                   |
| RPL22P13     | 0.965528991                            | N                                            | 0                                      | N                                   |
| AC005104.2   | 0.965608834                            | N                                            | 0                                      | N                                   |
| AL592148.1   | 0.965610741                            | N                                            | 0                                      | N                                   |
| AC010619.2   | 0.965617142                            | N                                            | 0                                      | N                                   |
| LINC01687    | 0.965617142                            | N                                            | 0                                      | N                                   |
| SLC26A7      | 0.965617142                            | N                                            | 1                                      | N                                   |
| HK1          | 0.965679367                            | N                                            | 27                                     | N                                   |
| AC127024.8   | 0.965684317                            | N                                            | 0                                      | N                                   |
| AL590617.2   | 0.965684317                            | N                                            | 0                                      | N                                   |
| CHRNA2       | 0.965684317                            | N                                            | 0                                      | N                                   |
| MKX          | 0.965684317                            | N                                            | 0                                      | N                                   |
| NDUFB3       | 0.965684317                            | N                                            | 2                                      | N                                   |
| PHLDA3       | 0.965684317                            | N                                            | 2                                      | N                                   |
| SDC1         | 0.965707135                            | N                                            | 18                                     | N                                   |
| ARHGAP30     | 0.965811748                            | N                                            | 0                                      | N                                   |
| B3GAT3       | 0.965811748                            | N                                            | 0                                      | N                                   |
| BICDL2       | 0.965811748                            | N                                            | 0                                      | N                                   |
| SYT14P1      | 0.96593855                             | N                                            | 0                                      | N                                   |
| USP35        | 0.965971587                            | N                                            | 0                                      | N                                   |
| UCHL3        | 0.965994083                            | N                                            | 3                                      | N                                   |
| CHURC1-FNTB  | 0.966086872                            | N                                            | 0                                      | N                                   |
| CDR1         | 0.966088404                            | N                                            | 4                                      | N                                   |
| MVD          | 0.966088404                            | N                                            | 41                                     | N                                   |
| OXR1         | 0.966088404                            | N                                            | 5                                      | N                                   |
| ZNF311       | 0.966088404                            | N                                            | 0                                      | N                                   |
| AC096772.1   | 0.966090953                            | N                                            | 0                                      | N                                   |
| AL590617.1   | 0.966090953                            | N                                            | 0                                      | N                                   |
| COX5B        | 0.966090953                            | N                                            | 4                                      | N                                   |
| CTA-732E4.1  | 0.966090953                            | N                                            | 0                                      | N                                   |
| DENND2A      | 0.966090953                            | N                                            | 0                                      | N                                   |
| EIF1B        | 0.966090953                            | N                                            | 0                                      | N                                   |
| RNF152       | 0.966090953                            | N                                            | 0                                      | N                                   |
| ZXDA         | 0.966090953                            | N                                            | 0                                      | N                                   |
| AC005076.1   | 0.966153359                            | N                                            | 0                                      | N                                   |

| Gene symbols | FDR (differential expression analysis) | Differentially expressed gene? Y, Yes; N, No | Number of insulin related publications | Insulin related gene? Y, Yes; N, No |
|--------------|----------------------------------------|----------------------------------------------|----------------------------------------|-------------------------------------|
| AC026979.3   | 0.966153359                            | N                                            | 0                                      | N                                   |
| AC068473.5   | 0.966153359                            | N                                            | 0                                      | N                                   |
| AC105384.2   | 0.966153359                            | N                                            | 0                                      | N                                   |
| AL008638.6   | 0.966153359                            | N                                            | 0                                      | N                                   |
| AL355994.4   | 0.966153359                            | N                                            | 0                                      | N                                   |
| BPNT1        | 0.966153359                            | N                                            | 0                                      | N                                   |
| BX537318.2   | 0.966153359                            | N                                            | 0                                      | N                                   |
| CHCHD6       | 0.966153359                            | N                                            | 1                                      | N                                   |
| FRAT2        | 0.966153359                            | N                                            | 1                                      | N                                   |
| ILDR2        | 0.966153359                            | N                                            | 1                                      | N                                   |
| KLF4         | 0.966153359                            | N                                            | 55                                     | N                                   |
| MPLKIP       | 0.966153359                            | N                                            | 0                                      | N                                   |
| MTERF4       | 0.966153359                            | N                                            | 1                                      | N                                   |
| NEB          | 0.966153359                            | N                                            | 39                                     | N                                   |
| NPRL3        | 0.966153359                            | N                                            | 0                                      | N                                   |
| PABPC1P4     | 0.966153359                            | N                                            | 0                                      | N                                   |
| PAX7         | 0.966153359                            | N                                            | 53                                     | N                                   |
| PHYH         | 0.966153359                            | N                                            | 1                                      | N                                   |
| PLEKHA7      | 0.966153359                            | N                                            | 0                                      | N                                   |
| PXN          | 0.966153359                            | N                                            | 41                                     | N                                   |
| R3HDM2P2     | 0.966153359                            | N                                            | 0                                      | N                                   |
| RHOD         | 0.966153359                            | N                                            | 3                                      | N                                   |
| SCAND1       | 0.966153359                            | N                                            | 3                                      | N                                   |
| SEMA3F       | 0.966153359                            | N                                            | 1                                      | N                                   |
| SP140L       | 0.966153359                            | N                                            | 0                                      | N                                   |
| TPGS2        | 0.966153359                            | N                                            | 0                                      | N                                   |
| VPS26AP1     | 0.966153359                            | N                                            | 0                                      | N                                   |
| ZNF503-AS2   | 0.966153359                            | N                                            | 0                                      | N                                   |
| CR391992.1   | 0.966214492                            | N                                            | 0                                      | N                                   |
| BCAT2        | 0.966339549                            | N                                            | 9                                      | N                                   |
| ZNF688       | 0.966339549                            | N                                            | 0                                      | N                                   |
| AC009229.1   | 0.96635416                             | N                                            | 0                                      | N                                   |
| ADGRL3       | 0.96635416                             | N                                            | 1                                      | N                                   |
| AP002748.3   | 0.96635416                             | N                                            | 0                                      | N                                   |
| CCDC78       | 0.96635416                             | N                                            | 0                                      | N                                   |
| NPHP1        | 0.96635416                             | N                                            | 0                                      | N                                   |
| RAP1B        | 0.96635416                             | N                                            | 5                                      | N                                   |
| SLC25A39     | 0.96635416                             | N                                            | 0                                      | N                                   |
| NDUFS1       | 0.966362177                            | N                                            | 3                                      | N                                   |
| PLGRKT       | 0.966362177                            | N                                            | 1                                      | N                                   |
| SAMHD1       | 0.966447133                            | N                                            | 1                                      | N                                   |
| AC005176.1   | 0.966449451                            | N                                            | 0                                      | N                                   |
| AC006042.3   | 0.966449451                            | N                                            | 0                                      | N                                   |
| AC011389.1   | 0.966449451                            | N                                            | 0                                      | N                                   |
| AL513175.2   | 0.966449451                            | N                                            | 0                                      | N                                   |
| ERCC8        | 0.966449451                            | N                                            | 3                                      | N                                   |
| LINC02202    | 0.966449451                            | N                                            | 0                                      | N                                   |
| LMTK2        | 0.966449451                            | N                                            | 0                                      | N                                   |
| LRRC4B       | 0.966449451                            | N                                            | 0                                      | N                                   |
| MYOM1        | 0.966449451                            | N                                            | 1                                      | N                                   |
| DHRS4L1      | 0.966454788                            | N                                            | 0                                      | N                                   |
| SBSN         | 0.966553011                            | N                                            | 0                                      | N                                   |
| LRRN1        | 0.966619234                            | N                                            | 2                                      | N                                   |
| PHF23        | 0.966619234                            | N                                            | 0                                      | N                                   |
| SLC25A6P2    | 0.966619234                            | N                                            | 0                                      | N                                   |
| WWOX         | 0.966619234                            | N                                            | 8                                      | N                                   |
| AC036108.2   | 0.966652714                            | N                                            | 0                                      | N                                   |
| AL034549.2   | 0.966652714                            | N                                            | 0                                      | N                                   |
| KANSL1       | 0.966652714                            | N                                            | 0                                      | N                                   |
| SLC43A2      | 0.966652714                            | N                                            | 0                                      | N                                   |
| AC135050.6   | 0.966714147                            | N                                            | 0                                      | N                                   |
| C3orf58      | 0.966714147                            | N                                            | 1                                      | N                                   |
| PDXP         | 0.966714147                            | N                                            | 0                                      | N                                   |
| SLC2A6       | 0.966714147                            | N                                            | 2                                      | N                                   |
| SNORA80D     | 0.966714147                            | N                                            | 0                                      | N                                   |
| AC092127.1   | 0.96680991                             | N                                            | 0                                      | N                                   |

| Gene symbols | FDR (differential expression analysis) | Differentially expressed gene? Y, Yes; N, No | Number of insulin related publications | Insulin related gene? Y, Yes; N, No |
|--------------|----------------------------------------|----------------------------------------------|----------------------------------------|-------------------------------------|
| DNAJC21      | 0.96682842                             | N                                            | 0                                      | N                                   |
| AC239803.1   | 0.966842442                            | N                                            | 0                                      | N                                   |
| GNPDA1       | 0.966842442                            | N                                            | 1                                      | N                                   |
| MYL6         | 0.966842442                            | N                                            | 1                                      | N                                   |
| S100PBP      | 0.966842442                            | N                                            | 0                                      | N                                   |
| TEAD3        | 0.966857506                            | N                                            | 1                                      | N                                   |
| AC092135.3   | 0.966903681                            | N                                            | 0                                      | N                                   |
| DOK1         | 0.966903681                            | N                                            | 14                                     | N                                   |
| INSM2        | 0.966903681                            | N                                            | 2                                      | N                                   |
| PGK1         | 0.966903681                            | N                                            | 12                                     | N                                   |
| ZNF474       | 0.966903681                            | N                                            | 0                                      | N                                   |
| HCG20        | 0.967086815                            | N                                            | 0                                      | N                                   |
| PTP4A1P7     | 0.967086815                            | N                                            | 0                                      | N                                   |
| TIGAR        | 0.967086815                            | N                                            | 6                                      | N                                   |
| TUNAR        | 0.967086815                            | N                                            | 0                                      | N                                   |
| AL132656.2   | 0.967136857                            | N                                            | 0                                      | N                                   |
| ATP6V0B      | 0.967136857                            | N                                            | 1                                      | N                                   |
| FASTKD5      | 0.967136857                            | N                                            | 0                                      | N                                   |
| HCG11        | 0.967136857                            | N                                            | 1                                      | N                                   |
| PNMA8B       | 0.967136857                            | N                                            | 0                                      | N                                   |
| CATSPER2     | 0.967329479                            | N                                            | 0                                      | N                                   |
| PYCR2        | 0.967359912                            | N                                            | 0                                      | N                                   |
| GRPR         | 0.967437561                            | N                                            | 3                                      | N                                   |
| AC004672.2   | 0.967470511                            | N                                            | 0                                      | N                                   |
| AC008549.2   | 0.967470511                            | N                                            | 0                                      | N                                   |
| AC090114.2   | 0.967470511                            | N                                            | 0                                      | N                                   |
| AC104390.1   | 0.967470511                            | N                                            | 0                                      | N                                   |
| AC130650.2   | 0.967470511                            | N                                            | 0                                      | N                                   |
| ADGRB2       | 0.967470511                            | N                                            | 1                                      | N                                   |
| AL359091.4   | 0.967470511                            | N                                            | 0                                      | N                                   |
| ATP9A        | 0.967470511                            | N                                            | 1                                      | N                                   |
| CBX7         | 0.967470511                            | N                                            | 1                                      | N                                   |
| CCNJP1       | 0.967470511                            | N                                            | 0                                      | N                                   |
| CDR1         | 0.967470511                            | N                                            | 4                                      | N                                   |
| DYNC111      | 0.967470511                            | N                                            | 0                                      | N                                   |
| EIF5A2       | 0.967470511                            | N                                            | 0                                      | N                                   |
| FCGBP        | 0.967470511                            | N                                            | 0                                      | N                                   |
| MEOX2        | 0.967470511                            | N                                            | 3                                      | N                                   |
| MSRB2        | 0.967470511                            | N                                            | 1                                      | N                                   |
| RN7SL33P     | 0.967470511                            | N                                            | 0                                      | N                                   |
| SRY          | 0.967470511                            | N                                            | 68                                     | N                                   |
| TIGD2        | 0.967470511                            | N                                            | 0                                      | N                                   |
| TRIP4        | 0.967470511                            | N                                            | 0                                      | N                                   |
| UBASH3B      | 0.967470511                            | N                                            | 0                                      | N                                   |
| USP27X       | 0.967470511                            | N                                            | 0                                      | N                                   |
| BCL2L14      | 0.967495433                            | N                                            | 0                                      | N                                   |
| C14orf119    | 0.967495433                            | N                                            | 0                                      | N                                   |
| AL360270.3   | 0.967609887                            | N                                            | 0                                      | N                                   |
| BRD3         | 0.967672597                            | N                                            | 2                                      | N                                   |
| C12orf50     | 0.967672597                            | N                                            | 0                                      | N                                   |
| MIEF2        | 0.967672597                            | N                                            | 0                                      | N                                   |
| MTRNR2L1     | 0.967672597                            | N                                            | 1                                      | N                                   |
| PLA2G12AP1   | 0.967672597                            | N                                            | 0                                      | N                                   |
| TACSTD2      | 0.967672597                            | N                                            | 2                                      | N                                   |
| TMEM178A     | 0.967672597                            | N                                            | 0                                      | N                                   |
| GNAI2        | 0.967929686                            | N                                            | 18                                     | N                                   |
| CISD1P1      | 0.96793516                             | N                                            | 0                                      | N                                   |
| HCN1         | 0.96793516                             | N                                            | 5                                      | N                                   |
| STARD3       | 0.96793516                             | N                                            | 4                                      | N                                   |
| AC090695.1   | 0.967959306                            | N                                            | 0                                      | N                                   |
| ABO          | 0.968103145                            | N                                            | 139                                    | Y                                   |
| CARMIL3      | 0.968103145                            | N                                            | 0                                      | N                                   |
| G0S2         | 0.968103145                            | N                                            | 35                                     | N                                   |
| ITGB1BP2     | 0.968103145                            | N                                            | 1                                      | N                                   |
| LINC00843    | 0.968103145                            | N                                            | 0                                      | N                                   |
| LINC01148    | 0.968103145                            | N                                            | 0                                      | N                                   |

| Gene symbols | FDR (differential expression analysis) | Differentially expressed gene? Y, Yes; N, No | Number of insulin related publications | Insulin related gene? Y, Yes; N, No |
|--------------|----------------------------------------|----------------------------------------------|----------------------------------------|-------------------------------------|
| LINC01686    | 0.968103145                            | N                                            | 0                                      | N                                   |
| LMNA         | 0.968103145                            | N                                            | 151                                    | Y                                   |
| MAFA         | 0.968103145                            | N                                            | 452                                    | Y                                   |
| MEX3A        | 0.968103145                            | N                                            | 1                                      | N                                   |
| PKM          | 0.968103145                            | N                                            | 8                                      | N                                   |
| POLL         | 0.968103145                            | N                                            | 25                                     | N                                   |
| RADIL        | 0.968103145                            | N                                            | 0                                      | N                                   |
| RINT1        | 0.968103145                            | N                                            | 0                                      | N                                   |
| SRGAP2C      | 0.968103145                            | N                                            | 0                                      | N                                   |
| VAMP2        | 0.968103145                            | N                                            | 136                                    | Y                                   |
| ZFAND4       | 0.968103145                            | N                                            | 1                                      | N                                   |
| ZSCAN5A      | 0.968103145                            | N                                            | 0                                      | N                                   |
| AC002094.1   | 0.968129649                            | N                                            | 0                                      | N                                   |
| AC027544.2   | 0.968129649                            | N                                            | 0                                      | N                                   |
| AC073911.1   | 0.968129649                            | N                                            | 0                                      | N                                   |
| AC100810.1   | 0.968129649                            | N                                            | 0                                      | N                                   |
| AC122688.4   | 0.968129649                            | N                                            | 0                                      | N                                   |
| AC124798.1   | 0.968129649                            | N                                            | 0                                      | N                                   |
| AC130448.1   | 0.968129649                            | N                                            | 0                                      | N                                   |
| AC135050.5   | 0.968129649                            | N                                            | 0                                      | N                                   |
| AL031595.3   | 0.968129649                            | N                                            | 0                                      | N                                   |
| AL031727.1   | 0.968129649                            | N                                            | 0                                      | N                                   |
| AL049796.1   | 0.968129649                            | N                                            | 0                                      | N                                   |
| AL355297.4   | 0.968129649                            | N                                            | 0                                      | N                                   |
| AL512356.3   | 0.968129649                            | N                                            | 0                                      | N                                   |
| AOC2         | 0.968129649                            | N                                            | 0                                      | N                                   |
| AP003108.3   | 0.968129649                            | N                                            | 0                                      | N                                   |
| C1RL-AS1     | 0.968129649                            | N                                            | 0                                      | N                                   |
| C3orf38      | 0.968129649                            | N                                            | 0                                      | N                                   |
| CBLN4        | 0.968129649                            | N                                            | 1                                      | N                                   |
| CLMN         | 0.968129649                            | N                                            | 0                                      | N                                   |
| DOCK11P1     | 0.968129649                            | N                                            | 0                                      | N                                   |
| DUSP18       | 0.968129649                            | N                                            | 0                                      | N                                   |
| EIF3LP2      | 0.968129649                            | N                                            | 0                                      | N                                   |
| FAM225B      | 0.968129649                            | N                                            | 0                                      | N                                   |
| GAS8         | 0.968129649                            | N                                            | 0                                      | N                                   |
| HINFP        | 0.968129649                            | N                                            | 0                                      | N                                   |
| HSD3B7       | 0.968129649                            | N                                            | 0                                      | N                                   |
| IFT172       | 0.968129649                            | N                                            | 2                                      | N                                   |
| KIF21B       | 0.968129649                            | N                                            | 0                                      | N                                   |
| KRT18P59     | 0.968129649                            | N                                            | 0                                      | N                                   |
| LINC01301    | 0.968129649                            | N                                            | 0                                      | N                                   |
| MAN2A2       | 0.968129649                            | N                                            | 1                                      | N                                   |
| MRPL45       | 0.968129649                            | N                                            | 0                                      | N                                   |
| MRPS35       | 0.968129649                            | N                                            | 0                                      | N                                   |
| MST1         | 0.968129649                            | N                                            | 13                                     | N                                   |
| MYLIP        | 0.968129649                            | N                                            | 2                                      | N                                   |
| NOXA1        | 0.968129649                            | N                                            | 3                                      | N                                   |
| P4HA2        | 0.968129649                            | N                                            | 1                                      | N                                   |
| PFDN5        | 0.968129649                            | N                                            | 1                                      | N                                   |
| PIGG         | 0.968129649                            | N                                            | 5                                      | N                                   |
| PKD1L2       | 0.968129649                            | N                                            | 0                                      | N                                   |
| PP2D1        | 0.968129649                            | N                                            | 0                                      | N                                   |
| RN7SKP62     | 0.968129649                            | N                                            | 0                                      | N                                   |
| RNASEH2CP1   | 0.968129649                            | N                                            | 0                                      | N                                   |
| RPL15P3      | 0.968129649                            | N                                            | 0                                      | N                                   |
| SNRPB2       | 0.968129649                            | N                                            | 0                                      | N                                   |
| STOML1       | 0.968129649                            | N                                            | 0                                      | N                                   |
| TBC1D13      | 0.968129649                            | N                                            | 2                                      | N                                   |
| YWHAE        | 0.968129649                            | N                                            | 1                                      | N                                   |
| A1BG         | 0.968239704                            | N                                            | 3                                      | N                                   |
| ABHD6        | 0.968239704                            | N                                            | 6                                      | N                                   |
| AC010809.3   | 0.968239704                            | N                                            | 0                                      | N                                   |
| ALKBH3-AS1   | 0.968239704                            | N                                            | 0                                      | N                                   |
| CACNA1G      | 0.968239704                            | N                                            | 13                                     | N                                   |
| CAV2         | 0.968239704                            | N                                            | 25                                     | N                                   |

| Gene symbols | FDR (differential expression analysis) | Differentially expressed gene? Y, Yes; N, No | Number of insulin related publications | Insulin related gene? Y, Yes; N, No |
|--------------|----------------------------------------|----------------------------------------------|----------------------------------------|-------------------------------------|
| CCSER1       | 0.968239704                            | N                                            | 0                                      | N                                   |
| DAB2IP       | 0.968239704                            | N                                            | 3                                      | N                                   |
| GBP6         | 0.968239704                            | N                                            | 1                                      | N                                   |
| GOLGA6L9     | 0.968239704                            | N                                            | 0                                      | N                                   |
| HCCS         | 0.968239704                            | N                                            | 84                                     | N                                   |
| JMJD6        | 0.968239704                            | N                                            | 1                                      | N                                   |
| KLHL42       | 0.968239704                            | N                                            | 0                                      | N                                   |
| MPST         | 0.968239704                            | N                                            | 2                                      | N                                   |
| NOS3         | 0.968239704                            | N                                            | 444                                    | Y                                   |
| PABPC1L      | 0.968239704                            | N                                            | 0                                      | N                                   |
| PCSK1        | 0.968239704                            | N                                            | 57                                     | N                                   |
| PPM1L        | 0.968239704                            | N                                            | 0                                      | N                                   |
| SLA2         | 0.968239704                            | N                                            | 0                                      | N                                   |
| SMG1P7       | 0.968239704                            | N                                            | 0                                      | N                                   |
| YWHAQ        | 0.968239704                            | N                                            | 1                                      | N                                   |
| JUP          | 0.968269104                            | N                                            | 5                                      | N                                   |
| RAD50        | 0.968269104                            | N                                            | 6                                      | N                                   |
| AC127024.2   | 0.968357745                            | N                                            | 0                                      | N                                   |
| CUZD1        | 0.968357745                            | N                                            | 0                                      | N                                   |
| FAM50B       | 0.968357745                            | N                                            | 0                                      | N                                   |
| TMEM254-AS1  | 0.968357745                            | N                                            | 0                                      | N                                   |
| UEVLD        | 0.968357745                            | N                                            | 0                                      | N                                   |
| XRN2         | 0.968357745                            | N                                            | 1                                      | N                                   |
| AC012613.2   | 0.968359355                            | N                                            | 0                                      | N                                   |
| AL590002.1   | 0.968359355                            | N                                            | 0                                      | N                                   |
| CCDC8        | 0.968359355                            | N                                            | 4                                      | N                                   |
| METAP1D      | 0.968359355                            | N                                            | 0                                      | N                                   |
| RP11-97O12.6 | 0.968359355                            | N                                            | 0                                      | N                                   |
| SUCLA2       | 0.968359355                            | N                                            | 1                                      | N                                   |
| AC002553.4   | 0.96839625                             | N                                            | 0                                      | N                                   |
| AC020658.2   | 0.96839625                             | N                                            | 0                                      | N                                   |
| AC110053.1   | 0.96839625                             | N                                            | 0                                      | N                                   |
| ADRA1B       | 0.96839625                             | N                                            | 7                                      | N                                   |
| AL021368.1   | 0.96839625                             | N                                            | 0                                      | N                                   |
| AL133245.1   | 0.96839625                             | N                                            | 0                                      | N                                   |
| AL139260.2   | 0.96839625                             | N                                            | 0                                      | N                                   |
| AP001282.1   | 0.96839625                             | N                                            | 0                                      | N                                   |
| AP006621.3   | 0.96839625                             | N                                            | 0                                      | N                                   |
| BX842559.2   | 0.96839625                             | N                                            | 0                                      | N                                   |
| CTA-796E4.5  | 0.96839625                             | N                                            | 0                                      | N                                   |
| DAZAP2P1     | 0.96839625                             | N                                            | 0                                      | N                                   |
| FLT4         | 0.96839625                             | N                                            | 3                                      | N                                   |
| GMPR2        | 0.96839625                             | N                                            | 0                                      | N                                   |
| GPRIN3       | 0.96839625                             | N                                            | 0                                      | N                                   |
| HSD11B1      | 0.96839625                             | N                                            | 81                                     | N                                   |
| MBD1         | 0.96839625                             | N                                            | 5                                      | N                                   |
| MBD4         | 0.96839625                             | N                                            | 1                                      | N                                   |
| MTFMT        | 0.96839625                             | N                                            | 0                                      | N                                   |
| PTCHD1       | 0.96839625                             | N                                            | 0                                      | N                                   |
| SACS         | 0.96839625                             | N                                            | 57                                     | N                                   |
| SVOP         | 0.96839625                             | N                                            | 0                                      | N                                   |
| TBX3         | 0.96839625                             | N                                            | 12                                     | N                                   |
| TDGF1        | 0.96839625                             | N                                            | 5                                      | N                                   |
| ZNF346       | 0.96839625                             | N                                            | 0                                      | N                                   |
| ZNF408       | 0.96839625                             | N                                            | 0                                      | N                                   |
| COX18        | 0.968448987                            | N                                            | 0                                      | N                                   |
| ENO1-AS1     | 0.968448987                            | N                                            | 0                                      | N                                   |
| ZMIZ1        | 0.968505272                            | N                                            | 6                                      | N                                   |
| GNA12        | 0.968559752                            | N                                            | 0                                      | N                                   |
| LINC01018    | 0.968559752                            | N                                            | 0                                      | N                                   |
| DTNB         | 0.968572873                            | N                                            | 47                                     | N                                   |
| TMEM8A       | 0.968572873                            | N                                            | 0                                      | N                                   |
| ZNF326       | 0.968572873                            | N                                            | 0                                      | N                                   |
| HSPB8        | 0.968610481                            | N                                            | 8                                      | N                                   |
| RFC1         | 0.968610481                            | N                                            | 3                                      | N                                   |
| AC051619.6   | 0.968612151                            | N                                            | 0                                      | N                                   |

| Gene symbols | FDR (differential expression analysis) | Differentially expressed gene? Y, Yes; N, No | Number of insulin related publications | Insulin related gene? Y, Yes; N, No |
|--------------|----------------------------------------|----------------------------------------------|----------------------------------------|-------------------------------------|
| RPS27P27     | 0.968612151                            | N                                            | 0                                      | N                                   |
| AP002807.1   | 0.968680514                            | N                                            | 0                                      | N                                   |
| AL132780.4   | 0.968712192                            | N                                            | 0                                      | N                                   |
| LINC01637    | 0.968712192                            | N                                            | 0                                      | N                                   |
| AC022217.1   | 0.968745194                            | N                                            | 0                                      | N                                   |
| AC096637.2   | 0.968745194                            | N                                            | 0                                      | N                                   |
| ARMC4        | 0.968745194                            | N                                            | 0                                      | N                                   |
| C2orf15      | 0.968745194                            | N                                            | 0                                      | N                                   |
| FZD7         | 0.968745194                            | N                                            | 3                                      | N                                   |
| GIPR         | 0.968745194                            | N                                            | 138                                    | Y                                   |
| PARP15       | 0.968745194                            | N                                            | 0                                      | N                                   |
| PDPK1        | 0.968745194                            | N                                            | 115                                    | Y                                   |
| RABGEF1      | 0.968745194                            | N                                            | 1                                      | N                                   |
| SMAD9        | 0.968745194                            | N                                            | 1                                      | N                                   |
| VKORC1L1     | 0.968745194                            | N                                            | 1                                      | N                                   |
| ZNRF2        | 0.968745194                            | N                                            | 2                                      | N                                   |
| SALRNA2      | 0.96894953                             | N                                            | 0                                      | N                                   |
| TMEM106A     | 0.969045942                            | N                                            | 0                                      | N                                   |
| APAF1        | 0.969089578                            | N                                            | 11                                     | N                                   |
| KIAA1328     | 0.969156955                            | N                                            | 0                                      | N                                   |
| PGAM1        | 0.969156955                            | N                                            | 2                                      | N                                   |
| AC007494.1   | 0.969163898                            | N                                            | 0                                      | N                                   |
| NEURL2       | 0.969163898                            | N                                            | 0                                      | N                                   |
| SNORD97      | 0.969163898                            | N                                            | 0                                      | N                                   |
| KLHL22       | 0.969244454                            | N                                            | 0                                      | N                                   |
| ZSCAN2       | 0.969244454                            | N                                            | 0                                      | N                                   |
| ABC8         | 0.969263458                            | N                                            | 1                                      | N                                   |
| AC004447.2   | 0.969263458                            | N                                            | 0                                      | N                                   |
| AC007683.1   | 0.969263458                            | N                                            | 0                                      | N                                   |
| AC112247.1   | 0.969263458                            | N                                            | 0                                      | N                                   |
| ANKRD65      | 0.969263458                            | N                                            | 0                                      | N                                   |
| FAM218A      | 0.969263458                            | N                                            | 0                                      | N                                   |
| STX4         | 0.969263458                            | N                                            | 6                                      | N                                   |
| TEDDM1       | 0.969263458                            | N                                            | 0                                      | N                                   |
| EEF1A1P3     | 0.969285305                            | N                                            | 0                                      | N                                   |
| ENDOU        | 0.969424521                            | N                                            | 5                                      | N                                   |
| AC008427.1   | 0.969444353                            | N                                            | 0                                      | N                                   |
| AC010327.5   | 0.969444353                            | N                                            | 0                                      | N                                   |
| AC073569.3   | 0.969444353                            | N                                            | 0                                      | N                                   |
| CEP19        | 0.969444353                            | N                                            | 1                                      | N                                   |
| CFLAR-AS1    | 0.969444353                            | N                                            | 0                                      | N                                   |
| CHMP4C       | 0.969444353                            | N                                            | 1                                      | N                                   |
| EFCAB13      | 0.969444353                            | N                                            | 0                                      | N                                   |
| GIMAP5       | 0.969444353                            | N                                            | 5                                      | N                                   |
| LINC0001     | 0.969444353                            | N                                            | 0                                      | N                                   |
| NPIP5        | 0.969444353                            | N                                            | 0                                      | N                                   |
| PPFIBP2      | 0.969444353                            | N                                            | 0                                      | N                                   |
| PTGES2-AS1   | 0.969444353                            | N                                            | 0                                      | N                                   |
| THNSL1       | 0.969444353                            | N                                            | 0                                      | N                                   |
| UBE2L3       | 0.969444353                            | N                                            | 1                                      | N                                   |
| AC005674.2   | 0.969493452                            | N                                            | 0                                      | N                                   |
| AL357315.2   | 0.969493452                            | N                                            | 0                                      | N                                   |
| GNG5         | 0.969493452                            | N                                            | 1                                      | N                                   |
| uc_338       | 0.969493452                            | N                                            | 0                                      | N                                   |
| WWP1         | 0.969493452                            | N                                            | 1                                      | N                                   |
| NAT9         | 0.969530505                            | N                                            | 0                                      | N                                   |
| POR          | 0.969549546                            | N                                            | 72                                     | N                                   |
| RTCA         | 0.969590238                            | N                                            | 3                                      | N                                   |
| AF186996.6   | 0.969622729                            | N                                            | 0                                      | N                                   |
| C9orf116     | 0.969622729                            | N                                            | 0                                      | N                                   |
| CFAP46       | 0.96964946                             | N                                            | 0                                      | N                                   |
| RAD52        | 0.96964946                             | N                                            | 4                                      | N                                   |
| CALR         | 0.969732128                            | N                                            | 5                                      | N                                   |
| PNPO         | 0.969732128                            | N                                            | 0                                      | N                                   |
| SPICE1       | 0.969732128                            | N                                            | 0                                      | N                                   |
| LINC02516    | 0.969970702                            | N                                            | 0                                      | N                                   |

| Gene symbols    | FDR (differential expression analysis) | Differentially expressed gene? Y, Yes; N, No | Number of insulin related publications | Insulin related gene? Y, Yes; N, No |
|-----------------|----------------------------------------|----------------------------------------------|----------------------------------------|-------------------------------------|
| AC015871.1      | 0.969999564                            | N                                            | 0                                      | N                                   |
| CHML            | 0.969999564                            | N                                            | 0                                      | N                                   |
| DCTN6           | 0.969999564                            | N                                            | 0                                      | N                                   |
| GCOM1           | 0.969999564                            | N                                            | 1                                      | N                                   |
| GDI2            | 0.969999564                            | N                                            | 2                                      | N                                   |
| MDM2            | 0.969999564                            | N                                            | 102                                    | Y                                   |
| MED25           | 0.969999564                            | N                                            | 1                                      | N                                   |
| MTRR            | 0.969999564                            | N                                            | 5                                      | N                                   |
| PSMD7           | 0.969999564                            | N                                            | 0                                      | N                                   |
| RANBP17         | 0.969999564                            | N                                            | 0                                      | N                                   |
| SF3B4           | 0.969999564                            | N                                            | 0                                      | N                                   |
| TMEM175         | 0.969999564                            | N                                            | 0                                      | N                                   |
| TTC41P          | 0.969999564                            | N                                            | 0                                      | N                                   |
| AC114947.2      | 0.970096401                            | N                                            | 0                                      | N                                   |
| AL138690.1      | 0.970096401                            | N                                            | 0                                      | N                                   |
| RGS16           | 0.970096401                            | N                                            | 7                                      | N                                   |
| ST6GALNAC2      | 0.970096401                            | N                                            | 0                                      | N                                   |
| FLNB            | 0.970229511                            | N                                            | 2                                      | N                                   |
| MAP2K7          | 0.970298885                            | N                                            | 4                                      | N                                   |
| SLC44A3         | 0.970298885                            | N                                            | 0                                      | N                                   |
| AP2S1           | 0.970364962                            | N                                            | 1                                      | N                                   |
| AC003002.1      | 0.970402296                            | N                                            | 0                                      | N                                   |
| AC018442.1      | 0.970402296                            | N                                            | 0                                      | N                                   |
| AC020915.3      | 0.970402296                            | N                                            | 0                                      | N                                   |
| AC126773.3      | 0.970402296                            | N                                            | 0                                      | N                                   |
| AC139768.1      | 0.970402296                            | N                                            | 0                                      | N                                   |
| AC243972.2      | 0.970402296                            | N                                            | 0                                      | N                                   |
| ACOT9           | 0.970402296                            | N                                            | 0                                      | N                                   |
| ADCY2           | 0.970402296                            | N                                            | 1                                      | N                                   |
| AHNAK           | 0.970402296                            | N                                            | 4                                      | N                                   |
| AL138828.1      | 0.970402296                            | N                                            | 0                                      | N                                   |
| AP000753.3      | 0.970402296                            | N                                            | 0                                      | N                                   |
| ARL11           | 0.970402296                            | N                                            | 0                                      | N                                   |
| BAHCC1          | 0.970402296                            | N                                            | 0                                      | N                                   |
| BNIP3P5         | 0.970402296                            | N                                            | 0                                      | N                                   |
| C11orf65        | 0.970402296                            | N                                            | 1                                      | N                                   |
| CAP1            | 0.970402296                            | N                                            | 7                                      | N                                   |
| CDH12           | 0.970402296                            | N                                            | 1                                      | N                                   |
| DERL2           | 0.970402296                            | N                                            | 1                                      | N                                   |
| EHD1            | 0.970402296                            | N                                            | 9                                      | N                                   |
| FAM26F          | 0.970402296                            | N                                            | 0                                      | N                                   |
| FGFR4           | 0.970402296                            | N                                            | 32                                     | N                                   |
| GATA5           | 0.970402296                            | N                                            | 2                                      | N                                   |
| GDI2P1          | 0.970402296                            | N                                            | 0                                      | N                                   |
| HOOK1           | 0.970402296                            | N                                            | 0                                      | N                                   |
| LINC02072       | 0.970402296                            | N                                            | 0                                      | N                                   |
| MIR181A2HG      | 0.970402296                            | N                                            | 0                                      | N                                   |
| NT5C3B          | 0.970402296                            | N                                            | 0                                      | N                                   |
| PPDPF           | 0.970402296                            | N                                            | 0                                      | N                                   |
| PTGIS           | 0.970402296                            | N                                            | 2                                      | N                                   |
| RASL10B         | 0.970402296                            | N                                            | 0                                      | N                                   |
| RGS3            | 0.970402296                            | N                                            | 3                                      | N                                   |
| ROPN1L          | 0.970402296                            | N                                            | 0                                      | N                                   |
| RP11-680G24.5   | 0.970402296                            | N                                            | 0                                      | N                                   |
| SPECC1L-ADORA2A | 0.970402296                            | N                                            | 0                                      | N                                   |
| TSPYL2          | 0.970402296                            | N                                            | 0                                      | N                                   |
| TXN             | 0.970402296                            | N                                            | 17                                     | N                                   |
| TXNIP           | 0.970402296                            | N                                            | 158                                    | Y                                   |
| UBE2D3P1        | 0.970402296                            | N                                            | 0                                      | N                                   |
| VN1R108P        | 0.970402296                            | N                                            | 0                                      | N                                   |
| WDR63           | 0.970402296                            | N                                            | 0                                      | N                                   |
| ZNF200          | 0.970402296                            | N                                            | 0                                      | N                                   |
| AC012313.1      | 0.970415601                            | N                                            | 0                                      | N                                   |
| AC055717.1      | 0.970415601                            | N                                            | 0                                      | N                                   |
| AC064875.1      | 0.970415601                            | N                                            | 0                                      | N                                   |
| DCSTAMP         | 0.970415601                            | N                                            | 0                                      | N                                   |

| Gene symbols | FDR (differential expression analysis) | Differentially expressed gene? Y, Yes; N, No | Number of insulin related publications | Insulin related gene? Y, Yes; N, No |
|--------------|----------------------------------------|----------------------------------------------|----------------------------------------|-------------------------------------|
| SBDSP1       | 0.970415601                            | N                                            | 0                                      | N                                   |
| SELIL3       | 0.970415601                            | N                                            | 0                                      | N                                   |
| BPHL         | 0.970430827                            | N                                            | 0                                      | N                                   |
| SLX1A        | 0.970431773                            | N                                            | 0                                      | N                                   |
| AC073861.1   | 0.970439567                            | N                                            | 0                                      | N                                   |
| AL590426.1   | 0.970439567                            | N                                            | 0                                      | N                                   |
| FOXO1        | 0.970439567                            | N                                            | 1000                                   | Y                                   |
| ITGB5        | 0.970439567                            | N                                            | 3                                      | N                                   |
| RIPPLY3      | 0.970439567                            | N                                            | 0                                      | N                                   |
| SH3BP5L      | 0.970439567                            | N                                            | 0                                      | N                                   |
| MTHFD1L      | 0.970474504                            | N                                            | 1                                      | N                                   |
| TBX15        | 0.970606297                            | N                                            | 8                                      | N                                   |
| PARD6B       | 0.970686068                            | N                                            | 0                                      | N                                   |
| OLMALINC     | 0.970688453                            | N                                            | 0                                      | N                                   |
| TIMM44       | 0.970688453                            | N                                            | 1                                      | N                                   |
| ARHGAP18     | 0.970732499                            | N                                            | 0                                      | N                                   |
| AC003101.1   | 0.970766663                            | N                                            | 0                                      | N                                   |
| KATNBL1      | 0.970766663                            | N                                            | 0                                      | N                                   |
| ZNF680       | 0.970766663                            | N                                            | 0                                      | N                                   |
| HIPK1-AS1    | 0.970834375                            | N                                            | 0                                      | N                                   |
| AL139407.1   | 0.970892965                            | N                                            | 0                                      | N                                   |
| IGSF11       | 0.970892965                            | N                                            | 1                                      | N                                   |
| AC027763.1   | 0.971067406                            | N                                            | 0                                      | N                                   |
| AC126323.6   | 0.971067406                            | N                                            | 0                                      | N                                   |
| CCN12        | 0.971067406                            | N                                            | 1                                      | N                                   |
| SIX1         | 0.971067406                            | N                                            | 3                                      | N                                   |
| RPL27A       | 0.97107725                             | N                                            | 2                                      | N                                   |
| SRCAP        | 0.97107725                             | N                                            | 0                                      | N                                   |
| RPL23P8      | 0.971120644                            | N                                            | 0                                      | N                                   |
| RPL8P2       | 0.971168165                            | N                                            | 0                                      | N                                   |
| EXOC3L1      | 0.97117527                             | N                                            | 0                                      | N                                   |
| AC007229.1   | 0.971200097                            | N                                            | 0                                      | N                                   |
| ISG20L2      | 0.971200097                            | N                                            | 0                                      | N                                   |
| AC113367.3   | 0.971374979                            | N                                            | 0                                      | N                                   |
| AC134349.1   | 0.971374979                            | N                                            | 0                                      | N                                   |
| BLVRA        | 0.971374979                            | N                                            | 4                                      | N                                   |
| CLASP2       | 0.971374979                            | N                                            | 4                                      | N                                   |
| CPXM1        | 0.971374979                            | N                                            | 1                                      | N                                   |
| HAP1         | 0.971374979                            | N                                            | 11                                     | N                                   |
| ZDHHHC11     | 0.971374979                            | N                                            | 0                                      | N                                   |
| ADCY7        | 0.971397587                            | N                                            | 1                                      | N                                   |
| C15orf52     | 0.971397587                            | N                                            | 0                                      | N                                   |
| CABP1        | 0.971397587                            | N                                            | 2                                      | N                                   |
| ENPEP        | 0.971397587                            | N                                            | 1                                      | N                                   |
| LINC01204    | 0.971397587                            | N                                            | 0                                      | N                                   |
| PART1        | 0.971397587                            | N                                            | 1                                      | N                                   |
| POMGNT2      | 0.971397587                            | N                                            | 0                                      | N                                   |
| PRDX4        | 0.971397587                            | N                                            | 7                                      | N                                   |
| TMEM259      | 0.971397587                            | N                                            | 0                                      | N                                   |
| DDX50P1      | 0.971411702                            | N                                            | 0                                      | N                                   |
| AC007014.2   | 0.971465244                            | N                                            | 0                                      | N                                   |
| AC010320.4   | 0.971465244                            | N                                            | 0                                      | N                                   |
| AL021877.2   | 0.971465244                            | N                                            | 0                                      | N                                   |
| ARSK         | 0.971465244                            | N                                            | 0                                      | N                                   |
| CTF1         | 0.971465244                            | N                                            | 2                                      | N                                   |
| FGD5         | 0.971465244                            | N                                            | 2                                      | N                                   |
| FURIN        | 0.971465244                            | N                                            | 162                                    | Y                                   |
| GPSM1        | 0.971465244                            | N                                            | 1                                      | N                                   |
| NR1H2        | 0.971465244                            | N                                            | 7                                      | N                                   |
| ZCWPW1       | 0.971705531                            | N                                            | 0                                      | N                                   |
| PLEC         | 0.97170745                             | N                                            | 1                                      | N                                   |
| AC011495.1   | 0.971746292                            | N                                            | 0                                      | N                                   |
| GGA3         | 0.971746292                            | N                                            | 6                                      | N                                   |
| AC079905.1   | 0.971773915                            | N                                            | 0                                      | N                                   |
| AC019069.1   | 0.971820025                            | N                                            | 0                                      | N                                   |
| AC055811.4   | 0.971825119                            | N                                            | 0                                      | N                                   |



| Gene symbols | FDR (differential expression analysis) | Differentially expressed gene? Y, Yes; N, No | Number of insulin related publications | Insulin related gene? Y, Yes; N, No |
|--------------|----------------------------------------|----------------------------------------------|----------------------------------------|-------------------------------------|
| AC091132.5   | 0.971825119                            | N                                            | 0                                      | N                                   |
| AC096996.1   | 0.971825119                            | N                                            | 0                                      | N                                   |
| OTUD3        | 0.971825119                            | N                                            | 0                                      | N                                   |
| MIR194-2HG   | 0.97200644                             | N                                            | 0                                      | N                                   |
| SMCR8        | 0.97200644                             | N                                            | 0                                      | N                                   |
| AC006512.2   | 0.972043233                            | N                                            | 0                                      | N                                   |
| AFAP1L2      | 0.972043233                            | N                                            | 0                                      | N                                   |
| LRRC59       | 0.972043233                            | N                                            | 0                                      | N                                   |
| PTRHD1       | 0.972043233                            | N                                            | 0                                      | N                                   |
| RNF114       | 0.972043233                            | N                                            | 0                                      | N                                   |
| RXRA         | 0.972043233                            | N                                            | 15                                     | N                                   |
| SP2          | 0.972043233                            | N                                            | 9                                      | N                                   |
| LINC00511    | 0.97206248                             | N                                            | 0                                      | N                                   |
| PDE4B        | 0.97206248                             | N                                            | 7                                      | N                                   |
| HSPA5        | 0.972069873                            | N                                            | 43                                     | N                                   |
| ACTA2        | 0.97212476                             | N                                            | 30                                     | N                                   |
| ATP6V0E1P3   | 0.97212476                             | N                                            | 0                                      | N                                   |
| BTF3P13      | 0.97212476                             | N                                            | 0                                      | N                                   |
| CMAHP        | 0.97212476                             | N                                            | 0                                      | N                                   |
| ESD          | 0.97212476                             | N                                            | 10                                     | N                                   |
| GRM8         | 0.97212476                             | N                                            | 0                                      | N                                   |
| HID1         | 0.97212476                             | N                                            | 0                                      | N                                   |
| STRN4        | 0.97212476                             | N                                            | 1                                      | N                                   |
| AL391832.2   | 0.972145125                            | N                                            | 0                                      | N                                   |
| WIZP1        | 0.972145125                            | N                                            | 0                                      | N                                   |
| DPYSL3       | 0.972240509                            | N                                            | 3                                      | N                                   |
| CUBN         | 0.972243754                            | N                                            | 1                                      | N                                   |
| LINC01184    | 0.972243754                            | N                                            | 0                                      | N                                   |
| OTULIN       | 0.972243754                            | N                                            | 0                                      | N                                   |
| POLR3GP2     | 0.972243754                            | N                                            | 0                                      | N                                   |
| ZNF614       | 0.972330825                            | N                                            | 0                                      | N                                   |
| EIPR1-IT1    | 0.972396271                            | N                                            | 0                                      | N                                   |
| LRRC8A       | 0.972444679                            | N                                            | 10                                     | N                                   |
| BCAR1        | 0.972447132                            | N                                            | 21                                     | N                                   |
| CDR2L        | 0.972461146                            | N                                            | 0                                      | N                                   |
| AQP7         | 0.972537037                            | N                                            | 53                                     | N                                   |
| BDH1         | 0.972537037                            | N                                            | 5                                      | N                                   |
| GAPDHP71     | 0.972537037                            | N                                            | 0                                      | N                                   |
| KIT          | 0.97255721                             | N                                            | 1000                                   | Y                                   |
| OSBPL11      | 0.97255721                             | N                                            | 0                                      | N                                   |
| AL034549.1   | 0.972627151                            | N                                            | 0                                      | N                                   |
| LIMCH1       | 0.972627151                            | N                                            | 0                                      | N                                   |
| TCEAL4       | 0.972627151                            | N                                            | 0                                      | N                                   |
| TMEM75       | 0.972627151                            | N                                            | 0                                      | N                                   |
| AC009487.4   | 0.97276545                             | N                                            | 0                                      | N                                   |
| CPB2-AS1     | 0.97276545                             | N                                            | 0                                      | N                                   |
| SEMA4D       | 0.97276545                             | N                                            | 2                                      | N                                   |
| AHDC1        | 0.97281775                             | N                                            | 0                                      | N                                   |
| MTMR2        | 0.972869107                            | N                                            | 0                                      | N                                   |
| ZG16         | 0.972869107                            | N                                            | 0                                      | N                                   |
| COL14A1      | 0.972941336                            | N                                            | 0                                      | N                                   |
| DCAF13P2     | 0.972941336                            | N                                            | 0                                      | N                                   |
| LIPT1        | 0.972941336                            | N                                            | 0                                      | N                                   |
| SPECC1L      | 0.972941336                            | N                                            | 0                                      | N                                   |
| TUSC1        | 0.972941336                            | N                                            | 1                                      | N                                   |
| AC104506.1   | 0.972943906                            | N                                            | 0                                      | N                                   |
| AC116050.1   | 0.972977968                            | N                                            | 0                                      | N                                   |
| AC116366.1   | 0.972977968                            | N                                            | 0                                      | N                                   |
| AP000769.1   | 0.972977968                            | N                                            | 0                                      | N                                   |
| DLG1-AS1     | 0.972977968                            | N                                            | 0                                      | N                                   |
| FBXW5        | 0.972996403                            | N                                            | 0                                      | N                                   |
| ISYNA1       | 0.972996403                            | N                                            | 0                                      | N                                   |
| AC010969.2   | 0.973078411                            | N                                            | 0                                      | N                                   |
| AC027601.1   | 0.973078411                            | N                                            | 0                                      | N                                   |
| AC104651.1   | 0.973078411                            | N                                            | 0                                      | N                                   |
| AL392172.1   | 0.973078411                            | N                                            | 0                                      | N                                   |

| Gene symbols | FDR (differential expression analysis) | Differentially expressed gene? Y, Yes; N, No | Number of insulin related publications | Insulin related gene? Y, Yes; N, No |
|--------------|----------------------------------------|----------------------------------------------|----------------------------------------|-------------------------------------|
| SEC23A-AS1   | 0.973078411                            | N                                            | 0                                      | N                                   |
| Z97192.2     | 0.973078411                            | N                                            | 0                                      | N                                   |
| CDK9         | 0.973139888                            | N                                            | 5                                      | N                                   |
| MGAM2        | 0.973139888                            | N                                            | 1                                      | N                                   |
| RPL18A       | 0.973160323                            | N                                            | 0                                      | N                                   |
| AC008103.1   | 0.973234839                            | N                                            | 0                                      | N                                   |
| AC105094.2   | 0.973234839                            | N                                            | 0                                      | N                                   |
| FDPSP4       | 0.973234839                            | N                                            | 0                                      | N                                   |
| LAMP2        | 0.973234839                            | N                                            | 18                                     | N                                   |
| SYT16        | 0.973331326                            | N                                            | 0                                      | N                                   |
| TNRC6C       | 0.973350154                            | N                                            | 0                                      | N                                   |
| AC124319.4   | 0.973362942                            | N                                            | 0                                      | N                                   |
| ALDOAP2      | 0.973421614                            | N                                            | 0                                      | N                                   |
| USP7         | 0.973421614                            | N                                            | 5                                      | N                                   |
| TMC7         | 0.973556633                            | N                                            | 0                                      | N                                   |
| AC002310.6   | 0.973595824                            | N                                            | 0                                      | N                                   |
| AC007249.2   | 0.973595824                            | N                                            | 0                                      | N                                   |
| AC010273.1   | 0.973595824                            | N                                            | 0                                      | N                                   |
| AC010834.3   | 0.973595824                            | N                                            | 0                                      | N                                   |
| AC012653.1   | 0.973595824                            | N                                            | 0                                      | N                                   |
| AC079780.1   | 0.973595824                            | N                                            | 0                                      | N                                   |
| ADAMTS4      | 0.973595824                            | N                                            | 13                                     | N                                   |
| AL356481.1   | 0.973595824                            | N                                            | 0                                      | N                                   |
| ARL4D        | 0.973595824                            | N                                            | 1                                      | N                                   |
| ARMC8        | 0.973595824                            | N                                            | 0                                      | N                                   |
| BVES-AS1     | 0.973595824                            | N                                            | 0                                      | N                                   |
| CCDC102A     | 0.973595824                            | N                                            | 0                                      | N                                   |
| CNBP         | 0.973595824                            | N                                            | 6                                      | N                                   |
| CR381653.1   | 0.973595824                            | N                                            | 0                                      | N                                   |
| EIF1P5       | 0.973595824                            | N                                            | 0                                      | N                                   |
| FBR5         | 0.973595824                            | N                                            | 0                                      | N                                   |
| FSTL3        | 0.973595824                            | N                                            | 20                                     | N                                   |
| GNAS-AS1     | 0.973595824                            | N                                            | 1                                      | N                                   |
| GUSBP3       | 0.973595824                            | N                                            | 0                                      | N                                   |
| HMGN1P35     | 0.973595824                            | N                                            | 0                                      | N                                   |
| HOXD13       | 0.973595824                            | N                                            | 0                                      | N                                   |
| IL12RB2      | 0.973595824                            | N                                            | 0                                      | N                                   |
| KATNB1       | 0.973595824                            | N                                            | 0                                      | N                                   |
| MAP3K9       | 0.973595824                            | N                                            | 1                                      | N                                   |
| MBL1P        | 0.973595824                            | N                                            | 0                                      | N                                   |
| MGAT5B       | 0.973595824                            | N                                            | 0                                      | N                                   |
| MOCOS        | 0.973595824                            | N                                            | 0                                      | N                                   |
| MSH3         | 0.973595824                            | N                                            | 3                                      | N                                   |
| PLAU         | 0.973595824                            | N                                            | 8                                      | N                                   |
| SDCBPP2      | 0.973595824                            | N                                            | 0                                      | N                                   |
| SLC25A22     | 0.973595824                            | N                                            | 2                                      | N                                   |
| SOX12        | 0.973595824                            | N                                            | 1                                      | N                                   |
| SPIN1        | 0.973595824                            | N                                            | 0                                      | N                                   |
| STRADA       | 0.973595824                            | N                                            | 50                                     | N                                   |
| TMEM109      | 0.973595824                            | N                                            | 1                                      | N                                   |
| TRMT11       | 0.973595824                            | N                                            | 0                                      | N                                   |
| AC022960.2   | 0.973614975                            | N                                            | 0                                      | N                                   |
| AC108047.1   | 0.973672106                            | N                                            | 0                                      | N                                   |
| NDUFV2-AS1   | 0.973695841                            | N                                            | 0                                      | N                                   |
| AL121672.1   | 0.973696149                            | N                                            | 0                                      | N                                   |
| FAM193A      | 0.973696149                            | N                                            | 0                                      | N                                   |
| QSER1        | 0.973696149                            | N                                            | 0                                      | N                                   |
| UFSP2        | 0.973696149                            | N                                            | 0                                      | N                                   |
| AC092115.2   | 0.973702059                            | N                                            | 0                                      | N                                   |
| AC092724.1   | 0.973702059                            | N                                            | 0                                      | N                                   |
| ZNF75D       | 0.973702059                            | N                                            | 0                                      | N                                   |
| AC104564.3   | 0.973827208                            | N                                            | 0                                      | N                                   |
| UAP1L1       | 0.973827208                            | N                                            | 0                                      | N                                   |
| WSCD1        | 0.973827208                            | N                                            | 0                                      | N                                   |
| AC006511.3   | 0.973900429                            | N                                            | 0                                      | N                                   |
| AL021707.2   | 0.973900429                            | N                                            | 0                                      | N                                   |

| Gene symbols | FDR (differential expression analysis) | Differentially expressed gene? Y, Yes; N, No | Number of insulin related publications | Insulin related gene? Y, Yes; N, No |
|--------------|----------------------------------------|----------------------------------------------|----------------------------------------|-------------------------------------|
| CFAP58       | 0.973900429                            | N                                            | 0                                      | N                                   |
| NACC1        | 0.973900429                            | N                                            | 0                                      | N                                   |
| TMEM35B      | 0.973900429                            | N                                            | 0                                      | N                                   |
| TMPPE        | 0.973900429                            | N                                            | 0                                      | N                                   |
| ZFP92        | 0.973900429                            | N                                            | 0                                      | N                                   |
| PTPRD        | 0.973916032                            | N                                            | 12                                     | N                                   |
| APOM         | 0.973959548                            | N                                            | 29                                     | N                                   |
| TAF12        | 0.973970326                            | N                                            | 0                                      | N                                   |
| PRICKLE3     | 0.974162592                            | N                                            | 0                                      | N                                   |
| AC025181.1   | 0.974175103                            | N                                            | 0                                      | N                                   |
| AC093259.1   | 0.974175103                            | N                                            | 0                                      | N                                   |
| CREM         | 0.974175103                            | N                                            | 18                                     | N                                   |
| EIF1AX       | 0.974175103                            | N                                            | 0                                      | N                                   |
| FBXO17       | 0.974175103                            | N                                            | 0                                      | N                                   |
| TJAP1        | 0.974175103                            | N                                            | 0                                      | N                                   |
| TNRC6C-AS1   | 0.974175103                            | N                                            | 0                                      | N                                   |
| TRMT1L       | 0.974175103                            | N                                            | 0                                      | N                                   |
| PKD1L1       | 0.974253798                            | N                                            | 0                                      | N                                   |
| CD34         | 0.974266396                            | N                                            | 356                                    | Y                                   |
| IER2         | 0.974266396                            | N                                            | 2                                      | N                                   |
| AL354993.1   | 0.97449447                             | N                                            | 0                                      | N                                   |
| CAMSAP3      | 0.97449447                             | N                                            | 0                                      | N                                   |
| COQ4         | 0.97449447                             | N                                            | 0                                      | N                                   |
| HAUS7        | 0.97449447                             | N                                            | 0                                      | N                                   |
| HRAT17       | 0.97449447                             | N                                            | 0                                      | N                                   |
| HSPA1L       | 0.97449447                             | N                                            | 2                                      | N                                   |
| NME2         | 0.97449447                             | N                                            | 4                                      | N                                   |
| RAPGEF4-AS1  | 0.97449447                             | N                                            | 0                                      | N                                   |
| RPS12P5      | 0.97449447                             | N                                            | 0                                      | N                                   |
| SCFD2        | 0.97449447                             | N                                            | 0                                      | N                                   |
| SLC16A13     | 0.97449447                             | N                                            | 0                                      | N                                   |
| VAMP5        | 0.97449447                             | N                                            | 2                                      | N                                   |
| IFT88        | 0.974605159                            | N                                            | 3                                      | N                                   |
| DAXX         | 0.97461648                             | N                                            | 12                                     | N                                   |
| AC090515.2   | 0.974669877                            | N                                            | 0                                      | N                                   |
| AL133230.1   | 0.974707638                            | N                                            | 0                                      | N                                   |
| AL645504.1   | 0.974707638                            | N                                            | 0                                      | N                                   |
| FAM213A      | 0.974707638                            | N                                            | 0                                      | N                                   |
| ID1          | 0.974707638                            | N                                            | 1                                      | N                                   |
| LIMK1        | 0.974707638                            | N                                            | 9                                      | N                                   |
| MOCS3        | 0.974707638                            | N                                            | 0                                      | N                                   |
| PLEKHA4      | 0.974707638                            | N                                            | 0                                      | N                                   |
| PON3         | 0.974707638                            | N                                            | 8                                      | N                                   |
| SNORA84      | 0.974707638                            | N                                            | 0                                      | N                                   |
| BCRP2        | 0.97475441                             | N                                            | 0                                      | N                                   |
| CFAP157      | 0.97475441                             | N                                            | 0                                      | N                                   |
| GSR          | 0.97475441                             | N                                            | 19                                     | N                                   |
| HNRNPH2      | 0.97475441                             | N                                            | 0                                      | N                                   |
| KLHL8        | 0.97475441                             | N                                            | 0                                      | N                                   |
| LINC01410    | 0.97475441                             | N                                            | 0                                      | N                                   |
| SELENOI      | 0.97475441                             | N                                            | 0                                      | N                                   |
| SYVN1        | 0.97475441                             | N                                            | 6                                      | N                                   |
| TUB          | 0.97475441                             | N                                            | 38                                     | N                                   |
| ZNF648       | 0.97475441                             | N                                            | 0                                      | N                                   |
| C18orf21     | 0.974756133                            | N                                            | 0                                      | N                                   |
| DDX3P1       | 0.974756133                            | N                                            | 0                                      | N                                   |
| ZNF507       | 0.974756133                            | N                                            | 0                                      | N                                   |
| CRK          | 0.974773                               | N                                            | 87                                     | N                                   |
| AC110792.3   | 0.974780578                            | N                                            | 0                                      | N                                   |
| C12orf57     | 0.974780578                            | N                                            | 0                                      | N                                   |
| OLFML1       | 0.974864371                            | N                                            | 1                                      | N                                   |
| Z98884.2     | 0.974875708                            | N                                            | 0                                      | N                                   |
| AC093788.1   | 0.974885401                            | N                                            | 0                                      | N                                   |
| RRM2B        | 0.975029963                            | N                                            | 3                                      | N                                   |
| AC069234.5   | 0.975080321                            | N                                            | 0                                      | N                                   |
| OR51E2       | 0.975080321                            | N                                            | 0                                      | N                                   |

| Gene symbols | FDR (differential expression analysis) | Differentially expressed gene? Y, Yes; N, No | Number of insulin related publications | Insulin related gene? Y, Yes; N, No |
|--------------|----------------------------------------|----------------------------------------------|----------------------------------------|-------------------------------------|
| POGLUT1      | 0.975080321                            | N                                            | 0                                      | N                                   |
| PRR14L       | 0.975089125                            | N                                            | 1                                      | N                                   |
| TBC1D14      | 0.975200509                            | N                                            | 0                                      | N                                   |
| AC068282.1   | 0.97538568                             | N                                            | 0                                      | N                                   |
| AC100788.2   | 0.97538568                             | N                                            | 0                                      | N                                   |
| AC104237.2   | 0.97538568                             | N                                            | 0                                      | N                                   |
| AP001033.1   | 0.97538568                             | N                                            | 0                                      | N                                   |
| C12orf4      | 0.97538568                             | N                                            | 0                                      | N                                   |
| CLPTM1       | 0.97538568                             | N                                            | 0                                      | N                                   |
| CYP2B7P      | 0.97538568                             | N                                            | 0                                      | N                                   |
| DPH2         | 0.97538568                             | N                                            | 0                                      | N                                   |
| PHKA1P1      | 0.97538568                             | N                                            | 0                                      | N                                   |
| SEMA3D       | 0.97538568                             | N                                            | 1                                      | N                                   |
| UGGT1        | 0.97538568                             | N                                            | 1                                      | N                                   |
| AC063965.1   | 0.975505653                            | N                                            | 0                                      | N                                   |
| ADAMTS2      | 0.975505653                            | N                                            | 3                                      | N                                   |
| AL160314.2   | 0.975505653                            | N                                            | 0                                      | N                                   |
| CYP4V2       | 0.975505653                            | N                                            | 1                                      | N                                   |
| LINC00900    | 0.975505653                            | N                                            | 0                                      | N                                   |
| PAIP2B       | 0.975505653                            | N                                            | 0                                      | N                                   |
| RHOG         | 0.975505653                            | N                                            | 3                                      | N                                   |
| CSRNP1       | 0.975527868                            | N                                            | 0                                      | N                                   |
| LINC01109    | 0.975527868                            | N                                            | 0                                      | N                                   |
| OVCH2        | 0.975527868                            | N                                            | 0                                      | N                                   |
| RBP5         | 0.975527868                            | N                                            | 0                                      | N                                   |
| AC008013.1   | 0.975535038                            | N                                            | 0                                      | N                                   |
| SLCO2B1      | 0.975702268                            | N                                            | 2                                      | N                                   |
| ADH4         | 0.975702703                            | N                                            | 1                                      | N                                   |
| AL645933.2   | 0.975702703                            | N                                            | 0                                      | N                                   |
| CTSB         | 0.975702703                            | N                                            | 16                                     | N                                   |
| LTB4R        | 0.975702703                            | N                                            | 4                                      | N                                   |
| PSMA3        | 0.975702703                            | N                                            | 1                                      | N                                   |
| SNORA11F     | 0.975702703                            | N                                            | 0                                      | N                                   |
| INPP5A       | 0.975842807                            | N                                            | 3                                      | N                                   |
| NPM1P9       | 0.975901932                            | N                                            | 0                                      | N                                   |
| AC026410.3   | 0.975981871                            | N                                            | 0                                      | N                                   |
| AC007569.1   | 0.976014515                            | N                                            | 0                                      | N                                   |
| C14orf178    | 0.976014515                            | N                                            | 0                                      | N                                   |
| GLI4         | 0.976014515                            | N                                            | 0                                      | N                                   |
| APBA3        | 0.976052017                            | N                                            | 0                                      | N                                   |
| RPL18AP3     | 0.976113923                            | N                                            | 0                                      | N                                   |
| LRRC37A3     | 0.976118287                            | N                                            | 0                                      | N                                   |
| AC022613.1   | 0.976253574                            | N                                            | 0                                      | N                                   |
| AC233723.2   | 0.976449183                            | N                                            | 0                                      | N                                   |
| HSPB1        | 0.976517324                            | N                                            | 34                                     | N                                   |
| UHRF1BP1L    | 0.976526869                            | N                                            | 0                                      | N                                   |
| ATXN7L3      | 0.97652722                             | N                                            | 0                                      | N                                   |
| DNASE1       | 0.97654225                             | N                                            | 5                                      | N                                   |
| LYG1         | 0.97654225                             | N                                            | 0                                      | N                                   |
| ZNF844       | 0.97654225                             | N                                            | 0                                      | N                                   |
| AC105429.1   | 0.976733159                            | N                                            | 0                                      | N                                   |
| CRCP         | 0.976733159                            | N                                            | 1                                      | N                                   |
| CRYBG1       | 0.976733159                            | N                                            | 0                                      | N                                   |
| MRPL21       | 0.976733159                            | N                                            | 0                                      | N                                   |
| UQCRH        | 0.976733159                            | N                                            | 1                                      | N                                   |
| ZNF711       | 0.976802688                            | N                                            | 0                                      | N                                   |
| OPRD1        | 0.976833387                            | N                                            | 0                                      | N                                   |
| RSBN1L       | 0.976833387                            | N                                            | 0                                      | N                                   |
| ZNRF2P1      | 0.976833387                            | N                                            | 0                                      | N                                   |
| ARHGAP44     | 0.976854706                            | N                                            | 0                                      | N                                   |
| C22orf15     | 0.976854706                            | N                                            | 0                                      | N                                   |
| HELLPAR      | 0.976854706                            | N                                            | 0                                      | N                                   |
| KCNE3        | 0.976854706                            | N                                            | 1                                      | N                                   |
| TSC22D4      | 0.976863678                            | N                                            | 1                                      | N                                   |
| CCDC25       | 0.976872994                            | N                                            | 0                                      | N                                   |
| AL138963.1   | 0.976946651                            | N                                            | 0                                      | N                                   |

| Gene symbols | FDR (differential expression analysis) | Differentially expressed gene? Y, Yes; N, No | Number of insulin related publications | Insulin related gene? Y, Yes; N, No |
|--------------|----------------------------------------|----------------------------------------------|----------------------------------------|-------------------------------------|
| AC006538.1   | 0.976984637                            | N                                            | 0                                      | N                                   |
| AC068473.3   | 0.976984637                            | N                                            | 0                                      | N                                   |
| AC096992.2   | 0.976984637                            | N                                            | 0                                      | N                                   |
| PHPT1        | 0.976984637                            | N                                            | 3                                      | N                                   |
| SMIM10L2B    | 0.976984637                            | N                                            | 0                                      | N                                   |
| TPGS1        | 0.976984637                            | N                                            | 1                                      | N                                   |
| AC004982.1   | 0.977094702                            | N                                            | 0                                      | N                                   |
| EML5         | 0.977094702                            | N                                            | 1                                      | N                                   |
| MEG9         | 0.977094702                            | N                                            | 0                                      | N                                   |
| PPM1J        | 0.977094702                            | N                                            | 0                                      | N                                   |
| TCIRG1       | 0.977094702                            | N                                            | 1                                      | N                                   |
| WDR55        | 0.97719391                             | N                                            | 0                                      | N                                   |
| AC009948.5   | 0.977209107                            | N                                            | 0                                      | N                                   |
| AC090519.1   | 0.977209107                            | N                                            | 0                                      | N                                   |
| AC093433.1   | 0.977209107                            | N                                            | 0                                      | N                                   |
| ALKBH5       | 0.977209107                            | N                                            | 0                                      | N                                   |
| AP000904.1   | 0.977209107                            | N                                            | 0                                      | N                                   |
| C8orf37      | 0.977209107                            | N                                            | 0                                      | N                                   |
| COLEC12      | 0.977209107                            | N                                            | 1                                      | N                                   |
| CRYZP1       | 0.977209107                            | N                                            | 0                                      | N                                   |
| H2AFJ        | 0.977209107                            | N                                            | 0                                      | N                                   |
| HES4         | 0.977209107                            | N                                            | 0                                      | N                                   |
| JAK3         | 0.977209107                            | N                                            | 55                                     | N                                   |
| LRRC8B       | 0.977209107                            | N                                            | 1                                      | N                                   |
| LYZ          | 0.977209107                            | N                                            | 5                                      | N                                   |
| MAGI2-IT1    | 0.977209107                            | N                                            | 0                                      | N                                   |
| MAP3K1       | 0.977209107                            | N                                            | 33                                     | N                                   |
| MATN3        | 0.977209107                            | N                                            | 0                                      | N                                   |
| MIF          | 0.977209107                            | N                                            | 144                                    | Y                                   |
| OGFOD2       | 0.977209107                            | N                                            | 0                                      | N                                   |
| RERE         | 0.977209107                            | N                                            | 1                                      | N                                   |
| RPL23AP7     | 0.977209107                            | N                                            | 0                                      | N                                   |
| SAP130       | 0.977209107                            | N                                            | 0                                      | N                                   |
| SEC13        | 0.977209107                            | N                                            | 2                                      | N                                   |
| SLC10A3      | 0.977209107                            | N                                            | 0                                      | N                                   |
| TES          | 0.977209107                            | N                                            | 26                                     | N                                   |
| ZNF467       | 0.977209107                            | N                                            | 0                                      | N                                   |
| AL159169.3   | 0.977226231                            | N                                            | 0                                      | N                                   |
| MSNP1        | 0.977267597                            | N                                            | 0                                      | N                                   |
| SLC9A6       | 0.977291735                            | N                                            | 0                                      | N                                   |
| RN7SKP202    | 0.977400662                            | N                                            | 0                                      | N                                   |
| AGAP3        | 0.977425555                            | N                                            | 2                                      | N                                   |
| CARD11       | 0.977472377                            | N                                            | 1                                      | N                                   |
| RBMX2        | 0.977596648                            | N                                            | 0                                      | N                                   |
| AC005225.5   | 0.977766744                            | N                                            | 0                                      | N                                   |
| INTS12       | 0.977766744                            | N                                            | 0                                      | N                                   |
| C15orf61     | 0.977818145                            | N                                            | 0                                      | N                                   |
| C7           | 0.977880105                            | N                                            | 40                                     | N                                   |
| AGBL2        | 0.97797331                             | N                                            | 0                                      | N                                   |
| BTF3L4       | 0.97797331                             | N                                            | 0                                      | N                                   |
| NLRC4        | 0.97797331                             | N                                            | 6                                      | N                                   |
| GPR18        | 0.978075455                            | N                                            | 0                                      | N                                   |
| RRP15        | 0.978075455                            | N                                            | 0                                      | N                                   |
| AF165147.1   | 0.978257267                            | N                                            | 0                                      | N                                   |
| AC111170.2   | 0.978305592                            | N                                            | 0                                      | N                                   |
| ANAPC13      | 0.978335684                            | N                                            | 0                                      | N                                   |
| CTNNB1       | 0.978335684                            | N                                            | 145                                    | Y                                   |
| EXOC7P1      | 0.978335684                            | N                                            | 0                                      | N                                   |
| GUCY2D       | 0.978335684                            | N                                            | 1                                      | N                                   |
| OMG          | 0.978335684                            | N                                            | 45                                     | N                                   |
| AC107214.2   | 0.978423809                            | N                                            | 0                                      | N                                   |
| SYT3         | 0.978423809                            | N                                            | 4                                      | N                                   |
| AC104581.5   | 0.978473354                            | N                                            | 0                                      | N                                   |
| GAK          | 0.978530546                            | N                                            | 3                                      | N                                   |
| TFAP2E       | 0.978530546                            | N                                            | 0                                      | N                                   |
| DDX51        | 0.978535203                            | N                                            | 1                                      | N                                   |

| Gene symbols | FDR (differential expression analysis) | Differentially expressed gene? Y, Yes; N, No | Number of insulin related publications | Insulin related gene? Y, Yes; N, No |
|--------------|----------------------------------------|----------------------------------------------|----------------------------------------|-------------------------------------|
| CCDC17       | 0.978565802                            | N                                            | 0                                      | N                                   |
| NFX1         | 0.978565802                            | N                                            | 1                                      | N                                   |
| SYCP2        | 0.978565802                            | N                                            | 0                                      | N                                   |
| AC084032.1   | 0.97868106                             | N                                            | 0                                      | N                                   |
| MAPK1        | 0.97868106                             | N                                            | 114                                    | Y                                   |
| PELI1        | 0.978731348                            | N                                            | 1                                      | N                                   |
| WBP2NL       | 0.978746846                            | N                                            | 0                                      | N                                   |
| AC013643.3   | 0.978798999                            | N                                            | 0                                      | N                                   |
| AC104446.1   | 0.978798999                            | N                                            | 0                                      | N                                   |
| COMMD7       | 0.978798999                            | N                                            | 0                                      | N                                   |
| LCMT1        | 0.978798999                            | N                                            | 2                                      | N                                   |
| POT1-AS1     | 0.978798999                            | N                                            | 0                                      | N                                   |
| SH2B1        | 0.978798999                            | N                                            | 54                                     | N                                   |
| TMEM60       | 0.978798999                            | N                                            | 0                                      | N                                   |
| TRIM25       | 0.978798999                            | N                                            | 0                                      | N                                   |
| LAP3         | 0.978801353                            | N                                            | 2                                      | N                                   |
| AL445483.1   | 0.978808731                            | N                                            | 0                                      | N                                   |
| SLC6A14      | 0.978808731                            | N                                            | 2                                      | N                                   |
| ST7-OT4      | 0.978808731                            | N                                            | 0                                      | N                                   |
| ZKSCAN2      | 0.978874344                            | N                                            | 0                                      | N                                   |
| AC023157.3   | 0.97897865                             | N                                            | 0                                      | N                                   |
| AC034229.1   | 0.97897865                             | N                                            | 0                                      | N                                   |
| ADAMTS19     | 0.97897865                             | N                                            | 1                                      | N                                   |
| EMC3         | 0.97897865                             | N                                            | 0                                      | N                                   |
| PPP1R18      | 0.97897865                             | N                                            | 0                                      | N                                   |
| SFMBT1       | 0.97897865                             | N                                            | 2                                      | N                                   |
| TEX22        | 0.97897865                             | N                                            | 0                                      | N                                   |
| CCDC13       | 0.979021616                            | N                                            | 0                                      | N                                   |
| ZNF114       | 0.979098019                            | N                                            | 0                                      | N                                   |
| EIF3C        | 0.979162192                            | N                                            | 0                                      | N                                   |
| NDUFB1       | 0.979162192                            | N                                            | 0                                      | N                                   |
| NLN          | 0.979204633                            | N                                            | 3                                      | N                                   |
| AC007038.1   | 0.979337727                            | N                                            | 0                                      | N                                   |
| DYRK2        | 0.979337727                            | N                                            | 3                                      | N                                   |
| IL15RA       | 0.979337727                            | N                                            | 4                                      | N                                   |
| NIT2         | 0.979337727                            | N                                            | 0                                      | N                                   |
| AC083798.2   | 0.97936203                             | N                                            | 0                                      | N                                   |
| PRELID3B     | 0.97936203                             | N                                            | 0                                      | N                                   |
| CERS1        | 0.979428271                            | N                                            | 11                                     | N                                   |
| NR6A1        | 0.979428271                            | N                                            | 4                                      | N                                   |
| NME3         | 0.979438342                            | N                                            | 1                                      | N                                   |
| RAC1P2       | 0.979447005                            | N                                            | 0                                      | N                                   |
| ATP6V0CP3    | 0.979669837                            | N                                            | 0                                      | N                                   |
| AC016245.1   | 0.979737879                            | N                                            | 0                                      | N                                   |
| AC092143.3   | 0.979864697                            | N                                            | 0                                      | N                                   |
| CGA          | 0.979864697                            | N                                            | 125                                    | Y                                   |
| IGHMBP2      | 0.979864697                            | N                                            | 6                                      | N                                   |
| DNAJC22      | 0.979907044                            | N                                            | 0                                      | N                                   |
| MYL8P        | 0.979968995                            | N                                            | 0                                      | N                                   |
| AL731569.1   | 0.980021934                            | N                                            | 0                                      | N                                   |
| ATP5D        | 0.980021934                            | N                                            | 1                                      | N                                   |
| CLK2         | 0.980021934                            | N                                            | 9                                      | N                                   |
| ABCC9        | 0.980115775                            | N                                            | 33                                     | N                                   |
| AC009078.2   | 0.980115775                            | N                                            | 0                                      | N                                   |
| AC010186.4   | 0.980115775                            | N                                            | 0                                      | N                                   |
| AC063926.3   | 0.980115775                            | N                                            | 0                                      | N                                   |
| AC097376.2   | 0.980115775                            | N                                            | 0                                      | N                                   |
| AC114760.2   | 0.980115775                            | N                                            | 0                                      | N                                   |
| CACNA1A      | 0.980115775                            | N                                            | 8                                      | N                                   |
| CDC42        | 0.980115775                            | N                                            | 142                                    | Y                                   |
| CDH8         | 0.980115775                            | N                                            | 0                                      | N                                   |
| FXN          | 0.980115775                            | N                                            | 13                                     | N                                   |
| HPD          | 0.980115775                            | N                                            | 38                                     | N                                   |
| LSM11        | 0.980115775                            | N                                            | 0                                      | N                                   |
| METTL6       | 0.980115775                            | N                                            | 0                                      | N                                   |
| SEC14L4      | 0.980115775                            | N                                            | 1                                      | N                                   |

| Gene symbols | FDR (differential expression analysis) | Differentially expressed gene? Y, Yes; N, No | Number of insulin related publications | Insulin related gene? Y, Yes; N, No |
|--------------|----------------------------------------|----------------------------------------------|----------------------------------------|-------------------------------------|
| SHISA2       | 0.980115775                            | N                                            | 0                                      | N                                   |
| SLC25A37     | 0.980115775                            | N                                            | 0                                      | N                                   |
| SLC39A1      | 0.980115775                            | N                                            | 5                                      | N                                   |
| TMEM191C     | 0.980115775                            | N                                            | 0                                      | N                                   |
| VPS28        | 0.980115775                            | N                                            | 0                                      | N                                   |
| LINC01527    | 0.980124186                            | N                                            | 0                                      | N                                   |
| LINC02261    | 0.980230218                            | N                                            | 0                                      | N                                   |
| RMDN3        | 0.98043494                             | N                                            | 0                                      | N                                   |
| MMP3         | 0.980538207                            | N                                            | 33                                     | N                                   |
| DPAGT1       | 0.980545118                            | N                                            | 1                                      | N                                   |
| EDEM2        | 0.980545118                            | N                                            | 0                                      | N                                   |
| NOX5         | 0.980545118                            | N                                            | 2                                      | N                                   |
| Z97180.1     | 0.980545118                            | N                                            | 0                                      | N                                   |
| KRT14        | 0.980669688                            | N                                            | 5                                      | N                                   |
| NDUFAF5      | 0.980803903                            | N                                            | 0                                      | N                                   |
| AC008158.1   | 0.980872423                            | N                                            | 0                                      | N                                   |
| AC022613.3   | 0.980872423                            | N                                            | 0                                      | N                                   |
| AC078880.3   | 0.980872423                            | N                                            | 0                                      | N                                   |
| ANO5         | 0.980872423                            | N                                            | 0                                      | N                                   |
| MEX3B        | 0.980872423                            | N                                            | 0                                      | N                                   |
| CASZ1        | 0.980889808                            | N                                            | 0                                      | N                                   |
| CUEDC2       | 0.980889808                            | N                                            | 0                                      | N                                   |
| AC046144.1   | 0.980901322                            | N                                            | 0                                      | N                                   |
| PLA2G4E      | 0.980901322                            | N                                            | 1                                      | N                                   |
| AC132825.4   | 0.980933469                            | N                                            | 0                                      | N                                   |
| AC004877.1   | 0.980947016                            | N                                            | 0                                      | N                                   |
| ALKAL2       | 0.980947016                            | N                                            | 0                                      | N                                   |
| BCYRN1       | 0.980947016                            | N                                            | 0                                      | N                                   |
| DPRXP4       | 0.980947016                            | N                                            | 0                                      | N                                   |
| KIF1C        | 0.980947016                            | N                                            | 1                                      | N                                   |
| LYPLA2       | 0.980947016                            | N                                            | 0                                      | N                                   |
| PLTP         | 0.980947016                            | N                                            | 53                                     | N                                   |
| SAP18P2      | 0.980947016                            | N                                            | 0                                      | N                                   |
| C8orf76      | 0.98094991                             | N                                            | 0                                      | N                                   |
| LINC00324    | 0.981074336                            | N                                            | 0                                      | N                                   |
| AC007319.1   | 0.981187597                            | N                                            | 0                                      | N                                   |
| AC008985.1   | 0.981187597                            | N                                            | 0                                      | N                                   |
| AC010680.3   | 0.981187597                            | N                                            | 0                                      | N                                   |
| AC011626.1   | 0.981187597                            | N                                            | 0                                      | N                                   |
| AHR          | 0.981187597                            | N                                            | 150                                    | Y                                   |
| AL050331.3   | 0.981187597                            | N                                            | 0                                      | N                                   |
| AL672296.1   | 0.981187597                            | N                                            | 0                                      | N                                   |
| BANK1        | 0.981187597                            | N                                            | 0                                      | N                                   |
| BCAS2P2      | 0.981187597                            | N                                            | 0                                      | N                                   |
| CLDN5        | 0.981187597                            | N                                            | 2                                      | N                                   |
| CNIH3        | 0.981187597                            | N                                            | 0                                      | N                                   |
| FBXL22       | 0.981187597                            | N                                            | 0                                      | N                                   |
| HMGN3-AS1    | 0.981187597                            | N                                            | 0                                      | N                                   |
| KRAS         | 0.981187597                            | N                                            | 138                                    | Y                                   |
| LINC01943    | 0.981187597                            | N                                            | 0                                      | N                                   |
| P2RX5        | 0.981187597                            | N                                            | 4                                      | N                                   |
| POTEKP       | 0.981187597                            | N                                            | 0                                      | N                                   |
| PPP6R1       | 0.981187597                            | N                                            | 0                                      | N                                   |
| RAB43P1      | 0.981187597                            | N                                            | 0                                      | N                                   |
| RUBCNL       | 0.981187597                            | N                                            | 0                                      | N                                   |
| SPATS2       | 0.981187597                            | N                                            | 0                                      | N                                   |
| TUSC2        | 0.981187597                            | N                                            | 0                                      | N                                   |
| ZNF257       | 0.981187597                            | N                                            | 0                                      | N                                   |
| FUNDC2       | 0.981233439                            | N                                            | 0                                      | N                                   |
| CST3         | 0.981331094                            | N                                            | 22                                     | N                                   |
| PITRM1       | 0.981331094                            | N                                            | 2                                      | N                                   |
| DPH6-AS1     | 0.981416804                            | N                                            | 0                                      | N                                   |
| AC099343.1   | 0.981434793                            | N                                            | 0                                      | N                                   |
| CEBPB-AS1    | 0.98157272                             | N                                            | 0                                      | N                                   |
| EMP1         | 0.98157272                             | N                                            | 0                                      | N                                   |
| AC087276.1   | 0.9815756                              | N                                            | 0                                      | N                                   |

| Gene symbols             | FDR (differential expression analysis) | Differentially expressed gene? Y, Yes; N, No | Number of insulin related publications | Insulin related gene? Y, Yes; N, No |
|--------------------------|----------------------------------------|----------------------------------------------|----------------------------------------|-------------------------------------|
| AC099791.2               | 0.9815756                              | N                                            | 0                                      | N                                   |
| AC010504.1               | 0.981584137                            | N                                            | 0                                      | N                                   |
| AL138976.2               | 0.981584137                            | N                                            | 0                                      | N                                   |
| ARHGEF18                 | 0.981584137                            | N                                            | 1                                      | N                                   |
| ATXN2L                   | 0.981584137                            | N                                            | 0                                      | N                                   |
| C2orf68                  | 0.981584137                            | N                                            | 0                                      | N                                   |
| NADK                     | 0.981584137                            | N                                            | 2                                      | N                                   |
| NOL8                     | 0.981584137                            | N                                            | 0                                      | N                                   |
| SHARPIN                  | 0.981584137                            | N                                            | 0                                      | N                                   |
| ZNF565                   | 0.981584137                            | N                                            | 0                                      | N                                   |
| ZNF736                   | 0.981584137                            | N                                            | 0                                      | N                                   |
| AC139256.1               | 0.981622068                            | N                                            | 0                                      | N                                   |
| AHCY                     | 0.981622068                            | N                                            | 4                                      | N                                   |
| AL136304.1               | 0.981622068                            | N                                            | 0                                      | N                                   |
| AP000347.1               | 0.981622068                            | N                                            | 0                                      | N                                   |
| AP002004.1               | 0.981622068                            | N                                            | 0                                      | N                                   |
| ASAH2                    | 0.981622068                            | N                                            | 2                                      | N                                   |
| CCDC93                   | 0.981622068                            | N                                            | 0                                      | N                                   |
| CCND1                    | 0.981622068                            | N                                            | 114                                    | Y                                   |
| CEP112                   | 0.981622068                            | N                                            | 0                                      | N                                   |
| DDX52                    | 0.981622068                            | N                                            | 0                                      | N                                   |
| FEM1C                    | 0.981622068                            | N                                            | 1                                      | N                                   |
| HMGB1P21                 | 0.981622068                            | N                                            | 0                                      | N                                   |
| HPS6                     | 0.981622068                            | N                                            | 0                                      | N                                   |
| JAG2                     | 0.981622068                            | N                                            | 3                                      | N                                   |
| LSINCT5                  | 0.981622068                            | N                                            | 0                                      | N                                   |
| NPC1                     | 0.981622068                            | N                                            | 15                                     | N                                   |
| PLAC4                    | 0.981622068                            | N                                            | 0                                      | N                                   |
| RAB33A                   | 0.981622068                            | N                                            | 0                                      | N                                   |
| RSAD1                    | 0.981622068                            | N                                            | 0                                      | N                                   |
| RSF1-IT2                 | 0.981622068                            | N                                            | 0                                      | N                                   |
| SMG9                     | 0.981622068                            | N                                            | 0                                      | N                                   |
| SYT17                    | 0.981622068                            | N                                            | 0                                      | N                                   |
| TAF6                     | 0.981622068                            | N                                            | 1                                      | N                                   |
| TMEM215                  | 0.981622068                            | N                                            | 0                                      | N                                   |
| TOB2P1                   | 0.981622068                            | N                                            | 0                                      | N                                   |
| ZNF777                   | 0.981622068                            | N                                            | 0                                      | N                                   |
| ANGEL2                   | 0.981626888                            | N                                            | 0                                      | N                                   |
| ARHGAP27P1-BPTFP1-KPNA2F | 0.981626888                            | N                                            | 0                                      | N                                   |
| CYSRT1                   | 0.981665037                            | N                                            | 0                                      | N                                   |
| AC025171.4               | 0.981693094                            | N                                            | 0                                      | N                                   |
| AC083805.1               | 0.981693094                            | N                                            | 0                                      | N                                   |
| ATF7IP2                  | 0.981693094                            | N                                            | 0                                      | N                                   |
| FAM204BP                 | 0.981693094                            | N                                            | 0                                      | N                                   |
| NDUFA3                   | 0.981693094                            | N                                            | 0                                      | N                                   |
| SLC2A5                   | 0.981693094                            | N                                            | 16                                     | N                                   |
| SNORA2B                  | 0.981761681                            | N                                            | 0                                      | N                                   |
| AC009318.2               | 0.981834883                            | N                                            | 0                                      | N                                   |
| C5orf56                  | 0.981834883                            | N                                            | 0                                      | N                                   |
| ZNF891                   | 0.981834883                            | N                                            | 0                                      | N                                   |
| AC015982.1               | 0.981850063                            | N                                            | 0                                      | N                                   |
| RRAD                     | 0.981957189                            | N                                            | 11                                     | N                                   |
| RPP14                    | 0.982015185                            | N                                            | 0                                      | N                                   |
| AC011773.4               | 0.982129276                            | N                                            | 0                                      | N                                   |
| AL512782.1               | 0.98221715                             | N                                            | 0                                      | N                                   |
| CLDN18                   | 0.98221715                             | N                                            | 3                                      | N                                   |
| ACSF3                    | 0.98223366                             | N                                            | 0                                      | N                                   |
| MARCH1                   | 0.982270104                            | N                                            | 2                                      | N                                   |
| AC008763.3               | 0.982270104                            | N                                            | 0                                      | N                                   |
| EVC2                     | 0.982270104                            | N                                            | 1                                      | N                                   |
| FAM207A                  | 0.982270104                            | N                                            | 0                                      | N                                   |
| FAM57A                   | 0.982270104                            | N                                            | 0                                      | N                                   |
| HIBCH                    | 0.982270104                            | N                                            | 0                                      | N                                   |
| HSPA9                    | 0.982270104                            | N                                            | 0                                      | N                                   |
| PPP2R2DP1                | 0.982270104                            | N                                            | 0                                      | N                                   |
| RPS6KA3                  | 0.982270104                            | N                                            | 1                                      | N                                   |



| Gene symbols | FDR (differential expression analysis) | Differentially expressed gene? Y, Yes; N, No | Number of insulin related publications | Insulin related gene? Y, Yes; N, No |
|--------------|----------------------------------------|----------------------------------------------|----------------------------------------|-------------------------------------|
| RPS8         | 0.982270104                            | N                                            | 0                                      | N                                   |
| TSPAN2       | 0.982270104                            | N                                            | 2                                      | N                                   |
| ZC3H12A      | 0.982270104                            | N                                            | 1                                      | N                                   |
| AP005329.3   | 0.982459366                            | N                                            | 0                                      | N                                   |
| LINC01291    | 0.982486497                            | N                                            | 0                                      | N                                   |
| PLIN1        | 0.982561249                            | N                                            | 50                                     | N                                   |
| GPR132       | 0.982609345                            | N                                            | 1                                      | N                                   |
| NOB1         | 0.982609345                            | N                                            | 5                                      | N                                   |
| ZNF598       | 0.982609345                            | N                                            | 0                                      | N                                   |
| AC006927.1   | 0.982656959                            | N                                            | 0                                      | N                                   |
| TXN2         | 0.982722483                            | N                                            | 2                                      | N                                   |
| AC005183.1   | 0.982725603                            | N                                            | 0                                      | N                                   |
| AC090360.1   | 0.982725603                            | N                                            | 0                                      | N                                   |
| AP001885.1   | 0.982725603                            | N                                            | 0                                      | N                                   |
| RP11-60L3.1  | 0.982740717                            | N                                            | 0                                      | N                                   |
| AC016065.1   | 0.982790811                            | N                                            | 0                                      | N                                   |
| NKTR         | 0.982790811                            | N                                            | 0                                      | N                                   |
| LCT          | 0.982822834                            | N                                            | 98                                     | N                                   |
| RPL11        | 0.982822834                            | N                                            | 1                                      | N                                   |
| EIF3J-AS1    | 0.982840271                            | N                                            | 0                                      | N                                   |
| MAFG         | 0.98287762                             | N                                            | 5                                      | N                                   |
| ELL          | 0.98291685                             | N                                            | 7                                      | N                                   |
| MYO9A        | 0.98291685                             | N                                            | 0                                      | N                                   |
| SNX10        | 0.98291685                             | N                                            | 1                                      | N                                   |
| AL354977.2   | 0.982981458                            | N                                            | 0                                      | N                                   |
| BSCL2        | 0.982981458                            | N                                            | 70                                     | N                                   |
| CUL9         | 0.982981458                            | N                                            | 0                                      | N                                   |
| RPL30P4      | 0.982981458                            | N                                            | 0                                      | N                                   |
| TBC1D23      | 0.982981458                            | N                                            | 0                                      | N                                   |
| AC026471.2   | 0.983056635                            | N                                            | 0                                      | N                                   |
| AC092747.2   | 0.983056635                            | N                                            | 0                                      | N                                   |
| ANKRD2       | 0.983056635                            | N                                            | 2                                      | N                                   |
| CRAMP1       | 0.983056635                            | N                                            | 0                                      | N                                   |
| FKRP         | 0.983056635                            | N                                            | 0                                      | N                                   |
| KCND2        | 0.983056635                            | N                                            | 4                                      | N                                   |
| POLR1A       | 0.983056635                            | N                                            | 1                                      | N                                   |
| UQCRC2       | 0.983056635                            | N                                            | 2                                      | N                                   |
| ZNF550       | 0.983056635                            | N                                            | 0                                      | N                                   |
| RALYL        | 0.983112199                            | N                                            | 1                                      | N                                   |
| AC079238.1   | 0.983159403                            | N                                            | 0                                      | N                                   |
| GPR61        | 0.983159403                            | N                                            | 3                                      | N                                   |
| MRPL33       | 0.98318368                             | N                                            | 1                                      | N                                   |
| FAM83H       | 0.983202847                            | N                                            | 0                                      | N                                   |
| AC022107.1   | 0.983203984                            | N                                            | 0                                      | N                                   |
| AL354702.1   | 0.983203984                            | N                                            | 0                                      | N                                   |
| HSCB         | 0.983302859                            | N                                            | 0                                      | N                                   |
| OPLAH        | 0.983393202                            | N                                            | 0                                      | N                                   |
| ZDHHC8       | 0.983395392                            | N                                            | 0                                      | N                                   |
| GALNT16      | 0.983425709                            | N                                            | 1                                      | N                                   |
| LINC00608    | 0.983425709                            | N                                            | 0                                      | N                                   |
| RP11-295P9.8 | 0.983425709                            | N                                            | 0                                      | N                                   |
| AC008033.3   | 0.983443445                            | N                                            | 0                                      | N                                   |
| AC090502.1   | 0.983443445                            | N                                            | 0                                      | N                                   |
| AL136520.1   | 0.983443445                            | N                                            | 0                                      | N                                   |
| EPCAM        | 0.983443445                            | N                                            | 69                                     | N                                   |
| RPS19P3      | 0.983443445                            | N                                            | 0                                      | N                                   |
| THAP7-AS1    | 0.983443445                            | N                                            | 0                                      | N                                   |
| TPD52L2      | 0.983443445                            | N                                            | 0                                      | N                                   |
| Z73965.1     | 0.983443445                            | N                                            | 0                                      | N                                   |
| AC104297.1   | 0.983487258                            | N                                            | 0                                      | N                                   |
| CCDC162P     | 0.983549                               | N                                            | 0                                      | N                                   |
| CNKSR3       | 0.983624676                            | N                                            | 0                                      | N                                   |
| EVA1B        | 0.983624676                            | N                                            | 0                                      | N                                   |
| RPL23AP57    | 0.98365097                             | N                                            | 0                                      | N                                   |
| ACBD4        | 0.983681271                            | N                                            | 0                                      | N                                   |
| DBNL         | 0.983681271                            | N                                            | 0                                      | N                                   |

| Gene symbols | FDR (differential expression analysis) | Differentially expressed gene? Y, Yes; N, No | Number of insulin related publications | Insulin related gene? Y, Yes; N, No |
|--------------|----------------------------------------|----------------------------------------------|----------------------------------------|-------------------------------------|
| GSK3A        | 0.983681271                            | N                                            | 4                                      | N                                   |
| LINC01299    | 0.983681271                            | N                                            | 0                                      | N                                   |
| MAP1S        | 0.983681271                            | N                                            | 0                                      | N                                   |
| NBEAL2       | 0.983763161                            | N                                            | 0                                      | N                                   |
| GYG2         | 0.983918261                            | N                                            | 1                                      | N                                   |
| CEP104       | 0.984148542                            | N                                            | 0                                      | N                                   |
| GFOD1        | 0.984148542                            | N                                            | 0                                      | N                                   |
| SHF          | 0.984148542                            | N                                            | 28                                     | N                                   |
| AP006248.4   | 0.984258902                            | N                                            | 0                                      | N                                   |
| C8orf33      | 0.984258902                            | N                                            | 0                                      | N                                   |
| FAM133B      | 0.984258902                            | N                                            | 0                                      | N                                   |
| GALNT12      | 0.984258902                            | N                                            | 0                                      | N                                   |
| GPC4         | 0.984258902                            | N                                            | 9                                      | N                                   |
| ZFHX4-AS1    | 0.984258902                            | N                                            | 0                                      | N                                   |
| HNF4G        | 0.984280507                            | N                                            | 3                                      | N                                   |
| TAGLN2P1     | 0.984327453                            | N                                            | 0                                      | N                                   |
| ANKRD26P1    | 0.984376862                            | N                                            | 0                                      | N                                   |
| C17orf62     | 0.984468067                            | N                                            | 0                                      | N                                   |
| FOXB1        | 0.984468067                            | N                                            | 2                                      | N                                   |
| AC011472.4   | 0.984492649                            | N                                            | 0                                      | N                                   |
| MFSD2B       | 0.984492649                            | N                                            | 0                                      | N                                   |
| PRICKLE2-AS1 | 0.984492649                            | N                                            | 0                                      | N                                   |
| STAC         | 0.984492649                            | N                                            | 2                                      | N                                   |
| TARBP1       | 0.984492649                            | N                                            | 0                                      | N                                   |
| Z93022.1     | 0.984492649                            | N                                            | 0                                      | N                                   |
| TAF1         | 0.984638571                            | N                                            | 2                                      | N                                   |
| AL590999.1   | 0.984655005                            | N                                            | 0                                      | N                                   |
| KCNC3        | 0.984655005                            | N                                            | 1                                      | N                                   |
| SPRY4-IT1    | 0.984659918                            | N                                            | 0                                      | N                                   |
| AL353743.1   | 0.984680923                            | N                                            | 0                                      | N                                   |
| SIGIRR       | 0.984762394                            | N                                            | 0                                      | N                                   |
| AL035467.1   | 0.984776061                            | N                                            | 0                                      | N                                   |
| TRIM73       | 0.984776061                            | N                                            | 0                                      | N                                   |
| TTC28-AS1    | 0.984776061                            | N                                            | 0                                      | N                                   |
| AL590065.1   | 0.984879169                            | N                                            | 0                                      | N                                   |
| AL731661.1   | 0.984879169                            | N                                            | 0                                      | N                                   |
| COPE         | 0.984879169                            | N                                            | 732                                    | Y                                   |
| RASA3        | 0.984879169                            | N                                            | 0                                      | N                                   |
| AC008945.2   | 0.984883196                            | N                                            | 0                                      | N                                   |
| AL132656.1   | 0.984883196                            | N                                            | 0                                      | N                                   |
| AL137784.2   | 0.984883196                            | N                                            | 0                                      | N                                   |
| ANKRD40      | 0.984883196                            | N                                            | 0                                      | N                                   |
| APTR         | 0.984883196                            | N                                            | 1                                      | N                                   |
| ATG4AP1      | 0.984883196                            | N                                            | 0                                      | N                                   |
| EIF3J        | 0.984883196                            | N                                            | 0                                      | N                                   |
| GPR39        | 0.984883196                            | N                                            | 25                                     | N                                   |
| IMPDH1       | 0.984883196                            | N                                            | 2                                      | N                                   |
| LY6E         | 0.984883196                            | N                                            | 2                                      | N                                   |
| SNORA38      | 0.984883196                            | N                                            | 0                                      | N                                   |
| UQCR11       | 0.984883196                            | N                                            | 0                                      | N                                   |
| ZFPM2        | 0.984883196                            | N                                            | 6                                      | N                                   |
| ZNF331       | 0.984883196                            | N                                            | 0                                      | N                                   |
| MED28P3      | 0.984890759                            | N                                            | 0                                      | N                                   |
| SFTPB        | 0.985004645                            | N                                            | 3                                      | N                                   |
| APCDD1L-AS1  | 0.985233254                            | N                                            | 0                                      | N                                   |
| ATP5C1       | 0.985233254                            | N                                            | 3                                      | N                                   |
| RGN          | 0.985284242                            | N                                            | 29                                     | N                                   |
| FP325330.2   | 0.985427021                            | N                                            | 0                                      | N                                   |
| PPIL2        | 0.985440233                            | N                                            | 1                                      | N                                   |
| AC011676.5   | 0.985454327                            | N                                            | 0                                      | N                                   |
| AC012313.10  | 0.985454327                            | N                                            | 0                                      | N                                   |
| AC018737.2   | 0.985454327                            | N                                            | 0                                      | N                                   |
| AC018926.2   | 0.985454327                            | N                                            | 0                                      | N                                   |
| AC024451.4   | 0.985454327                            | N                                            | 0                                      | N                                   |
| AC069224.1   | 0.985454327                            | N                                            | 0                                      | N                                   |
| AC073065.1   | 0.985454327                            | N                                            | 0                                      | N                                   |

| Gene symbols | FDR (differential expression analysis) | Differentially expressed gene? Y, Yes; N, No | Number of insulin related publications | Insulin related gene? Y, Yes; N, No |
|--------------|----------------------------------------|----------------------------------------------|----------------------------------------|-------------------------------------|
| AC090948.1   | 0.985454327                            | N                                            | 0                                      | N                                   |
| AC090950.1   | 0.985454327                            | N                                            | 0                                      | N                                   |
| AC093827.2   | 0.985454327                            | N                                            | 0                                      | N                                   |
| AC098850.2   | 0.985454327                            | N                                            | 0                                      | N                                   |
| AC098850.4   | 0.985454327                            | N                                            | 0                                      | N                                   |
| AC104472.1   | 0.985454327                            | N                                            | 0                                      | N                                   |
| ACTR3P2      | 0.985454327                            | N                                            | 0                                      | N                                   |
| AL161669.3   | 0.985454327                            | N                                            | 0                                      | N                                   |
| AL772337.3   | 0.985454327                            | N                                            | 0                                      | N                                   |
| AP001020.2   | 0.985454327                            | N                                            | 0                                      | N                                   |
| CAT          | 0.985454327                            | N                                            | 1000                                   | Y                                   |
| CCDC90B      | 0.985454327                            | N                                            | 0                                      | N                                   |
| CCND3        | 0.985454327                            | N                                            | 28                                     | N                                   |
| DMD          | 0.985454327                            | N                                            | 71                                     | N                                   |
| DRP2         | 0.985454327                            | N                                            | 0                                      | N                                   |
| EPHB1        | 0.985454327                            | N                                            | 3                                      | N                                   |
| FGF5         | 0.985454327                            | N                                            | 12                                     | N                                   |
| FPR1         | 0.985454327                            | N                                            | 2                                      | N                                   |
| GCA          | 0.985454327                            | N                                            | 27                                     | N                                   |
| GCNT2        | 0.985454327                            | N                                            | 2                                      | N                                   |
| GUSBP11      | 0.985454327                            | N                                            | 0                                      | N                                   |
| HMCN1        | 0.985454327                            | N                                            | 1                                      | N                                   |
| HSF1         | 0.985454327                            | N                                            | 38                                     | N                                   |
| LAIR1        | 0.985454327                            | N                                            | 0                                      | N                                   |
| MOSPD3       | 0.985454327                            | N                                            | 0                                      | N                                   |
| NDUFB10P1    | 0.985454327                            | N                                            | 0                                      | N                                   |
| RAB11B       | 0.985454327                            | N                                            | 1                                      | N                                   |
| SCAPER       | 0.985454327                            | N                                            | 0                                      | N                                   |
| SOX9         | 0.985454327                            | N                                            | 177                                    | Y                                   |
| THAP4        | 0.985454327                            | N                                            | 0                                      | N                                   |
| USP43        | 0.985454327                            | N                                            | 0                                      | N                                   |
| VPS33B       | 0.985454327                            | N                                            | 0                                      | N                                   |
| ZNF124       | 0.985454327                            | N                                            | 0                                      | N                                   |
| ZNF418       | 0.985454327                            | N                                            | 0                                      | N                                   |
| AK1          | 0.985473877                            | N                                            | 7                                      | N                                   |
| RIPK1        | 0.985473877                            | N                                            | 9                                      | N                                   |
| TRIM67       | 0.985473877                            | N                                            | 0                                      | N                                   |
| TSLP         | 0.985473877                            | N                                            | 4                                      | N                                   |
| STMND1       | 0.985725778                            | N                                            | 0                                      | N                                   |
| PCOTH        | 0.985729075                            | N                                            | 0                                      | N                                   |
| STAT1        | 0.98575355                             | N                                            | 208                                    | Y                                   |
| AC023934.1   | 0.985813051                            | N                                            | 0                                      | N                                   |
| AC098614.1   | 0.985813051                            | N                                            | 0                                      | N                                   |
| PKDREJ       | 0.985813051                            | N                                            | 0                                      | N                                   |
| SMDT1        | 0.985813051                            | N                                            | 0                                      | N                                   |
| AL583810.2   | 0.985879695                            | N                                            | 0                                      | N                                   |
| AC021074.1   | 0.985964333                            | N                                            | 0                                      | N                                   |
| NDUFC2       | 0.985964333                            | N                                            | 2                                      | N                                   |
| TMPRSS5      | 0.985964333                            | N                                            | 1                                      | N                                   |
| AC011592.1   | 0.986028304                            | N                                            | 0                                      | N                                   |
| APOOP4       | 0.986028304                            | N                                            | 0                                      | N                                   |
| BEX5         | 0.986028304                            | N                                            | 0                                      | N                                   |
| EPC2         | 0.986028304                            | N                                            | 2                                      | N                                   |
| MS4A6A       | 0.986028304                            | N                                            | 0                                      | N                                   |
| RN7SL127P    | 0.986028304                            | N                                            | 0                                      | N                                   |
| STT3B        | 0.986074676                            | N                                            | 1                                      | N                                   |
| TMEM234      | 0.986074676                            | N                                            | 0                                      | N                                   |
| BLZF1        | 0.986128491                            | N                                            | 0                                      | N                                   |
| AC010809.1   | 0.986172663                            | N                                            | 0                                      | N                                   |
| Metazoa_SRP  | 0.986172663                            | N                                            | 0                                      | N                                   |
| PYURF        | 0.986172663                            | N                                            | 0                                      | N                                   |
| TIPARP       | 0.986172663                            | N                                            | 0                                      | N                                   |
| FAIM2        | 0.986220345                            | N                                            | 5                                      | N                                   |
| FAS-AS1      | 0.986220345                            | N                                            | 0                                      | N                                   |
| GNG2         | 0.986220345                            | N                                            | 1                                      | N                                   |
| RBM26-AS1    | 0.98631301                             | N                                            | 0                                      | N                                   |

| Gene symbols | FDR (differential expression analysis) | Differentially expressed gene? Y, Yes; N, No | Number of insulin related publications | Insulin related gene? Y, Yes; N, No |
|--------------|----------------------------------------|----------------------------------------------|----------------------------------------|-------------------------------------|
| RN7SL113P    | 0.986352699                            | N                                            | 0                                      | N                                   |
| AL031282.2   | 0.986368918                            | N                                            | 0                                      | N                                   |
| VDAC2        | 0.986368918                            | N                                            | 2                                      | N                                   |
| DDX25        | 0.98654676                             | N                                            | 0                                      | N                                   |
| AC003986.3   | 0.986558934                            | N                                            | 0                                      | N                                   |
| PPP4R2       | 0.986558934                            | N                                            | 0                                      | N                                   |
| PTDSS2       | 0.986558934                            | N                                            | 1                                      | N                                   |
| ZNF532       | 0.986558934                            | N                                            | 0                                      | N                                   |
| EIF3G        | 0.986581899                            | N                                            | 0                                      | N                                   |
| SLC22A13     | 0.986581899                            | N                                            | 0                                      | N                                   |
| SNORA71A     | 0.986581899                            | N                                            | 0                                      | N                                   |
| AC011365.1   | 0.986702919                            | N                                            | 0                                      | N                                   |
| ZNF517       | 0.986702919                            | N                                            | 0                                      | N                                   |
| AL021707.3   | 0.986724235                            | N                                            | 0                                      | N                                   |
| SETP12       | 0.986840698                            | N                                            | 0                                      | N                                   |
| AC008507.2   | 0.986844584                            | N                                            | 0                                      | N                                   |
| AC021723.1   | 0.986890736                            | N                                            | 0                                      | N                                   |
| AC079331.2   | 0.986890736                            | N                                            | 0                                      | N                                   |
| ARL2BPP3     | 0.986890736                            | N                                            | 0                                      | N                                   |
| NFIC         | 0.98690352                             | N                                            | 4                                      | N                                   |
| AL354877.1   | 0.986971802                            | N                                            | 0                                      | N                                   |
| LNX2         | 0.986971802                            | N                                            | 0                                      | N                                   |
| AC005037.1   | 0.987017585                            | N                                            | 0                                      | N                                   |
| AC092111.1   | 0.987017585                            | N                                            | 0                                      | N                                   |
| AC096564.1   | 0.987017585                            | N                                            | 0                                      | N                                   |
| ALDH16A1     | 0.987017585                            | N                                            | 0                                      | N                                   |
| AP001020.3   | 0.987017585                            | N                                            | 0                                      | N                                   |
| CXADR        | 0.987017585                            | N                                            | 1                                      | N                                   |
| DLL3         | 0.987017585                            | N                                            | 1                                      | N                                   |
| DNAJC1       | 0.987017585                            | N                                            | 1                                      | N                                   |
| KATNAL2      | 0.987017585                            | N                                            | 0                                      | N                                   |
| MTPAP        | 0.987017585                            | N                                            | 0                                      | N                                   |
| NDUFA4       | 0.987017585                            | N                                            | 1                                      | N                                   |
| NDUFB1P1     | 0.987017585                            | N                                            | 0                                      | N                                   |
| SLC12A7      | 0.987017585                            | N                                            | 4                                      | N                                   |
| SLC30A3      | 0.987017585                            | N                                            | 3                                      | N                                   |
| SLIT2        | 0.987017585                            | N                                            | 7                                      | N                                   |
| SUMO1        | 0.987017585                            | N                                            | 38                                     | N                                   |
| TCF7L1       | 0.987017585                            | N                                            | 30                                     | N                                   |
| WASHC2A      | 0.987017585                            | N                                            | 1                                      | N                                   |
| XDH          | 0.987017585                            | N                                            | 8                                      | N                                   |
| ZBTB7C       | 0.987017585                            | N                                            | 1                                      | N                                   |
| ZNF324B      | 0.987017585                            | N                                            | 0                                      | N                                   |
| ZNF486       | 0.987017585                            | N                                            | 0                                      | N                                   |
| AC021224.1   | 0.987076735                            | N                                            | 0                                      | N                                   |
| AC244021.1   | 0.987076735                            | N                                            | 0                                      | N                                   |
| ATXN1L       | 0.987076735                            | N                                            | 0                                      | N                                   |
| IRF9         | 0.987076735                            | N                                            | 3                                      | N                                   |
| PITPNM1      | 0.987076735                            | N                                            | 0                                      | N                                   |
| RGS17P1      | 0.987076735                            | N                                            | 0                                      | N                                   |
| AC015804.1   | 0.987143139                            | N                                            | 0                                      | N                                   |
| ALDH1A2      | 0.987143139                            | N                                            | 3                                      | N                                   |
| GRIN3A       | 0.987143139                            | N                                            | 1                                      | N                                   |
| LINC00941    | 0.987143139                            | N                                            | 0                                      | N                                   |
| AC004817.3   | 0.987191696                            | N                                            | 0                                      | N                                   |
| AC023232.1   | 0.987191696                            | N                                            | 0                                      | N                                   |
| AC037198.3   | 0.987191696                            | N                                            | 0                                      | N                                   |
| AC104849.1   | 0.987191696                            | N                                            | 0                                      | N                                   |
| AL022341.2   | 0.987191696                            | N                                            | 0                                      | N                                   |
| AL391152.1   | 0.987191696                            | N                                            | 0                                      | N                                   |
| AL451074.2   | 0.987191696                            | N                                            | 0                                      | N                                   |
| ARL17A       | 0.987191696                            | N                                            | 0                                      | N                                   |
| CDCP1        | 0.987191696                            | N                                            | 2                                      | N                                   |
| FAM133CP     | 0.987191696                            | N                                            | 0                                      | N                                   |
| LIN37        | 0.987191696                            | N                                            | 0                                      | N                                   |
| LINS1        | 0.987191696                            | N                                            | 0                                      | N                                   |

| Gene symbols | FDR (differential expression analysis) | Differentially expressed gene? Y, Yes; N, No | Number of insulin related publications | Insulin related gene? Y, Yes; N, No |
|--------------|----------------------------------------|----------------------------------------------|----------------------------------------|-------------------------------------|
| PDE2A        | 0.987191696                            | N                                            | 3                                      | N                                   |
| PLXND1       | 0.987191696                            | N                                            | 5                                      | N                                   |
| PTPRN        | 0.987191696                            | N                                            | 192                                    | Y                                   |
| RPLP0P6      | 0.987191696                            | N                                            | 0                                      | N                                   |
| RRS1-AS1     | 0.987191696                            | N                                            | 0                                      | N                                   |
| SBNO2        | 0.987191696                            | N                                            | 0                                      | N                                   |
| SLAMF7       | 0.987191696                            | N                                            | 1                                      | N                                   |
| SMIM27       | 0.987191696                            | N                                            | 0                                      | N                                   |
| SRP19        | 0.987191696                            | N                                            | 0                                      | N                                   |
| AC020915.4   | 0.987227581                            | N                                            | 0                                      | N                                   |
| AC116096.1   | 0.987227581                            | N                                            | 0                                      | N                                   |
| AC242426.1   | 0.987227581                            | N                                            | 0                                      | N                                   |
| AL034374.2   | 0.987227581                            | N                                            | 0                                      | N                                   |
| AL137786.1   | 0.987227581                            | N                                            | 0                                      | N                                   |
| AL355075.4   | 0.987227581                            | N                                            | 0                                      | N                                   |
| C2           | 0.987227581                            | N                                            | 491                                    | Y                                   |
| CADM4        | 0.987227581                            | N                                            | 0                                      | N                                   |
| CALB1        | 0.987227581                            | N                                            | 11                                     | N                                   |
| CDKN2B-AS1   | 0.987227581                            | N                                            | 0                                      | N                                   |
| COX7B        | 0.987227581                            | N                                            | 2                                      | N                                   |
| EEF1B2P3     | 0.987227581                            | N                                            | 0                                      | N                                   |
| FOXF1        | 0.987227581                            | N                                            | 2                                      | N                                   |
| FREM3        | 0.987227581                            | N                                            | 0                                      | N                                   |
| GRIK2        | 0.987227581                            | N                                            | 3                                      | N                                   |
| HYPK         | 0.987227581                            | N                                            | 0                                      | N                                   |
| JAGN1        | 0.987227581                            | N                                            | 1                                      | N                                   |
| MGAT3        | 0.987227581                            | N                                            | 1                                      | N                                   |
| NIFK         | 0.987227581                            | N                                            | 0                                      | N                                   |
| P2RY6        | 0.987227581                            | N                                            | 0                                      | N                                   |
| PEX14        | 0.987227581                            | N                                            | 0                                      | N                                   |
| PTPN23       | 0.987227581                            | N                                            | 0                                      | N                                   |
| RDH5         | 0.987227581                            | N                                            | 1                                      | N                                   |
| RNF167       | 0.987227581                            | N                                            | 0                                      | N                                   |
| RPE          | 0.987227581                            | N                                            | 176                                    | Y                                   |
| STXBP5-AS1   | 0.987227581                            | N                                            | 0                                      | N                                   |
| SYT5         | 0.987227581                            | N                                            | 2                                      | N                                   |
| TATDN1P1     | 0.987227581                            | N                                            | 0                                      | N                                   |
| TMEM202-AS1  | 0.987227581                            | N                                            | 0                                      | N                                   |
| TP53I13      | 0.987227581                            | N                                            | 0                                      | N                                   |
| ZNF430       | 0.987227581                            | N                                            | 0                                      | N                                   |
| ZNF816       | 0.987227581                            | N                                            | 0                                      | N                                   |
| DENND6A      | 0.987240652                            | N                                            | 0                                      | N                                   |
| AP003355.1   | 0.987251169                            | N                                            | 0                                      | N                                   |
| GFM2         | 0.987384948                            | N                                            | 1                                      | N                                   |
| NUS1P1       | 0.987384948                            | N                                            | 0                                      | N                                   |
| AL133351.4   | 0.987581228                            | N                                            | 0                                      | N                                   |
| KANTR        | 0.987638512                            | N                                            | 0                                      | N                                   |
| KRBA1        | 0.987638512                            | N                                            | 0                                      | N                                   |
| MUSK         | 0.987638512                            | N                                            | 23                                     | N                                   |
| ZNF267       | 0.987638512                            | N                                            | 0                                      | N                                   |
| AKT3-IT1     | 0.987756792                            | N                                            | 0                                      | N                                   |
| LINC01446    | 0.987756792                            | N                                            | 0                                      | N                                   |
| AC000120.1   | 0.987906465                            | N                                            | 0                                      | N                                   |
| CAPRIN2      | 0.987906465                            | N                                            | 0                                      | N                                   |
| INTS5        | 0.987906465                            | N                                            | 0                                      | N                                   |
| ELF4         | 0.988246113                            | N                                            | 1                                      | N                                   |
| AC004691.2   | 0.98825946                             | N                                            | 0                                      | N                                   |
| AC073283.1   | 0.98825946                             | N                                            | 0                                      | N                                   |
| DDOST        | 0.98825946                             | N                                            | 3                                      | N                                   |
| TMEM161B     | 0.98825946                             | N                                            | 0                                      | N                                   |
| AL162724.1   | 0.988344484                            | N                                            | 0                                      | N                                   |
| FAM200A      | 0.98835777                             | N                                            | 0                                      | N                                   |
| AC022743.1   | 0.988393814                            | N                                            | 0                                      | N                                   |
| FBXL15       | 0.988393814                            | N                                            | 0                                      | N                                   |
| MRPS36P1     | 0.988393814                            | N                                            | 0                                      | N                                   |
| NCR3LG1      | 0.988393814                            | N                                            | 0                                      | N                                   |

| Gene symbols | FDR (differential expression analysis) | Differentially expressed gene? Y, Yes; N, No | Number of insulin related publications | Insulin related gene? Y, Yes; N, No |
|--------------|----------------------------------------|----------------------------------------------|----------------------------------------|-------------------------------------|
| AC008677.2   | 0.988437193                            | N                                            | 0                                      | N                                   |
| AC105245.1   | 0.988437193                            | N                                            | 0                                      | N                                   |
| AP4E1        | 0.988437193                            | N                                            | 0                                      | N                                   |
| PPRC1        | 0.988437193                            | N                                            | 0                                      | N                                   |
| SCARNA6      | 0.988437193                            | N                                            | 0                                      | N                                   |
| TBCC         | 0.988437193                            | N                                            | 0                                      | N                                   |
| AC055713.1   | 0.988517391                            | N                                            | 0                                      | N                                   |
| C2orf69P2    | 0.988517391                            | N                                            | 0                                      | N                                   |
| IQCE         | 0.988517391                            | N                                            | 0                                      | N                                   |
| LINC01273    | 0.988517391                            | N                                            | 0                                      | N                                   |
| SPRED3       | 0.988517391                            | N                                            | 0                                      | N                                   |
| TWF2         | 0.988517391                            | N                                            | 0                                      | N                                   |
| ZC3H14       | 0.988588839                            | N                                            | 0                                      | N                                   |
| ZSCAN21      | 0.988603415                            | N                                            | 0                                      | N                                   |
| APBA1        | 0.988625616                            | N                                            | 2                                      | N                                   |
| FSD1L        | 0.988651475                            | N                                            | 0                                      | N                                   |
| NAT14        | 0.988788968                            | N                                            | 0                                      | N                                   |
| AL929236.1   | 0.988796684                            | N                                            | 0                                      | N                                   |
| AC132872.4   | 0.988814386                            | N                                            | 0                                      | N                                   |
| APOBEC3C     | 0.988814386                            | N                                            | 0                                      | N                                   |
| LINC01679    | 0.988814386                            | N                                            | 0                                      | N                                   |
| AC137527.1   | 0.988858864                            | N                                            | 0                                      | N                                   |
| NTN1         | 0.988858864                            | N                                            | 13                                     | N                                   |
| PRR29-AS1    | 0.988858864                            | N                                            | 0                                      | N                                   |
| TEKT4        | 0.988858864                            | N                                            | 0                                      | N                                   |
| AC079598.2   | 0.988893499                            | N                                            | 0                                      | N                                   |
| TEKT4P2      | 0.988913111                            | N                                            | 0                                      | N                                   |
| TWSG1        | 0.988913111                            | N                                            | 0                                      | N                                   |
| AC004241.3   | 0.988930781                            | N                                            | 0                                      | N                                   |
| DCTN2        | 0.988930781                            | N                                            | 0                                      | N                                   |
| ID2-AS1      | 0.988930781                            | N                                            | 0                                      | N                                   |
| KIAA0040     | 0.988930781                            | N                                            | 0                                      | N                                   |
| PEF1         | 0.988946765                            | N                                            | 0                                      | N                                   |
| SAMD10       | 0.988946765                            | N                                            | 0                                      | N                                   |
| C15orf39     | 0.989016458                            | N                                            | 0                                      | N                                   |
| AC011448.1   | 0.989199533                            | N                                            | 0                                      | N                                   |
| AC022893.1   | 0.989199533                            | N                                            | 0                                      | N                                   |
| AL450992.1   | 0.989199533                            | N                                            | 0                                      | N                                   |
| AQP1         | 0.989199533                            | N                                            | 11                                     | N                                   |
| ARF1P2       | 0.989199533                            | N                                            | 0                                      | N                                   |
| CHMP4A       | 0.989199533                            | N                                            | 0                                      | N                                   |
| CHRNA3       | 0.989199533                            | N                                            | 1                                      | N                                   |
| ERP27        | 0.989199533                            | N                                            | 0                                      | N                                   |
| GGNBP2       | 0.989199533                            | N                                            | 0                                      | N                                   |
| GRAMD2A      | 0.989199533                            | N                                            | 0                                      | N                                   |
| LRRFIP1P1    | 0.989199533                            | N                                            | 0                                      | N                                   |
| NIFK-AS1     | 0.989199533                            | N                                            | 0                                      | N                                   |
| PELI3        | 0.989199533                            | N                                            | 2                                      | N                                   |
| PFKFB4       | 0.989199533                            | N                                            | 2                                      | N                                   |
| PLA2G4A      | 0.989199533                            | N                                            | 64                                     | N                                   |
| YRDC         | 0.989199533                            | N                                            | 0                                      | N                                   |
| YY1          | 0.989199533                            | N                                            | 34                                     | N                                   |
| AC012100.2   | 0.989237759                            | N                                            | 0                                      | N                                   |
| LINC00599    | 0.989237759                            | N                                            | 0                                      | N                                   |
| PHLDA1       | 0.989237759                            | N                                            | 6                                      | N                                   |
| PIGCP1       | 0.989237759                            | N                                            | 0                                      | N                                   |
| RP11-58E21.3 | 0.989237759                            | N                                            | 0                                      | N                                   |
| AL021807.1   | 0.989284619                            | N                                            | 0                                      | N                                   |
| AC116533.1   | 0.989417388                            | N                                            | 0                                      | N                                   |
| GATAD2A      | 0.989417388                            | N                                            | 2                                      | N                                   |
| AL596244.1   | 0.989434794                            | N                                            | 0                                      | N                                   |
| HSPA4        | 0.989434794                            | N                                            | 3                                      | N                                   |
| LINC00211    | 0.989434794                            | N                                            | 0                                      | N                                   |
| AC093214.1   | 0.989477388                            | N                                            | 0                                      | N                                   |
| AP003108.2   | 0.989477388                            | N                                            | 0                                      | N                                   |
| BACH1-IT3    | 0.989477388                            | N                                            | 0                                      | N                                   |

| Gene symbols | FDR (differential expression analysis) | Differentially expressed gene? Y, Yes; N, No | Number of insulin related publications | Insulin related gene? Y, Yes; N, No |
|--------------|----------------------------------------|----------------------------------------------|----------------------------------------|-------------------------------------|
| GALNT9       | 0.989477388                            | N                                            | 0                                      | N                                   |
| JSRP1        | 0.989477388                            | N                                            | 1                                      | N                                   |
| MFAP1P1      | 0.989477388                            | N                                            | 0                                      | N                                   |
| SGK1         | 0.989477388                            | N                                            | 107                                    | Y                                   |
| SPATA13      | 0.989477388                            | N                                            | 0                                      | N                                   |
| TNFAIP8L3    | 0.989477388                            | N                                            | 0                                      | N                                   |
| AC022916.1   | 0.98952342                             | N                                            | 0                                      | N                                   |
| MFN2         | 0.98952342                             | N                                            | 69                                     | N                                   |
| RPSAP6       | 0.989554367                            | N                                            | 0                                      | N                                   |
| SIMC1        | 0.989554367                            | N                                            | 0                                      | N                                   |
| AC007342.7   | 0.989562015                            | N                                            | 0                                      | N                                   |
| MYO5B        | 0.989562015                            | N                                            | 2                                      | N                                   |
| GINM1        | 0.98956912                             | N                                            | 0                                      | N                                   |
| PRDM10       | 0.98960632                             | N                                            | 1                                      | N                                   |
| ADPRH        | 0.989664041                            | N                                            | 0                                      | N                                   |
| PLEKHG4      | 0.989790752                            | N                                            | 2                                      | N                                   |
| TRIM47       | 0.989846576                            | N                                            | 1                                      | N                                   |
| CD68         | 0.989877443                            | N                                            | 298                                    | Y                                   |
| RIMS2        | 0.989877443                            | N                                            | 2                                      | N                                   |
| C1QL3        | 0.989884081                            | N                                            | 2                                      | N                                   |
| AL049543.1   | 0.989893008                            | N                                            | 0                                      | N                                   |
| AGK          | 0.98991298                             | N                                            | 0                                      | N                                   |
| IL17RC       | 0.98991298                             | N                                            | 1                                      | N                                   |
| AL121877.1   | 0.989929213                            | N                                            | 0                                      | N                                   |
| ANXA1        | 0.989929213                            | N                                            | 14                                     | N                                   |
| CHCHD2P6     | 0.989929213                            | N                                            | 0                                      | N                                   |
| GABPA        | 0.989929213                            | N                                            | 7                                      | N                                   |
| LRFN3        | 0.989929213                            | N                                            | 0                                      | N                                   |
| MYO1H        | 0.989929213                            | N                                            | 1                                      | N                                   |
| RPL23AP32    | 0.989929213                            | N                                            | 0                                      | N                                   |
| SLC6A5       | 0.989929213                            | N                                            | 1                                      | N                                   |
| SLC7A1       | 0.989929213                            | N                                            | 16                                     | N                                   |
| TMEM255B     | 0.989929213                            | N                                            | 0                                      | N                                   |
| AC023908.1   | 0.989945566                            | N                                            | 0                                      | N                                   |
| PAX1         | 0.989945566                            | N                                            | 0                                      | N                                   |
| AC034236.1   | 0.989988348                            | N                                            | 0                                      | N                                   |
| AC134349.2   | 0.989988348                            | N                                            | 0                                      | N                                   |
| TMEM179B     | 0.989988348                            | N                                            | 0                                      | N                                   |
| AC008429.2   | 0.990075233                            | N                                            | 0                                      | N                                   |
| ATP6V0D1     | 0.990075233                            | N                                            | 0                                      | N                                   |
| AC026401.2   | 0.990246619                            | N                                            | 0                                      | N                                   |
| AC060766.7   | 0.990246619                            | N                                            | 0                                      | N                                   |
| ACTG1P9      | 0.990246619                            | N                                            | 0                                      | N                                   |
| AP000560.1   | 0.990246619                            | N                                            | 0                                      | N                                   |
| CERS5        | 0.990246619                            | N                                            | 8                                      | N                                   |
| EPB41L4A     | 0.990246619                            | N                                            | 0                                      | N                                   |
| LINC00601    | 0.990246619                            | N                                            | 0                                      | N                                   |
| LINC02334    | 0.990246619                            | N                                            | 0                                      | N                                   |
| UNC93B1      | 0.990246619                            | N                                            | 0                                      | N                                   |
| FBXL16       | 0.990279105                            | N                                            | 0                                      | N                                   |
| U1           | 0.990310388                            | N                                            | 13                                     | N                                   |
| AC127496.7   | 0.990381957                            | N                                            | 0                                      | N                                   |
| JMJD1C-AS1   | 0.990381957                            | N                                            | 0                                      | N                                   |
| UBQLNL       | 0.990381957                            | N                                            | 0                                      | N                                   |
| MTMR7        | 0.990475727                            | N                                            | 1                                      | N                                   |
| PAIP2        | 0.990485579                            | N                                            | 0                                      | N                                   |
| AL157813.1   | 0.990494815                            | N                                            | 0                                      | N                                   |
| AMMECR1LP1   | 0.990494815                            | N                                            | 0                                      | N                                   |
| MIR503HG     | 0.990494815                            | N                                            | 0                                      | N                                   |
| AL049539.1   | 0.990555177                            | N                                            | 0                                      | N                                   |
| AL590094.1   | 0.990555177                            | N                                            | 0                                      | N                                   |
| AC007292.2   | 0.990558533                            | N                                            | 0                                      | N                                   |
| AC105942.1   | 0.990563523                            | N                                            | 0                                      | N                                   |
| ECEL1P2      | 0.990563523                            | N                                            | 0                                      | N                                   |
| EFCAB1       | 0.990563523                            | N                                            | 0                                      | N                                   |
| EXOC5P1      | 0.990563523                            | N                                            | 0                                      | N                                   |

| Gene symbols | FDR (differential expression analysis) | Differentially expressed gene? Y, Yes; N, No | Number of insulin related publications | Insulin related gene? Y, Yes; N, No |
|--------------|----------------------------------------|----------------------------------------------|----------------------------------------|-------------------------------------|
| AC124045.1   | 0.990577308                            | N                                            | 0                                      | N                                   |
| APCDD1L      | 0.990577308                            | N                                            | 0                                      | N                                   |
| ARFGEF3      | 0.990577308                            | N                                            | 0                                      | N                                   |
| C11orf44     | 0.990577308                            | N                                            | 0                                      | N                                   |
| CYP19A1      | 0.990577308                            | N                                            | 129                                    | Y                                   |
| GATD1        | 0.990577308                            | N                                            | 0                                      | N                                   |
| LINC01122    | 0.990577308                            | N                                            | 0                                      | N                                   |
| NCF2         | 0.990577308                            | N                                            | 5                                      | N                                   |
| RAB3B        | 0.990577308                            | N                                            | 5                                      | N                                   |
| SPTBN2       | 0.990577308                            | N                                            | 0                                      | N                                   |
| TSACC        | 0.990577308                            | N                                            | 0                                      | N                                   |
| ZFP82        | 0.990577308                            | N                                            | 1                                      | N                                   |
| THSD4        | 0.990630934                            | N                                            | 0                                      | N                                   |
| AF196779.12  | 0.990681286                            | N                                            | 0                                      | N                                   |
| ELOBP2       | 0.990681286                            | N                                            | 0                                      | N                                   |
| RAPGEF4      | 0.990681286                            | N                                            | 52                                     | N                                   |
| SEPT9        | 0.990809396                            | N                                            | 3                                      | N                                   |
| AC121758.1   | 0.990809396                            | N                                            | 0                                      | N                                   |
| AL035446.1   | 0.990809396                            | N                                            | 0                                      | N                                   |
| AL360012.1   | 0.990809396                            | N                                            | 0                                      | N                                   |
| ALKBH3       | 0.990809396                            | N                                            | 0                                      | N                                   |
| ALX1         | 0.990809396                            | N                                            | 0                                      | N                                   |
| B3GAT3P1     | 0.990809396                            | N                                            | 0                                      | N                                   |
| CYP3A5       | 0.990809396                            | N                                            | 83                                     | N                                   |
| KANSL1-AS1   | 0.990809396                            | N                                            | 0                                      | N                                   |
| MAB21L1      | 0.990809396                            | N                                            | 0                                      | N                                   |
| MLXIP        | 0.990809396                            | N                                            | 1                                      | N                                   |
| NOMO3        | 0.990809396                            | N                                            | 0                                      | N                                   |
| POLR3D       | 0.990809396                            | N                                            | 0                                      | N                                   |
| RFX5         | 0.990809396                            | N                                            | 0                                      | N                                   |
| SCRT2        | 0.990809396                            | N                                            | 0                                      | N                                   |
| SOCS4        | 0.990809396                            | N                                            | 4                                      | N                                   |
| TMEM97       | 0.990809396                            | N                                            | 3                                      | N                                   |
| Z97055.2     | 0.990809396                            | N                                            | 0                                      | N                                   |
| AC104117.4   | 0.99085729                             | N                                            | 0                                      | N                                   |
| AC069547.1   | 0.99087346                             | N                                            | 0                                      | N                                   |
| WDR48        | 0.99087346                             | N                                            | 0                                      | N                                   |
| RNF43        | 0.99087746                             | N                                            | 1                                      | N                                   |
| AC104451.1   | 0.990886598                            | N                                            | 0                                      | N                                   |
| ARHGEF33     | 0.990886598                            | N                                            | 0                                      | N                                   |
| NRN1         | 0.990958069                            | N                                            | 8                                      | N                                   |
| AC002451.2   | 0.990965652                            | N                                            | 0                                      | N                                   |
| LINC02408    | 0.990965652                            | N                                            | 0                                      | N                                   |
| LRMDA        | 0.990965652                            | N                                            | 0                                      | N                                   |
| ANXA2        | 0.991069401                            | N                                            | 35                                     | N                                   |
| AC092821.1   | 0.991130012                            | N                                            | 0                                      | N                                   |
| AP002383.4   | 0.991130012                            | N                                            | 0                                      | N                                   |
| TRIM46       | 0.991130012                            | N                                            | 0                                      | N                                   |
| WDR81        | 0.991130012                            | N                                            | 0                                      | N                                   |
| TRHDE-AS1    | 0.991150942                            | N                                            | 0                                      | N                                   |
| FAM84A       | 0.99132754                             | N                                            | 0                                      | N                                   |
| ANAPC10      | 0.991343153                            | N                                            | 0                                      | N                                   |
| BFAR         | 0.991367065                            | N                                            | 1                                      | N                                   |
| C2orf76      | 0.991367065                            | N                                            | 0                                      | N                                   |
| GEMIN8P4     | 0.991367065                            | N                                            | 0                                      | N                                   |
| MTND5P2      | 0.991367065                            | N                                            | 0                                      | N                                   |
| PKDCC        | 0.991500375                            | N                                            | 0                                      | N                                   |
| AC135050.2   | 0.991582794                            | N                                            | 0                                      | N                                   |
| AGBL5        | 0.991582794                            | N                                            | 0                                      | N                                   |
| AL109983.1   | 0.991582794                            | N                                            | 0                                      | N                                   |
| MYL6BP1      | 0.991582794                            | N                                            | 0                                      | N                                   |
| PDCD6IPP2    | 0.991582794                            | N                                            | 0                                      | N                                   |
| RSPO2        | 0.991582794                            | N                                            | 1                                      | N                                   |
| AL390728.4   | 0.991584958                            | N                                            | 0                                      | N                                   |
| AC008764.7   | 0.991604024                            | N                                            | 0                                      | N                                   |
| AC011462.1   | 0.991604024                            | N                                            | 0                                      | N                                   |



| Gene symbols | FDR (differential expression analysis) | Differentially expressed gene? Y, Yes; N, No | Number of insulin related publications | Insulin related gene? Y, Yes; N, No |
|--------------|----------------------------------------|----------------------------------------------|----------------------------------------|-------------------------------------|
| AL096870.2   | 0.991604024                            | N                                            | 0                                      | N                                   |
| AL390726.5   | 0.991604024                            | N                                            | 0                                      | N                                   |
| GIMAP1       | 0.991604024                            | N                                            | 0                                      | N                                   |
| GTPBP1       | 0.991604024                            | N                                            | 0                                      | N                                   |
| PRDM13       | 0.991604024                            | N                                            | 0                                      | N                                   |
| RAC3         | 0.991604024                            | N                                            | 2                                      | N                                   |
| RP5-886K2.1  | 0.991604024                            | N                                            | 0                                      | N                                   |
| RPS8P4       | 0.991604024                            | N                                            | 0                                      | N                                   |
| SUSD5        | 0.991604024                            | N                                            | 0                                      | N                                   |
| WNT7A        | 0.991604024                            | N                                            | 11                                     | N                                   |
| AL356133.1   | 0.991644488                            | N                                            | 0                                      | N                                   |
| HAMP         | 0.991644488                            | N                                            | 36                                     | N                                   |
| SUOX         | 0.99168232                             | N                                            | 1                                      | N                                   |
| AL136295.4   | 0.991777262                            | N                                            | 0                                      | N                                   |
| AC137767.1   | 0.991784622                            | N                                            | 0                                      | N                                   |
| KDM3B        | 0.991803775                            | N                                            | 1                                      | N                                   |
| OPA3         | 0.991816932                            | N                                            | 1                                      | N                                   |
| RGSL1        | 0.991941231                            | N                                            | 0                                      | N                                   |
| TRPA1        | 0.991941231                            | N                                            | 19                                     | N                                   |
| CSNK2B       | 0.992052365                            | N                                            | 0                                      | N                                   |
| LINC00452    | 0.992052365                            | N                                            | 0                                      | N                                   |
| MEIOC        | 0.992052365                            | N                                            | 0                                      | N                                   |
| STKLD1       | 0.992052365                            | N                                            | 0                                      | N                                   |
| DOCK11       | 0.992081077                            | N                                            | 0                                      | N                                   |
| GATA4        | 0.992081077                            | N                                            | 76                                     | N                                   |
| HRASLS       | 0.992081077                            | N                                            | 1                                      | N                                   |
| NEGR1        | 0.992081077                            | N                                            | 10                                     | N                                   |
| PRKAR2B      | 0.992081077                            | N                                            | 4                                      | N                                   |
| AL390961.4   | 0.992086257                            | N                                            | 0                                      | N                                   |
| SCYL1        | 0.992086257                            | N                                            | 0                                      | N                                   |
| NANOG        | 0.992093745                            | N                                            | 112                                    | Y                                   |
| TMEM126B     | 0.992103156                            | N                                            | 0                                      | N                                   |
| FIGN         | 0.992442682                            | N                                            | 0                                      | N                                   |
| PPM1E        | 0.99245403                             | N                                            | 0                                      | N                                   |
| RPL23A       | 0.992471843                            | N                                            | 0                                      | N                                   |
| UBA52P3      | 0.992519974                            | N                                            | 0                                      | N                                   |
| ATF3         | 0.992533854                            | N                                            | 72                                     | N                                   |
| BCAM         | 0.992572633                            | N                                            | 0                                      | N                                   |
| CASP16P      | 0.992572633                            | N                                            | 0                                      | N                                   |
| SEZ6L        | 0.992572633                            | N                                            | 1                                      | N                                   |
| TMSB10       | 0.992572633                            | N                                            | 1                                      | N                                   |
| IGF2-AS      | 0.992691214                            | N                                            | 49                                     | N                                   |
| LRRC37A2     | 0.992781158                            | N                                            | 0                                      | N                                   |
| MFS11        | 0.992788807                            | N                                            | 0                                      | N                                   |
| SYCP2L       | 0.992788807                            | N                                            | 0                                      | N                                   |
| TTL7-IT1     | 0.992837872                            | N                                            | 0                                      | N                                   |
| AC092964.1   | 0.992891643                            | N                                            | 0                                      | N                                   |
| CHL1         | 0.992891643                            | N                                            | 4                                      | N                                   |
| LINC01354    | 0.992891643                            | N                                            | 0                                      | N                                   |
| AC099804.1   | 0.992894495                            | N                                            | 0                                      | N                                   |
| DRC3         | 0.992894495                            | N                                            | 0                                      | N                                   |
| FAHD1        | 0.992894495                            | N                                            | 0                                      | N                                   |
| NCALD        | 0.992894495                            | N                                            | 0                                      | N                                   |
| PRELID3A     | 0.992894495                            | N                                            | 0                                      | N                                   |
| PSMD12       | 0.992894495                            | N                                            | 1                                      | N                                   |
| CHRNA4       | 0.992927584                            | N                                            | 0                                      | N                                   |
| SNX18P3      | 0.993026736                            | N                                            | 0                                      | N                                   |
| ABTB1        | 0.993109701                            | N                                            | 0                                      | N                                   |
| AC004076.1   | 0.993109701                            | N                                            | 0                                      | N                                   |
| AC068700.1   | 0.993109701                            | N                                            | 0                                      | N                                   |
| AC092691.2   | 0.993109701                            | N                                            | 0                                      | N                                   |
| ASGR1        | 0.993109701                            | N                                            | 2                                      | N                                   |
| BCL10        | 0.993109701                            | N                                            | 5                                      | N                                   |
| CELSR3       | 0.993109701                            | N                                            | 2                                      | N                                   |
| DRAXIN       | 0.993109701                            | N                                            | 0                                      | N                                   |
| KLLN         | 0.993109701                            | N                                            | 0                                      | N                                   |

| Gene symbols   | FDR (differential expression analysis) | Differentially expressed gene? Y, Yes; N, No | Number of insulin related publications | Insulin related gene? Y, Yes; N, No |
|----------------|----------------------------------------|----------------------------------------------|----------------------------------------|-------------------------------------|
| LINC01050      | 0.993109701                            | N                                            | 0                                      | N                                   |
| PGAM1P7        | 0.993109701                            | N                                            | 0                                      | N                                   |
| PLCE1          | 0.993109701                            | N                                            | 0                                      | N                                   |
| PRDM6          | 0.993109701                            | N                                            | 0                                      | N                                   |
| EP400          | 0.993169865                            | N                                            | 0                                      | N                                   |
| GUF1           | 0.993169865                            | N                                            | 0                                      | N                                   |
| MYO10          | 0.993169865                            | N                                            | 1                                      | N                                   |
| TAS2R20        | 0.99333391                             | N                                            | 0                                      | N                                   |
| AC034207.1     | 0.993334409                            | N                                            | 0                                      | N                                   |
| ARAF           | 0.993334409                            | N                                            | 4                                      | N                                   |
| FRMPD1         | 0.993334409                            | N                                            | 0                                      | N                                   |
| GBA            | 0.993334409                            | N                                            | 10                                     | N                                   |
| SLC25A1P1      | 0.993334409                            | N                                            | 0                                      | N                                   |
| Z95114.1       | 0.993334409                            | N                                            | 0                                      | N                                   |
| ZDHHC8P1       | 0.993334409                            | N                                            | 0                                      | N                                   |
| ZZZ3           | 0.993334409                            | N                                            | 0                                      | N                                   |
| TMEM184A       | 0.993420813                            | N                                            | 1                                      | N                                   |
| SLC27A5        | 0.9934437                              | N                                            | 4                                      | N                                   |
| HCFC1          | 0.993495781                            | N                                            | 7                                      | N                                   |
| AC079768.1     | 0.993515616                            | N                                            | 0                                      | N                                   |
| AL606760.2     | 0.993515616                            | N                                            | 0                                      | N                                   |
| HDAC1          | 0.993515616                            | N                                            | 65                                     | N                                   |
| YES1P1         | 0.993515616                            | N                                            | 0                                      | N                                   |
| AC018904.1     | 0.993554796                            | N                                            | 0                                      | N                                   |
| ELMOD3         | 0.993554796                            | N                                            | 0                                      | N                                   |
| BBOX1-AS1      | 0.993637304                            | N                                            | 0                                      | N                                   |
| C1orf115       | 0.993637304                            | N                                            | 0                                      | N                                   |
| FAM120C        | 0.993637304                            | N                                            | 0                                      | N                                   |
| NFKBIL1        | 0.993664967                            | N                                            | 1                                      | N                                   |
| AC092850.1     | 0.993673097                            | N                                            | 0                                      | N                                   |
| CCDC187        | 0.993673097                            | N                                            | 0                                      | N                                   |
| DNAJB12        | 0.993673097                            | N                                            | 0                                      | N                                   |
| DPP3P1         | 0.993673097                            | N                                            | 0                                      | N                                   |
| FAM78B         | 0.993673097                            | N                                            | 0                                      | N                                   |
| JAG1           | 0.993673097                            | N                                            | 16                                     | N                                   |
| LINC00271      | 0.993673097                            | N                                            | 0                                      | N                                   |
| RABEPK         | 0.993673097                            | N                                            | 0                                      | N                                   |
| SIRT6          | 0.993673097                            | N                                            | 52                                     | N                                   |
| TUBB3P1        | 0.993673097                            | N                                            | 0                                      | N                                   |
| C10orf25       | 0.993714377                            | N                                            | 0                                      | N                                   |
| RN7SL121P      | 0.993714377                            | N                                            | 0                                      | N                                   |
| SGCB           | 0.993714377                            | N                                            | 0                                      | N                                   |
| AC036214.1     | 0.993780672                            | N                                            | 0                                      | N                                   |
| AC073475.1     | 0.993780672                            | N                                            | 0                                      | N                                   |
| AC087392.3     | 0.993780672                            | N                                            | 0                                      | N                                   |
| CIZ1           | 0.993780672                            | N                                            | 0                                      | N                                   |
| DLL4           | 0.993780672                            | N                                            | 14                                     | N                                   |
| TAS2R43        | 0.993780672                            | N                                            | 0                                      | N                                   |
| TBL3           | 0.993780672                            | N                                            | 1                                      | N                                   |
| TMEM14A        | 0.993806906                            | N                                            | 0                                      | N                                   |
| AC021016.3     | 0.993845927                            | N                                            | 0                                      | N                                   |
| CYP27C1        | 0.993845927                            | N                                            | 0                                      | N                                   |
| DNAH7          | 0.993845927                            | N                                            | 0                                      | N                                   |
| FOS            | 0.993845927                            | N                                            | 845                                    | Y                                   |
| MPPED1         | 0.993845927                            | N                                            | 0                                      | N                                   |
| RSG1           | 0.993845927                            | N                                            | 0                                      | N                                   |
| UBR5-AS1       | 0.993845927                            | N                                            | 0                                      | N                                   |
| GNG10          | 0.993973024                            | N                                            | 1                                      | N                                   |
| HSD11B2        | 0.993973024                            | N                                            | 29                                     | N                                   |
| MRPS21P3       | 0.993981414                            | N                                            | 0                                      | N                                   |
| AC026368.1     | 0.99413508                             | N                                            | 0                                      | N                                   |
| CD151          | 0.99413508                             | N                                            | 4                                      | N                                   |
| EIF4EBP2P2     | 0.99413508                             | N                                            | 0                                      | N                                   |
| FAM13A         | 0.99413508                             | N                                            | 5                                      | N                                   |
| MGLL           | 0.99413508                             | N                                            | 3                                      | N                                   |
| SC22CB-109E1.1 | 0.99413508                             | N                                            | 0                                      | N                                   |

| Gene symbols | FDR (differential expression analysis) | Differentially expressed gene? Y, Yes; N, No | Number of insulin related publications | Insulin related gene? Y, Yes; N, No |
|--------------|----------------------------------------|----------------------------------------------|----------------------------------------|-------------------------------------|
| ZC3H3        | 0.994240826                            | N                                            | 0                                      | N                                   |
| FAM109A      | 0.994303119                            | N                                            | 0                                      | N                                   |
| BST1         | 0.994439429                            | N                                            | 0                                      | N                                   |
| AC005253.1   | 0.994552517                            | N                                            | 0                                      | N                                   |
| AC010655.4   | 0.994552517                            | N                                            | 0                                      | N                                   |
| AC027514.1   | 0.994552517                            | N                                            | 0                                      | N                                   |
| C1D          | 0.994552517                            | N                                            | 0                                      | N                                   |
| FO538757.1   | 0.994552517                            | N                                            | 0                                      | N                                   |
| LINC01393    | 0.994552517                            | N                                            | 0                                      | N                                   |
| MNT          | 0.994552517                            | N                                            | 42                                     | N                                   |
| NKD1         | 0.994552517                            | N                                            | 0                                      | N                                   |
| RPS11        | 0.994552517                            | N                                            | 0                                      | N                                   |
| SERBP1P6     | 0.994552517                            | N                                            | 0                                      | N                                   |
| TTYH1        | 0.994552517                            | N                                            | 0                                      | N                                   |
| AC010359.1   | 0.994611077                            | N                                            | 0                                      | N                                   |
| AC244153.1   | 0.994611077                            | N                                            | 0                                      | N                                   |
| AL589994.1   | 0.994611077                            | N                                            | 0                                      | N                                   |
| CCDC144A     | 0.994611077                            | N                                            | 0                                      | N                                   |
| HUS1         | 0.994611077                            | N                                            | 0                                      | N                                   |
| LRRC37A16P   | 0.994611077                            | N                                            | 0                                      | N                                   |
| PPP2CB       | 0.994611077                            | N                                            | 0                                      | N                                   |
| BID          | 0.99461538                             | N                                            | 321                                    | Y                                   |
| KDM6B        | 0.99461538                             | N                                            | 12                                     | N                                   |
| AC007389.4   | 0.994696515                            | N                                            | 0                                      | N                                   |
| AL391262.1   | 0.994696515                            | N                                            | 0                                      | N                                   |
| AL732414.1   | 0.994696515                            | N                                            | 0                                      | N                                   |
| AP1G2        | 0.994696515                            | N                                            | 0                                      | N                                   |
| CHST14       | 0.994696515                            | N                                            | 0                                      | N                                   |
| FAM228A      | 0.994696515                            | N                                            | 0                                      | N                                   |
| LGALS9       | 0.994696515                            | N                                            | 4                                      | N                                   |
| LINC01541    | 0.994696515                            | N                                            | 0                                      | N                                   |
| MIOX         | 0.994696515                            | N                                            | 4                                      | N                                   |
| POTEJ        | 0.994696515                            | N                                            | 0                                      | N                                   |
| STAU2        | 0.994742238                            | N                                            | 0                                      | N                                   |
| AC078880.4   | 0.994839556                            | N                                            | 0                                      | N                                   |
| AC010538.1   | 0.994884318                            | N                                            | 0                                      | N                                   |
| AC092042.2   | 0.994884318                            | N                                            | 0                                      | N                                   |
| AC095055.1   | 0.994884318                            | N                                            | 0                                      | N                                   |
| ANKHD1       | 0.994884318                            | N                                            | 0                                      | N                                   |
| LMNTD2       | 0.994884318                            | N                                            | 0                                      | N                                   |
| AC073487.1   | 0.994955698                            | N                                            | 0                                      | N                                   |
| C7orf73      | 0.994955698                            | N                                            | 1                                      | N                                   |
| ELK1         | 0.994955698                            | N                                            | 49                                     | N                                   |
| STK3         | 0.994955698                            | N                                            | 2                                      | N                                   |
| PARG         | 0.995008697                            | N                                            | 2                                      | N                                   |
| AL031708.1   | 0.995103302                            | N                                            | 0                                      | N                                   |
| LONP1        | 0.995103302                            | N                                            | 2                                      | N                                   |
| ASNSD1       | 0.995216669                            | N                                            | 0                                      | N                                   |
| AC067942.1   | 0.995305968                            | N                                            | 0                                      | N                                   |
| AC069208.1   | 0.995305968                            | N                                            | 0                                      | N                                   |
| AC073610.1   | 0.995305968                            | N                                            | 0                                      | N                                   |
| MPC2         | 0.995305968                            | N                                            | 11                                     | N                                   |
| MTND4P32     | 0.995305968                            | N                                            | 0                                      | N                                   |
| TMEM138      | 0.995305968                            | N                                            | 0                                      | N                                   |
| AC079178.2   | 0.995343344                            | N                                            | 0                                      | N                                   |
| MNAT1        | 0.995343344                            | N                                            | 0                                      | N                                   |
| UBP1         | 0.995343344                            | N                                            | 1                                      | N                                   |
| HELQ         | 0.995355664                            | N                                            | 0                                      | N                                   |
| KRT18P37     | 0.995439698                            | N                                            | 0                                      | N                                   |
| AC022121.1   | 0.995488848                            | N                                            | 0                                      | N                                   |
| AC116407.2   | 0.995488848                            | N                                            | 0                                      | N                                   |
| AL512506.1   | 0.995488848                            | N                                            | 0                                      | N                                   |
| AL662899.1   | 0.995488848                            | N                                            | 0                                      | N                                   |
| BAIAP2-AS1   | 0.995488848                            | N                                            | 0                                      | N                                   |
| FCGR2A       | 0.995488848                            | N                                            | 1                                      | N                                   |
| KLK10        | 0.995488848                            | N                                            | 2                                      | N                                   |

| Gene symbols | FDR (differential expression analysis) | Differentially expressed gene? Y, Yes; N, No | Number of insulin related publications | Insulin related gene? Y, Yes; N, No |
|--------------|----------------------------------------|----------------------------------------------|----------------------------------------|-------------------------------------|
| MAFK         | 0.995488848                            | N                                            | 7                                      | N                                   |
| VPS26A       | 0.995488848                            | N                                            | 5                                      | N                                   |
| ZNF137P      | 0.995488848                            | N                                            | 0                                      | N                                   |
| GRK3         | 0.995508418                            | N                                            | 3                                      | N                                   |
| VT11A        | 0.995570556                            | N                                            | 3                                      | N                                   |
| AC004494.1   | 0.995696694                            | N                                            | 0                                      | N                                   |
| AC026304.1   | 0.995696694                            | N                                            | 0                                      | N                                   |
| BX322784.1   | 0.995696694                            | N                                            | 0                                      | N                                   |
| CCDC115      | 0.995696694                            | N                                            | 0                                      | N                                   |
| MEGF11       | 0.995696694                            | N                                            | 0                                      | N                                   |
| RASD2        | 0.995696694                            | N                                            | 5                                      | N                                   |
| TFEC         | 0.995696694                            | N                                            | 1                                      | N                                   |
| AC009093.3   | 0.995843158                            | N                                            | 0                                      | N                                   |
| AC018553.1   | 0.995843158                            | N                                            | 0                                      | N                                   |
| B3GNT2       | 0.995843158                            | N                                            | 0                                      | N                                   |
| RIN3         | 0.995843158                            | N                                            | 0                                      | N                                   |
| RPIAP1       | 0.995843158                            | N                                            | 0                                      | N                                   |
| YTHDF1       | 0.995843158                            | N                                            | 2                                      | N                                   |
| AC006058.4   | 0.995962288                            | N                                            | 0                                      | N                                   |
| AC079807.2   | 0.995980976                            | N                                            | 0                                      | N                                   |
| AC009108.3   | 0.996040583                            | N                                            | 0                                      | N                                   |
| ADAMTS14     | 0.996040583                            | N                                            | 1                                      | N                                   |
| PTP4A1       | 0.996133322                            | N                                            | 3                                      | N                                   |
| HIGD1AP1     | 0.996172885                            | N                                            | 0                                      | N                                   |
| EIF2A        | 0.996344726                            | N                                            | 11                                     | N                                   |
| KCP          | 0.996344726                            | N                                            | 1                                      | N                                   |
| LINC02210    | 0.996344726                            | N                                            | 0                                      | N                                   |
| STK11IP      | 0.996344726                            | N                                            | 0                                      | N                                   |
| AF250324.1   | 0.996414157                            | N                                            | 0                                      | N                                   |
| AL590704.1   | 0.996414157                            | N                                            | 0                                      | N                                   |
| ANKS3        | 0.996414157                            | N                                            | 0                                      | N                                   |
| GIPC3        | 0.996414157                            | N                                            | 1                                      | N                                   |
| NAA10        | 0.996414157                            | N                                            | 0                                      | N                                   |
| NPHP3-AS1    | 0.996414157                            | N                                            | 0                                      | N                                   |
| TRIB1        | 0.996414157                            | N                                            | 11                                     | N                                   |
| ZNF740       | 0.996414157                            | N                                            | 0                                      | N                                   |
| AC012254.3   | 0.996519796                            | N                                            | 0                                      | N                                   |
| AC245041.2   | 0.996519796                            | N                                            | 0                                      | N                                   |
| C9orf72      | 0.996519796                            | N                                            | 0                                      | N                                   |
| DUSP4        | 0.996519796                            | N                                            | 5                                      | N                                   |
| INE2         | 0.996519796                            | N                                            | 0                                      | N                                   |
| KIAA2012     | 0.996519796                            | N                                            | 0                                      | N                                   |
| MRPS15       | 0.996519796                            | N                                            | 0                                      | N                                   |
| SF1          | 0.996519796                            | N                                            | 50                                     | N                                   |
| SMUG1        | 0.996519796                            | N                                            | 1                                      | N                                   |
| USP6NL       | 0.996519796                            | N                                            | 0                                      | N                                   |
| VEGFB        | 0.996519796                            | N                                            | 17                                     | N                                   |
| AC002044.2   | 0.996527075                            | N                                            | 0                                      | N                                   |
| AC027702.1   | 0.996527075                            | N                                            | 0                                      | N                                   |
| AKAP5        | 0.996527075                            | N                                            | 5                                      | N                                   |
| CCDC177      | 0.996527075                            | N                                            | 0                                      | N                                   |
| CPTP         | 0.996527075                            | N                                            | 4                                      | N                                   |
| KCNQ2        | 0.996527075                            | N                                            | 1                                      | N                                   |
| PISD         | 0.996527075                            | N                                            | 0                                      | N                                   |
| RPL5P8       | 0.996527075                            | N                                            | 0                                      | N                                   |
| RYR2         | 0.996527075                            | N                                            | 101                                    | Y                                   |
| YWHAEP1      | 0.996527075                            | N                                            | 0                                      | N                                   |
| TECPR1       | 0.996562248                            | N                                            | 0                                      | N                                   |
| RP11-673E1.4 | 0.996655144                            | N                                            | 0                                      | N                                   |
| TMEM110      | 0.996655144                            | N                                            | 0                                      | N                                   |
| TOMM34       | 0.996655144                            | N                                            | 1                                      | N                                   |
| AC040160.2   | 0.996734446                            | N                                            | 0                                      | N                                   |
| AC130895.1   | 0.996734446                            | N                                            | 0                                      | N                                   |
| AL671511.1   | 0.996734446                            | N                                            | 0                                      | N                                   |
| SPRYD7       | 0.996734446                            | N                                            | 0                                      | N                                   |
| AC067931.1   | 0.996841996                            | N                                            | 0                                      | N                                   |

| Gene symbols | FDR (differential expression analysis) | Differentially expressed gene? Y, Yes; N, No | Number of insulin related publications | Insulin related gene? Y, Yes; N, No |
|--------------|----------------------------------------|----------------------------------------------|----------------------------------------|-------------------------------------|
| ZNF718       | 0.996902578                            | N                                            | 0                                      | N                                   |
| AC113383.1   | 0.996918197                            | N                                            | 0                                      | N                                   |
| SGCA         | 0.996959177                            | N                                            | 2                                      | N                                   |
| AC093462.1   | 0.997021198                            | N                                            | 0                                      | N                                   |
| ABCD4        | 0.997038782                            | N                                            | 1                                      | N                                   |
| FAM46B       | 0.997070089                            | N                                            | 0                                      | N                                   |
| USH2A        | 0.997154702                            | N                                            | 0                                      | N                                   |
| ZNF706       | 0.997192762                            | N                                            | 0                                      | N                                   |
| TRIP6        | 0.997302883                            | N                                            | 0                                      | N                                   |
| MLLT6        | 0.997424406                            | N                                            | 0                                      | N                                   |
| GNB5         | 0.997447626                            | N                                            | 2                                      | N                                   |
| AC003035.1   | 0.99753282                             | N                                            | 0                                      | N                                   |
| AC003991.1   | 0.99753282                             | N                                            | 0                                      | N                                   |
| AC023078.6   | 0.99753282                             | N                                            | 0                                      | N                                   |
| AC093484.4   | 0.99753282                             | N                                            | 0                                      | N                                   |
| AC106782.1   | 0.99753282                             | N                                            | 0                                      | N                                   |
| AC134043.2   | 0.99753282                             | N                                            | 0                                      | N                                   |
| AIRE         | 0.99753282                             | N                                            | 74                                     | N                                   |
| AL031846.2   | 0.99753282                             | N                                            | 0                                      | N                                   |
| AL161729.1   | 0.99753282                             | N                                            | 0                                      | N                                   |
| AL162377.1   | 0.99753282                             | N                                            | 0                                      | N                                   |
| AP001107.9   | 0.99753282                             | N                                            | 0                                      | N                                   |
| ATRNL1       | 0.99753282                             | N                                            | 1                                      | N                                   |
| CACNB1       | 0.99753282                             | N                                            | 0                                      | N                                   |
| CDK15        | 0.99753282                             | N                                            | 0                                      | N                                   |
| CIB2         | 0.99753282                             | N                                            | 0                                      | N                                   |
| CNOT6        | 0.99753282                             | N                                            | 2                                      | N                                   |
| CPSF6        | 0.99753282                             | N                                            | 0                                      | N                                   |
| CRIP2        | 0.99753282                             | N                                            | 0                                      | N                                   |
| DPM1         | 0.99753282                             | N                                            | 0                                      | N                                   |
| DUX4L26      | 0.99753282                             | N                                            | 0                                      | N                                   |
| EEFSEC       | 0.99753282                             | N                                            | 0                                      | N                                   |
| FAAP100      | 0.99753282                             | N                                            | 0                                      | N                                   |
| FLYWCH2      | 0.99753282                             | N                                            | 0                                      | N                                   |
| FOXD2-AS1    | 0.99753282                             | N                                            | 0                                      | N                                   |
| INPP5K       | 0.99753282                             | N                                            | 0                                      | N                                   |
| KLC1         | 0.99753282                             | N                                            | 3                                      | N                                   |
| LINC01235    | 0.99753282                             | N                                            | 0                                      | N                                   |
| LINC01750    | 0.99753282                             | N                                            | 0                                      | N                                   |
| MAFB         | 0.99753282                             | N                                            | 65                                     | N                                   |
| MGST2        | 0.99753282                             | N                                            | 0                                      | N                                   |
| MICALL1      | 0.99753282                             | N                                            | 0                                      | N                                   |
| MMP16        | 0.99753282                             | N                                            | 1                                      | N                                   |
| MTCYBP3      | 0.99753282                             | N                                            | 0                                      | N                                   |
| MTMR12       | 0.99753282                             | N                                            | 0                                      | N                                   |
| PDHA2        | 0.99753282                             | N                                            | 0                                      | N                                   |
| PSD          | 0.99753282                             | N                                            | 85                                     | N                                   |
| PTPRC        | 0.99753282                             | N                                            | 20                                     | N                                   |
| REM2         | 0.99753282                             | N                                            | 1                                      | N                                   |
| RN7SKP48     | 0.99753282                             | N                                            | 0                                      | N                                   |
| RN7SL683P    | 0.99753282                             | N                                            | 0                                      | N                                   |
| SMAD7        | 0.99753282                             | N                                            | 28                                     | N                                   |
| SNHG6        | 0.99753282                             | N                                            | 0                                      | N                                   |
| TDO2         | 0.99753282                             | N                                            | 2                                      | N                                   |
| TLE2         | 0.99753282                             | N                                            | 2                                      | N                                   |
| TRIM24       | 0.99753282                             | N                                            | 0                                      | N                                   |
| USP17L2      | 0.99753282                             | N                                            | 0                                      | N                                   |
| VPS50        | 0.99753282                             | N                                            | 0                                      | N                                   |
| AC020898.1   | 0.997543633                            | N                                            | 0                                      | N                                   |
| AL135978.1   | 0.997543633                            | N                                            | 0                                      | N                                   |
| BCL9L        | 0.997543633                            | N                                            | 0                                      | N                                   |
| EP400NL      | 0.997543633                            | N                                            | 0                                      | N                                   |
| FUOM         | 0.997543633                            | N                                            | 0                                      | N                                   |
| HEY2         | 0.997543633                            | N                                            | 1                                      | N                                   |
| MAPKAPK2     | 0.997543633                            | N                                            | 14                                     | N                                   |
| MYCBPAP      | 0.997543633                            | N                                            | 0                                      | N                                   |

| Gene symbols | FDR (differential expression analysis) | Differentially expressed gene? Y, Yes; N, No | Number of insulin related publications | Insulin related gene? Y, Yes; N, No |
|--------------|----------------------------------------|----------------------------------------------|----------------------------------------|-------------------------------------|
| PLK3         | 0.997543633                            | N                                            | 2                                      | N                                   |
| RPS3         | 0.997607849                            | N                                            | 0                                      | N                                   |
| ESRRA        | 0.997820927                            | N                                            | 5                                      | N                                   |
| AC017007.2   | 0.997988925                            | N                                            | 0                                      | N                                   |
| AC073063.1   | 0.997988925                            | N                                            | 0                                      | N                                   |
| AC079174.1   | 0.997988925                            | N                                            | 0                                      | N                                   |
| AC097460.3   | 0.997988925                            | N                                            | 0                                      | N                                   |
| AF129075.2   | 0.997988925                            | N                                            | 0                                      | N                                   |
| BLZF2P       | 0.997988925                            | N                                            | 0                                      | N                                   |
| COMMD10      | 0.997988925                            | N                                            | 0                                      | N                                   |
| HARS2        | 0.997988925                            | N                                            | 0                                      | N                                   |
| INO80B       | 0.997988925                            | N                                            | 1                                      | N                                   |
| LINC01237    | 0.997988925                            | N                                            | 0                                      | N                                   |
| MELTF        | 0.997988925                            | N                                            | 0                                      | N                                   |
| RABGGTA      | 0.997988925                            | N                                            | 0                                      | N                                   |
| RTL1         | 0.997988925                            | N                                            | 6                                      | N                                   |
| VIPAS39      | 0.997988925                            | N                                            | 0                                      | N                                   |
| ZNF808       | 0.997988925                            | N                                            | 0                                      | N                                   |
| AC115223.1   | 0.9980546                              | N                                            | 0                                      | N                                   |
| ADAM15       | 0.9980546                              | N                                            | 5                                      | N                                   |
| AHCYP4       | 0.9980546                              | N                                            | 0                                      | N                                   |
| CNIH4        | 0.9980546                              | N                                            | 0                                      | N                                   |
| CYBA         | 0.9980546                              | N                                            | 19                                     | N                                   |
| EPHA4        | 0.9980546                              | N                                            | 10                                     | N                                   |
| FAM161B      | 0.9980546                              | N                                            | 0                                      | N                                   |
| FRMD6-AS1    | 0.9980546                              | N                                            | 0                                      | N                                   |
| HSPB1P2      | 0.9980546                              | N                                            | 0                                      | N                                   |
| LAMTOR5P1    | 0.9980546                              | N                                            | 0                                      | N                                   |
| LINC01001    | 0.9980546                              | N                                            | 0                                      | N                                   |
| LUCAT1       | 0.9980546                              | N                                            | 0                                      | N                                   |
| OTOG         | 0.9980546                              | N                                            | 0                                      | N                                   |
| SNORA63D     | 0.9980546                              | N                                            | 0                                      | N                                   |
| TMEM222      | 0.9980546                              | N                                            | 0                                      | N                                   |
| TNFSF9       | 0.9980546                              | N                                            | 2                                      | N                                   |
| WT1          | 0.9980546                              | N                                            | 125                                    | Y                                   |
| ZNF668       | 0.9980546                              | N                                            | 0                                      | N                                   |
| ARL2         | 0.99821667                             | N                                            | 0                                      | N                                   |
| BRD4         | 0.99821667                             | N                                            | 11                                     | N                                   |
| PALM         | 0.99821667                             | N                                            | 204                                    | Y                                   |
| SLC7A2       | 0.99821667                             | N                                            | 2                                      | N                                   |
| AC083843.2   | 0.998272516                            | N                                            | 0                                      | N                                   |
| CHCHD7       | 0.998272516                            | N                                            | 1                                      | N                                   |
| MFSD5        | 0.998304083                            | N                                            | 0                                      | N                                   |
| NETO1        | 0.998336934                            | N                                            | 0                                      | N                                   |
| AC027796.1   | 0.998413135                            | N                                            | 0                                      | N                                   |
| DUSP10       | 0.998413135                            | N                                            | 3                                      | N                                   |
| DYNC1I2P1    | 0.998413135                            | N                                            | 0                                      | N                                   |
| GRM1         | 0.998413135                            | N                                            | 4                                      | N                                   |
| KCNMA1-AS1   | 0.998413135                            | N                                            | 0                                      | N                                   |
| KRTAP1-5     | 0.998413135                            | N                                            | 0                                      | N                                   |
| MCOLN1       | 0.998413135                            | N                                            | 0                                      | N                                   |
| PAMR1        | 0.998413135                            | N                                            | 1                                      | N                                   |
| VTRNA2-1     | 0.998413135                            | N                                            | 1                                      | N                                   |
| Z83851.1     | 0.998413135                            | N                                            | 0                                      | N                                   |
| AASDHPPT     | 0.998426572                            | N                                            | 0                                      | N                                   |
| AC009094.1   | 0.998426572                            | N                                            | 0                                      | N                                   |
| AC012306.2   | 0.998426572                            | N                                            | 0                                      | N                                   |
| ADAMTS7P4    | 0.998426572                            | N                                            | 0                                      | N                                   |
| BOK          | 0.998426572                            | N                                            | 14                                     | N                                   |
| CEP170B      | 0.998426572                            | N                                            | 0                                      | N                                   |
| CSRP1        | 0.998426572                            | N                                            | 0                                      | N                                   |
| DDX58        | 0.998426572                            | N                                            | 8                                      | N                                   |
| ERVFRD-1     | 0.998426572                            | N                                            | 1                                      | N                                   |
| FALEC        | 0.998426572                            | N                                            | 0                                      | N                                   |
| KARSP3       | 0.998426572                            | N                                            | 0                                      | N                                   |
| KLHL32       | 0.998426572                            | N                                            | 0                                      | N                                   |

| Gene symbols  | FDR (differential expression analysis) | Differentially expressed gene? Y, Yes; N, No | Number of insulin related publications | Insulin related gene? Y, Yes; N, No |
|---------------|----------------------------------------|----------------------------------------------|----------------------------------------|-------------------------------------|
| MFSD6         | 0.998426572                            | N                                            | 0                                      | N                                   |
| PQLC2L        | 0.998426572                            | N                                            | 0                                      | N                                   |
| TMSB10P1      | 0.998426572                            | N                                            | 0                                      | N                                   |
| ZNF441        | 0.998426572                            | N                                            | 0                                      | N                                   |
| AC006441.1    | 0.998463859                            | N                                            | 0                                      | N                                   |
| KIAA1671      | 0.998463859                            | N                                            | 0                                      | N                                   |
| AC105391.1    | 0.998602627                            | N                                            | 0                                      | N                                   |
| AL354794.2    | 0.998602627                            | N                                            | 0                                      | N                                   |
| KMT2D         | 0.998602627                            | N                                            | 2                                      | N                                   |
| USP12PX       | 0.998628849                            | N                                            | 0                                      | N                                   |
| AC234644.1    | 0.998662168                            | N                                            | 0                                      | N                                   |
| AC010761.2    | 0.998705469                            | N                                            | 0                                      | N                                   |
| AC068338.2    | 0.998705469                            | N                                            | 0                                      | N                                   |
| AC145285.4    | 0.998705469                            | N                                            | 0                                      | N                                   |
| RAB11FIP3     | 0.998789986                            | N                                            | 0                                      | N                                   |
| ARF4-AS1      | 0.998867507                            | N                                            | 0                                      | N                                   |
| ANXA10        | 0.998983471                            | N                                            | 1                                      | N                                   |
| RNF103-CHMP3  | 0.998983552                            | N                                            | 0                                      | N                                   |
| AC090568.1    | 0.998989037                            | N                                            | 0                                      | N                                   |
| CR382285.1    | 0.998989037                            | N                                            | 0                                      | N                                   |
| FAM60A        | 0.998989037                            | N                                            | 0                                      | N                                   |
| KIF9          | 0.998989037                            | N                                            | 0                                      | N                                   |
| POLR2A        | 0.998989037                            | N                                            | 0                                      | N                                   |
| SNORA23       | 0.998989037                            | N                                            | 0                                      | N                                   |
| TAP1          | 0.998989037                            | N                                            | 28                                     | N                                   |
| MED12L        | 0.998993612                            | N                                            | 1                                      | N                                   |
| C16orf70      | 0.999090875                            | N                                            | 0                                      | N                                   |
| SCX           | 0.999251136                            | N                                            | 14                                     | N                                   |
| AC009244.1    | 0.99925675                             | N                                            | 0                                      | N                                   |
| AL138724.1    | 0.99925675                             | N                                            | 0                                      | N                                   |
| CCDC144NL-AS1 | 0.99925675                             | N                                            | 0                                      | N                                   |
| ISG15         | 0.99925675                             | N                                            | 5                                      | N                                   |
| NEFM          | 0.99925675                             | N                                            | 1                                      | N                                   |
| TLX1          | 0.99925675                             | N                                            | 3                                      | N                                   |
| BMP1          | 0.999256998                            | N                                            | 7                                      | N                                   |
| COL18A1       | 0.999335302                            | N                                            | 18                                     | N                                   |
| KCCAT198      | 0.99934093                             | N                                            | 0                                      | N                                   |
| BEND3         | 0.999369454                            | N                                            | 0                                      | N                                   |
| GRIA4         | 0.999369454                            | N                                            | 3                                      | N                                   |
| TRAPPC1       | 0.999369454                            | N                                            | 0                                      | N                                   |
| PSMB10        | 0.999384357                            | N                                            | 1                                      | N                                   |
| CTA-14H9.5    | 0.999411289                            | N                                            | 0                                      | N                                   |
| HDAC11        | 0.999411289                            | N                                            | 4                                      | N                                   |
| AC025594.2    | 0.999457379                            | N                                            | 0                                      | N                                   |
| BPI           | 0.999457379                            | N                                            | 12                                     | N                                   |
| AC090515.5    | 0.999506558                            | N                                            | 0                                      | N                                   |
| AL139393.2    | 0.999506558                            | N                                            | 0                                      | N                                   |
| AL512844.2    | 0.999506558                            | N                                            | 0                                      | N                                   |
| CNPY4         | 0.999506558                            | N                                            | 0                                      | N                                   |
| LAT2          | 0.999506558                            | N                                            | 6                                      | N                                   |
| AC011330.2    | 0.999571748                            | N                                            | 0                                      | N                                   |
| AC011611.6    | 0.999571748                            | N                                            | 0                                      | N                                   |
| AC016907.2    | 0.999571748                            | N                                            | 0                                      | N                                   |
| AC092143.2    | 0.999571748                            | N                                            | 0                                      | N                                   |
| AC108215.1    | 0.999571748                            | N                                            | 0                                      | N                                   |
| ADGRF5        | 0.999571748                            | N                                            | 0                                      | N                                   |
| AGGF1P9       | 0.999571748                            | N                                            | 0                                      | N                                   |
| AL139353.1    | 0.999571748                            | N                                            | 0                                      | N                                   |
| AL162632.3    | 0.999571748                            | N                                            | 0                                      | N                                   |
| ANKFN1        | 0.999571748                            | N                                            | 0                                      | N                                   |
| ELOB          | 0.999571748                            | N                                            | 0                                      | N                                   |
| ERO1A         | 0.999571748                            | N                                            | 4                                      | N                                   |
| FAM213AP2     | 0.999571748                            | N                                            | 0                                      | N                                   |
| FIG4          | 0.999571748                            | N                                            | 3                                      | N                                   |
| FMR1          | 0.999571748                            | N                                            | 19                                     | N                                   |
| GACAT2        | 0.999571748                            | N                                            | 0                                      | N                                   |

| Gene symbols | FDR (differential expression analysis) | Differentially expressed gene? Y, Yes; N, No | Number of insulin related publications | Insulin related gene? Y, Yes; N, No |
|--------------|----------------------------------------|----------------------------------------------|----------------------------------------|-------------------------------------|
| GNPDA2       | 0.999571748                            | N                                            | 11                                     | N                                   |
| HRASLS5      | 0.999571748                            | N                                            | 0                                      | N                                   |
| ICA1         | 0.999571748                            | N                                            | 25                                     | N                                   |
| IPO8         | 0.999571748                            | N                                            | 0                                      | N                                   |
| LENG9        | 0.999571748                            | N                                            | 0                                      | N                                   |
| MAP3K10      | 0.999571748                            | N                                            | 2                                      | N                                   |
| NBPF12       | 0.999571748                            | N                                            | 0                                      | N                                   |
| NCKAP5       | 0.999571748                            | N                                            | 0                                      | N                                   |
| NUDT9        | 0.999571748                            | N                                            | 4                                      | N                                   |
| RNU1-19P     | 0.999571748                            | N                                            | 0                                      | N                                   |
| SENP2        | 0.999571748                            | N                                            | 3                                      | N                                   |
| TINCR        | 0.999571748                            | N                                            | 1                                      | N                                   |
| ZBTB32       | 0.999571748                            | N                                            | 0                                      | N                                   |
| RPL7AP6      | 0.999593872                            | N                                            | 0                                      | N                                   |
| AC093010.2   | 0.999631629                            | N                                            | 0                                      | N                                   |
| CEBPA        | 0.999631629                            | N                                            | 411                                    | Y                                   |
| AC079089.2   | 0.999653251                            | N                                            | 0                                      | N                                   |
| SYNGR2       | 0.999775485                            | N                                            | 0                                      | N                                   |
| AC114491.1   | 0.999821239                            | N                                            | 0                                      | N                                   |
| CADM1        | 0.999821239                            | N                                            | 7                                      | N                                   |
| LINC02503    | 0.999821239                            | N                                            | 0                                      | N                                   |
| NXPH3        | 0.999821239                            | N                                            | 0                                      | N                                   |
| PRKCB        | 0.999821239                            | N                                            | 6                                      | N                                   |
| RPS15AP29    | 0.999821239                            | N                                            | 0                                      | N                                   |
| SMIM19       | 0.999821239                            | N                                            | 0                                      | N                                   |
| ZNF74        | 0.999839336                            | N                                            | 0                                      | N                                   |
| AL365259.1   | 0.99984787                             | N                                            | 0                                      | N                                   |
| ETS1         | 0.99984787                             | N                                            | 17                                     | N                                   |
| OPN1SW       | 0.99984787                             | N                                            | 0                                      | N                                   |
| TAB1         | 0.99984787                             | N                                            | 9                                      | N                                   |



**Supplemental Table 8 | Demographics and symptom severity of subjects in the IRS studies**

|                        | Healthy Control (HC) | Schizophrenia (SZ) | Bipolar disorder (BP) |
|------------------------|----------------------|--------------------|-----------------------|
| N                      | 15                   | 15                 | 11                    |
| Age                    | 34.7±3.1             | 32.4±3.2           | 41.0±3.3              |
| Gender (Male/Female)*  | 12/3                 | 10/5               | 3/8                   |
| Race (Caucasian/Other) | 6/9                  | 4/11               | 8/3                   |
| Smoking (Yes/No)       | 4/11                 | 9/6                | 4/7                   |
| SANS                   |                      | 6.38±1.58          |                       |
| SAPS                   |                      | 2.92±1.08          |                       |
| MADRS                  |                      |                    | 7.73±1.18             |
| YMRS                   |                      |                    | 1.09±0.62             |

\* $P < 0.05$

SANS: The Scale for the Assessment of Negative Symptoms

SAPS: The Scale for the Assessment of Positive Symptoms

MADRS: Montgomery Asberg Depression Rating Scale

YMRS: Young Mania Rating Scale
